# Supplementary material for: Organocatalytic asymmetric synthesis of α-amino esters from sulfoxonium ylides
Source: Royal Society of Chemistry journal article supplement (doi:10.1039/d1sc02439f), 2021-01-01

Electronic Supplementary Information

**Organocatalytic Asymmetric Synthesis of  $\alpha$ -Amino Esters  
from Sulfoxonium Ylides**

Wengang Guo,<sup>1</sup> Min Wang,<sup>1</sup> Zhengyu Han,<sup>1</sup> Hai Huang,<sup>1\*</sup> and Jianwei Sun<sup>1,2\*</sup>

<sup>1</sup>*Jiangsu Key Laboratory of Advanced Catalytic Materials & Technology, School of Petrochemical Engineering, Changzhou University, Changzhou, China*

<sup>2</sup>*Department of Chemistry, The Hong Kong University of Science and Technology, Clear Water Bay, Kowloon, Hong Kong SAR, China*

**Table of Contents**

|                                                                                             |             |
|---------------------------------------------------------------------------------------------|-------------|
| <b>I. General Information .....</b>                                                         | <b>S-2</b>  |
| <b>II. Substrate Preparation .....</b>                                                      | <b>S-3</b>  |
| <b>III. Catalytic Asymmetric Synthesis of Chiral <math>\alpha</math>-Amino Esters .....</b> | <b>S-16</b> |
| <b>IV. Gram-Scale Reaction.....</b>                                                         | <b>S-42</b> |
| <b>V. Mechanistic Study .....</b>                                                           | <b>S-43</b> |
| <b>VI. Sensitivity Assessment.....</b>                                                      | <b>S-55</b> |
| <b>VII. Determination of the Product Stereochemistry .....</b>                              | <b>S-59</b> |
| <b>NMR Spectra and HPLC Traces</b>                                                          |             |

## I. General Information

Flash column chromatography was performed over silica gel (200-300 mesh) purchased from Qindao Puke Co., China. All air or moisture sensitive reactions were conducted in oven-dried glassware under nitrogen atmosphere using anhydrous solvents. Anhydrous acetonitrile was purified by the Innovative® solvent purification system or purchased from J&K Scientific Ltd. Anhydrous dimethyl sulfoxide (DMSO), 1,2-dichloroethane (DCE), methyl *tert*-butyl ether (MTBE), tetrahydrofuran (THF), benzotrifluoride (CF<sub>3</sub>C<sub>6</sub>H<sub>5</sub>), and chlorobenzene (ClC<sub>6</sub>H<sub>5</sub>) were purchased from J&K Scientific Ltd. Chloroform (CHCl<sub>3</sub>, HPLC grade, stabilized with about 50 ppm amylene), dichloromethane (DCM, HPLC grade, stabilized with about 50 ppm amylene), and diethyl ether (Et<sub>2</sub>O, AR grade) were purchased from RCI Labscan Ltd. *n*-Hexane (HPLC grade), *iso*-propanol (HPLC grade), ethyl acetate (HPLC grade), and methanol (MeOH, AR grade) were purchased from Scharlau BASIC Laboratory Chemicals. These solvents were directly used as received. <sup>1</sup>H, <sup>13</sup>C and <sup>19</sup>F NMR spectra were collected on a Bruker AV 400 MHz NMR spectrometer using residue solvent peaks as an internal standard (<sup>1</sup>H NMR: CDCl<sub>3</sub> at 7.26 ppm; <sup>13</sup>C NMR: CDCl<sub>3</sub> at 77.0 ppm). Mass spectra were collected on an Agilent GC/MS 5975C system, a MALDI Micro MX mass spectrometer, or an API QSTAR XL System. IR spectra were recorded on Bruker TENSOR 27 spectrometer and reported in terms of frequency of absorption (cm<sup>-1</sup>). Optical rotations were measured on JASCO P-2000 polarimeter with [α]<sup>D</sup> values reported in degrees; concentration (c) is in 10 mg/mL. The enantiomeric excess values were determined by chiral HPLC using an Agilent 1260 LC system with a Daicel CHIRALCEL OD-H column, or a Daicel CHIRALPAK AD-H or IC column. Unless otherwise noted, the racemic samples in this study were prepared using the racemic catalyst 1,1'-binaphthyl-2,2'-diyl hydrogenphosphate (20 mol%). The racemic samples of **3k-m**, **4f-g**, **4k-m** were prepared using the racemic **C5** as catalyst (10 mol%).

## II. Substrate Preparation

The sulfoxonium ylides were prepared according to the following modified literature procedures.<sup>1,2</sup>

### General Procedure A.<sup>1</sup>

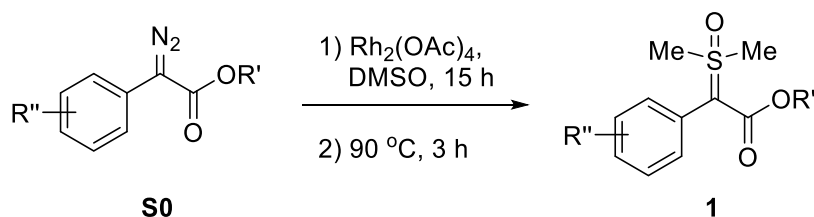

Under N<sub>2</sub>, to a 100-mL flame-dried Schlenk tube were added the  $\alpha$ -diazoester **S0** (10.0 mmol), and Rh<sub>2</sub>(OAc)<sub>4</sub> (110.5 mg, 0.25 mmol, 2.5 mol%) in anhydrous DMSO (*c* = 1.0 M). The reaction mixture was stirred at 25 °C for 15 h (or noted otherwise). Then, the reaction mixture was heated to 90 °C and stirred for additional 3 h at the same temperature before it was cooled to room temperature. Water (50 mL) was added to quench the reaction. The mixture was extracted with dichloromethane (50 mL  $\times$ 3), and the combined organic layers were washed with water (100 mL  $\times$ 3), dried over anhydrous Na<sub>2</sub>SO<sub>4</sub>, and concentrated. The residue was purified by flash column chromatography on silica gel to afford the desired sulfoxonium ylide **1**.

### General Procedure B.<sup>2</sup>

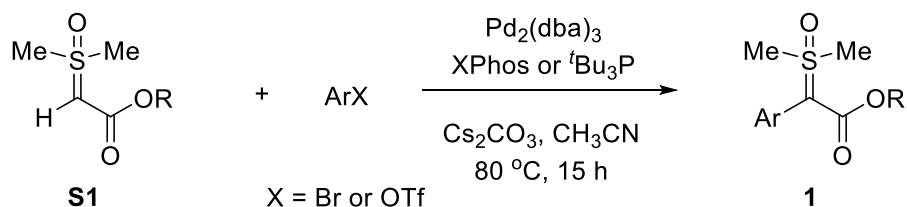

- (a) F. Dost, J. Gosselck, *Tetrahedron Lett.* **1970**, *58*, 5091–5093; (b) R. M. P. Dias, A. C. B. Burtoloso, *Org. Lett.* **2016**, *18*, 3034–3037.
- (a) C. Janot, P. Palamini, B. C. Dobson, J. Muir, C. Aïssa, *Org. Lett.* **2019**, *21*, 296–299; (b) C. Janot, J. B. Chagnoleau, N. R. Halcovitch, J. Muir, C. Aïssa, *J. Org. Chem.* **2020**, *85*, 1126–1137.

Under N<sub>2</sub>, to a 100-mL round-bottomed flask equipped with a magnetic stir bar were sequentially added Xphos (381 mg, 0.8 mmol, 20 mol%), Pd<sub>2</sub>(dba)<sub>3</sub> (183 mg, 0.2 mmol, 5 mol%), Cs<sub>2</sub>CO<sub>3</sub> (1.4 g, 4.4 mmol, 1.1 equiv), and anhydrous CH<sub>3</sub>CN (10 mL). The resulting mixture was stirred at room temperature for 10 min followed by addition of the aryl bromide or triflate (4.0 mmol, 1.0 equiv) and the sulfoxonium ylide **S1** (10 mmol, 2.5 equiv). The mixture was then heated with stirring at 80 °C. Upon completion (~ 15 h), the reaction mixture was cooled to room temperature and filtered through a short plug of silica gel, which was washed with DCM/MeOH (*v/v* = 50:1, 50 mL). The filtrate was concentrated, and the residue was purified by flash column chromatography on silica gel to afford the desired product **1**. In some cases, further crystallization was performed to remove the phosphine and/or phosphine oxide impurities, which was specified below.

#### General Procedure C.<sup>2</sup>

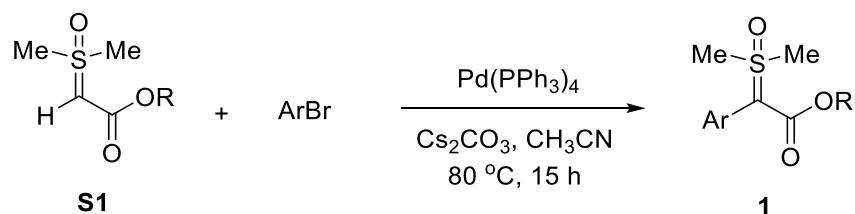

This procedure is essentially identical to the General Procedure B except that Pd(PPh<sub>3</sub>)<sub>4</sub> was used in place of Xphos or *t*Bu<sub>3</sub>P and Pd<sub>2</sub>(dba)<sub>3</sub>. After purification of the crude product by flash column chromatography on silica gel, further purification was needed to remove the phosphine and/or phosphine oxide impurities.

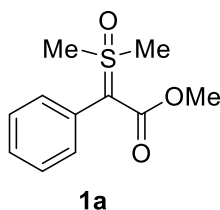

**Methyl 2-(dimethyl(oxo)-λ<sup>6</sup>-sulfanylidene)-2-phenylacetate (1a)** was prepared as a white solid according to the General Procedure A (eluent: DCM/MeOH = 50:1, 1.8 g,

80% yield).

$^1\text{H NMR}$  (400 MHz,  $\text{CDCl}_3$ )  $\delta$  7.37 – 7.29 (m, 5H), 3.63 (s, 3H), 3.43 (s, 6H) ppm.

It's a known compound, and the spectral data is consistent with the literature report.<sup>1b</sup>

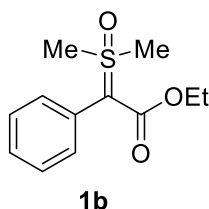

**Ethyl 2-(dimethyl(oxo)- $\lambda^6$ -sulfanylidene)-2-phenylacetate (1b)** was prepared as a light brown solid according to the General Procedure A (eluent: DCM/MeOH = 50:1, 1.5 g, 62% yield).

$^1\text{H NMR}$  (400 MHz,  $\text{CDCl}_3$ )  $\delta$  7.34 – 7.24 (m, 5H), 4.12 (q,  $J = 7.1$  Hz, 2H), 3.42 (s, 6H), 1.21 (t,  $J = 7.1$  Hz, 3H) ppm.

It's a known compound, and the spectral data is consistent with the literature report.<sup>2a</sup>

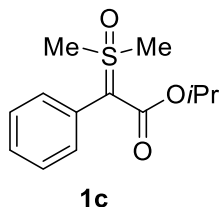

**Isopropyl 2-(dimethyl(oxo)- $\lambda^6$ -sulfanylidene)-2-phenylacetate (1c)** was prepared as a light orange-brown solid according to the General Procedure A (eluent: DCM/MeOH = 50:1, 1.0 g, 40% yield).

$^1\text{H NMR}$  (400 MHz,  $\text{CDCl}_3$ )  $\delta$  7.31 – 7.21 (m, 5H), 5.06 – 4.97 (m, 1H), 3.40 (s, 6H), 1.19 (d,  $J = 6.2$  Hz, 6H) ppm.

It's a known compound, and the spectral data is consistent with the literature report.<sup>3</sup>

---

3 H. Y. Zhang, J. Huang, S. D. Yang, *Chin. J. Org. Chem.* **2015**, *35*, 1961–1965.

Substrate **1d** was prepared according to the following procedure.<sup>4</sup>

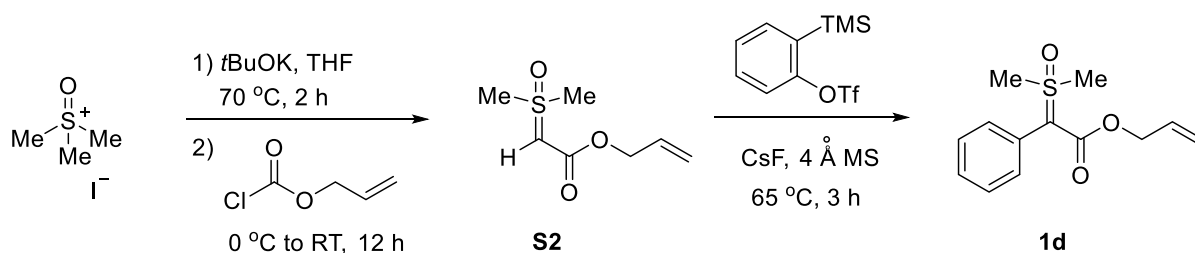

**Allyl 2-(dimethyl(oxo)- $\lambda^6$ -sulfanylidene)acetate (**S2**).** Under N<sub>2</sub> atmosphere, to a 250-mL flame-dried round-bottomed flask charged with *t*BuOK (5.6 g, 49.8 mmol, 3.0 equiv) and dry THF (150 mL) was added trimethylsulfoxonium iodide (11.0 g, 49.8 mmol, 3.0 equiv) in one portion. The resulted suspension was heated at 70 °C for 2 h before it was cooled to 0 °C. Next, allyl chloroformate (2.0 g, 16.6 mmol, 1.0 equiv) was slowly added. The reaction mixture was warmed to room temperature and stirred for additional 12 h. The mixture was filtered through a plug of celite and the filtrate was concentrated under reduced pressure. The residue was purified by flash column chromatography on silica gel (eluent: DCM/MeOH = 50:1) to form **S2** as a colorless oil (2.3 g, 79% yield).

<sup>1</sup>H NMR (400 MHz, CDCl<sub>3</sub>)  $\delta$  5.99 – 5.89 (m, 1H), 5.33 – 5.27 (m, 1H), 5.20 – 5.17 (m, 1H), 4.55 (d, *J* = 5.5 Hz, 2H), 4.02 (br, 1H), 3.40 (s, 6H) ppm.

<sup>13</sup>C NMR (100 MHz, CDCl<sub>3</sub>)  $\delta$  166.7, 133.6, 117.1, 63.4, 55.6, 42.3 ppm.

IR (thin film) 3089, 3017, 2931, 1632, 1377, 1323, 1131, 1017 cm<sup>-1</sup>.

HRMS (CI<sup>+</sup>) Calcd for C<sub>7</sub>H<sub>13</sub>O<sub>3</sub>S [M+H]<sup>+</sup>: 177.0585, found: 177.0583.

**Allyl 2-(dimethyl(oxo)- $\lambda^6$ -sulfanylidene)-2-phenylacetate (**1d**).** Under N<sub>2</sub>, to a 100-mL single-neck round-bottom flask were added the sulfoxonium ylide **S2** (1.8 g, 10 mmol, 1.0 equiv), activated 4 Å MS (1.8 g), anhydrous CsF (6.1 g, 40 mmol, 4.0 equiv), and anhydrous CH<sub>3</sub>CN (20 mL). Under vigorously stirring, the mixture was heated at 65 °C. Then, 2-(trimethylsilyl)phenyl trifluoromethanesulfonate (4.5 g, 15 mmol, 1.5 equiv) was added in three portions at intervals of 1 h (3 h in total at 65 °C). The mixture

4 Talero, B. S. Martins, A. C. B. Burtoloso, *Org. Lett.* **2018**, *20*, 7206–7211.

was cooled to room temperature and filtered through a short plug of celite, which was washed with dichloromethane (50 mL). The combined filtrate was concentrated under reduced pressure, and the crude product was purified by flash column chromatography on silica gel to give the desired product **1d** as a light orange-brown solid (eluent: *n*-hexane/ethyl acetate = 2:3, 0.9 g, 36% yield).

<sup>1</sup>H NMR (400 MHz, CDCl<sub>3</sub>) δ 7.31 – 7.22 (m, 5H), 5.92 – 5.82 (m, 1H), 5.18 – 5.07 (m, 2H), 4.55 (d, *J* = 4.4 Hz, 2H), 3.34 (s, 6H) ppm.

<sup>13</sup>C NMR (100 MHz, CDCl<sub>3</sub>) δ 165.7, 133.74, 133.69, 132.6, 128.4, 127.1, 116.2, 70.8, 63.4, 43.0 ppm.

IR (thin film) 3027, 2929, 1738, 1624, 1319, 1213, 1092, 1008 cm<sup>-1</sup>.

HRMS (CI+) Calcd for C<sub>13</sub>H<sub>16</sub>NaO<sub>3</sub>S [M+Na]<sup>+</sup>: 275.0718, found: 275.0725.

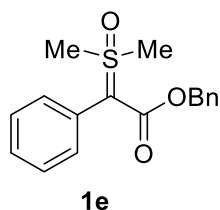

**Benzyl 2-(dimethyl(oxo)-λ<sup>6</sup>-sulfanylidene)-2-phenylacetate (1e)** was prepared as a light brown solid according to the General Procedure A (eluent: DCM/MeOH = 50:1, 2.1 g, 70% yield).

<sup>1</sup>H NMR (400 MHz, CDCl<sub>3</sub>) δ 7.38 – 7.24 (m, 10H), 5.15 (s, 2H), 3.41 (s, 6H) ppm.

It's a known compound, and the spectral data is consistent with the literature report.<sup>[3]</sup>

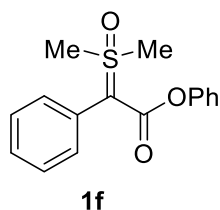

**Phenyl 2-(dimethyl(oxo)-λ<sup>6</sup>-sulfanylidene)-2-phenylacetate (1f)** was prepared as a white solid according to the General Procedure A (eluent: *n*-hexane/ethyl acetate = 2:3, 2.3 g, 78% yield).

$^1\text{H NMR}$  (400 MHz,  $\text{CDCl}_3$ )  $\delta$  7.48 – 7.45 (m, 2H), 7.41 – 7.30 (m, 5H), 7.18 – 7.14 (m, 1H), 7.12 – 7.10 (m, 2H), 3.43 (s, 6H) ppm.

It's a known compound, and the spectral data is consistent with the literature report.<sup>2a</sup>

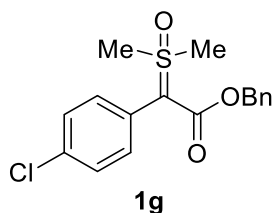

**Benzyl 2-(4-chlorophenyl)-2-(dimethyl(oxo)- $\lambda^6$ -sulfanylidene)acetate (1g)** was prepared as a white solid according to the General Procedure B (eluent: *n*-hexane/ethyl acetate = 2:3, 420 mg, 62% yield after a single recrystallization from *n*-pentane/ethyl acetate (*v/v* = 20:1)).

$^1\text{H NMR}$  (400 MHz,  $\text{CDCl}_3$ )  $\delta$  7.33 – 7.27 (m, 9H), 5.14 (s, 2H), 3.38 (s, 6H) ppm.

$^{13}\text{C NMR}$  (100 MHz,  $\text{CDCl}_3$ )  $\delta$  165.5, 137.6, 134.8, 132.8, 131.0, 128.5, 128.4, 127.5, 127.3, 69.3, 64.5, 43.2 ppm.

**IR** (thin film) 3047, 2936, 1632, 1320, 1214, 1086, 1013  $\text{cm}^{-1}$ .

**HRMS** (CI+) Calcd for  $\text{C}_{17}\text{H}_{18}\text{ClO}_3\text{S}$   $[\text{M}+\text{H}]^+$ : 337.0665, found: 337.0664.

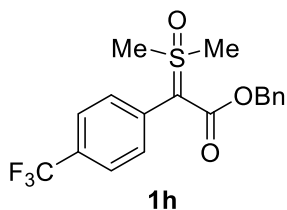

**Benzyl 2-(dimethyl(oxo)- $\lambda^6$ -sulfanylidene)-2-(4-(trifluoromethyl)phenyl)acetate (1h)** was prepared as a light yellow solid according to the General Procedure B (eluent: *n*-hexane/ethyl acetate = 2:3, 1.3 g, 87% yield).

$^1\text{H NMR}$  (400 MHz,  $\text{CDCl}_3$ )  $\delta$  7.58 (d,  $J$  = 8.2 Hz, 2H), 7.48 (d,  $J$  = 8.2 Hz, 2H), 7.37 – 7.28 (m, 5H), 5.17 (s, 2H), 3.45 (s, 6H) ppm.

$^{13}\text{C NMR}$  (100 MHz,  $\text{CDCl}_3$ )  $\delta$  165.2, 137.4, 136.4, 133.0, 128.4, 128.1 (q,  $^2J_{\text{C-F}}$  = 32.2 Hz), 127.6, 127.4, 125.0 (q,  $^3J_{\text{C-F}}$  = 3.6 Hz), 124.4 (q,  $^1J_{\text{C-F}}$  = 270.3 Hz), 69.3, 64.7, 43.5 ppm.



$^{19}\text{F}$  NMR (376 MHz,  $\text{CDCl}_3$ )  $\delta$  -62.2 ppm.

IR (thin film) 3038, 2941, 1622, 1393, 1320, 1216, 1117, 1013  $\text{cm}^{-1}$ .

HRMS (CI+) Calcd for  $\text{C}_{18}\text{H}_{18}\text{F}_3\text{O}_3\text{S}$   $[\text{M}+\text{H}]^+$ : 371.0929, found: 371.0930.

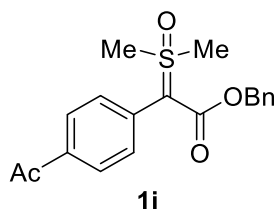

**Benzyl 2-(4-acetylphenyl)-2-(dimethyl(oxo)- $\lambda^6$ -sulfanylidene)acetate (1i)** was prepared as a light brown solid according to the general procedure B (eluent: *n*-hexane/ethyl acetate = 2:3, 0.8 g, 57% yield).

$^1\text{H}$  NMR (400 MHz,  $\text{CDCl}_3$ )  $\delta$  7.87 (d,  $J$  = 8.2 Hz, 2H), 7.43 (d,  $J$  = 8.2 Hz, 2H), 7.33 – 7.25 (m, 5H), 5.14 (s, 2H), 3.43 (s, 6H), 2.56 (s, 3H) ppm.

$^{13}\text{C}$  NMR (100 MHz,  $\text{CDCl}_3$ )  $\delta$  197.8, 165.1, 138.2, 137.4, 134.6, 132.4, 128.4, 128.1, 127.6, 127.4, 70.1, 64.7, 43.5, 26.6 ppm.

IR (thin film) 3029, 2931, 1604, 1399, 1314, 1196, 1075, 1009  $\text{cm}^{-1}$ .

HRMS (CI+) Calcd for  $\text{C}_{19}\text{H}_{21}\text{O}_4\text{S}$   $[\text{M}+\text{H}]^+$ : 345.1161, found: 345.1163.

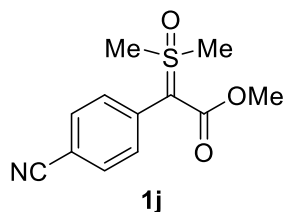

**Methyl 2-(4-cyanophenyl)-2-(dimethyl(oxo)- $\lambda^6$ -sulfanylidene)acetate (1j)** was prepared as a white solid according to the General Procedure A (eluent: DCM/MeOH = 50:1, 1.2 g, 48% yield).

$^1\text{H}$  NMR (400 MHz,  $\text{CDCl}_3$ )  $\delta$  7.58 – 7.56 (m, 2H), 7.43 – 7.41 (m, 2H), 3.66 (s, 3H), 3.52 (s, 6H) ppm.

$^{13}\text{C}$  NMR (100 MHz,  $\text{CDCl}_3$ )  $\delta$  165.7, 137.7, 132.5, 131.6, 119.3, 108.9, 68.5, 50.6, 43.9 ppm.

IR (thin film) 3031, 2998, 2225, 1711, 1622, 1504, 1428, 1338, 1217, 1087  $\text{cm}^{-1}$ .

HRMS (CI+) Calcd for  $\text{C}_{12}\text{H}_{13}\text{NNaO}_3\text{S}$   $[\text{M}+\text{Na}]^+$ : 274.0514, found: 274.0521.

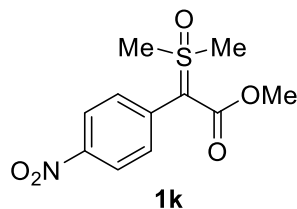

**Methyl 2-(dimethyl(oxo)- $\lambda^6$ -sulfanylidene)-2-(4-nitrophenyl)acetate (1k)** was prepared as a yellow solid according to the General Procedure A (eluent: DCM/MeOH = 50:1, 0.8 g, 30% yield).

$^1\text{H NMR}$  (400 MHz,  $\text{CDCl}_3$ )  $\delta$  8.15 (d,  $J = 8.9$  Hz, 2H), 7.48 (d,  $J = 8.9$  Hz, 2H), 3.69 (s, 3H), 3.56 (s, 6H) ppm.

$^{13}\text{C NMR}$  (100 MHz,  $\text{CDCl}_3$ )  $\delta$  165.7, 145.1, 140.0, 131.9, 123.1, 68.4, 50.7, 44.1 ppm.

IR (thin film) 3022, 2942, 1711, 1627, 1506, 1429, 1324, 1214, 1095, 1016  $\text{cm}^{-1}$ .

HRMS (CI+) Calcd for  $\text{C}_{11}\text{H}_{14}\text{NO}_5\text{S}$   $[\text{M}+\text{H}]^+$ : 272.0593, found: 272.0598.

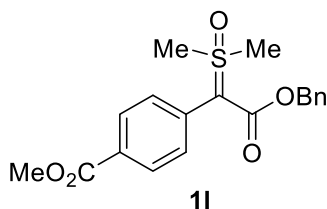

**Methyl 4-(2-(benzyloxy)-1-(dimethyl(oxo)- $\lambda^6$ -sulfanylidene)-2-oxoethyl)benzoate (1l)** was prepared as a white solid according to the General Procedure A (eluent: DCM/MeOH = 50:1, 2.7 g, 75% yield).

$^1\text{H NMR}$  (400 MHz,  $\text{CDCl}_3$ )  $\delta$  7.99 – 7.97 (m, 2H), 7.45 – 7.42 (m, 2H), 7.35 – 7.28 (m, 5H), 5.16 (s, 2H), 3.92 (s, 3H), 3.48 (s, 6H) ppm.

$^{13}\text{C NMR}$  (100 MHz,  $\text{CDCl}_3$ )  $\delta$  167.1, 165.2, 137.7, 137.4, 132.4, 129.3, 128.4, 127.7, 127.6, 127.4, 69.9, 64.7, 52.0, 43.6 ppm.

IR (thin film) 3028, 2942, 1714, 1607, 1436, 1282, 1187, 1098, 1012  $\text{cm}^{-1}$ .

HRMS (CI+) Calcd for  $\text{C}_{19}\text{H}_{21}\text{O}_5\text{S}$   $[\text{M}+\text{H}]^+$ : 361.1110, found: 361.1111.

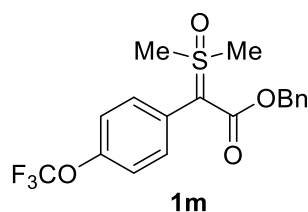

**Benzyl 2-(dimethyl(oxo)- $\lambda^6$ -sulfanylidene)-2-(4-(trifluoromethoxy)phenyl)acetate (1m)** was prepared as a light brown solid according to the General Procedure B (eluent: *n*-hexane/ethyl acetate = 2:3, 1.7 g, 43% yield).

$^1\text{H NMR}$  (400 MHz,  $\text{CDCl}_3$ )  $\delta$  7.40 – 7.34 (m, 2H), 7.33 – 7.27 (m, 5H), 7.19 – 7.17 (m, 2H), 5.15 (s, 2H), 3.42 (s, 6H) ppm.

$^{13}\text{C NMR}$  (100 MHz,  $\text{CDCl}_3$ )  $\delta$  165.5, 148.0, 137.5, 134.8, 131.1, 128.4, 127.5, 127.3, 120.6, 120.5 (q,  $^1J_{\text{C-F}} = 255.6$  Hz), 68.9, 64.6, 43.3 ppm.

$^{19}\text{F NMR}$  (376 MHz,  $\text{CDCl}_3$ )  $\delta$  -57.7 ppm.

**IR** (thin film) 3041, 2934, 1632, 1502, 1217, 1085, 1013  $\text{cm}^{-1}$ .

**HRMS** (CI+) Calcd for  $\text{C}_{18}\text{H}_{18}\text{F}_3\text{O}_4\text{S}$   $[\text{M}+\text{H}]^+$ : 387.0878, found: 387.0877.

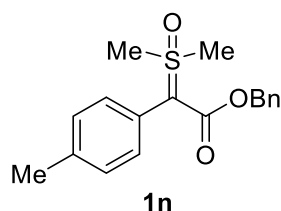

**Benzyl 2-(dimethyl(oxo)- $\lambda^6$ -sulfanylidene)-2-(*p*-tolyl)acetate (1n)** was prepared as a white solid according to the General Procedure A, except that the reaction was run at room temperature (eluent: *n*-hexane/ethyl acetate = 2:3, 1.6 g, 50% yield).

Note: It was found that sulfoxonium ylides bearing an electron-donating group (such as methyl group) are not stable when prepared at a higher temperature. Therefore, the reaction temperature in General Procedure A was slightly modified for a better isolated yield.

$^1\text{H NMR}$  (400 MHz,  $\text{CDCl}_3$ )  $\delta$  7.33 – 7.22 (m, 7H), 7.15 (d,  $J = 7.8$  Hz, 2H), 5.14 (s, 2H), 3.35 (s, 6H), 2.38 (s, 3H) ppm.

$^{13}\text{C}$  NMR (100 MHz,  $\text{CDCl}_3$ )  $\delta$  165.3, 137.3, 136.4, 133.1 (2C), 128.6, 127.7, 126.7, 126.6, 69.7, 63.7, 42.3, 20.6 ppm.

IR (thin film) 3025, 2929, 1707, 1628, 1506, 1375, 1322, 1214, 1173, 1081, 1015  $\text{cm}^{-1}$ .

HRMS (CI+) Calcd for  $\text{C}_{18}\text{H}_{21}\text{O}_3\text{S}$   $[\text{M}+\text{H}]^+$ : 317.1211, found: 317.1214.

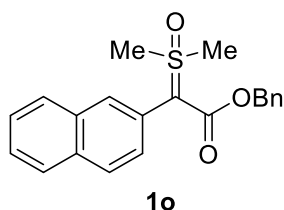

**Benzyl 2-(dimethyl(oxo)- $\lambda^6$ -sulfanylidene)-2-(naphthalen-2-yl)acetate (1o)** was prepared as a white solid according to the General Procedure B (eluent: *n*-hexane/ethyl acetate = 2:3, 840 mg, 57% yield) after a single recrystallization from *n*-pentane/ethyl acetate (20:1, *v/v*).

$^1\text{H}$  NMR (400 MHz,  $\text{CDCl}_3$ )  $\delta$  7.86 – 7.81 (m, 4H), 7.51 – 7.46 (m, 3H), 7.33 – 7.23 (m, 5H), 5.18 (s, 2H), 3.45 (s, 6H) ppm.

$^{13}\text{C}$  NMR (100 MHz,  $\text{CDCl}_3$ )  $\delta$  165.8, 137.7, 133.5, 132.4, 131.9, 131.8, 130.0, 128.3, 127.9, 127.8, 127.6, 127.4, 127.3, 126.00, 125.95, 71.0, 64.5, 43.2 ppm.

IR (thin film) 3043, 2943, 1737, 1630, 1378, 1311, 1193, 1087, 1016  $\text{cm}^{-1}$ .

HRMS (CI+) Calcd for  $\text{C}_{21}\text{H}_{20}\text{NaO}_3\text{S}$   $[\text{M}+\text{Na}]^+$ : 375.1031, found: 375.1039.

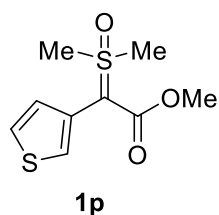

**Methyl 2-(dimethyl(oxo)- $\lambda^6$ -sulfanylidene)-2-(thiophen-3-yl)acetate (1p)** was prepared as a white solid according to the General Procedure A, except that the reaction was run at room temperature for 1.5 h (eluent: *n*-hexane/ethyl acetate = 2:3, 600 mg, 26% yield).

$^1\text{H}$  NMR (400 MHz,  $\text{CD}_2\text{Cl}_2$ )  $\delta$  7.34 – 7.32 (m, 1H), 7.19 – 7.18 (m, 1H), 7.03 – 7.01 (m,

<sup>1</sup>H), 3.61 (s, 3H), 3.40 (s, 6H) ppm.

<sup>13</sup>C NMR (100 MHz, CD<sub>2</sub>Cl<sub>2</sub>) δ 166.2, 132.1, 132.0, 125.8, 124.4, 64.3, 50.1, 42.6 ppm.

IR (thin film) 3030, 2944, 1711, 1629, 1303, 1195, 1017 cm<sup>-1</sup>.

HRMS (CI<sup>+</sup>) Calcd for C<sub>9</sub>H<sub>12</sub>NaO<sub>3</sub>S<sub>2</sub> [M+Na]<sup>+</sup>: 255.0126, found: 255.0123.

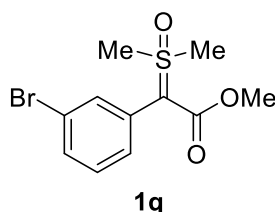

**Methyl 2-(3-bromophenyl)-2-(dimethyl(oxo)-λ<sup>6</sup>-sulfanylidene)acetate (1q)** was prepared as a white solid according to the General Procedure C (eluent: *n*-hexane/ethyl acetate = 2:3, 400 mg, 33% yield after a single recrystallization from *n*-pentane/ethyl acetate (20:1, *v/v*).

<sup>1</sup>H NMR (400 MHz, CDCl<sub>3</sub>) δ 7.47 (s, 1H), 7.38 – 7.36 (m, 1H), 7.25 – 7.16 (m, 2H), 3.61 (s, 3H), 3.42 (m, 6H) ppm.

<sup>13</sup>C NMR (100 MHz, CDCl<sub>3</sub>) δ 166.2, 136.2, 134.5, 132.0, 129.9, 129.7, 122.0, 69.2, 50.5, 43.2 ppm.

IR (thin film) 3019, 2943, 1632, 1431, 1327, 1221, 1176, 1087, 1021cm<sup>-1</sup>.

HRMS (CI<sup>+</sup>) Calcd for C<sub>11</sub>H<sub>14</sub>BrO<sub>3</sub>S [M+H]<sup>+</sup>: 304.9847, found: 304.9850.

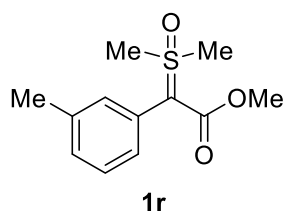

**Methyl 2-(dimethyl(oxo)-λ<sup>6</sup>-sulfanylidene)-2-(*m*-tolyl)acetate (1r)** was prepared as a white solid according to the General Procedure A, except that the reaction was run at room temperature (eluent: DCM/MeOH = 50:1, 630 mg, 26% yield).

<sup>1</sup>H NMR (400 MHz, CDCl<sub>3</sub>) δ 7.28 – 7.19 (m, 1H), 7.12 – 7.06 (m, 3H), 3.59 (s, 3H), 3.35 (s, 6H), 2.33 (s, 3H) ppm.

$^{13}\text{C}$  NMR (100 MHz,  $\text{CDCl}_3$ )  $\delta$  166.7, 138.0, 134.5, 132.4, 130.8, 128.4, 128.2, 70.7, 50.4, 42.9, 21.4 ppm.

IR (thin film) 3046, 2942, 1630, 1434, 1327, 1239, 1177, 1092, 1023  $\text{cm}^{-1}$ .

HRMS (CI+) Calcd for  $\text{C}_{12}\text{H}_{16}\text{NaO}_3\text{S}$   $[\text{M}+\text{Na}]^+$ : 263.0718, found: 263.0721.

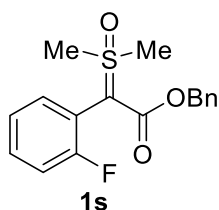

**Benzyl 2-(dimethyl(oxo)- $\lambda^6$ -sulfanylidene)-2-(2-fluorophenyl)acetate (1s)** was prepared as a white solid according to the General Procedure A (eluent: *n*-hexane/ethyl acetate = 2:3, 2.0 g, 63% yield).

$^1\text{H}$  NMR (400 MHz,  $\text{CDCl}_3$ )  $\delta$  7.42 – 7.26 (m, 7H), 7.16 – 7.07 (m, 2H), 5.14 (s, 2H), 3.44 (br, 6H) ppm.

$^{13}\text{C}$  NMR (100 MHz,  $\text{CDCl}_3$ )  $\delta$  165.8, 162.2 (d,  $^1J_{\text{C-F}} = 242.6$  Hz), 137.8, 136.97, 136.96, 129.6 (d,  $^3J_{\text{C-F}} = 8.5$  Hz), 128.3, 127.3, 127.0, 124.0, 115.5 (d,  $^2J_{\text{C-F}} = 23.4$  Hz), 77.3, 64.4, 42.8 ppm.

$^{19}\text{F}$  NMR (376 MHz,  $\text{CDCl}_3$ )  $\delta$  -110.6 ppm.

IR (thin film) 3026, 2934, 1742, 1626, 1327, 1208, 1087  $\text{cm}^{-1}$ .

HRMS (CI+) Calcd for  $\text{C}_{17}\text{H}_{18}\text{FO}_3\text{S}$   $[\text{M}+\text{H}]^+$ : 321.0961, found: 321.0966.

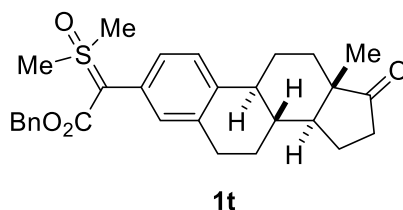

**Benzyl 2-(dimethyl(oxo)- $\lambda^6$ -sulfanylidene)-2-((8*R*,9*S*,13*S*,14*S*)-13-methyl-17-oxo-7,8,9,11,12,13,14,15,16,17-decahydro-6*H*-cyclopenta[*a*]phenanthren-3-yl)acetate (1t)** was prepared as a light yellow solid at 0.6-mmol scale according to the General Procedure B (eluent: *n*-hexane/ethyl acetate = 2:3, 205 mg, 71% yield).

$^1\text{H NMR}$  (400 MHz,  $\text{CDCl}_3$ )  $\delta$  7.36 – 7.22 (m, 6H), 7.11 – 7.08 (m, 2H), 5.13 (s, 2H), 3.39 (s, 3H), 3.37 (s, 3H), 2.91 – 2.88 (m, 2H), 2.58 – 2.39 (m, 2H), 2.32 – 2.27 (m, 1H), 2.18 – 1.93 (m, 4H), 1.66 – 1.42 (m, 6H), 0.91 (s, 3H) ppm.

$^{13}\text{C NMR}$  (100 MHz,  $\text{CDCl}_3$ )  $\delta$  221.0, 165.9, 138.7, 138.0, 136.4, 134.2, 131.0, 129.7, 128.3, 127.4, 127.3, 125.4, 70.3, 64.3, 50.5, 48.0, 44.4, 43.13, 43.09, 38.0, 35.9, 31.6, 29.3, 26.6, 25.6, 21.6, 13.9 ppm.

**IR** (thin film) 3026, 2934, 2871, 1732, 1626, 1496, 1450, 1383, 1326, 1226, 1171, 1084, 1019, 906  $\text{cm}^{-1}$ .

**HRMS** (CI+) Calcd for  $\text{C}_{29}\text{H}_{35}\text{O}_4\text{S}$   $[\text{M}+\text{H}]^+$ : 479.2256, found: 479.2252.

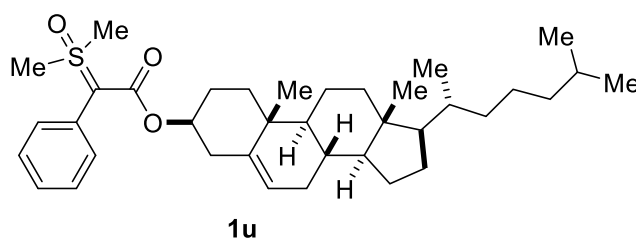

**(3*S*,8*S*,9*S*,10*R*,13*R*,14*S*,17*R*)-10,13-dimethyl-17-((*R*)-6-methylheptan-2-yl)-2,3,4,7,8,9,10,11,12,13,14,15,16,17-tetradecahydro-1*H*-cyclopenta[*a*]phenanthren-3-yl 2-(dimethyl(oxo)-λ<sup>6</sup>-sulfanylidene)-2-phenylacetate (1u)** was prepared as a white foam according to the General Procedure B (eluent: *n*-hexane/ethyl acetate = 2:3, 929 mg, 40% yield).

$^1\text{H NMR}$  (400 MHz,  $\text{CDCl}_3$ )  $\delta$  7.30 – 7.20 (m, 5H), 5.35 (s, 1H), 4.62 – 4.56 (m, 1H), 3.38 (s, 6H), 2.34 – 2.31 (m, 1H), 2.24 – 2.18 (m, 1H), 2.01 – 1.93 (m, 2H), 1.83 – 1.80 (m, 3H), 1.60 – 1.44 (m, 6H), 1.42 – 1.30 (m, 4H), 1.28 – 1.24 (m, 1H), 1.19 – 1.01 (m, 9H), 0.96 – 0.94 (m, 4H), 0.91 (d,  $J = 6.4$  Hz, 3H), 0.87 – 0.85 (m, 6H), 0.67 (s, 3H) ppm.

It's a known compound, and the spectral data is consistent with the literature report.<sup>5</sup>

5 H. He, K. Yan, J. Li, R. Lai, Y. Luo, M. Guan, Y. Wu, *Synthesis*, **2020**, 52, 3065–3070.

### III. Catalytic Asymmetric Synthesis of Chiral $\alpha$ -Amino Esters

Table S1. Screening of CPAs for the N-H Insertion Reaction.

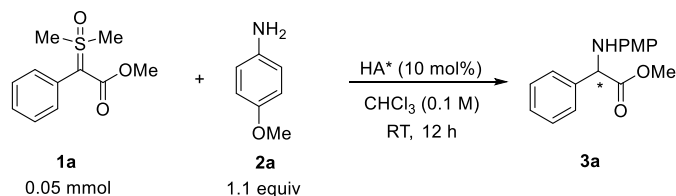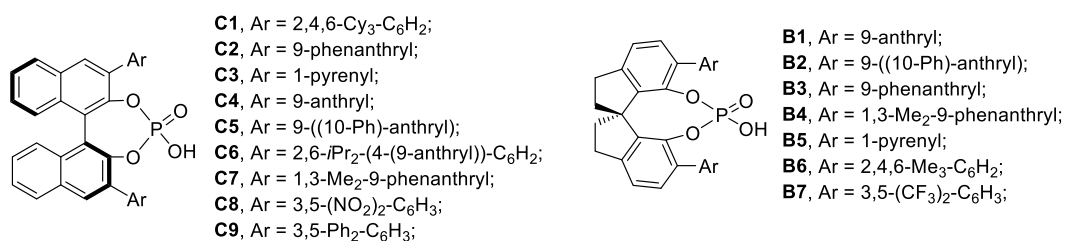

| entry | HA*            | solvent           | T/°C | t      | Conv. (%) <sup>a</sup> | ee (%) <sup>b</sup> |
|-------|----------------|-------------------|------|--------|------------------------|---------------------|
| 1     | (S)- <b>C1</b> | CHCl <sub>3</sub> | 25   | 12 h   | 50                     | (+)-3               |
| 2     | (S)- <b>C2</b> | CHCl <sub>3</sub> | 25   | 6 h    | >95                    | (+)-20              |
| 3     | (S)- <b>C3</b> | CHCl <sub>3</sub> | 25   | 6 h    | >95                    | (+)-21              |
| 4     | (S)- <b>C4</b> | CHCl <sub>3</sub> | 25   | 15 min | >95                    | (+)-54              |
| 5     | (S)- <b>C5</b> | CHCl <sub>3</sub> | 25   | 15 min | >95                    | (+)-79              |
| 6     | (S)- <b>C6</b> | CHCl <sub>3</sub> | 25   | 12 h   | 52                     | (+)-22              |
| 7     | (S)- <b>C7</b> | CHCl <sub>3</sub> | 25   | 6 h    | >95                    | (+)-28              |
| 8     | (S)- <b>C8</b> | CHCl <sub>3</sub> | 25   | 6 h    | >95                    | (+)-13              |
| 9     | (S)- <b>C9</b> | CHCl <sub>3</sub> | 25   | 6 h    | >95                    | (+)-10              |
| 10    | (R)- <b>B1</b> | CHCl <sub>3</sub> | 25   | 12 h   | 63                     | (-)-27              |
| 11    | (R)- <b>B2</b> | CHCl <sub>3</sub> | 25   | 12 h   | 49                     | (+)-4               |
| 12    | (R)- <b>B3</b> | CHCl <sub>3</sub> | 25   | 12 h   | 70                     | (-)-63              |
| 13    | (R)- <b>B4</b> | CHCl <sub>3</sub> | 25   | 12 h   | 75                     | (-)-49              |
| 14    | (R)- <b>B5</b> | CHCl <sub>3</sub> | 25   | 12 h   | 81                     | (-)-67              |
| 15    | (R)- <b>B6</b> | CHCl <sub>3</sub> | 25   | 12 h   | <20                    | (-)-4               |
| 16    | (R)- <b>B7</b> | CHCl <sub>3</sub> | 25   | 12 h   | 78                     | (-)-23              |

<sup>a</sup> Determined by crude <sup>1</sup>H NMR analysis. <sup>b</sup> Determined by chiral HPLC analysis.



**Table S2. Screening of Solvents for the N-H Insertion Reaction.**

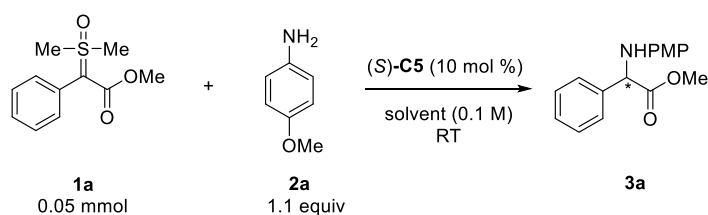

| entry | HA*    | solvent            | T/°C | t      | Conv. (%) <sup>a</sup> | ee (%) <sup>b</sup> |
|-------|--------|--------------------|------|--------|------------------------|---------------------|
| 1     | (S)-C5 | CHCl <sub>3</sub>  | 25   | 15 min | >95                    | (+)-79              |
| 2     | (S)-C5 | DCM                | 25   | 15 min | >95                    | (+)-90              |
| 3     | (S)-C5 | DCE                | 25   | 15 min | >95                    | (+)-88              |
| 4     | (S)-C5 | toluene            | 25   | 14 h   | >95                    | (+)-75              |
| 5     | (S)-C5 | Ph-Cl              | 25   | 14 h   | >95                    | (+)-79              |
| 6     | (S)-C5 | Ph-CF <sub>3</sub> | 25   | 14 h   | <20 <sup>c</sup>       | (+)-68              |
| 7     | (S)-C5 | THF                | 25   | 14 h   | 82                     | (+)-80              |
| 8     | (S)-C5 | MTBE               | 25   | 14 h   | <20 <sup>[c]</sup>     | (+)-67              |
| 9     | (S)-C5 | EtOAc              | 25   | 14 h   | >95                    | (+)-79              |
| 10    | (S)-C5 | CH <sub>3</sub> CN | 25   | 14 h   | 70                     | (+)-72              |

<sup>a</sup> Determined by crude <sup>1</sup>H NMR analysis. <sup>b</sup> Determined by Chiral HPLC analysis. <sup>c</sup> Poor solubility of sulfoxonium ylides in these solvents led to lower conversion.

### General Procedure D.

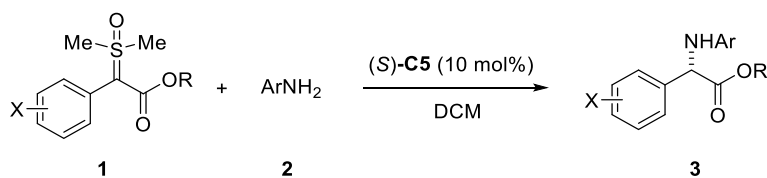

An oven-dried 4-mL vial equipped with a magnetic stirring bar was charged with the sulfoxonium ylide **1** (0.2 mmol, 1.0 equiv) and the CPA catalyst (S)-C5 (17 mg, 0.02 mmol, 10 mol%). The vial was carefully sealed with a puncturable screw-cap and electric tape before it was cooled to the specified temperature (either -10 °C or -15 °C

or room temperature). DCM (1.0 mL) was injected into the vial through the cap. The solution was stirred at the same temperature for 2 min before addition of the aniline **2** (0.22 mmol, 1.1 equiv). Then, the reaction mixture was stirred at the same temperature and the progress was monitored by TLC. Upon completion, the mixture was directly subjected to flash column chromatography on silica gel (eluent: *n*-hexane/ethyl acetate = 10:1 to 5:1) to give the desired product **3**.

*Note: 1) When the arylamine is a solid, all the reactants were directly added into the vial before cooling to the reaction temperature followed by addition of DCM.*

*2) All the products are bench-stable.*

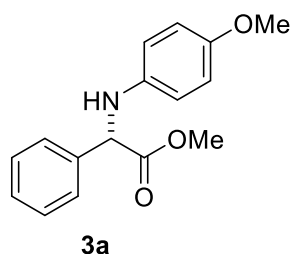

**Methyl (S)-2-((4-methoxyphenyl)amino)-2-phenylacetate (3a)** was prepared as a light yellow solid according to the General Procedure D (48 h at  $-10\text{ }^{\circ}\text{C}$ , eluent: *n*-hexane/EtOAc = 10:1, 50.5 mg, 93% yield, 95% ee).

$[\alpha]_{\text{D}}^{25}$ : +106.0 ( $c = 1.0$ ,  $\text{CH}_2\text{Cl}_2$ ). HPLC analysis of the product: Daicel CHIRALPAK<sup>®</sup> IC column; 5% *i*-PrOH in *n*-hexane; 1.0 mL/min; retention times: 16.9 min (major), 14.7 min (minor).

<sup>1</sup>H NMR (400 MHz,  $\text{CDCl}_3$ )  $\delta$  7.53 – 7.51 (m, 2H), 7.41 – 7.33 (m, 3H), 6.76 – 6.74 (m, 2H), 6.59 – 6.57 (m, 2H), 5.06 (s, 1H), 3.75 – 3.73 (m, 6H) ppm.

<sup>13</sup>C NMR (100 MHz,  $\text{CDCl}_3$ )  $\delta$  172.5, 152.6, 140.0, 137.7, 128.9, 128.3, 127.3, 114.93, 114.85, 61.8, 55.7, 52.8 ppm.

IR (thin film) 3402, 3028, 2938, 1740, 1624, 1512, 1445, 1315, 1225, 1182, 1089  $\text{cm}^{-1}$ .

HRMS (CI<sup>+</sup>) Calcd for  $\text{C}_{16}\text{H}_{17}\text{NO}_3$   $[\text{M}]^+$ : 271.1208, found: 271.1211.

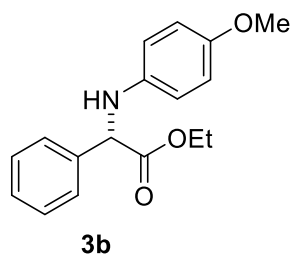

**Ethyl (S)-2-((4-methoxyphenyl)amino)-2-phenylacetate (3b)** was prepared as a light yellow oil according to the General Procedure D (48 h at  $-10\text{ }^{\circ}\text{C}$ , eluent: *n*-hexane/EtOAc = 10:1, 51.9 mg, 91% yield, 94% ee).

$[\alpha]_{\text{D}}^{25}$ : +103.5 ( $c = 1.0$ ,  $\text{CH}_2\text{Cl}_2$ ). HPLC analysis of the product: Daicel CHIRALPAK® IC column; 5% *i*-PrOH in *n*-hexane; 1.0 mL/min; retention times: 14.4 min (major), 13.0 min (minor).

$^1\text{H NMR}$  (400 MHz,  $\text{CD}_2\text{Cl}_2$ )  $\delta$  7.56 – 7.54 (m, 2H), 7.44 – 7.34 (m, 3H), 6.78 – 6.75 (m, 2H), 6.61 – 6.59 (m, 2H), 5.09 (s, 1H), 4.78 (br, 1H), 4.30 – 4.12 (m, 2H), 3.73 (s, 3H), 1.25 (t,  $J = 7.1$  Hz, 3H) ppm.

$^{13}\text{C NMR}$  (100 MHz,  $\text{CD}_2\text{Cl}_2$ )  $\delta$  171.9, 152.5, 140.3, 138.1, 128.7, 128.2, 127.3, 114.7, 114.6, 61.7, 61.5, 55.5, 13.8 ppm.

**IR** (thin film) 3405, 3031, 2985, 1736, 1513, 1307, 1237, 1185, 1029  $\text{cm}^{-1}$ .

**HRMS** (CI+) Calcd for  $\text{C}_{17}\text{H}_{19}\text{NO}_3$   $[\text{M}]^+$ : 285.1365, found: 285.1364.

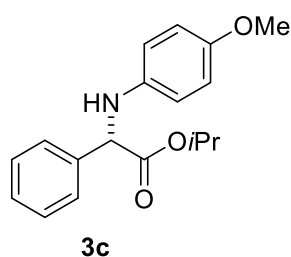

**Isopropyl (S)-2-((4-methoxyphenyl)amino)-2-phenylacetate (3c)** was prepared as a light yellow oil according to the General Procedure D (48 h at  $-10\text{ }^{\circ}\text{C}$ , eluent: *n*-hexane/EtOAc = 10:1, 49.7 mg, 83% yield, 86% ee).

$[\alpha]_{\text{D}}^{25}$ : +69.9 ( $c = 1.0$ ,  $\text{CH}_2\text{Cl}_2$ ). HPLC analysis of the product: Daicel CHIRALPAK® AD-H column; 20% *i*-PrOH in *n*-hexane; 1.0 mL/min; retention times: 9.6 min (major), 8.0 min (minor).

$^1\text{H NMR}$  (400 MHz,  $\text{CDCl}_3$ )  $\delta$  7.52 – 7.50 (m, 2H), 7.39 – 7.29 (m, 3H), 6.76 – 6.74 (m, 2H), 6.59 – 6.57 (m, 2H), 5.10 – 5.00 (m, 2H), 3.73 (s, 3H), 1.29 (d,  $J = 6.4$  Hz, 3H), 1.11 (d,  $J = 6.4$  Hz, 3H) ppm. (the proton of NH bond is not displayed)

$^{13}\text{C NMR}$  (100 MHz,  $\text{CDCl}_3$ )  $\delta$  171.5, 152.5, 140.1, 137.8, 128.7, 128.1, 127.2, 114.9, 114.8, 69.4, 61.9, 55.7, 21.8, 21.4 ppm.

**IR** (thin film) 3407, 3035, 2989, 1731, 1513, 1449, 1261, 1109, 1031  $\text{cm}^{-1}$ .

**HRMS** (CI+) Calcd for  $\text{C}_{18}\text{H}_{21}\text{NO}_3$   $[\text{M}]^+$ : 299.1521, found: 299.1535.

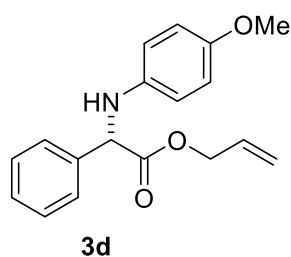

**Allyl (S)-2-((4-methoxyphenyl)amino)-2-phenylacetate (3d)** was prepared as a light yellow oil according to the General Procedure D (48 h at  $-10$  °C, eluent: *n*-hexane/EtOAc = 10:1, 56.5 mg, 95% yield, 96% ee).

$[\alpha]_{\text{D}}^{25}$ : +76.8 ( $c = 1.0$ ,  $\text{CH}_2\text{Cl}_2$ ). HPLC analysis of the product: Daicel CHIRALPAK<sup>®</sup> IC column; 5% *i*-PrOH in *n*-hexane; 1.0 mL/min; retention times: 13.8 min (major), 11.9 min (minor).

$^1\text{H NMR}$  (400 MHz,  $\text{CD}_2\text{Cl}_2$ )  $\delta$  7.56 – 7.54 (m, 2H), 7.44 – 7.35 (m, 3H), 6.78 – 6.74 (m, 2H), 6.62 – 6.58 (m, 2H), 5.94 – 5.84 (m, 1H), 5.23 – 5.18 (m, 2H), 5.13 (s, 1H), 4.78 (br, 1H), 4.71 – 4.61 (m, 2H), 3.73 (s, 3H) ppm.

$^{13}\text{C NMR}$  (100 MHz,  $\text{CD}_2\text{Cl}_2$ )  $\delta$  171.6, 152.6, 140.2, 138.0, 131.7, 128.8, 128.3, 127.3, 117.9, 114.70, 114.66, 65.9, 61.5, 55.5 ppm.

**IR** (thin film) 3405, 3045, 2942, 2839, 1737, 1512, 1452, 1306, 1233, 1178, 1031  $\text{cm}^{-1}$ .

**HRMS** (CI+) Calcd for  $\text{C}_{18}\text{H}_{20}\text{NO}_3$   $[\text{M}+\text{H}]^+$ : 298.1443, found: 298.1449.

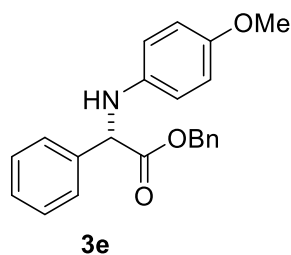

**Benzyl (S)-2-((4-methoxyphenyl)amino)-2-phenylacetate (3e)** was prepared as a light yellow solid according to the General Procedure D (48 h at  $-10\text{ }^{\circ}\text{C}$ , eluent: *n*-hexane/EtOAc = 10:1, 59.8 mg, 86% yield, 95% ee).

$[\alpha]_{\text{D}}^{25}$ : +63.5 ( $c = 1.0$ ,  $\text{CH}_2\text{Cl}_2$ ). HPLC analysis of the product: Daicel CHIRALPAK<sup>®</sup> IC column; 5% *i*-PrOH in *n*-hexane; 1.0 mL/min; retention times: 18.5 min (major), 14.1 min (minor).

$^1\text{H NMR}$  (400 MHz,  $\text{CD}_2\text{Cl}_2$ )  $\delta$  7.55 – 7.53 (m, 2H), 7.44 – 7.34 (m, 6H), 7.24 – 7.22 (m, 2H), 6.76 – 6.74 (m, 2H), 6.60 – 6.58 (m, 2H), 5.25 – 5.14 (m, 3H), 4.77 (d,  $J = 6.0$  Hz, 1H), 3.73 (s, 3H) ppm.

$^{13}\text{C NMR}$  (100 MHz,  $\text{CD}_2\text{Cl}_2$ )  $\delta$  171.8, 152.6, 140.2, 137.9, 135.6, 128.8, 128.5, 128.3, 128.2, 127.8, 127.3, 114.70, 114.68, 67.1, 61.6, 55.5 ppm.

**IR** (thin film) 3397, 3029, 2944, 2835, 1734, 1508, 1301, 1232, 1169, 1028  $\text{cm}^{-1}$ .

**HRMS** (CI<sup>+</sup>) Calcd for  $\text{C}_{22}\text{H}_{21}\text{NO}_3$   $[\text{M}]^+$ : 347.1521, found: 347.1535.

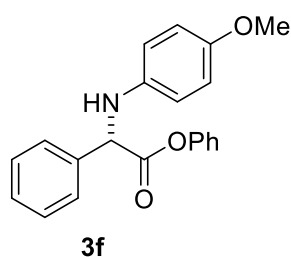

**Phenyl (S)-2-((4-methoxyphenyl)amino)-2-phenylacetate (3f)** was prepared as a white solid according to the General Procedure D (48 h at  $-10\text{ }^{\circ}\text{C}$ , eluent: *n*-hexane/EtOAc = 10:1, 54.7 mg, 82% yield, 87% ee).

$[\alpha]_{\text{D}}^{25}$ : +64.7 ( $c = 1.0$ ,  $\text{CH}_2\text{Cl}_2$ ). HPLC analysis of the product: Daicel CHIRALPAK<sup>®</sup> IC column; 5% *i*-PrOH in *n*-hexane; 1.0 mL/min; retention times: 17.7 min (major), 14.0 min (minor).

$^1\text{H NMR}$  (400 MHz,  $\text{CD}_2\text{Cl}_2$ )  $\delta$  7.69 – 7.66 (m, 2H), 7.52 – 7.39 (m, 5H), 7.32 – 7.28 (m, 1H), 7.04 – 7.01 (m, 2H), 6.84 – 6.81 (m, 2H), 6.73 – 6.70 (m, 2H), 5.39 (s, 1H), 4.79 (br, 1H), 3.77 (s, 3H) ppm.

$^{13}\text{C NMR}$  (100 MHz,  $\text{CD}_2\text{Cl}_2$ )  $\delta$  171.0, 152.8, 150.6, 140.1, 137.4, 129.5, 129.1, 128.6, 127.5, 126.2, 121.2, 114.84, 114.81, 61.8, 55.6 ppm.

**IR** (thin film) 3405, 3037, 2941, 1756, 1592, 1510, 1300, 1241, 1183, 1033  $\text{cm}^{-1}$ .

**HRMS** (CI+) Calcd for  $\text{C}_{21}\text{H}_{20}\text{NO}_3$   $[\text{M}+\text{H}]^+$ : 334.1443, found: 334.1433.

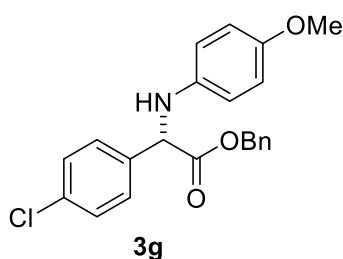

**Benzyl (S)-2-(4-chlorophenyl)-2-((4-methoxyphenyl)amino)acetate (3g)** was prepared as a light yellow solid according to the General Procedure D (66 h at  $-10\text{ }^\circ\text{C}$ , eluent: *n*-hexane/ethyl acetate = 10:1, 72.6 mg, 95% yield, 94% ee).

$[\alpha]_{\text{D}}^{25}$ : +52.2 ( $c = 1.0$ ,  $\text{CH}_2\text{Cl}_2$ ). HPLC analysis of the product: Daicel CHIRALPAK<sup>®</sup> IC column; 5% *i*-PrOH in *n*-hexane; 1.0 mL/min; retention times: 14.4 min (major), 12.1 min (minor).

$^1\text{H NMR}$  (400 MHz,  $\text{CD}_2\text{Cl}_2$ )  $\delta$  7.53 – 7.50 (m, 2H), 7.42 – 7.36 (m, 5H), 7.27 – 7.25 (m, 2H), 6.79 – 6.75 (m, 2H), 6.61 – 6.57 (m, 2H), 5.26 – 5.15 (m, 3H), 4.83 (br, 1H), 3.74 (s, 3H) ppm.

$^{13}\text{C NMR}$  (100 MHz,  $\text{CD}_2\text{Cl}_2$ )  $\delta$  171.4, 152.7, 139.9, 136.6, 135.4, 134.0, 128.9, 128.8, 128.5, 128.4, 127.9, 114.78, 114.76, 67.4, 61.0, 55.5 ppm.

**IR** (thin film) 3410, 3008, 2841, 1742, 1597, 1510, 1244, 1177, 1025  $\text{cm}^{-1}$ .

**HRMS** (CI+) Calcd for  $\text{C}_{22}\text{H}_{20}\text{ClNO}_3$   $[\text{M}]^+$ : 381.1132, found: 381.1130.

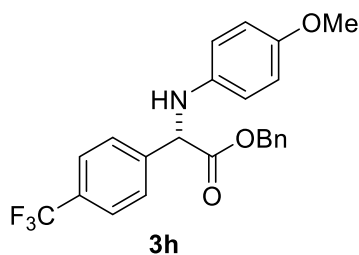

**Benzyl (S)-2-((4-methoxyphenyl)amino)-2-(4-(trifluoromethyl)phenyl)acetate (3h)** was prepared as a light yellow solid according to the General Procedure D (60 h at  $-10^{\circ}\text{C}$ , eluent: *n*-hexane/EtOAc = 10:1, 64.8 mg, 78% yield, 91% ee).

$[\alpha]_{\text{D}}^{25}$ : +40.5 ( $c = 1.0$ ,  $\text{CH}_2\text{Cl}_2$ ). HPLC analysis of the product: Daicel CHIRALPAK<sup>®</sup> IC column; 5% *i*-PrOH in *n*-hexane; 1.0 mL/min; retention times: 10.6 min (major), 9.0 min (minor).

<sup>1</sup>H NMR (400 MHz,  $\text{CD}_2\text{Cl}_2$ )  $\delta$  7.73 – 7.67 (m, 4H), 7.38 – 7.36 (m, 3H), 7.25 – 7.23 (m, 2H), 6.79 – 6.76 (m, 2H), 6.60 – 6.58 (m, 2H), 5.27 – 5.18 (m, 3H), 4.91 (br, 1H), 3.74 (s, 3H) ppm.

<sup>13</sup>C NMR (100 MHz,  $\text{CD}_2\text{Cl}_2$ )  $\delta$  171.0, 152.8, 142.3, 139.7, 135.3, 130.2 (q,  $^2J_{\text{C-F}} = 32.0$  Hz), 128.5, 128.4, 127.9 (2C), 125.7 (q,  $^3J_{\text{C-F}} = 3.6$  Hz), 124.2 (q,  $^1J_{\text{C-F}} = 270.4$  Hz), 114.8 (2C), 67.5, 61.3, 55.5 ppm.

<sup>19</sup>F NMR (376 MHz,  $\text{CD}_2\text{Cl}_2$ )  $\delta$   $-62.8$  ppm.

IR (thin film) 3401, 2945, 2837, 1739, 1616, 1513, 1456, 1318, 1235, 1168, 1061  $\text{cm}^{-1}$ .

HRMS (CI<sup>+</sup>) Calcd for  $\text{C}_{23}\text{H}_{20}\text{F}_3\text{NO}_3$   $[\text{M}]^+$ : 415.1395, found: 415.1393.

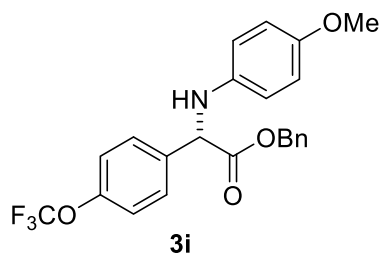

**Benzyl (S)-2-((4-methoxyphenyl)amino)-2-(4-(trifluoromethoxy)phenyl)acetate (3i)** was prepared as a light yellow solid according to the General Procedure D (91 h at  $-15^{\circ}\text{C}$ , eluent: *n*-hexane/EtOAc = 10:1, 80.2 mg, 93% yield, 90% ee).

$[\alpha]_{\text{D}}^{25}$ : +35.3 ( $c = 1.0$ ,  $\text{CH}_2\text{Cl}_2$ ). HPLC analysis of the product: Daicel CHIRALPAK<sup>®</sup> IC

column; 5% *i*-PrOH in *n*-hexane; 1.0 mL/min; retention times: 10.3 min (major), 8.8 min (minor).

$^1\text{H NMR}$  (400 MHz, acetone- $d_6$ )  $\delta$  7.73 – 7.69 (m, 2H), 7.35 – 7.22 (m, 7H), 6.74 – 6.69 (m, 4H), 5.45 (d,  $J = 7.6$  Hz, 1H), 5.34 – 5.33 (m, 1H), 5.23 – 5.16 (m, 2H), 3.67 (s, 3H) ppm.

$^{13}\text{C NMR}$  (100 MHz, acetone- $d_6$ )  $\delta$  171.3, 152.6, 148.7, 140.6, 137.7, 136.0, 129.4, 128.3, 128.0, 127.7, 121.1, 120.5 (q,  $^1J_{\text{C-F}} = 254.0$  Hz), 114.8, 114.5, 66.6, 60.6, 54.8 ppm.

$^{19}\text{F NMR}$  (376 MHz, acetone- $d_6$ )  $\delta$  –58.5 ppm.

IR (thin film) 3404, 3031, 2943, 1740, 1511, 1238, 1170, 1031  $\text{cm}^{-1}$ .

HRMS (CI+) Calcd for  $\text{C}_{23}\text{H}_{21}\text{F}_3\text{NO}_4$   $[\text{M}+\text{H}]^+$ : 432.1423, found: 432.1429.

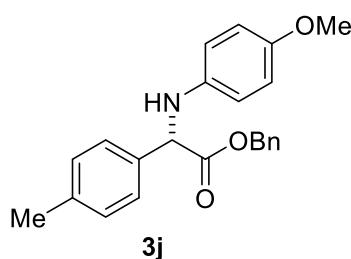

**Benzyl (S)-2-((4-methoxyphenyl)amino)-2-(p-tolyl)acetate (3j)** was prepared as a white solid according to the General Procedure D (46 h at –15 °C, eluent: *n*-hexane/EtOAc = 10:1, 65.1 mg, 90% yield, 97% ee).

$[\alpha]_{\text{D}}^{25}$ : +55.6 ( $c = 1.0$ ,  $\text{CH}_2\text{Cl}_2$ ). HPLC analysis of the product: Daicel CHIRALPAK<sup>®</sup> IC column; 3% *i*-PrOH in *n*-hexane; 1.0 mL/min; retention times: 26.6 min (major), 23.3 min (minor).

$^1\text{H NMR}$  (400 MHz,  $\text{CD}_2\text{Cl}_2$ )  $\delta$  7.44 – 7.42 (m, 2H), 7.38 – 7.35 (m, 3H), 7.26 – 7.23 (m, 4H), 6.78 – 6.74 (m, 2H), 6.62 – 6.59 (m, 2H), 5.26 – 5.13 (m, 3H), 4.74 (d,  $J = 5.6$  Hz, 1H), 3.74 (s, 3H), 2.40 (s, 3H) ppm.

$^{13}\text{C NMR}$  (100 MHz,  $\text{CD}_2\text{Cl}_2$ )  $\delta$  172.0, 152.5, 140.3, 138.3, 135.7, 134.8, 129.5, 128.5, 128.2, 127.8, 127.2, 114.7 (2C), 67.1, 61.3, 55.5, 20.9 ppm.

IR (thin film) 3403, 3033, 2941, 2839, 1738, 1512, 1455, 1303, 1238, 1174, 1033  $\text{cm}^{-1}$ .

HRMS (CI+) Calcd for  $\text{C}_{23}\text{H}_{23}\text{NNaO}_3$   $[\text{M}+\text{Na}]^+$ : 384.1576, found: 384.1584.



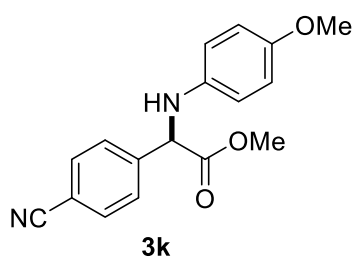

**Methyl (R)-2-(4-cyanophenyl)-2-((4-methoxyphenyl)amino)acetate (3k)** was prepared as a yellow oil according to the General Procedure D, except that (*R*)-C5 was used as the catalyst (12 h at 25 °C, 55.1 mg, 93% yield, 86% ee).

$[\alpha]_{\text{D}}^{25}$ : -114.2 ( $c = 1.0$ ,  $\text{CH}_2\text{Cl}_2$ ). HPLC analysis of the product: Daicel CHIRALPAK® IC column; 15% *i*-PrOH in *n*-hexane; 1.0 mL/min; retention times: 30.5 min (major), 35.7 min (minor).

$^1\text{H NMR}$  (400 MHz,  $\text{CDCl}_3$ )  $\delta$  7.66 (s, 4H), 6.74 – 6.72 (m, 2H), 6.50 – 6.48 (m, 2H), 5.09 (d,  $J = 5.2$  Hz, 1H), 4.85 (d,  $J = 5.2$  Hz, 1H), 3.76 (s, 3H), 3.72 (s, 3H) ppm.

$^{13}\text{C NMR}$  (100 MHz,  $\text{CDCl}_3$ )  $\delta$  171.2, 152.8, 143.4, 139.4, 132.7, 128.1, 118.6, 114.9, 114.8, 112.2, 61.3, 55.7, 53.2 ppm.

**IR** (thin film) 3394, 2945, 2839, 1739, 1510, 1304, 1232, 1028  $\text{cm}^{-1}$ .

**HRMS** (CI+) Calcd for  $\text{C}_{17}\text{H}_{17}\text{N}_2\text{O}_3$   $[\text{M}+\text{H}]^+$ : 297.1239, found: 297.1237.

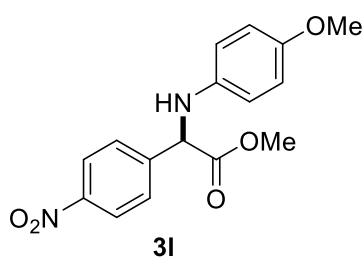

**Methyl (R)-2-((4-methoxyphenyl)amino)-2-(4-nitrophenyl)acetate (3l)** was prepared as a brown oil according to the General Procedure D, except that (*R*)-C5 was used as the catalyst (12 h at 25 °C, 59.5 mg, 94% yield, 81% ee).

$[\alpha]_{\text{D}}^{25}$ : -134.1 ( $c = 1.0$ ,  $\text{CH}_2\text{Cl}_2$ ). HPLC analysis of the product: Daicel CHIRALPAK® IC column; 10% *i*-PrOH in *n*-hexane; 1.0 mL/min; retention times: 29.9 min (major), 35.7 min (minor).

$^1\text{H NMR}$  (400 MHz,  $\text{CDCl}_3$ )  $\delta$  8.25 – 8.22 (m, 2H), 7.74 – 7.71 (m, 2H), 6.76 – 6.72 (m, 2H), 6.51 – 6.47 (m, 2H), 5.14 (d,  $J = 5.0$  Hz, 1H), 4.87 (d,  $J = 5.0$  Hz, 1H), 3.78 (s, 3H), 3.72 (s, 3H) ppm.

$^{13}\text{C NMR}$  (100 MHz,  $\text{CDCl}_3$ )  $\delta$  171.0, 152.9, 147.9, 145.4, 139.3, 128.3, 124.1, 114.9, 114.8, 61.2, 55.7, 53.3 ppm.

**IR** (thin film) 3400, 2947, 2842, 1741, 1602, 1515, 1450, 1343, 1236, 1181, 1033  $\text{cm}^{-1}$ .

**HRMS** (CI+) Calcd for  $\text{C}_{16}\text{H}_{17}\text{N}_2\text{O}_5$   $[\text{M}+\text{H}]^+$ : 317.1137, found: 317.1136.

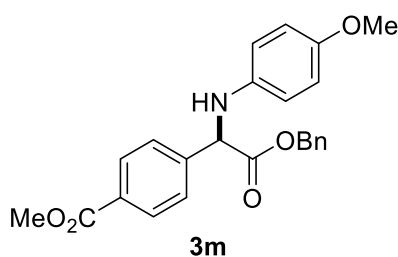

**Methyl (R)-4-(2-(benzyloxy)-1-((4-methoxyphenyl)amino)-2-oxoethyl)benzoate (3m)**

was prepared as a white solid according to the General Procedure D, except that (R)-**C5** was used as the catalyst (12 h at 25 °C, 78.7 mg, 97% yield, 90% ee).

$[\alpha]_{\text{D}}^{25}$ :  $-39.2$  ( $c = 1.0$ ,  $\text{CH}_2\text{Cl}_2$ ). HPLC analysis of the product: Daicel CHIRALPAK<sup>®</sup> IC column; 10% *i*-PrOH in *n*-hexane; 1.0 mL/min; retention times: 26.1 min (major), 36.6 min (minor).

$^1\text{H NMR}$  (400 MHz, acetone- $d_6$ )  $\delta$  8.02 – 8.00 (m, 2H), 7.72 – 7.70 (m, 2H), 7.33 – 7.23 (m, 5H), 6.74 – 6.69 (m, 4H), 5.47 (d,  $J = 7.7$  Hz, 1H), 5.38 – 5.36 (m, 1H), 5.23 – 5.15 (m, 2H), 3.88 (s, 3H), 3.66 (s, 3H) ppm.

$^{13}\text{C NMR}$  (100 MHz, acetone- $d_6$ )  $\delta$  171.1, 166.1, 152.6, 143.6, 140.5, 135.9, 130.0, 129.6, 128.4, 128.1, 127.79, 127.75, 114.9, 114.5, 66.8, 61.1, 54.9, 51.5 ppm.

**IR** (thin film) 3399, 2947, 2843, 1729, 1513, 1446, 1283, 1178, 1114, 1028  $\text{cm}^{-1}$ .

**HRMS** (CI+) Calcd for  $\text{C}_{24}\text{H}_{24}\text{NO}_5$   $[\text{M}+\text{H}]^+$ : 406.1654, found: 406.1657.

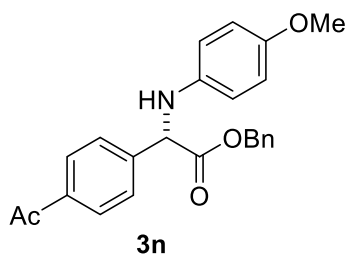

**Benzyl (S)-2-(4-acetylphenyl)-2-((4-methoxyphenyl)amino)acetate (3n)** was prepared as a light yellow solid according to the General Procedure D (64 h at  $-15\text{ }^{\circ}\text{C}$ , eluent: *n*-hexane/EtOAc = 10:1 to 5:1, 43.6 mg, 56% yield (>90% based on recovered starting material, 95% ee).

$[\alpha]_{\text{D}}^{25}$ : +64.9 ( $c = 1.0$ ,  $\text{CH}_2\text{Cl}_2$ ). HPLC analysis of the product: Daicel CHIRALPAK<sup>®</sup> OD-H column; 20% *i*-PrOH in *n*-hexane; 1.0 mL/min; retention times: 26.5 min (major), 24.1 min (minor).

<sup>1</sup>H NMR (400 MHz,  $\text{CD}_2\text{Cl}_2$ )  $\delta$  7.97 – 7.94 (m, 2H), 7.64 – 7.62 (m, 2H), 7.34 – 7.32 (m, 3H), 7.23 – 7.20 (m, 2H), 6.73 – 6.71 (m, 2H), 6.56 – 6.54 (m, 2H), 5.23 – 5.13 (m, 3H), 4.84 (d,  $J = 5.7$  Hz, 1H), 3.70 (s, 3H), 2.59 (s, 3H) ppm.

<sup>13</sup>C NMR (100 MHz,  $\text{CD}_2\text{Cl}_2$ )  $\delta$  196.7, 170.4, 152.1, 142.4, 139.1, 136.5, 134.7, 128.1, 127.9, 127.7, 127.2, 126.9, 114.10, 114.08, 66.8, 60.8, 54.9, 25.9 ppm.

IR (thin film) 3399, 2948, 2838, 1741, 1681, 1604, 1513, 1445, 1244, 1175, 1030  $\text{cm}^{-1}$ .

HRMS (CI<sup>+</sup>) Calcd for  $\text{C}_{24}\text{H}_{24}\text{NO}_4$   $[\text{M}+\text{H}]^+$ : 390.1705, found: 390.1708.

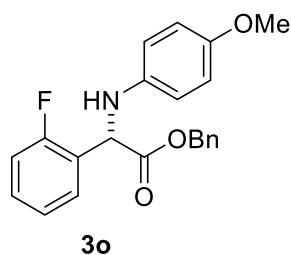

**Benzyl (S)-2-(2-fluorophenyl)-2-((4-methoxyphenyl)amino)acetate (3o)** was prepared as a light yellow oil according to the General Procedure D (48 h at  $25\text{ }^{\circ}\text{C}$ , eluent: *n*-hexane/EtOAc = 10:1, 82% yield, 74% ee).

$[\alpha]_{\text{D}}^{25}$ : +71.4 ( $c = 1.0$ ,  $\text{CH}_2\text{Cl}_2$ ). HPLC analysis of the product: Daicel CHIRALPAK<sup>®</sup> IC column; 5% *i*-PrOH in *n*-hexane; 1.0 mL/min; retention times: 14.6 min (major), 11.9

min (minor).

$^1\text{H NMR}$  (400 MHz,  $\text{CD}_2\text{Cl}_2$ )  $\delta$  7.51 – 7.47 (m, 1H), 7.40 – 7.34 (m, 4H), 7.26 – 7.16 (m, 4H), 6.80 – 6.76 (m, 2H), 6.66 – 6.62 (m, 2H), 5.53 (s, 1H), 5.27 – 5.19 (m, 2H), 4.81 (br, 1H), 3.74 (s, 3H) ppm.

$^{13}\text{C NMR}$  (100 MHz,  $\text{CD}_2\text{Cl}_2$ )  $\delta$  171.2, 160.9 (d,  $^1J_{\text{C-F}} = 245.7$  Hz), 152.8, 139.8, 135.5, 130.0 (d,  $^3J_{\text{C-F}} = 8.4$  Hz), 128.5, 128.3 (d,  $^4J_{\text{C-F}} = 3.3$  Hz), 128.2, 127.6, 125.4 (d,  $^2J_{\text{C-F}} = 13.9$  Hz), 124.6 (d,  $^3J_{\text{C-F}} = 3.3$  Hz), 115.7 (d,  $^2J_{\text{C-F}} = 21.8$  Hz), 114.8, 114.7, 67.3, 55.5, 54.9 (d,  $^3J_{\text{C-F}} = 2.9$  Hz) ppm.

$^{19}\text{F NMR}$  (376 MHz,  $\text{CD}_2\text{Cl}_2$ )  $\delta$  -118.8 ppm.

**IR** (thin film) 3397, 3034, 2945, 2834, 1737, 1509, 1300, 1230, 1033, 980  $\text{cm}^{-1}$ .

**HRMS** (CI+) Calcd for  $\text{C}_{22}\text{H}_{20}\text{FNNaO}_3$   $[\text{M}+\text{Na}]^+$ : 388.1325, found: 388.1330.

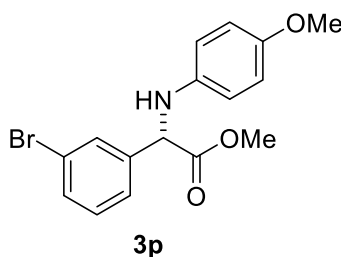

**Methyl (S)-2-(3-bromophenyl)-2-((4-methoxyphenyl)amino)acetate (3p)** was prepared as a light yellow oil according to the General Procedure D (64 h at  $-10$  °C, eluent: *n*-hexane/EtOAc = 10:1, 63.7 mg, 91% yield, 92% ee).

$[\alpha]_{\text{D}}^{25}$ : +110.4 ( $c = 1.0$ ,  $\text{CH}_2\text{Cl}_2$ ). HPLC analysis of the product: Daicel CHIRALPAK<sup>®</sup> IC column; 5% *i*-PrOH in *n*-hexane; 1.0 mL/min; retention times: 13.7 min (major), 11.8 min (minor).

$^1\text{H NMR}$  (400 MHz, acetone- $d_6$ )  $\delta$  7.77 – 7.76 (m, 1H), 7.58 – 7.56 (m, 1H), 7.51 – 7.49 (m, 1H), 7.33 (t,  $J = 7.9$  Hz, 1H), 6.74 – 6.67 (m, 4H), 5.43 (d,  $J = 7.5$  Hz, 1H), 5.22 (d,  $J = 7.5$  Hz, 1H), 3.70 (s, 3H), 3.67 (s, 3H) ppm.

$^{13}\text{C NMR}$  (100 MHz, acetone- $d_6$ )  $\delta$  171.7, 152.5, 141.3, 140.4, 131.0, 130.6, 130.3, 126.5, 122.2, 114.8, 114.5, 60.5, 54.8, 52.1 ppm.

**IR** (thin film) 3400, 3003, 2949, 2837, 1738, 1512, 1297, 1235, 1180, 1034  $\text{cm}^{-1}$ .

HRMS (CI+) Calcd for C<sub>16</sub>H<sub>16</sub>BrNO<sub>3</sub> [M]<sup>+</sup>: 349.0314, found: 349.0316.

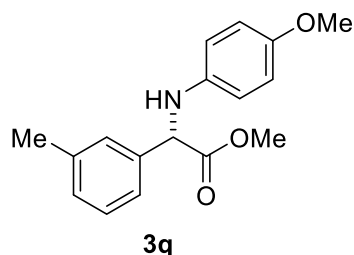

**Methyl (S)-2-((4-methoxyphenyl)amino)-2-(*m*-tolyl)acetate (3q)** was prepared as a light yellow oil according to the General Procedure D (60 h at -10 °C, eluent: *n*-hexane/EtOAc = 10:1, 50.8 mg, 89% yield, 93% ee).

[ $\alpha$ ]<sub>D</sub><sup>25</sup>: +115.4 (*c* = 1.0, CH<sub>2</sub>Cl<sub>2</sub>). HPLC analysis of the product: Daicel CHIRALPAK® IC column; 5% *i*-PrOH in *n*-hexane; 1.0 mL/min; retention times: 15.9 min (major), 14.7 min (minor).

<sup>1</sup>H NMR (400 MHz, CD<sub>2</sub>Cl<sub>2</sub>)  $\delta$  7.36 – 7.28 (m, 3H), 7.20 – 7.18 (m, 1H), 6.79 – 6.75 (m, 2H), 6.62 – 6.58 (m, 2H), 5.06 (d, *J* = 4.1 Hz, 1H), 4.75 (br, 1H), 3.75 (s, 3H), 3.74 (s, 3H), 2.40 (s, 3H) ppm.

<sup>13</sup>C NMR (100 MHz, CD<sub>2</sub>Cl<sub>2</sub>)  $\delta$  172.5, 152.5, 140.3, 138.7, 138.0, 129.0, 128.6, 127.9, 124.4, 114.7, 114.6, 61.4, 55.5, 52.5, 21.2 ppm.

IR (thin film) 3403, 3009, 2948, 2838, 1738, 1511, 1451, 1302, 1237, 1034 cm<sup>-1</sup>.

HRMS (CI+) Calcd for C<sub>17</sub>H<sub>19</sub>NNaO<sub>3</sub> [M+Na]<sup>+</sup>: 308.1263, found: 308.1266.

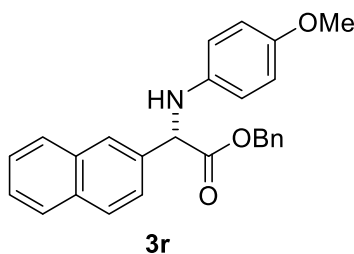

**Benzyl (S)-2-((4-methoxyphenyl)amino)-2-(naphthalen-2-yl)acetate (3r)** was prepared as a light yellow solid according to the General Procedure D (91 h at -15 °C, 70.8 mg, 89% yield, 92% ee).

[ $\alpha$ ]<sub>D</sub><sup>25</sup>: +51.4 (*c* = 1.0, CH<sub>2</sub>Cl<sub>2</sub>). HPLC analysis of the product: Daicel CHIRALPAK® IC

column; 5% *i*-PrOH in *n*-hexane; 1.0 mL/min; retention times: 22.1 min (major), 18.0 min (minor).

$^1\text{H NMR}$  (400 MHz, acetone- $d_6$ )  $\delta$  8.07 (s, 1H), 7.92 – 7.87 (m, 3H), 7.72 – 7.69 (m, 1H), 7.54 – 7.50 (m, 2H), 7.29 – 7.22 (m, 5H), 6.76 – 6.70 (m, 4H), 5.50 – 5.42 (m, 2H), 5.25 – 5.14 (m, 2H), 3.66 (s, 3H) ppm.

$^{13}\text{C NMR}$  (100 MHz, acetone- $d_6$ )  $\delta$  171.7, 152.4, 140.9, 136.1, 135.9, 133.4, 133.3, 128.3, 128.0, 127.9, 127.8, 127.6, 126.6, 126.3, 126.2, 125.4, 114.8 (2C), 114.5, 66.5, 61.5, 54.8 ppm.

**IR** (thin film) 3402, 3044, 2944, 2836, 1738, 1594, 1512, 1455, 1239, 1174, 1032  $\text{cm}^{-1}$ .

**HRMS** (CI+) Calcd for  $\text{C}_{26}\text{H}_{23}\text{NO}_3$   $[\text{M}]^+$ : 397.1678, found: 397.1683.

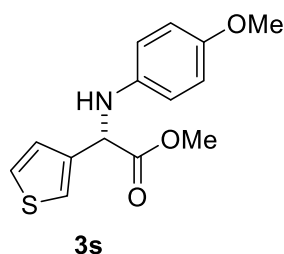

**Methyl (S)-2-((4-methoxyphenyl)amino)-2-(thiophen-3-yl)acetate (3s)** was prepared as a light yellow oil according to the General Procedure D (50 h at  $-15\text{ }^\circ\text{C}$ , eluent: *n*-hexane/EtOAc = 10:1, 45.5 mg, 82% yield, 90% ee).

$[\alpha]_{\text{D}}^{25}$ : +71.9 ( $c = 1.0$ ,  $\text{CH}_2\text{Cl}_2$ ). HPLC analysis of the product: Daicel CHIRALPAK<sup>®</sup> AD-H column; 5% *i*-PrOH in *n*-hexane; 1.0 mL/min; retention times: 29.5 min (major), 26.7 min (minor).

$^1\text{H NMR}$  (400 MHz,  $\text{CD}_2\text{Cl}_2$ )  $\delta$  7.40 – 7.37 (m, 2H), 7.22 – 7.21 (m, 1H), 6.81 – 6.77 (m, 2H), 6.65 – 6.61 (m, 2H), 5.22 (s, 1H), 4.61 (br, 1H), 3.77 (s, 3H), 3.75 (s, 3H) ppm.

$^{13}\text{C NMR}$  (100 MHz,  $\text{CD}_2\text{Cl}_2$ )  $\delta$  172.2, 152.8, 140.3, 138.6, 126.5, 126.4, 122.9, 114.8, 114.7, 57.6, 55.5, 52.6 ppm.

**IR** (thin film) 3396, 3104, 2947, 2837, 1739, 1511, 1452, 1299, 1232, 1173, 1032  $\text{cm}^{-1}$ .

**HRMS** (CI+) Calcd for  $\text{C}_{14}\text{H}_{15}\text{NNaO}_3\text{S}$   $[\text{M}+\text{Na}]^+$ : 300.0670, found: 300.0683.

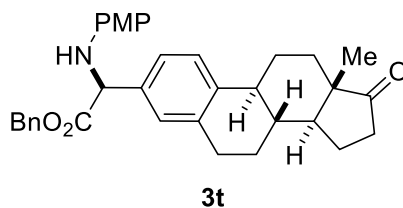

**Benzyl** (S)-2-((4-methoxyphenyl)amino)-2-((8R,9S,13S,14S)-13-methyl-17-oxo-7,8,9,11,12,13,14,15,16,17-decahydro-6H-cyclopenta[a]phenanthren-3-yl)acetate (**3t**) was prepared as a white foam according to the General Procedure D (62 h at  $-15\text{ }^{\circ}\text{C}$ , eluent: *n*-hexane/EtOAc = 10:1 to 5:1, 51.3 mg, 49% yield, >30:1 dr). The yield was >95% based on recovered starting material.

$[\alpha]_{\text{D}}^{25}$ : +123.6 ( $c = 1.0$ ,  $\text{CH}_2\text{Cl}_2$ ).

$^1\text{H NMR}$  (400 MHz,  $\text{CD}_2\text{Cl}_2$ )  $\delta$  7.41 – 7.33 (m, 4H), 7.30 – 7.23 (m, 4H), 6.77 – 6.75 (m, 2H), 6.61 – 6.59 (m, 2H), 5.24 – 5.14 (m, 2H), 5.09 (s, 1H), 4.71 – 4.70 (m, 1H), 3.74 (s, 3H), 2.95 – 2.92 (m, 2H), 2.55 – 2.43 (m, 2H), 2.38 – 2.33 (m, 1H), 2.20 – 2.05 (m, 3H), 1.98 – 1.94 (m, 1H), 1.70 – 1.46 (m, 6H), 0.94 (s, 3H) ppm.

$^{13}\text{C NMR}$  (100 MHz,  $\text{CD}_2\text{Cl}_2$ )  $\delta$  220.2, 172.0, 152.5, 140.3, 140.2, 137.3, 135.7, 135.0, 128.4, 128.2, 127.8, 127.7, 125.8, 124.6, 114.7, 114.6, 67.0, 61.3, 55.5, 50.5, 47.8, 44.4, 38.1, 35.8, 31.7, 29.4, 26.4, 25.7, 21.5, 13.7 ppm.

**IR** (thin film) 3393, 2930, 1733, 1510, 1308, 1232, 1169, 1027  $\text{cm}^{-1}$ .

**HRMS** (CI+) Calcd for  $\text{C}_{34}\text{H}_{37}\text{NNaO}_4$   $[\text{M}+\text{Na}]^+$ : 546.2620, found: 546.2628.

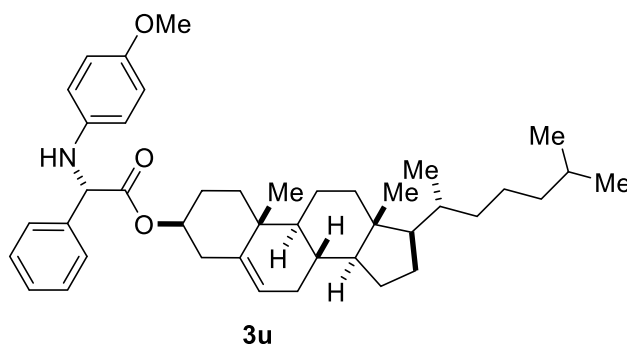

(3S,8S,9S,10R,13R,14S,17R)-10,13-Dimethyl-17-((R)-6-methylheptan-2-yl)-2,3,4,7,8,9,10,11,12,13,14,15,16,17-tetradecahydro-1H-cyclopenta[a]phenanthren-3-yl (S)-2-((4-methoxyphenyl)amino)-2-phenylacetate (**3u**) was prepared as a light yellow

foam according to the General Procedure D (0.1 mmol scale, 50 h at  $-15\text{ }^{\circ}\text{C}$ , eluent: *n*-hexane/EtOAc = 10:1, 54.5 mg, 87% yield, >50:1 dr).

$[\alpha]_{\text{D}}^{25}$ : +18.2 ( $c = 1.0$ ,  $\text{CH}_2\text{Cl}_2$ ).

$^1\text{H NMR}$  (400 MHz,  $\text{CD}_2\text{Cl}_2$ )  $\delta$  7.56 – 7.53 (m, 2H), 7.44 – 7.34 (m, 3H), 6.78 – 6.74 (m, 2H), 6.61 – 6.57 (m, 2H), 5.37 – 5.35 (m, 1H), 5.06 (s, 1H), 4.75 – 4.63 (m, 2H), 3.73 (s, 3H), 2.25 – 1.85 (m, 7H), 1.74 – 1.41 (m, 10H), 1.38 – 1.12 (m, 8H), 1.10 – 1.02 (m, 5H), 1.01 – 0.98 (m, 4H), 0.94 (d,  $J = 1.5\text{ Hz}$ , 3H), 0.92 (d,  $J = 1.5\text{ Hz}$ , 3H), 0.74 (s, 3H) ppm.

$^{13}\text{C NMR}$  (100 MHz,  $\text{CD}_2\text{Cl}_2$ )  $\delta$  171.3, 152.5, 140.3, 139.4, 138.2, 128.7, 128.1, 127.2, 122.8, 114.7, 114.6, 75.4, 61.6, 56.7, 56.2, 55.5, 50.1, 42.3, 39.8, 39.5, 37.6, 36.9, 36.5, 36.2, 35.8, 31.9, 31.8, 28.2, 28.0, 27.7, 24.3, 23.8, 22.6, 22.4, 21.0, 19.1, 18.5, 11.6 ppm.

IR (thin film) 3410, 2938, 1730, 1511, 1310, 1230, 1015  $\text{cm}^{-1}$ .

HRMS (CI+) Calcd for  $\text{C}_{42}\text{H}_{59}\text{NNaO}_3$   $[\text{M}+\text{Na}]^+$ : 648.4393, found: 648.4398.

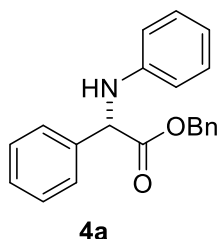

**Benzyl (S)-2-phenyl-2-(phenylamino)acetate (4a)** was prepared as a light yellow oil according to the General Procedure D (60 h at  $-10\text{ }^{\circ}\text{C}$ , eluent: *n*-hexane/EtOAc = 10:1, 60.3 mg, 95% yield, 94% ee).

$[\alpha]_{\text{D}}^{25}$ : +49.4 ( $c = 1.0$ ,  $\text{CH}_2\text{Cl}_2$ ). HPLC analysis of the product: Daicel CHIRALPAK<sup>®</sup> IC column; 5% *i*-PrOH in *n*-hexane; 1.0 mL/min; retention times: 8.2 min (major), 6.3 min (minor).

$^1\text{H NMR}$  (400 MHz,  $\text{CD}_2\text{Cl}_2$ )  $\delta$  7.60 – 7.57 (m, 2H), 7.47 – 7.36 (m, 6H), 7.29 – 7.25 (m, 2H), 7.21 – 7.16 (m, 2H), 6.79 – 6.75 (m, 1H), 6.67 – 6.64 (m, 2H), 5.29 – 5.18 (m, 3H), 5.11 (br, 1H) ppm.

$^{13}\text{C NMR}$  (100 MHz,  $\text{CD}_2\text{Cl}_2$ )  $\delta$  171.6, 146.1, 137.7, 135.6, 129.2, 128.9, 128.5, 128.4, 128.3, 127.8, 127.4, 118.1, 113.4, 67.3, 60.7 ppm.



IR (thin film) 3406, 3036, 2941, 1735, 1600, 1501, 1449, 1308, 1241, 1169, 1076  $\text{cm}^{-1}$ .

HRMS (CI+) Calcd for  $\text{C}_{21}\text{H}_{19}\text{NNaO}_2$   $[\text{M}+\text{Na}]^+$ : 340.1313, found: 340.1318.

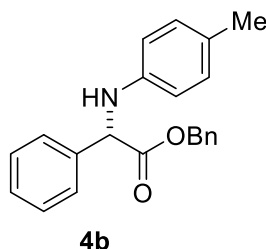

**Benzyl (S)-2-phenyl-2-(p-tolylamino)acetate (4b)** was prepared as a white solid according to the General Procedure D (60 h at  $-10\text{ }^\circ\text{C}$ , eluent: *n*-hexane/EtOAc = 10:1, 60.3 mg, 91% yield, 95% ee).

$[\alpha]_{\text{D}}^{25}$ : +58.3 ( $c = 1.0$ ,  $\text{CH}_2\text{Cl}_2$ ). HPLC analysis of the product: Daicel CHIRALPAK<sup>®</sup> IC column; 5% *i*-PrOH in *n*-hexane; 1.0 mL/min; retention times: 10.5 min (major), 7.7 min (minor).

$^1\text{H NMR}$  (400 MHz,  $\text{CD}_2\text{Cl}_2$ )  $\delta$  7.59 – 7.57 (m, 2H), 7.47 – 7.37 (m, 6H), 7.29 – 7.26 (m, 2H), 7.02 (d,  $J = 8.4$  Hz, 2H), 6.59 (d,  $J = 8.4$  Hz, 2H), 5.28 – 5.18 (m, 3H), 4.96 (d,  $J = 5.7$  Hz, 1H), 2.28 (s, 3H) ppm.

$^{13}\text{C NMR}$  (100 MHz,  $\text{CD}_2\text{Cl}_2$ )  $\delta$  171.8, 143.8, 137.9, 135.6, 129.7, 128.8, 128.5, 128.32, 128.25, 127.8, 127.4 (2C), 113.6, 67.2, 61.0, 20.1 ppm.

IR (thin film) 3403, 3028, 2921, 1733, 1616, 1517, 1453, 1378, 1301, 1241, 1168  $\text{cm}^{-1}$ .

HRMS (CI+) Calcd for  $\text{C}_{22}\text{H}_{22}\text{NO}_2$   $[\text{M}+\text{H}]^+$ : 332.1651, found: 332.1653.

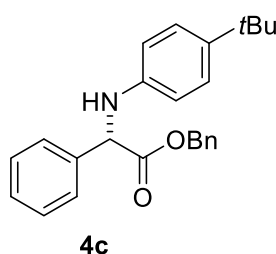

**Benzyl (S)-2-((4-*tert*-butyl)phenylamino)-2-phenylacetate (4c)** was prepared as a white solid according to the General Procedure D (72 h at  $-10\text{ }^\circ\text{C}$ , eluent: *n*-hexane/EtOAc = 10:1, 74.0 mg, 99% yield, 92% ee).

$[\alpha]_{\text{D}}^{25}$ : +52.8 ( $c = 1.0$ ,  $\text{CH}_2\text{Cl}_2$ ). HPLC analysis of the product: Daicel CHIRALPAK® IC column; 5% *i*-PrOH in *n*-hexane; 1.0 mL/min; retention times: 7.0 min (major), 8.2 min (minor).

$^1\text{H NMR}$  (400 MHz, acetone- $d_6$ )  $\delta$  7.60 – 7.58 (m, 2H), 7.40 – 7.29 (m, 6H), 7.25 – 7.22 (m, 2H), 7.16 – 7.13 (m, 2H), 6.70 – 6.66 (m, 2H), 5.54 (d,  $J = 7.3$  Hz, 1H), 5.30 – 5.28 (m, 1H), 5.23 – 5.14 (m, 2H), 1.25 (s, 9H) ppm.

$^{13}\text{C NMR}$  (100 MHz, acetone- $d_6$ )  $\delta$  171.6, 144.4, 139.9, 138.3, 136.1, 128.6, 128.4, 128.1, 128.0, 127.7, 127.5, 125.6, 113.2, 66.5, 60.7, 33.4, 31.0 ppm.

IR (thin film) 3408, 3034, 2957, 1736, 1613, 1518, 1462, 1306, 1243, 1172  $\text{cm}^{-1}$ .

HRMS (CI+) Calcd for  $\text{C}_{25}\text{H}_{28}\text{NO}_2$   $[\text{M}+\text{H}]^+$ : 374.2120, found: 374.2127.

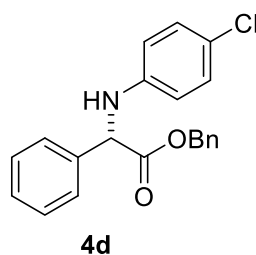

**Benzyl (S)-2-((4-chlorophenyl)amino)-2-phenylacetate (4d)** was prepared as a light yellow solid according to the General Procedure D (72 h at  $-10$  °C, eluent: *n*-hexane/EtOAc = 10:1, 66.1 mg, 94% yield, 92% ee).

$[\alpha]_{\text{D}}^{25}$ : +63.8 ( $c = 1.0$ ,  $\text{CH}_2\text{Cl}_2$ ). HPLC analysis of the product: Daicel CHIRALPAK® IC column; 5% *i*-PrOH in *n*-hexane; 1.0 mL/min; retention times: 7.4 min (major), 6.1 min (minor).

$^1\text{H NMR}$  (400 MHz, acetone- $d_6$ )  $\delta$  7.58 – 7.55 (m, 2H), 7.40 – 7.30 (m, 6H), 7.26 – 7.22 (m, 2H), 7.11 – 7.07 (m, 2H), 6.77 – 6.73 (m, 2H), 5.91 (d,  $J = 7.2$  Hz, 1H), 5.33 – 5.31 (m, 1H), 5.24 – 5.14 (m, 2H) ppm.

$^{13}\text{C NMR}$  (100 MHz, acetone- $d_6$ )  $\delta$  171.2, 145.7, 137.7, 136.0, 128.70, 128.68, 128.4, 128.2, 128.0, 127.7, 127.5, 121.5, 114.8, 66.6, 60.5 ppm.

IR (thin film) 3408, 3037, 2948, 1736, 1598, 1498, 1453, 1382, 1309, 1240, 1172, 1091 972  $\text{cm}^{-1}$ .

HRMS (CI+) Calcd for C<sub>21</sub>H<sub>19</sub>ClNO<sub>2</sub> [M+H]<sup>+</sup>: 352.1104, found: 352.1100.

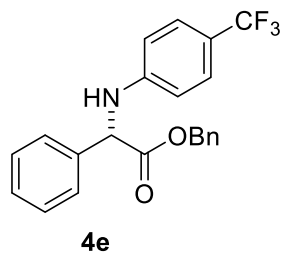

**Benzyl (S)-2-phenyl-2-((4-(trifluoromethyl)phenyl)amino)acetate (4e)** was prepared as a light yellow solid according to the General Procedure D (126 h at -10 °C, eluent: *n*-hexane/EtOAc = 10:1, 26.2 mg, 34% yield, 85% ee). The yield was >95% based on recovered starting material.

[ $\alpha$ ]<sub>D</sub><sup>25</sup>: +60.2 (*c* = 1.0, CH<sub>2</sub>Cl<sub>2</sub>). HPLC analysis of the product: Daicel CHIRALPAK® IC column; 5% *i*-PrOH in *n*-hexane; 1.0 mL/min; retention times: 5.2 min (major), 4.7 min (minor).

<sup>1</sup>H NMR (400 MHz, CD<sub>2</sub>Cl<sub>2</sub>)  $\delta$  7.55 – 7.52 (m, 2H), 7.45 – 7.33 (m, 8H), 7.24 – 7.21 (m, 2H), 6.64 (d, *J* = 8.6 Hz, 2H), 5.49 (d, *J* = 5.7 Hz, 1H), 5.27 – 5.16 (m, 3H) ppm.

<sup>13</sup>C NMR (100 MHz, CD<sub>2</sub>Cl<sub>2</sub>)  $\delta$  171.0, 148.5, 136.8, 135.3, 129.0, 128.6, 128.5, 128.3, 127.8, 127.2, 126.5 (q, <sup>3</sup>J<sub>C-F</sub> = 3.4 Hz), 125.0 (q, <sup>1</sup>J<sub>C-F</sub> = 267 Hz), 119.2 (q, <sup>2</sup>J<sub>C-F</sub> = 31.4 Hz), 112.7, 67.5, 60.2 ppm.

<sup>19</sup>F NMR (376 MHz, CD<sub>2</sub>Cl<sub>2</sub>)  $\delta$  -61.4 ppm.

IR (thin film) 3383, 3044, 2938, 1735, 1613, 1530, 1316, 1170, 1111 cm<sup>-1</sup>.

HRMS (CI+) Calcd for C<sub>22</sub>H<sub>19</sub>F<sub>3</sub>NO<sub>2</sub> [M+H]<sup>+</sup>: 386.1368, found: 386.1363.

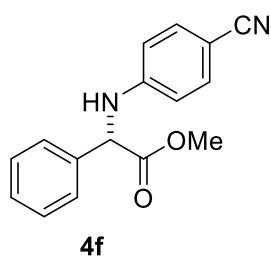

**Methyl (S)-2-((4-cyanophenyl)amino)-2-phenylacetate (4f)** was prepared as a light yellow oil according to the General Procedure D (67 h at 25 °C, eluent: *n*-hexane/EtOAc

= 10:1 to 5:1, 45.3 mg, 85% yield, 74% ee).

$[\alpha]_D^{25}$ : +46.3 ( $c = 1.0$ ,  $\text{CH}_2\text{Cl}_2$ ). HPLC analysis of the product: Daicel CHIRALPAK® AD-H column; 10% *i*-PrOH in *n*-hexane; 1.0 mL/min; retention times: 25.1 min (major), 39.9 min (minor).

$^1\text{H NMR}$  (400 MHz, acetone- $d_6$ )  $\delta$  7.57 – 7.55 (m, 2H), 7.46 – 7.33 (m, 5H), 6.86 – 6.82 (m, 2H), 6.60 (d,  $J = 6.9$  Hz, 1H), 5.37 (d,  $J = 6.9$  Hz, 1H), 3.71 (s, 3H) ppm.

$^{13}\text{C NMR}$  (100 MHz, acetone- $d_6$ )  $\delta$  171.3, 150.2, 137.2, 133.3, 128.8, 128.4, 127.5, 119.7, 113.2, 99.0, 59.5, 52.1 ppm.

IR (thin film) 3402, 3036, 2922, 2857, 1740, 1606, 1522, 1446, 1332, 1244, 1173  $\text{cm}^{-1}$ .

HRMS (CI+) Calcd for  $\text{C}_{16}\text{H}_{15}\text{N}_2\text{O}_2$   $[\text{M}+\text{H}]^+$ : 267.1134, found: 267.1136.

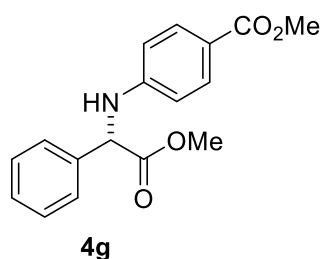

**Methyl (S)-4-((2-methoxy-2-oxo-1-phenylethyl)amino)benzoate (4g)** was prepared as a white solid according to the General Procedure D (24 h at 25 °C, eluent: *n*-hexane/EtOAc = 10:1 to 5:1, 46.7 mg, 78% yield, 82% ee).

$[\alpha]_D^{25}$ : +125.1 ( $c = 1.0$ ,  $\text{CH}_2\text{Cl}_2$ ). HPLC analysis of the product: Daicel CHIRALPAK® AD-H column; 10% *i*-PrOH in *n*-hexane; 1.0 mL/min; retention times: 22.5 min (major), 24.9 min (minor).

$^1\text{H NMR}$  (400 MHz,  $\text{CD}_2\text{Cl}_2$ )  $\delta$  7.84 – 7.81(m, 2H), 7.54 – 7.51 (m, 2H), 7.44 – 7.36 (m, 3H), 6.61 – 6.59 (m, 2H), 5.60 (d,  $J = 5.9$  Hz, 1H), 5.21 (d,  $J = 5.9$  Hz, 1H), 3.83 (s, 3H), 3.77 (s, 3H) ppm.

$^{13}\text{C NMR}$  (100 MHz,  $\text{CD}_2\text{Cl}_2$ )  $\delta$  171.6, 166.8, 149.7, 137.0, 131.2, 129.0, 128.5, 127.2, 119.3, 112.3, 60.0, 52.9, 51.4 ppm.

IR (thin film) 3405, 3059, 2945, 1735, 1701, 1603, 1523, 1432, 1324, 1283, 1173  $\text{cm}^{-1}$ .

HRMS (CI+) Calcd for  $\text{C}_{17}\text{H}_{18}\text{NO}_4$   $[\text{M}+\text{H}]^+$ : 300.1236, found: 300.1237.

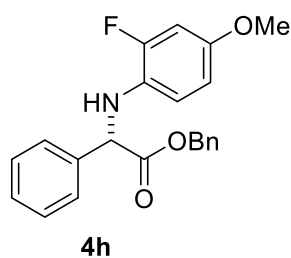

**Benzyl (S)-2-((2-fluoro-4-methoxyphenyl)amino)-2-phenylacetate (4h)** was prepared as a light yellow solid according to the General Procedure D (72 h at  $-10\text{ }^{\circ}\text{C}$ , eluent: *n*-hexane/EtOAc = 10:1, 70.9 mg, 97% yield, 96% ee).

$[\alpha]_{\text{D}}^{25}$ : +47.8 ( $c = 1.0$ ,  $\text{CH}_2\text{Cl}_2$ ). HPLC analysis of the product: Daicel CHIRALPAK<sup>®</sup> IC column; 5% *i*-PrOH in *n*-hexane; 1.0 mL/min; retention times: 10.3 min (major), 8.2 min (minor).

<sup>1</sup>H NMR (400 MHz, acetone-*d*<sub>6</sub>)  $\delta$  7.58 – 7.56 (m, 2H), 7.41 – 7.29 (m, 6H), 7.25 – 7.22 (m, 2H), 6.74 – 6.70 (m, 1H), 6.66 – 6.61 (m, 1H), 6.53 – 6.50 (m, 1H), 5.32 (d,  $J = 7.4$  Hz, 1H), 5.24 – 5.16 (m, 2H), 5.07 (d,  $J = 7.4$  Hz, 1H), 3.69 (s, 3H) ppm.

<sup>13</sup>C NMR (100 MHz, acetone-*d*<sub>6</sub>)  $\delta$  171.4, 152.4 (d,  $^3J_{\text{C-F}} = 9.9$  Hz), 152.1 (d,  $^1J_{\text{C-F}} = 237.1$  Hz), 137.9, 135.9, 128.7, 128.378 (d,  $^3J_{\text{C-F}} = 11.8$  Hz), 128.376, 128.1 (d,  $^2J_{\text{C-F}} = 20.0$  Hz), 127.7, 127.4, 114.8, 114.7, 109.3 (d,  $^4J_{\text{C-F}} = 3.1$  Hz), 102.1 (d,  $^2J_{\text{C-F}} = 22.5$  Hz), 66.7, 60.9, 55.1 ppm.

<sup>19</sup>F NMR (376 MHz, acetone-*d*<sub>6</sub>)  $\delta$  -133.4 ppm.

IR (thin film) 3413, 3035, 2945, 2838, 1738, 1516, 1454, 1379, 1294, 1159, 1096  $\text{cm}^{-1}$ .

HRMS (CI+) Calcd for  $\text{C}_{22}\text{H}_{20}\text{FNNaO}_3$   $[\text{M}+\text{Na}]^+$ : 388.1325, found: 388.1329.

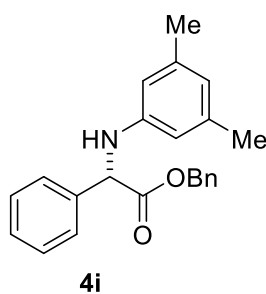

**Benzyl (S)-2-((3,5-dimethylphenyl)amino)-2-phenylacetate (4i)** was prepared as a

white solid according to the General Procedure D (72 h at  $-10\text{ }^{\circ}\text{C}$ , eluent: *n*-hexane/EtOAc = 10:1, 67.0 mg, 97% yield, 91% ee).

$[\alpha]_{\text{D}}^{25}$ : +56.2 ( $c = 1.0$ ,  $\text{CH}_2\text{Cl}_2$ ). HPLC analysis of the product: Daicel CHIRALPAK<sup>®</sup> IC column; 5% *i*-PrOH in *n*-hexane; 1.0 mL/min; retention times: 7.9 min (major), 5.7 min (minor).

<sup>1</sup>H NMR (400 MHz,  $\text{CD}_2\text{Cl}_2$ )  $\delta$  7.59 – 7.57 (m, 2H), 7.47 – 7.37 (m, 6H), 7.29 – 7.26 (m, 2H), 6.46 (s, 1H), 6.31 (s, 2H), 5.30 – 5.16 (m, 3H), 4.91 (d,  $J = 6.7$  Hz, 1H), 2.25 (s, 6H) ppm.

<sup>13</sup>C NMR (100 MHz,  $\text{CD}_2\text{Cl}_2$ )  $\delta$  171.8, 146.2, 138.9, 137.9, 135.7, 128.9, 128.5, 128.33, 128.25, 127.8, 128.3, 120.2, 111.4, 67.2, 60.8, 21.2 ppm.

IR (thin film) 3412, 3039, 2924, 1738, 1601, 1500, 1330, 1179  $\text{cm}^{-1}$ .

HRMS (CI<sup>+</sup>) Calcd for  $\text{C}_{23}\text{H}_{24}\text{NO}_2$   $[\text{M}+\text{H}]^+$ : 346.1807, found: 346.1809.

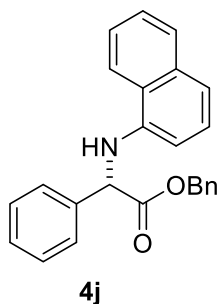

**Benzyl (S)-2-(naphthalen-1-ylamino)-2-phenylacetate (4j)** was prepared as a light-yellow oil according to the General Procedure D (96 h at  $-10\text{ }^{\circ}\text{C}$ , eluent: *n*-hexane/EtOAc = 10:1, 68.3 mg, 93% yield, 96% ee).

$[\alpha]_{\text{D}}^{25}$ :  $-76.3$  ( $c = 1.0$ ,  $\text{CH}_2\text{Cl}_2$ ). HPLC analysis of the product: Daicel CHIRALPAK<sup>®</sup> IC column; 5% *i*-PrOH in *n*-hexane; 1.0 mL/min; retention times: 7.2 min (major), 6.1 min (minor).

<sup>1</sup>H NMR (400 MHz,  $\text{CD}_2\text{Cl}_2$ )  $\delta$  7.91 – 7.89 (m, 1H), 7.67 – 7.65 (m, 1H), 7.47 – 7.44 (m, 2H), 7.38 – 7.33 (m, 2H), 7.27 – 7.15 (m, 6H), 7.11 – 7.03 (m, 4H), 6.25 – 6.23 (m, 1H), 5.68 (d,  $J = 5.4$  Hz, 1H), 5.21 (d,  $J = 5.4$  Hz, 1H), 5.12 – 5.02 (m, 2H) ppm.

<sup>13</sup>C NMR (100 MHz,  $\text{CD}_2\text{Cl}_2$ )  $\delta$  171.7, 141.0, 137.5, 135.5, 134.4, 128.9, 128.6, 128.53,

128.48, 128.3, 127.8, 127.4, 126.3, 126.0, 125.0, 123.5, 120.1, 118.0, 105.6, 67.4, 60.9 ppm.

IR (thin film) 3426, 3049, 2947, 1735, 1582, 1524, 1474, 1405, 1311, 1171  $\text{cm}^{-1}$ .

HRMS (CI+) Calcd for  $\text{C}_{25}\text{H}_{22}\text{NO}_2$   $[\text{M}+\text{H}]^+$ : 368.1651, found: 368.1653.

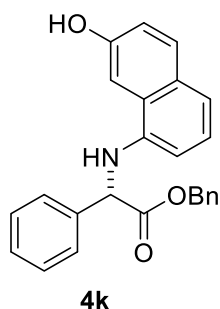

**Benzyl (S)-2-((7-hydroxynaphthalen-1-yl)amino)-2-phenylacetate (4k)** was prepared as a light yellow oil according to the General Procedure D (78 h at  $-10\text{ }^{\circ}\text{C}$ , eluent: *n*-hexane/EtOAc = 10:1 to 5:1, 39.9 mg, 52% yield, 79% ee). The yield was >95% based on recovered starting material.

$[\alpha]_{\text{D}}^{25}$ :  $-60.4$  ( $c = 1.0$ ,  $\text{CH}_2\text{Cl}_2$ ). HPLC analysis of the product: Daicel CHIRALPAK<sup>®</sup> IC column; 15% *i*-PrOH in *n*-hexane; 1.0 mL/min; retention times: 11.2 min (major), 8.4 min (minor).

<sup>1</sup>H NMR (400 MHz, acetone- $d_6$ )  $\delta$  8.68 (s, 1H), 7.71 (d,  $J = 8.8$  Hz, 1H), 7.67 – 7.64 (m, 2H), 7.46 (d,  $J = 2.0$  Hz, 1H), 7.42 – 7.34 (m, 3H), 7.33 – 7.30 (m, 3H), 7.28 – 7.24 (m, 2H), 7.18 – 7.15 (m, 2H), 7.00 (t,  $J = 7.8$  Hz, 1H), 6.44 (d,  $J = 7.5$  Hz, 1H), 5.72 (d,  $J = 6.0$  Hz, 1H), 5.45 (d,  $J = 6.0$  Hz, 1H), 5.30 – 5.20 (m, 2H) ppm.

<sup>13</sup>C NMR (100 MHz, acetone- $d_6$ )  $\delta$  171.8, 155.0, 140.1, 138.0, 136.0, 130.1, 129.1, 128.7, 128.4, 128.2, 128.0, 127.7, 127.5, 125.2, 123.1, 118.0, 117.8, 106.2, 102.7, 66.8, 60.7 ppm.

IR (thin film) 3400, 3041, 2989, 2801, 1740, 1643, 1516, 1506, 1410, 1379, 1200  $\text{cm}^{-1}$ .

HRMS (CI+) Calcd for  $\text{C}_{25}\text{H}_{22}\text{NO}_3$   $[\text{M}+\text{H}]^+$ : 384.1600, found: 384.1601.

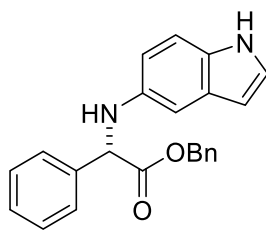

**4l**

**Benzyl (S)-2-((1H-indol-5-yl)amino)-2-phenylacetate (4l)** was prepared as a light yellow oil according to the General Procedure D (78 h at  $-10\text{ }^{\circ}\text{C}$ , eluent: *n*-hexane/EtOAc = 10:1 to 5:1, 65.6 mg, 92% yield, 96% ee).

$[\alpha]_{\text{D}}^{25}$ : +54.6 ( $c = 1.0$ ,  $\text{CH}_2\text{Cl}_2$ ). HPLC analysis of the product: Daicel CHIRALPAK<sup>®</sup> IC column; 15% *i*-PrOH in *n*-hexane; 1.0 mL/min; retention times: 29.9 min (major), 21.9 min (minor).

<sup>1</sup>H NMR (400 MHz,  $\text{CD}_2\text{Cl}_2$ )  $\delta$  8.14 (br, 1H), 7.64 – 7.61 (m, 2H), 7.47 – 7.36 (m, 6H), 7.29 – 7.22 (m, 3H), 7.13 (t,  $J = 2.8$  Hz, 1H), 6.82 – 6.81 (m, 1H), 6.74 – 6.72 (m, 1H), 6.39 – 6.37 (m, 1H), 5.31 – 5.18 (m, 3H), 4.83 (br, 1H) ppm.

<sup>13</sup>C NMR (100 MHz,  $\text{CD}_2\text{Cl}_2$ )  $\delta$  172.3, 140.1, 138.2, 135.7, 130.4, 128.8, 128.7, 128.5, 128.3, 128.2, 127.8, 127.5, 124.7, 112.4, 111.8, 103.1, 101.5, 67.1, 62.1 ppm.

IR (thin film) 3410, 3046, 2930, 1735, 1582, 1470, 1311, 1230, 1173  $\text{cm}^{-1}$ .

HRMS (CI<sup>+</sup>) Calcd for  $\text{C}_{23}\text{H}_{21}\text{N}_2\text{O}_2$   $[\text{M}+\text{H}]^+$ : 357.1603, found: 357.1615.

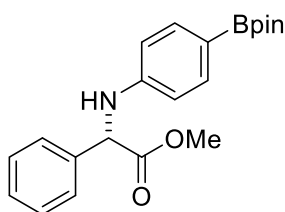

**4m**

**Methyl (S)-2-phenyl-2-((4-(4,4,5,5-tetramethyl-1,3,2-dioxaborolan-2-yl)phenyl)amino)acetate (4m)** was prepared as a white solid according to the General Procedure D (83 h at  $-10\text{ }^{\circ}\text{C}$ , eluent: *n*-hexane/EtOAc = 10:1 to 5:1, 55.1 mg, 75% yield, 94% ee).

$[\alpha]_{\text{D}}^{25}$ : +98.9 ( $c = 1.0$ ,  $\text{CH}_2\text{Cl}_2$ ). HPLC analysis of the product: Daicel CHIRALPAK<sup>®</sup> IC column; 10% *i*-PrOH in *n*-hexane; 1.0 mL/min; retention times: 5.6 min (major), 7.7 min (minor).



$^1\text{H NMR}$  (400 MHz,  $\text{CD}_2\text{Cl}_2$ )  $\delta$  7.56 – 7.51 (m, 4H), 7.43 – 7.34 (m, 3H), 6.59 (d,  $J = 8.5$  Hz, 2H), 5.28 (d,  $J = 5.7$  Hz, 1H), 5.20 (d,  $J = 5.7$  Hz, 1H), 3.76 (s, 3H), 1.32 (s, 12H) ppm.

$^{13}\text{C NMR}$  (100 MHz,  $\text{CD}_2\text{Cl}_2$ )  $\delta$  171.9, 148.4, 137.5, 136.1, 128.8 (2C), 128.3, 127.2, 112.5, 83.2, 60.0, 52.7, 24.64, 24.59 ppm.

**IR** (thin film) 3410, 3042, 2979, 1740, 1604, 1531, 1475, 1358, 1319, 1143, 1087  $\text{cm}^{-1}$ .

**HRMS** (CI+) Calcd for  $\text{C}_{21}\text{H}_{27}\text{BNO}_4$   $[\text{M}+\text{H}]^+$ : 368.2033, found: 368.2039.

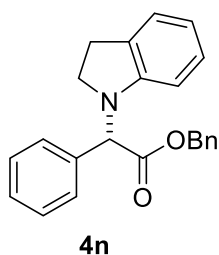

**Benzyl (S)-2-(indolin-1-yl)-2-phenylacetate (4n)** was prepared as a light yellow oil according to the General Procedure D (84 h at  $-10$   $^\circ\text{C}$ , eluent: *n*-hexane/EtOAc = 10:1, 62.5 mg, 91% yield, 57% ee).

$[\alpha]_{\text{D}}^{25}$ : +68.9 ( $c = 1.0$ ,  $\text{CH}_2\text{Cl}_2$ ). HPLC analysis of the product: Daicel CHIRALPAK<sup>®</sup> IC column; 1% *i*-PrOH in *n*-hexane; 1.0 mL/min; retention times: 15.0 min (major), 7.6 min (minor).

$^1\text{H NMR}$  (400 MHz,  $\text{CD}_2\text{Cl}_2$ )  $\delta$  7.46 – 7.29 (m, 10H), 7.15 – 7.05 (m, 2H), 6.77 – 6.73 (m, 1H), 6.50 (d,  $J = 7.8$  Hz, 1H), 5.43 (s, 1H), 5.30 – 5.22 (m, 2H), 3.73 – 3.66 (m, 1H), 3.20 – 3.14 (m, 1H), 3.04 – 2.88 (m, 2H) ppm.

$^{13}\text{C NMR}$  (100 MHz,  $\text{CD}_2\text{Cl}_2$ )  $\delta$  171.0, 151.0, 135.7, 135.2, 130.4, 128.8, 128.7, 128.5, 128.33, 128.25, 128.2, 127.1, 124.6, 118.3, 106.8, 66.7, 63.7, 49.8, 28.1 ppm.

**IR** (thin film) 3040, 2946, 2858, 1737, 1602, 1481, 1383, 1326, 1237, 1154  $\text{cm}^{-1}$ .

**HRMS** (CI+) Calcd for  $\text{C}_{23}\text{H}_{22}\text{NO}_2$   $[\text{M}+\text{H}]^+$ : 344.1651, found: 344.1660.

## IV. Gram-Scale Reaction

### Gram-Scale Synthesis of 3a

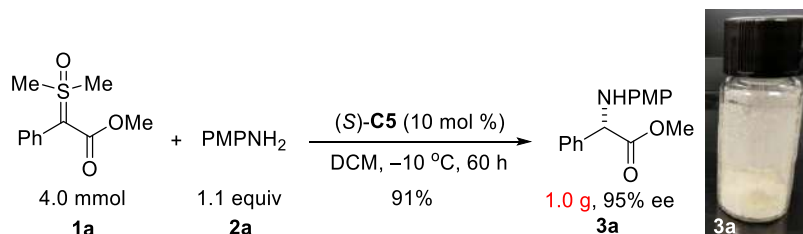

The sulfoxonium ylide **1a** (905 mg, 4 mmol, 1.0 equiv) and catalyst **(S)-C5** (340 mg, 0.4 mmol, 0.1 equiv) were added to a 50-mL flask equipped with a magnetic stir bar. The flask was carefully sealed with a rubber stopper and cooled to  $-10\text{ }^{\circ}\text{C}$ . Then, DCM (20 mL) was injected into the flask, and the suspension was stirred at  $-10\text{ }^{\circ}\text{C}$  for 15 min followed by slow addition of a solution of aniline **2a** (542 mg, 4.4 mmol, 1.1 equiv) in DCM (2.0 mL). The reaction mixture was stirred at the same temperature and the progress was monitored by TLC. Upon completion ( $\sim 60\text{ h}$ ), a clear reaction solution was obtained, and it was directly subjected to flash column chromatography on silica gel (eluent: *n*-hexane/EtOAc = 10:1) to afford the desired product **3a** as a light yellow solid (1.0 g, 91% yield, 95% ee). Moreover, the CPA catalyst **(S)-C5** was also recovered in 95% yield (eluent: DCM/MeOH = 50:1).

*Note: Regular ACS grade solvent (DCM) was used for this reaction.*

## V. Mechanistic Study

### (1) Non-linear effect

#### a) 10 mol% C5 at -10 °C

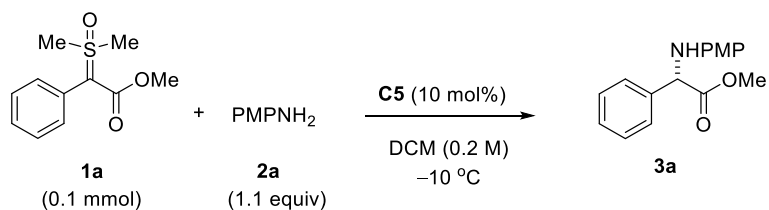

| entry | ee of <b>C5</b> (%) | ee of <b>3a</b> (%) |
|-------|---------------------|---------------------|
| 1     | >99                 | 96                  |
| 2     | 80                  | 87                  |
| 3     | 60                  | 79                  |
| 4     | 40                  | 68                  |
| 5     | 20                  | 50                  |
| 6     | 0                   | 0                   |

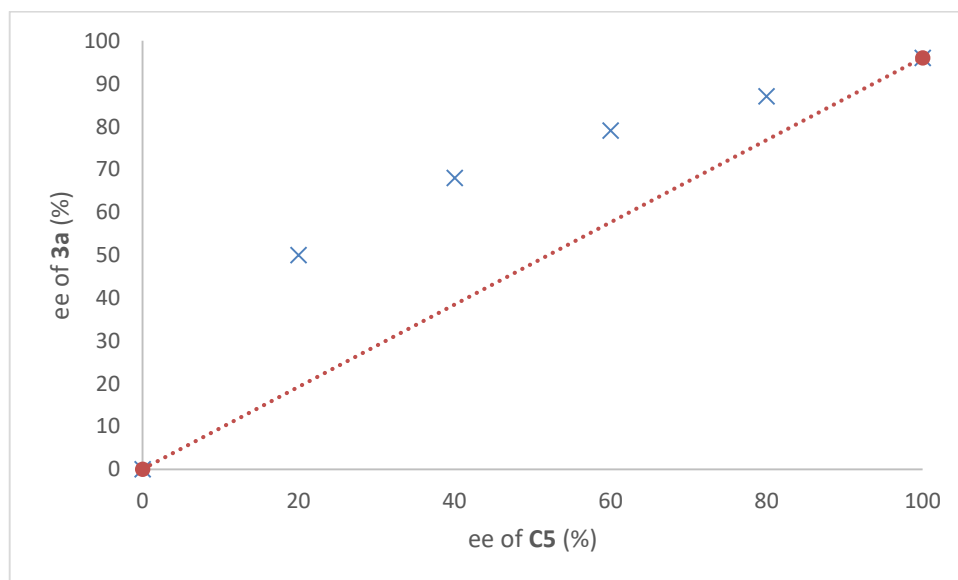

b) 5 mol % C5 at -10 °C

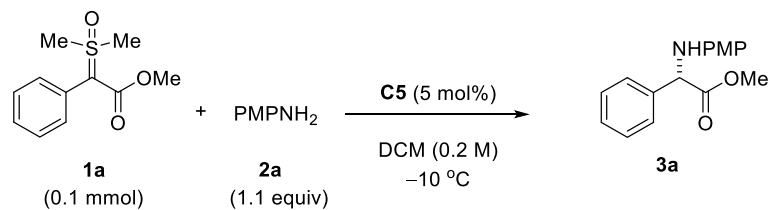

| entry | ee of C5 (%) | ee of 3a (%) |
|-------|--------------|--------------|
| 1     | >99          | 95           |
| 2     | 80           | 88           |
| 3     | 60           | 78           |
| 4     | 40           | 57           |
| 5     | 20           | 34           |
| 6     | 0            | 0            |

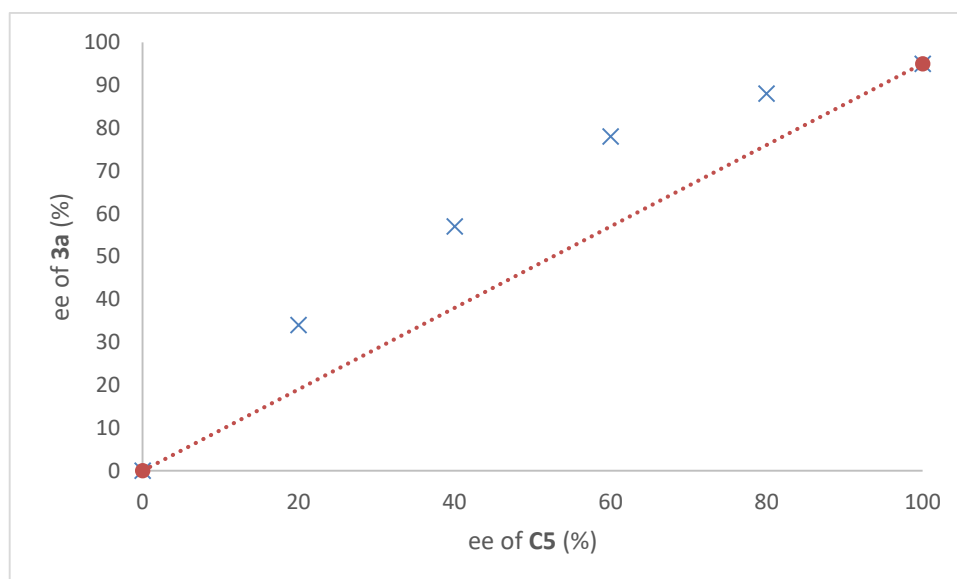

c) 5 mol% C5 at 25 °C

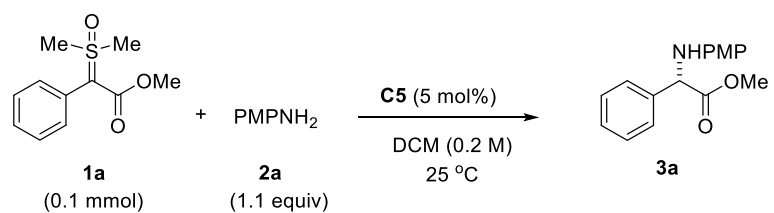

| entry | ee of C5 (%) | ee of 3a (%) |
|-------|--------------|--------------|
| 1     | >99          | 90           |
| 2     | 80           | 73           |
| 3     | 60           | 55           |
| 4     | 40           | 40           |
| 5     | 20           | 21           |
| 6     | 0            | 0            |

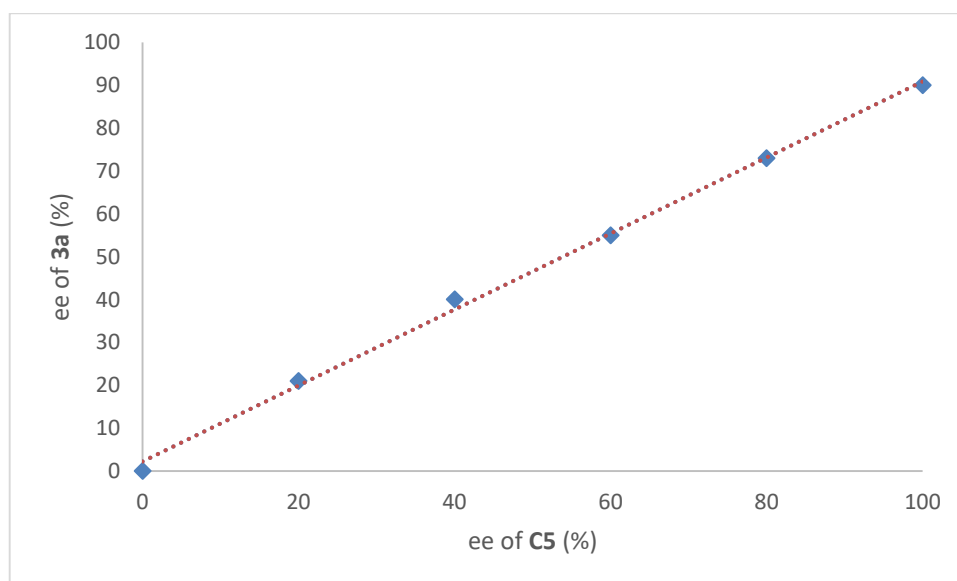

## d) The overlapped plot

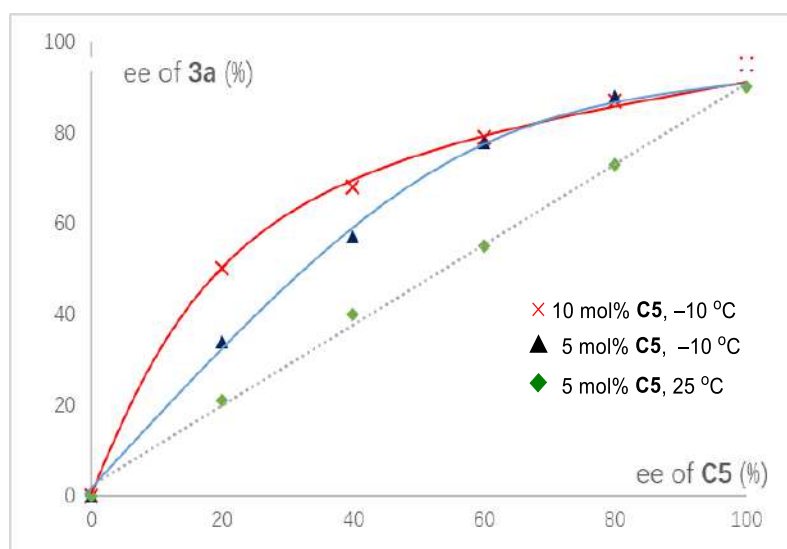

## (2) Precipitation studies

The solubility of the optically pure and racemic catalyst **C5** (10 mol%, 0.02 M) was compared in DCM at 25 °C and -10 °C, respectively, to find the cause of asymmetric amplification.

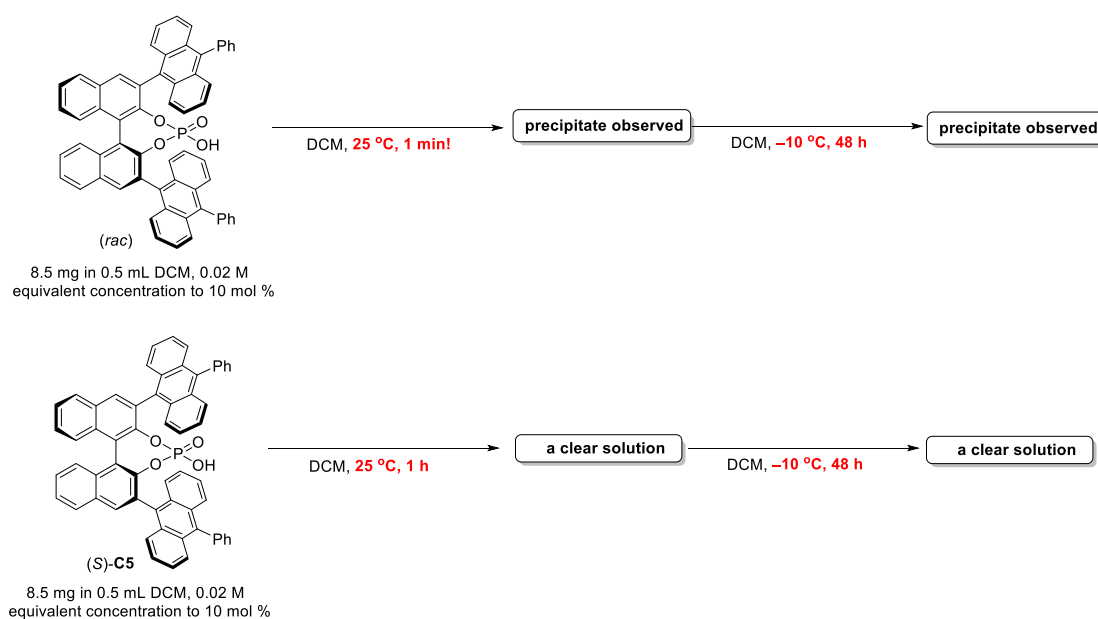

We observed that precipitate was immediately formed in less than 1 min after mixing of DCM solutions of (*R*) and (*S*)-C5 (4.25 mg in 0.25 mL DCM, respectively). However, the solution of enantiopure C5 kept homogeneous at room temperature even after over 1 h. Moreover, the DCM solution of racemic C5 remained turbid after stirring at  $-10\text{ }^{\circ}\text{C}$  for 48 h. In contrast, the solution of enantiopure sample remained homogeneous for 48 h at the same temperature.

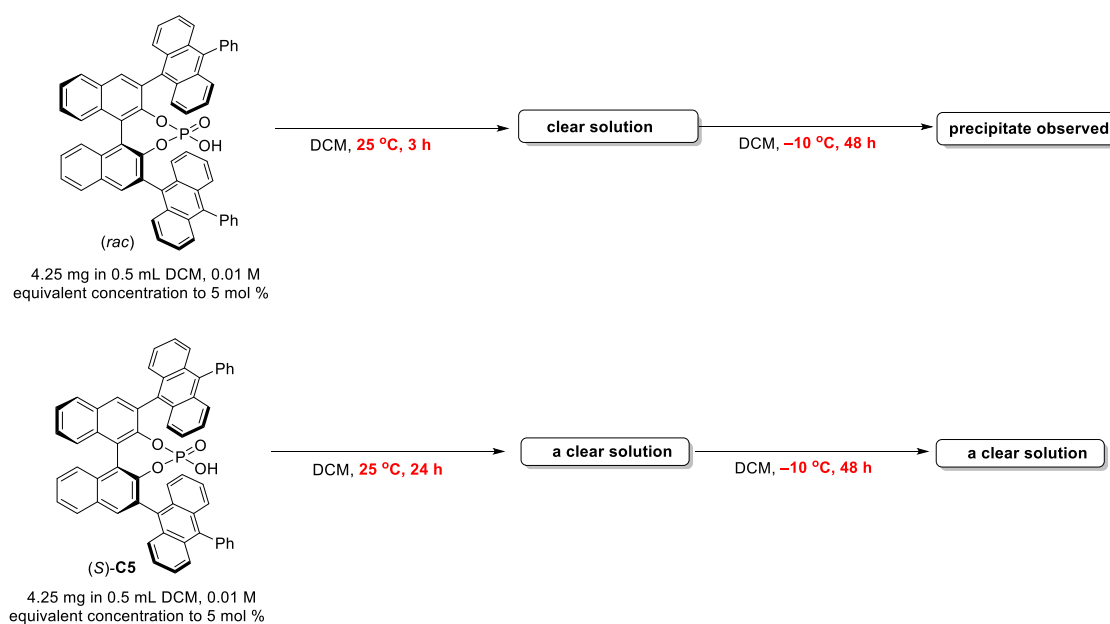

In the meantime, reducing the catalyst loading to 5 mol%, clear DCM solutions of both samples were observed at room temperature, even after an extended period of 3 h, and 24 h, respectively. However, a solution of the racemic sample gradually became turbid when cooling to  $-10\text{ }^{\circ}\text{C}$  in 48 h.

### (3) Kinetic isotope effect (KIE)

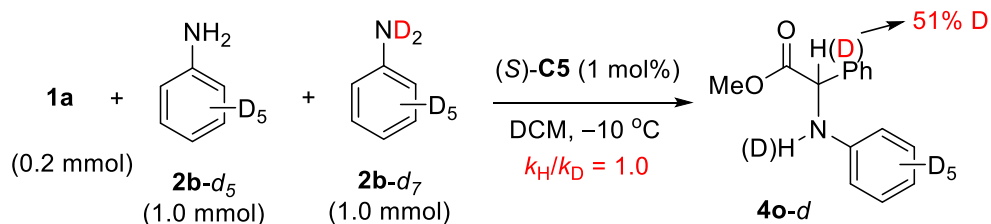

At room temperature, to an oven-dried 4 mL vial were added sulfoxonium ylide **1a** (0.2 mmol, 45.2 mg, 1.0 equiv), and (S)-C5 (17.0 mg, 1 mol%). Then, the vial was sealed with a puncturable screw cap and cooled down to  $-10\text{ }^\circ\text{C}$ , aniline **2b-d<sub>5</sub>** (98 mg, 1.0 mmol, 5.0 equiv), and aniline **2b-d<sub>7</sub>** (102 mg, 1.0 mmol, 5.0 equiv) in  $\text{CD}_2\text{Cl}_2$  (1.0 mL) was injected into the vial. The reaction mixture was stirred at the same temperature until full conversion of **1a** (48 h). The mixture was transferred to an NMR tube for analysis, which indicated 51% D-incorporation at the  $\alpha$ -position in the **4o-d** product.

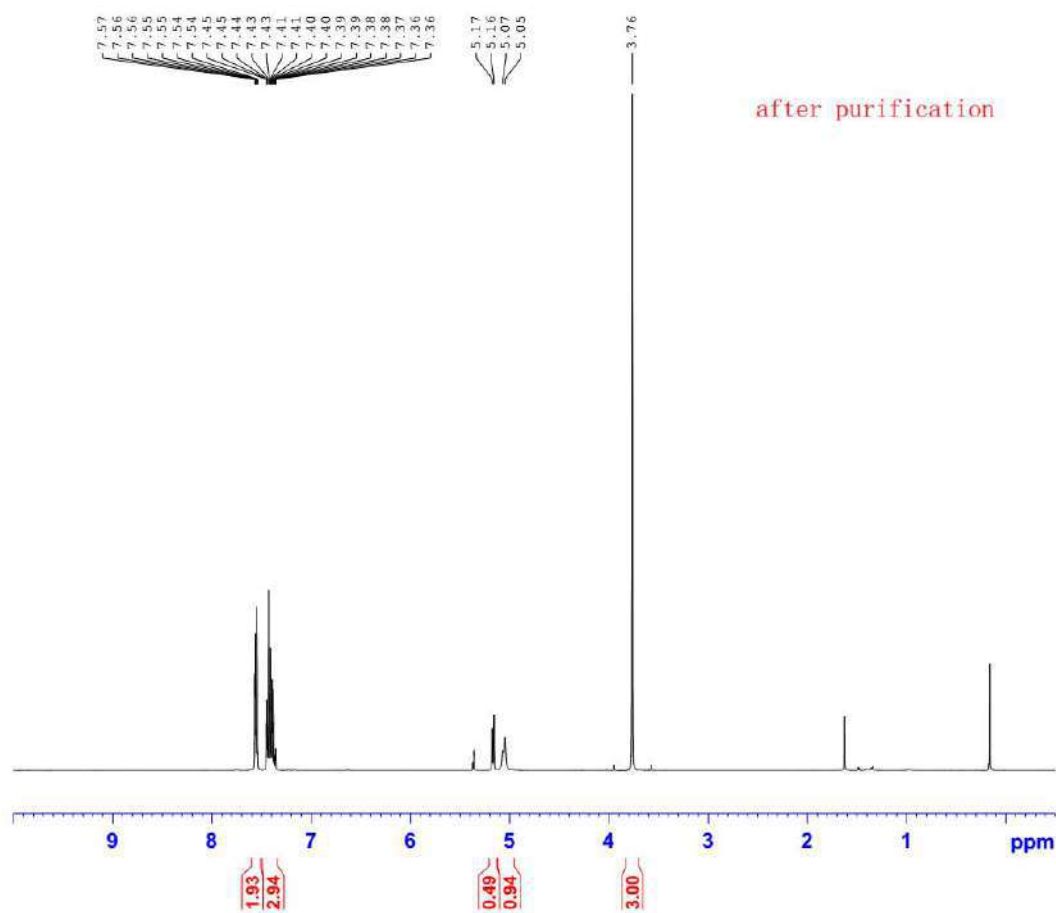



#### (4) In situ NMR kinetic analysis

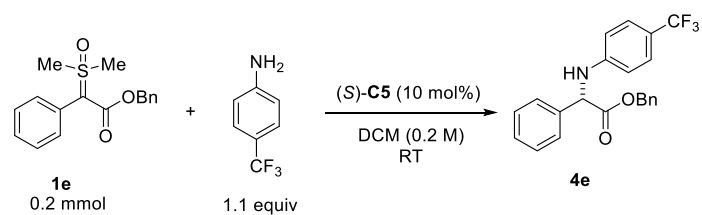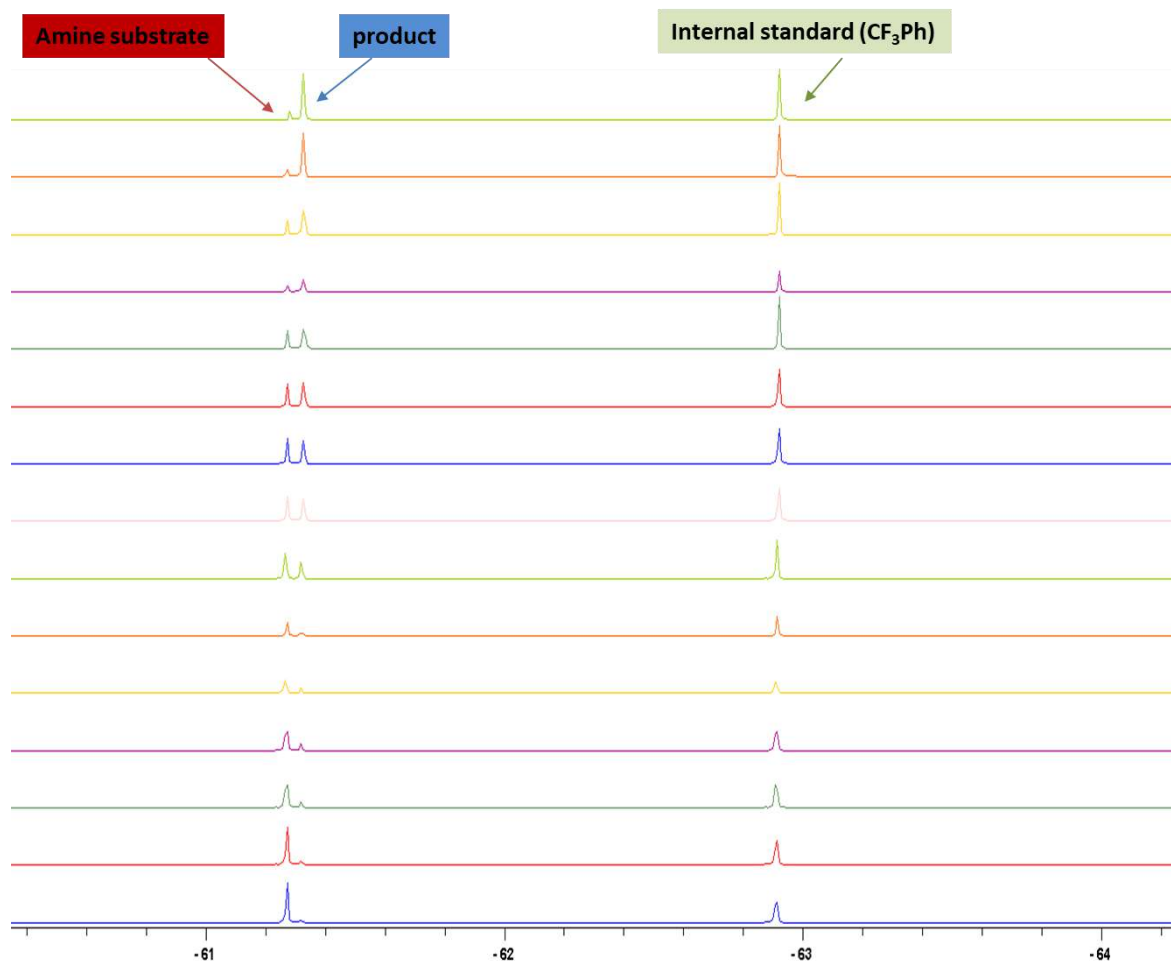

$^{19}\text{F}$  NMR spectra overlaid in about 0.5 – 3 h intervals ( $t = 0.5$  h on the bottom,  $t = 21$  h at the top)

The points were collected from t = 0 to 21 h. The product NMR yield was determined by  $^{19}\text{F}$  NMR using benzotrifluoride as an internal standard.

| time/h | product(%) | amine(%) |
|--------|------------|----------|
| 0.00   | 0.00       | 110.00   |
| 0.52   | 8.25       | 101.75   |
| 1.02   | 12.00      | 98.00    |
| 1.52   | 17.65      | 92.35    |
| 2.03   | 21.00      | 89.00    |
| 2.52   | 23.40      | 86.60    |
| 3.27   | 29.60      | 80.40    |
| 6.63   | 44.85      | 65.15    |
| 8.80   | 58.35      | 51.65    |
| 9.02   | 58.85      | 51.15    |
| 10.47  | 63.95      | 46.05    |
| 12.10  | 69.10      | 40.90    |
| 14.12  | 75.10      | 34.90    |
| 16.20  | 82.30      | 27.70    |
| 18.53  | 89.35      | 20.65    |
| 21.02  | 91.90      | 18.10    |

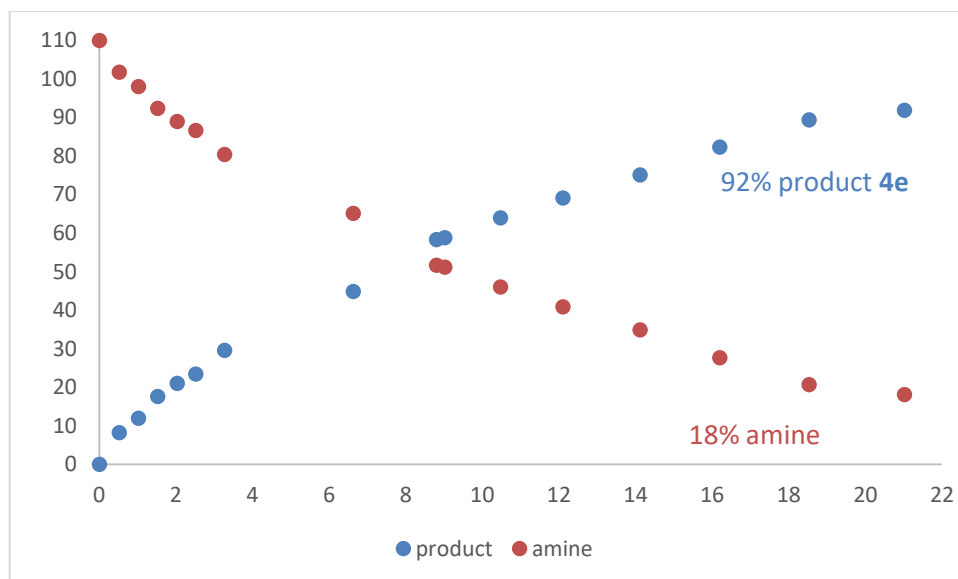

### (5) The Hammett plot

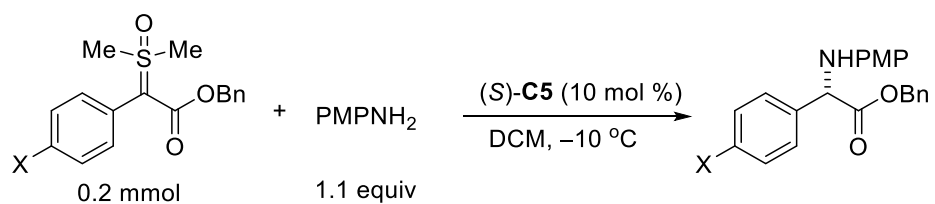

| substituent     | $\sigma_{para}$ | log(e.r.) | e.r.                  |
|-----------------|-----------------|-----------|-----------------------|
| Cl              | 0.23            | 1.51      | 97:3                  |
| CF <sub>3</sub> | 0.54            | 1.33      | 95.5:4.5              |
| Me              | -0.17           | 1.69      | 98.0:2.0 <sup>a</sup> |
| H               | 0               | 1.59      | 97.5:2.5              |

<sup>a</sup> Reaction at -10 °C

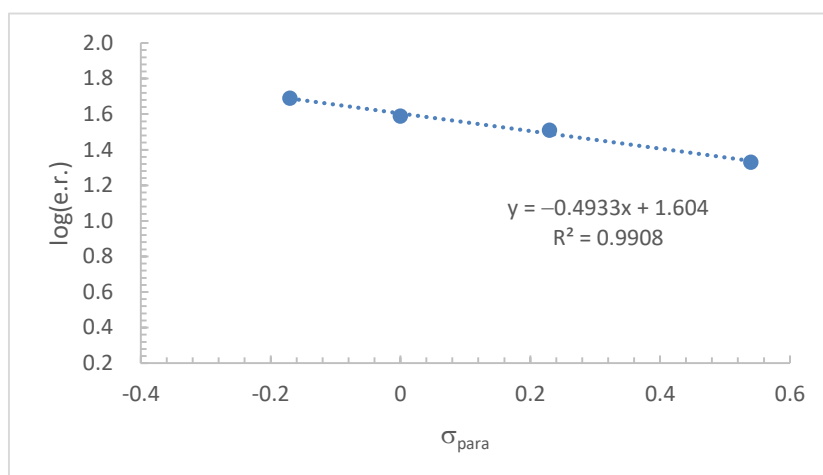

### (6) $^{31}\text{P}$ NMR titration

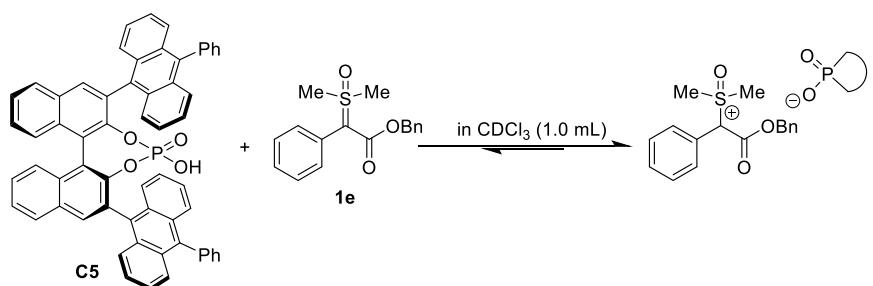

| C5 [M] | 1e [M] <sup>a</sup> | 1e/C5  | $\delta$ ( $^{31}\text{P}$ NMR) ppm |
|--------|---------------------|--------|-------------------------------------|
| 0.0489 | 0.0000              | 0      | 0.6291                              |
| 0.0489 | 0.0060              | 0.1227 | 0.2822                              |
| 0.0489 | 0.0097              | 0.1984 | -0.0556                             |
| 0.0489 | 0.0195              | 0.3988 | 0.252                               |
| 0.0489 | 0.0337              | 0.6892 | 2.4829                              |
| 0.0489 | 0.0480              | 0.9816 | 4.5831                              |
| 0.0489 | 0.0620              | 1.2679 | 4.5946                              |
| 0.0489 | 0.0747              | 1.5276 | 4.5941                              |
| 0.0489 | 0.0967              | 1.9775 | 4.5921                              |

<sup>a</sup> Determined by using  $\text{CH}_2\text{Br}_2$  as an internal standard.

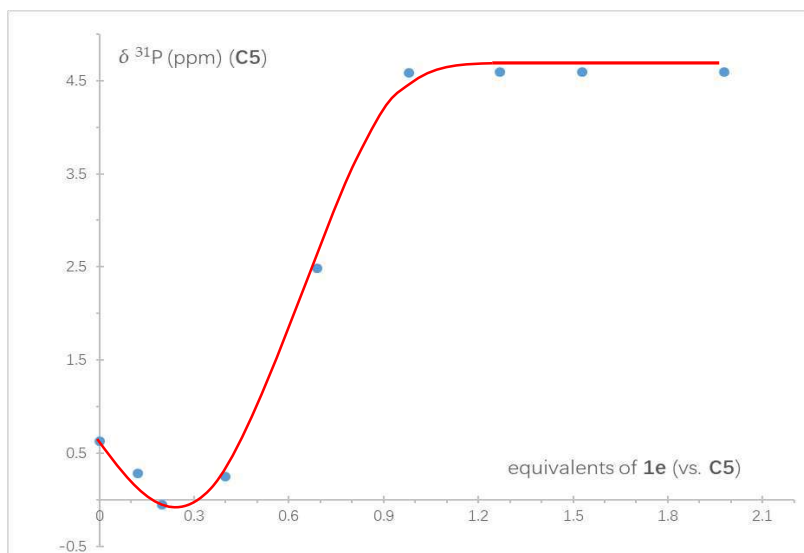

### (7) Product ee dependence on time.

The enantiopurity of the product kept unchanged with conversion (Conv. < 90% in less than 8 min) and reaction time, indicating the stereinduction is not affected by the in situ generated DMSO byproduct.

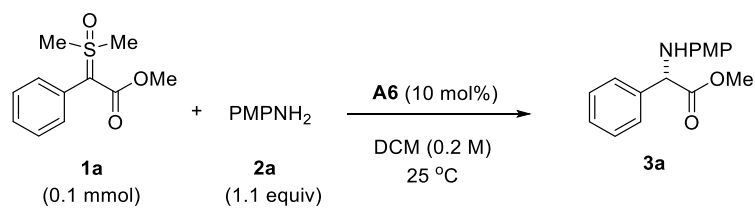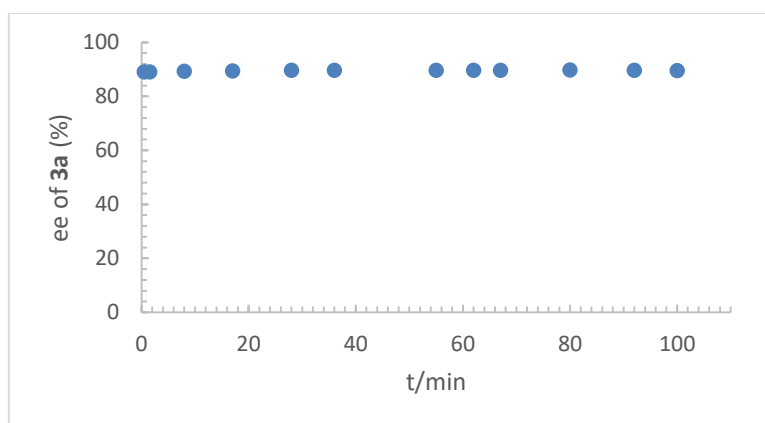

(8)  $^{31}\text{P}$  NMR study of the reaction species involved

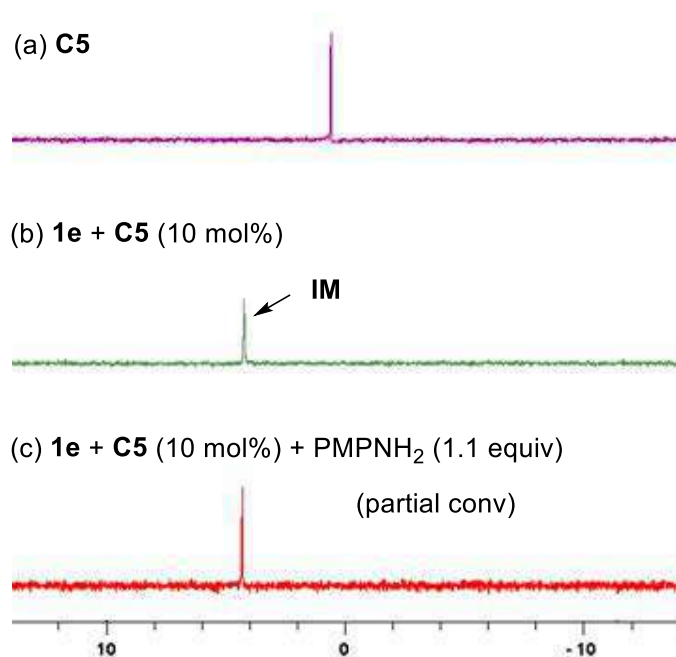

(a) (*S*)-**C5** in  $\text{CD}_2\text{Cl}_2$  (purple, 0.58 ppm);

(b) **1e** + (*S*)-**C5** (green, 0.1 mmol **1e**, 10 mol% **C5**, 4.23 ppm);

(c) **1e** + (*S*)-**C5** + PMPNH<sub>2</sub> (0.1 mmol **1e**, 1.1 equiv PMPNH<sub>2</sub>, 10 mol% **C5**, red, 4.30 ppm).

## VI. Sensitivity Assessment

The results of the sensitivity assessment are shown in Table S3, which was conducted using the model reaction of sulfoxonium **1a** with PMPNH<sub>2</sub> **2a**. The optimized conditions were chosen as the reference for comparison. Tables S3 and S4 describe the results on yield and enantioselectivity, respectively.

**Table S3.** Sensitivity assessment on the yield of **3a**<sup>a</sup>

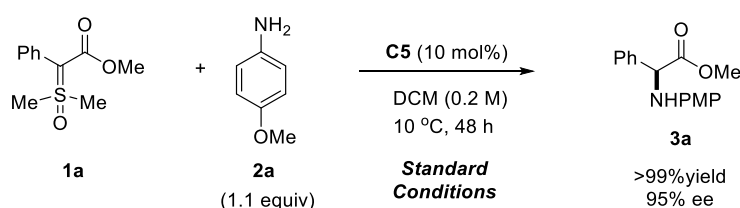

| Entry          | Deviation from standard conditions | Symbol                | Yield <b>3a</b> (%) <sup>b</sup> | Deviation (%) |
|----------------|------------------------------------|-----------------------|----------------------------------|---------------|
| 1              | /                                  |                       | >99                              | /             |
| 2              | [ <b>1a</b> ] = 0.4 M              | High <i>c</i>         | >99                              | 0             |
| 3              | [ <b>1a</b> ] = 0.1 M              | Low <i>c</i>          | 95                               | -5            |
| 4 <sup>c</sup> | +1 vol% H <sub>2</sub> O           | Low H <sub>2</sub> O  | >99                              | 0             |
| 5 <sup>d</sup> | +10 vol% H <sub>2</sub> O          | High H <sub>2</sub> O | >99                              | 0             |
| 6 <sup>e</sup> | 1 atm O <sub>2</sub>               | High O <sub>2</sub>   | >99                              | 0             |
| 7              | T = -20 °C                         | Low T                 | >99                              | 0             |
| 8              | T = 0 °C                           | High T                | >99                              | 0             |
| 9              | 5 mol % C5                         | Low Cat.              | 92                               | -8            |
| 10             | 20 mol % C5                        | High Cat.             | >99                              | 0             |
| 11             | Standard Conditions*20             | Big Scale             | >99                              | 0             |

<sup>a</sup> Unless otherwise noted, the results are the average of two independent experiments under identical reaction conditions. <sup>b</sup> Yield was determined by <sup>1</sup>H NMR using CH<sub>2</sub>Br<sub>2</sub> as the internal standard. <sup>c</sup> Run with 10 μL of saturated aqueous NaCl solution. <sup>d</sup> Run with 100 μL of saturated aqueous NaCl solution. <sup>e</sup> Molecular oxygen in balloon.

**Table S4.** Sensitivity assessment on enantioselectivity<sup>a</sup>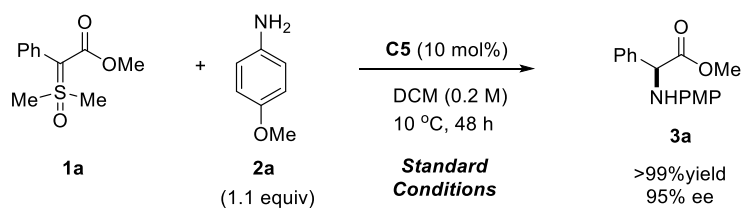

| Entry          | Deviation from standard conditions | Symbol                | Ee of <b>3a</b> (%) <sup>b</sup> | Deviation (%) |
|----------------|------------------------------------|-----------------------|----------------------------------|---------------|
| 1              | /                                  |                       | 95                               | /             |
| 2              | [ <b>1a</b> ] = 0.4 M              | High <i>c</i>         | 95                               | 0             |
| 3              | [ <b>1a</b> ] = 0.1 M              | Low <i>c</i>          | 96                               | +1            |
| 4 <sup>c</sup> | +1 vol% H <sub>2</sub> O           | Low H <sub>2</sub> O  | 95                               | 0             |
| 5 <sup>d</sup> | +10 vol% H <sub>2</sub> O          | High H <sub>2</sub> O | 95                               | 0             |
| 6 <sup>e</sup> | 1 atm O <sub>2</sub>               | High O <sub>2</sub>   | 95                               | 0             |
| 7              | T = -20 °C                         | Low T                 | 96                               | +1            |
| 8              | T = 0 °C                           | High T                | 93                               | -2            |
| 9              | 5 mol% <b>C5</b>                   | Low Cat.              | 96                               | +1            |
| 10             | 20 mol% <b>C5</b>                  | High Cat.             | 95                               | 0             |
| 11             | Standard Conditions*20             | Big Scale             | 95                               | 0             |

<sup>a</sup> Unless otherwise noted, the results are the average of two independent experiments under identical reaction conditions. <sup>b</sup> Yield was determined by <sup>1</sup>H NMR using CH<sub>2</sub>Br<sub>2</sub> as the internal standard. <sup>c</sup> Run with 10 μL of saturated aqueous NaCl solution. <sup>d</sup> Run with 100 μL of saturated aqueous NaCl solution. <sup>e</sup> Molecular oxygen in balloon.



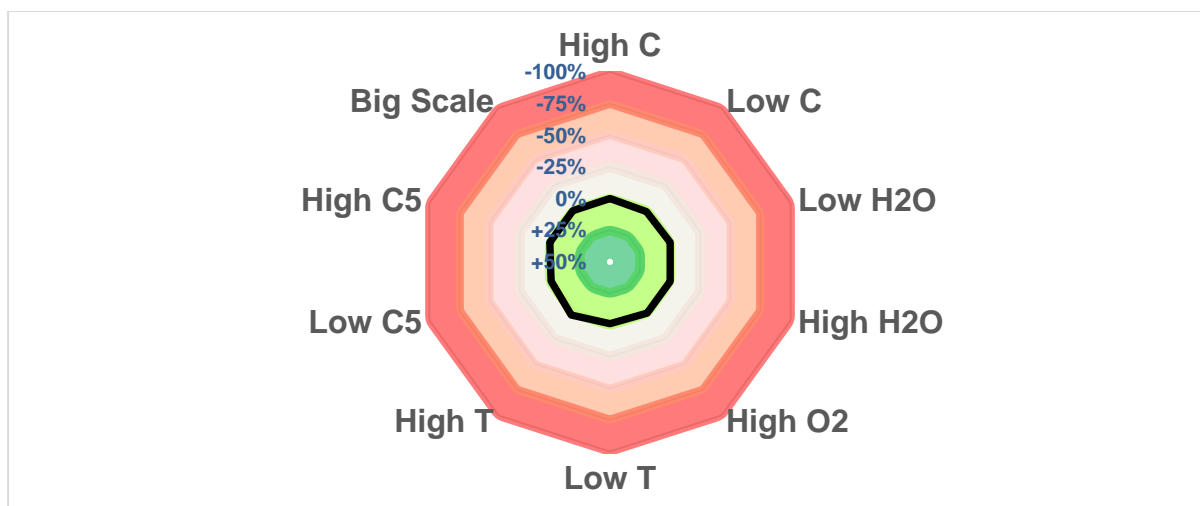

**Figure S1.** Sensitivity assessment on reaction yield yields.

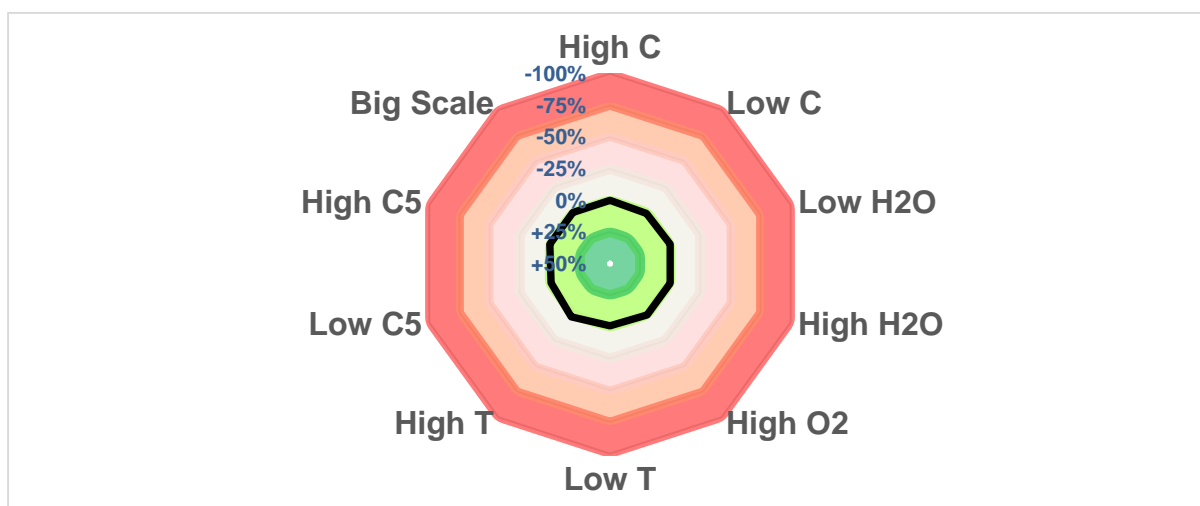

**Figure S2.** Sensitivity assessment on enantioselectivity.

The original method of sensitivity assessment was developed by Glorius and coworkers.<sup>6</sup> In the case of substrate concentrations, 0.4 M and 0.1 M were denoted as “high *c*” and “low *c*”, respectively. Marginal different values in NMR yields and ee of **3a** were obtained (entries 2–3, Tables S3–4). In addition, for the concentration of water, +1 vol% H<sub>2</sub>O (10 μL brine) and +10 vol% H<sub>2</sub>O (100 μL brine) were denoted as “Low H<sub>2</sub>O” and “High H<sub>2</sub>O”, respectively. To our delight, our reaction is insensitive to the concentration of water, and essentially same yield and enantioselectivity were

<sup>6</sup> L. Pitzer, F. Schäfers, and F. Glorius. *Angew. Chem., Int. Ed.* **2019**, *58*, 8572–8576.

afforded (entries 4–5, Tables S3–4). When the reactions were conducted under the atmosphere of oxygen, the outcome also remained same (entry 6, Tables S3–4). Moreover, a slightly lower enantioselectivity was observed at 0 °C (93% ee, entries 7–8, Tables S3–4)

Our reaction is also insensitive to catalyst loading. The enantioselectivity remained same when the catalyst loading was increased or decreased (to 20 mol% or 5 mol%) (entries 9–10, Tables S3–4). Finally, a 20-fold scale-up reaction was also assessed, leading to the same outcome.

These findings were illustrated clearly in the radar diagram (Figure S1 and S2). In conclusion, this chiral phosphoric acid catalyzed N–H insertion reaction of sulfoxonium ylide is an eminently robust reaction.

## VII. Determination of the Product Stereochemistry

The absolute stereochemistry of the  $\alpha$ -aryl glycines products were based on (1) comparison of the optical rotation value of **3a** with the literature value and (2) single crystal X-ray crystallography of **3f**. The X-ray data have been deposited at the Cambridge Crystallographic Data Center (CCDC 2080963). The stereochemistry of other products was assumed by analogy.

### (a) Comparison of the optical rotation value with the literature data.

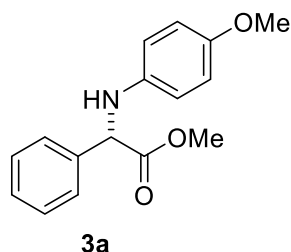

The literature optical rotation value for (*S*)-**3a** in 91% ee was reported to be  $[\alpha]_{\text{D}}^{25} = +100.0$  ( $c = 0.88$ , DCM).<sup>7</sup> The measured value of our product in 95% ee was  $[\alpha]_{\text{D}}^{25} = +106.1$  ( $c = 1.0$ , DCM). Thus, the absolute configuration of our product was assigned to be *S*.

### (b) X-ray crystallography.

The proper chiral single crystal was obtained by slow evaporation of a diethyl ether solution of **3f** at 25 °C (0.2 mmol in 5 mL Et<sub>2</sub>O).

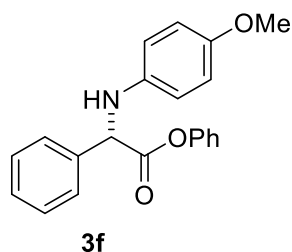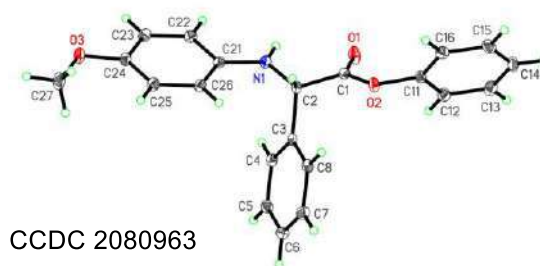

6 X.-H. Hu, X.-P. Hu, *Adv. Syn. Catal.* **2019**, *361*, 5063–5068.

**Table S5. Crystal data and structure refinement for 3f.**

|                                             |                                                               |
|---------------------------------------------|---------------------------------------------------------------|
| Identification code                         | <b>3f</b>                                                     |
| Empirical formula                           | C <sub>21</sub> H <sub>19</sub> NO <sub>3</sub>               |
| Formula weight                              | 333.37                                                        |
| Temperature/K                               | 99.93(17)                                                     |
| Crystal system                              | monoclinic                                                    |
| Space group                                 | C2                                                            |
| a/Å                                         | 20.2280(4)                                                    |
| b/Å                                         | 7.9448(2)                                                     |
| c/Å                                         | 10.7105(2)                                                    |
| α/°                                         | 90                                                            |
| β/°                                         | 94.888(2)                                                     |
| γ/°                                         | 90                                                            |
| Volume/Å <sup>3</sup>                       | 1715.00(6)                                                    |
| Z                                           | 4                                                             |
| ρ <sub>calc</sub> /cm <sup>3</sup>          | 1.291                                                         |
| μ/mm <sup>-1</sup>                          | 0.696                                                         |
| F(000)                                      | 704.0                                                         |
| Crystal size/mm <sup>3</sup>                | 0.05 × 0.05 × 0.03                                            |
| Radiation                                   | CuKα (λ = 1.54184)                                            |
| 2θ range for data collection/°              | 8.286 to 145.13                                               |
| Index ranges                                | -19 ≤ h ≤ 24, -9 ≤ k ≤ 9, -12 ≤ l ≤ 10                        |
| Reflections collected                       | 4868                                                          |
| Independent reflections                     | 3026 [R <sub>int</sub> = 0.0180, R <sub>sigma</sub> = 0.0266] |
| Data/restraints/parameters                  | 3026/1/227                                                    |
| Goodness-of-fit on F <sup>2</sup>           | 1.040                                                         |
| Final R indexes [I ≥ 2σ (I)]                | R <sub>1</sub> = 0.0283, wR <sub>2</sub> = 0.0686             |
| Final R indexes [all data]                  | R <sub>1</sub> = 0.0295, wR <sub>2</sub> = 0.0695             |
| Largest diff. peak/hole / e Å <sup>-3</sup> | 0.23/-0.20                                                    |
| Flack parameter                             | 0.05(10)                                                      |

**Table S6. Fractional Atomic Coordinates (×10<sup>4</sup>) and Equivalent Isotropic Displacement Parameters (Å<sup>2</sup>×10<sup>3</sup>) for 3f. U<sub>eq</sub> is defined as 1/3 of the trace of the orthogonalised U<sub>ij</sub> tensor.**

| Atom           | x          | y           | z           | U(eq)    |
|----------------|------------|-------------|-------------|----------|
| O <sup>1</sup> | 4590.8 (7) | 2350 (2)    | 1341.1 (12) | 24.5 (3) |
| O <sup>2</sup> | 4628.8 (6) | 2994.2 (19) | 3397.1 (12) | 18.2 (3) |
| O <sup>3</sup> | 8668.7 (6) | 2188 (2)    | 1111.5 (12) | 21.4 (3) |
| N <sup>1</sup> | 5933.7 (7) | 2506 (2)    | 1412.8 (14) | 17.2 (3) |
| C <sup>1</sup> | 4892.1 (9) | 2806 (2)    | 2286.2 (17) | 15.5 (4) |

|                 |             |          |             |          |
|-----------------|-------------|----------|-------------|----------|
| C <sup>2</sup>  | 5627.2 (9)  | 3259 (2) | 2435.0 (17) | 14.7 (4) |
| C <sup>3</sup>  | 5705.8 (9)  | 5169 (3) | 2585.9 (17) | 14.9 (4) |
| C <sup>4</sup>  | 5844.1 (9)  | 6177 (3) | 1578.2 (18) | 17.4 (4) |
| C <sup>5</sup>  | 5935.2 (9)  | 7905 (3) | 1741.2 (18) | 20.0 (4) |
| C <sup>6</sup>  | 5884.3 (9)  | 8623 (3) | 2908.3 (19) | 20.8 (4) |
| C <sup>7</sup>  | 5742.1 (10) | 7624 (3) | 3914.9 (18) | 20.9 (4) |
| C <sup>8</sup>  | 5656.2 (10) | 5903 (3) | 3757.6 (18) | 17.3 (4) |
| C <sup>11</sup> | 3942.7 (9)  | 2714 (3) | 3462.0 (17) | 16.8 (4) |
| C <sup>12</sup> | 3469.7 (10) | 3594 (3) | 2724.9 (19) | 20.4 (4) |
| C <sup>13</sup> | 2804.6 (10) | 3340 (3) | 2913 (2)    | 24.1 (5) |
| C <sup>14</sup> | 2626.8 (10) | 2233 (3) | 3830 (2)    | 24.1 (5) |
| C <sup>15</sup> | 3112.8 (10) | 1365 (3) | 4559.8 (19) | 23.5 (5) |
| C <sup>16</sup> | 3776.9 (10) | 1602 (3) | 4372.9 (17) | 18.8 (4) |
| C <sup>21</sup> | 6621.5 (9)  | 2487 (3) | 1380.2 (17) | 15.7 (4) |
| C <sup>22</sup> | 6895.2 (9)  | 1740 (3) | 347.8 (17)  | 17.4 (4) |
| C <sup>23</sup> | 7572.6 (10) | 1667 (3) | 288.2 (18)  | 19.1 (4) |
| C <sup>24</sup> | 8000.6 (9)  | 2332 (3) | 1255.9 (18) | 17.3 (4) |
| C <sup>25</sup> | 7740.4 (9)  | 3055 (3) | 2284.6 (18) | 18.6 (4) |
| C <sup>26</sup> | 7052.2 (9)  | 3131 (3) | 2343.2 (18) | 17.7 (4) |
| C <sup>27</sup> | 9112.4 (10) | 2911 (3) | 2066 (2)    | 28.4 (5) |

**Table S7. Anisotropic Displacement Parameters ( $\text{\AA}^2 \times 10^3$ ) for 3f. The Anisotropic displacement factor exponent takes the form:  $-2\pi^2[h^2a^*2U_{11}+2hka^*b^*U_{12}+\dots]$ .**

| Atom            | U <sub>11</sub> | U <sub>22</sub> | U <sub>33</sub> | U <sub>23</sub> | U <sub>13</sub> | U <sub>12</sub> |
|-----------------|-----------------|-----------------|-----------------|-----------------|-----------------|-----------------|
| O <sup>1</sup>  | 16.1 (6)        | 40.9 (10)       | 16.5 (7)        | -5.1 (6)        | 1.7 (5)         | -5.2 (6)        |
| O <sup>2</sup>  | 13.9 (6)        | 25.7 (8)        | 15.4 (6)        | -1.8 (6)        | 3.2 (5)         | -2.7 (5)        |
| O <sup>3</sup>  | 12.7 (6)        | 30.7 (9)        | 21.0 (7)        | -2.8 (6)        | 1.7 (5)         | 0.9 (6)         |
| N <sup>1</sup>  | 14.4 (7)        | 20.7 (9)        | 16.2 (7)        | -5.1 (7)        | 0.4 (6)         | 0.0 (6)         |
| C <sup>1</sup>  | 15.7 (8)        | 14.3 (10)       | 16.9 (9)        | 0.9 (7)         | 3.0 (7)         | 0.1 (7)         |
| C <sup>2</sup>  | 12.5 (8)        | 17.2 (10)       | 14.7 (9)        | -0.2 (7)        | 2.4 (7)         | 0.9 (7)         |
| C <sup>3</sup>  | 8.8 (8)         | 17.4 (10)       | 18.8 (9)        | -0.4 (7)        | 1.9 (6)         | 0.6 (7)         |
| C <sup>4</sup>  | 15.2 (9)        | 21.0 (11)       | 16.6 (9)        | -0.9 (8)        | 3.7 (7)         | 0.4 (7)         |
| C <sup>5</sup>  | 17.5 (9)        | 19.2 (10)       | 23.8 (10)       | 4.9 (8)         | 4.4 (7)         | -0.3 (8)        |
| C <sup>6</sup>  | 19.3 (9)        | 15.5 (10)       | 27.5 (11)       | -1.1 (8)        | 2.1 (8)         | -0.9 (8)        |
| C <sup>7</sup>  | 22.2 (9)        | 20.6 (11)       | 20.0 (9)        | -2.9 (8)        | 2.5 (7)         | 0.4 (8)         |
| C <sup>8</sup>  | 16.3 (9)        | 19.9 (10)       | 15.8 (9)        | 1.8 (7)         | 2.6 (7)         | -1.0 (7)        |
| C <sup>11</sup> | 15.1 (8)        | 19.0 (10)       | 16.6 (8)        | -5.1 (8)        | 4.1 (6)         | -1.9 (7)        |
| C <sup>12</sup> | 19.7 (9)        | 19.9 (11)       | 21.9 (10)       | 2.1 (8)         | 3.9 (7)         | 0.1 (8)         |
| C <sup>13</sup> | 18.7 (10)       | 27.4 (12)       | 26.1 (10)       | -1.3 (8)        | 1.9 (8)         | 3.2 (8)         |

|                 |           |           |           |           |          |          |
|-----------------|-----------|-----------|-----------|-----------|----------|----------|
| C <sup>14</sup> | 15.7 (9)  | 29.1 (12) | 28.6 (10) | -8.0 (9)  | 8.0 (7)  | -4.7 (8) |
| C <sup>15</sup> | 26.3 (11) | 22.4 (11) | 23.1 (10) | -1.8 (9)  | 9.7 (8)  | -6.0 (8) |
| C <sup>16</sup> | 22.9 (10) | 18.0 (11) | 15.6 (9)  | -1.1 (8)  | 3.1 (7)  | -0.8 (8) |
| C <sup>21</sup> | 16.4 (9)  | 13.8 (9)  | 17.1 (8)  | 2.3 (7)   | 2.0 (7)  | 1.1 (7)  |
| C <sup>22</sup> | 18.5 (9)  | 17.8 (10) | 15.7 (9)  | -1.2 (7)  | -0.4 (7) | 0.2 (7)  |
| C <sup>23</sup> | 20.5 (9)  | 21.8 (11) | 15.6 (9)  | -0.8 (8)  | 4.3 (7)  | 2.8 (8)  |
| C <sup>24</sup> | 13.4 (8)  | 19.5 (10) | 19.1 (9)  | 3.4 (8)   | 2.1 (7)  | 1.4 (7)  |
| C <sup>25</sup> | 15.6 (9)  | 21.0 (10) | 18.5 (9)  | -1.8 (8)  | -1.4 (7) | 0.6 (7)  |
| C <sup>26</sup> | 17.0 (9)  | 19.8 (10) | 16.5 (9)  | -1.8 (8)  | 3.1 (7)  | 1.7 (7)  |
| C <sup>27</sup> | 13.8 (9)  | 37.8 (13) | 33.3 (11) | -8.6 (10) | -0.1 (8) | 0.0 (9)  |

**Table S8. Bond Lengths for 3f.**

| Atom           | Atom            | Length/Å  | Atom            | Atom            | Length/Å  |
|----------------|-----------------|-----------|-----------------|-----------------|-----------|
| O <sup>1</sup> | C <sup>1</sup>  | 1.193 (2) | C <sup>7</sup>  | C <sup>8</sup>  | 1.387 (3) |
| O <sup>2</sup> | C <sup>1</sup>  | 1.353 (2) | C <sup>11</sup> | C <sup>12</sup> | 1.378 (3) |
| O <sup>2</sup> | C <sup>11</sup> | 1.413 (2) | C <sup>11</sup> | C <sup>16</sup> | 1.378 (3) |
| O <sup>3</sup> | C <sup>24</sup> | 1.378 (2) | C <sup>12</sup> | C <sup>13</sup> | 1.392 (3) |
| O <sup>3</sup> | C <sup>27</sup> | 1.422 (2) | C <sup>13</sup> | C <sup>14</sup> | 1.388 (3) |
| N <sup>1</sup> | C <sup>2</sup>  | 1.434 (2) | C <sup>14</sup> | C <sup>15</sup> | 1.387 (3) |
| N <sup>1</sup> | C <sup>21</sup> | 1.395 (2) | C <sup>15</sup> | C <sup>16</sup> | 1.388 (3) |
| C <sup>1</sup> | C <sup>2</sup>  | 1.525 (2) | C <sup>21</sup> | C <sup>22</sup> | 1.409 (3) |
| C <sup>2</sup> | C <sup>3</sup>  | 1.533 (3) | C <sup>21</sup> | C <sup>26</sup> | 1.390 (3) |
| C <sup>3</sup> | C <sup>4</sup>  | 1.391 (3) | C <sup>22</sup> | C <sup>23</sup> | 1.378 (3) |
| C <sup>3</sup> | C <sup>8</sup>  | 1.395 (3) | C <sup>23</sup> | C <sup>24</sup> | 1.396 (3) |
| C <sup>4</sup> | C <sup>5</sup>  | 1.394 (3) | C <sup>24</sup> | C <sup>25</sup> | 1.385 (3) |
| C <sup>5</sup> | C <sup>6</sup>  | 1.386 (3) | C <sup>25</sup> | C <sup>26</sup> | 1.400 (3) |
| C <sup>6</sup> | C <sup>7</sup>  | 1.389 (3) |                 |                 |           |

**Table S9. Bond Angles for 3f.**

| Atom            | Atom           | Atom            | Angle/°     | Atom            | Atom            | Atom            | Angle/°     |
|-----------------|----------------|-----------------|-------------|-----------------|-----------------|-----------------|-------------|
| C <sup>1</sup>  | O <sup>2</sup> | C <sup>11</sup> | 119.20 (14) | C <sup>12</sup> | C <sup>11</sup> | C <sup>16</sup> | 122.13 (17) |
| C <sup>24</sup> | O <sup>3</sup> | C <sup>27</sup> | 116.79 (15) | C <sup>16</sup> | C <sup>11</sup> | O <sup>2</sup>  | 115.77 (16) |
| C <sup>21</sup> | N <sup>1</sup> | C <sup>2</sup>  | 121.38 (15) | C <sup>11</sup> | C <sup>12</sup> | C <sup>13</sup> | 118.39 (19) |
| O <sup>1</sup>  | C <sup>1</sup> | O <sup>2</sup>  | 124.68 (17) | C <sup>14</sup> | C <sup>13</sup> | C <sup>12</sup> | 120.43 (19) |
| O <sup>1</sup>  | C <sup>1</sup> | C <sup>2</sup>  | 125.71 (17) | C <sup>15</sup> | C <sup>14</sup> | C <sup>13</sup> | 119.99 (18) |
| O <sup>2</sup>  | C <sup>1</sup> | C <sup>2</sup>  | 109.61 (15) | C <sup>14</sup> | C <sup>15</sup> | C <sup>16</sup> | 119.97 (19) |
| N <sup>1</sup>  | C <sup>2</sup> | C <sup>1</sup>  | 107.64 (15) | C <sup>11</sup> | C <sup>16</sup> | C <sup>15</sup> | 119.07 (18) |
| N <sup>1</sup>  | C <sup>2</sup> | C <sup>3</sup>  | 116.47 (15) | N <sup>1</sup>  | C <sup>21</sup> | C <sup>22</sup> | 118.93 (16) |

|                 |                 |                |             |                 |                 |                 |             |
|-----------------|-----------------|----------------|-------------|-----------------|-----------------|-----------------|-------------|
| C <sup>1</sup>  | C <sup>2</sup>  | C <sup>3</sup> | 109.63 (15) | C <sup>26</sup> | C <sup>21</sup> | N <sup>1</sup>  | 122.75 (16) |
| C <sup>4</sup>  | C <sup>3</sup>  | C <sup>2</sup> | 120.91 (17) | C <sup>26</sup> | C <sup>21</sup> | C <sup>22</sup> | 118.30 (16) |
| C <sup>4</sup>  | C <sup>3</sup>  | C <sup>8</sup> | 119.49 (18) | C <sup>23</sup> | C <sup>22</sup> | C <sup>21</sup> | 120.84 (17) |
| C <sup>8</sup>  | C <sup>3</sup>  | C <sup>2</sup> | 119.58 (17) | C <sup>22</sup> | C <sup>23</sup> | C <sup>24</sup> | 120.37 (17) |
| C <sup>3</sup>  | C <sup>4</sup>  | C <sup>5</sup> | 120.17 (18) | O <sup>3</sup>  | C <sup>24</sup> | C <sup>23</sup> | 115.93 (17) |
| C <sup>6</sup>  | C <sup>5</sup>  | C <sup>4</sup> | 119.96 (19) | O <sup>3</sup>  | C <sup>24</sup> | C <sup>25</sup> | 124.49 (17) |
| C <sup>5</sup>  | C <sup>6</sup>  | C <sup>7</sup> | 120.07 (19) | C <sup>25</sup> | C <sup>24</sup> | C <sup>23</sup> | 119.58 (17) |
| C <sup>8</sup>  | C <sup>7</sup>  | C <sup>6</sup> | 120.10 (19) | C <sup>24</sup> | C <sup>25</sup> | C <sup>26</sup> | 120.01 (18) |
| C <sup>7</sup>  | C <sup>8</sup>  | C <sup>3</sup> | 120.21 (19) | C <sup>21</sup> | C <sup>26</sup> | C <sup>25</sup> | 120.90 (17) |
| C <sup>12</sup> | C <sup>11</sup> | O <sup>2</sup> | 121.92 (17) |                 |                 |                 |             |

**Table S10. Torsion Angles for 3f.**

| A              | B               | C               | D               | Angle/°      | A               | B               | C               | D               | Angle/°      |
|----------------|-----------------|-----------------|-----------------|--------------|-----------------|-----------------|-----------------|-----------------|--------------|
| O <sup>1</sup> | C <sup>1</sup>  | C <sup>2</sup>  | N <sup>1</sup>  | -19.7 (3)    | C <sup>5</sup>  | C <sup>6</sup>  | C <sup>7</sup>  | C <sup>8</sup>  | 0.5 (3)      |
| O <sup>1</sup> | C <sup>1</sup>  | C <sup>2</sup>  | C <sup>3</sup>  | 107.9 (2)    | C <sup>6</sup>  | C <sup>7</sup>  | C <sup>8</sup>  | C <sup>3</sup>  | -0.6 (3)     |
| O <sup>2</sup> | C <sup>1</sup>  | C <sup>2</sup>  | N <sup>1</sup>  | 160.11 (15)  | C <sup>8</sup>  | C <sup>3</sup>  | C <sup>4</sup>  | C <sup>5</sup>  | 0.3 (3)      |
| O <sup>2</sup> | C <sup>1</sup>  | C <sup>2</sup>  | C <sup>3</sup>  | -72.31 (19)  | C <sup>11</sup> | O <sup>2</sup>  | C <sup>1</sup>  | O <sup>1</sup>  | -3.1 (3)     |
| O <sup>2</sup> | C <sup>11</sup> | C <sup>12</sup> | C <sup>13</sup> | -175.07 (18) | C <sup>11</sup> | O <sup>2</sup>  | C <sup>1</sup>  | C <sup>2</sup>  | 177.15 (16)  |
| O <sup>2</sup> | C <sup>11</sup> | C <sup>16</sup> | C <sup>15</sup> | 174.94 (17)  | C <sup>11</sup> | C <sup>12</sup> | C <sup>13</sup> | C <sup>14</sup> | 0.5 (3)      |
| O <sup>3</sup> | C <sup>24</sup> | C <sup>25</sup> | C <sup>26</sup> | -179.66 (19) | C <sup>12</sup> | C <sup>11</sup> | C <sup>16</sup> | C <sup>15</sup> | -0.3 (3)     |
| N <sup>1</sup> | C <sup>2</sup>  | C <sup>3</sup>  | C <sup>4</sup>  | 22.4 (2)     | C <sup>12</sup> | C <sup>13</sup> | C <sup>14</sup> | C <sup>15</sup> | -0.4 (3)     |
| N <sup>1</sup> | C <sup>2</sup>  | C <sup>3</sup>  | C <sup>8</sup>  | -155.78 (16) | C <sup>13</sup> | C <sup>14</sup> | C <sup>15</sup> | C <sup>16</sup> | 0.0 (3)      |
| N <sup>1</sup> | C <sup>21</sup> | C <sup>22</sup> | C <sup>23</sup> | -178.84 (18) | C <sup>14</sup> | C <sup>15</sup> | C <sup>16</sup> | C <sup>11</sup> | 0.4 (3)      |
| N <sup>1</sup> | C <sup>21</sup> | C <sup>26</sup> | C <sup>25</sup> | 178.66 (19)  | C <sup>16</sup> | C <sup>11</sup> | C <sup>12</sup> | C <sup>13</sup> | -0.1 (3)     |
| C <sup>1</sup> | O <sup>2</sup>  | C <sup>11</sup> | C <sup>12</sup> | -57.3 (2)    | C <sup>21</sup> | N <sup>1</sup>  | C <sup>2</sup>  | C <sup>1</sup>  | -170.69 (17) |
| C <sup>1</sup> | O <sup>2</sup>  | C <sup>11</sup> | C <sup>16</sup> | 127.40 (18)  | C <sup>21</sup> | N <sup>1</sup>  | C <sup>2</sup>  | C <sup>3</sup>  | 65.8 (2)     |
| C <sup>1</sup> | C <sup>2</sup>  | C <sup>3</sup>  | C <sup>4</sup>  | -100.03 (19) | C <sup>21</sup> | C <sup>22</sup> | C <sup>23</sup> | C <sup>24</sup> | 0.1 (3)      |
| C <sup>1</sup> | C <sup>2</sup>  | C <sup>3</sup>  | C <sup>8</sup>  | 81.7 (2)     | C <sup>22</sup> | C <sup>21</sup> | C <sup>26</sup> | C <sup>25</sup> | 0.6 (3)      |
| C <sup>2</sup> | N <sup>1</sup>  | C <sup>21</sup> | C <sup>22</sup> | -179.56 (17) | C <sup>22</sup> | C <sup>23</sup> | C <sup>24</sup> | O <sup>3</sup>  | 179.64 (18)  |
| C <sup>2</sup> | N <sup>1</sup>  | C <sup>21</sup> | C <sup>26</sup> | 2.4 (3)      | C <sup>22</sup> | C <sup>23</sup> | C <sup>24</sup> | C <sup>25</sup> | 0.6 (3)      |
| C <sup>2</sup> | C <sup>3</sup>  | C <sup>4</sup>  | C <sup>5</sup>  | -177.94 (17) | C <sup>23</sup> | C <sup>24</sup> | C <sup>25</sup> | C <sup>26</sup> | -0.7 (3)     |
| C <sup>2</sup> | C <sup>3</sup>  | C <sup>8</sup>  | C <sup>7</sup>  | 178.44 (18)  | C <sup>24</sup> | C <sup>25</sup> | C <sup>26</sup> | C <sup>21</sup> | 0.1 (3)      |
| C <sup>3</sup> | C <sup>4</sup>  | C <sup>5</sup>  | C <sup>6</sup>  | -0.4 (3)     | C <sup>26</sup> | C <sup>21</sup> | C <sup>22</sup> | C <sup>23</sup> | -0.7 (3)     |
| C <sup>4</sup> | C <sup>3</sup>  | C <sup>8</sup>  | C <sup>7</sup>  | 0.2 (3)      | C <sup>27</sup> | O <sup>3</sup>  | C <sup>24</sup> | C <sup>23</sup> | 177.84 (19)  |
| C <sup>4</sup> | C <sup>5</sup>  | C <sup>6</sup>  | C <sup>7</sup>  | -0.1 (3)     | C <sup>27</sup> | O <sup>3</sup>  | C <sup>24</sup> | C <sup>25</sup> | -3.1 (3)     |

**Table S11. Hydrogen Atom Coordinates ( $\text{\AA}\times 10^4$ ) and Isotropic Displacement Parameters ( $\text{\AA}^2\times 10^3$ ) for 3f.**

| <b>Atom</b>      | <b>x</b> | <b>y</b> | <b>z</b> | <b>U(eq)</b> |
|------------------|----------|----------|----------|--------------|
| H <sup>1</sup>   | 5688     | 2057     | 807      | 21           |
| H <sup>2</sup>   | 5820     | 2733     | 3210     | 18           |
| H <sup>4</sup>   | 5876     | 5696     | 794      | 21           |
| H <sup>5</sup>   | 6030     | 8575     | 1067     | 24           |
| H <sup>6</sup>   | 5946     | 9776     | 3017     | 25           |
| H <sup>7</sup>   | 5704     | 8109     | 4696     | 25           |
| H <sup>8</sup>   | 5565     | 5235     | 4435     | 21           |
| H <sup>12</sup>  | 3592     | 4340     | 2116     | 24           |
| H <sup>13</sup>  | 2477     | 3915     | 2422     | 29           |
| H <sup>14</sup>  | 2182     | 2074     | 3954     | 29           |
| H <sup>15</sup>  | 2994     | 624      | 5174     | 28           |
| H <sup>16</sup>  | 4106     | 1020     | 4856     | 23           |
| H <sup>22</sup>  | 6615     | 1290     | -302     | 21           |
| H <sup>23</sup>  | 7746     | 1171     | -400     | 23           |
| H <sup>25</sup>  | 8023     | 3489     | 2936     | 22           |
| H <sup>26</sup>  | 6881     | 3619     | 3036     | 21           |
| H <sup>27A</sup> | 9561     | 2756     | 1858     | 43           |
| H <sup>27B</sup> | 9055     | 2372     | 2851     | 43           |
| H <sup>27C</sup> | 9021     | 4092     | 2131     | 43           |



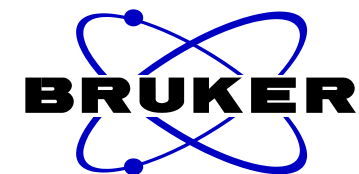

NAME HNMR-gwg-8-95-1  
EXPNO 1  
PROCNO 1  
Date\_ 20200815  
Time\_ 16.02  
INSTRUM spect  
PROBHD 5 mm PABBO BB/  
PULPROG zg30  
TD 65536  
SOLVENT CDCl3  
NS 4  
DS 0  
SWH 8012.820 Hz  
FIDRES 0.122266 Hz  
AQ 4.0894966 sec  
RG 103.52  
DW 62.400 usec  
DE 6.50 usec  
TE 296.5 K  
D1 1.00000000 sec  
TD0 1

===== CHANNEL f1 =====  
SFO1 400.1324710 MHz  
NUC1 1H  
P1 14.50 usec  
SI 65536  
SF 400.1300000 MHz  
WDW EM  
SSB 0  
LB 0.30 Hz  
GB 0  
PC 1.00

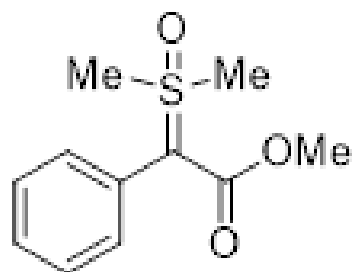

1a

7.37  
7.35  
7.34  
7.30  
7.29

3.63  
3.43

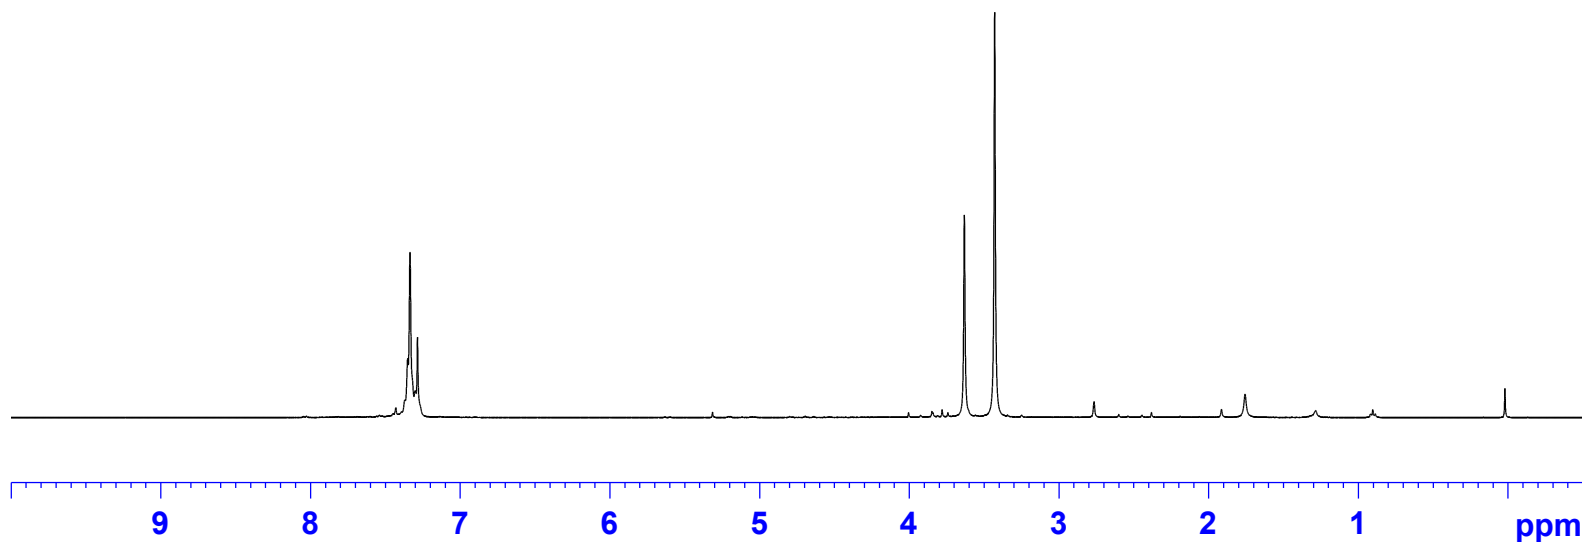

5.29

3.00  
6.04

S-65

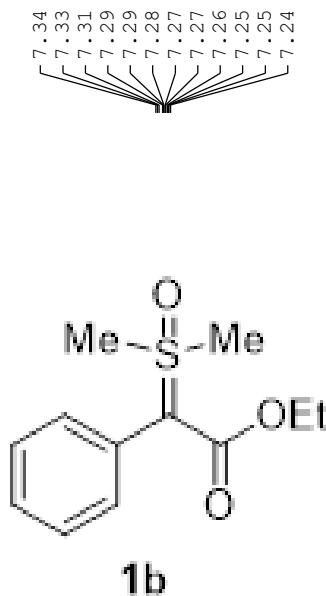

7.34  
7.33  
7.31  
7.29  
7.28  
7.27  
7.26  
7.25  
7.24

4.15  
4.13  
4.11  
4.10

3.42

1.22  
1.21  
1.19

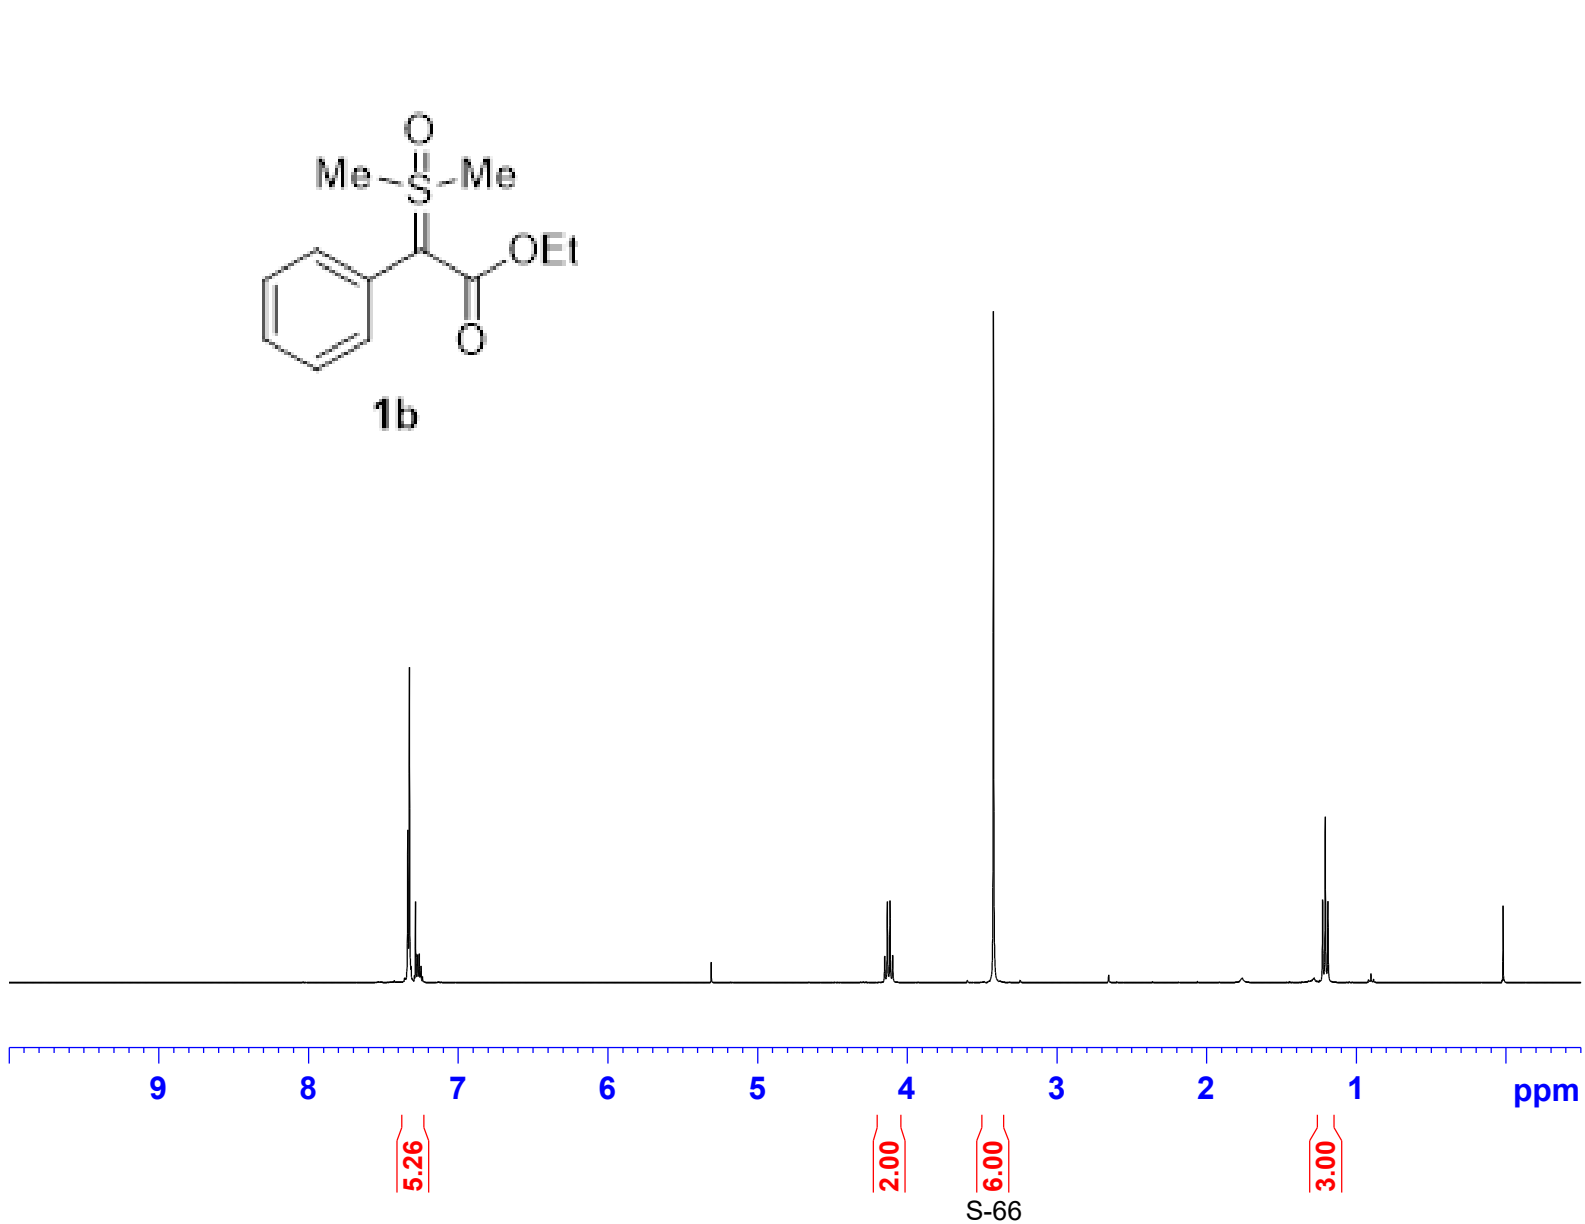

NAME HNMR-gwg-8-91-1  
EXPNO 1  
PROCNO 1  
Date\_ 20200814  
Time\_ 15.36  
INSTRUM spect  
PROBHD 5 mm PABBO BB/  
PULPROG zg30  
TD 65536  
SOLVENT CDCl3  
NS 2  
DS 0  
SWH 8012.820 Hz  
FIDRES 0.122266 Hz  
AQ 4.0894966 sec  
RG 82.92  
DW 62.400 usec  
DE 6.50 usec  
TE 296.9 K  
D1 1.00000000 sec  
TD0 1

==== CHANNEL f1 =====  
SFO1 400.1324710 MHz  
NUC1 1H  
P1 14.50 usec  
SI 65536  
SF 400.1300000 MHz  
WDW EM  
SSB 0  
LB 0.30 Hz  
GB 0  
PC 1.00

S-66

7.31  
7.30  
7.29  
7.28  
7.28  
7.26  
7.25  
7.24  
7.23  
7.22  
7.21

5.06  
5.05  
5.03  
5.02  
5.00  
4.99  
4.97

3.40

1.20  
1.18

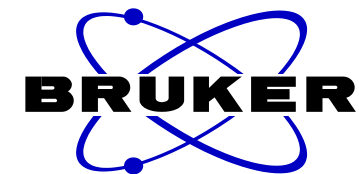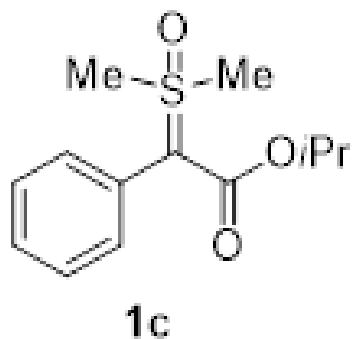

NAME HNMR-gwg-8-92-1  
EXPNO 1  
PROCNO 1  
Date\_ 20200814  
Time\_ 15.30  
INSTRUM spect  
PROBHD 5 mm PABBO BB/  
PULPROG zg30  
TD 65536  
SOLVENT CDCl3  
NS 3  
DS 0  
SWH 8012.820 Hz  
FIDRES 0.122266 Hz  
AQ 4.0894966 sec  
RG 34.77  
DW 62.400 usec  
DE 6.50 usec  
TE 296.8 K  
D1 1.00000000 sec  
TD0 1

==== CHANNEL f1 =====  
SFO1 400.1324710 MHz  
NUC1 1H  
P1 14.50 usec  
SI 65536  
SF 400.1300000 MHz  
WDW EM  
SSB 0  
LB 0.30 Hz  
GB 0  
PC 1.00

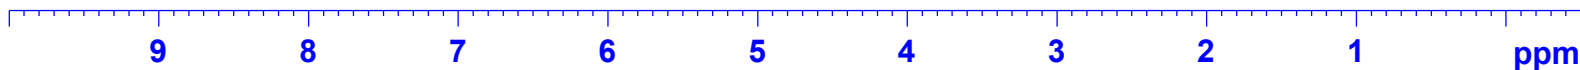

5.22

1.00

6.12

6.11

S-67

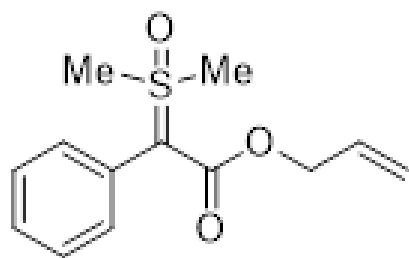

1d

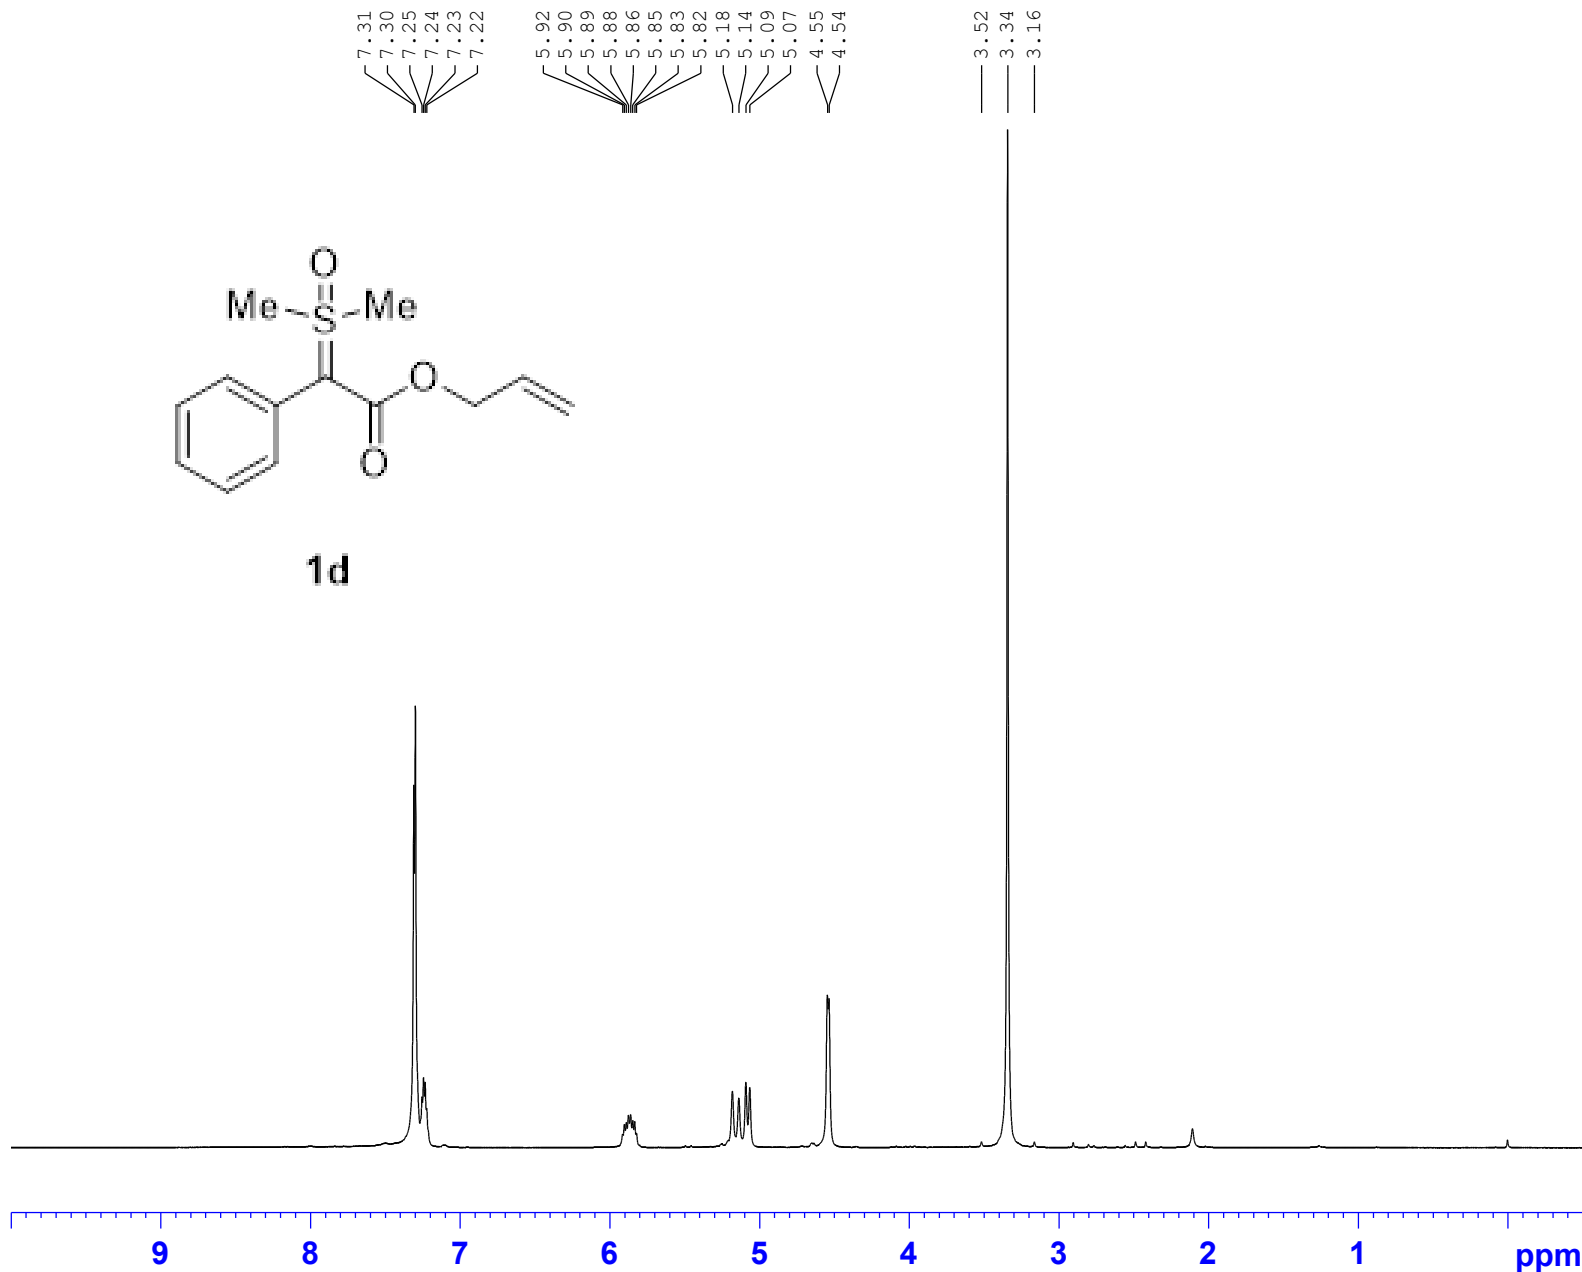

NAME HNMR-gwg-8-163-1  
EXPNO 1  
PROCNO 1  
Date\_ 20200908  
Time\_ 13.40  
INSTRUM spect  
PROBHD 5 mm PABBO BB/  
PULPROG zg30  
TD 65536  
SOLVENT CDCl3  
NS 4  
DS 0  
SWH 8012.820 Hz  
FIDRES 0.122266 Hz  
AQ 4.0894966 sec  
RG 19.7  
DW 62.400 usec  
DE 6.50 usec  
TE 296.8 K  
D1 1.00000000 sec  
TD0 1

==== CHANNEL f1 =====  
SFO1 400.1324710 MHz  
NUC1 1H  
P1 14.50 usec  
SI 65536  
SF 400.1300000 MHz  
WDW EM  
SSB 0  
LB 0.30 Hz  
GB 0  
PC 1.00

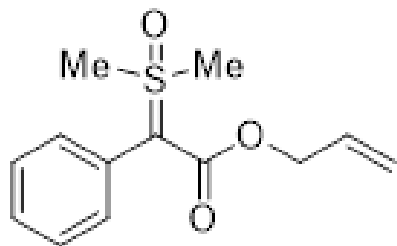

**1d**

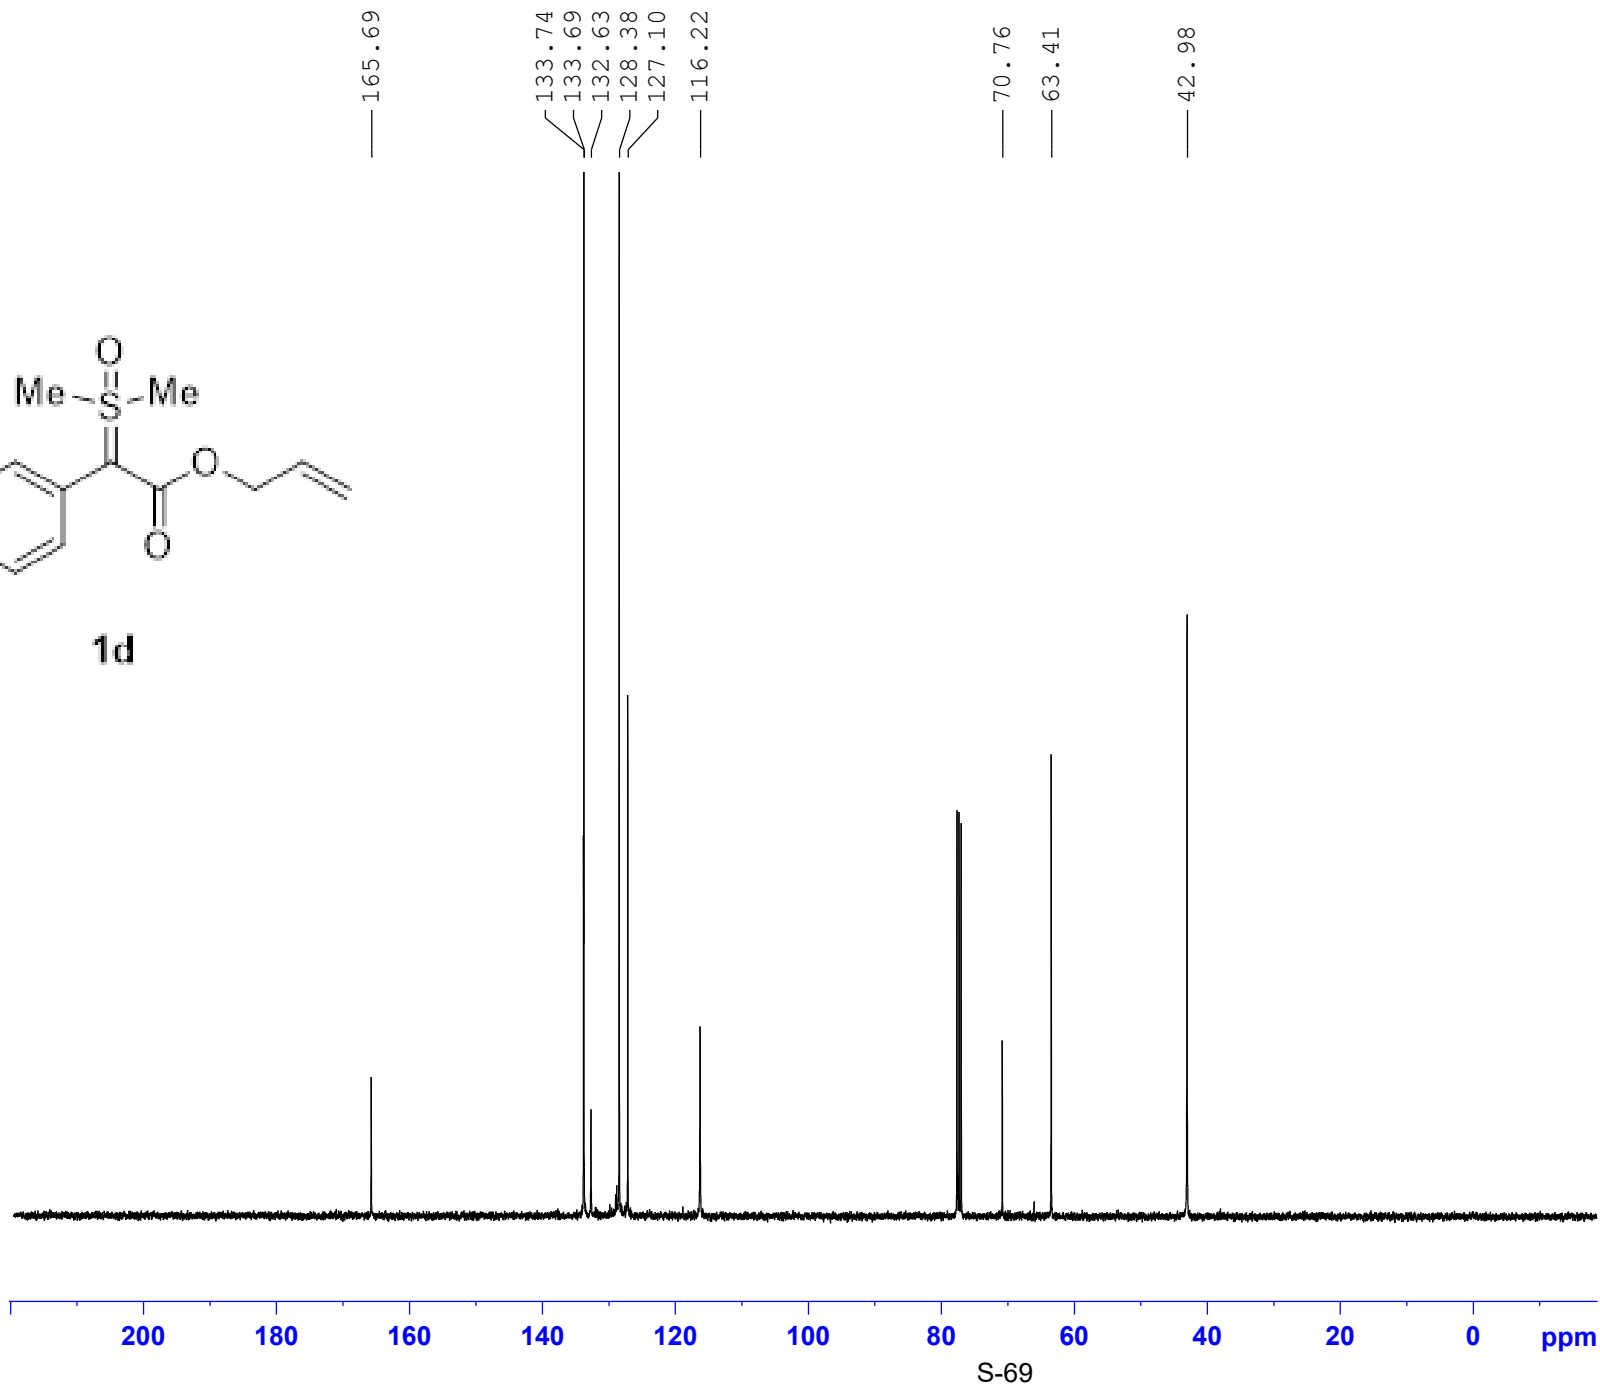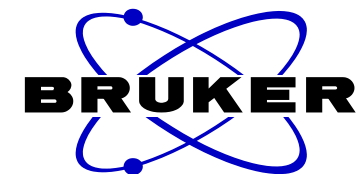

```

NAME      CNMR-gwg-8-163-1
EXPNO     1
PROCNO    1
Date_     20200908
Time_     13.52
INSTRUM   spect
PROBHD    5 mm PABBO BB/
PULPROG   zgpg30
TD        65536
SOLVENT   CDC13
NS        183
DS        0
SWH       24038.461 Hz
FIDRES    0.366798 Hz
AQ        1.3631988 sec
RG        196.92
DW        20.800 usec
DE        6.50 usec
TE        297.9 K
D1        2.00000000 sec
D11       0.03000000 sec
TD0       1
  
```

```

===== CHANNEL f1 =====
SF01      100.6228298 MHz
NUC1      13C
P1        9.70 usec
SI        32768
SF        100.6127690 MHz
WDW       EM
SSB       0
LB        1.00 Hz
GB        0
PC        1.40
  
```

7.38  
7.36  
7.36  
7.35  
7.35  
7.34  
7.34  
7.33  
7.33  
7.33  
7.32  
7.32  
7.31  
7.31  
7.30  
7.29  
7.28  
7.28  
7.27  
7.27  
7.26  
7.25  
7.24

5.15

3.41



NAME HNMR-gwg-8-106-1  
 EXPNO 1  
 PROCNO 1  
 Date\_ 20200819  
 Time\_ 19.34  
 INSTRUM spect  
 PROBHD 5 mm PABBO BB/  
 PULPROG zg30  
 TD 65536  
 SOLVENT CDCl3  
 NS 4  
 DS 0  
 SWH 8012.820 Hz  
 FIDRES 0.122266 Hz  
 AQ 4.0894966 sec  
 RG 82.92  
 DW 62.400 usec  
 DE 6.50 usec  
 TE 296.4 K  
 D1 1.00000000 sec  
 TD0 1

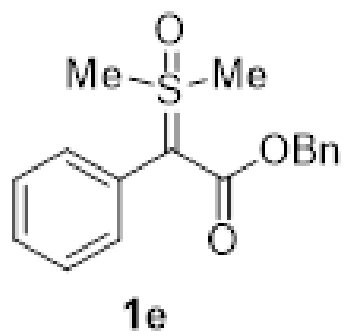

==== CHANNEL f1 =====  
 SFO1 400.1324710 MHz  
 NUC1 1H  
 P1 14.50 usec  
 SI 65536  
 SF 400.1300000 MHz  
 WDW EM  
 SSB 0  
 LB 0.30 Hz  
 GB 0  
 PC 1.00

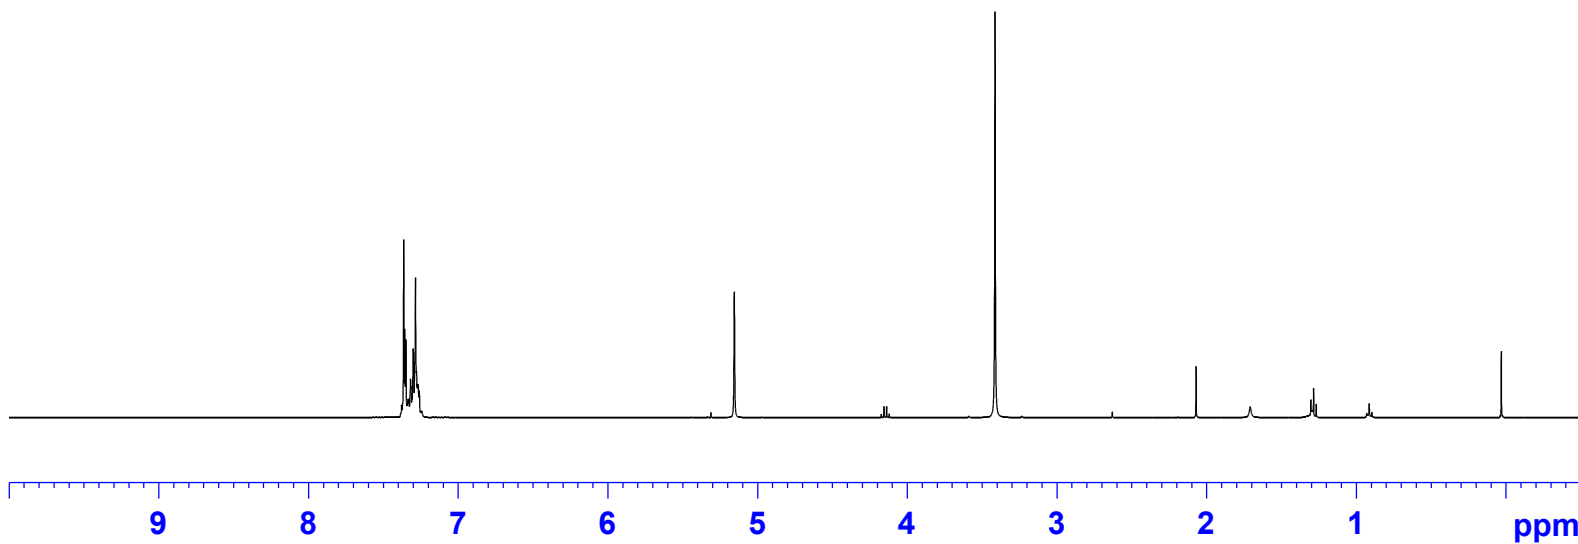

10.30

2.00

6.00  
S-70



NAME HNMR-gwg-8-135-1  
EXPNO 1  
PROCNO 1  
Date\_ 20200831  
Time\_ 21.28  
INSTRUM spect  
PROBHD 5 mm PABBO BB/  
PULPROG zg30  
TD 65536  
SOLVENT CDCl3  
NS 4  
DS 0  
SWH 8012.820 Hz  
FIDRES 0.122266 Hz  
AQ 4.0894966 sec  
RG 34.77  
DW 62.400 usec  
DE 6.50 usec  
TE 297.0 K  
D1 1.00000000 sec  
TD0 1

==== CHANNEL f1 =====  
SFO1 400.1324710 MHz  
NUC1 1H  
P1 14.50 usec  
SI 65536  
SF 400.1300000 MHz  
WDW EM  
SSB 0  
LB 0.30 Hz  
GB 0  
PC 1.00

7.48  
7.48  
7.47  
7.46  
7.46  
7.45  
7.45  
7.41  
7.41  
7.39  
7.39  
7.38  
7.38  
7.37  
7.37  
7.36  
7.36  
7.34  
7.34  
7.33  
7.33  
7.33  
7.32  
7.32  
7.31  
7.31  
7.30  
7.30  
7.28  
7.28  
7.18  
7.18  
7.16  
7.16  
7.14  
7.14  
7.12  
7.12  
7.11  
7.11  
7.10

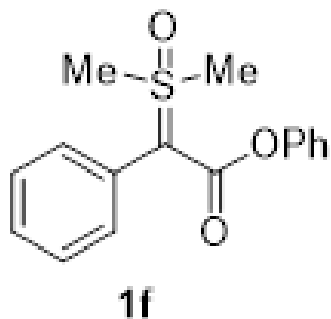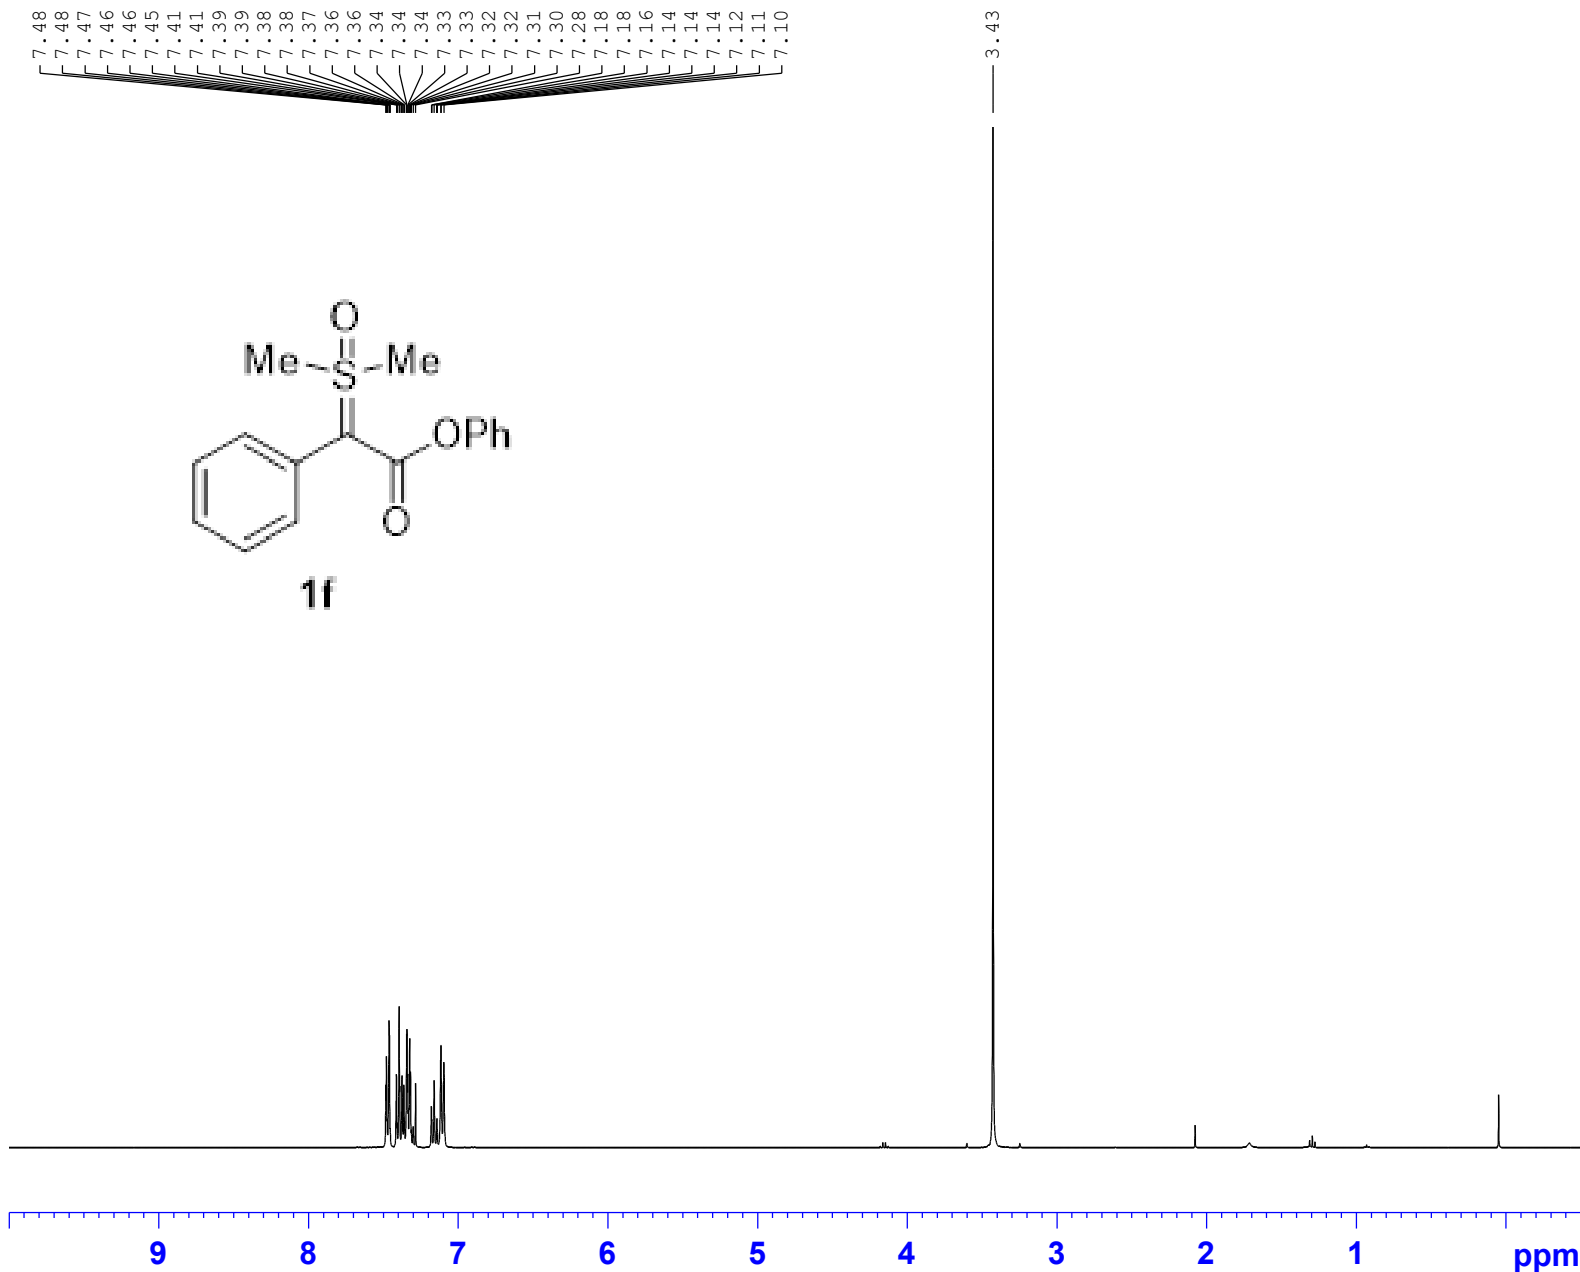

1.94  
4.96  
1.01  
1.93

6.00  
S-71



NAME HNMR-gwg-8-133-1  
EXPNO 1  
PROCNO 1  
Date\_ 20200830  
Time\_ 13.37  
INSTRUM spect  
PROBHD 5 mm PABBO BB/  
PULPROG zg30  
TD 65536  
SOLVENT CDCl3  
NS 4  
DS 0  
SWH 8012.820 Hz  
FIDRES 0.122266 Hz  
AQ 4.0894966 sec  
RG 25.32  
DW 62.400 usec  
DE 6.50 usec  
TE 296.8 K  
D1 1.00000000 sec  
TD0 1

==== CHANNEL f1 =====  
SFO1 400.1324710 MHz  
NUC1 1H  
P1 14.50 usec  
SI 65536  
SF 400.1300000 MHz  
WDW EM  
SSB 0  
LB 0.30 Hz  
GB 0  
PC 1.00

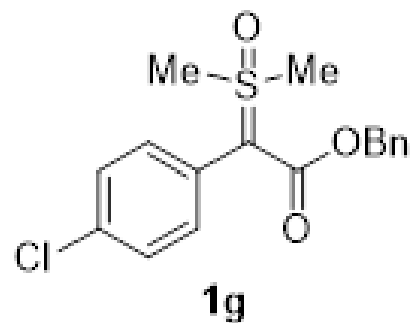

7.33  
7.31  
7.30  
7.29  
7.27

5.14

3.38

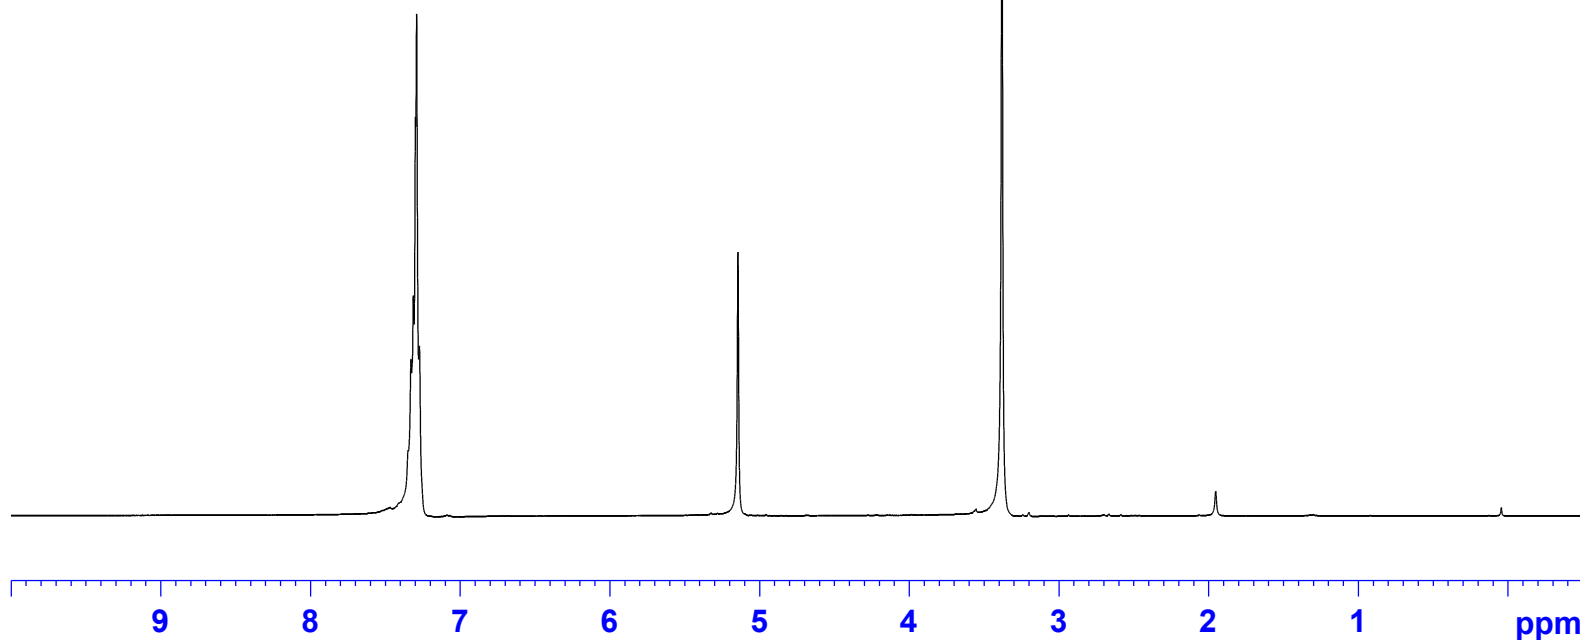

9.34

2.00

5.93

S-72





NAME CNMR-gwg-8-133-1  
EXPNO 1  
PROCNO 1  
Date\_ 20200830  
Time\_ 13.40  
INSTRUM spect  
PROBHD 5 mm PABBO BB/  
PULPROG zgpg30  
TD 65536  
SOLVENT CDCl3  
NS 28  
DS 0  
SWH 24038.461 Hz  
FIDRES 0.366798 Hz  
AQ 1.3631988 sec  
RG 196.92  
DW 20.800 usec  
DE 6.50 usec  
TE 297.5 K  
D1 2.00000000 sec  
D11 0.03000000 sec  
TD0 1

==== CHANNEL f1 =====  
SFO1 100.6228298 MHz  
NUC1 13C  
P1 9.70 usec  
SI 32768  
SF 100.6127690 MHz  
WDW EM  
SSB 0  
LB 1.00 Hz  
GB 0  
PC 1.40

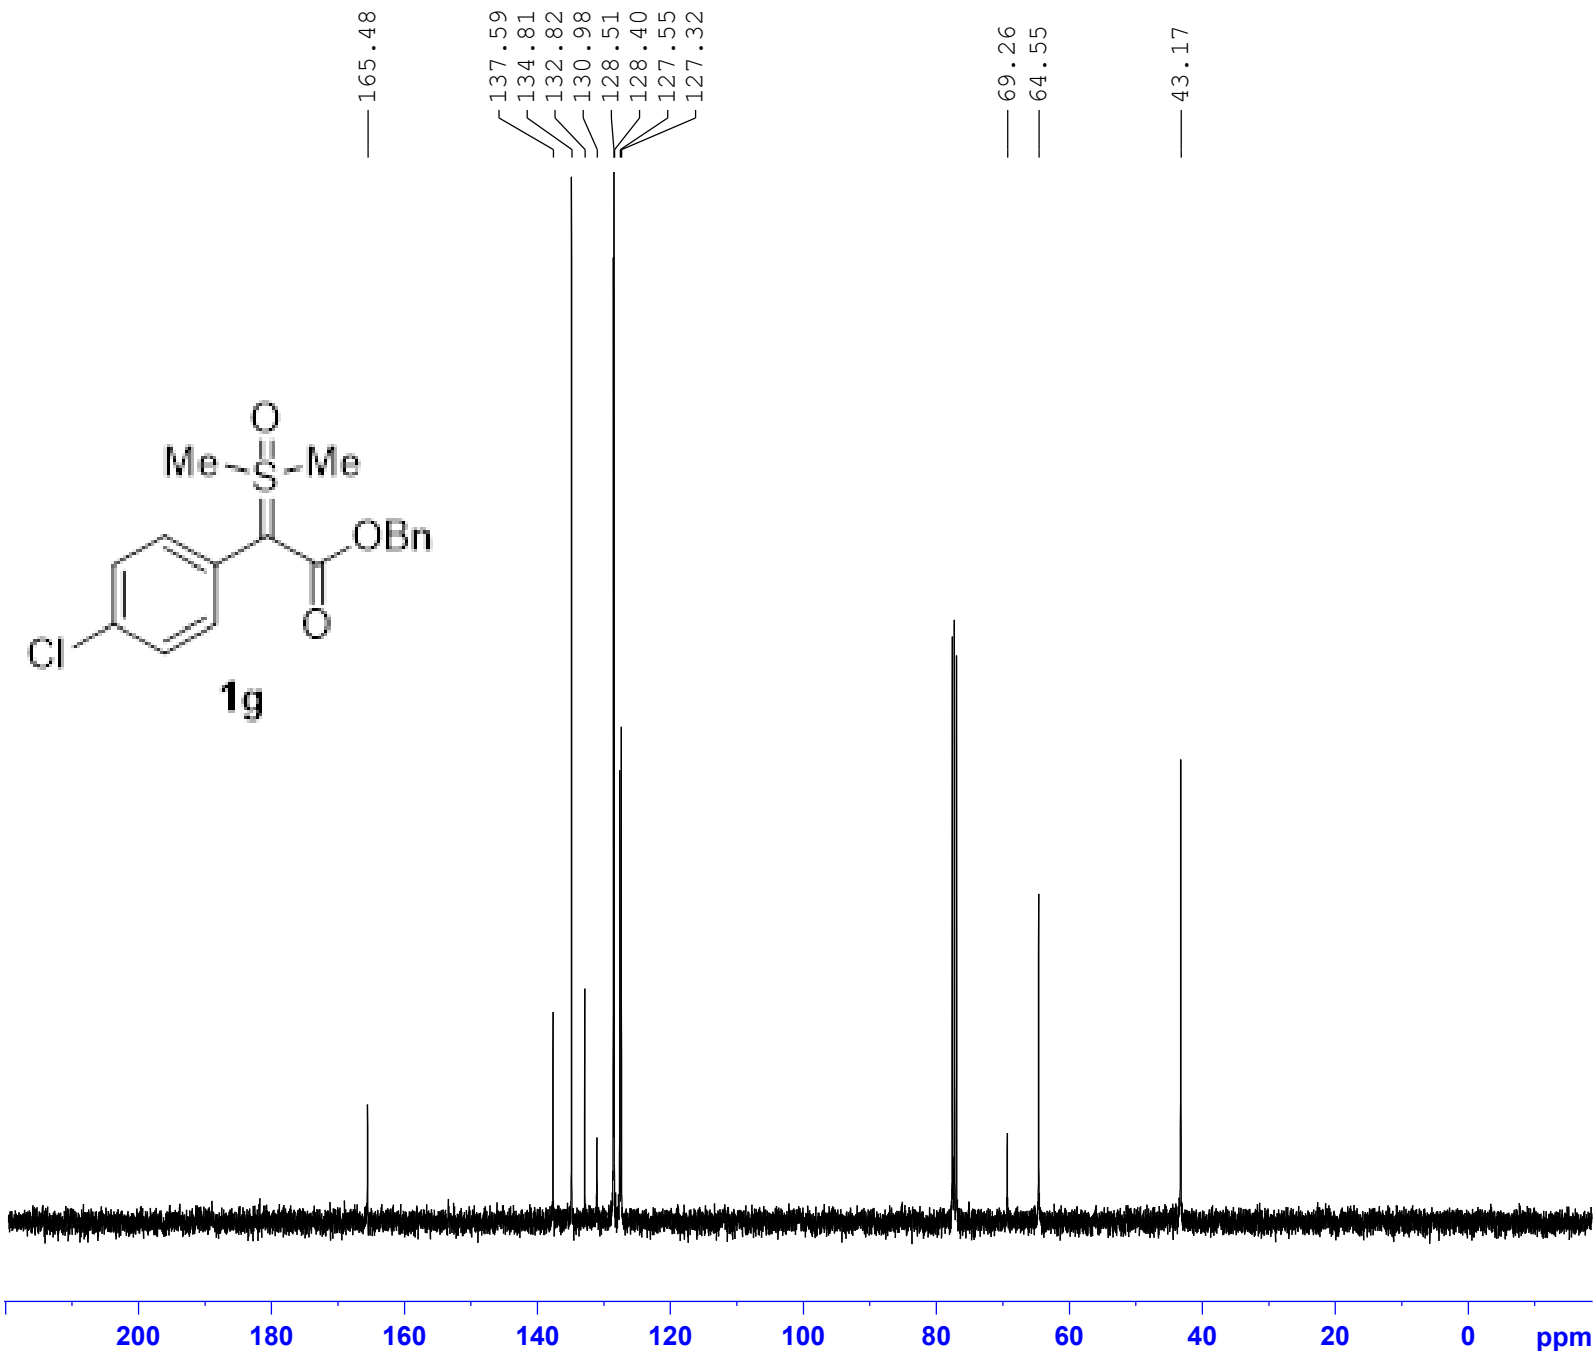



NAME HNMR-gwg-8-136-1  
EXPNO 1  
PROCNO 1  
Date\_ 20200831  
Time\_ 19.21  
INSTRUM spect  
PROBHD 5 mm PABBO BB/  
PULPROG zg30  
TD 65536  
SOLVENT CDCl3  
NS 4  
DS 0  
SWH 8012.820 Hz  
FIDRES 0.122266 Hz  
AQ 4.0894966 sec  
RG 45.67  
DW 62.400 usec  
DE 6.50 usec  
TE 296.7 K  
D1 1.00000000 sec  
TD0 1

==== CHANNEL f1 =====  
SFO1 400.1324710 MHz  
NUC1 1H  
P1 14.50 usec  
SI 65536  
SF 400.1300000 MHz  
WDW EM  
SSB 0  
LB 0.30 Hz  
GB 0  
PC 1.00

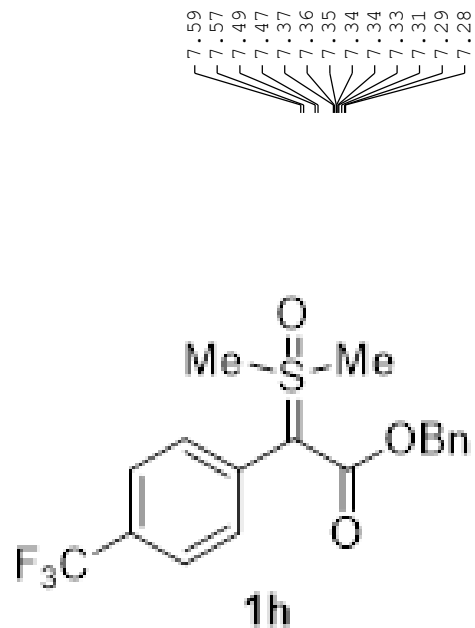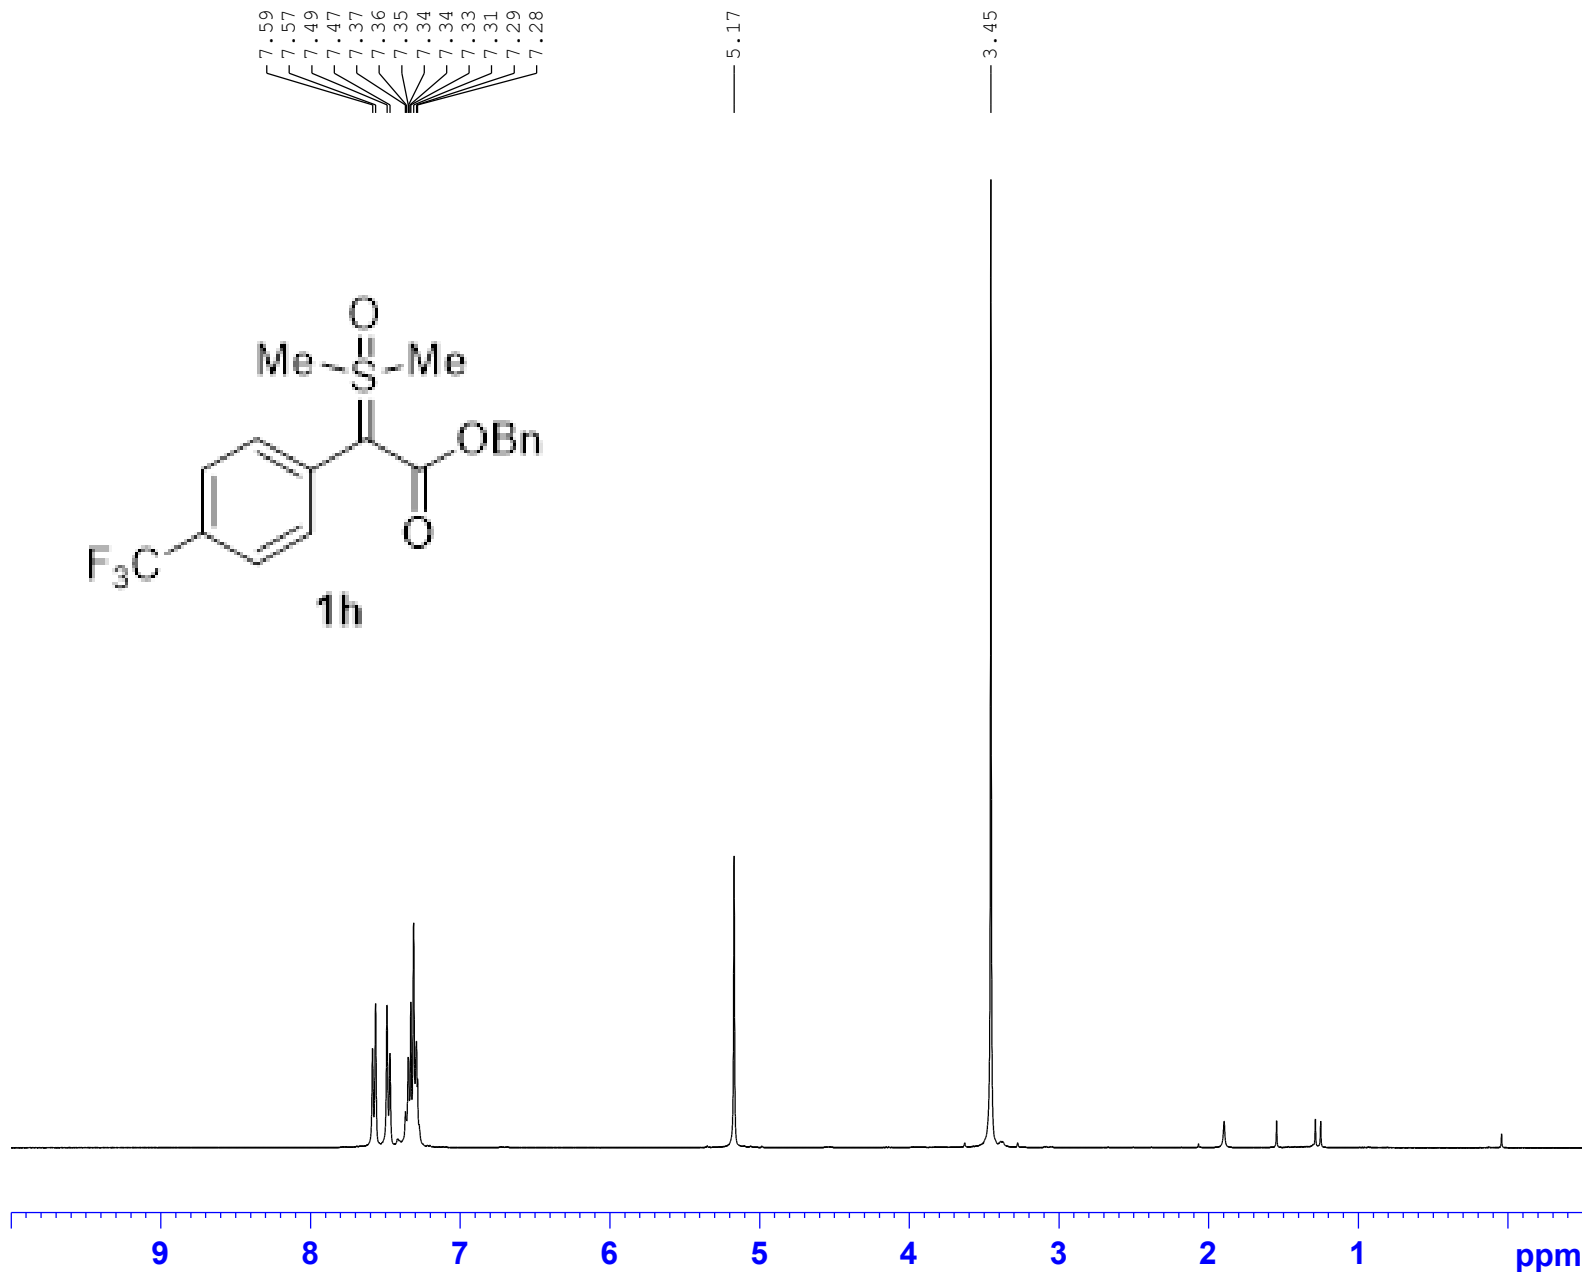

1.99  
2.10  
5.40

2.00

6.05

S-74

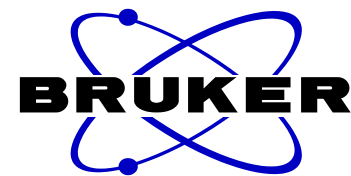

NAME CNMR-gwg-8-136-1  
EXPNO 1  
PROCNO 1  
Date\_ 20200831  
Time\_ 19.27  
INSTRUM spect  
PROBHD 5 mm PABBO BB/  
PULPROG zgpg30  
TD 65536  
SOLVENT CDCl3  
NS 53  
DS 0  
SWH 24038.461 Hz  
FIDRES 0.366798 Hz  
AQ 1.3631988 sec  
RG 196.92  
DW 20.800 usec  
DE 6.50 usec  
TE 297.3 K  
D1 2.00000000 sec  
D11 0.03000000 sec  
TD0 1

==== CHANNEL f1 =====  
SF01 100.6228298 MHz  
NUC1 13C  
P1 9.70 usec  
SI 32768  
SF 100.6127690 MHz  
WDW EM  
SSB 0  
LB 1.00 Hz  
GB 0  
PC 1.40

— 165.24  
— 137.39  
— 136.44  
— 132.96  
— 128.62  
— 128.43  
— 128.30  
— 127.97  
— 127.65  
— 127.43  
— 125.73  
— 125.03  
— 124.99  
— 124.96  
— 124.92  
— 123.03

— 69.28  
— 64.72

— 43.53

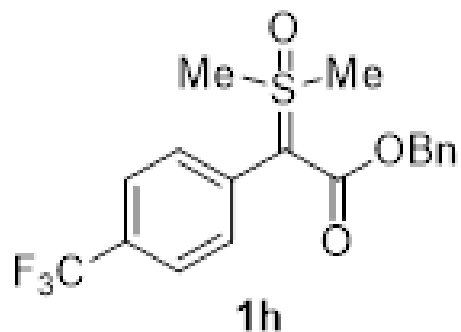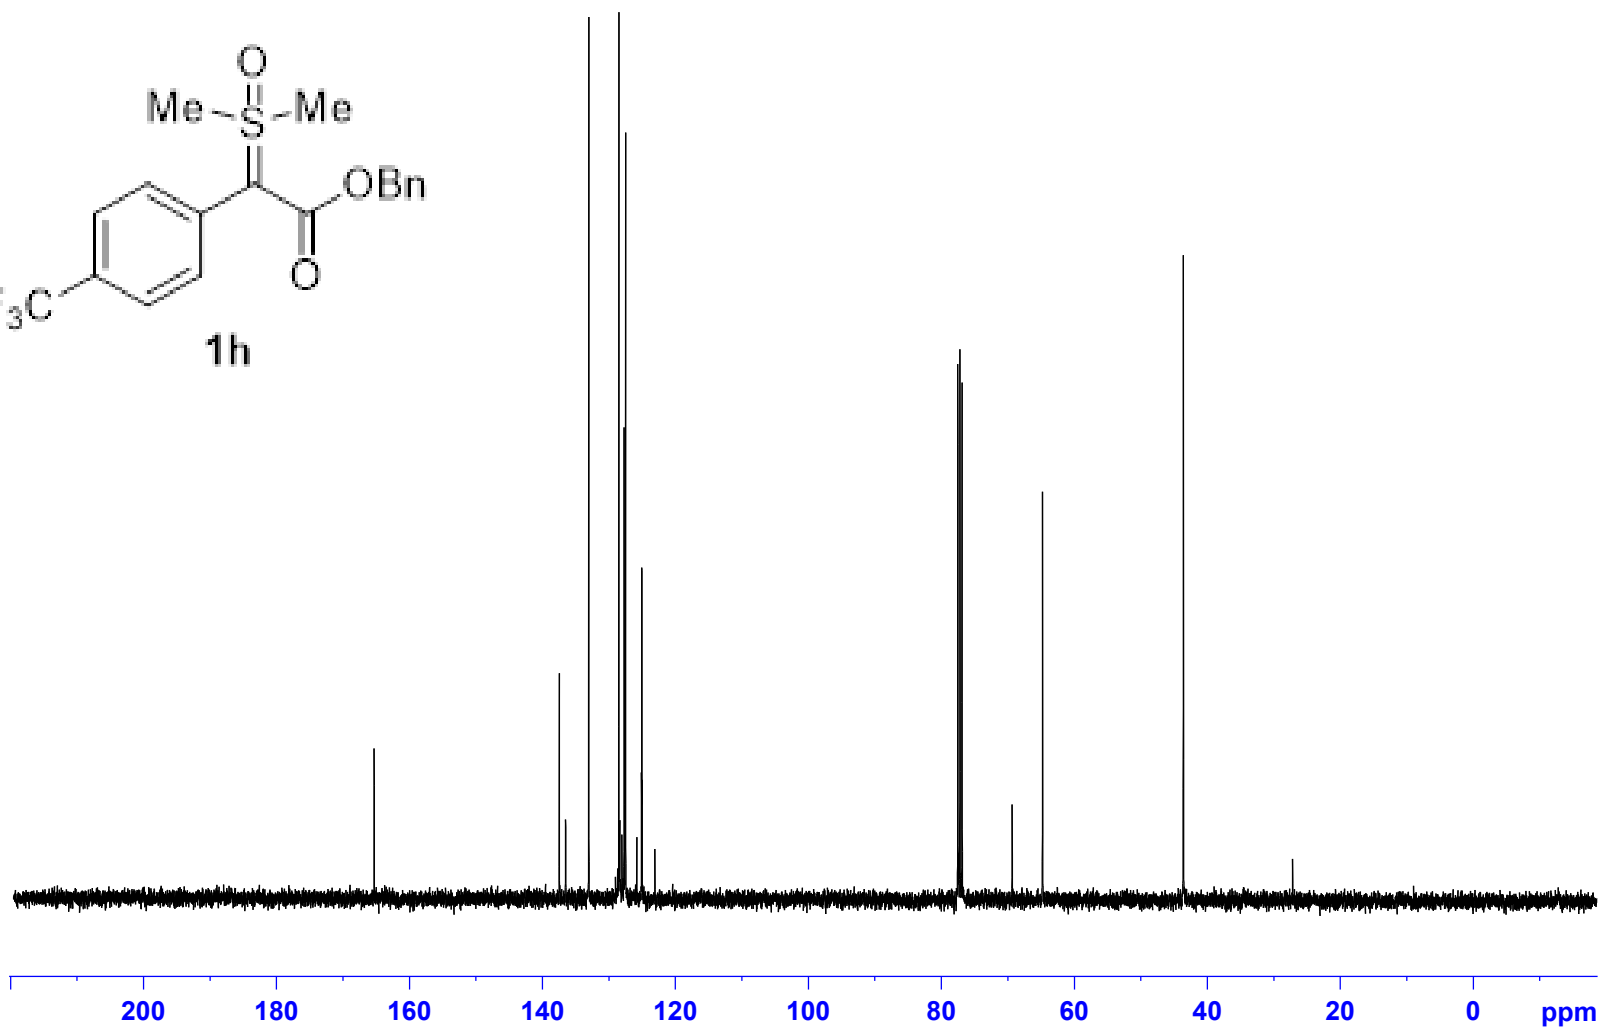

S-75

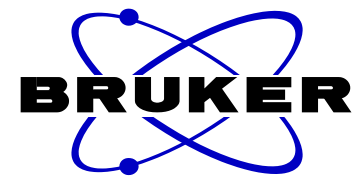

NAME FNMR-gwg-8-136-1  
EXPNO 1  
PROCNO 1  
Date\_ 20200831  
Time\_ 19.24  
INSTRUM spect  
PROBHD 5 mm PABBO BB/  
PULPROG zgpg30  
TD 65536  
SOLVENT CDCl3  
NS 4  
DS 0  
SWH 93750.000 Hz  
FIDRES 1.430511 Hz  
AQ 0.3495753 sec  
RG 196.92  
DW 5.333 usec  
DE 6.50 usec  
TE 296.7 K  
D1 2.0000000 sec  
D11 0.0300000 sec  
TD0 1

==== CHANNEL f1 =====  
SFO1 376.4607162 MHz  
NUC1 19F  
P1 14.70 usec  
SI 32768  
SF 376.4983660 MHz  
WDW EM  
SSB 0  
LB 1.00 Hz  
GB 0  
PC 1.40

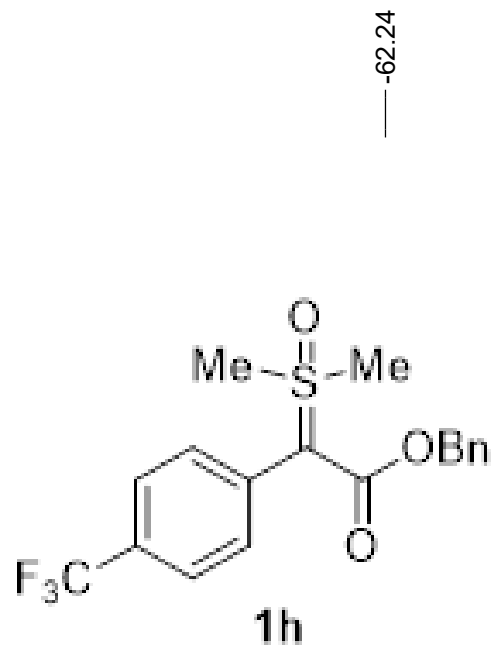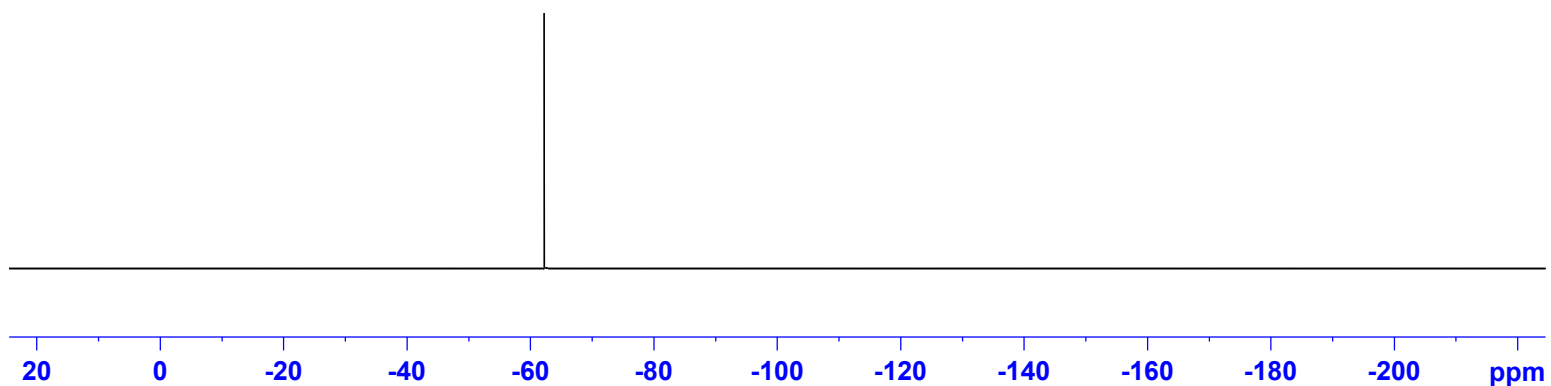



NAME HNMR-gwg-8-166-1  
EXPNO 1  
PROCNO 1  
Date\_ 20200909  
Time\_ 21.51  
INSTRUM spect  
PROBHD 5 mm PABBO BB/  
PULPROG zg30  
TD 65536  
SOLVENT CDCl3  
NS 2  
DS 0  
SWH 8012.820 Hz  
FIDRES 0.122266 Hz  
AQ 4.0894966 sec  
RG 22.47  
DW 62.400 usec  
DE 6.50 usec  
TE 297.0 K  
D1 1.00000000 sec  
TD0 1

===== CHANNEL f1 =====  
SFO1 400.1324710 MHz  
NUC1 1H  
P1 14.50 usec  
SI 65536  
SF 400.1300000 MHz  
WDW EM  
SSB 0  
LB 0.30 Hz  
GB 0  
PC 1.00

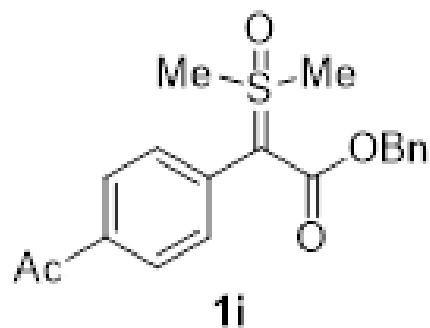

7.88  
7.86  
7.44  
7.42  
7.33  
7.31  
7.29  
7.28  
7.27  
7.25

5.14

3.43

2.56

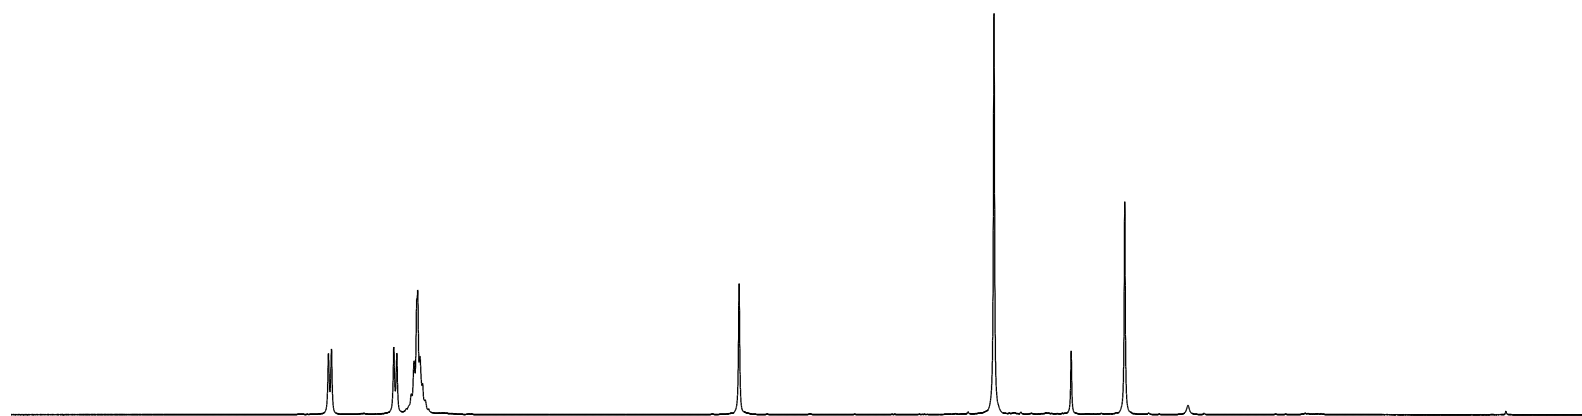

9

8

7

6

5

4

3

2

1

ppm

1.96

2.03

5.09

2.12

6.06

3.00

S-77

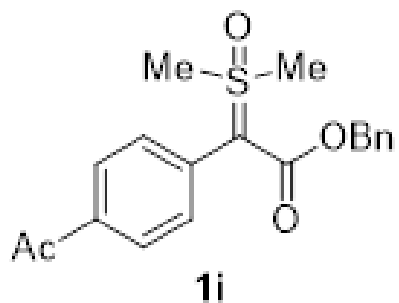

— 197.82

— 165.12

138.17  
137.37  
134.57  
132.42  
128.43  
128.11  
127.63  
127.44

— 70.13

— 64.71

— 43.48

— 26.60



```

NAME      CNMR-gwg-8-166-1
EXPNO     1
PROCNO    1
Date_     20200909
Time_     21.54
INSTRUM   spect
PROBHD    5 mm PABBO BB/
PULPROG   zgpg30
TD         65536
SOLVENT   CDCl3
NS         6
DS         0
SWH        24038.461 Hz
FIDRES     0.366798 Hz
AQ         1.3631988 sec
RG         196.92
DW         20.800 usec
DE         6.50 usec
TE         297.2 K
D1         2.00000000 sec
D11        0.03000000 sec
TD0        1
  
```

```

===== CHANNEL f1 =====
SF01      100.6228298 MHz
NUC1       13C
P1         9.70 usec
SI         32768
SF         100.6127690 MHz
WDW        EM
SSB        0
LB         1.00 Hz
GB         0
PC         1.40
  
```

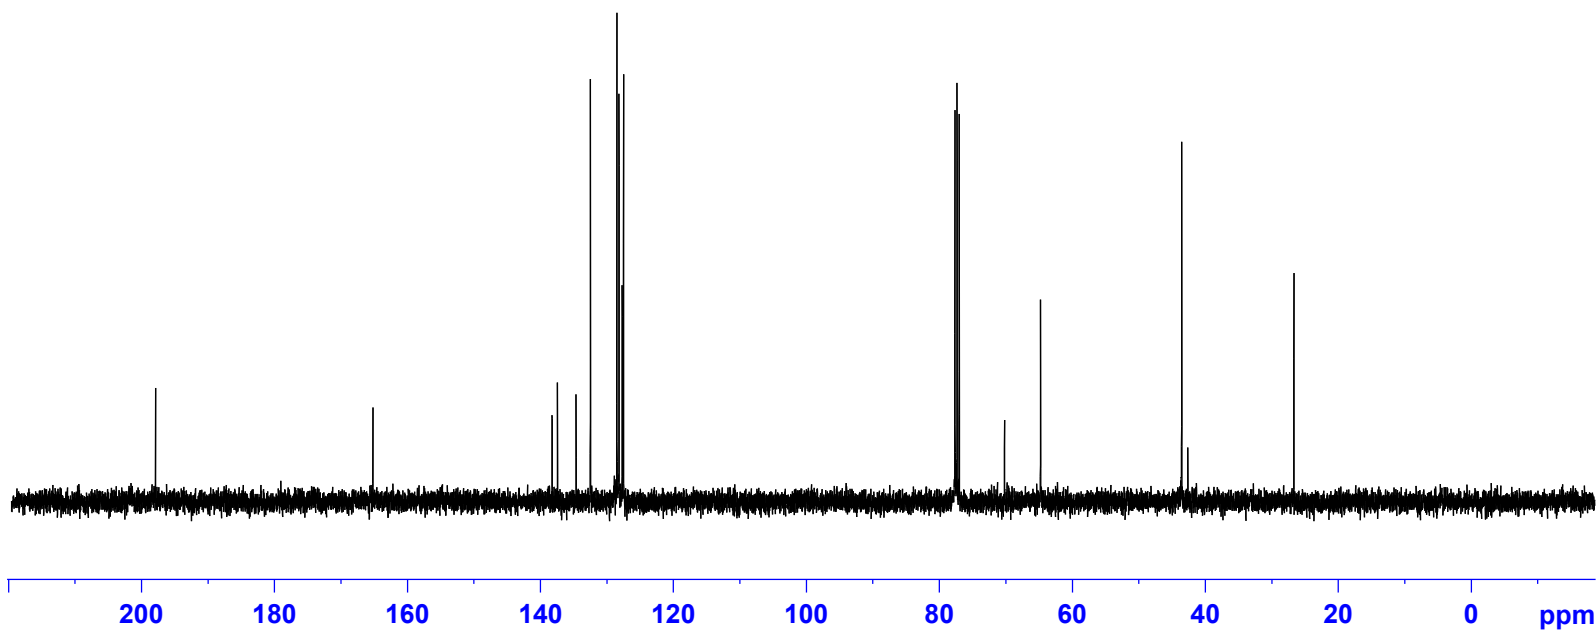

S-78

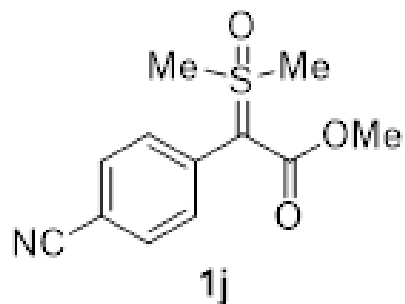

7.58  
7.57  
7.56  
7.56  
7.43  
7.43  
7.42  
7.41

3.66  
3.52

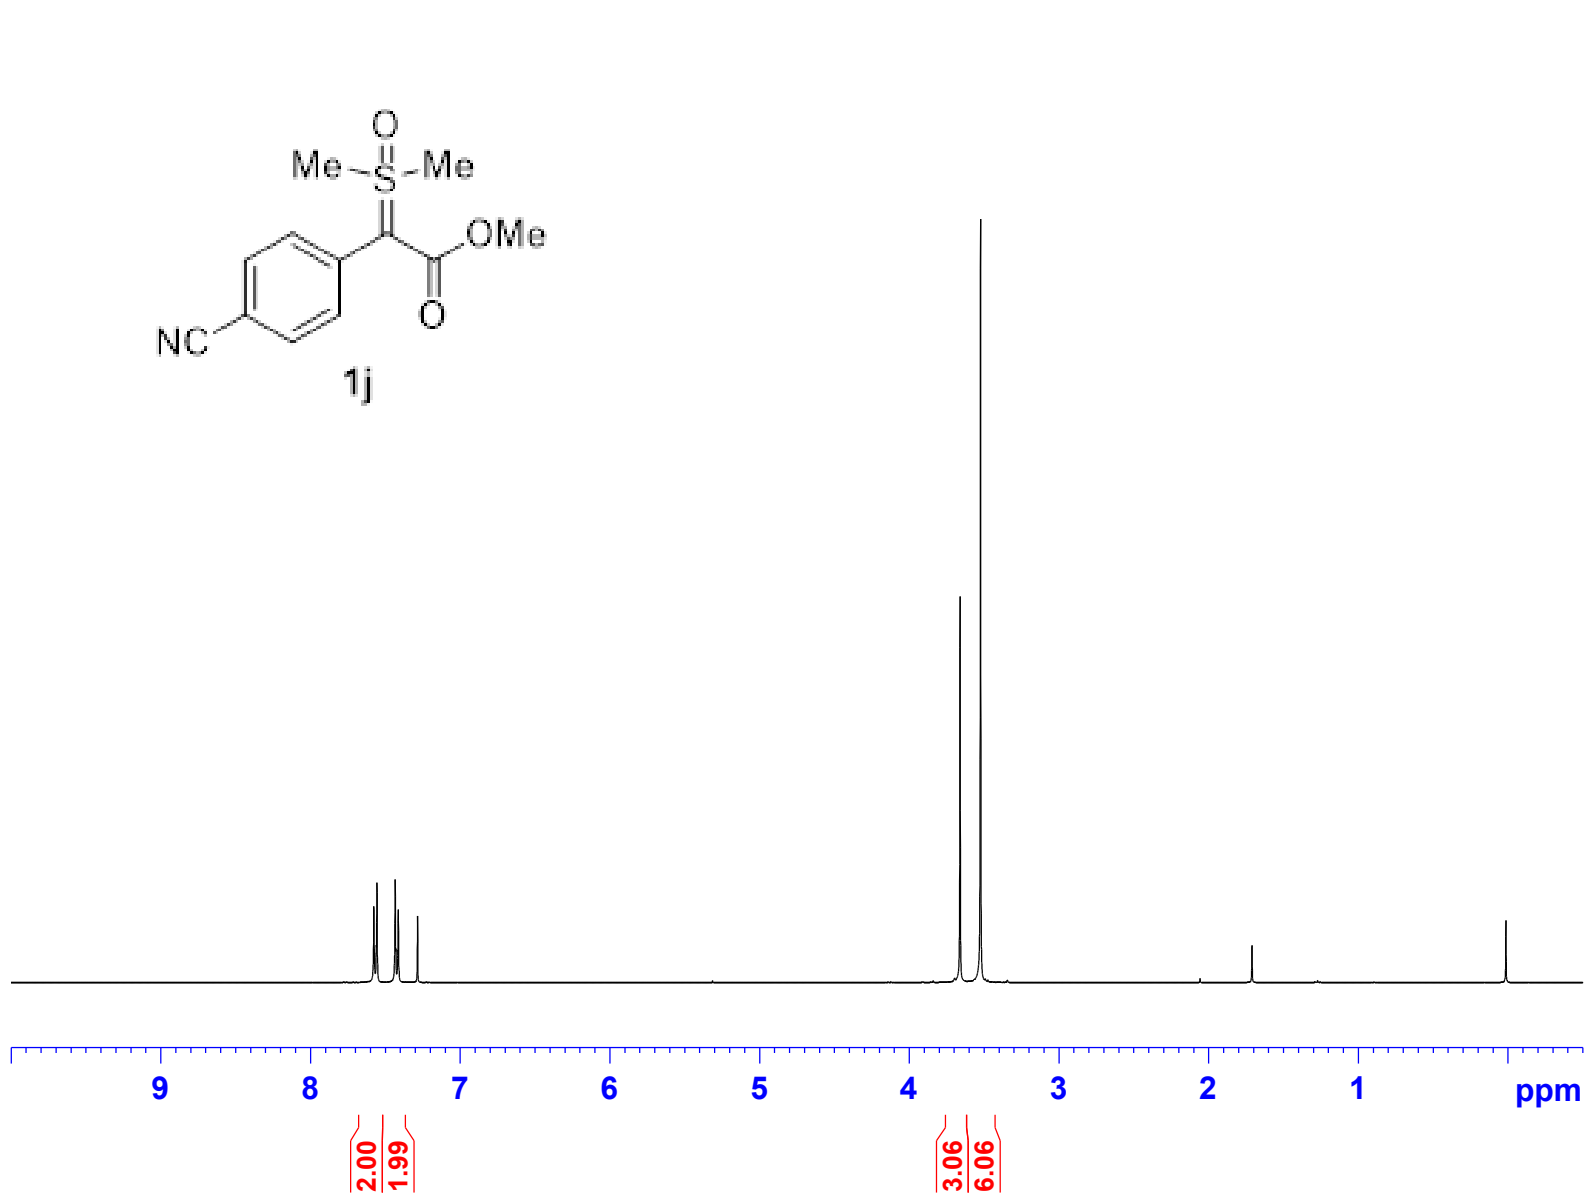

NAME HNMR-gwg-9-60-para-CN  
EXPNO 1  
PROCNO 1  
Date\_ 20201015  
Time\_ 19.44  
INSTRUM spect  
PROBHD 5 mm PABBO BB/  
PULPROG zg30  
TD 65536  
SOLVENT CDCl3  
NS 4  
DS 0  
SWH 8012.820 Hz  
FIDRES 0.122266 Hz  
AQ 4.0894966 sec  
RG 103.52  
DW 62.400 usec  
DE 6.50 usec  
TE 297.0 K  
D1 1.00000000 sec  
TD0 1

===== CHANNEL f1 =====  
SFO1 400.1324710 MHz  
NUC1 1H  
P1 14.50 usec  
SI 65536  
SF 400.1300000 MHz  
WDW EM  
SSB 0  
LB 0.30 Hz  
GB 0  
PC 1.00



NAME CNMR-gwg-9-60-para-CN  
EXPNO 1  
PROCNO 1  
Date\_ 20201015  
Time\_ 19.48  
INSTRUM spect  
PROBHD 5 mm PABBO BB/  
PULPROG zgpg30  
TD 65536  
SOLVENT CDC13  
NS 55  
DS 0  
SWH 24038.461 Hz  
FIDRES 0.366798 Hz  
AQ 1.3631988 sec  
RG 196.92  
DW 20.800 usec  
DE 6.50 usec  
TE 297.8 K  
D1 2.00000000 sec  
D11 0.03000000 sec  
TDO 1

==== CHANNEL f1 =====  
SF01 100.6228298 MHz  
NUC1 13C  
P1 9.70 usec  
SI 32768  
SF 100.6127690 MHz  
WDW EM  
SSB 0  
LB 1.00 Hz  
GB 0  
PC 1.40

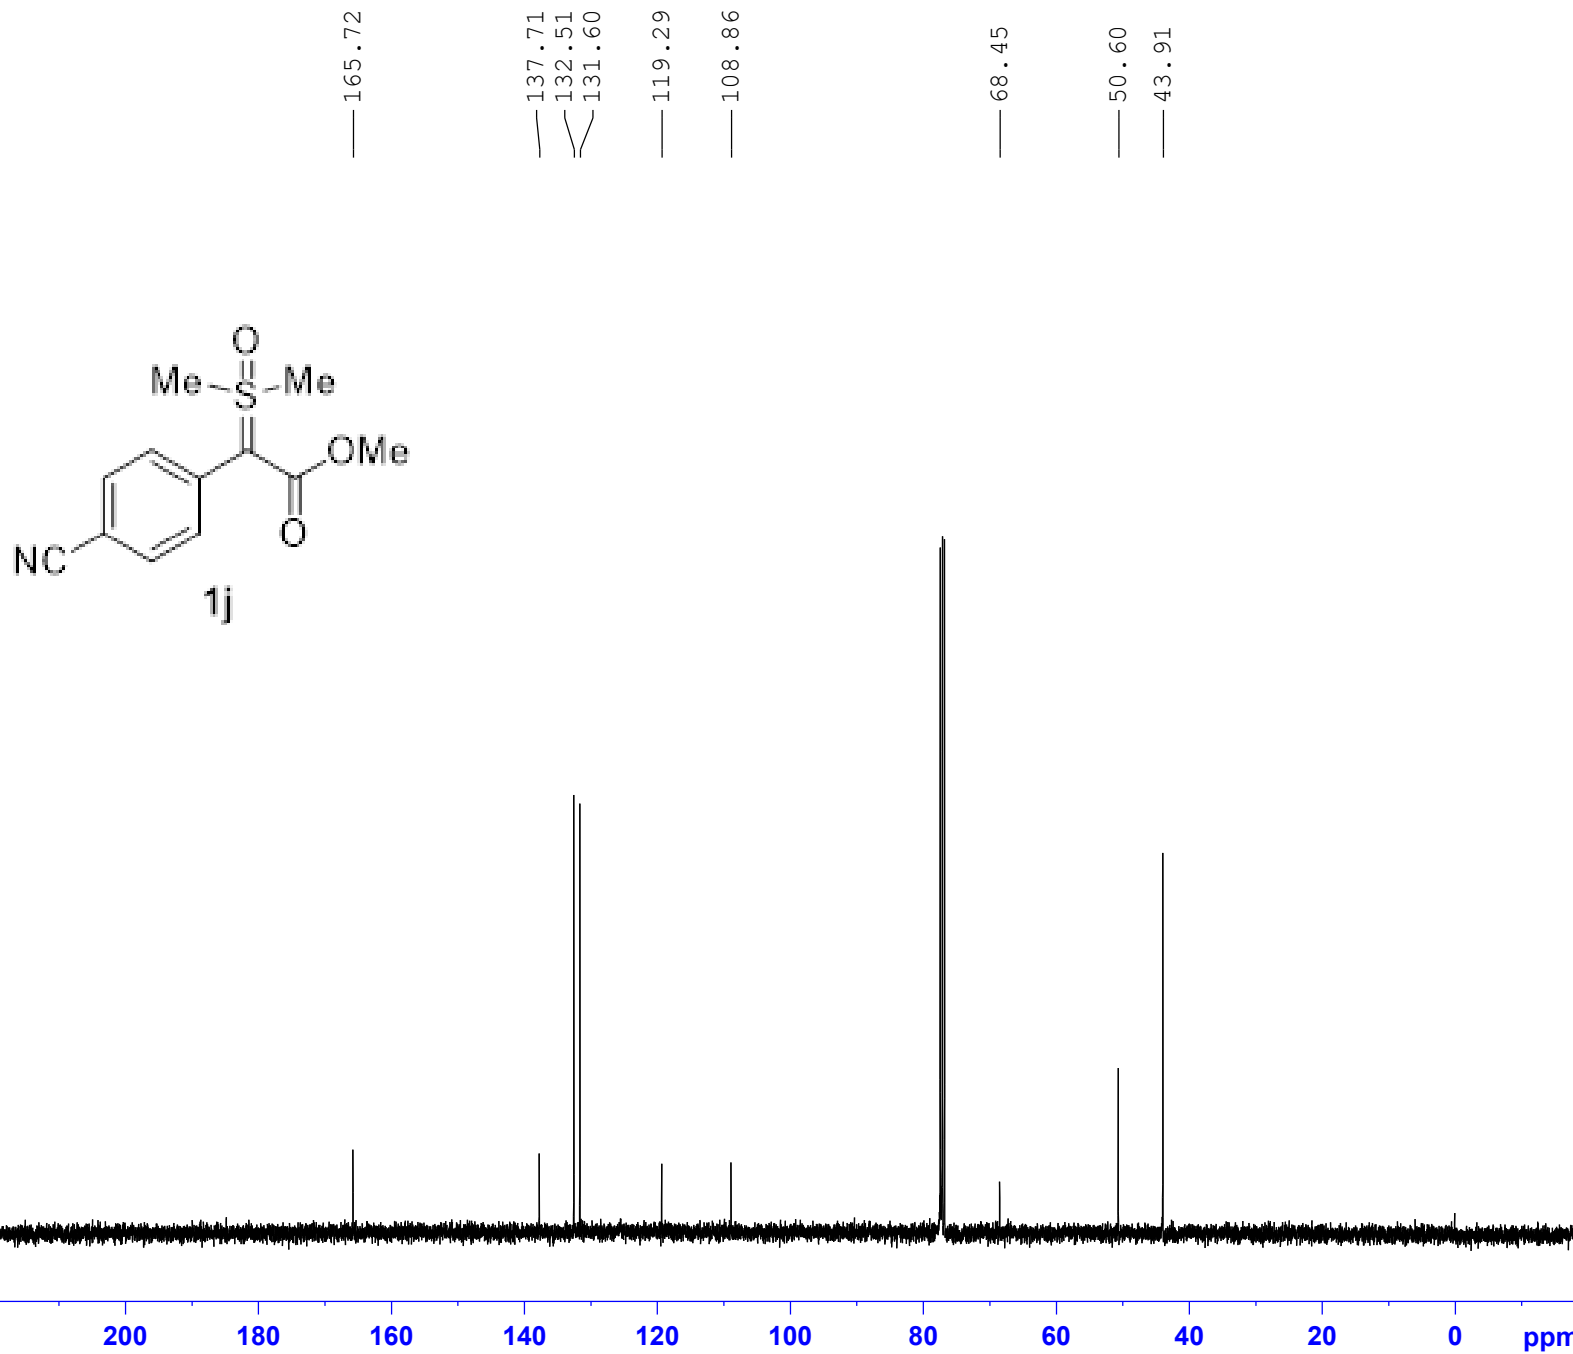



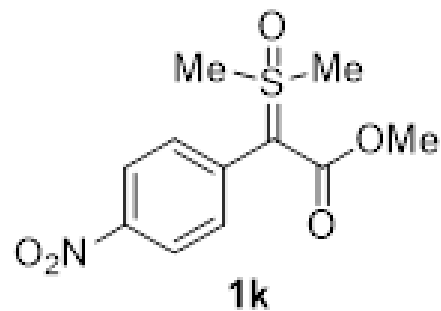

8.16  
8.14

7.49  
7.47

3.69  
3.56

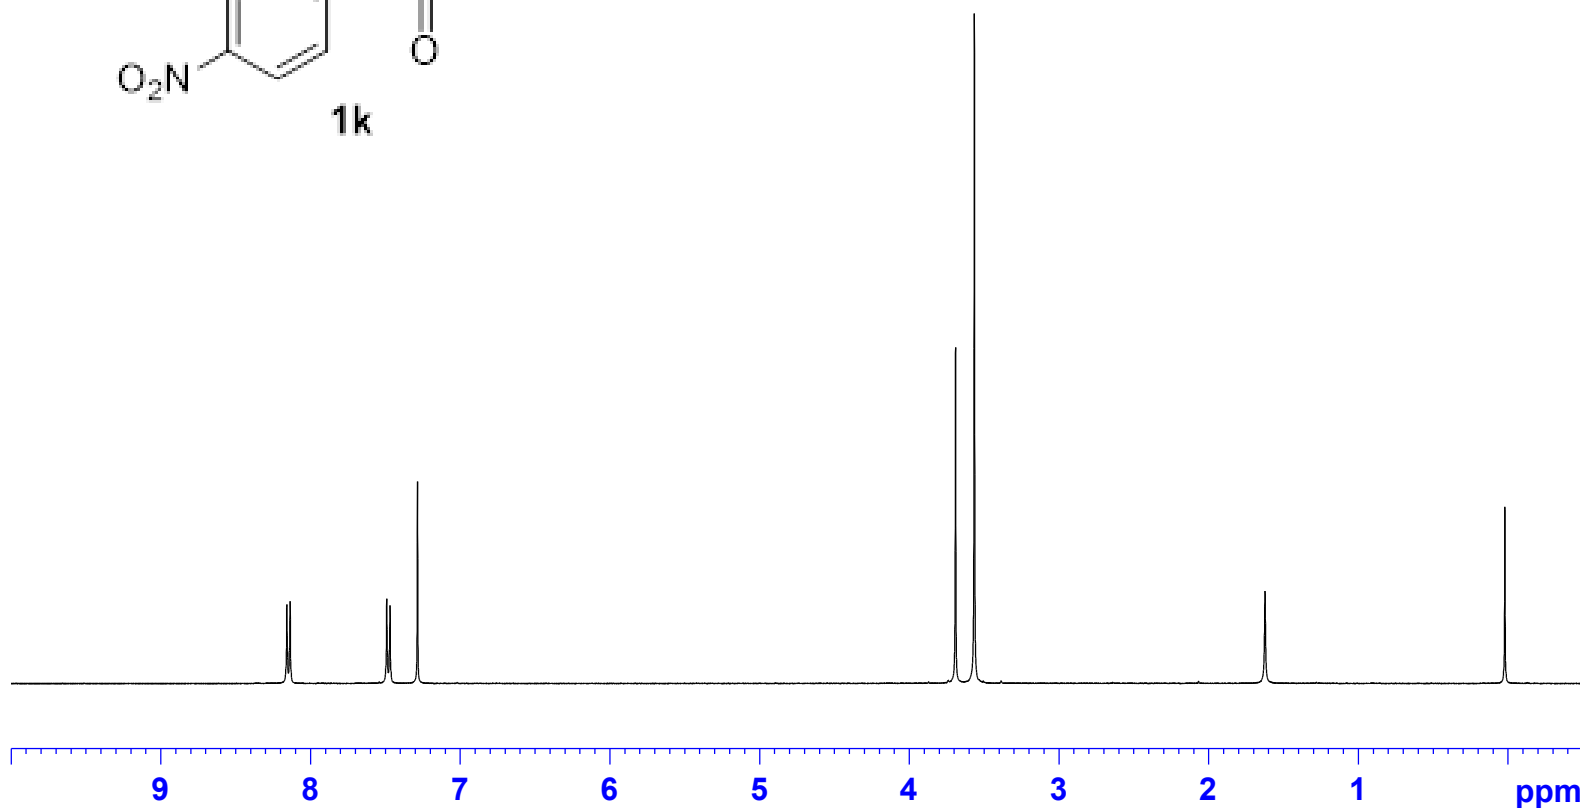

2.00

2.04

3.08  
6.04

S-81

NAME HNMR-gwg-9-60-para-NO2  
EXPNO 1  
PROCNO 1  
Date\_ 20201015  
Time\_ 19.26  
INSTRUM spect  
PROBHD 5 mm PABBO BB/  
PULPROG zg30  
TD 65536  
SOLVENT CDCl3  
NS 4  
DS 0  
SWH 8012.820 Hz  
FIDRES 0.122266 Hz  
AQ 4.0894966 sec  
RG 196.92  
DW 62.400 usec  
DE 6.50 usec  
TE 296.6 K  
D1 1.00000000 sec  
TD0 1

==== CHANNEL f1 =====  
SFO1 400.1324710 MHz  
NUC1 1H  
P1 14.50 usec  
SI 65536  
SF 400.1300000 MHz  
WDW EM  
SSB 0  
LB 0.30 Hz  
GB 0  
PC 1.00



NAME CNMR-gwg-9-60-para-NO2  
EXPNO 1  
PROCNO 1  
Date\_ 20201015  
Time\_ 19.37  
INSTRUM spect  
PROBHD 5 mm PABBO BB/  
PULPROG zgpg30  
TD 65536  
SOLVENT CDCl3  
NS 243  
DS 0  
SWH 24038.461 Hz  
FIDRES 0.366798 Hz  
AQ 1.3631988 sec  
RG 196.92  
DW 20.800 usec  
DE 6.50 usec  
TE 297.8 K  
D1 2.00000000 sec  
D11 0.03000000 sec  
TD0 1

==== CHANNEL f1 =====  
SF01 100.6228298 MHz  
NUC1 13C  
P1 9.70 usec  
SI 32768  
SF 100.6127690 MHz  
WDW EM  
SSB 0  
LB 1.00 Hz  
GB 0  
PC 1.40

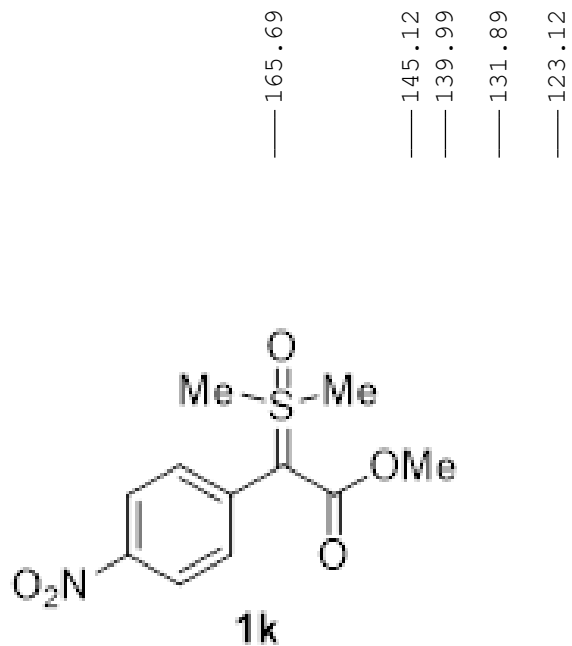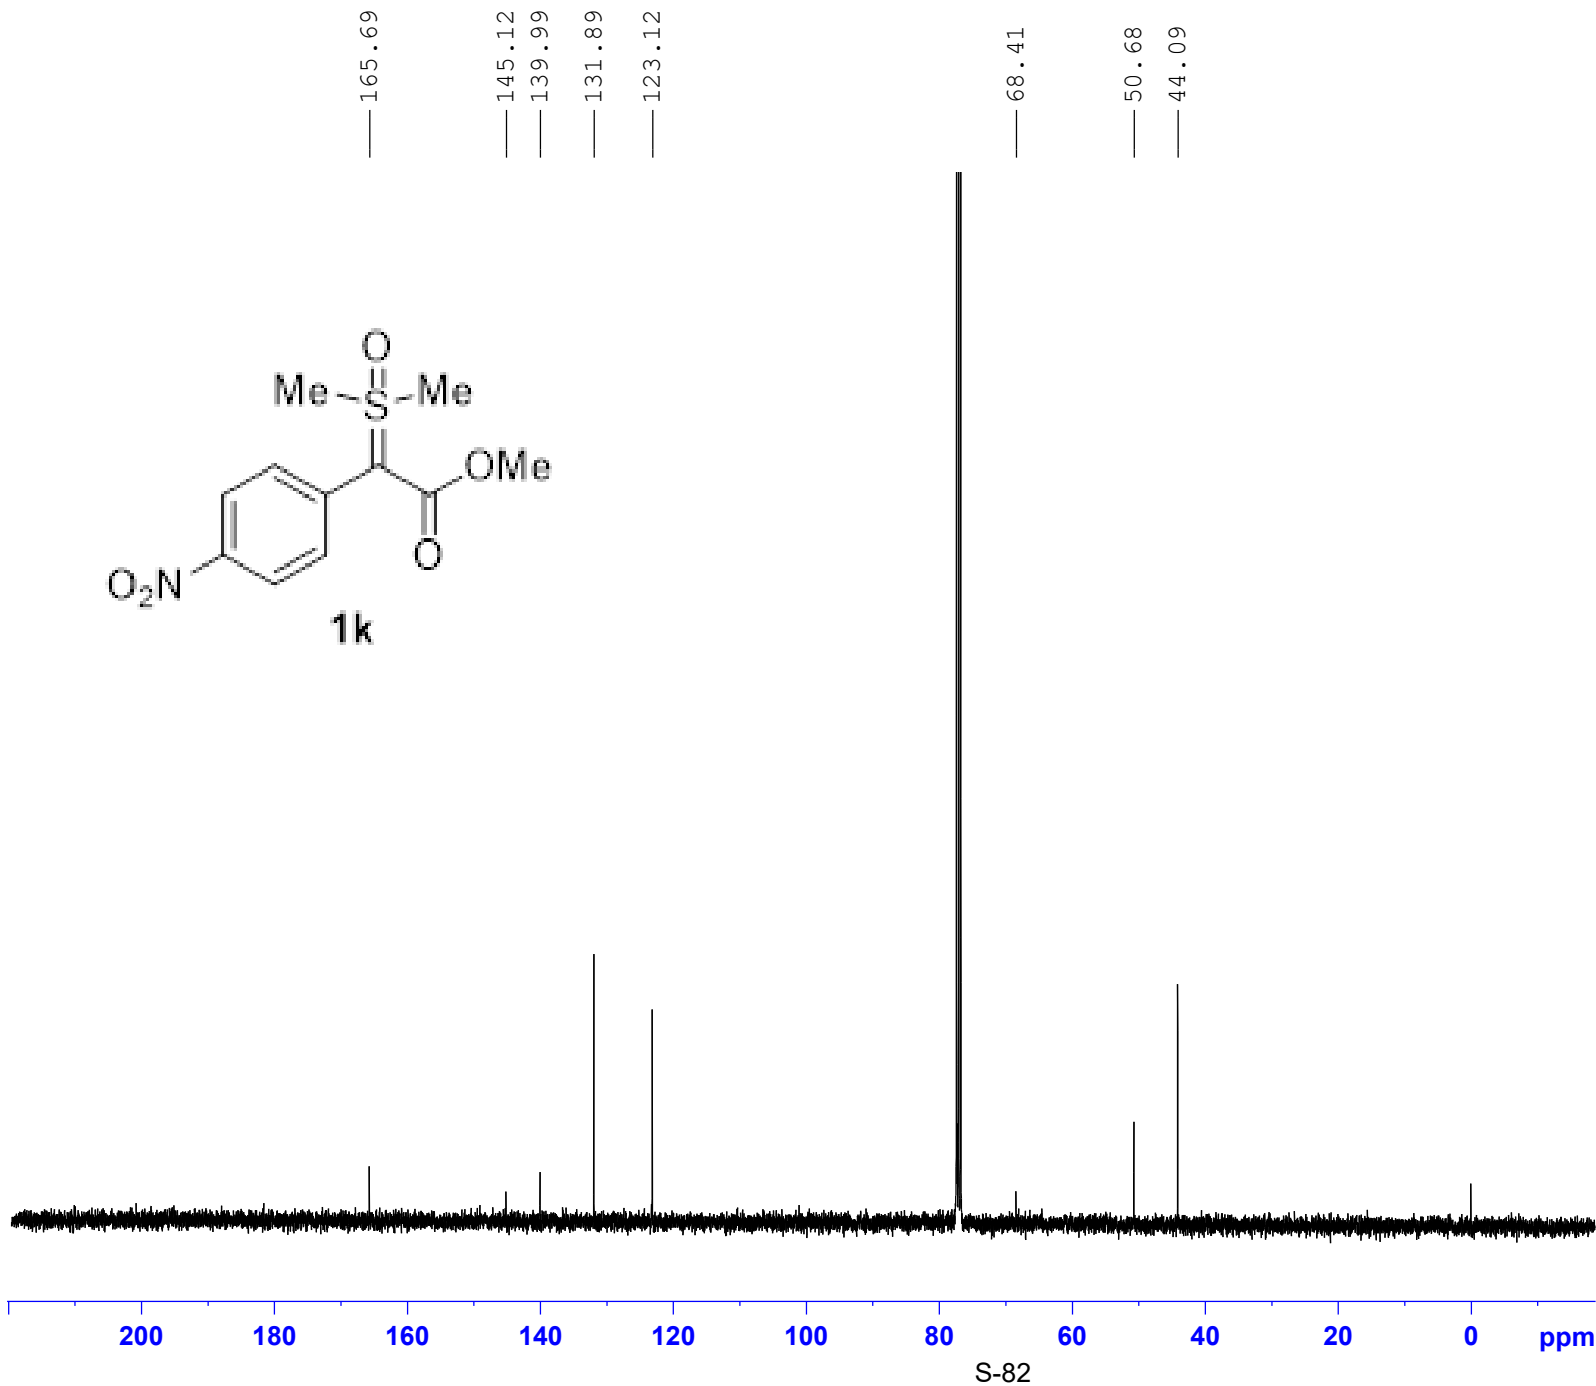



NAME HNMR-gwg-9-30-substrate  
EXPNO 1  
PROCNO 1  
Date\_ 20201003  
Time\_ 13.40  
INSTRUM spect  
PROBHD 5 mm PABBO BB/  
PULPROG zg30  
TD 65536  
SOLVENT CDC13  
NS 4  
DS 0  
SWH 8012.820 Hz  
FIDRES 0.122266 Hz  
AQ 4.0894966 sec  
RG 70.97  
DW 62.400 usec  
DE 6.50 usec  
TE 296.8 K  
D1 1.00000000 sec  
TD0 1

===== CHANNEL f1 =====  
SFO1 400.1324710 MHz  
NUC1 1H  
P1 14.50 usec  
SI 65536  
SF 400.1300000 MHz  
WDW EM  
SSB 0  
LB 0.30 Hz  
GB 0  
PC 1.00

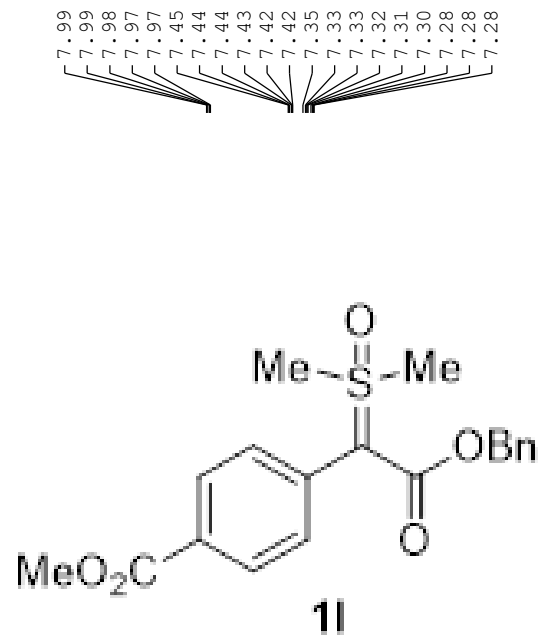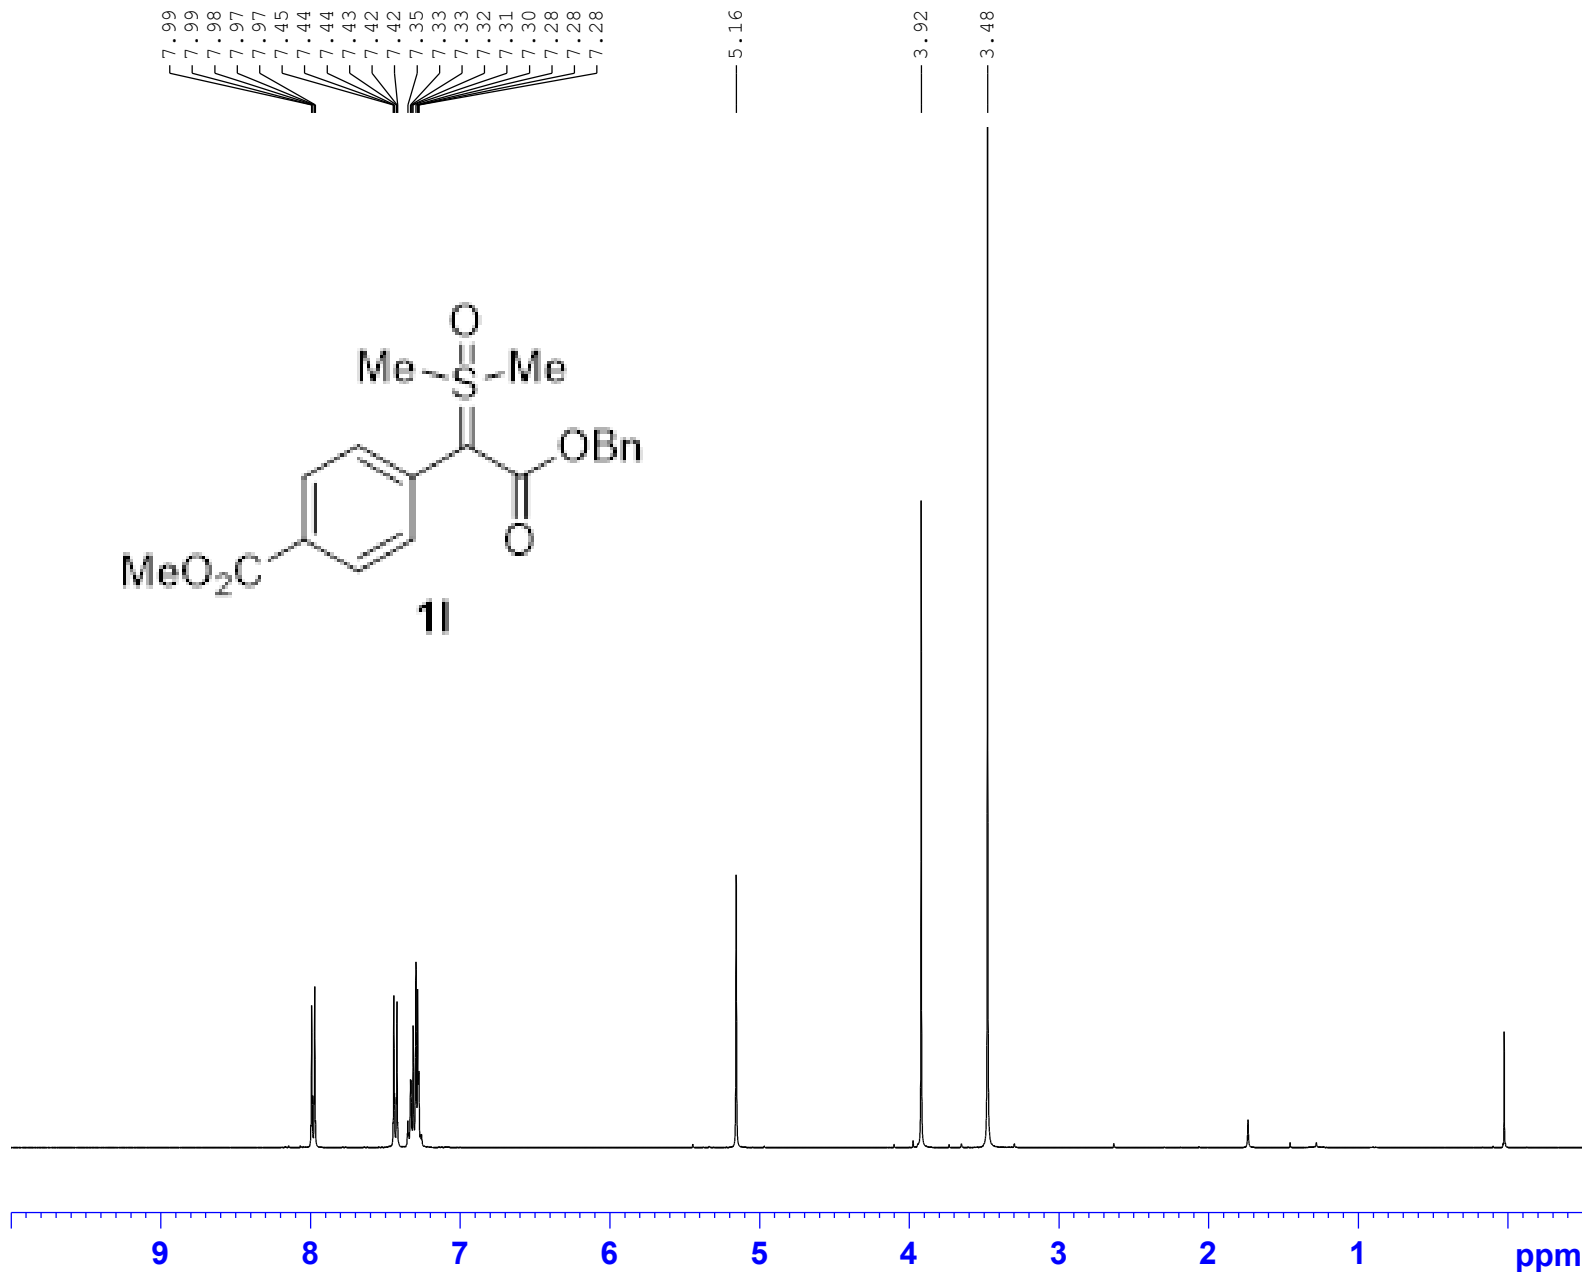

2.00

2.05

5.35

2.00

3.02

6.01

S-83

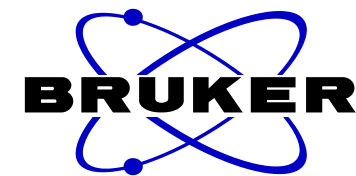

NAME CNMR-gwg-9-30-substrate  
EXPNO 1  
PROCNO 1  
Date\_ 20201003  
Time 13.44  
INSTRUM spect  
PROBHD 5 mm PABBO BB/  
PULPROG zgpg30  
TD 65536  
SOLVENT CDCl3  
NS 47  
DS 0  
SWH 24038.461 Hz  
FIDRES 0.366798 Hz  
AQ 1.3631988 sec  
RG 196.92  
DW 20.800 usec  
DE 6.50 usec  
TE 297.6 K  
D1 2.0000000 sec  
D11 0.0300000 sec  
TD0 1

==== CHANNEL f1 =====  
SFO1 100.6228298 MHz  
NUC1 13C  
P1 9.70 usec  
SI 32768  
SF 100.6127690 MHz  
WDW EM  
SSB 0  
LB 1.00 Hz  
GB 0  
PC 1.40

167.06  
165.24  
137.68  
137.35  
132.41  
129.32  
128.39  
127.69  
127.57  
127.37  
69.90  
64.71  
52.04  
43.58

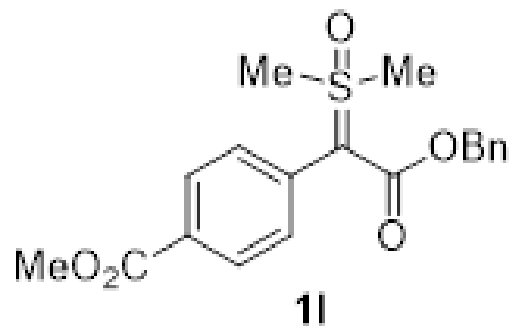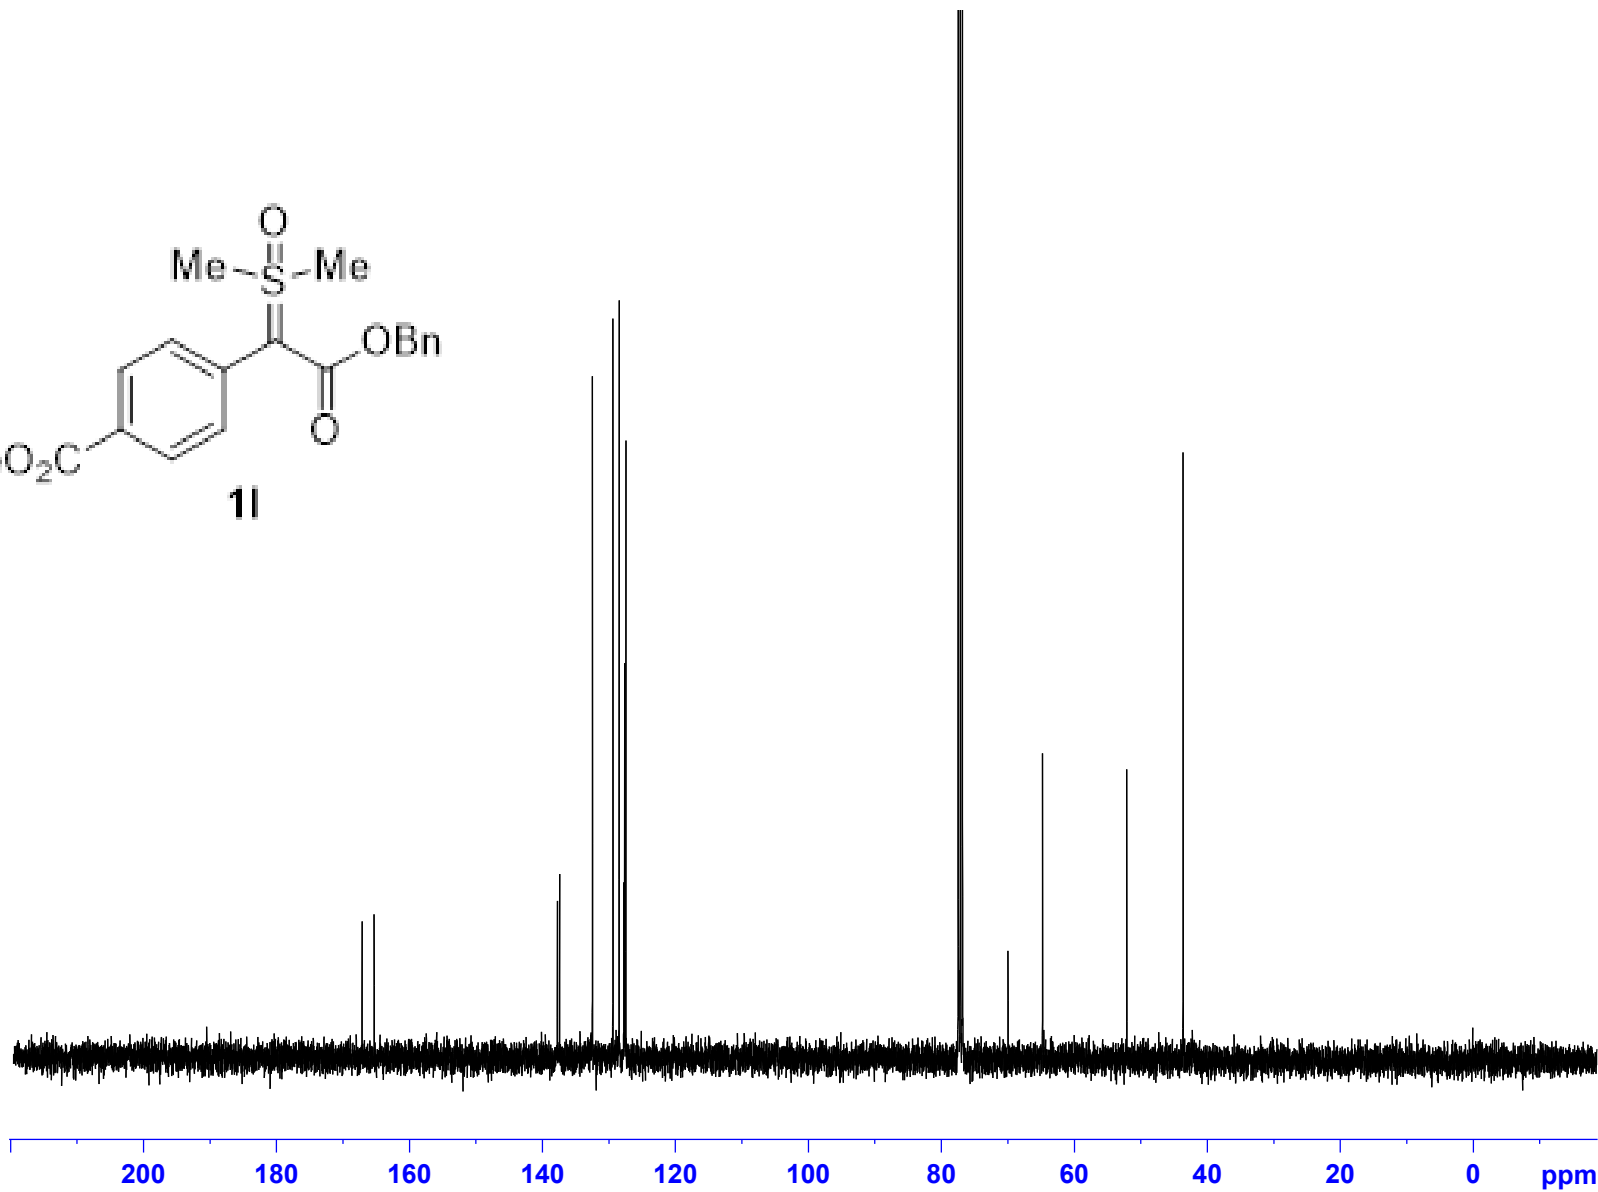

S-84



NAME HNMR-gwg-8-134-1  
EXPNO 1  
PROCNO 1  
Date\_ 20200901  
Time\_ 13.37  
INSTRUM spect  
PROBHD 5 mm PABBO BB/  
PULPROG zg30  
TD 65536  
SOLVENT CDCl3  
NS 1  
DS 0  
SWH 8012.820 Hz  
FIDRES 0.122266 Hz  
AQ 4.0894966 sec  
RG 31.55  
DW 62.400 usec  
DE 6.50 usec  
TE 296.9 K  
D1 1.00000000 sec  
TD0 1

==== CHANNEL f1 =====  
SFO1 400.1324710 MHz  
NUC1 1H  
P1 14.50 usec  
SI 65536  
SF 400.1300000 MHz  
WDW EM  
SSB 0  
LB 0.30 Hz  
GB 0  
PC 1.00

7.40  
7.39  
7.38  
7.37  
7.36  
7.35  
7.35  
7.34  
7.33  
7.33  
7.31  
7.28  
7.28  
7.27  
7.19  
7.17

5.15

3.42

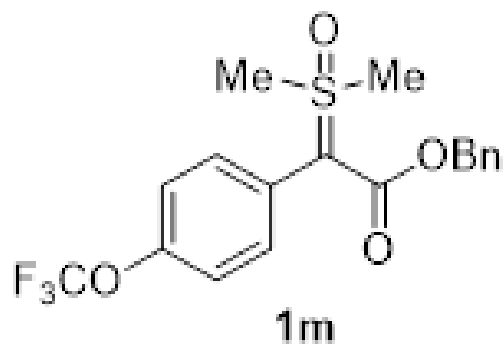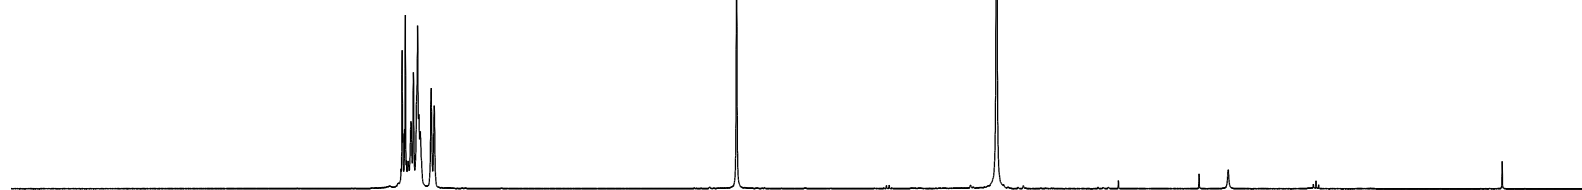

9 8 7 6 5 4 3 2 1 ppm

2.16  
5.11  
1.97

2.00

5.92

S-85

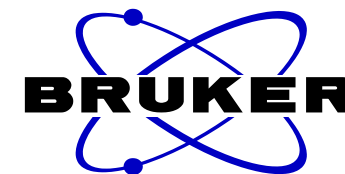

NAME CNMR-gwg-8-134-1  
EXPNO 1  
PROCNO 1  
Date\_ 20200901  
Time\_ 13.43  
INSTRUM spect  
PROBHD 5 mm PABBO BB/  
PULPROG zgpg30  
TD 65536  
SOLVENT CDCl3  
NS 69  
DS 0  
SWH 24038.461 Hz  
FIDRES 0.366798 Hz  
AQ 1.3631988 sec  
RG 196.92  
DW 20.800 usec  
DE 6.50 usec  
TE 297.6 K  
D1 2.00000000 sec  
D11 0.03000000 sec  
TD0 1

==== CHANNEL f1 =====  
SF01 100.6228298 MHz  
NUC1 13C  
P1 9.70 usec  
SI 32768  
SF 100.6127690 MHz  
WDW EM  
SSB 0  
LB 1.00 Hz  
GB 0  
PC 1.40

165.49  
148.04  
137.54  
134.82  
131.12  
128.37  
127.53  
127.27  
121.78  
120.63  
119.23  
116.67  
68.86  
64.55  
43.28

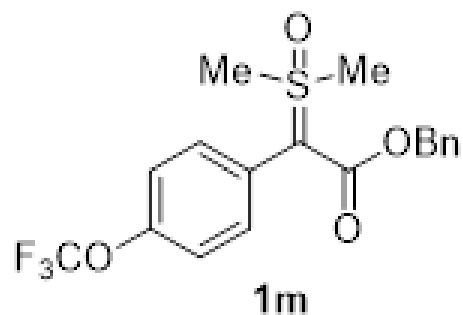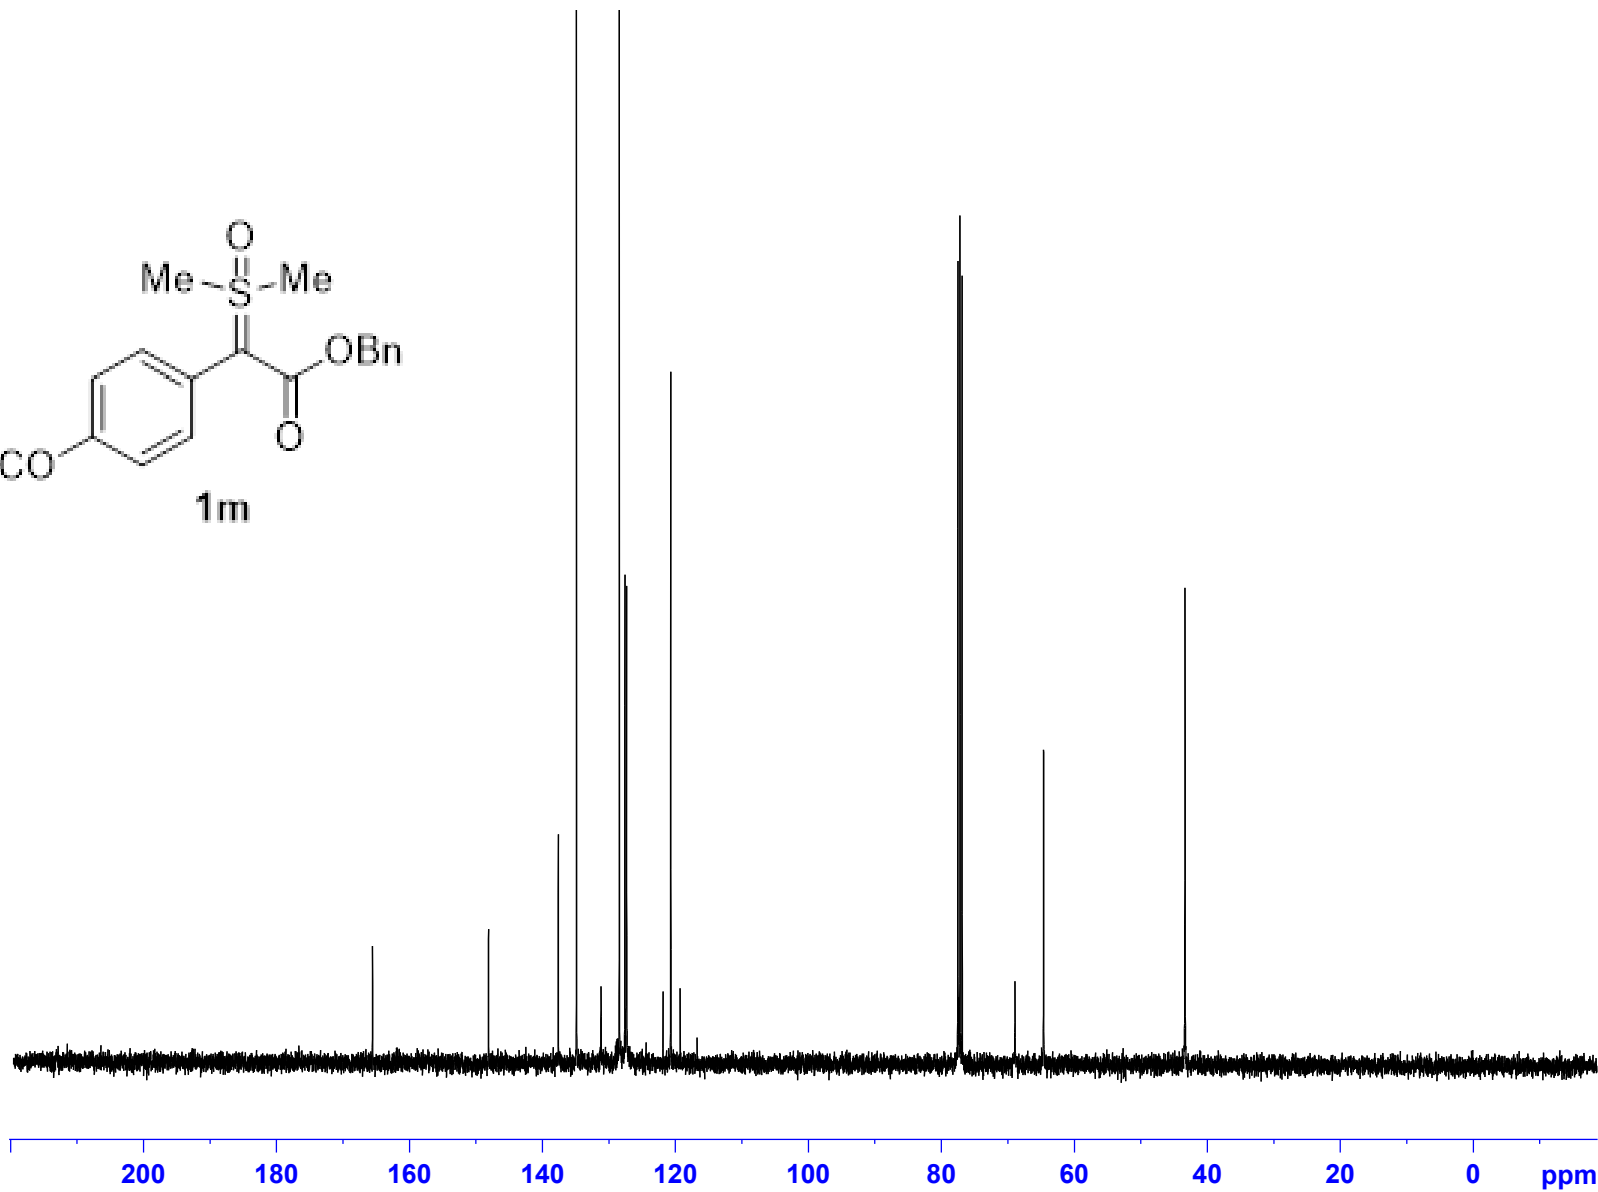



NAME FNMR-gwg-8-134-1  
EXPNO 1  
PROCNO 1  
Date\_ 20200901  
Time\_ 13.39  
INSTRUM spect  
PROBHD 5 mm PABBO BB/  
PULPROG zgpg30  
TD 65536  
SOLVENT CDCl3  
NS 4  
DS 0  
SWH 93750.000 Hz  
FIDRES 1.430511 Hz  
AQ 0.3495753 sec  
RG 196.92  
DW 5.333 usec  
DE 6.50 usec  
TE 296.9 K  
D1 2.00000000 sec  
D11 0.03000000 sec  
TD0 1

==== CHANNEL f1 =====  
SFO1 376.4607162 MHz  
NUC1 19F  
P1 14.70 usec  
SI 32768  
SF 376.4983660 MHz  
WDW EM  
SSB 0  
LB 1.00 Hz  
GB 0  
PC 1.40

— -57.69

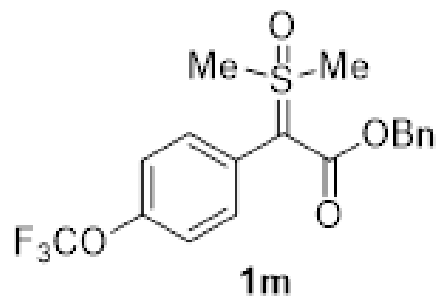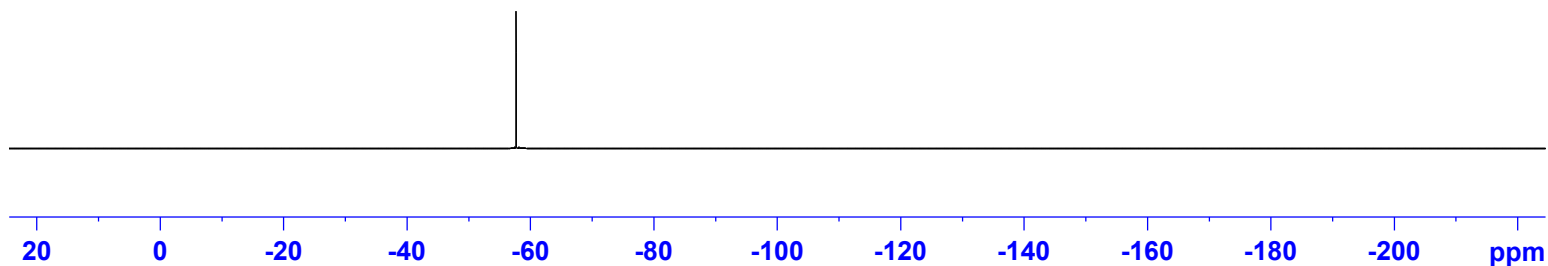

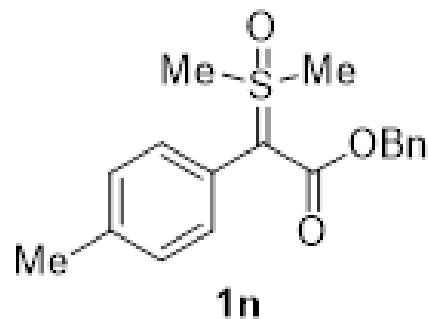

7.33  
7.31  
7.29  
7.27  
7.24  
7.22  
7.16  
7.14

5.14

3.35

2.36

NAME HNMR-gwg-8-171-1  
EXPNO 1  
PROCNO 1  
Date\_ 20200910  
Time\_ 18.17  
INSTRUM spect  
PROBHD 5 mm PABBO BB-  
PULPROG zg30  
TD 65536  
SOLVENT CDCl3  
NS 4  
DS 0  
SWH 8223.685 Hz  
FIDRES 0.125483 Hz  
AQ 3.9846387 sec  
RG 203  
DW 60.800 usec  
DE 6.00 usec  
TE 294.5 K  
D1 1.00000000 sec  
TD0 1

===== CHANNEL f1 =====  
NUC1 1H  
P1 15.80 usec  
PL1 -1.00 dB  
PL1W 12.17476940 W  
SFO1 400.1324710 MHz  
SI 32768  
SF 400.1300054 MHz  
WDW EM  
SSB 0  
LB 0.30 Hz  
GB 0  
PC 1.00

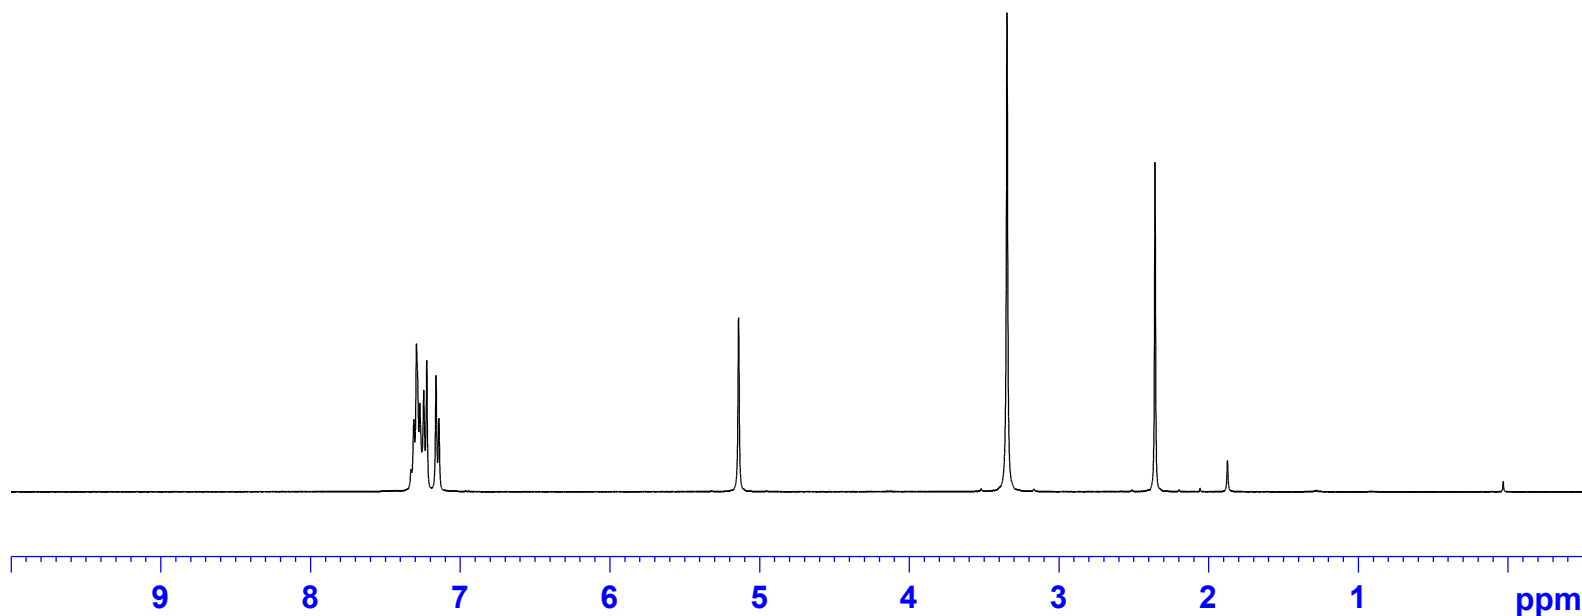

7.16  
2.03

2.00

6.00

3.01

S-88



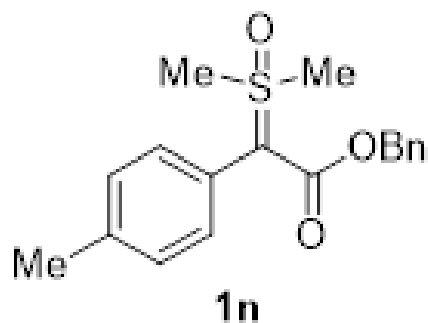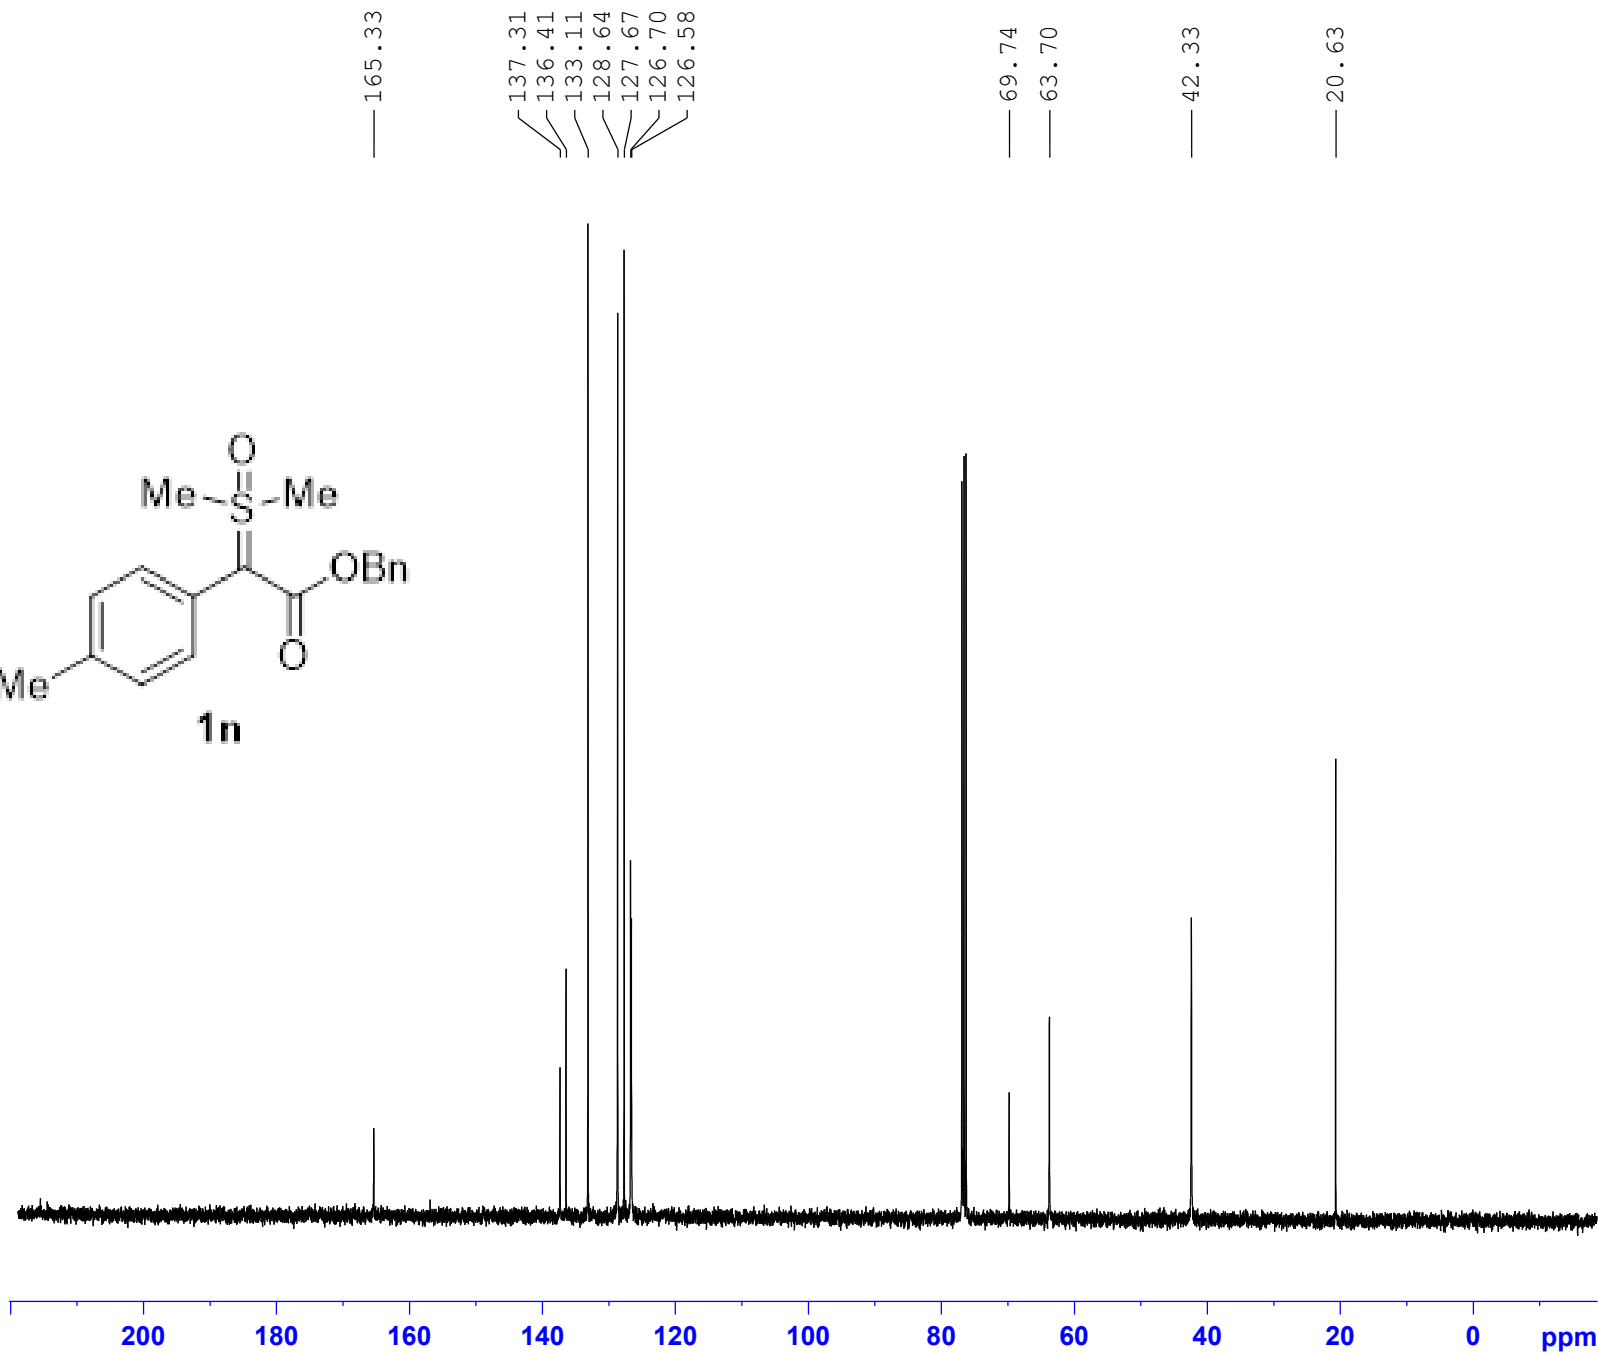

— 165.33

137.31  
136.41  
133.11  
128.64  
127.67  
126.70  
126.58

— 69.74

— 63.70

— 42.33

— 20.63

NAME CNMR-gwg-8-171-1  
EXPNO 1  
PROCNO 1  
Date\_ 20200910  
Time\_ 18.22  
INSTRUM spect  
PROBHD 5 mm PABBO BB-  
PULPROG zgpg30  
TD 65536  
SOLVENT CDCl3  
NS 139  
DS 0  
SWH 24038.461 Hz  
FIDRES 0.366798 Hz  
AQ 1.3631988 sec  
RG 114  
DW 20.800 usec  
DE 6.00 usec  
TE 295.0 K  
D1 2.00000000 sec  
D11 0.03000000 sec  
TD0 1

==== CHANNEL f1 =====  
NUC1 13C  
P1 8.60 usec  
PL1 -3.00 dB  
PL1W 60.64365387 W  
SFO1 100.6228298 MHz

==== CHANNEL f2 =====  
CPDPRG2 waltz16  
NUC2 1H  
PCPD2 80.00 usec  
PL2 -1.00 dB  
PL12 14.39 dB  
PL13 18.00 dB  
PL2W 12.17476940 W  
PL12W 0.35193357 W  
PL13W 0.15327126 W  
SFO2 400.1316005 MHz  
SI 32768  
SF 100.6128330 MHz  
WDW EM  
SSB 0  
LB 1.00 Hz  
GB 0  
PC 1.40



NAME HNMR-gwg-8-149-2  
EXPNO 1  
PROCNO 1  
Date\_ 20200905  
Time\_ 13.12  
INSTRUM spect  
PROBHD 5 mm PABBO BB/  
PULPROG zg30  
TD 65536  
SOLVENT CDCl3  
NS 4  
DS 0  
SWH 8012.820 Hz  
FIDRES 0.122266 Hz  
AQ 4.0894966 sec  
RG 88.84  
DW 62.400 usec  
DE 6.50 usec  
TE 296.7 K  
D1 1.00000000 sec  
TD0 1

==== CHANNEL f1 =====  
SFO1 400.1324710 MHz  
NUC1 1H  
P1 14.50 usec  
SI 65536  
SF 400.1300000 MHz  
WDW EM  
SSB 0  
LB 0.30 Hz  
GB 0  
PC 1.00

7.86  
7.84  
7.83  
7.82  
7.81  
7.51  
7.51  
7.50  
7.49  
7.49  
7.49  
7.48  
7.46  
7.46  
7.33  
7.33  
7.31  
7.31  
7.30  
7.28  
7.28  
7.27  
7.27  
7.26  
7.26  
7.25  
7.24  
7.23  
5.18

3.45

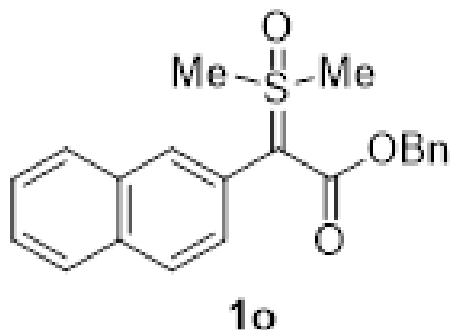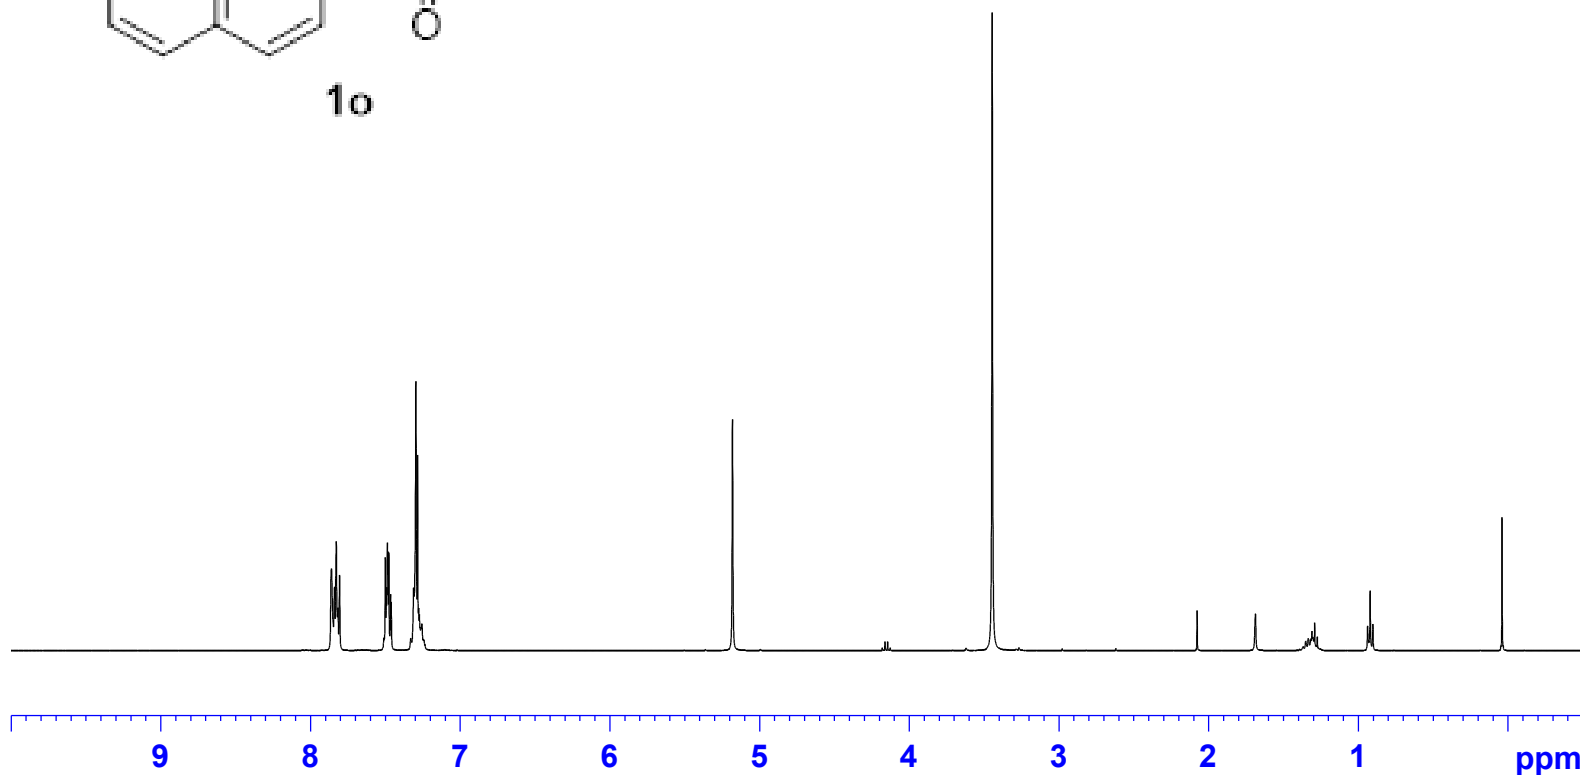

3.99  
3.02  
5.28

2.00

5.93

S-90



NAME CNMR-gwg-8-149-2  
EXPNO 1  
PROCNO 1  
Date\_ 20200905  
Time\_ 13.18  
INSTRUM spect  
PROBHD 5 mm PABBO BB/  
PULPROG zgpg30  
TD 65536  
SOLVENT CDCl3  
NS 55  
DS 0  
SWH 24038.461 Hz  
FIDRES 0.366798 Hz  
AQ 1.3631988 sec  
RG 196.92  
DW 20.800 usec  
DE 6.50 usec  
TE 297.4 K  
D1 2.00000000 sec  
D11 0.03000000 sec  
TD0 1

==== CHANNEL f1 =====  
SF01 100.6228298 MHz  
NUC1 13C  
P1 9.70 usec  
SI 32768  
SF 100.6127690 MHz  
WDW EM  
SSB 0  
LB 1.00 Hz  
GB 0  
PC 1.40

— 165.82  
— 137.71  
— 133.51  
— 132.40  
— 131.87  
— 131.83  
— 130.03  
— 128.31  
— 127.91  
— 127.82  
— 127.55  
— 127.39  
— 127.29  
— 126.00  
— 125.95  
— 70.96  
— 64.51  
— 43.19

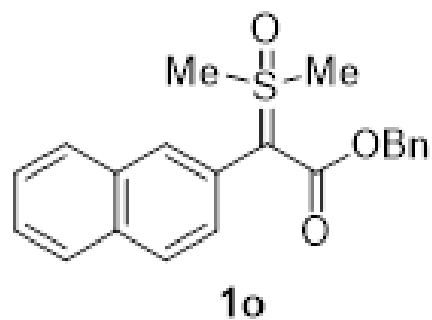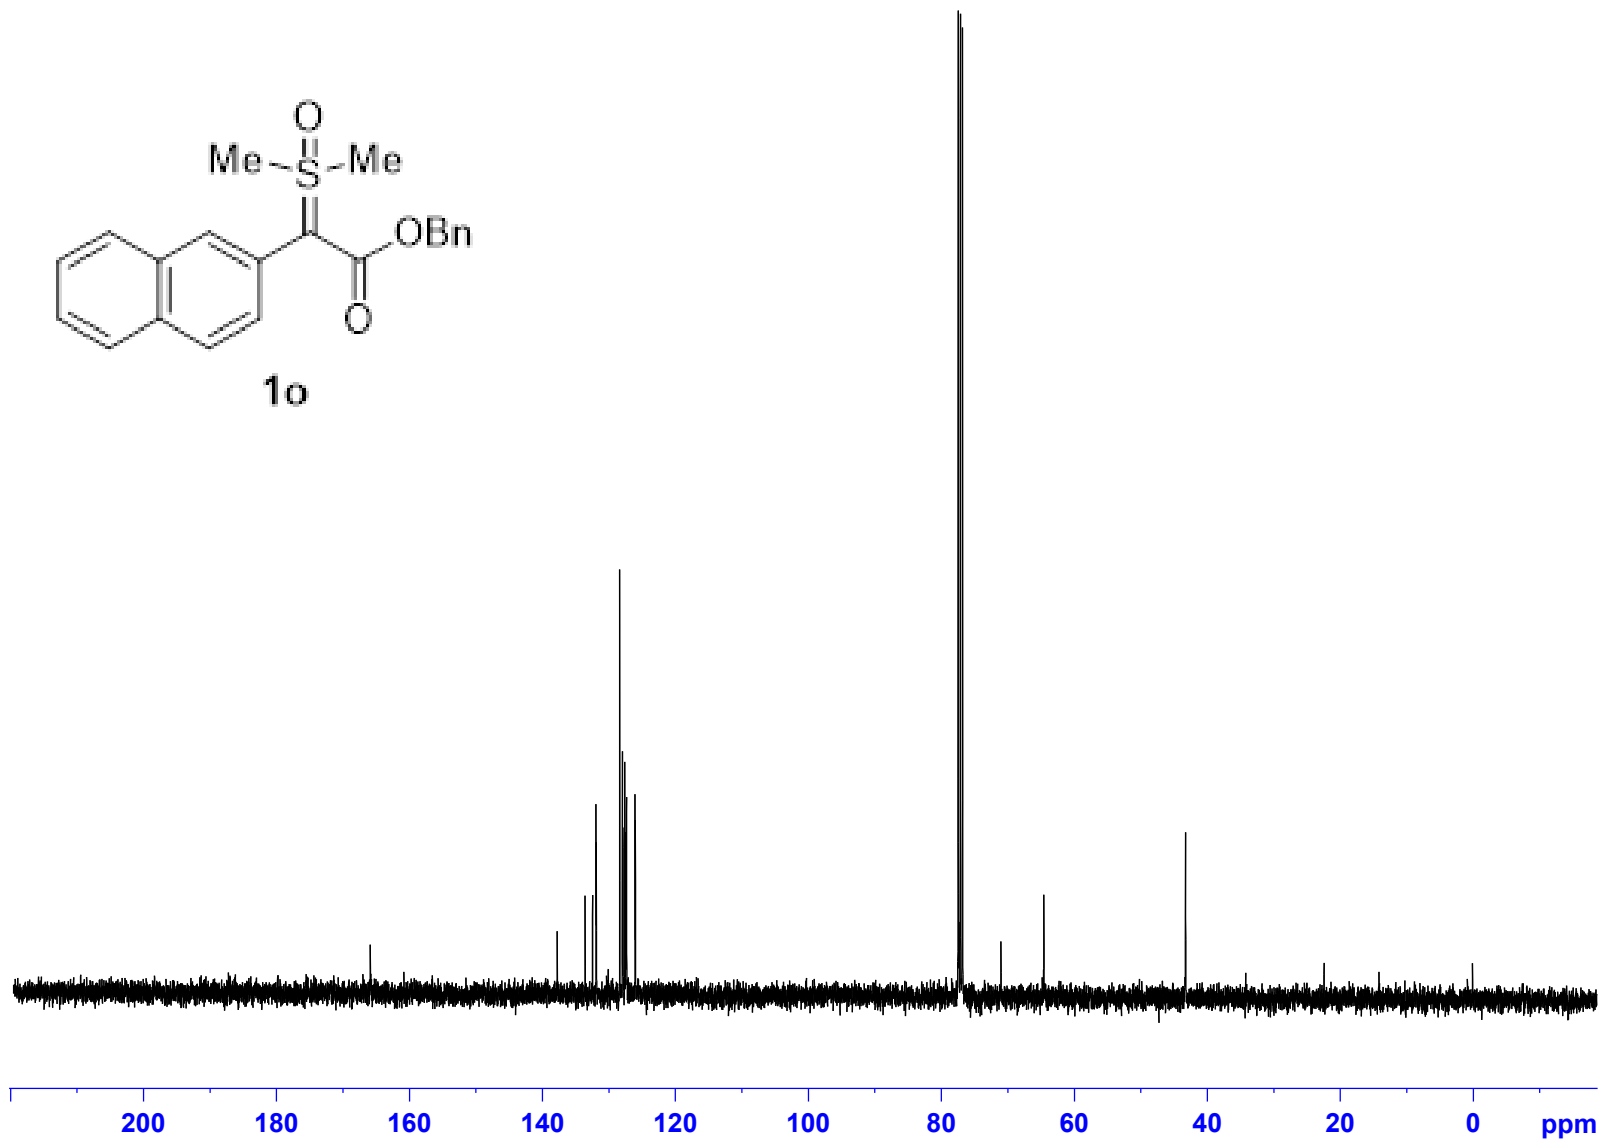

S-91



NAME HNMR-gwg-8-190-2  
EXPNO 1  
PROCNO 1  
Date\_ 20200917  
Time\_ 16.44  
INSTRUM spect  
PROBHD 5 mm PABBO BB/  
PULPROG zg30  
TD 65536  
SOLVENT CD2Cl2  
NS 4  
DS 0  
SWH 8012.820 Hz  
FIDRES 0.122266 Hz  
AQ 4.0894966 sec  
RG 103.52  
DW 62.400 usec  
DE 6.50 usec  
TE 296.3 K  
D1 1.00000000 sec  
TD0 1

==== CHANNEL f1 =====  
SFO1 400.1324710 MHz  
NUC1 1H  
P1 14.50 usec  
SI 65536  
SF 400.1300000 MHz  
WDW EM  
SSB 0  
LB 0.30 Hz  
GB 0  
PC 1.00

7.34  
7.33  
7.32  
7.32  
7.19  
7.19  
7.18  
7.03  
7.02  
7.01  
7.01

3.61  
3.40

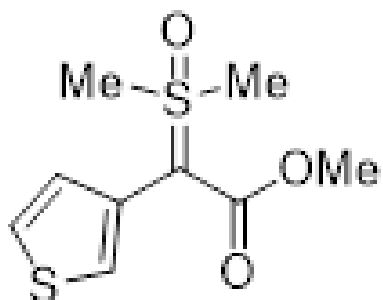

1p

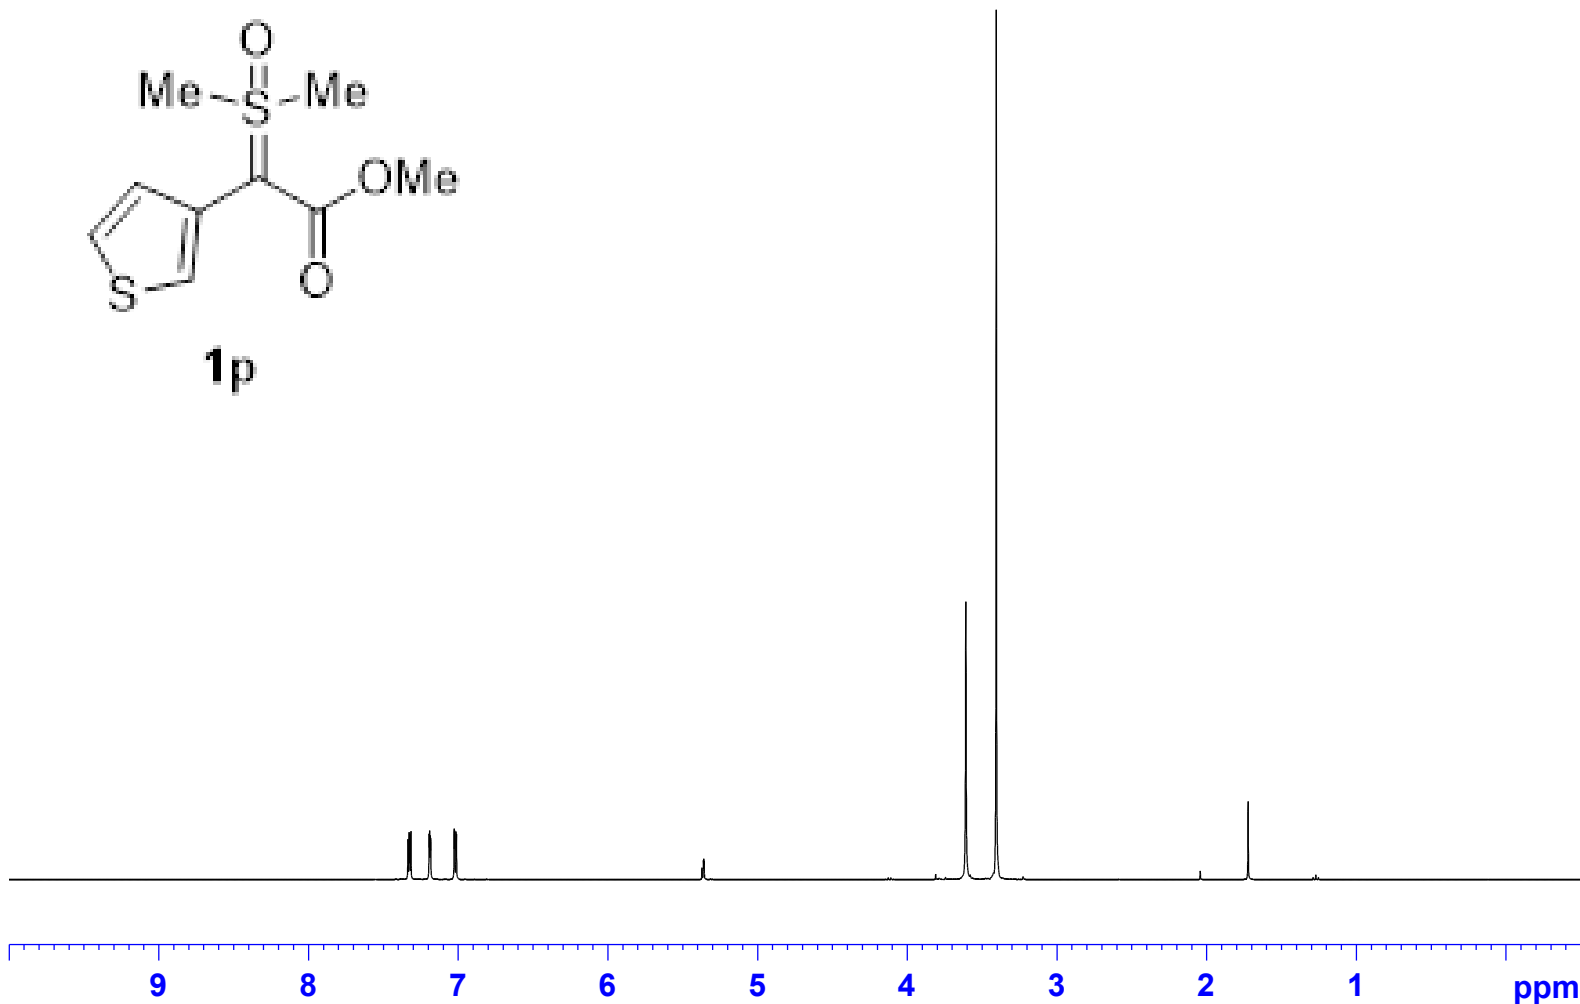

1.00  
0.96  
0.99

3.13  
6.32

S-92



NAME CNMR-gwg-8-190-2  
EXPNO 1  
PROCNO 1  
Date\_ 20200917  
Time\_ 16.46  
INSTRUM spect  
PROBHD 5 mm PABBO BB/  
PULPROG zgpg30  
TD 65536  
SOLVENT CD2Cl2  
NS 248  
DS 0  
SWH 24038.461 Hz  
FIDRES 0.366798 Hz  
AQ 1.3631988 sec  
RG 196.92  
DW 20.800 usec  
DE 6.50 usec  
TE 296.8 K  
D1 2.00000000 sec  
D11 0.03000000 sec  
TD0 1

==== CHANNEL f1 =====  
SF01 100.6228298 MHz  
NUC1 13C  
P1 9.70 usec  
SI 32768  
SF 100.6127690 MHz  
WDW EM  
SSB 0  
LB 1.00 Hz  
GB 0  
PC 1.40

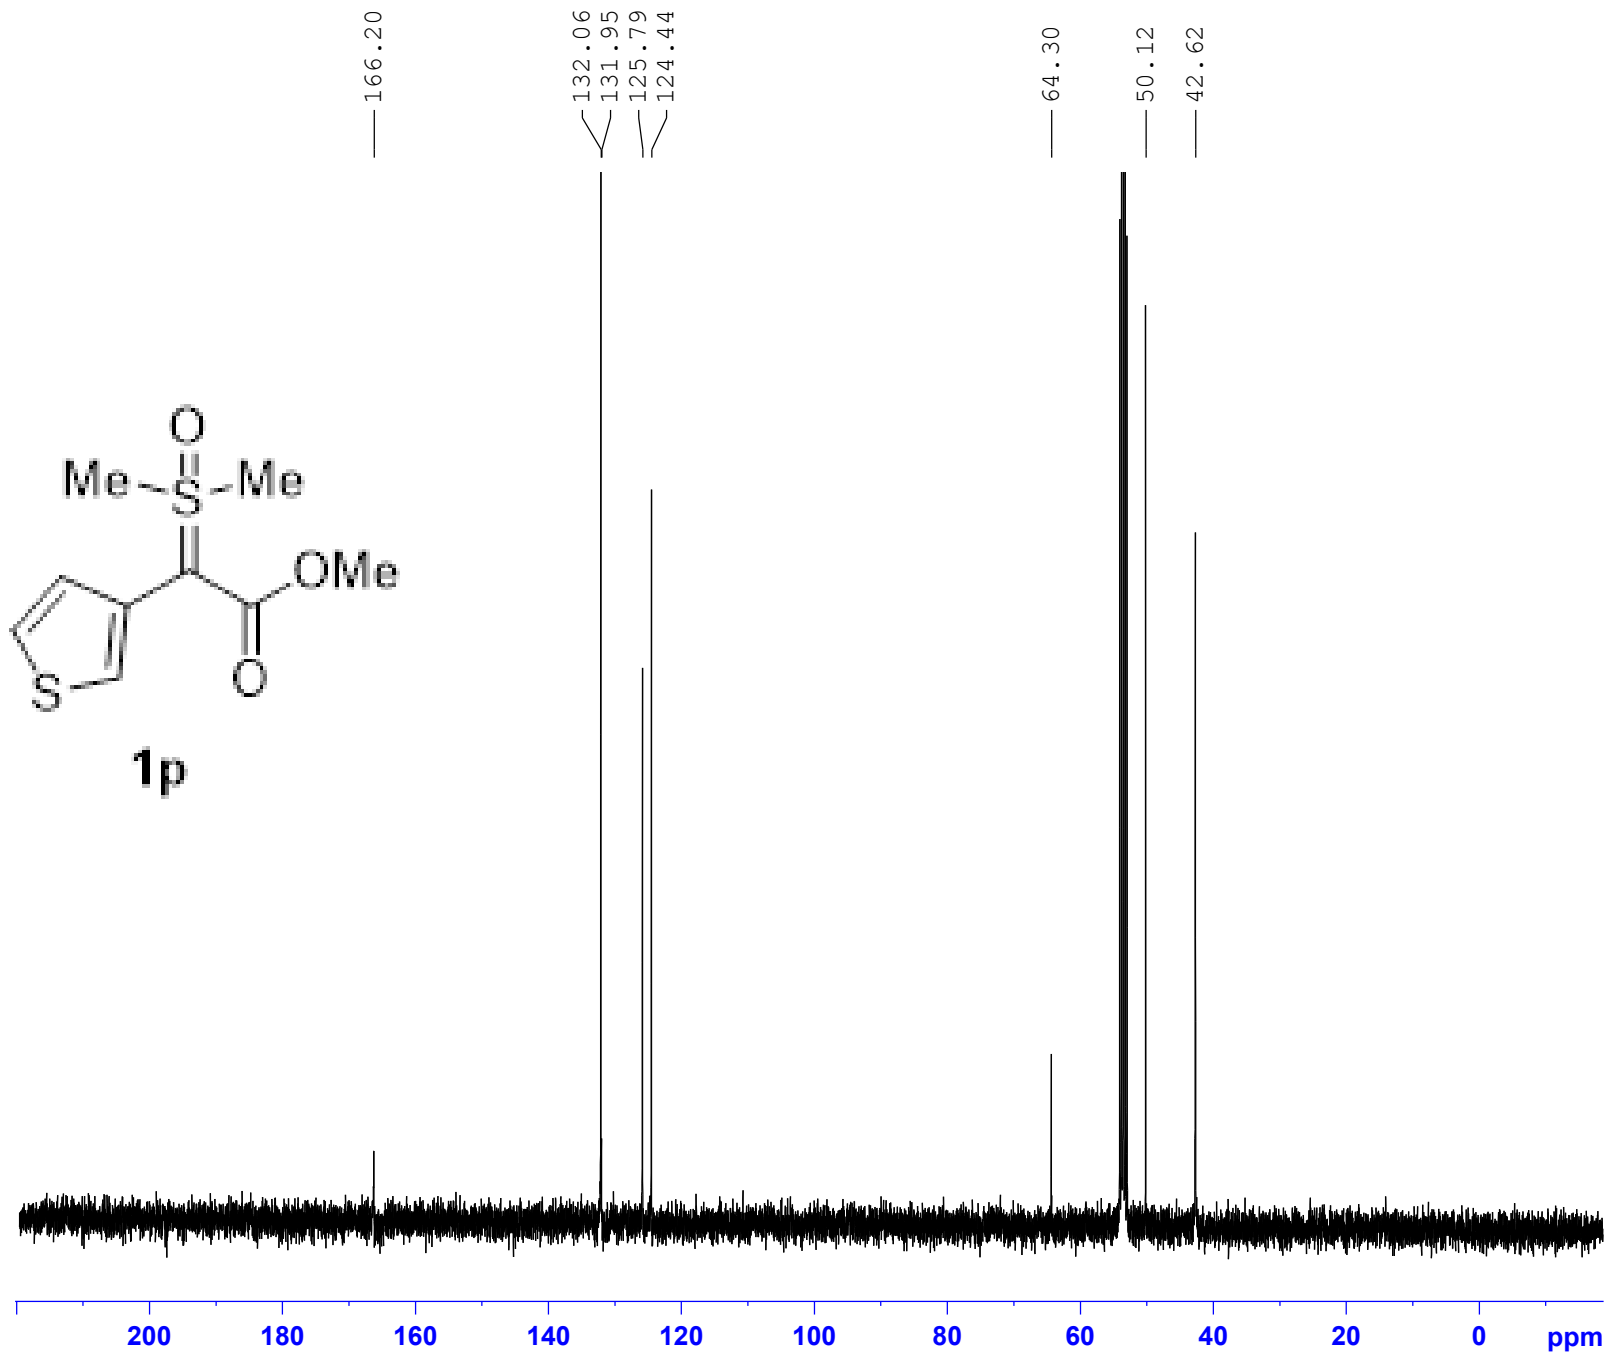

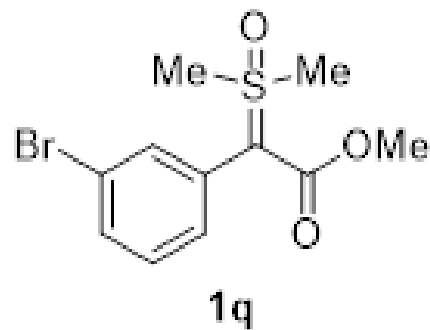

7.46  
7.38  
7.36  
7.28  
7.25  
7.23  
7.20  
7.18  
7.16

3.61  
3.42

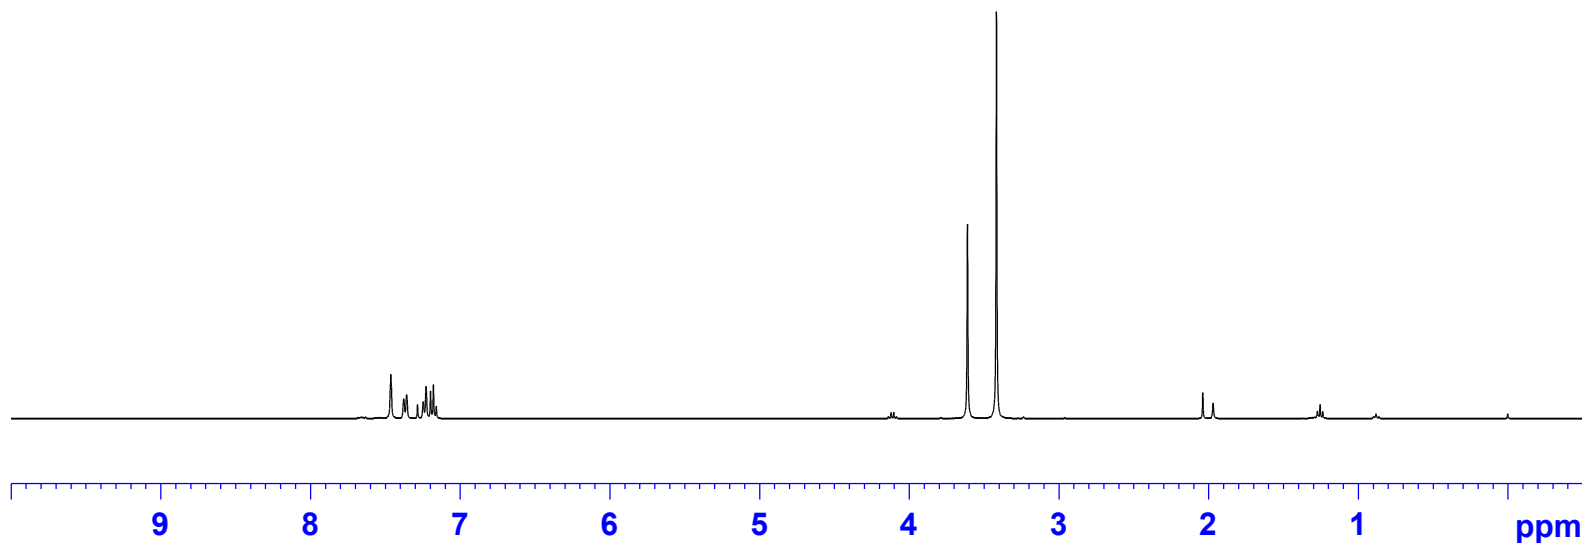

1.06  
0.97  
1.96

3.00  
5.95

S-94

```
NAME      HNMR-gwg-8-148-2
EXPNO     1
PROCNO    1
Date_     20200903
Time      22.08
INSTRUM   spect
PROBHD    5 mm PABBO BB/
PULPROG   zg30
TD        65536
SOLVENT   CDCl3
NS        2
DS        0
SWH       8012.820 Hz
FIDRES    0.122266 Hz
AQ        4.0894966 sec
RG        34.77
DW        62.400 usec
DE        6.50 usec
TE        297.3 K
D1        1.00000000 sec
TD0       1
```

```
===== CHANNEL f1 =====
SFO1     400.1324710 MHz
NUC1     1H
P1       14.50 usec
SI       65536
SF       400.1300000 MHz
WDW      EM
SSB      0
LB       0.30 Hz
GB       0
PC       1.00
```



NAME CNMR-gwg-8-148-2  
EXPNO 1  
PROCNO 1  
Date\_ 20200903  
Time\_ 22.10  
INSTRUM spect  
PROBHD 5 mm PABBO BB/  
PULPROG zgpg30  
TD 65536  
SOLVENT CDCl3  
NS 11  
DS 0  
SWH 24038.461 Hz  
FIDRES 0.366798 Hz  
AQ 1.3631988 sec  
RG 196.92  
DW 20.800 usec  
DE 6.50 usec  
TE 297.7 K  
D1 2.00000000 sec  
D11 0.03000000 sec  
TD0 1

===== CHANNEL f1 =====  
SF01 100.6228298 MHz  
NUC1 13C  
P1 9.70 usec  
SI 32768  
SF 100.6127690 MHz  
WDW EM  
SSB 0  
LB 1.00 Hz  
GB 0  
PC 1.40

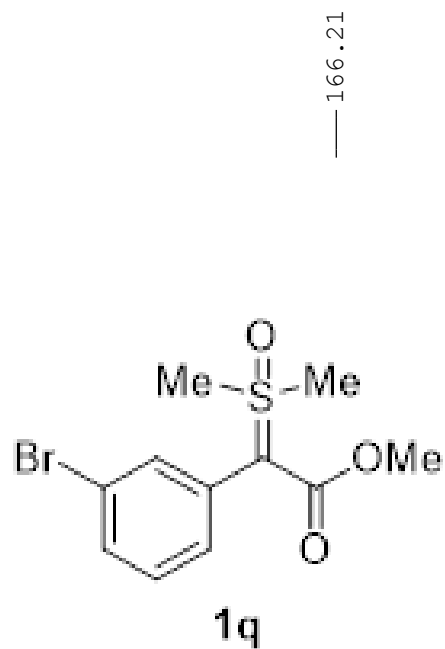

— 166.21

136.21  
134.54  
132.01  
129.89  
129.66  
122.02

— 69.16

— 50.54

— 43.24

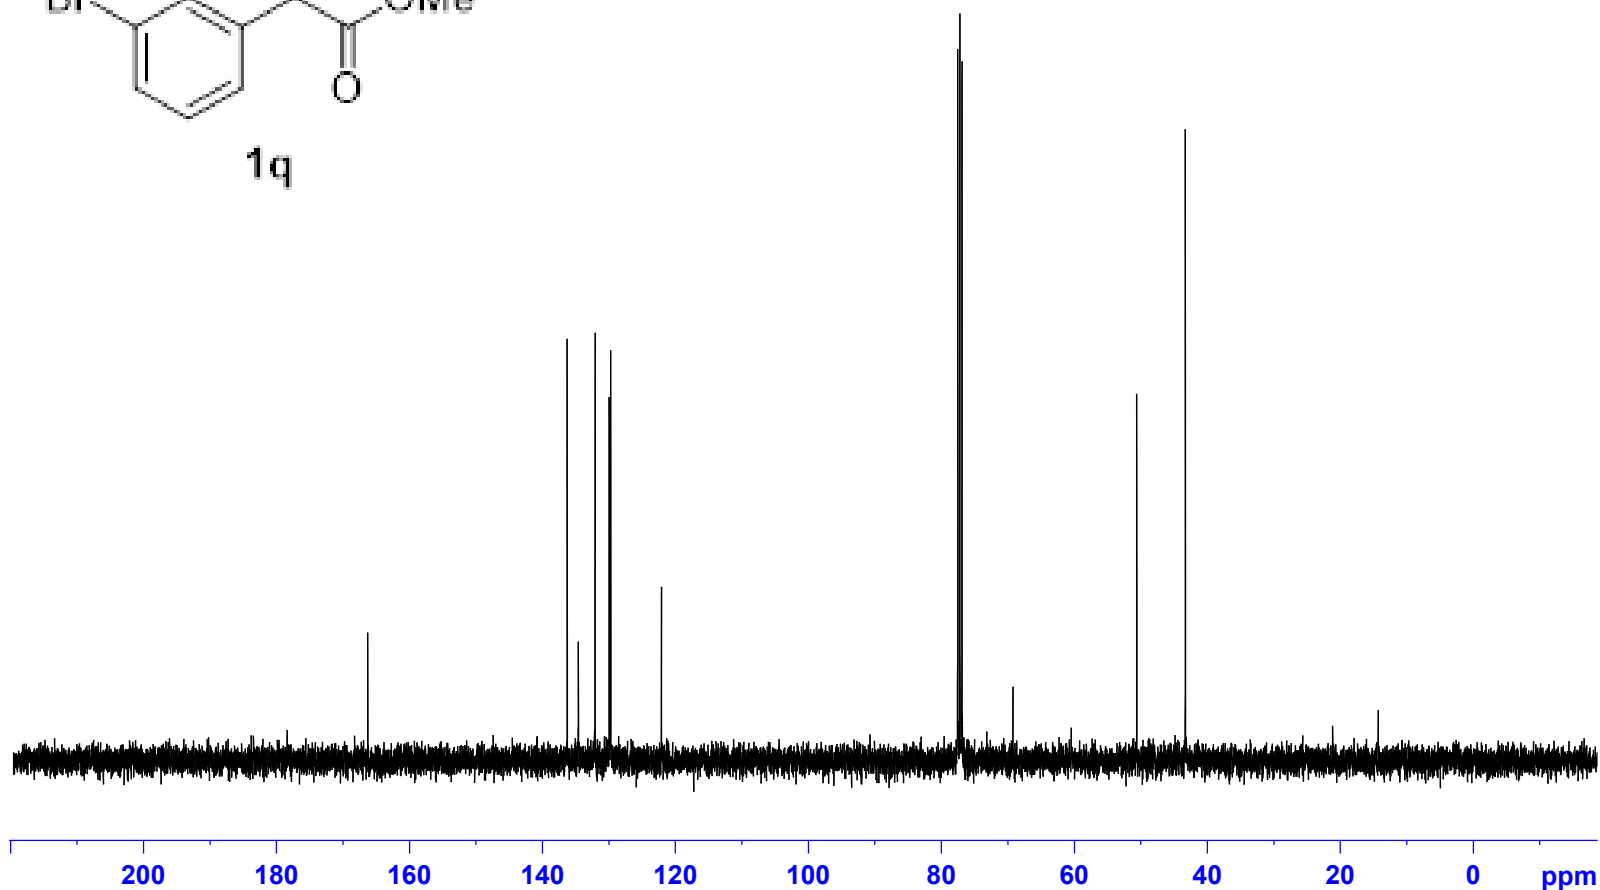

S-95

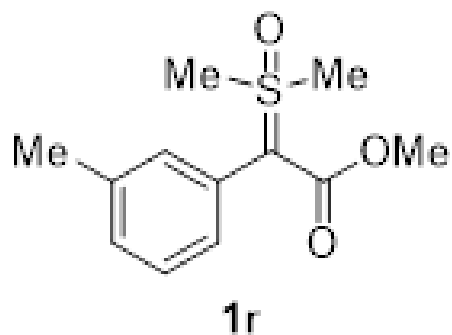

7.28  
7.22  
7.21  
7.19  
7.12  
7.09  
7.08  
7.06

3.59  
3.35

2.33

NAME HNMR-gwg-9-11-1  
EXPNO 1  
PROCNO 1  
Date\_ 20200925  
Time\_ 17.20  
INSTRUM spect  
PROBHD 5 mm PABBO BB/  
PULPROG zg30  
TD 65536  
SOLVENT CDCl3  
NS 2  
DS 0  
SWH 8012.820 Hz  
FIDRES 0.122266 Hz  
AQ 4.0894966 sec  
RG 22.47  
DW 62.400 usec  
DE 6.50 usec  
TE 296.5 K  
D1 1.00000000 sec  
TD0 1

==== CHANNEL f1 =====  
SFO1 400.1324710 MHz  
NUC1 1H  
P1 14.50 usec  
SI 65536  
SF 400.1300000 MHz  
WDW EM  
SSB 0  
LB 0.30 Hz  
GB 0  
PC 1.00

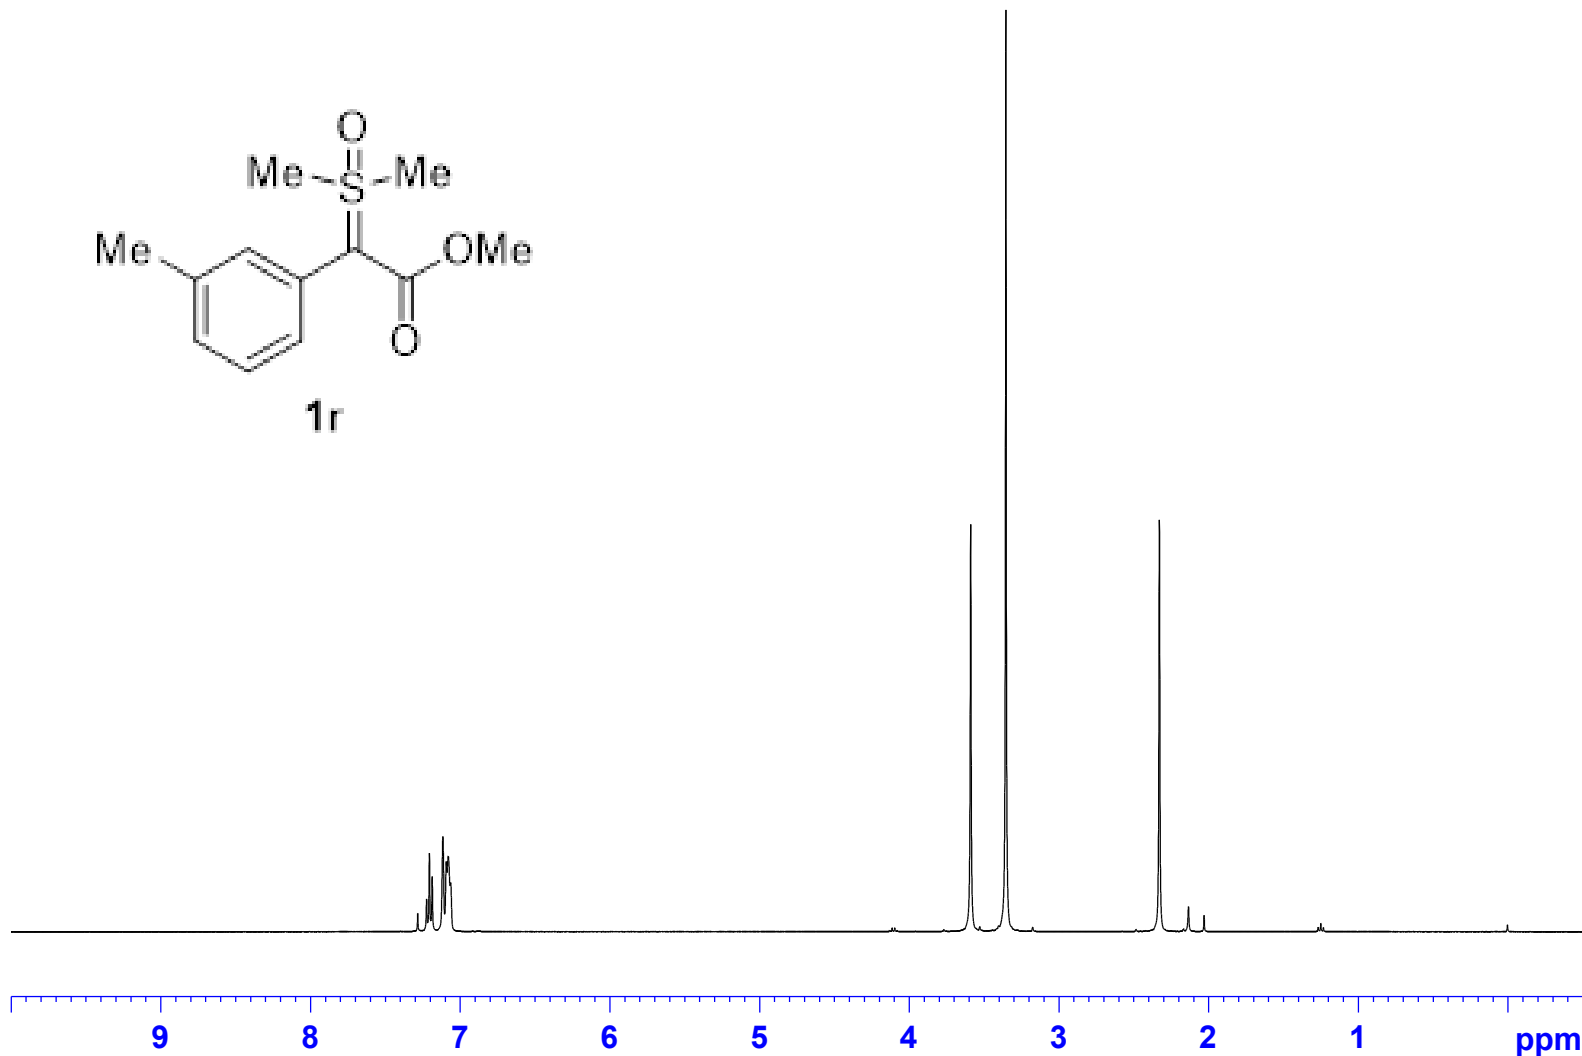

1.01  
2.91

3.00  
6.00  
S-96

2.98





NAME CNMR-gwg-9-11-1  
EXPNO 1  
PROCNO 1  
Date\_ 20200925  
Time\_ 17.22  
INSTRUM spect  
PROBHD 5 mm PABBO BB/  
PULPROG zgpg30  
TD 65536  
SOLVENT CDCl3  
NS 7  
DS 0  
SWH 24038.461 Hz  
FIDRES 0.366798 Hz  
AQ 1.3631988 sec  
RG 196.92  
DW 20.800 usec  
DE 6.50 usec  
TE 296.5 K  
D1 2.00000000 sec  
D11 0.03000000 sec  
TD0 1

==== CHANNEL f1 =====  
SF01 100.6228298 MHz  
NUC1 13C  
P1 9.70 usec  
SI 32768  
SF 100.6127690 MHz  
WDW EM  
SSB 0  
LB 1.00 Hz  
GB 0  
PC 1.40

— 166.70

138.04  
134.50  
132.40  
130.83  
128.35  
128.17

— 70.66

— 50.44

— 42.87

— 21.38

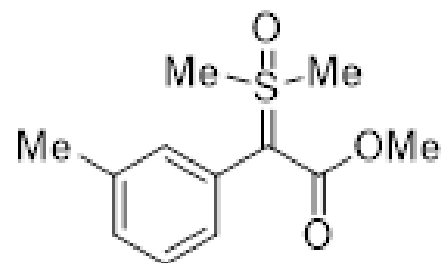

1r

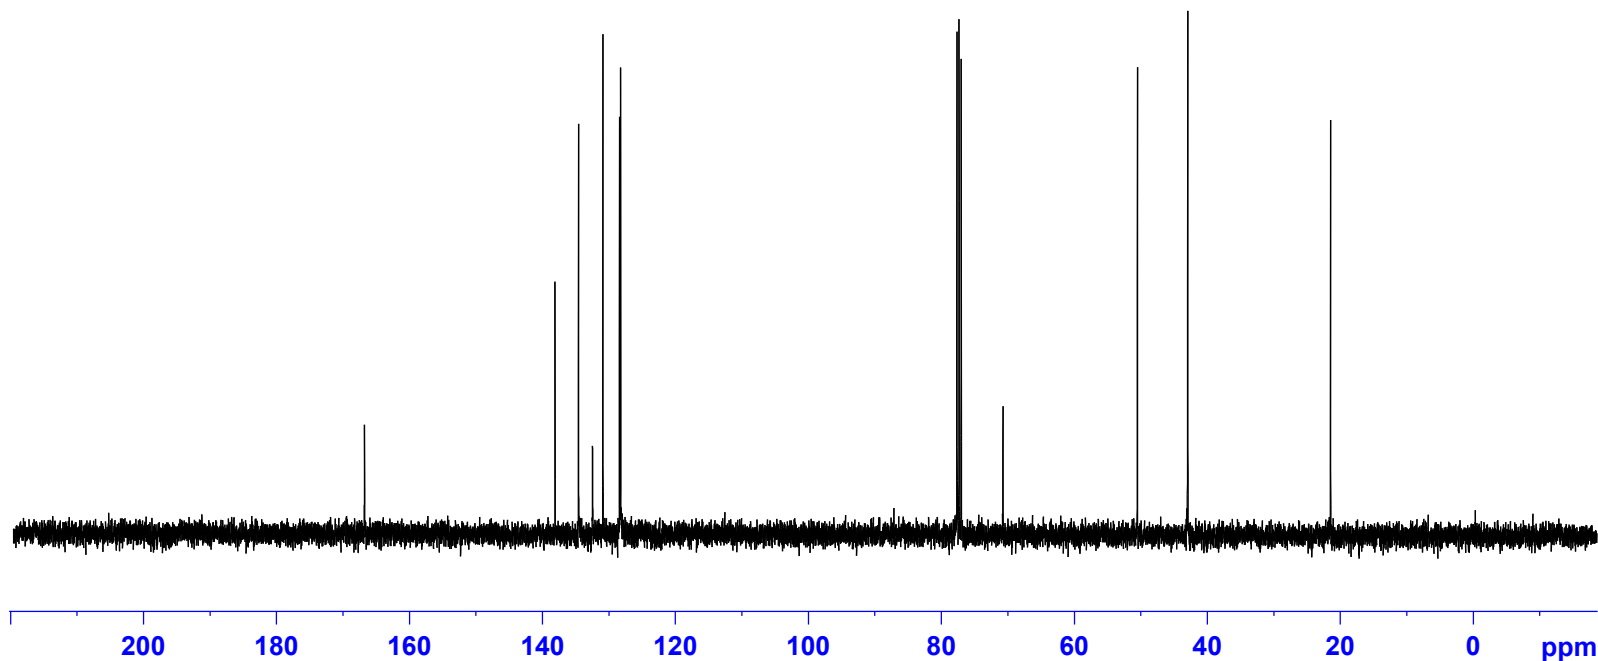

7.42  
7.42  
7.40  
7.40  
7.38  
7.38  
7.33  
7.32  
7.31  
7.31  
7.30  
7.29  
7.28  
7.27  
7.27  
7.26  
7.16  
7.16  
7.14  
7.14  
7.12  
7.10  
7.09  
7.07  
7.07  
5.14

3.46  
3.43

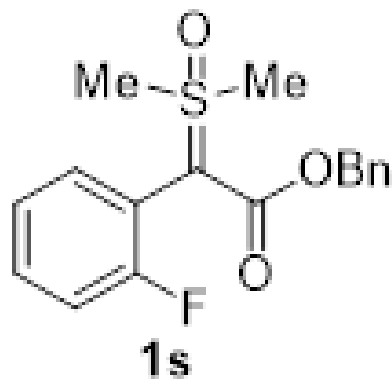

```

NAME      HNMR-gwg-8-183-2
EXPNO     1
PROCNO    1
Date_     20200915
Time      15.51
INSTRUM   spect
PROBHD    5 mm PABBO BB/
PULPROG   zg30
TD        65536
SOLVENT   CDCl3
NS        2
DS        0
SWH       8012.820 Hz
FIDRES    0.122266 Hz
AQ        4.0894966 sec
RG        70.97
DW        62.400 usec
DE        6.50 usec
TE        296.8 K
D1        1.00000000 sec
TD0       1
  
```

```

===== CHANNEL f1 =====
SFO1     400.1324710 MHz
NUC1     1H
P1       14.50 usec
SI       65536
SF       400.1300000 MHz
WDW      EM
SSB      0
LB       0.30 Hz
GB       0
PC       1.00
  
```

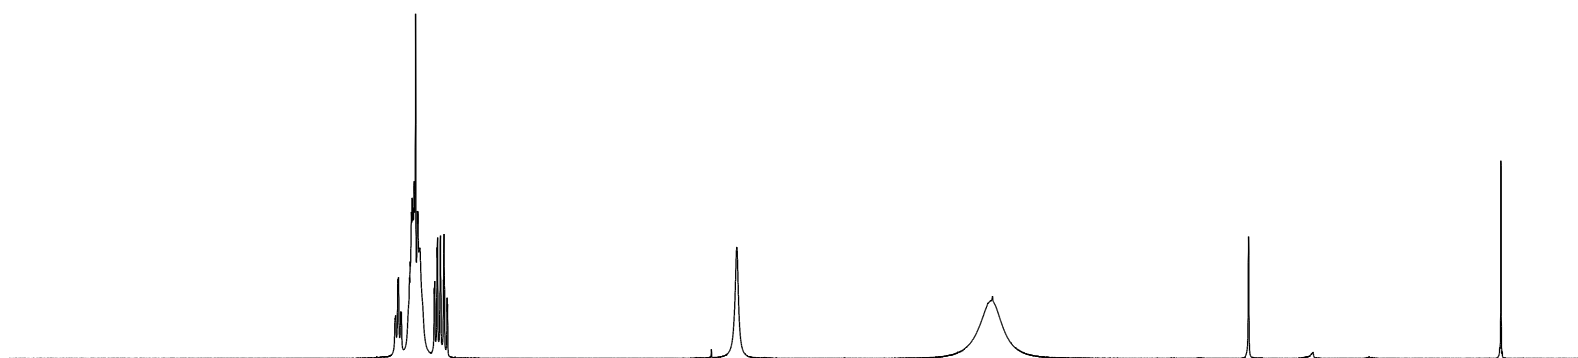

9 8 7 6 5 4 3 2 1 ppm

7.30  
2.18

2.00

6.22

S-98

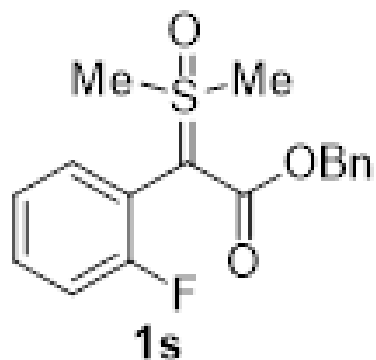

165.84  
163.45  
161.03  
137.75  
136.97  
136.96  
129.66  
129.57  
128.27  
127.31  
126.96  
124.03  
115.55  
115.32

77.28

64.38

42.80

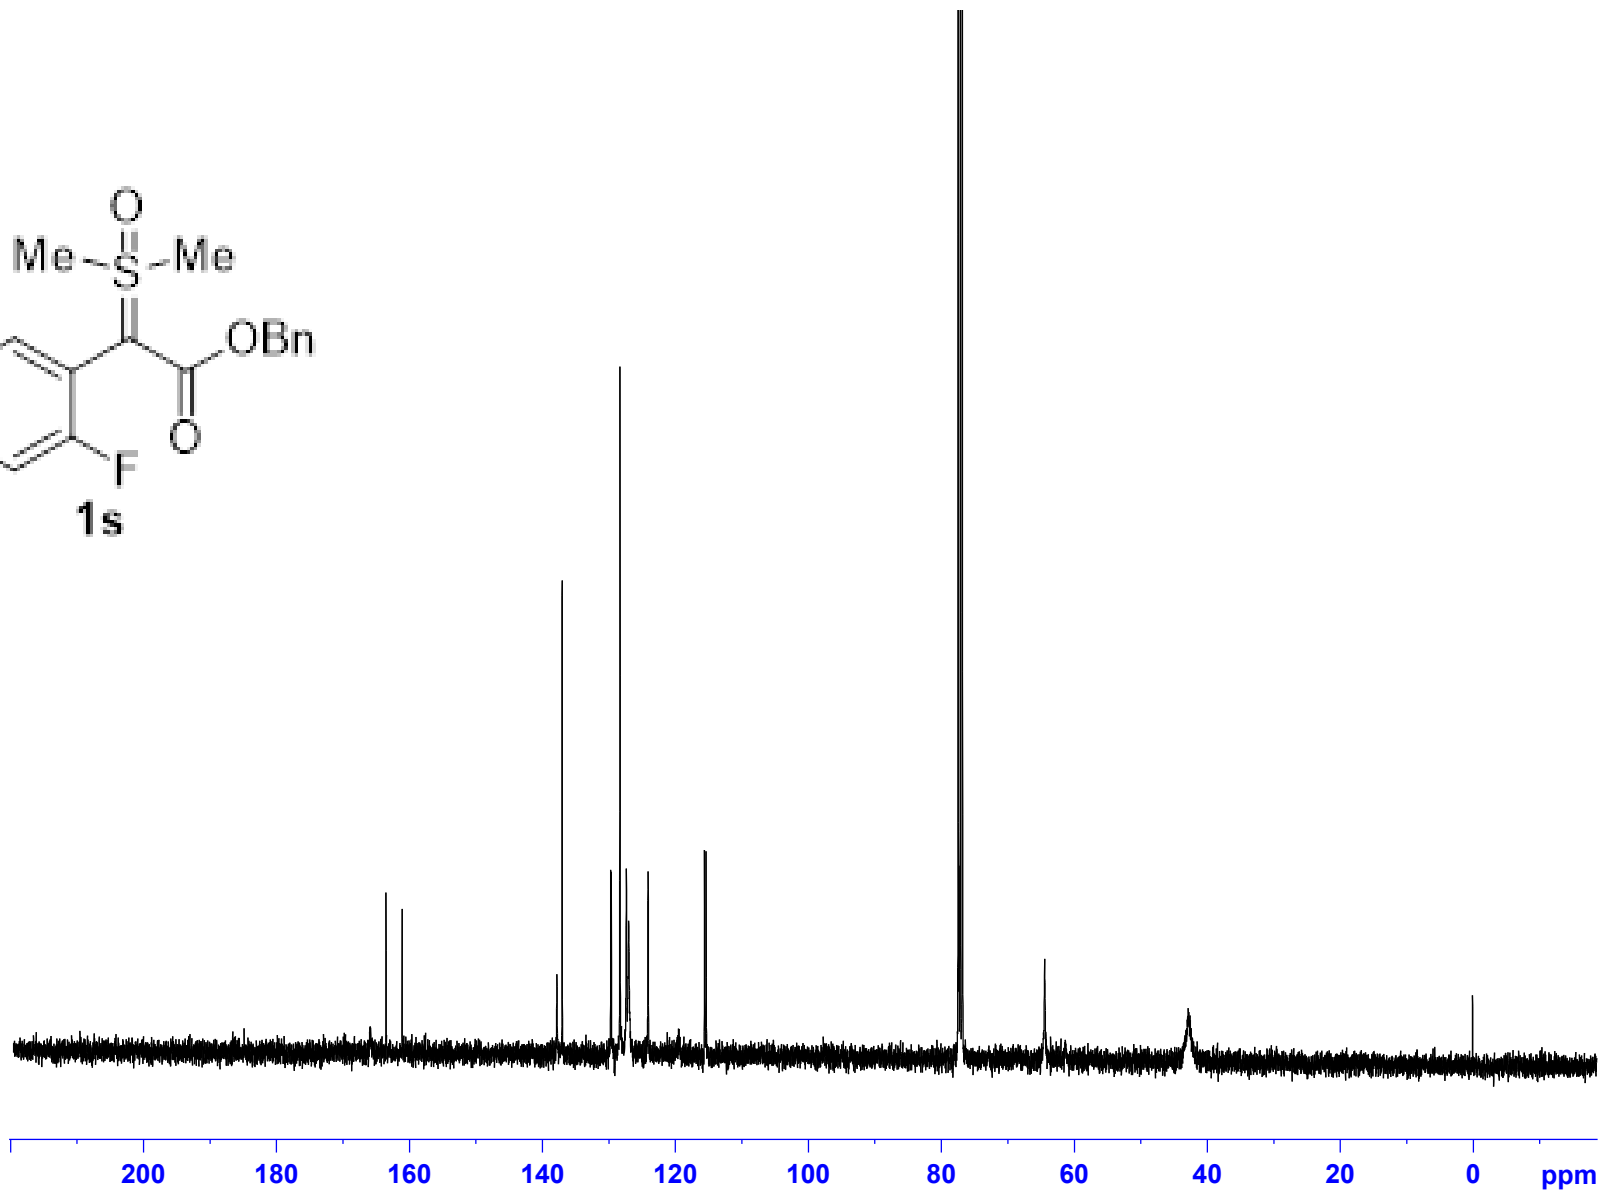

S-99

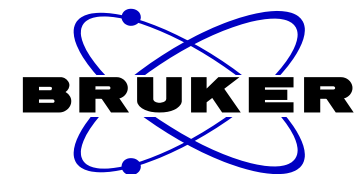

NAME CNMR-gwg-8-183-2  
EXPNO 1  
PROCNO 1  
Date\_ 20200915  
Time\_ 15.58  
INSTRUM spect  
PROBHD 5 mm PABBO BB/  
PULPROG zgpg30  
TD 65536  
SOLVENT CDCl3  
NS 400  
DS 0  
SWH 24038.461 Hz  
FIDRES 0.366798 Hz  
AQ 1.3631988 sec  
RG 196.92  
DW 20.800 usec  
DE 6.50 usec  
TE 297.8 K  
D1 2.00000000 sec  
D11 0.03000000 sec  
TD0 1

==== CHANNEL f1 =====  
SF01 100.6228298 MHz  
NUC1 13C  
P1 9.70 usec  
SI 32768  
SF 100.6127690 MHz  
WDW EM  
SSB 0  
LB 1.00 Hz  
GB 0  
PC 1.40



NAME FNMR-gwg-8-183-2  
EXPNO 1  
PROCNO 1  
Date\_ 20200915  
Time\_ 16.20  
INSTRUM spect  
PROBHD 5 mm PABBO BB/  
PULPROG zgflqn  
TD 131072  
SOLVENT CDCl3  
NS 4  
DS 0  
SWH 89285.711 Hz  
FIDRES 0.681196 Hz  
AQ 0.7340532 sec  
RG 196.92  
DW 5.600 usec  
DE 6.50 usec  
TE 297.1 K  
D1 1.00000000 sec  
TD0 1

==== CHANNEL f1 =====  
SFO1 376.4607164 MHz  
NUC1 19F  
P1 14.70 usec  
SI 65536  
SF 376.4983660 MHz  
WDW EM  
SSB 0  
LB 0.30 Hz  
GB 0  
PC 1.00

— -110.56

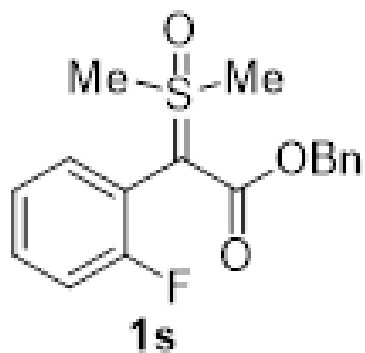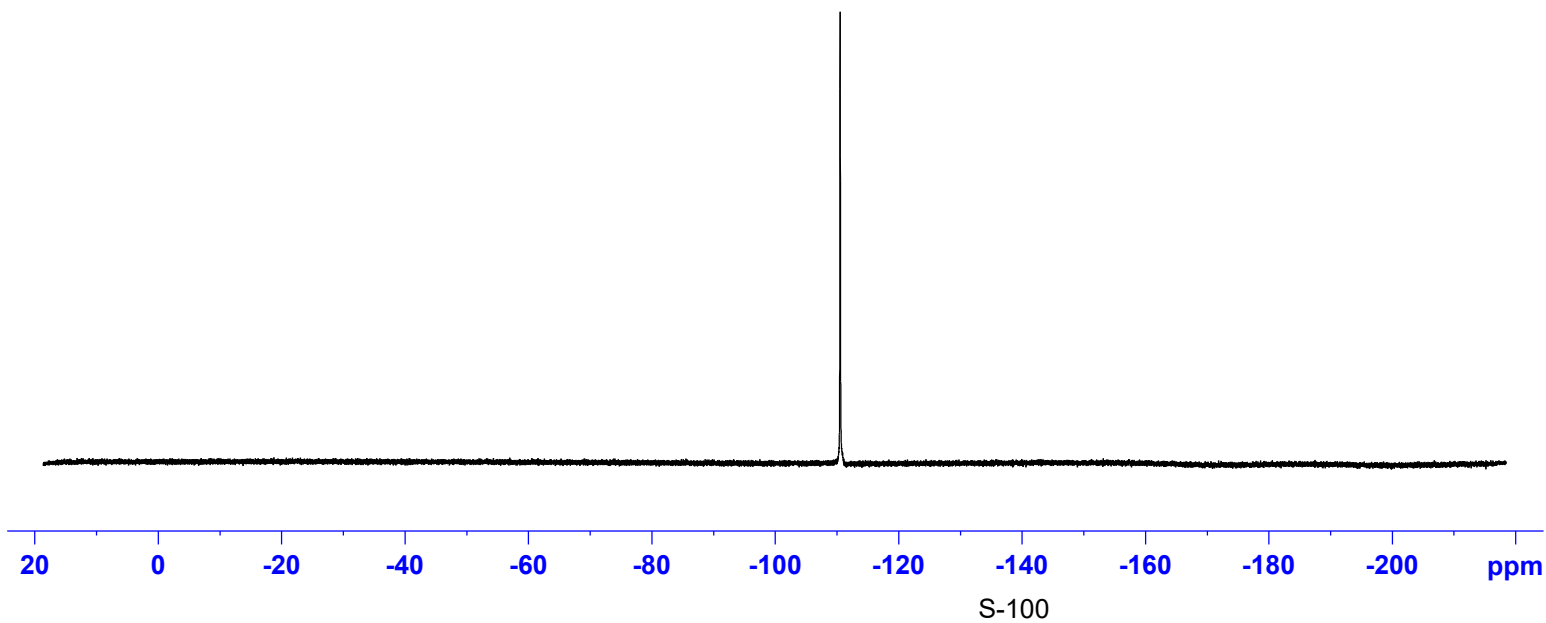

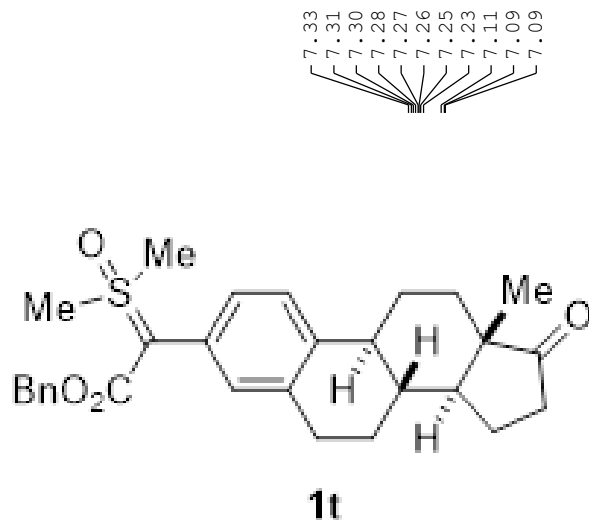

7.33  
7.31  
7.30  
7.28  
7.27  
7.26  
7.25  
7.23  
7.11  
7.09

5.26  
5.14

3.39  
3.37  
2.91  
2.90  
2.89  
2.54  
2.52  
2.50  
2.47  
2.44  
2.40  
2.30  
2.17  
2.15  
2.12  
2.10  
2.09  
2.07  
2.06  
2.04  
2.02  
1.98  
1.95  
1.67  
1.64  
1.62  
1.59  
1.58  
1.57  
1.56  
1.54  
1.52  
1.48  
1.45

NAME HNMR-gwg-9-91-1  
EXPNO 1  
PROCNO 1  
Date\_ 20201117  
Time\_ 15.10  
INSTRUM spect  
PROBHD 5 mm PABBO BB/  
PULPROG zg30  
TD 65536  
SOLVENT CDCl3  
NS 3  
DS 0  
SWH 8012.820 Hz  
FIDRES 0.122266 Hz  
AQ 4.0894966 sec  
RG 22.47  
DW 62.400 usec  
DE 6.50 usec  
TE 296.7 K  
D1 1.00000000 sec  
TD0 1

===== CHANNEL f1 =====  
SFO1 400.1324710 MHz  
NUC1 1H  
P1 14.50 usec  
SI 65536  
SF 400.1300000 MHz  
WDW EM  
SSB 0  
LB 0.30 Hz  
GB 0  
PC 1.00

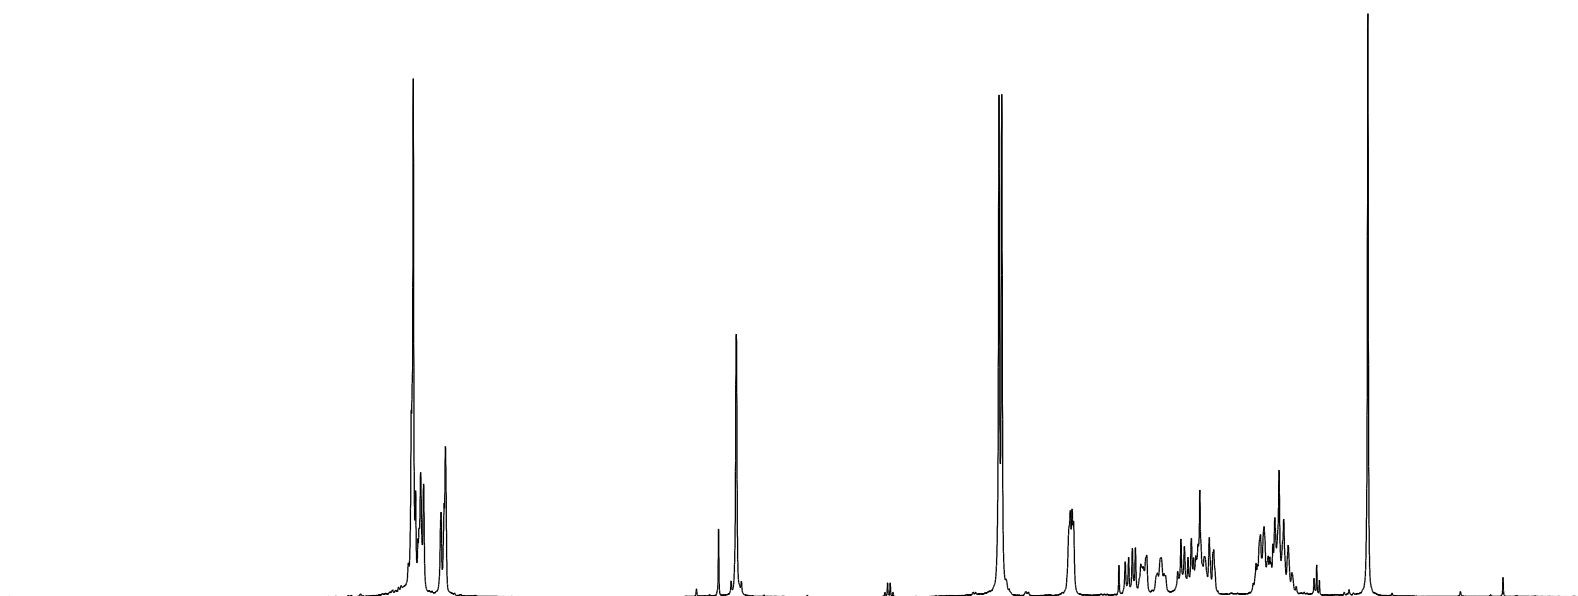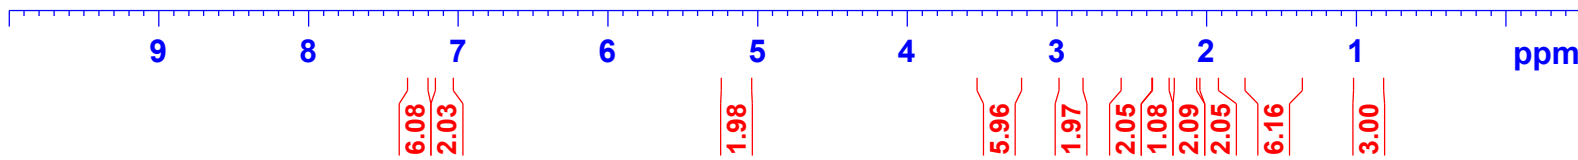

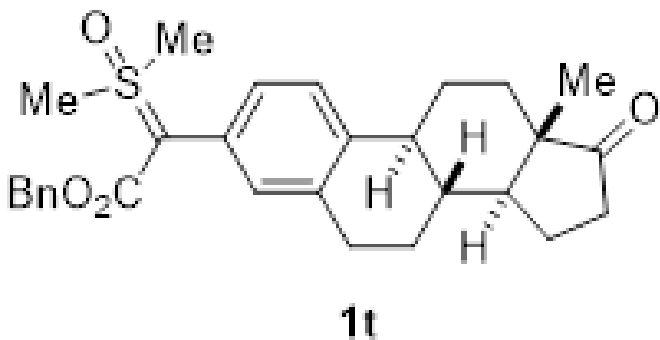

— 165.87  
 — 138.65  
 — 137.95  
 — 136.41  
 — 134.18  
 — 131.03  
 — 129.65  
 — 128.30  
 — 127.36  
 — 127.28  
 — 125.38

— 70.27  
 — 64.32  
 — 50.53  
 — 48.01  
 — 44.39  
 — 43.13  
 — 43.09  
 — 38.04  
 — 35.90  
 — 31.63  
 — 29.33  
 — 26.55  
 — 25.59  
 — 21.61  
 — 13.91

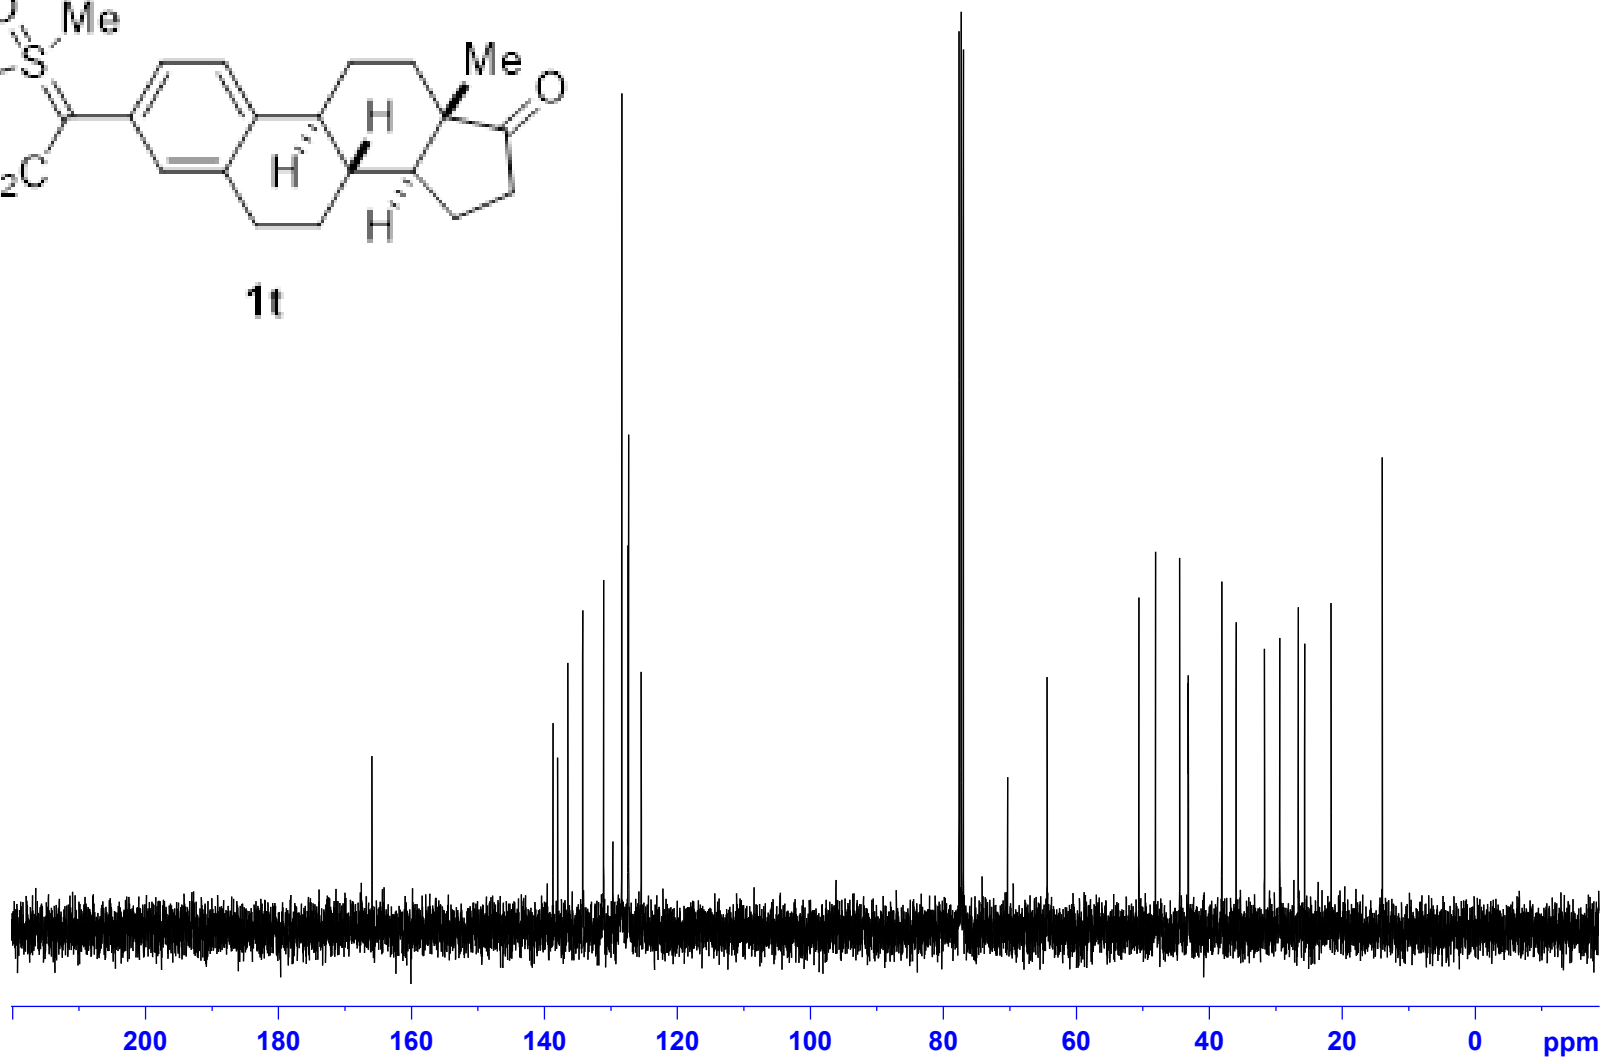

NAME CNMR-gwg-9-91-1  
 EXPNO 1  
 PROCNO 1  
 Date\_ 20201117  
 Time\_ 15.21  
 INSTRUM spect  
 PROBHD 5 mm PABBO BB/  
 PULPROG zgpg30  
 TD 65536  
 SOLVENT CDCl3  
 NS 6  
 DS 0  
 SWH 28409.092 Hz  
 FIDRES 0.433488 Hz  
 AQ 1.1534836 sec  
 RG 196.92  
 DW 17.600 usec  
 DE 6.50 usec  
 TE 297.1 K  
 D1 2.00000000 sec  
 D11 0.03000000 sec  
 TD0 1

==== CHANNEL f1 =====  
 SFO1 100.6228298 MHz  
 NUC1 13C  
 P1 9.70 usec  
 SI 32768  
 SF 100.6127690 MHz  
 WDW EM  
 SSB 0  
 LB 1.00 Hz  
 GB 0  
 PC 1.40

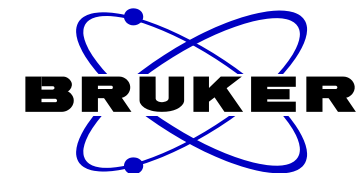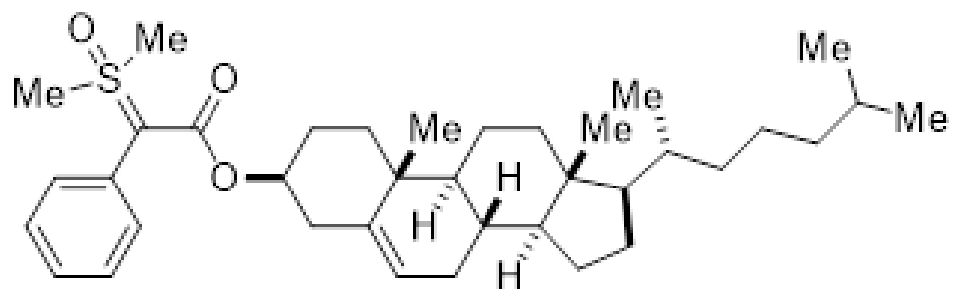

1u

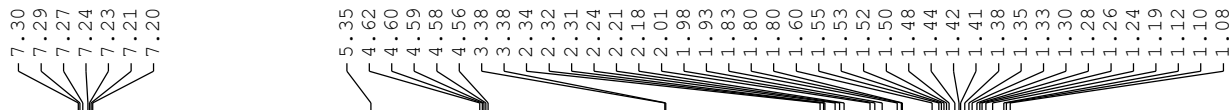

```
NAME      HNMR-gwg-8-189-reactant
EXPNO     1
PROCNO    1
Date_     20200916
Time_     21.10
INSTRUM   spect
PROBHD    5 mm PABBO BB-
PULPROG   zg30
TD        65536
SOLVENT   CDC13
NS        4
DS        0
SWH       8223.685 Hz
FIDRES    0.125483 Hz
AQ        3.9846387 sec
RG        36
DW        60.800 usec
DE        6.00 usec
TE        294.5 K
D1        1.00000000 sec
TD0       1
```

```
===== CHANNEL f1 =====
NUC1      1H
P1        15.80 usec
PL1       -1.00 dB
PL1W      12.17476940 W
SF01      400.1324710 MHz
SI        32768
SF        400.1300054 MHz
WDW       EM
SSB       0
LB        0.30 Hz
GB        0
PC        1.00
```

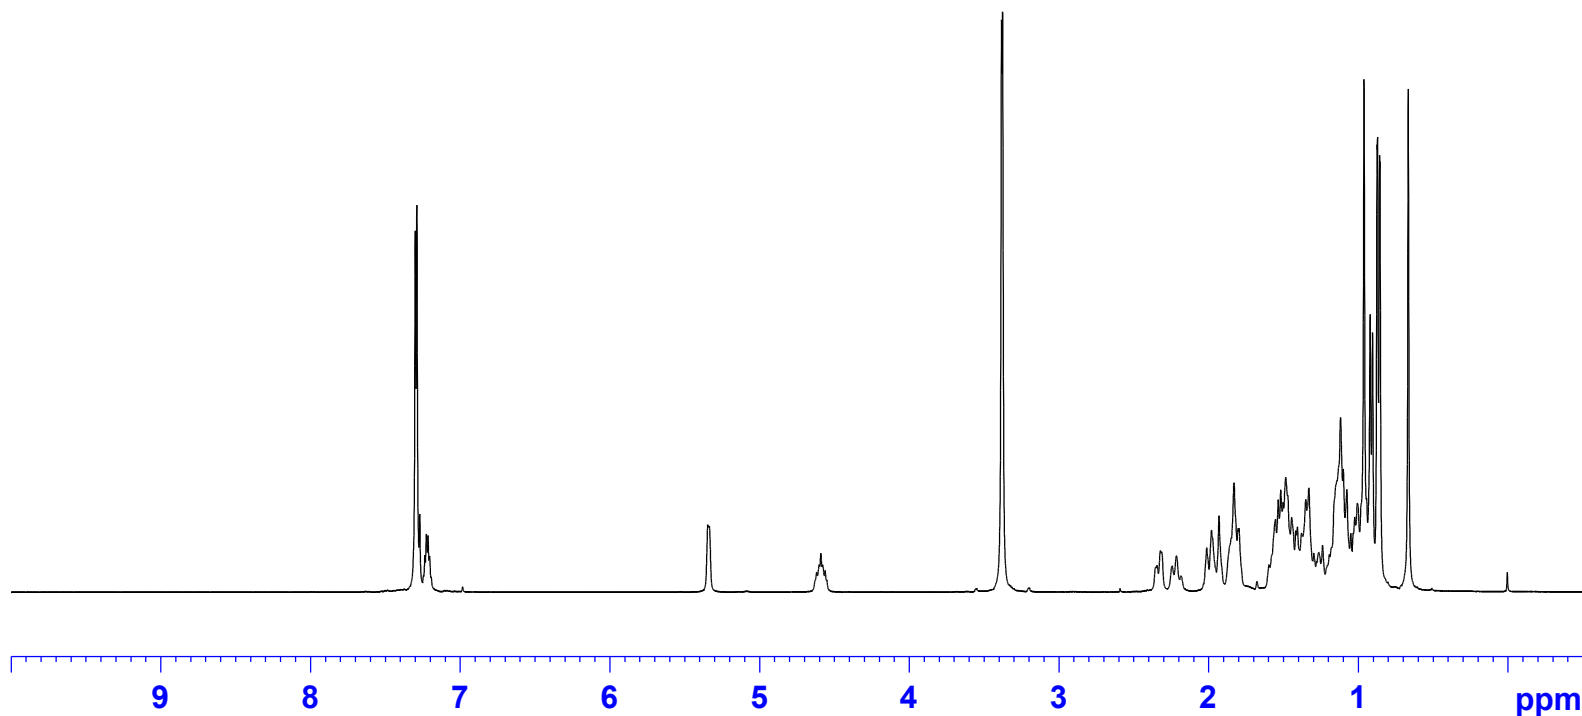



7.53  
7.52  
7.51  
7.41  
7.40  
7.39  
7.38  
7.37  
7.36  
7.35  
7.34  
7.33  
6.76  
6.75  
6.74  
6.59  
6.58  
6.57  
6.57

5.05

3.75  
3.73

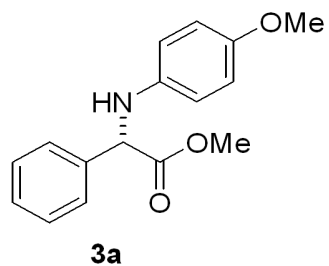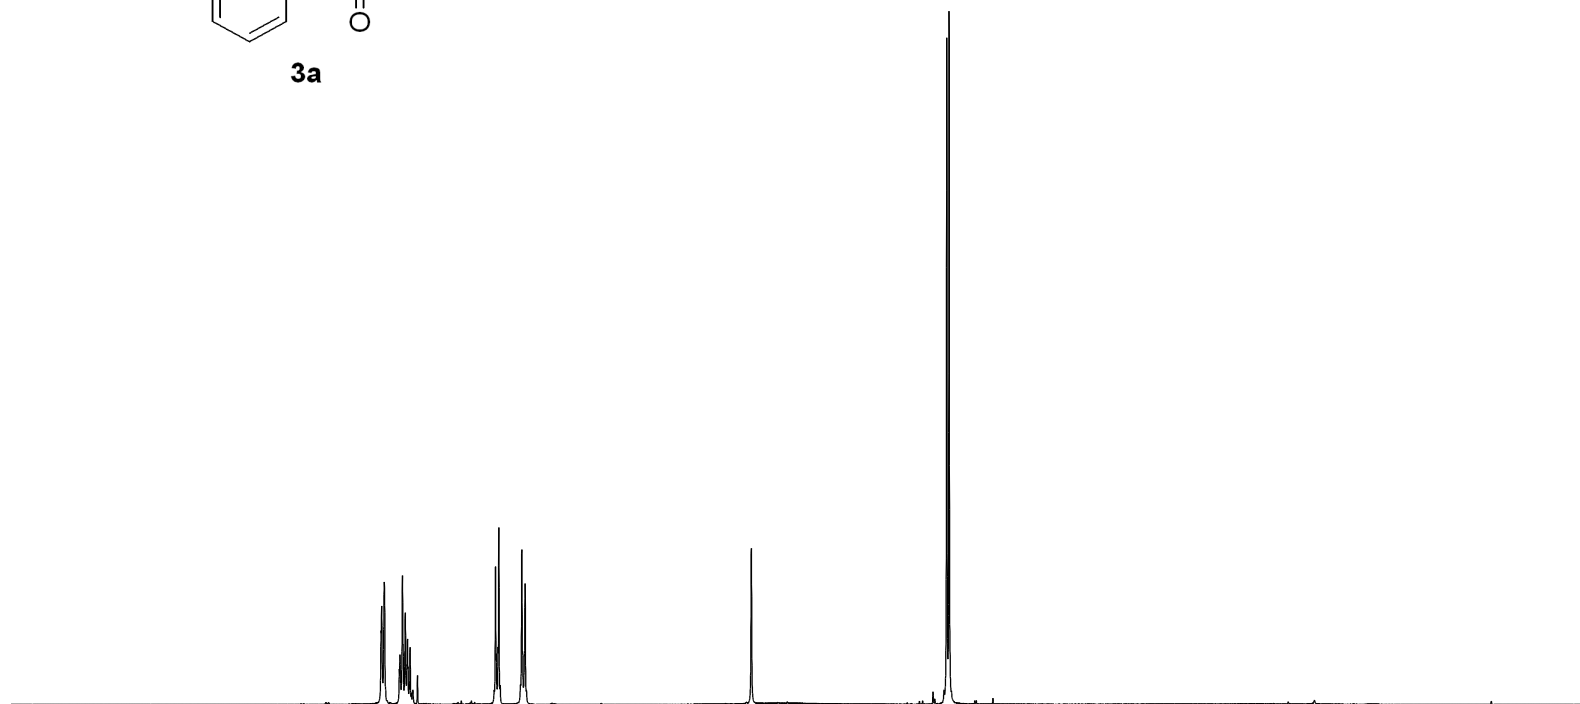

NAME HNMR-gwg-8-84-1  
EXPNO 1  
PROCNO 1  
Date\_ 20200812  
Time\_ 17.05  
INSTRUM spect  
PROBHD 5 mm PABBO BB/  
PULPROG zg30  
TD 65536  
SOLVENT CDCl3  
NS 2  
DS 0  
SWH 8012.820 Hz  
FIDRES 0.122266 Hz  
AQ 4.0894966 sec  
RG 88.84  
DW 62.400 usec  
DE 6.50 usec  
TE 296.6 K  
D1 1.00000000 sec  
TD0 1

==== CHANNEL f1 =====  
SFO1 400.1324710 MHz  
NUC1 1H  
P1 14.50 usec  
SI 65536  
SF 400.1300000 MHz  
WDW EM  
SSB 0  
LB 0.30 Hz  
GB 0  
PC 1.00

2.12  
2.98

2.00  
2.03

1.13

6.11





NAME CNMR-gwg-8-84-1  
EXPNO 1  
PROCNO 1  
Date\_ 20200812  
Time\_ 17.08  
INSTRUM spect  
PROBHD 5 mm PABBO BB/  
PULPROG zgpg30  
TD 65536  
SOLVENT CDCl3  
NS 18  
DS 0  
SWH 24038.461 Hz  
FIDRES 0.366798 Hz  
AQ 1.3631988 sec  
RG 196.92  
DW 20.800 usec  
DE 6.50 usec  
TE 297.2 K  
D1 2.00000000 sec  
D11 0.03000000 sec  
TD0 1

==== CHANNEL f1 =====  
SF01 100.6228298 MHz  
NUC1 13C  
P1 9.70 usec  
SI 32768  
SF 100.6127690 MHz  
WDW EM  
SSB 0  
LB 1.00 Hz  
GB 0  
PC 1.40

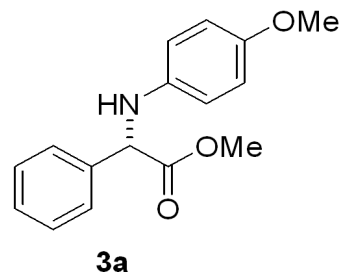

— 172.51  
— 152.62  
— 139.99  
— 137.66  
— 128.88  
— 128.32  
— 127.33  
— 114.93  
— 114.85

— 61.75  
— 55.68  
— 52.75

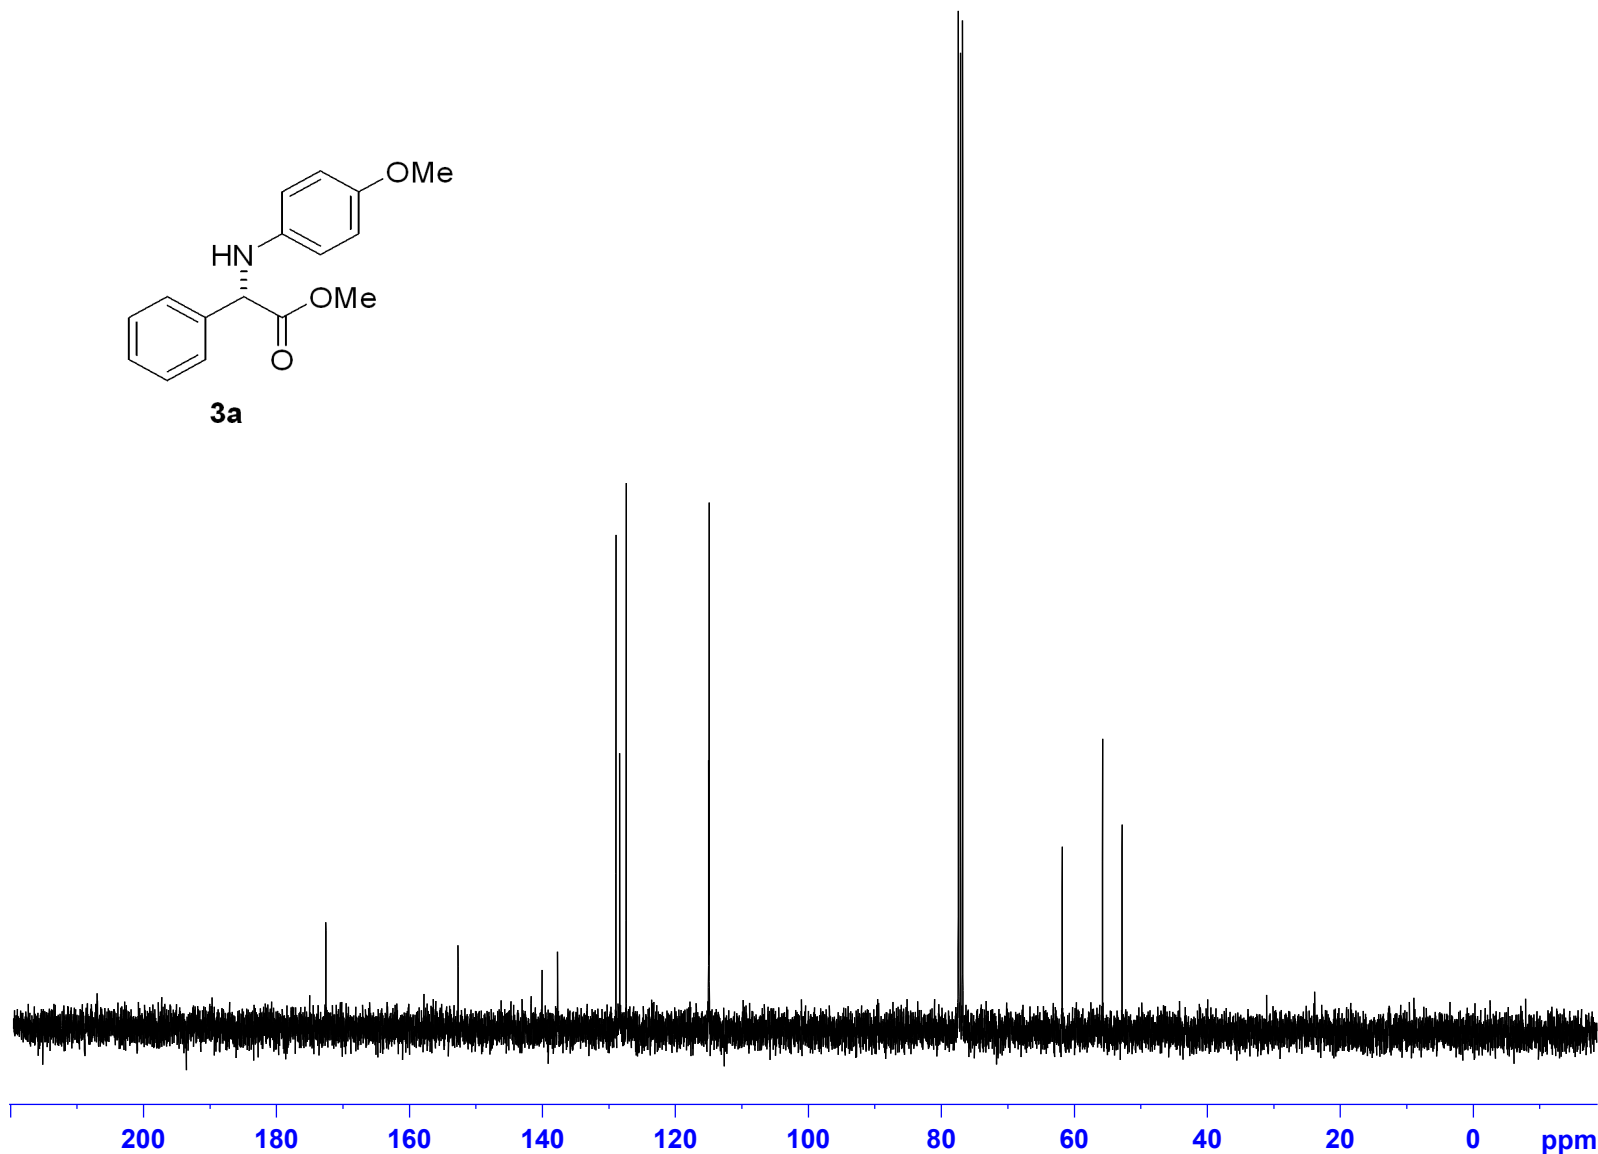

S-105



NAME HNMR-gwg-8-138-1  
EXPNO 1  
PROCNO 1  
Date\_ 20200901  
Time\_ 13.31  
INSTRUM spect  
PROBHD 5 mm PABBO BB/  
PULPROG zg30  
TD 65536  
SOLVENT CD2Cl2  
NS 2  
DS 0  
SWH 8012.820 Hz  
FIDRES 0.122266 Hz  
AQ 4.0894966 sec  
RG 31.55  
DW 62.400 usec  
DE 6.50 usec  
TE 296.9 K  
D1 1.00000000 sec  
TD0 1

==== CHANNEL f1 =====  
SFO1 400.1324710 MHz  
NUC1 1H  
P1 14.50 usec  
SI 65536  
SF 400.1300000 MHz  
WDW EM  
SSB 0  
LB 0.30 Hz  
GB 0  
PC 1.00

7.56  
7.56  
7.54  
7.44  
7.44  
7.43  
7.42  
7.42  
7.40  
7.40  
7.39  
7.38  
7.38  
7.37  
7.37  
7.36  
7.35  
7.35  
7.34  
7.34  
6.78  
6.77  
6.76  
6.75  
6.61  
6.60  
6.59  
6.59  
5.09  
4.78  
4.30  
4.28  
4.28  
4.27  
4.26  
4.25  
4.24  
4.22  
4.20  
4.19  
4.18  
4.17  
4.16  
4.15  
4.14  
4.12  
3.73

1.27  
1.25  
1.23

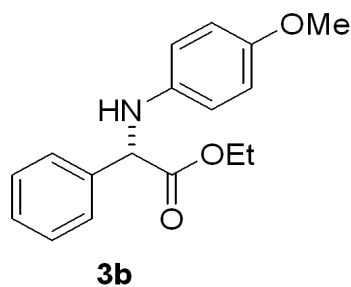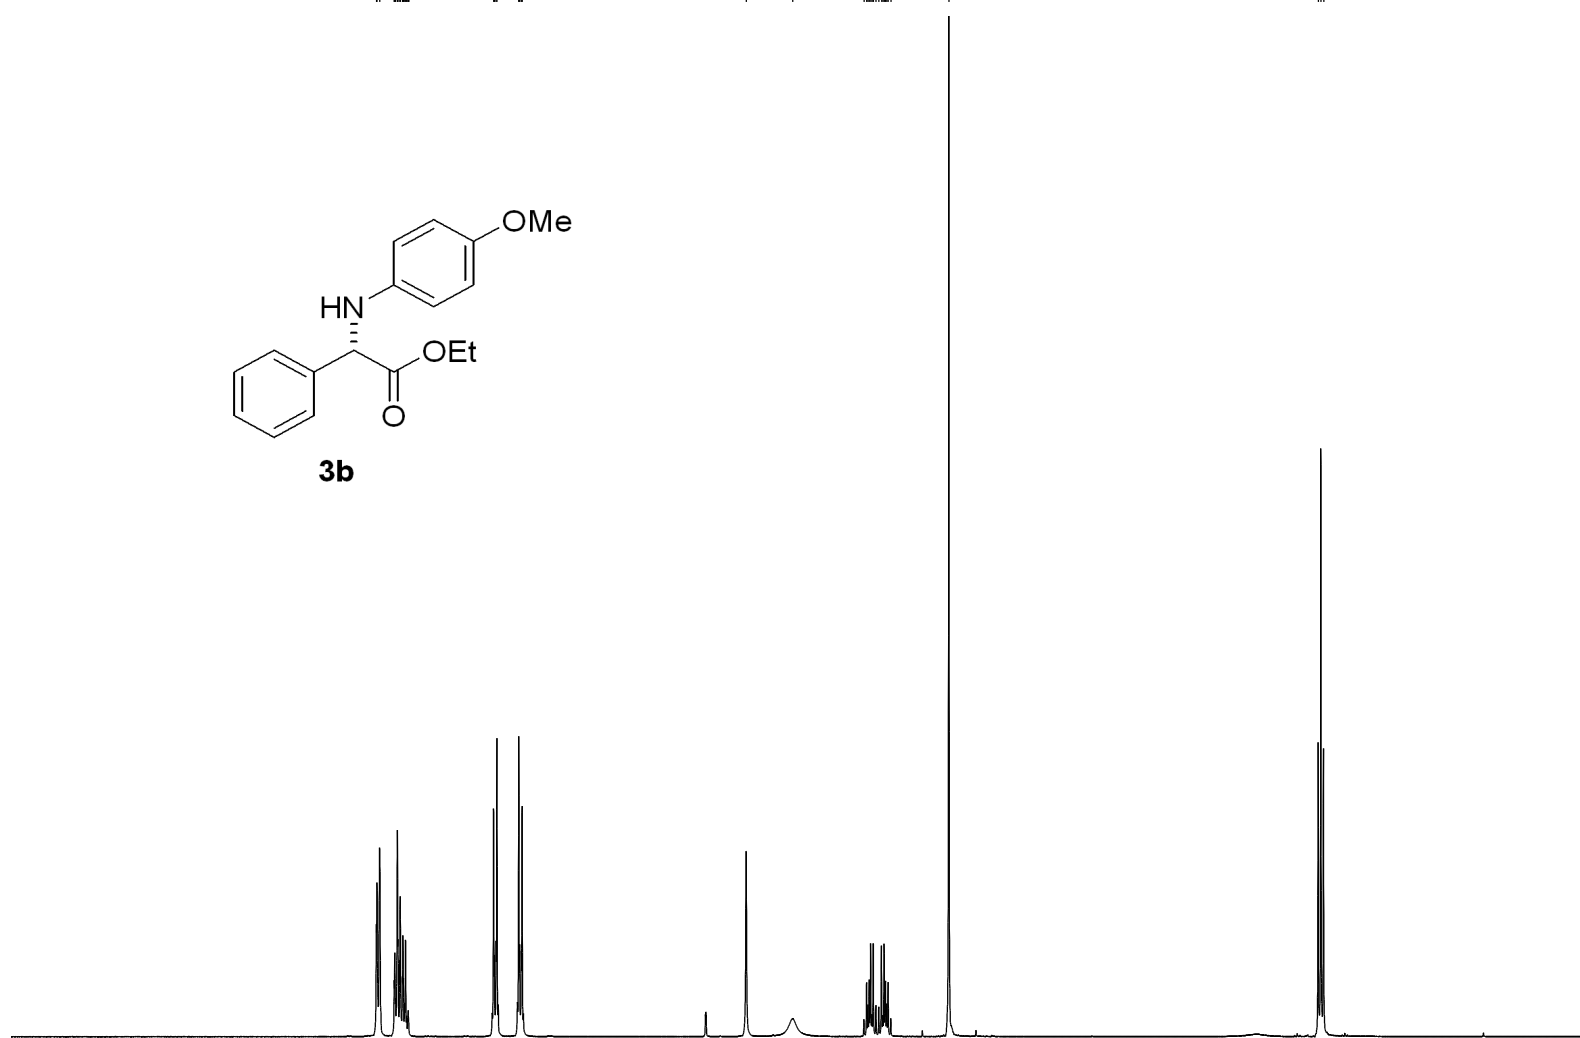

9

8

7

6

5

4

3

2

1

ppm

1.97  
2.96

1.98  
2.02

1.00  
0.89

2.01  
3.00

3.02

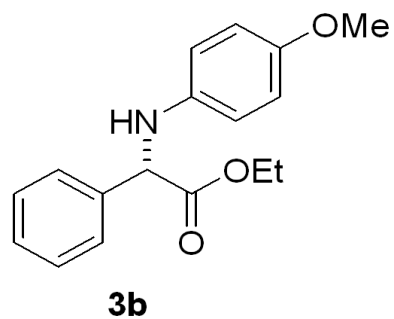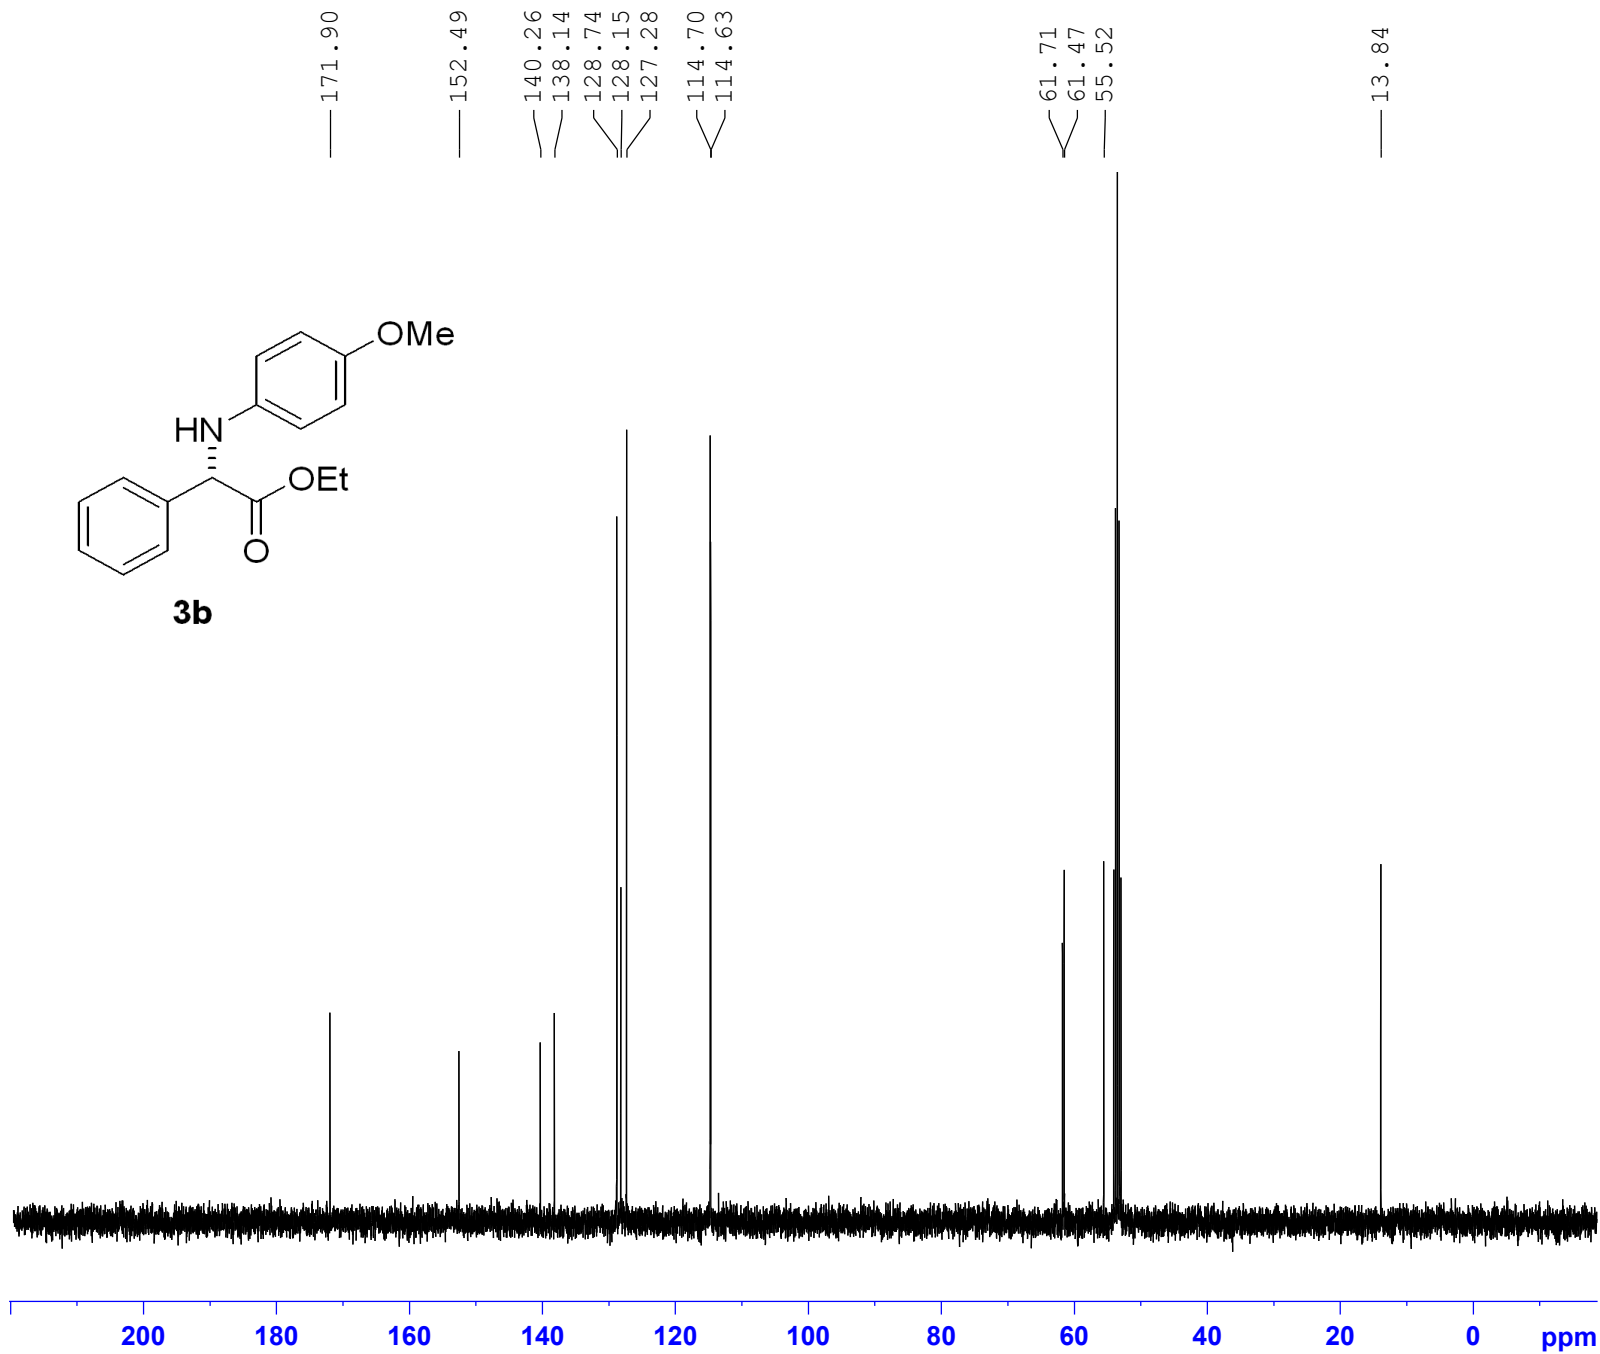

S-107



```

NAME      CNMR-gwg-8-138-1
EXPNO     1
PROCNO    1
Date_     20200901
Time_     13.34
INSTRUM   spect
PROBHD    5 mm PABBO BB/
PULPROG   zgpg30
TD         65536
SOLVENT   CD2C12
NS         10
DS         0
SWH        24038.461 Hz
FIDRES     0.366798 Hz
AQ         1.3631988 sec
RG         196.92
DW         20.800 usec
DE         6.50 usec
TE         297.2 K
D1         2.00000000 sec
D11        0.03000000 sec
TD0        1
  
```

```

===== CHANNEL f1 =====
SF01      100.6228298 MHz
NUC1       13C
P1         9.70 usec
SI         32768
SF         100.6127690 MHz
WDW        EM
SSB        0
LB         1.00 Hz
GB         0
PC         1.40
  
```



NAME HNMR-gwg-8-102-1  
EXPNO 1  
PROCNO 1  
Date\_ 20200819  
Time\_ 19.44  
INSTRUM spect  
PROBHD 5 mm PABBO BB/  
PULPROG zg30  
TD 65536  
SOLVENT CDCl3  
NS 4  
DS 0  
SWH 8012.820 Hz  
FIDRES 0.122266 Hz  
AQ 4.0894966 sec  
RG 70.97  
DW 62.400 usec  
DE 6.50 usec  
TE 296.6 K  
D1 1.00000000 sec  
TD0 1

==== CHANNEL f1 =====  
SFO1 400.1324710 MHz  
NUC1 1H  
P1 14.50 usec  
SI 65536  
SF 400.1300000 MHz  
WDW EM  
SSB 0  
LB 0.30 Hz  
GB 0  
PC 1.00

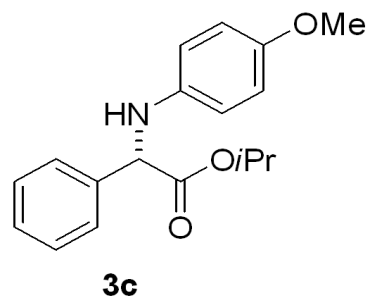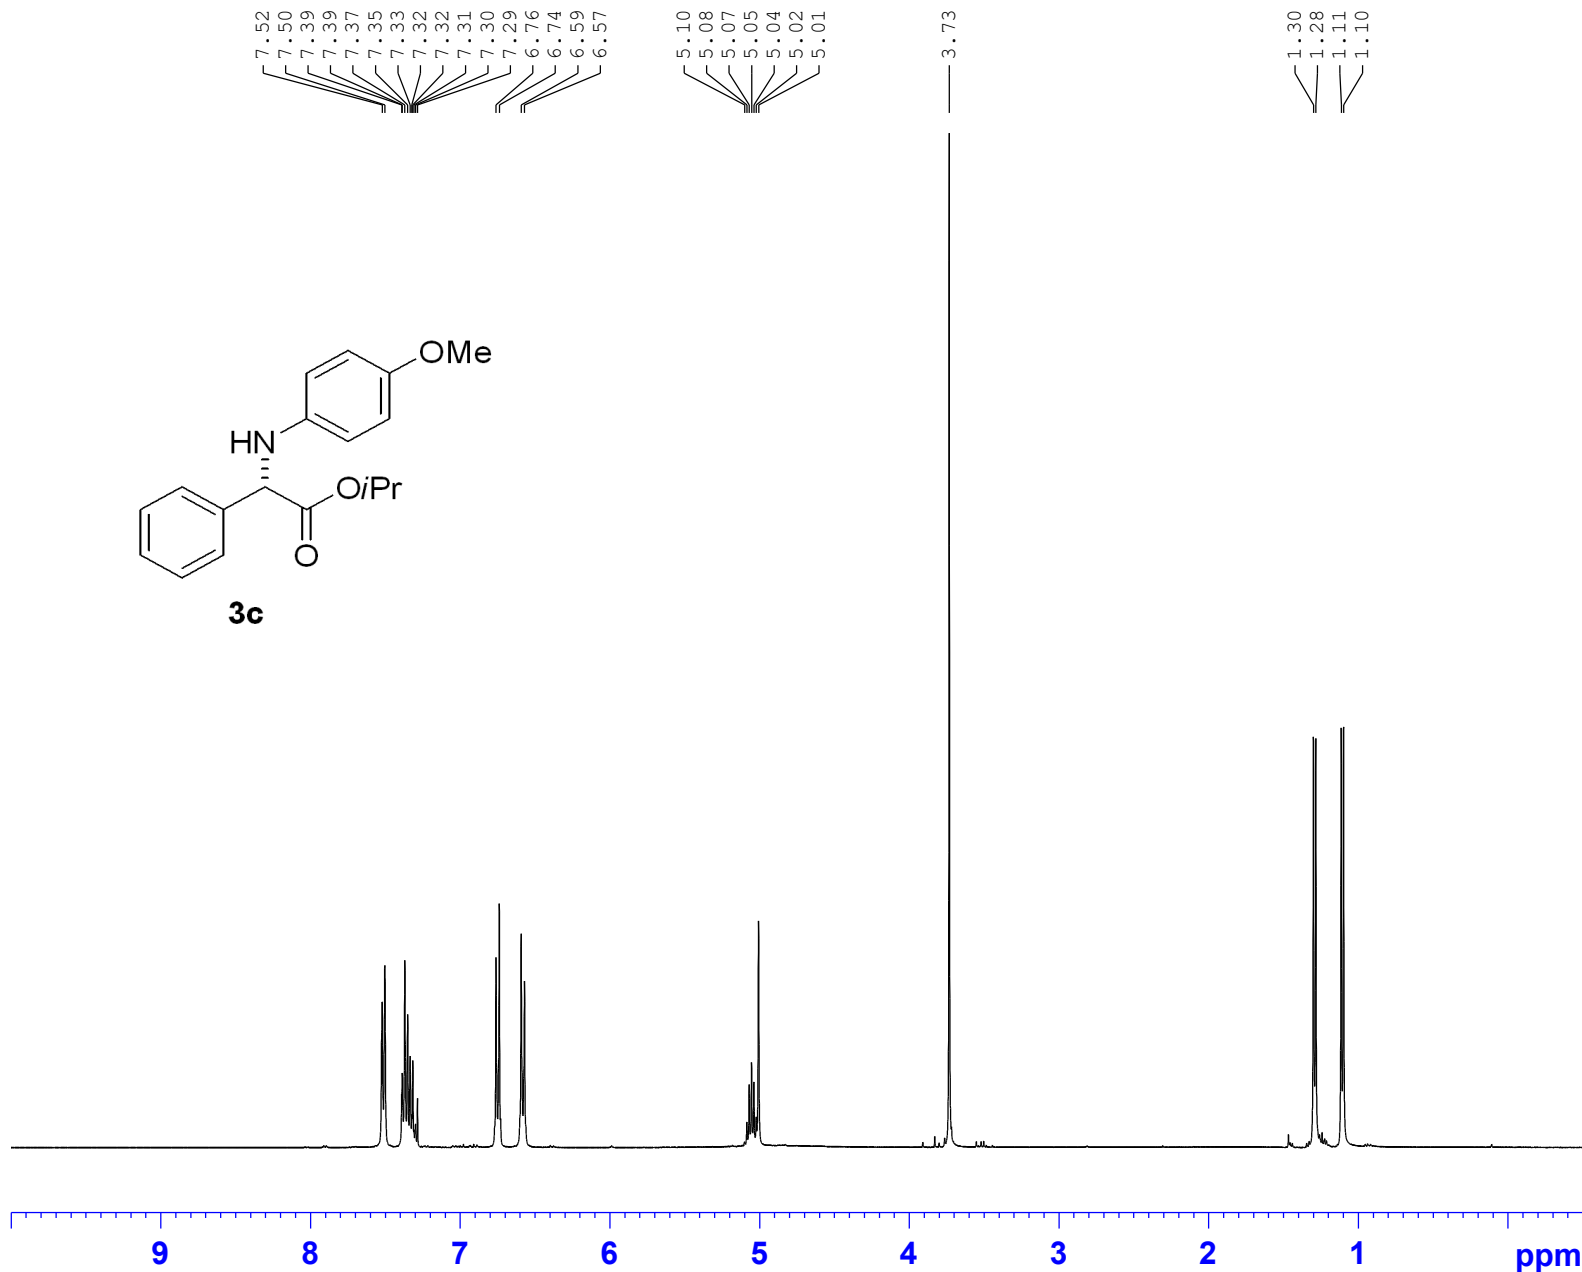

7.52  
7.50  
7.39  
7.39  
7.37  
7.35  
7.33  
7.32  
7.31  
7.30  
7.29  
6.76  
6.74  
6.59  
6.57

5.10  
5.08  
5.07  
5.05  
5.04  
5.02  
5.01

3.73

1.30  
1.28  
1.11  
1.10



NAME CNMR-gwg-8-102-1  
EXPNO 1  
PROCNO 1  
Date\_ 20200819  
Time\_ 19.48  
INSTRUM spect  
PROBHD 5 mm PABBO BB/  
PULPROG zgpg30  
TD 65536  
SOLVENT CDCl3  
NS 56  
DS 0  
SWH 24038.461 Hz  
FIDRES 0.366798 Hz  
AQ 1.3631988 sec  
RG 196.92  
DW 20.800 usec  
DE 6.50 usec  
TE 297.3 K  
D1 2.00000000 sec  
D11 0.03000000 sec  
TD0 1

==== CHANNEL f1 =====  
SFO1 100.6228298 MHz  
NUC1 13C  
P1 9.70 usec  
SI 32768  
SF 100.6127690 MHz  
WDW EM  
SSB 0  
LB 1.00 Hz  
GB 0  
PC 1.40

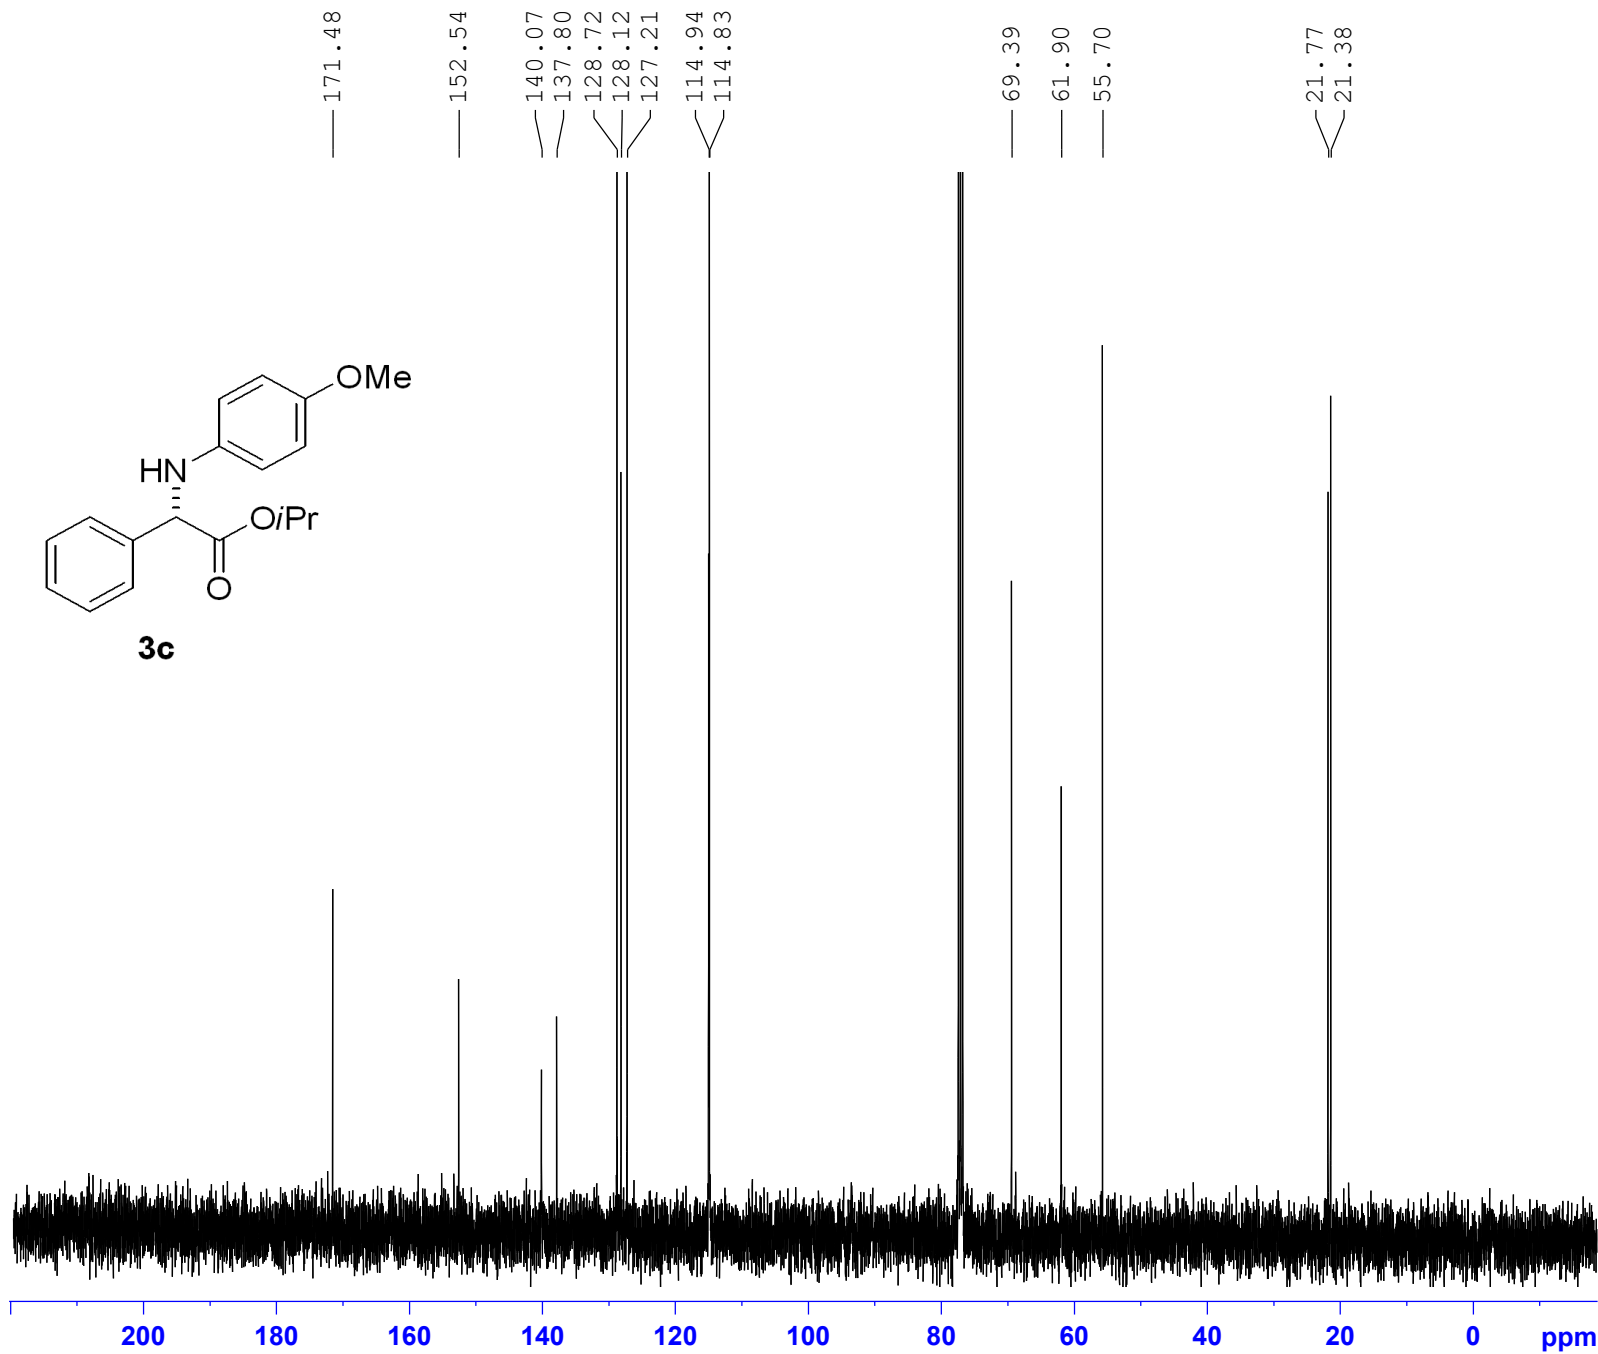



NAME HNMR-gwg-8-167-1  
EXPNO 1  
PROCNO 1  
Date\_ 20200909  
Time\_ 21.59  
INSTRUM spect  
PROBHD 5 mm PABBO BB/  
PULPROG zg30  
TD 65536  
SOLVENT CD2Cl2  
NS 4  
DS 0  
SWH 8012.820 Hz  
FIDRES 0.122266 Hz  
AQ 4.0894966 sec  
RG 39.46  
DW 62.400 usec  
DE 6.50 usec  
TE 297.1 K  
D1 1.00000000 sec  
TD0 1

==== CHANNEL f1 =====  
SFO1 400.1324710 MHz  
NUC1 1H  
P1 14.50 usec  
SI 65536  
SF 400.1300000 MHz  
WDW EM  
SSB 0  
LB 0.30 Hz  
GB 0  
PC 1.00

7.56  
7.55  
7.54  
7.44  
7.44  
7.43  
7.42  
7.41  
7.40  
7.39  
7.38  
7.38  
7.37  
7.36  
7.35  
6.78  
6.77  
6.76  
6.75  
6.74  
6.62  
6.61  
6.60  
6.59  
6.58  
5.94  
5.93  
5.92  
5.91  
5.90  
5.90  
5.89  
5.88  
5.87  
5.86  
5.84  
5.23  
5.23  
5.23  
5.22  
5.20  
5.20  
5.20  
5.19  
5.19  
5.19  
5.18  
5.13  
4.78  
4.71  
4.70  
4.68  
4.68  
4.67  
4.67  
4.66  
4.66  
4.65  
4.65  
4.64  
4.64  
4.61  
4.61  
3.73

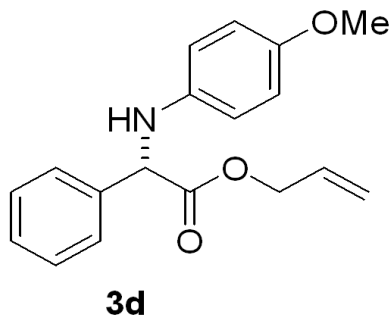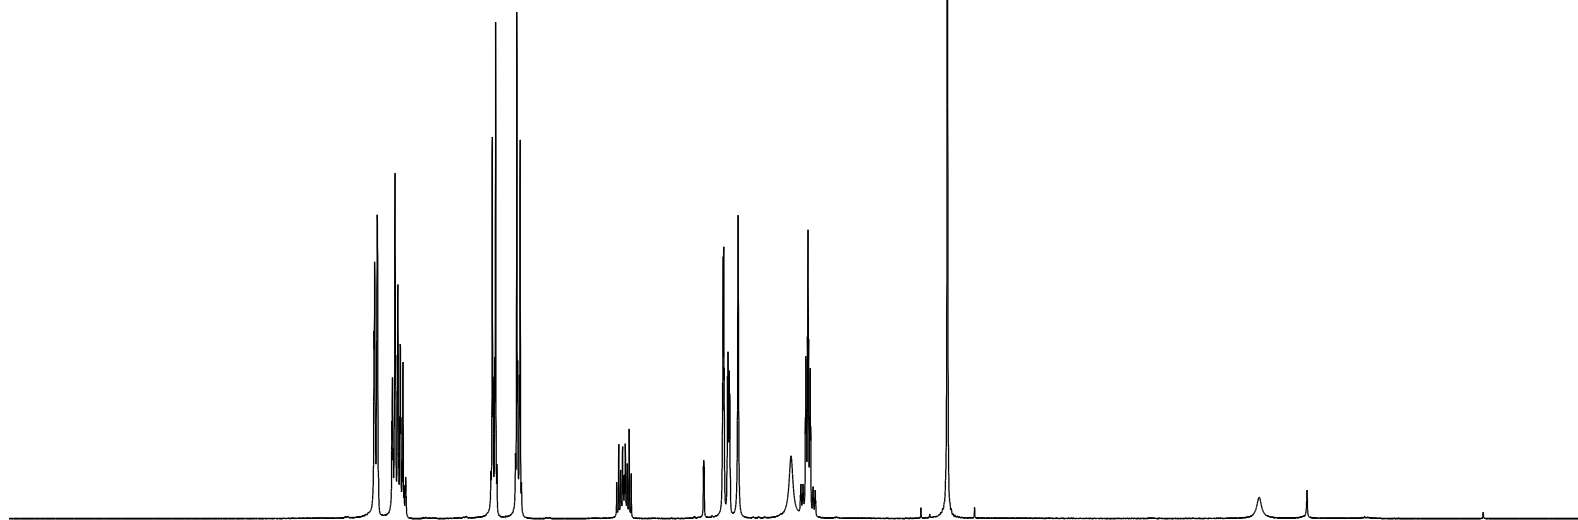

2.09  
3.00  
2.09  
2.07  
0.96  
3.00  
0.94  
2.10  
3.11

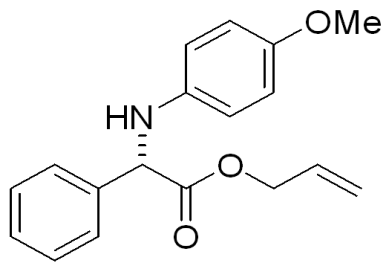

**3d**

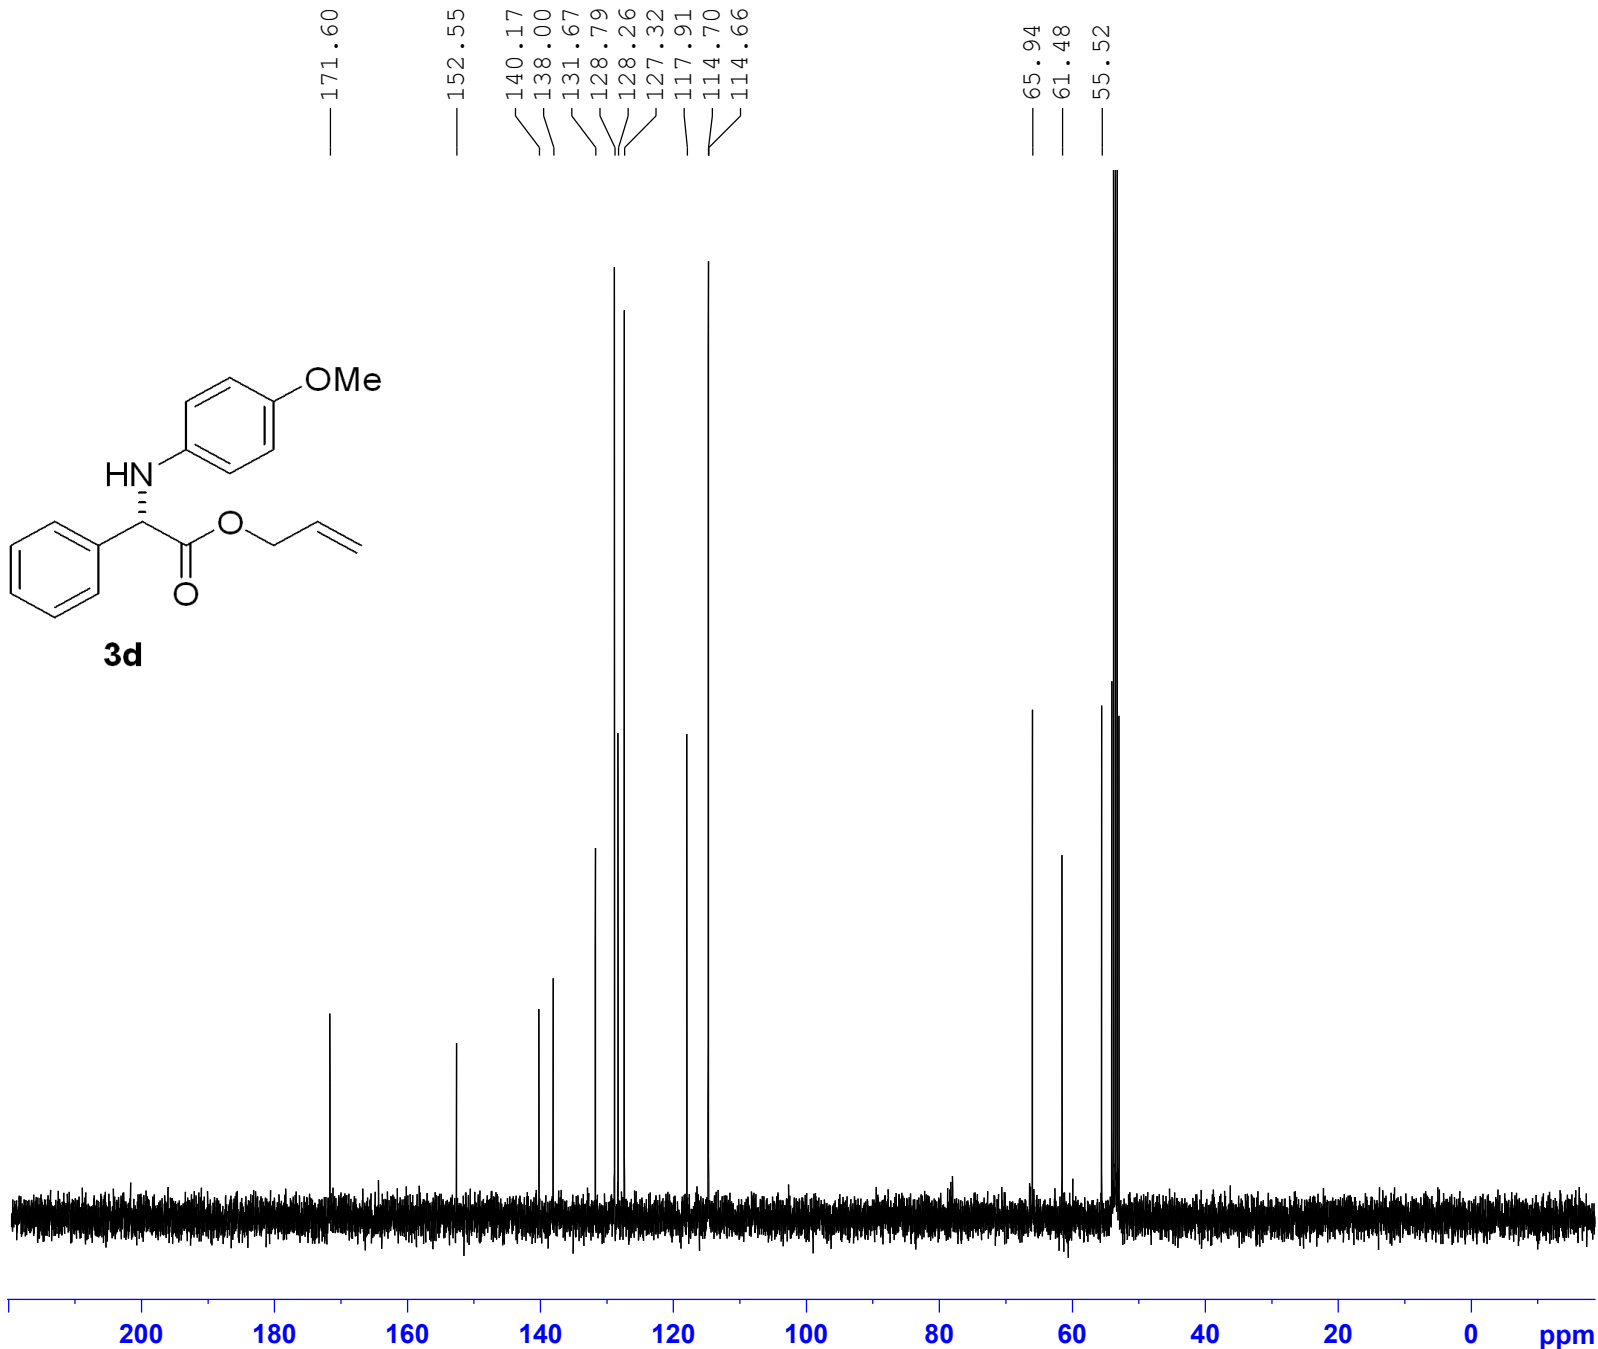

— 171.60  
 — 152.55  
 — 140.17  
 — 138.00  
 — 131.67  
 — 128.79  
 — 128.26  
 — 127.32  
 — 117.91  
 — 114.70  
 — 114.66

— 65.94  
 — 61.48  
 — 55.52

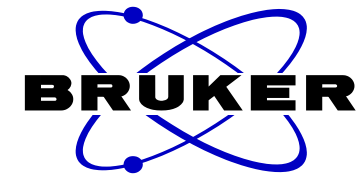

```

NAME      CNMR-gwg-8-167-1
EXPNO     1
PROCNO    1
Date_     20200909
Time_     22.03
INSTRUM   spect
PROBHD    5 mm PABBO BB/
PULPROG   zgpg30
TD        65536
SOLVENT   CD2C12
NS        19
DS        0
SWH       24038.461 Hz
FIDRES    0.366798 Hz
AQ        1.3631988 sec
RG        196.92
DW        20.800 usec
DE        6.50 usec
TE        297.5 K
D1        2.00000000 sec
D11       0.03000000 sec
TD0       1
  
```

```

===== CHANNEL f1 =====
SF01      100.6228298 MHz
NUC1      13C
P1        9.70 usec
SI        32768
SF        100.6127690 MHz
WDW       EM
SSB       0
LB        1.00 Hz
GB        0
PC        1.40
  
```



NAME HNMR-gwg-8-108-1  
EXPNO 1  
PROCNO 1  
Date\_ 20200822  
Time\_ 14.08  
INSTRUM spect  
PROBHD 5 mm PABBO BB/  
PULPROG zg30  
TD 65536  
SOLVENT CD2Cl2  
NS 4  
DS 0  
SWH 8012.820 Hz  
FIDRES 0.122266 Hz  
AQ 4.0894966 sec  
RG 82.92  
DW 62.400 usec  
DE 6.50 usec  
TE 296.5 K  
D1 1.00000000 sec  
TD0 1

==== CHANNEL f1 =====  
SFO1 400.1324710 MHz  
NUC1 1H  
P1 14.50 usec  
SI 65536  
SF 400.1300000 MHz  
WDW EM  
SSB 0  
LB 0.30 Hz  
GB 0  
PC 1.00

7.55  
7.55  
7.53  
7.53  
7.44  
7.44  
7.43  
7.43  
7.42  
7.41  
7.40  
7.40  
7.39  
7.39  
7.38  
7.38  
7.36  
7.36  
7.35  
7.35  
7.34  
7.34  
7.24  
7.24  
7.23  
7.23  
7.22  
7.22  
7.22  
6.76  
6.76  
6.75  
6.75  
6.74  
6.74  
6.60  
6.60  
6.59  
6.58  
6.58  
5.25  
5.22  
5.17  
5.17  
5.15  
5.15  
4.78  
4.78  
3.73

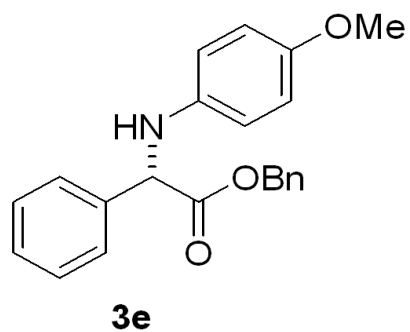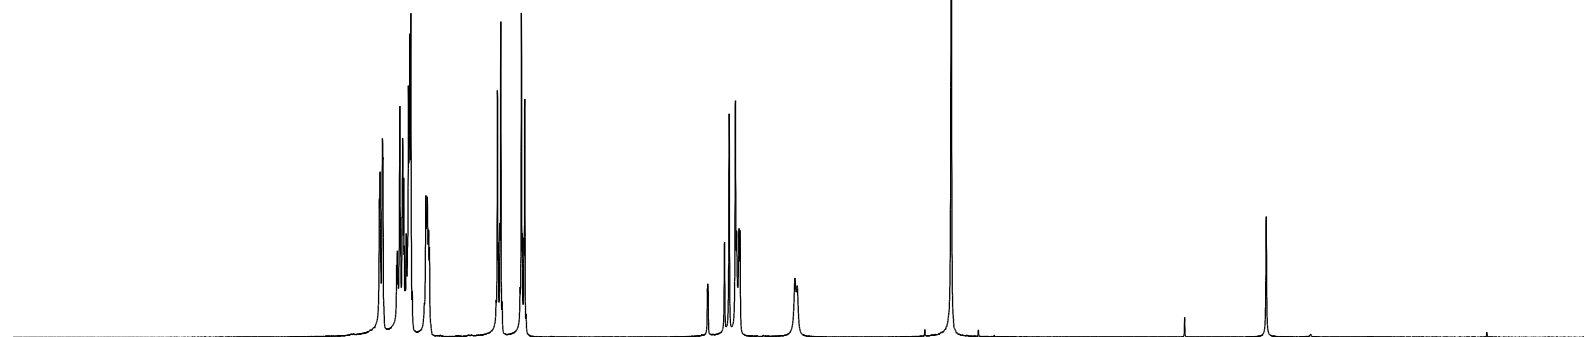

2.32  
6.37  
2.00

2.20  
2.21

3.22  
1.09

3.30





NAME CNMR-gwg-8-108-1  
EXPNO 1  
PROCNO 1  
Date\_ 20200822  
Time\_ 14.15  
INSTRUM spect  
PROBHD 5 mm PABBO BB/  
PULPROG zgpg30  
TD 65536  
SOLVENT CD2C12  
NS 24  
DS 0  
SWH 24038.461 Hz  
FIDRES 0.366798 Hz  
AQ 1.3631988 sec  
RG 196.92  
DW 20.800 usec  
DE 6.50 usec  
TE 297.1 K  
D1 2.00000000 sec  
D11 0.03000000 sec  
TD0 1

==== CHANNEL f1 =====  
SF01 100.6228298 MHz  
NUC1 13C  
P1 9.70 usec  
SI 32768  
SF 100.6127690 MHz  
WDW EM  
SSB 0  
LB 1.00 Hz  
GB 0  
PC 1.40

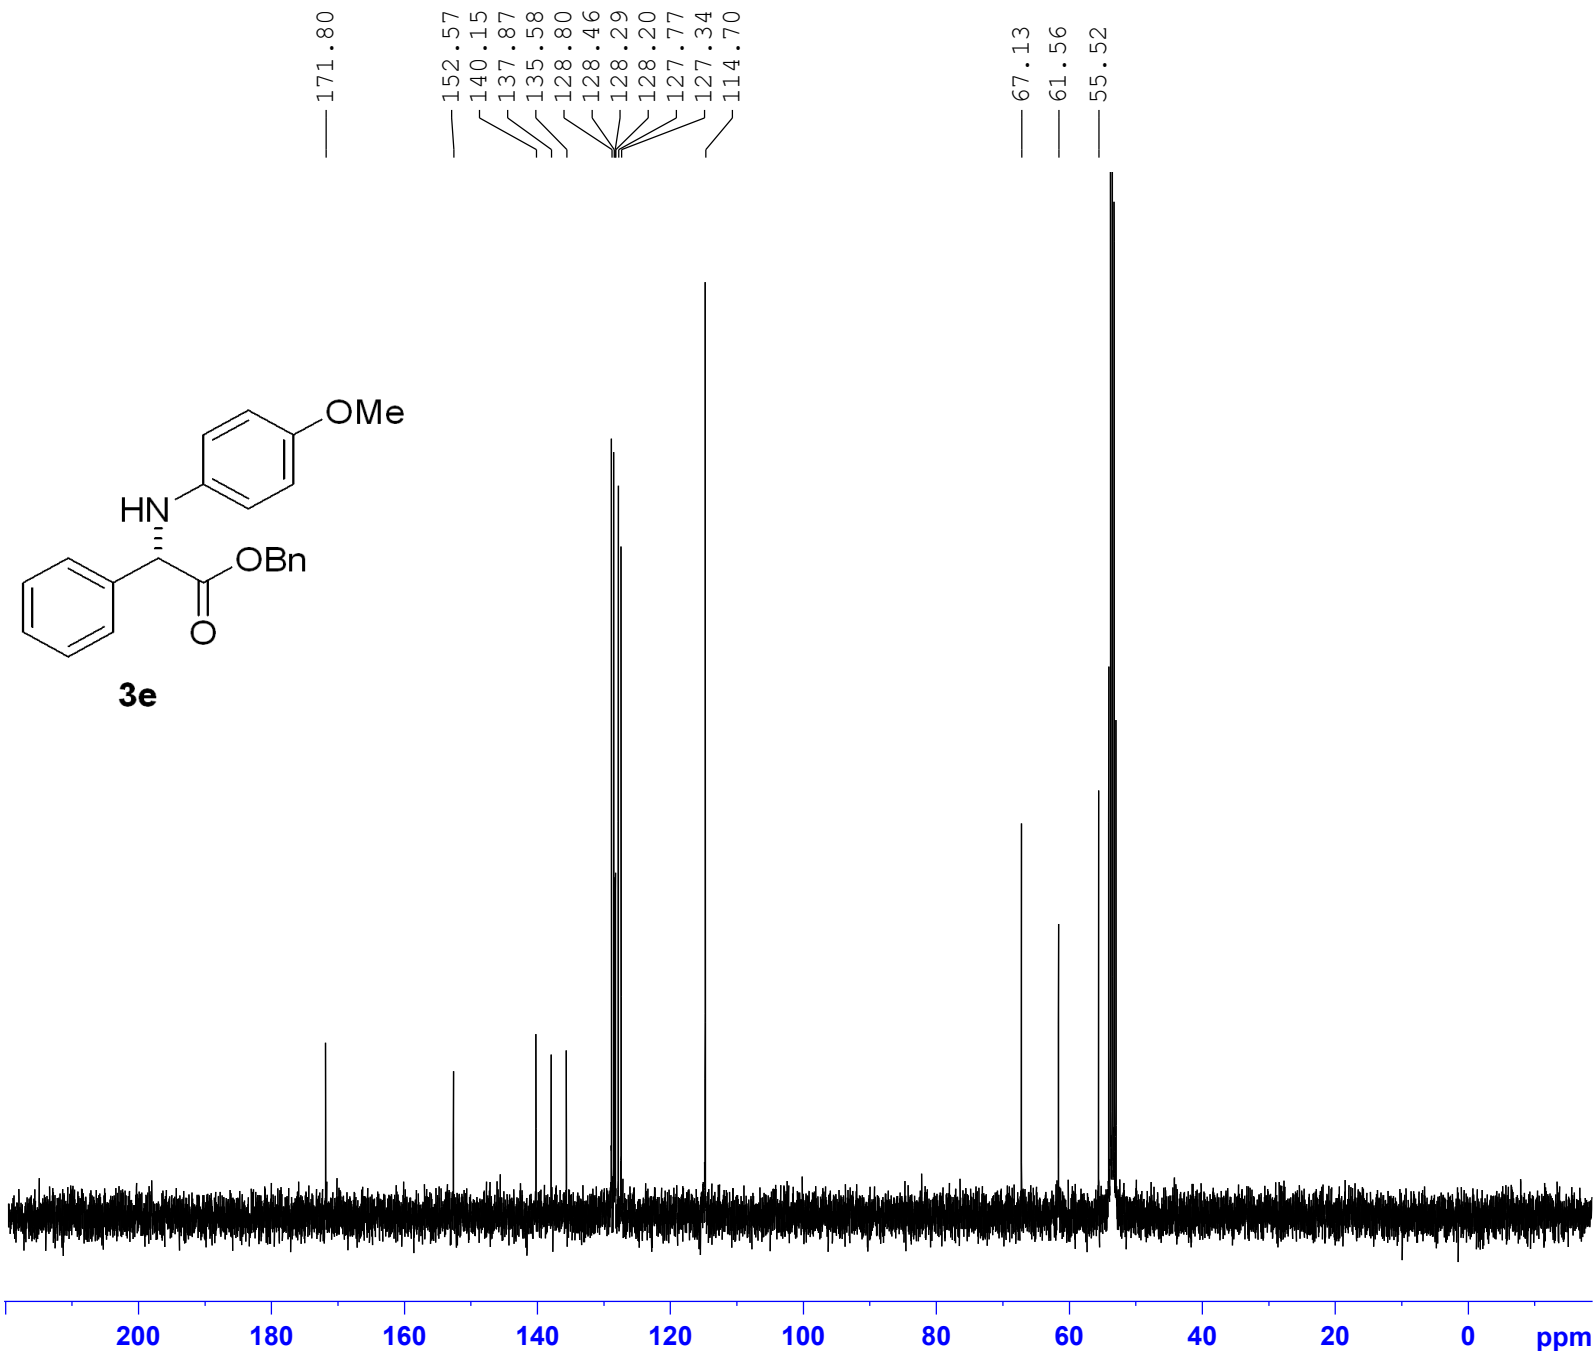



NAME HNMR-gwg-8-143-1  
EXPNO 1  
PROCNO 1  
Date\_ 20200903  
Time\_ 14.48  
INSTRUM spect  
PROBHD 5 mm PABBO BB/  
PULPROG zg30  
TD 65536  
SOLVENT CD2Cl2  
NS 4  
DS 0  
SWH 8012.820 Hz  
FIDRES 0.122266 Hz  
AQ 4.0894966 sec  
RG 31.55  
DW 62.400 usec  
DE 6.50 usec  
TE 296.5 K  
D1 1.00000000 sec  
TD0 1

==== CHANNEL f1 =====  
SFO1 400.1324710 MHz  
NUC1 1H  
P1 14.50 usec  
SI 65536  
SF 400.1300000 MHz  
WDW EM  
SSB 0  
LB 0.30 Hz  
GB 0  
PC 1.00

7.49  
7.49  
7.48  
7.47  
7.46  
7.45  
7.45  
7.44  
7.43  
7.43  
7.42  
7.42  
7.42  
7.41  
7.40  
7.39  
7.39  
7.32  
7.32  
7.31  
7.31  
7.30  
7.30  
7.30  
7.29  
7.28  
7.28  
7.28  
7.04  
7.03  
7.03  
7.02  
7.01  
7.01  
7.01  
6.84  
6.84  
6.83  
6.82  
6.81  
6.73  
6.72  
6.71  
6.70  
6.70  
5.39  
4.79  
3.77

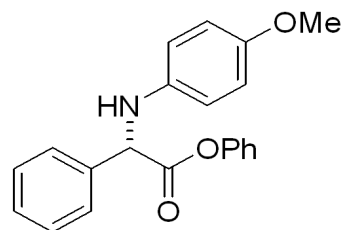

3f

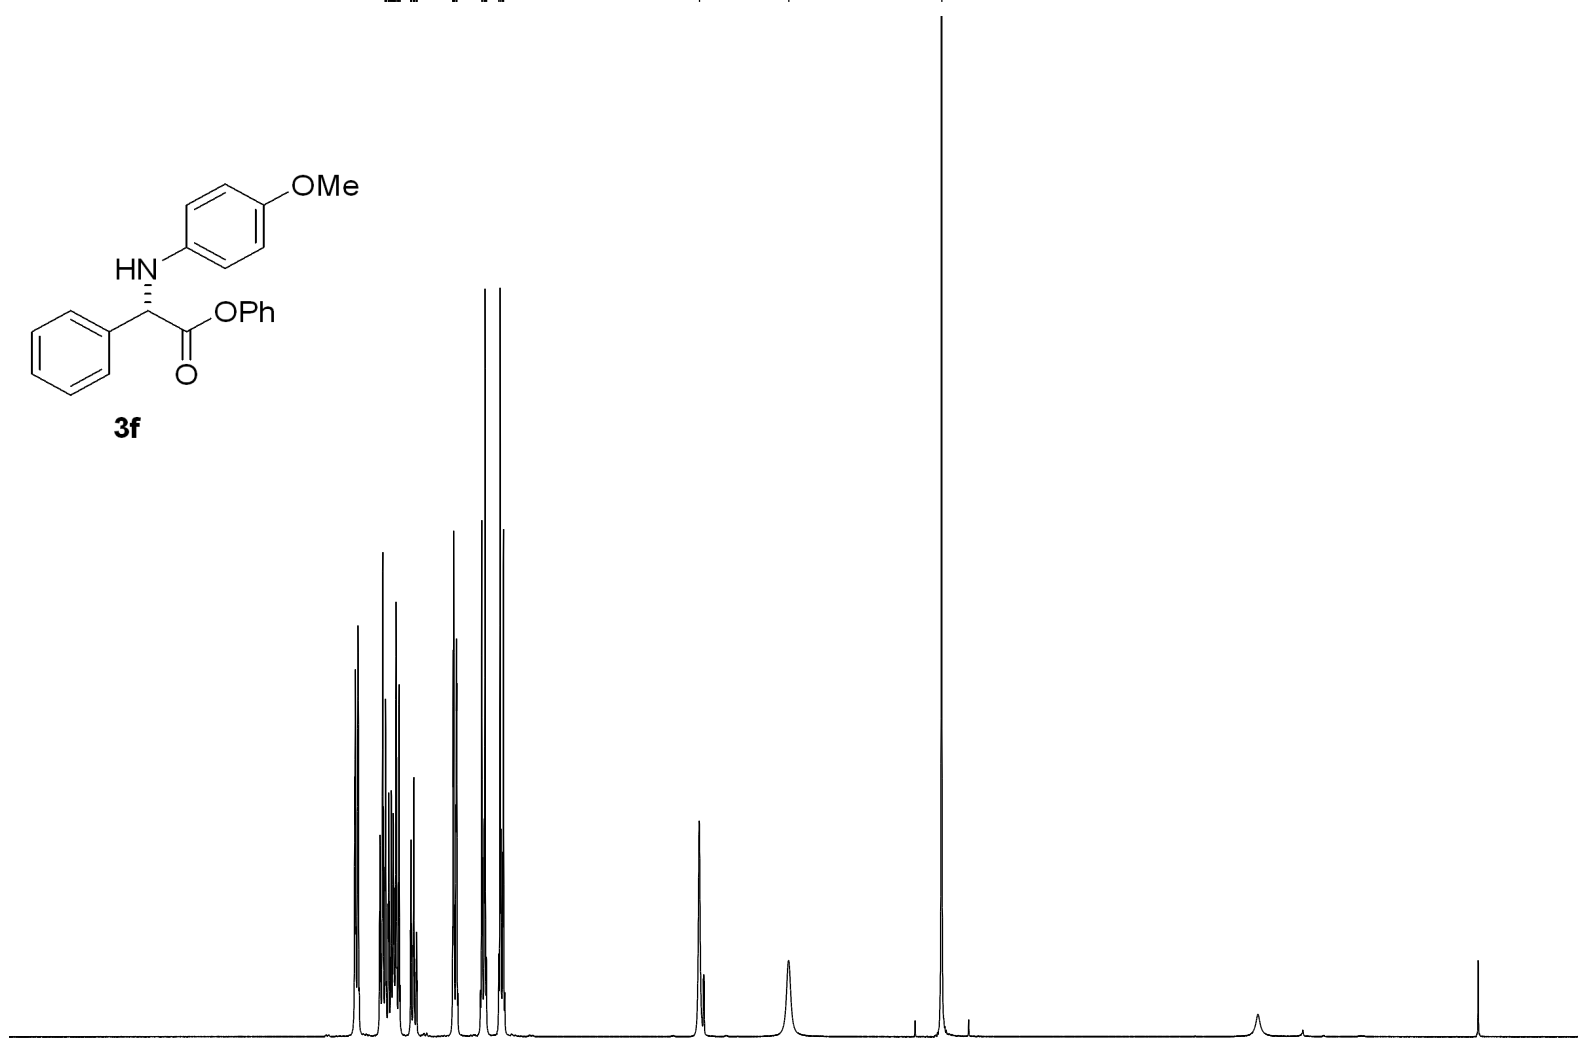

9 8 7 6 5 4 3 2 1 ppm

1.99  
4.92  
0.97  
1.96  
1.99  
2.00  
1.12  
0.96  
3.00

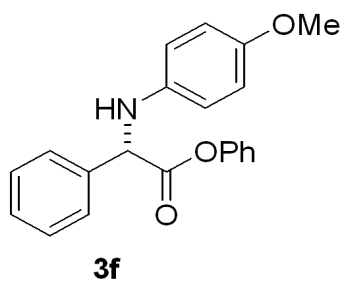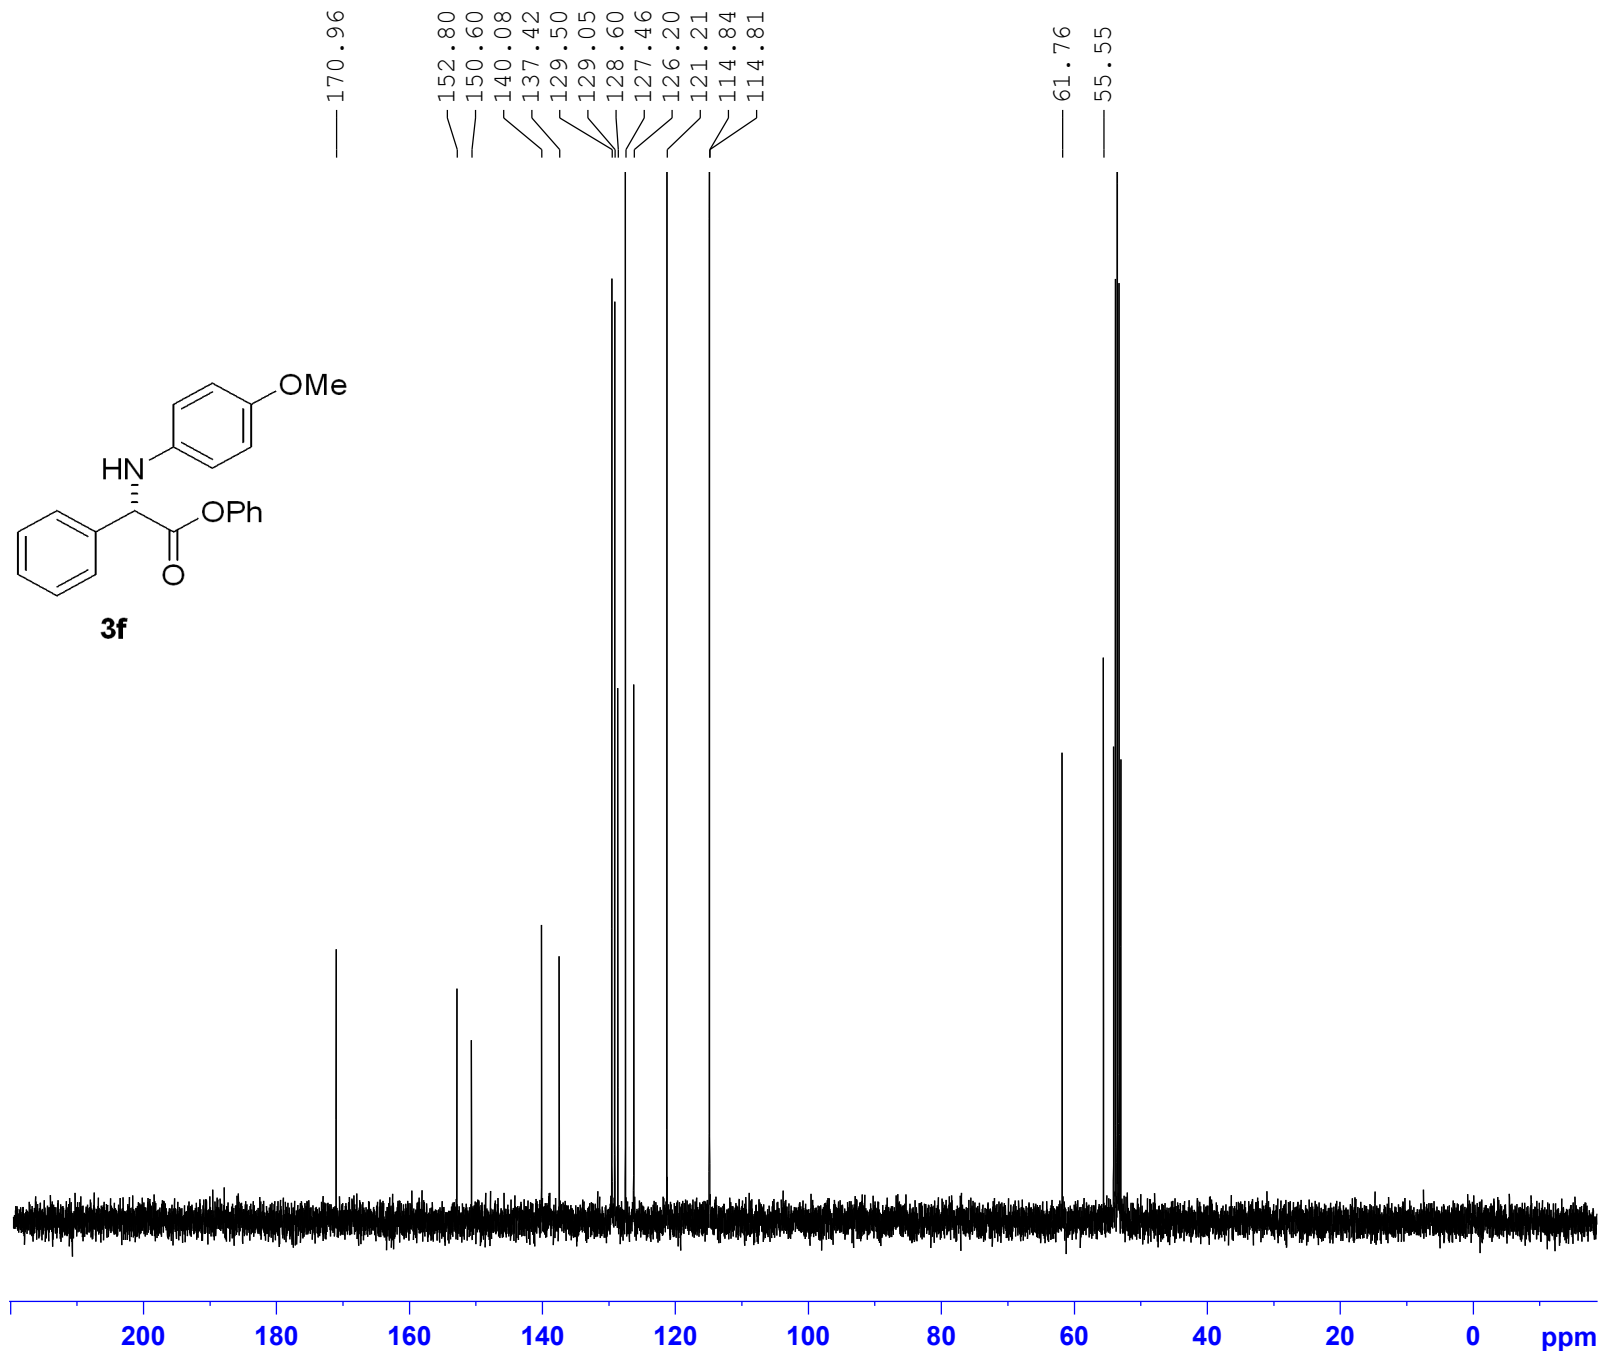

```

NAME      CNMR-gwg-8-143-1
EXPNO     1
PROCNO    1
Date_     20200903
Time_     14.51
INSTRUM   spect
PROBHD    5 mm PABBO BB/
PULPROG   zgpg30
TD         65536
SOLVENT   CD2C12
NS         14
DS         0
SWH        24038.461 Hz
FIDRES     0.366798 Hz
AQ         1.3631988 sec
RG         196.92
DW         20.800 usec
DE         6.50 usec
TE         297.0 K
D1         2.00000000 sec
D11        0.03000000 sec
TD0        1
  
```

```

===== CHANNEL f1 =====
SF01      100.6228298 MHz
NUC1       13C
P1         9.70 usec
SI         32768
SF         100.6127690 MHz
WDW        EM
SSB        0
LB         1.00 Hz
GB         0
PC         1.40
  
```



NAME HNMR-gwg-8-140-1  
EXPNO 1  
PROCNO 1  
Date\_ 20200902  
Time\_ 17.45  
INSTRUM spect  
PROBHD 5 mm PABBO BB/  
PULPROG zg30  
TD 65536  
SOLVENT CD2Cl2  
NS 4  
DS 0  
SWH 8012.820 Hz  
FIDRES 0.122266 Hz  
AQ 4.0894966 sec  
RG 27.78  
DW 62.400 usec  
DE 6.50 usec  
TE 296.8 K  
D1 1.00000000 sec  
TD0 1

==== CHANNEL f1 =====  
SFO1 400.1324710 MHz  
NUC1 1H  
P1 14.50 usec  
SI 65536  
SF 400.1300000 MHz  
WDW EM  
SSB 0  
LB 0.30 Hz  
GB 0  
PC 1.00

7.53  
7.52  
7.51  
7.50  
7.42  
7.41  
7.39  
7.38  
7.37  
7.36  
7.27  
7.26  
7.25  
7.25  
6.79  
6.78  
6.78  
6.77  
6.76  
6.75  
6.61  
6.60  
6.59  
6.58  
6.58  
6.57  
5.26  
5.23  
5.20  
5.16  
5.15  
4.83

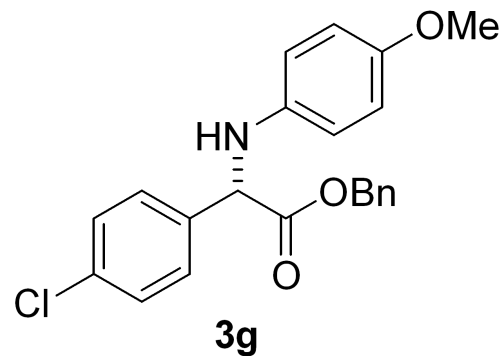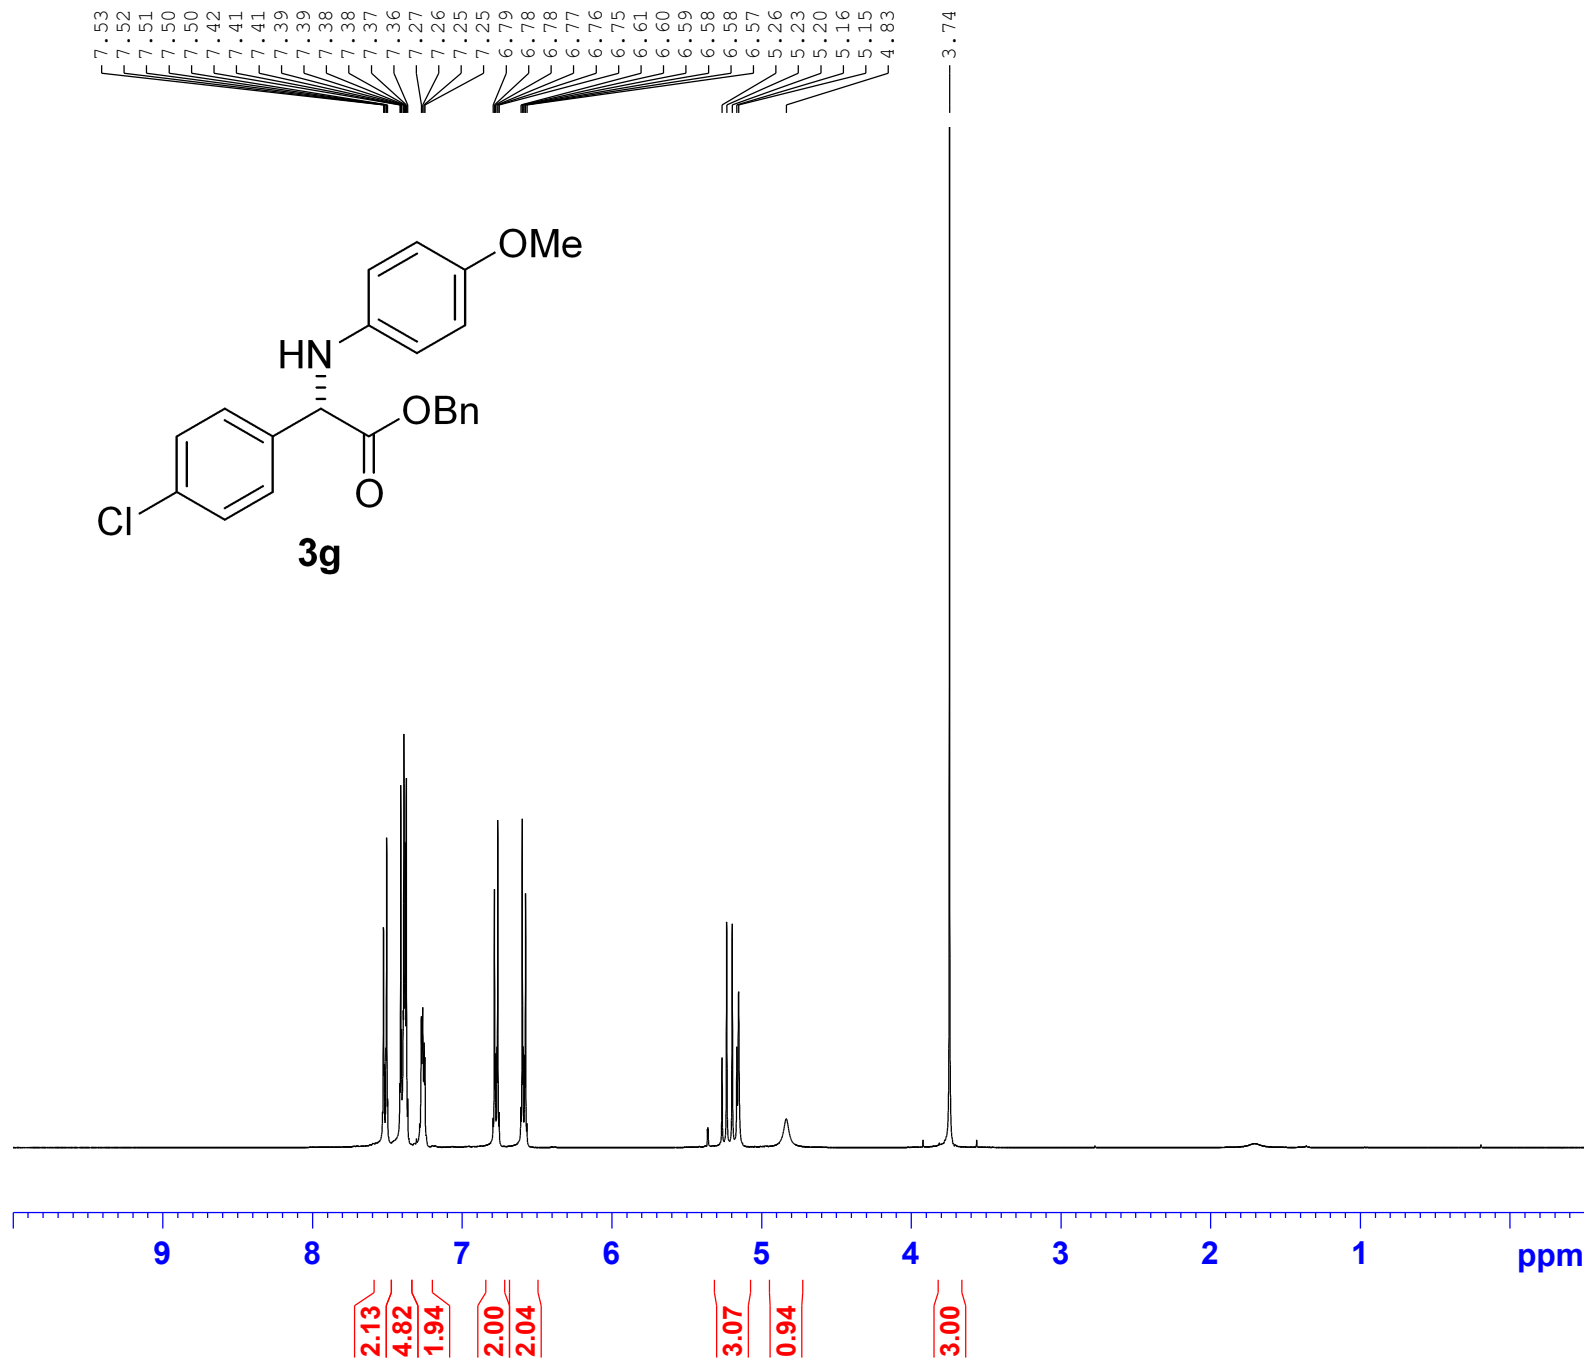



NAME CNMR-gwg-8-140-1-true  
EXPNO 1  
PROCNO 1  
Date\_ 20200902  
Time\_ 17.49  
INSTRUM spect  
PROBHD 5 mm PABBO BB/  
PULPROG zgpg30  
TD 65536  
SOLVENT CD2Cl2  
NS 17  
DS 0  
SWH 24038.461 Hz  
FIDRES 0.366798 Hz  
AQ 1.3631988 sec  
RG 196.92  
DW 20.800 usec  
DE 6.50 usec  
TE 296.9 K  
D1 2.00000000 sec  
D11 0.03000000 sec  
TDO 1

==== CHANNEL f1 =====  
SFO1 100.6228298 MHz  
NUC1 13C  
P1 9.70 usec  
SI 32768  
SF 100.6127690 MHz  
WDW EM  
SSB 0  
LB 1.00 Hz  
GB 0  
PC 1.40

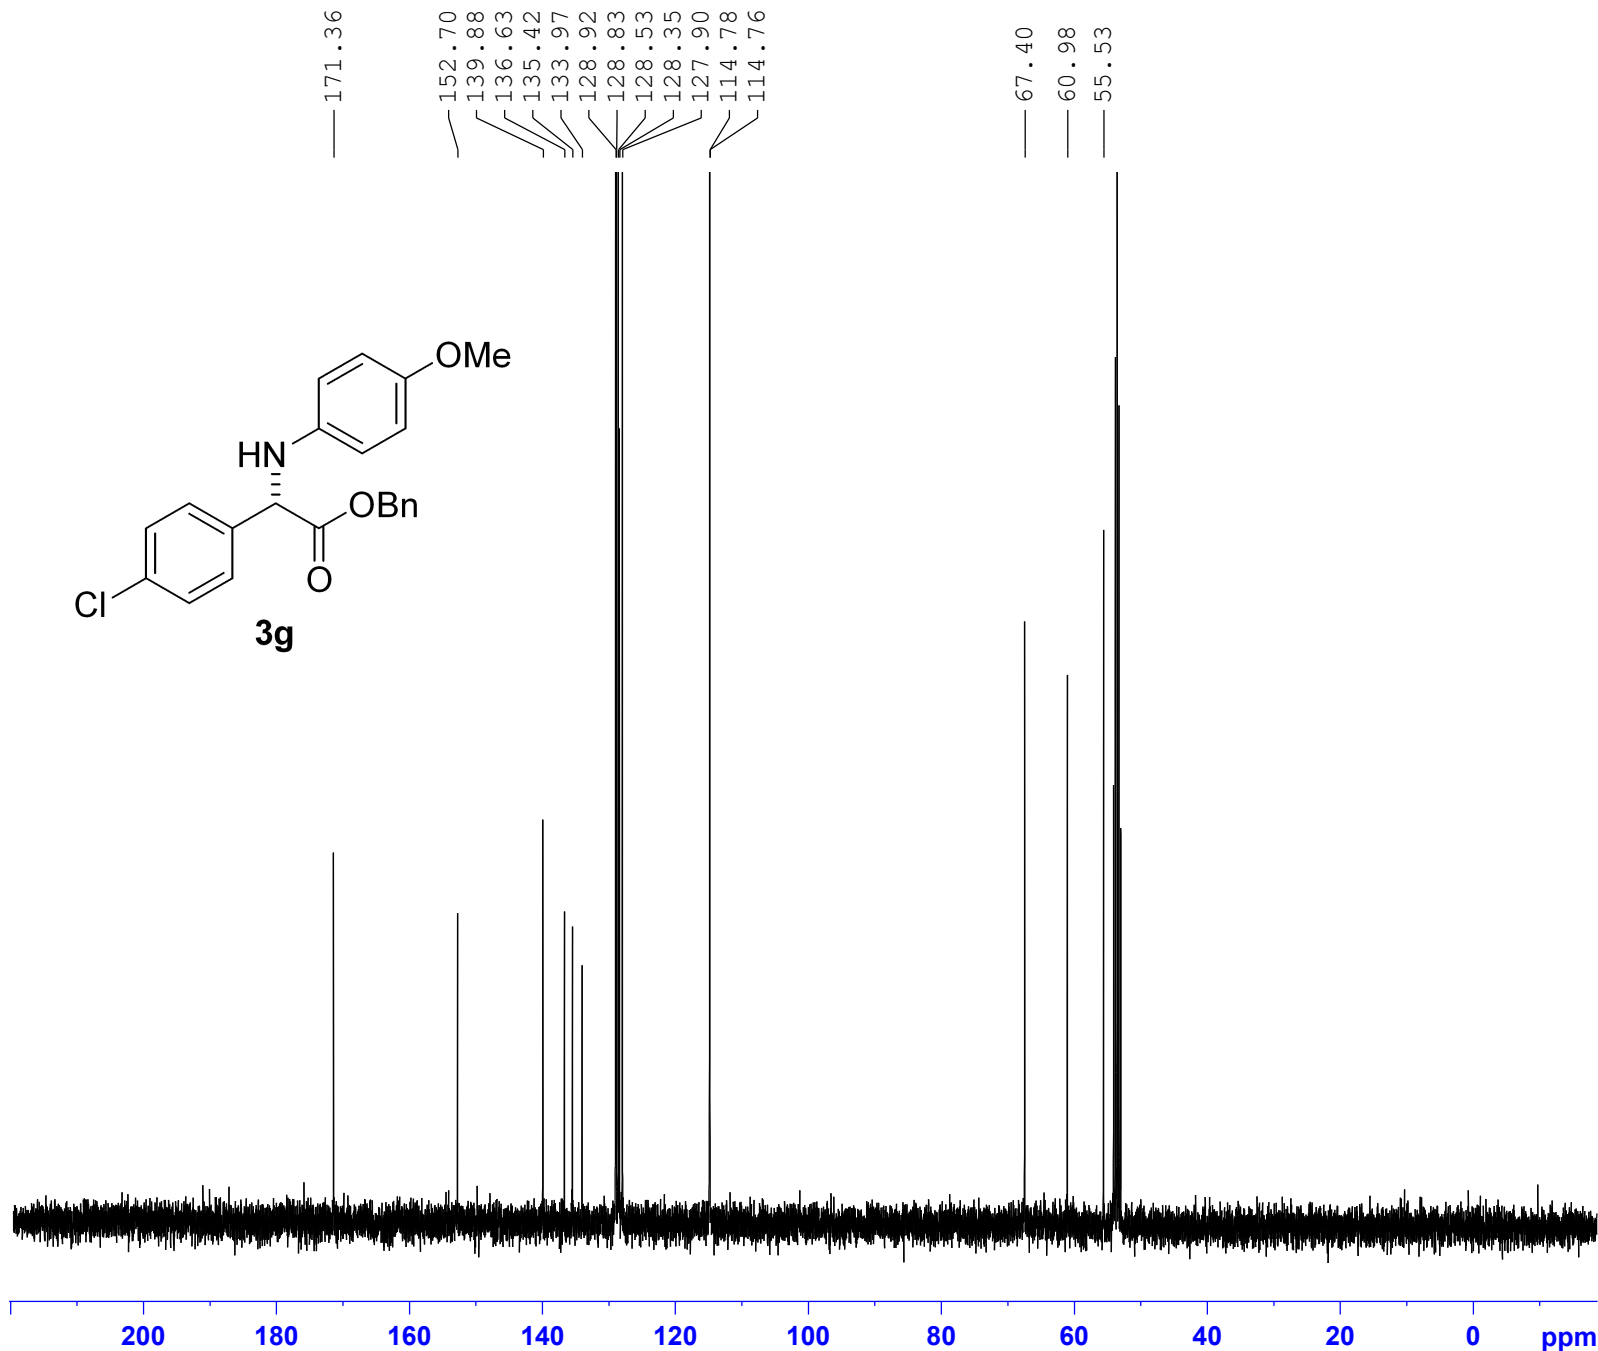

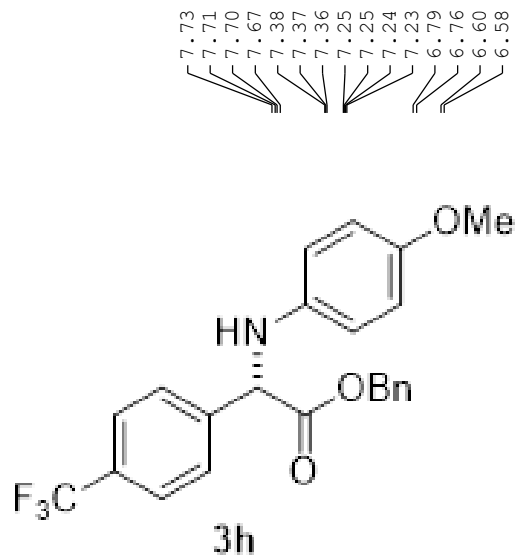

7.73  
7.71  
7.70  
7.67  
7.38  
7.37  
7.36  
7.25  
7.25  
7.24  
7.23  
6.79  
6.76  
6.60  
6.58

5.27  
5.24  
5.21  
5.18  
4.91

3.74

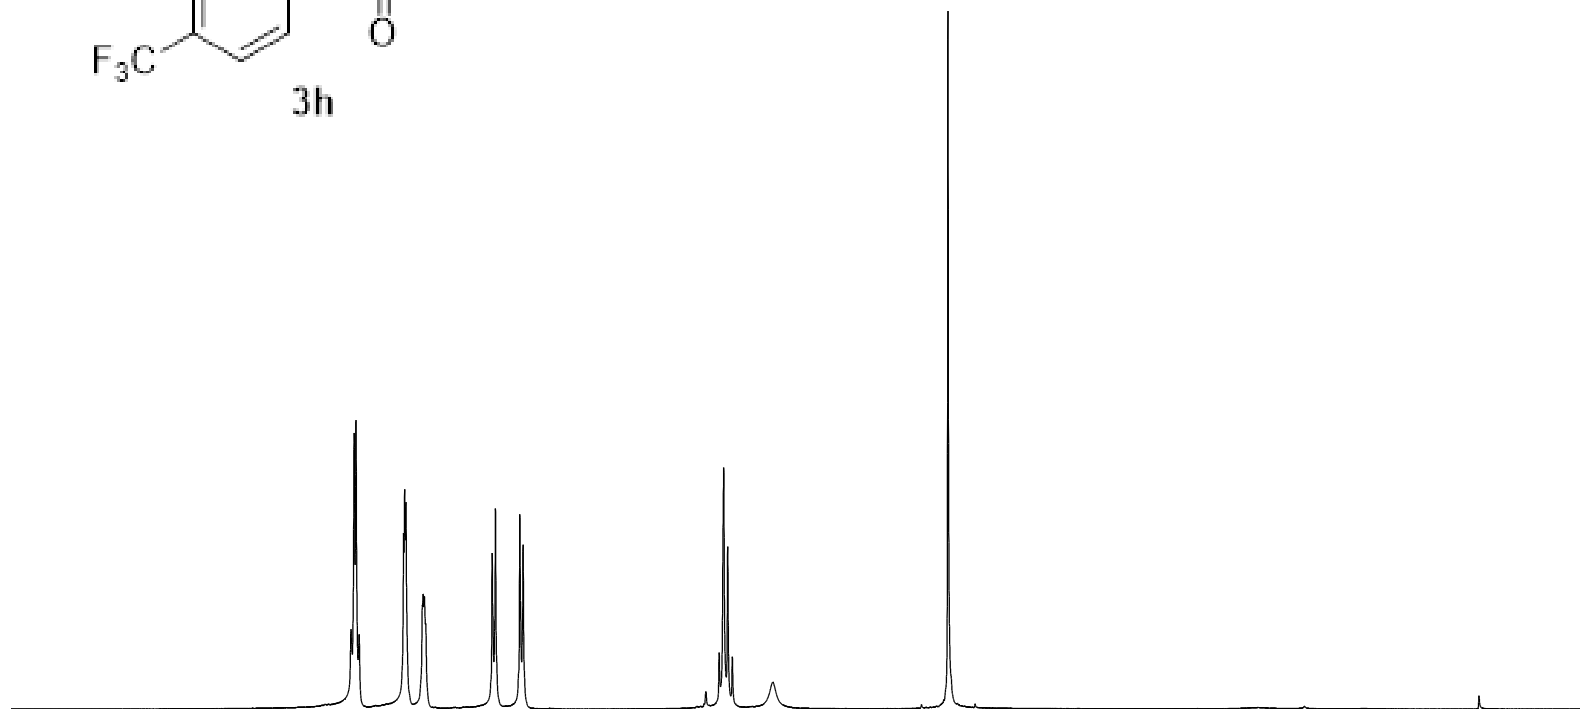

9 8 7 6 5 4 3 2 1 ppm

4.03  
3.06  
1.91  
2.13  
2.05

3.08  
0.99

3.00

NAME HNMR-gwg-8-141-1  
EXPNO 1  
PROCNO 1  
Date\_ 20200902  
Time\_ 17.32  
INSTRUM spect  
PROBHD 5 mm PABBO BB/  
PULPROG zg30  
TD 65536  
SOLVENT CD2Cl2  
NS 4  
DS 0  
SWH 8012.820 Hz  
FIDRES 0.122266 Hz  
AQ 4.0894966 sec  
RG 39.46  
DW 62.400 usec  
DE 6.50 usec  
TE 296.7 K  
D1 1.00000000 sec  
TD0 1

==== CHANNEL f1 =====  
SFO1 400.1324710 MHz  
NUC1 1H  
P1 14.50 usec  
SI 65536  
SF 400.1300000 MHz  
WDW EM  
SSB 0  
LB 0.30 Hz  
GB 0  
PC 1.00

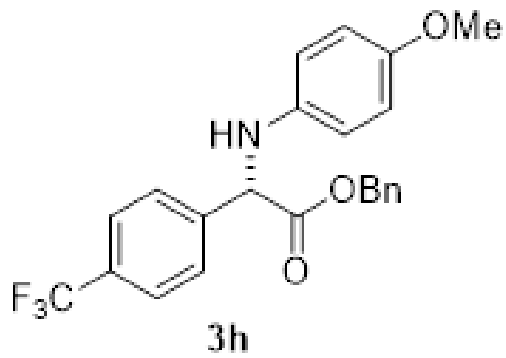

170.96  
 152.79  
 142.27  
 139.72  
 135.30  
 130.71  
 130.39  
 130.07  
 129.74  
 128.51  
 128.39  
 127.88  
 125.75  
 125.72  
 125.68  
 125.64  
 125.55  
 122.84  
 114.78

67.54  
 61.29  
 55.49

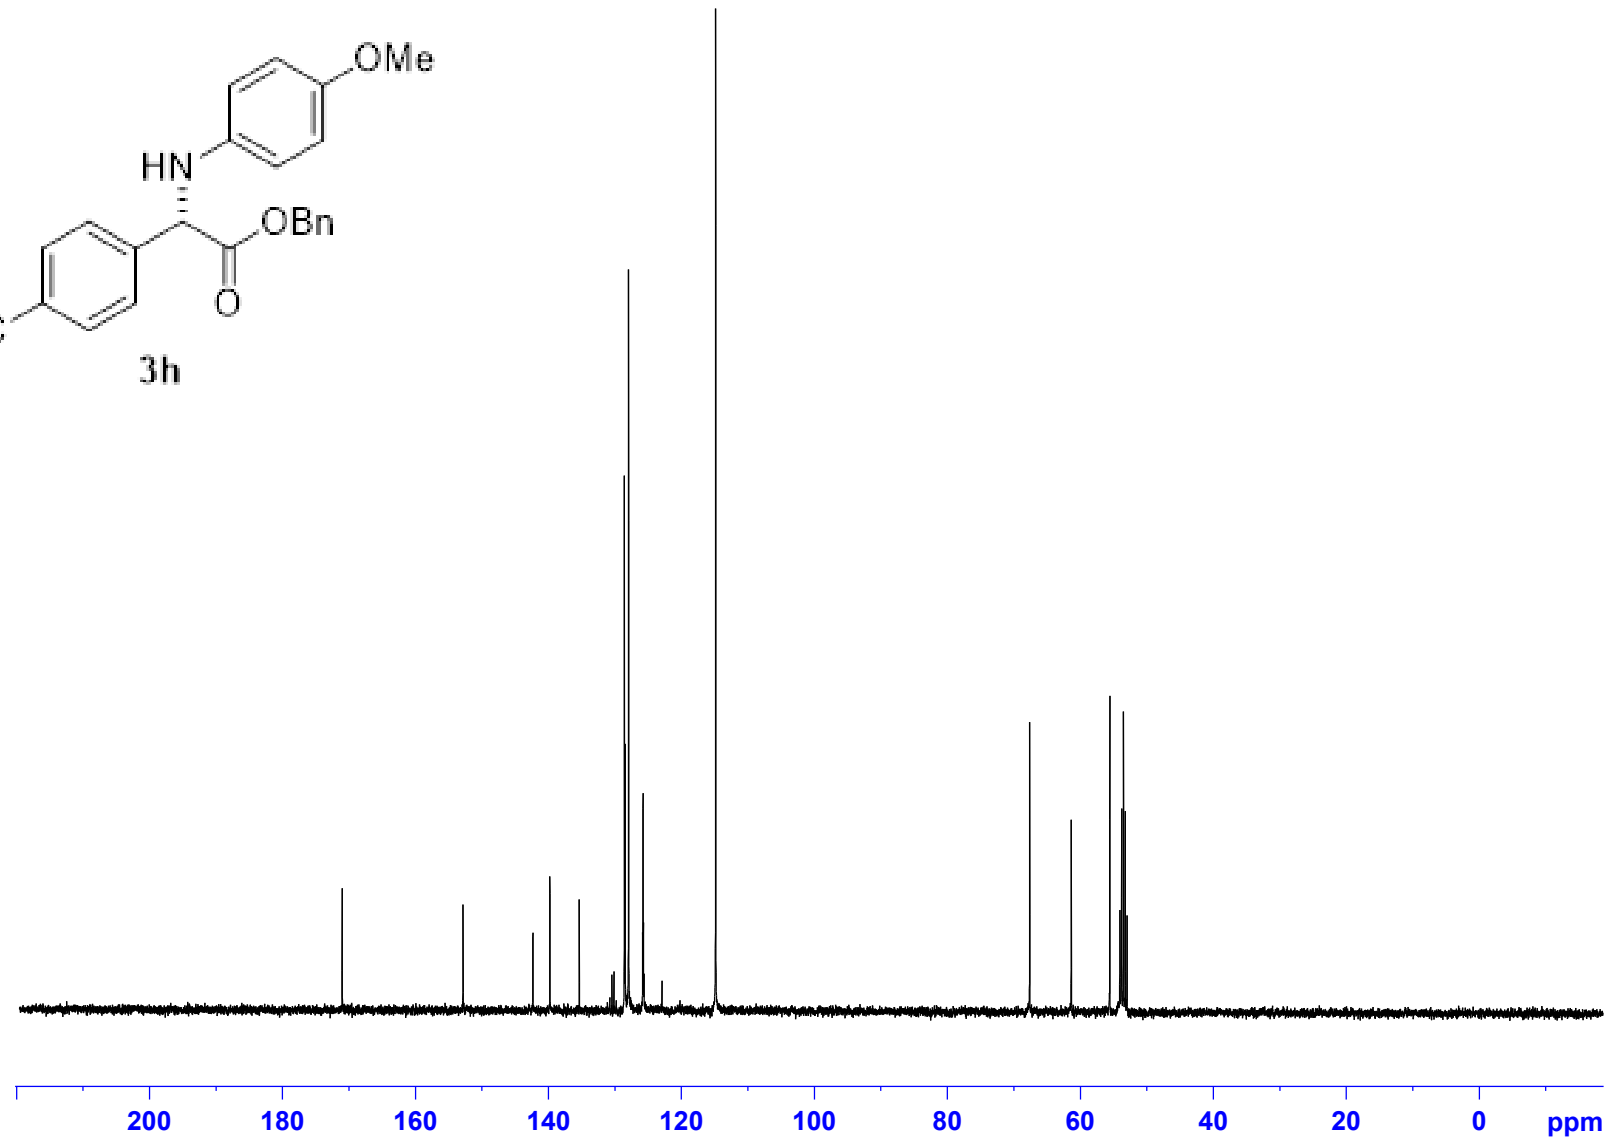

S-119

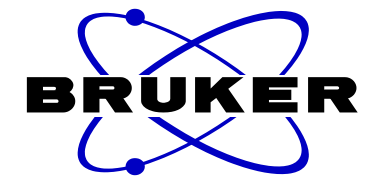

```

NAME      CNMR-gwg-8-141-1
EXPNO     1
PROCNO    1
Date_     20200902
Time_     17.36
INSTRUM   spect
PROBHD    5 mm PABBO BB/
PULPROG   zgpg30
TD        65536
SOLVENT   CD2C12
NS        97
DS        0
SWH       24038.461 Hz
FIDRES    0.366798 Hz
AQ        1.3631988 sec
RG        196.92
DW        20.800 usec
DE        6.50 usec
TE        297.5 K
D1        2.00000000 sec
D11       0.03000000 sec
TD0       1
  
```

```

===== CHANNEL f1 =====
SF01    100.6228298 MHz
NUC1     13C
P1       9.70 usec
SI       32768
SF       100.6127690 MHz
WDW      EM
SSB      0
LB       1.00 Hz
GB       0
PC       1.40
  
```

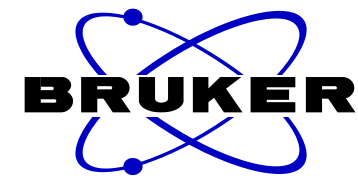

NAME FNMR-gwg-8-141-1  
EXPNO 1  
PROCNO 1  
Date\_ 20200902  
Time\_ 17.41  
INSTRUM spect  
PROBHD 5 mm PABBO BB/  
PULPROG zgpg30  
TD 65536  
SOLVENT CD2Cl2  
NS 4  
DS 0  
SWH 93750.000 Hz  
FIDRES 1.430511 Hz  
AQ 0.3495753 sec  
RG 196.92  
DW 5.333 usec  
DE 6.50 usec  
TE 297.2 K  
D1 2.00000000 sec  
D11 0.03000000 sec  
TD0 1

==== CHANNEL f1 =====  
SFO1 376.4607162 MHz  
NUC1 19F  
P1 14.70 usec  
SI 32768  
SF 376.4983660 MHz  
WDW EM  
SSB 0  
LB 1.00 Hz  
GB 0  
PC 1.40

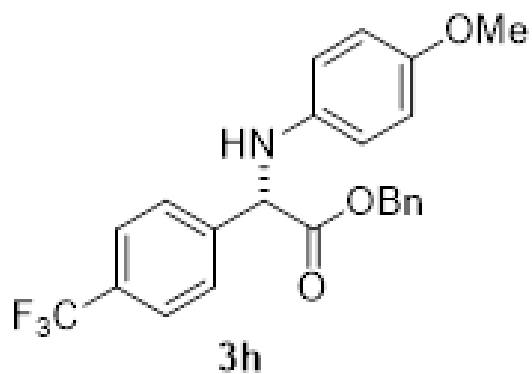

— -62.77

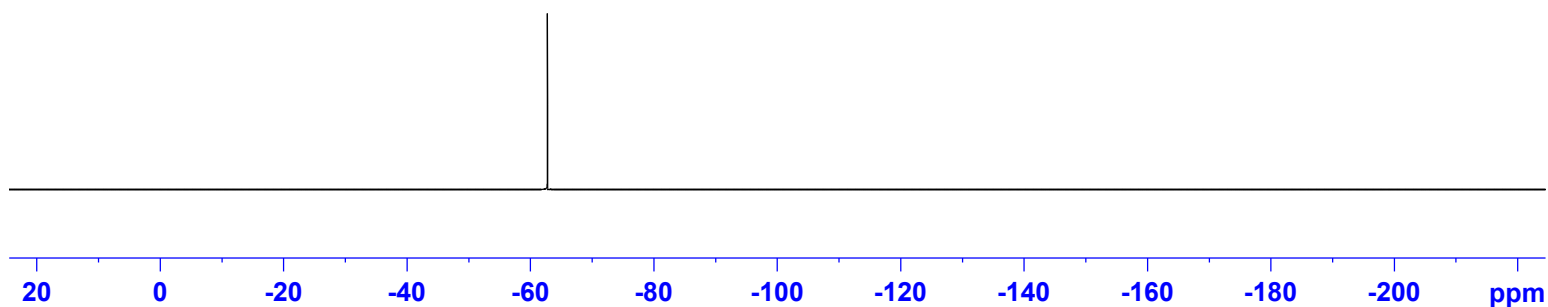

S-120



7.72  
7.71  
7.70  
7.70  
7.69  
7.35  
7.33  
7.32  
7.32  
7.31  
7.31  
7.30  
7.30  
7.24  
7.24  
7.24  
7.23  
7.23  
7.22  
7.22  
6.74  
6.74  
6.73  
6.72  
6.72  
6.71  
6.70  
6.70  
6.69  
6.69  
5.46  
5.44  
5.34  
5.33  
5.33  
5.23  
5.20  
5.20  
5.16  
3.67



NAME HNMR-gwg-8-144-1  
EXPNO 1  
PROCNO 1  
Date\_ 20200904  
Time\_ 13.18  
INSTRUM spect  
PROBHD 5 mm PABBO BB/  
PULPROG zg30  
TD 65536  
SOLVENT Acetone  
NS 4  
DS 0  
SWH 8012.820 Hz  
FIDRES 0.122266 Hz  
AQ 4.0894966 sec  
RG 31.55  
DW 62.400 usec  
DE 6.50 usec  
TE 296.9 K  
D1 1.00000000 sec  
TD0 1

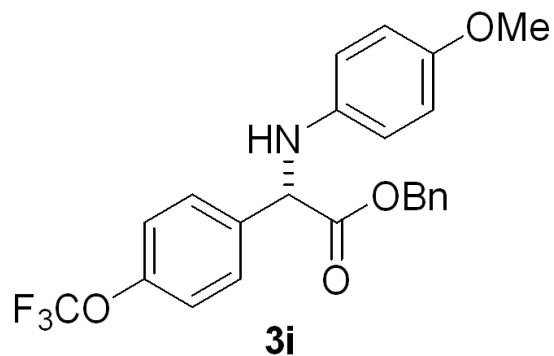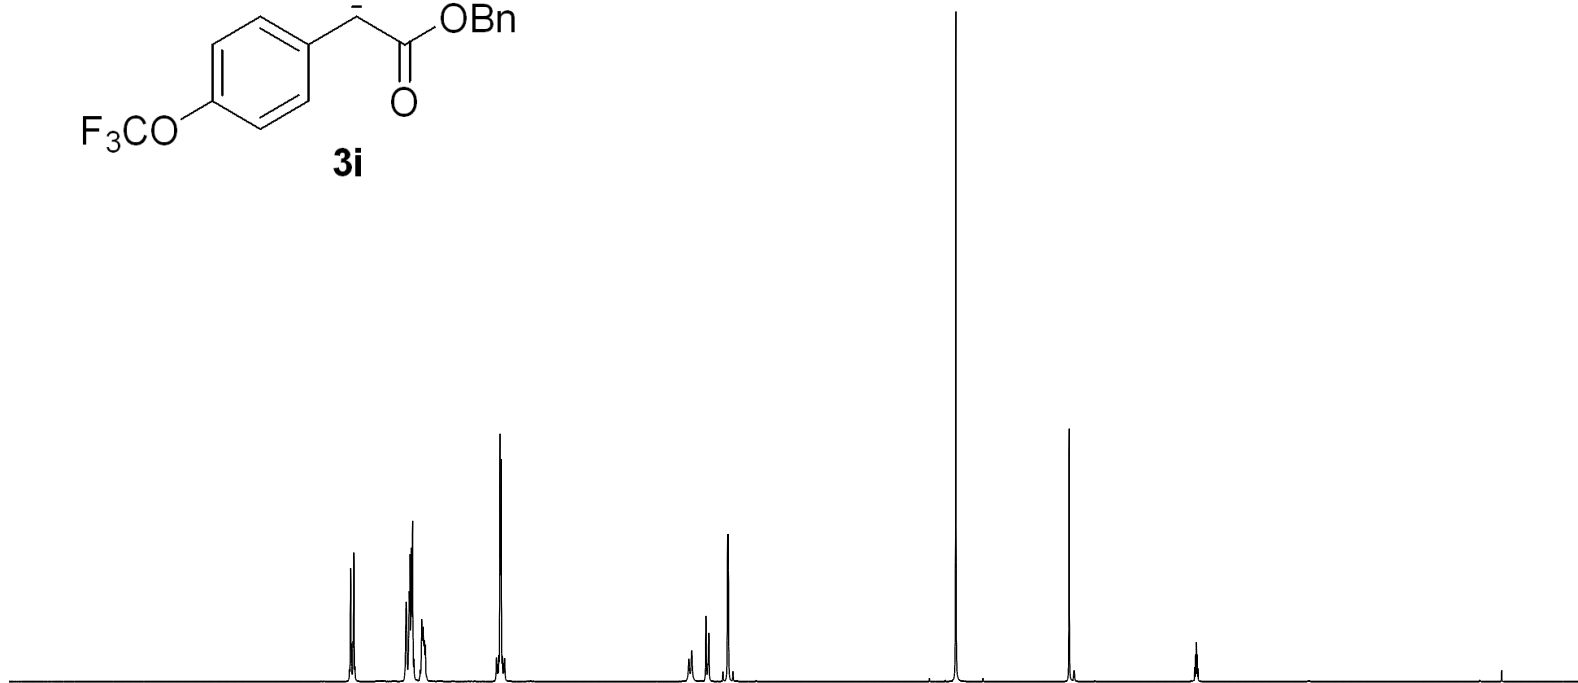

==== CHANNEL f1 =====  
SFO1 400.1324710 MHz  
NUC1 1H  
P1 14.50 usec  
SI 65536  
SF 400.1300000 MHz  
WDW EM  
SSB 0  
LB 0.30 Hz  
GB 0  
PC 1.00

9 8 7 6 5 4 3 2 1 ppm

2.04

7.00

4.08

0.89

1.04

2.07

3.07

S-121

— 171.27  
 — 152.55  
 — 148.73  
 — 148.72  
 — 140.58  
 — 137.69  
 — 135.95  
 — 129.37  
 — 128.35  
 — 128.05  
 — 127.71  
 — 124.34  
 — 121.80  
 — 121.10  
 — 119.26  
 — 116.72  
 — 114.83  
 — 114.53

— 66.62  
 — 60.60  
 — 54.83



NAME CNMR-gwg-8-144-1  
 EXPNO 1  
 PROCNO 1  
 Date\_ 20200904  
 Time\_ 13.24  
 INSTRUM spect  
 PROBHD 5 mm PABBO BB/  
 PULPROG zgpg30  
 TD 65536  
 SOLVENT Acetone  
 NS 134  
 DS 0  
 SWH 24038.461 Hz  
 FIDRES 0.366798 Hz  
 AQ 1.3631988 sec  
 RG 196.92  
 DW 20.800 usec  
 DE 6.50 usec  
 TE 297.7 K  
 D1 2.00000000 sec  
 D11 0.03000000 sec  
 TD0 1

===== CHANNEL f1 =====  
 SFO1 100.6228298 MHz  
 NUC1 13C  
 P1 9.70 usec  
 SI 32768  
 SF 100.6127690 MHz  
 WDW EM  
 SSB 0  
 LB 1.00 Hz  
 GB 0  
 PC 1.40

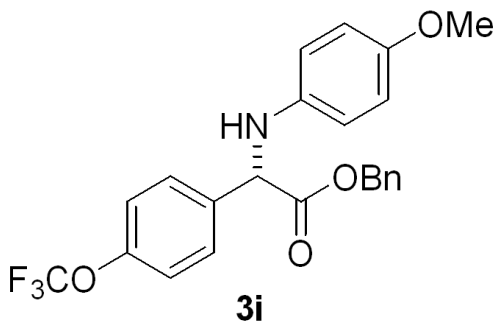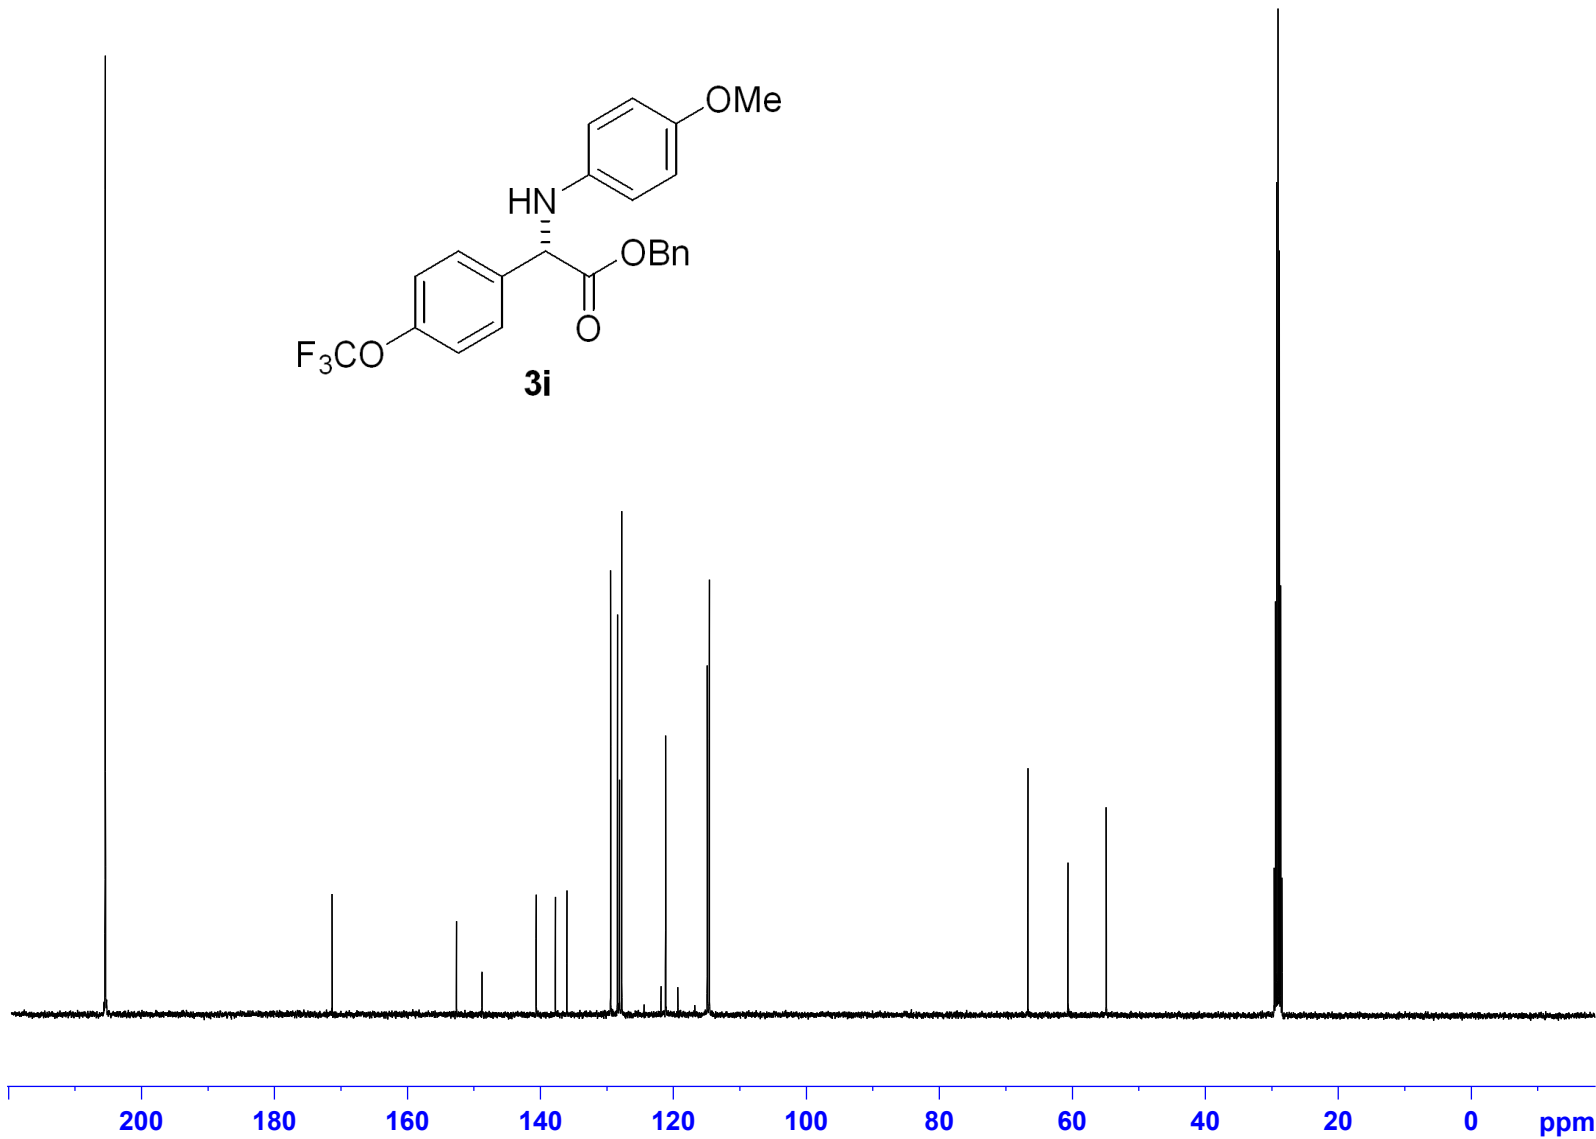



NAME FNMR-gwg-8-144-1  
EXPNO 1  
PROCNO 1  
Date\_ 20200904  
Time\_ 13.31  
INSTRUM spect  
PROBHD 5 mm PABBO BB/  
PULPROG zgpg30  
TD 65536  
SOLVENT Acetone  
NS 3  
DS 0  
SWH 93750.000 Hz  
FIDRES 1.430511 Hz  
AQ 0.3495753 sec  
RG 196.92  
DW 5.333 usec  
DE 6.50 usec  
TE 297.3 K  
D1 2.00000000 sec  
D11 0.03000000 sec  
TD0 1

==== CHANNEL f1 =====  
SFO1 376.4607162 MHz  
NUC1 19F  
P1 14.70 usec  
SI 32768  
SF 376.4983660 MHz  
WDW EM  
SSB 0  
LB 1.00 Hz  
GB 0  
PC 1.40

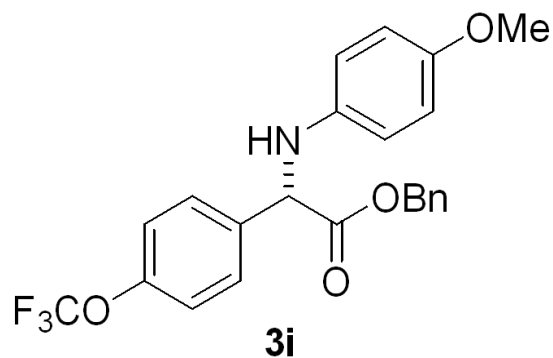

— -58.50

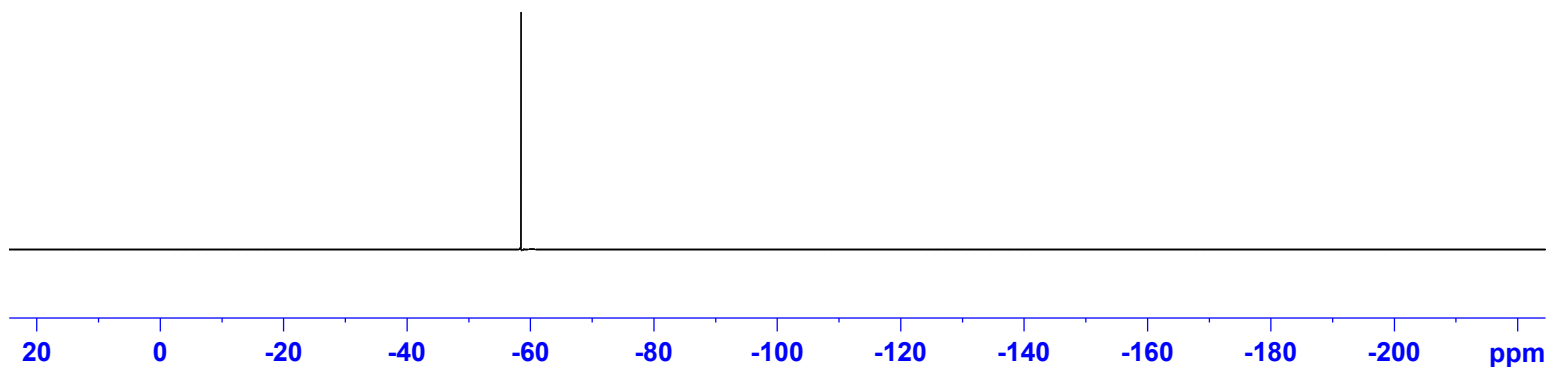

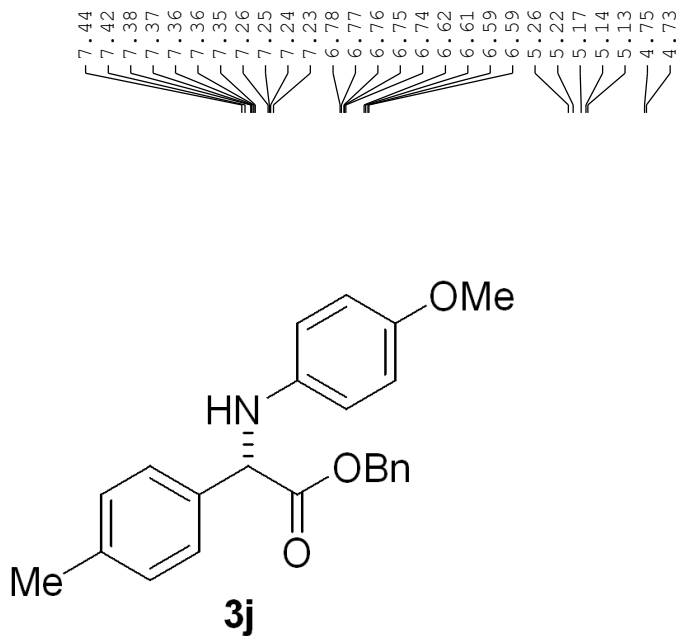

7.44  
7.42  
7.38  
7.37  
7.36  
7.35  
7.26  
7.25  
7.24  
7.23  
6.78  
6.77  
6.76  
6.75  
6.74  
6.62  
6.61  
6.59  
6.59  
5.26  
5.22  
5.17  
5.14  
5.13  
4.75  
4.73

3.74

2.40

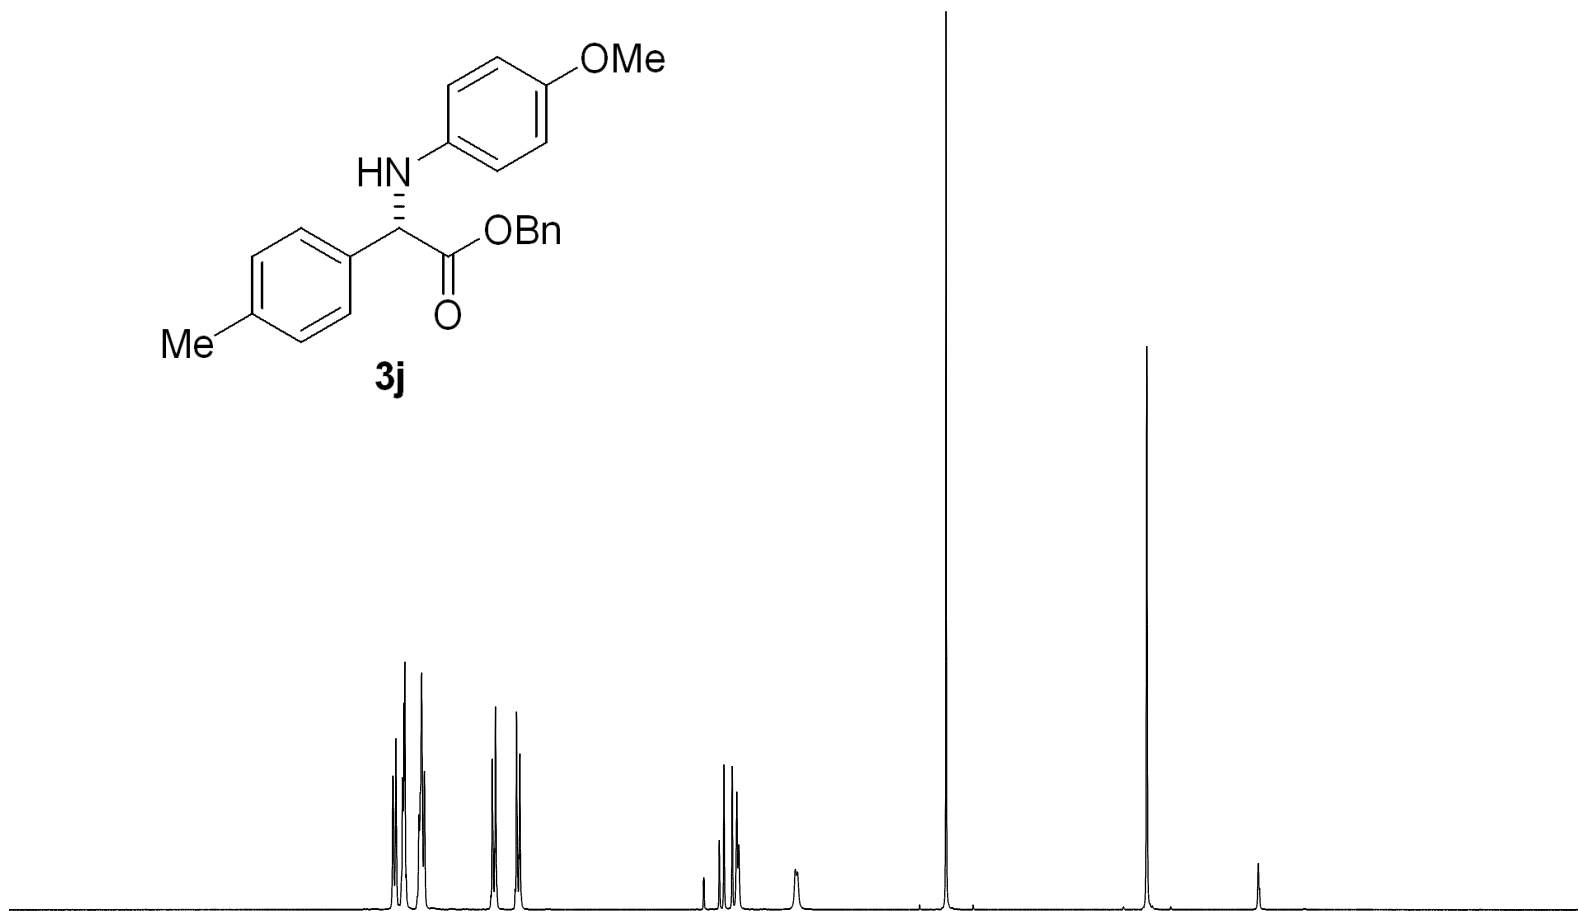

2.10

3.00

4.08

2.09

2.13

3.19

1.02

3.15

3.17

NAME HNMR-gwg-8-175-1  
EXPNO 1  
PROCNO 1  
Date\_ 20200911  
Time\_ 20.51  
INSTRUM spect  
PROBHD 5 mm PABBO BB/  
PULPROG zg30  
TD 65536  
SOLVENT CD2Cl2  
NS 4  
DS 0  
SWH 8012.820 Hz  
FIDRES 0.122266 Hz  
AQ 4.0894966 sec  
RG 34.77  
DW 62.400 usec  
DE 6.50 usec  
TE 296.9 K  
D1 1.00000000 sec  
TD0 1

==== CHANNEL f1 =====  
SFO1 400.1324710 MHz  
NUC1 1H  
P1 14.50 usec  
SI 65536  
SF 400.1300000 MHz  
WDW EM  
SSB 0  
LB 0.30 Hz  
GB 0  
PC 1.00

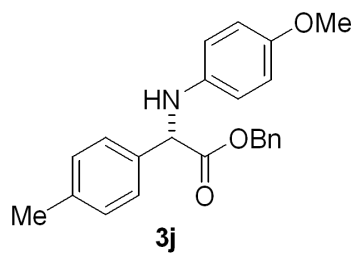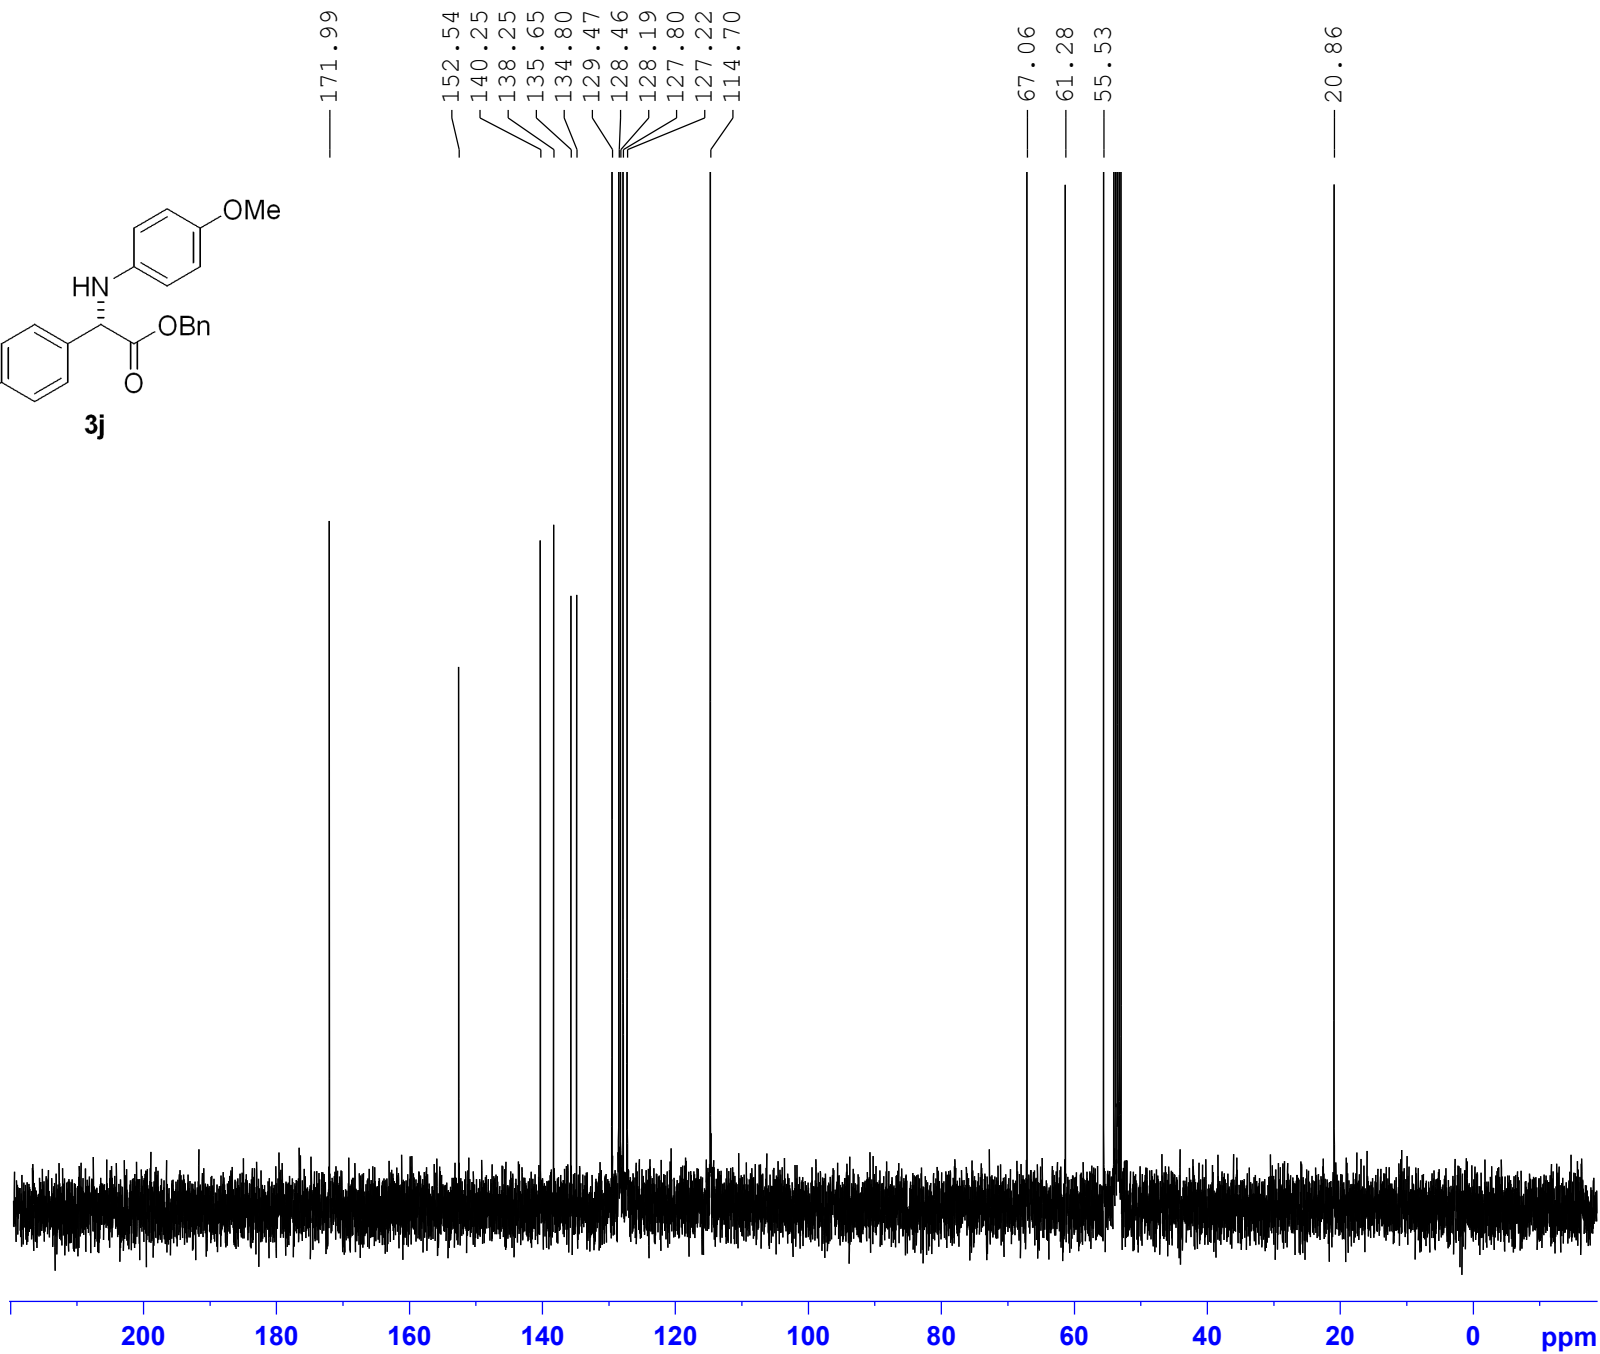

S-125



```

NAME      CNMR-gwg-8-175-1
EXPNO     1
PROCNO    1
Date_     20200911
Time_     20.54
INSTRUM   spect
PROBHD    5 mm PABBO BB/
PULPROG   zgpg30
TD         65536
SOLVENT   CD2Cl2
NS         57
DS         0
SWH        24038.461 Hz
FIDRES     0.366798 Hz
AQ         1.3631988 sec
RG         196.92
DW         20.800 usec
DE         6.50 usec
TE         297.2 K
D1         2.00000000 sec
D11        0.03000000 sec
TD0        1
  
```

```

===== CHANNEL f1 =====
SF01      100.6228298 MHz
NUC1       13C
P1         9.70 usec
SI         32768
SF         100.6127690 MHz
WDW        EM
SSB        0
LB         1.00 Hz
GB         0
PC         1.40
  
```



7.66  
6.74  
6.74  
6.73  
6.72  
6.50  
6.49  
6.48  
6.48  
5.09  
5.08  
4.86  
4.84  
3.76  
3.71

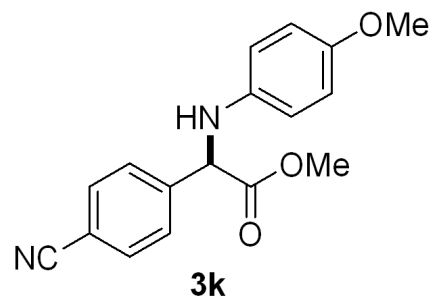

NAME HNMR-lsj-1-9  
EXPNO 1  
PROCNO 1  
Date\_ 20201009  
Time\_ 20.07  
INSTRUM spect  
PROBHD 5 mm PABBO BB/  
PULPROG zg30  
TD 65536  
SOLVENT CDCl3  
NS 4  
DS 0  
SWH 8012.820 Hz  
FIDRES 0.122266 Hz  
AQ 4.0894966 sec  
RG 31.55  
DW 62.400 usec  
DE 6.50 usec  
TE 296.5 K  
D1 1.00000000 sec  
TD0 1

==== CHANNEL f1 =====  
SFO1 400.1324710 MHz  
NUC1 1H  
P1 14.50 usec  
SI 65536  
SF 400.1300000 MHz  
WDW EM  
SSB 0  
LB 0.30 Hz  
GB 0  
PC 1.00

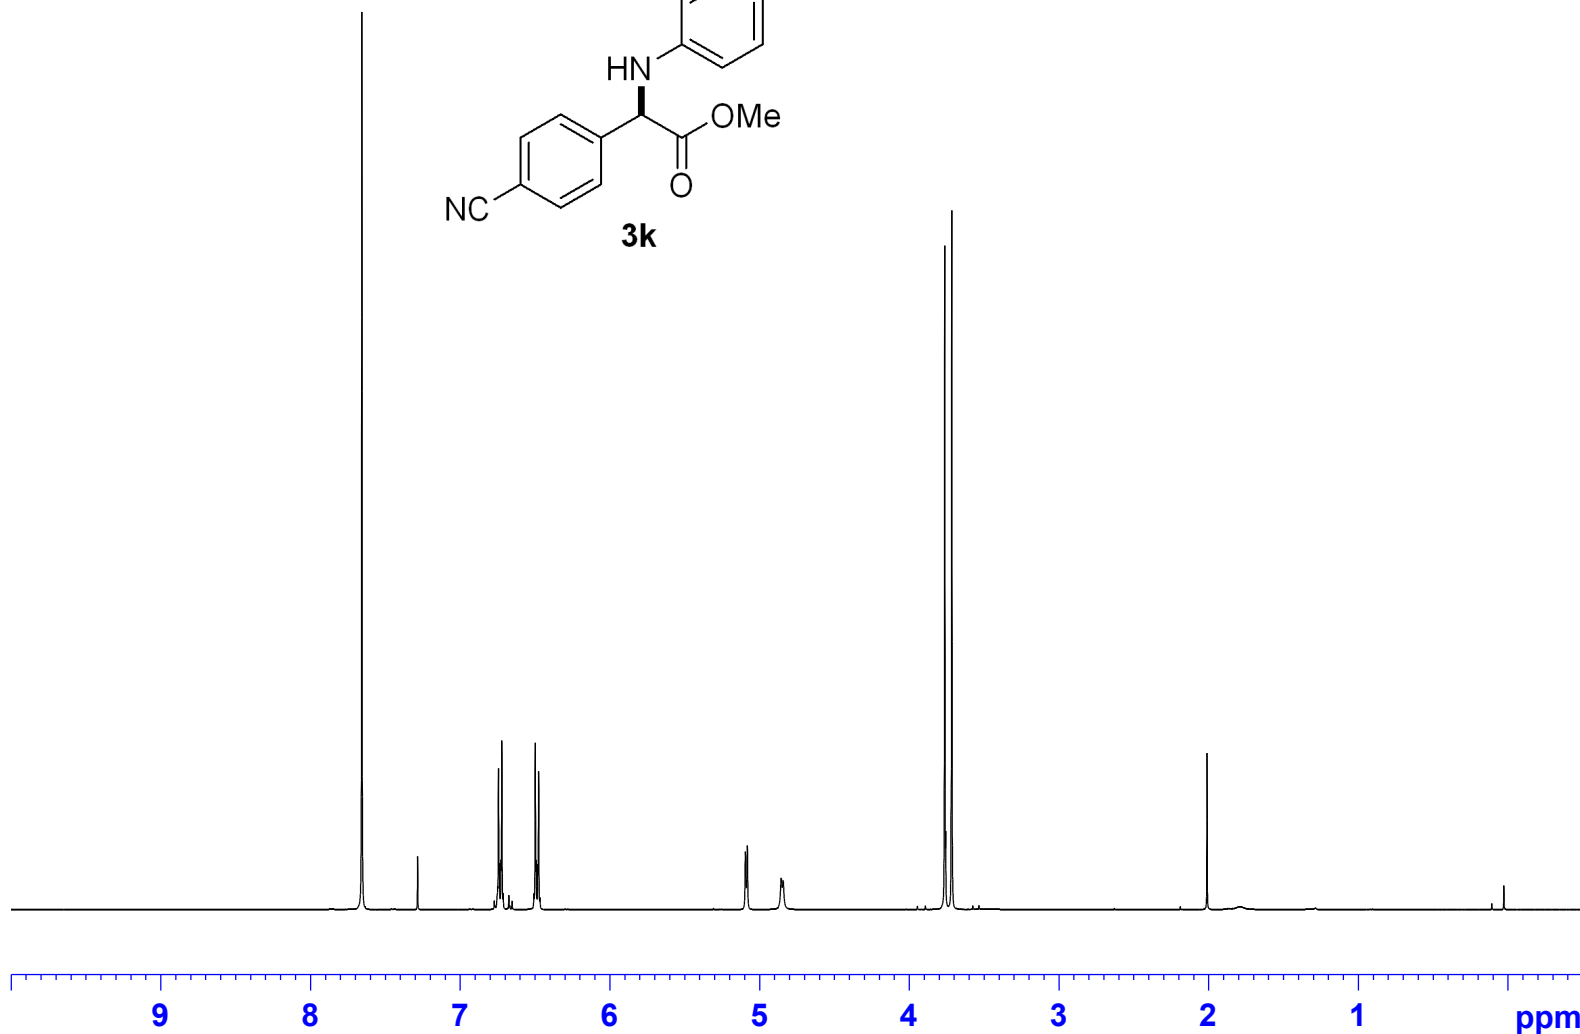

3.95

2.10

2.00

1.00

0.97

3.17

3.18

S-126

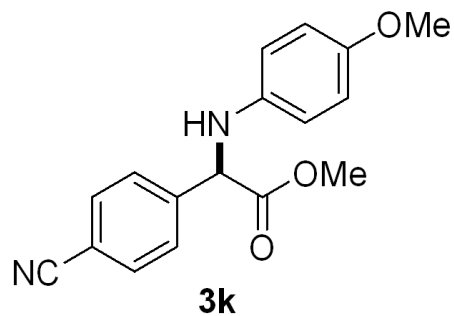

— 171.19  
 — 152.79  
 — 143.43  
 — 139.41  
 — 132.65  
 — 128.14  
 — 118.58  
 — 114.92  
 — 114.79  
 — 112.16

— 61.30  
 — 55.66  
 — 53.19

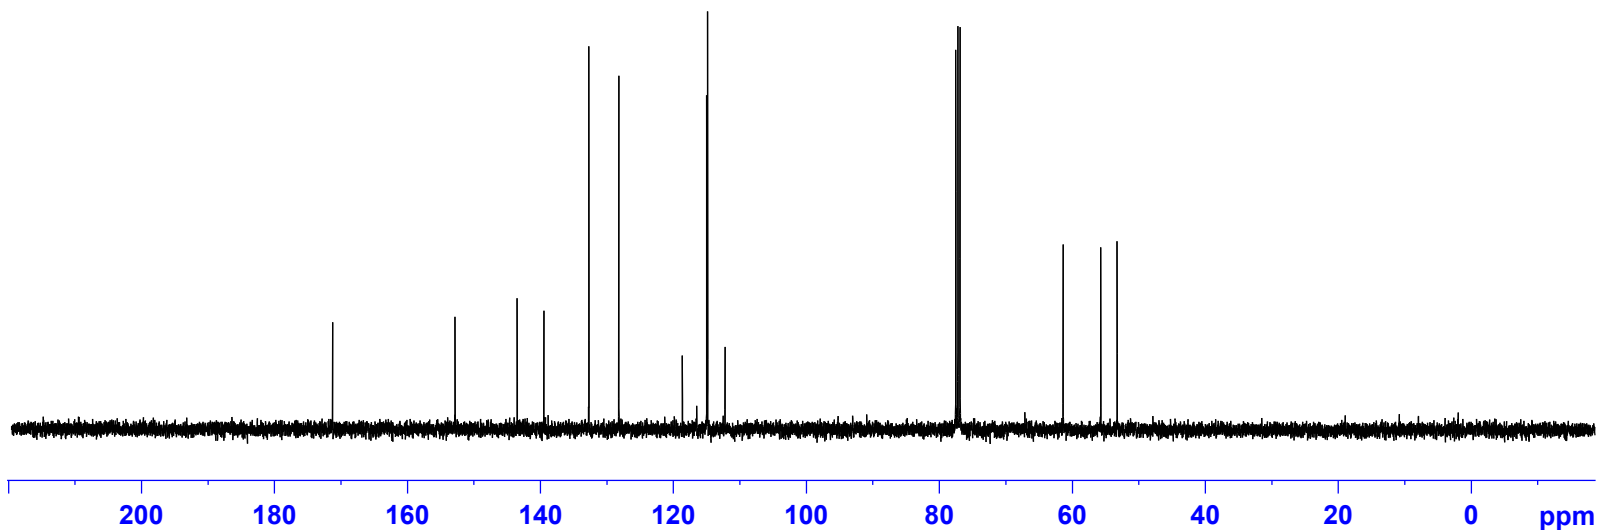

S-127



```

NAME      CNMR-lsj-1-9
EXPNO     1
PROCNO    1
Date_     20201009
Time_     20.11
INSTRUM   spect
PROBHD    5 mm PABBO BB/
PULPROG   zgpg30
TD        65536
SOLVENT   CDC13
NS        10
DS        0
SWH       24038.461 Hz
FIDRES    0.366798 Hz
AQ        1.3631988 sec
RG        196.92
DW        20.800 usec
DE        6.50 usec
TE        296.6 K
D1        2.00000000 sec
D11       0.03000000 sec
TD0       1
  
```

```

===== CHANNEL f1 =====
SFO1     100.6228298 MHz
NUC1     13C
P1       9.70 usec
SI       32768
SF       100.6127690 MHz
WDW      EM
SSB      0
LB       1.00 Hz
GB       0
PC       1.40
  
```



NAME HNMR-1sj-1-10-1  
EXPNO 1  
PROCNO 1  
Date\_ 20201009  
Time\_ 20.15  
INSTRUM spect  
PROBHD 5 mm PABBO BB/  
PULPROG zg30  
TD 65536  
SOLVENT CDCl3  
NS 2  
DS 0  
SWH 8012.820 Hz  
FIDRES 0.122266 Hz  
AQ 4.0894966 sec  
RG 88.84  
DW 62.400 usec  
DE 6.50 usec  
TE 296.3 K  
D1 1.00000000 sec  
TD0 1

==== CHANNEL f1 =====  
SFO1 400.1324710 MHz  
NUC1 1H  
P1 14.50 usec  
SI 65536  
SF 400.1300000 MHz  
WDW EM  
SSB 0  
LB 0.30 Hz  
GB 0  
PC 1.00

8.25  
8.24  
8.24  
8.23  
8.22  
8.22  
7.74  
7.74  
7.73  
7.72  
7.71  
6.76  
6.75  
6.74  
6.73  
6.73  
6.72  
6.51  
6.50  
6.50  
6.49  
6.48  
6.47  
5.15  
5.13  
4.88  
4.87  
3.78  
3.72

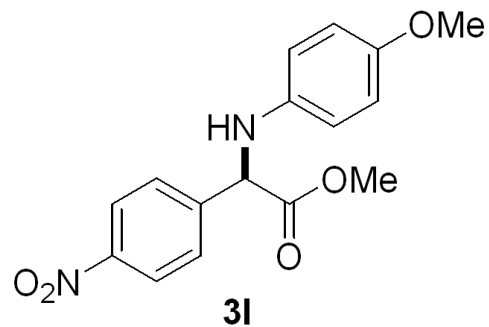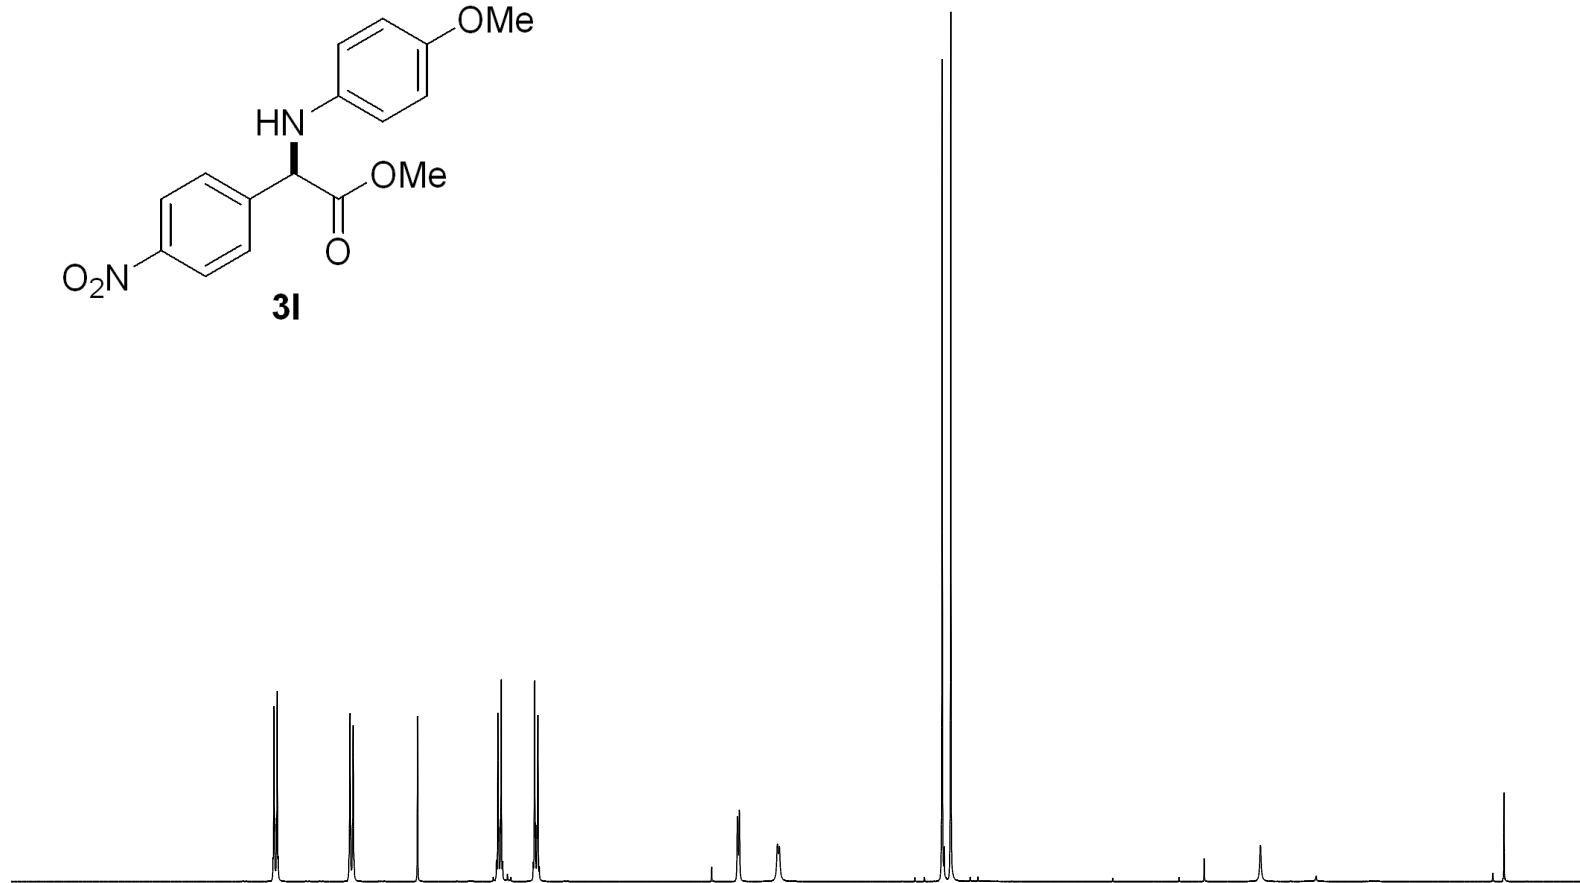

2.00

2.04

2.13

2.05

1.02

0.96

3.10

3.08

S-128





NAME CNMR-lsj-1-10-1  
EXPNO 1  
PROCNO 1  
Date\_ 20201009  
Time\_ 20.17  
INSTRUM spect  
PROBHD 5 mm PABBO BB/  
PULPROG zgpg30  
TD 65536  
SOLVENT CDCl3  
NS 13  
DS 0  
SWH 24038.461 Hz  
FIDRES 0.366798 Hz  
AQ 1.3631988 sec  
RG 196.92  
DW 20.800 usec  
DE 6.50 usec  
TE 296.6 K  
D1 2.00000000 sec  
D11 0.03000000 sec  
TD0 1

==== CHANNEL f1 =====  
SF01 100.6228298 MHz  
NUC1 13C  
P1 9.70 usec  
SI 32768  
SF 100.6127690 MHz  
WDW EM  
SSB 0  
LB 1.00 Hz  
GB 0  
PC 1.40

— 171.02  
— 152.85  
— 147.90  
— 145.39  
— 139.30  
— 128.29  
— 124.06  
— 114.94  
— 114.80  
— 61.16  
— 55.67  
— 53.27

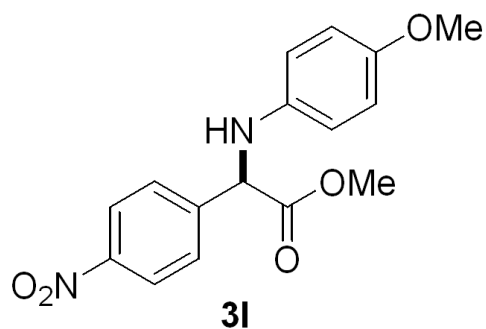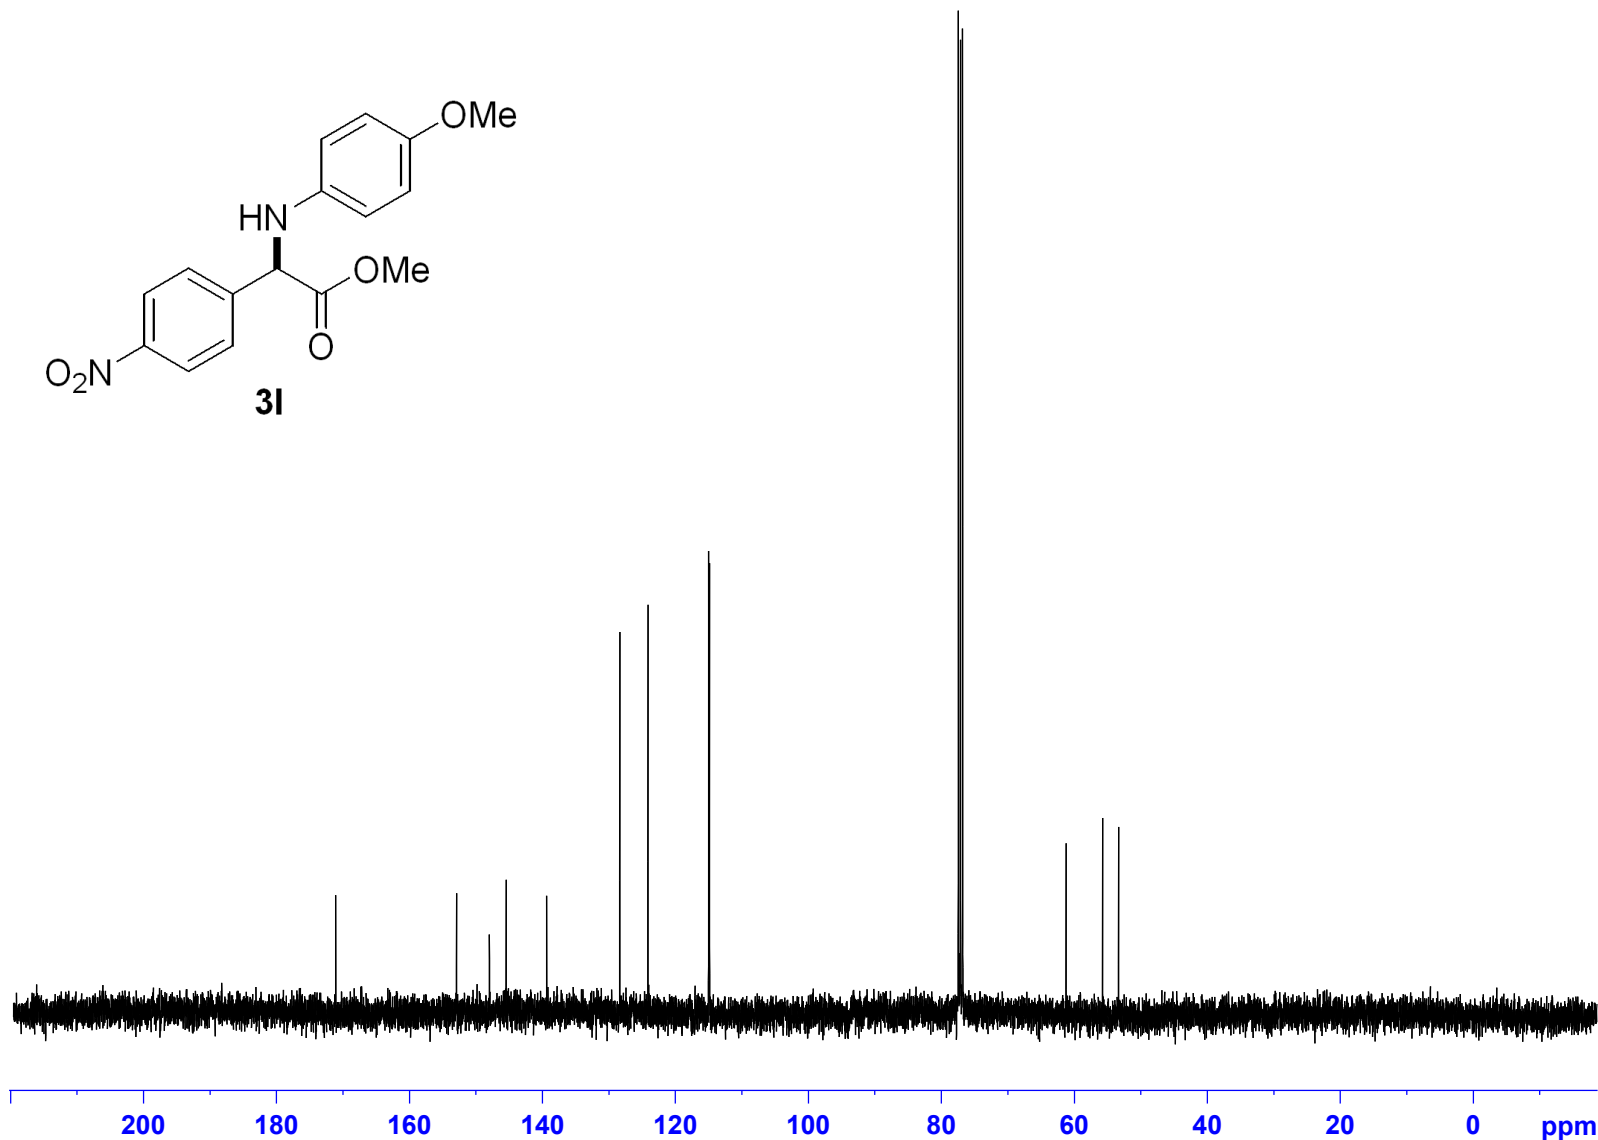



NAME HNMR-lsj-1-14-1  
EXPNO 1  
PROCNO 1  
Date\_ 20201010  
Time\_ 19.16  
INSTRUM spect  
PROBHD 5 mm PABBO BB/  
PULPROG zg30  
TD 65536  
SOLVENT Acetone  
NS 4  
DS 0  
SWH 8012.820 Hz  
FIDRES 0.122266 Hz  
AQ 4.0894966 sec  
RG 27.78  
DW 62.400 usec  
DE 6.50 usec  
TE 297.5 K  
D1 1.00000000 sec  
TD0 1

==== CHANNEL f1 =====  
SFO1 400.1324710 MHz  
NUC1 1H  
P1 14.50 usec  
SI 65536  
SF 400.1300000 MHz  
WDW EM  
SSB 0  
LB 0.30 Hz  
GB 0  
PC 1.00

8.02  
8.01  
8.00  
7.99  
7.72  
7.70  
7.33  
7.32  
7.31  
7.31  
7.30  
7.29  
7.27  
7.26  
7.25  
7.24  
7.23  
6.74  
6.73  
6.71  
6.71  
6.70  
6.69  
5.48  
5.46  
5.38  
5.37  
5.36  
5.23  
5.20  
5.18  
5.15  
3.88  
3.66

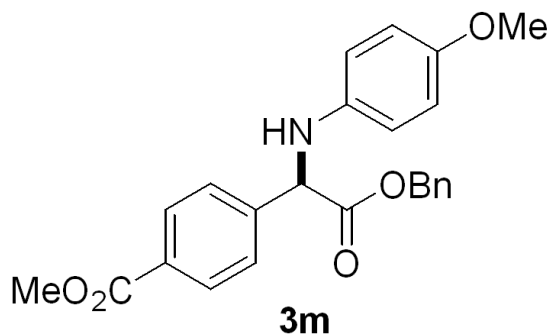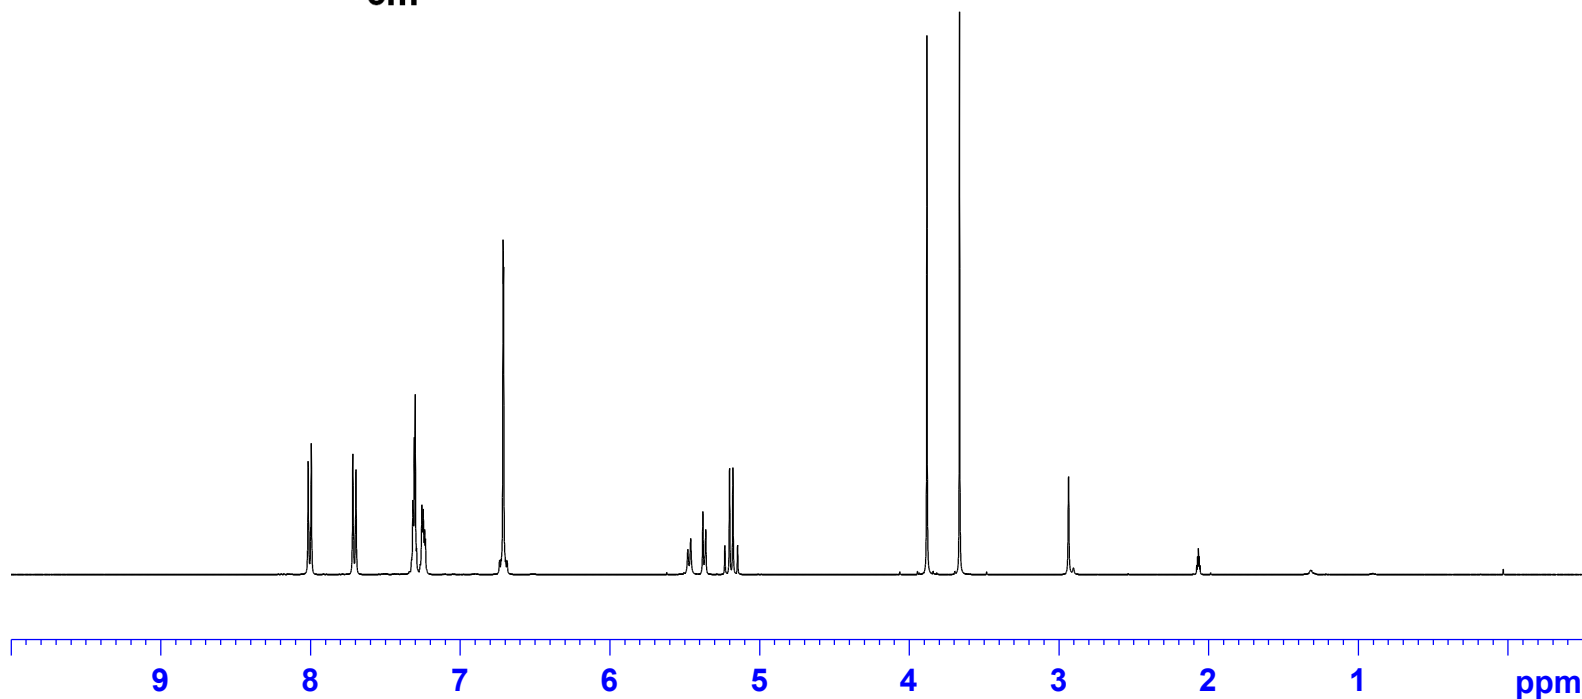



NAME CNMR-lsj-1-14-1  
EXPNO 1  
PROCNO 1  
Date\_ 20201010  
Time\_ 19.26  
INSTRUM spect  
PROBHD 5 mm PABBO BB/  
PULPROG zgpg30  
TD 65536  
SOLVENT Acetone  
NS 121  
DS 0  
SWH 24038.461 Hz  
FIDRES 0.366798 Hz  
AQ 1.3631988 sec  
RG 196.92  
DW 20.800 usec  
DE 6.50 usec  
TE 298.0 K  
D1 2.00000000 sec  
D11 0.03000000 sec  
TD0 1

==== CHANNEL f1 =====  
SF01 100.6228298 MHz  
NUC1 13C  
P1 9.70 usec  
SI 32768  
SF 100.6127690 MHz  
WDW EM  
SSB 0  
LB 1.00 Hz  
GB 0  
PC 1.40

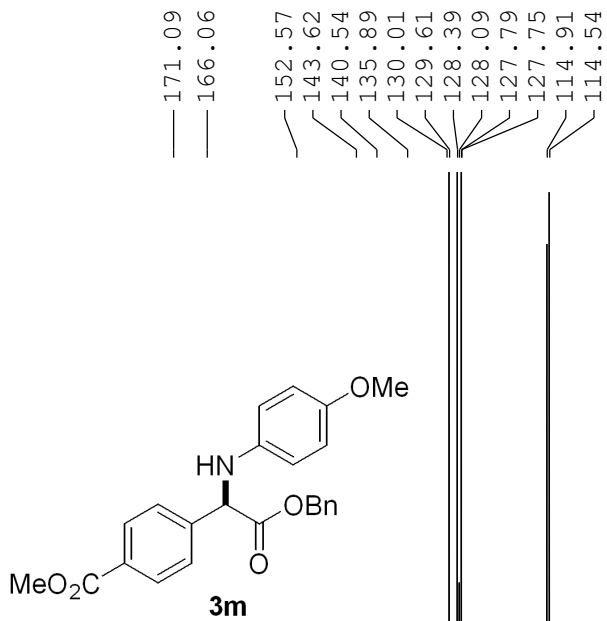

- 171.09
- 166.06
- 152.57
- 143.62
- 140.54
- 135.89
- 130.01
- 129.61
- 128.39
- 128.09
- 127.79
- 127.75
- 114.91
- 114.54
- 66.76
- 61.15
- 54.86
- 51.53

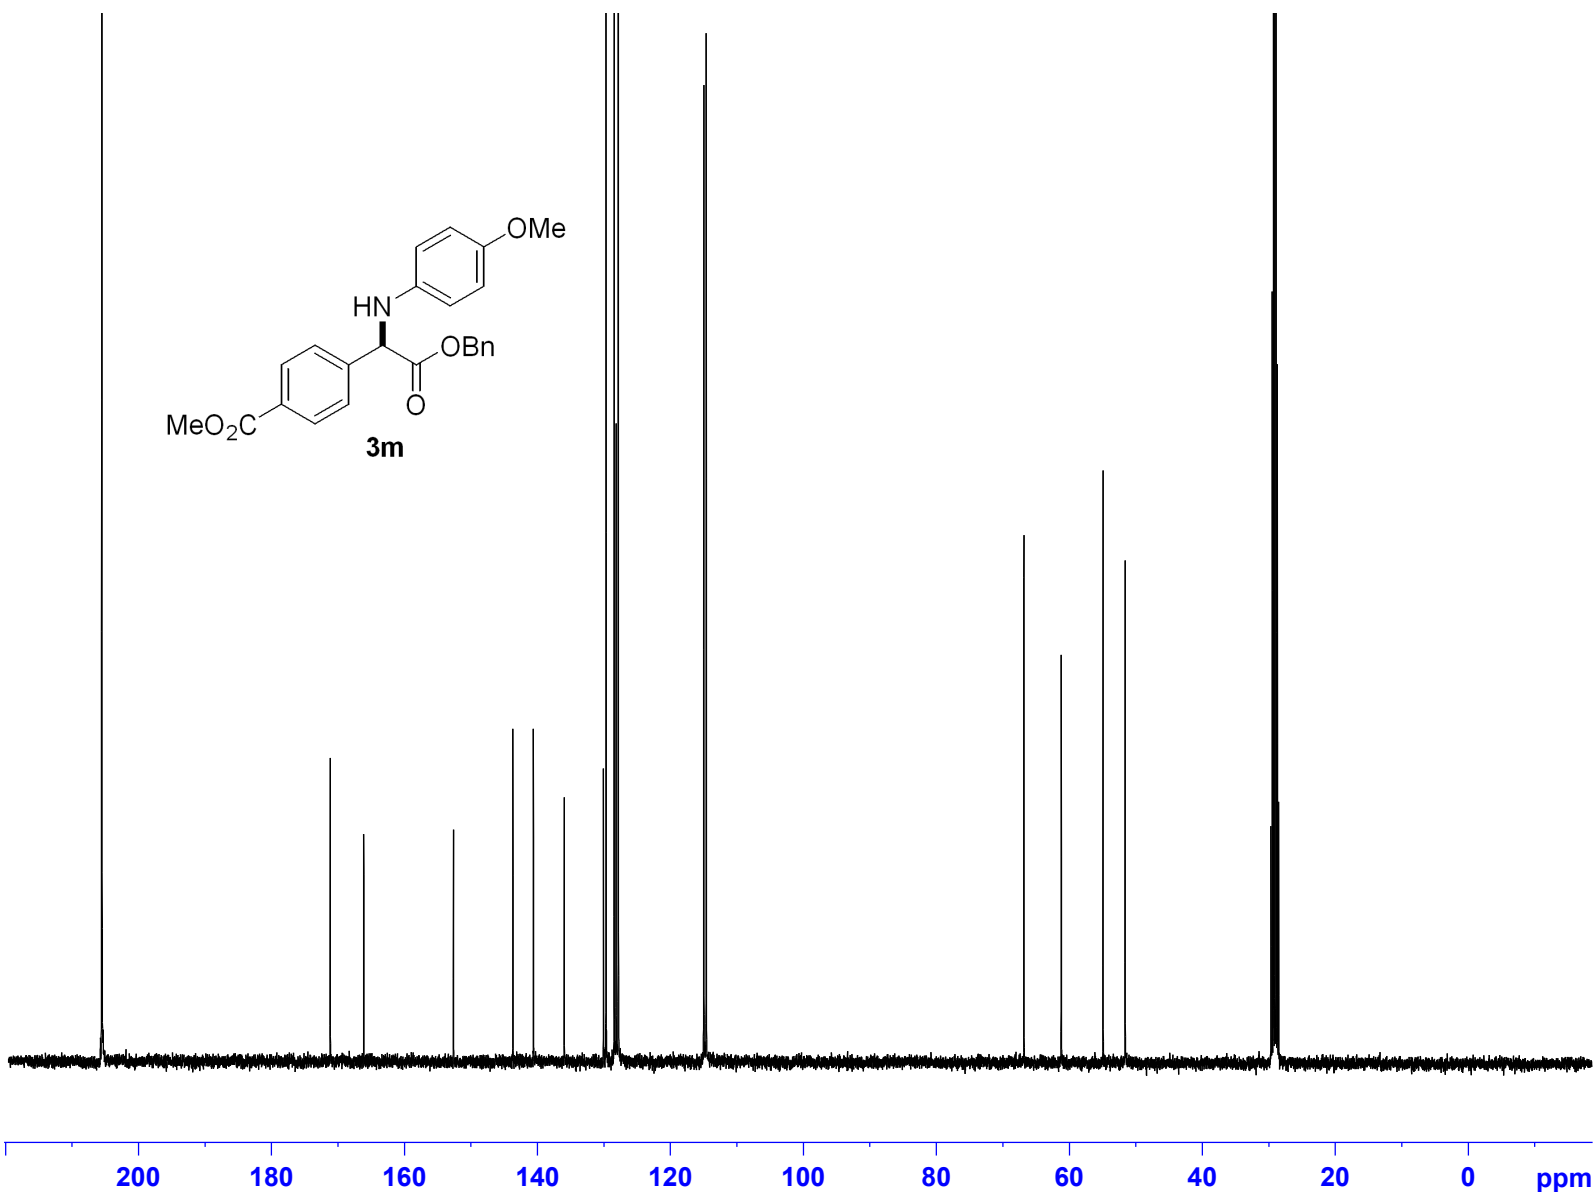



NAME HNMR-gwg-8-p-Ac-product  
EXPNO 1  
PROCNO 1  
Date\_ 20200911  
Time\_ 22.13  
INSTRUM spect  
PROBHD 5 mm PABBO BB-  
PULPROG zg30  
TD 65536  
SOLVENT CD2Cl2  
NS 2  
DS 0  
SWH 8223.685 Hz  
FIDRES 0.125483 Hz  
AQ 3.9846387 sec  
RG 287  
DW 60.800 usec  
DE 6.00 usec  
TE 295.4 K  
D1 1.00000000 sec  
TD0 1

===== CHANNEL f1 =====  
NUC1 1H  
P1 15.80 usec  
PL1 -1.00 dB  
PLW 12.17476940 W  
SF01 400.1324710 MHz  
SI 32768  
SF 400.1300054 MHz  
WDW EM  
SSB 0  
LB 0.30 Hz  
GB 0  
PC 1.00

7.97  
7.96  
7.95  
7.94  
7.94  
7.64  
7.62  
7.34  
7.33  
7.32  
7.23  
7.22  
7.22  
7.21  
7.21  
7.21  
7.20  
6.73  
6.71  
6.56  
6.54  
5.23  
5.20  
5.19  
5.16  
5.13  
4.85  
4.83

3.70

2.59

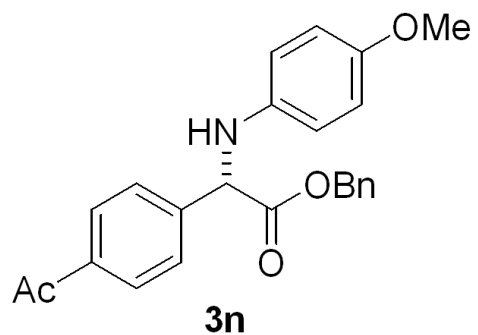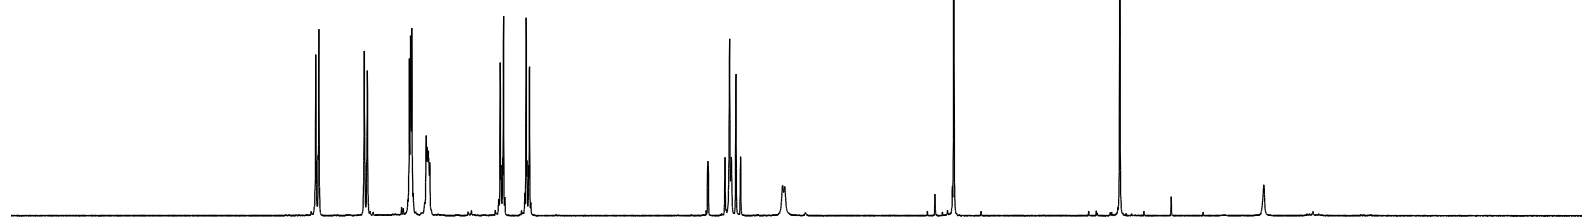

9

2.05

2.05

3.07

2.03

2.11

2.09

3.11

0.99

3.11

3.00

ppm

S-132



NAME CNMR-gwg-8-p-Ac-product  
EXPNO 1  
PROCNO 1  
Date\_ 20200911  
Time 22.18  
INSTRUM spect  
PROBHD 5 mm PABBO BB-  
PULPROG zgpg30  
TD 65536  
SOLVENT CD2Cl2  
NS 33  
DS 0  
SWH 24038.461 Hz  
FIDRES 0.366798 Hz  
AQ 1.3631988 sec  
RG 90.5  
DW 20.800 usec  
DE 6.00 usec  
TE 295.8 K  
D1 2.0000000 sec  
D11 0.0300000 sec  
TD0 1

=====  
CHANNEL f1  
NUC1 13C  
P1 8.60 usec  
PL1 -3.00 dB  
PL1W 60.64365387 W  
SFO1 100.6228298 MHz

=====  
CHANNEL f2  
CPDPRG2 waltz16  
NUC2 1H  
PCPD2 80.00 usec  
PL2 -1.00 dB  
PL12 14.39 dB  
PL13 18.00 dB  
PL2W 12.17476940 W  
PL12W 0.35193357 W  
PL13W 0.15327126 W  
SFO2 400.1316005 MHz  
SI 32768  
SF 100.6128330 MHz  
WDW EM  
SSB 0  
LB 1.00 Hz  
GB 0  
PC 1.40

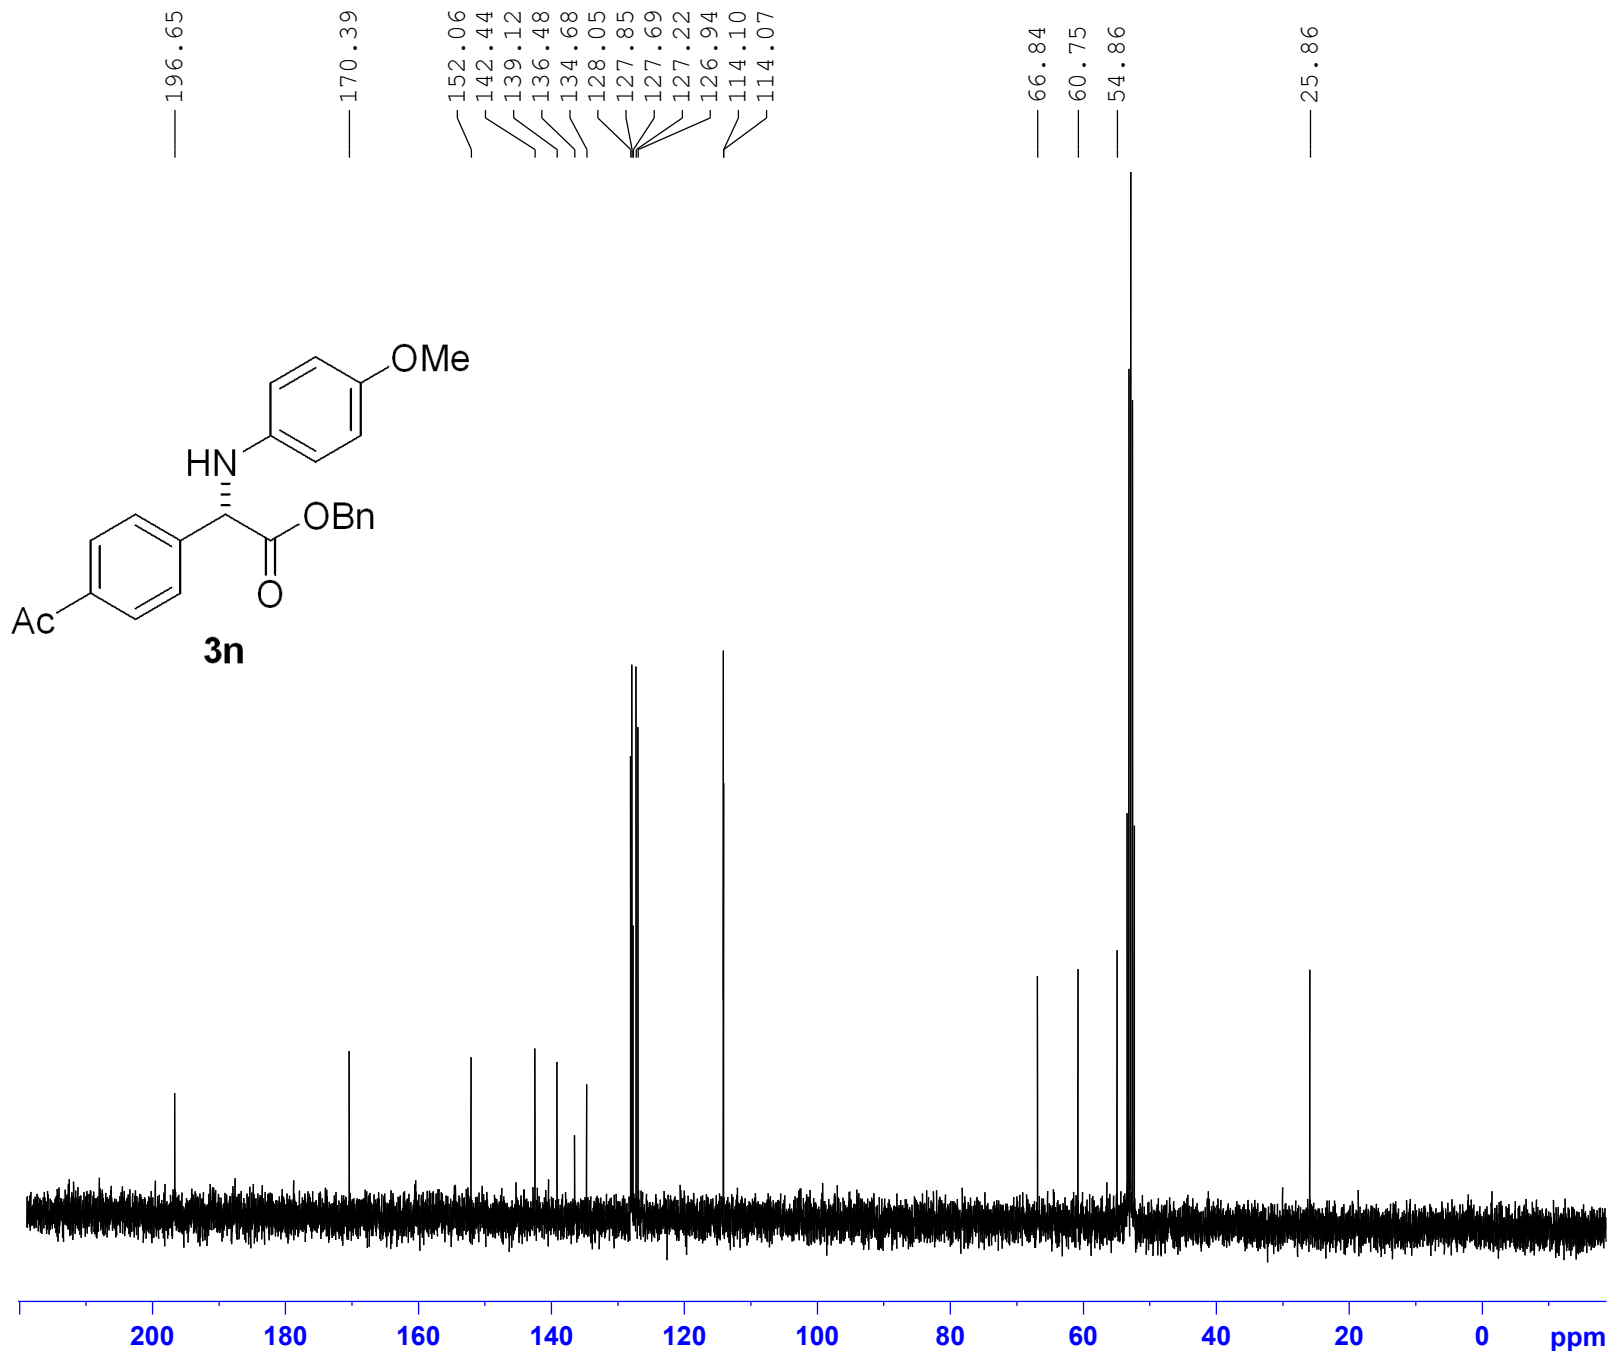



NAME HNMR-gwg-8-186-1  
EXPNO 1  
PROCNO 1  
Date\_ 20200925  
Time\_ 17.11  
INSTRUM spect  
PROBHD 5 mm PABBO BB/  
PULPROG zg30  
TD 65536  
SOLVENT CD2Cl2  
NS 2  
DS 0  
SWH 8012.820 Hz  
FIDRES 0.122266 Hz  
AQ 4.0894966 sec  
RG 31.55  
DW 62.400 usec  
DE 6.50 usec  
TE 296.6 K  
D1 1.00000000 sec  
TD0 1

==== CHANNEL f1 =====  
SFO1 400.1324710 MHz  
NUC1 1H  
P1 14.50 usec  
SI 65536  
SF 400.1300000 MHz  
WDW EM  
SSB 0  
LB 0.30 Hz  
GB 0  
PC 1.00

7.40  
7.40  
7.39  
7.38  
7.38  
7.37  
7.37  
7.36  
7.36  
7.35  
7.35  
7.34  
7.26  
7.25  
7.24  
7.24  
7.23  
7.22  
7.21  
7.19  
7.18  
7.17  
7.17  
7.16  
7.16  
6.80  
6.79  
6.78  
6.77  
6.77  
6.76  
6.66  
6.66  
6.65  
6.65  
6.64  
6.64  
6.63  
6.62  
5.53  
5.27  
5.24  
5.22  
5.22  
4.81  
3.74

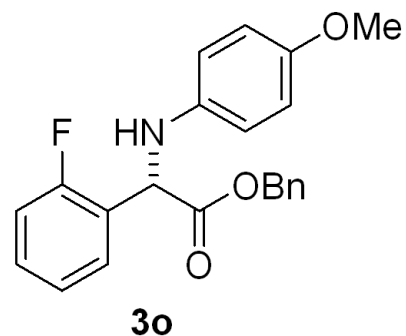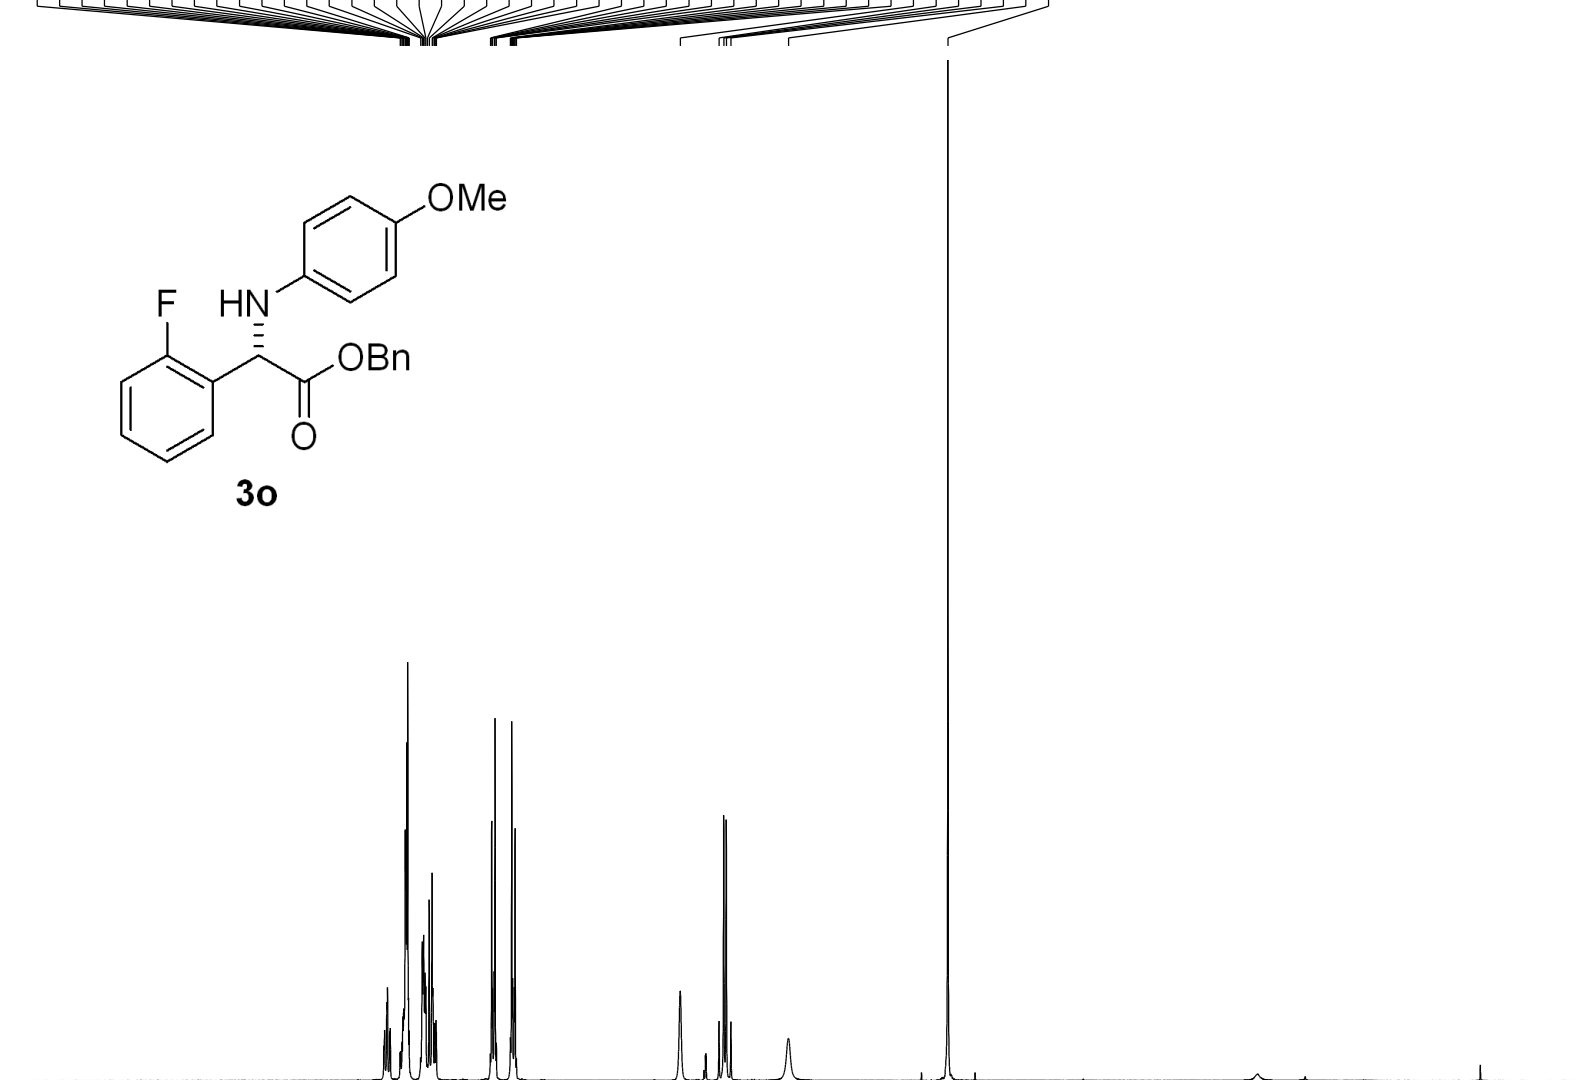

1.03  
3.93  
4.00  
2.05  
2.09  
1.02  
2.07  
0.99  
3.08



NAME CNMR-gwg-8-186-1  
EXPNO 1  
PROCNO 1  
Date\_ 20200925  
Time\_ 17.14  
INSTRUM spect  
PROBHD 5 mm PABBO BB/  
PULPROG zgpg30  
TD 65536  
SOLVENT CD2Cl2  
NS 16  
DS 0  
SWH 24038.461 Hz  
FIDRES 0.366798 Hz  
AQ 1.3631988 sec  
RG 196.92  
DW 20.800 usec  
DE 6.50 usec  
TE 296.7 K  
D1 2.00000000 sec  
D11 0.03000000 sec  
TD0 1

==== CHANNEL f1 =====  
SF01 100.6228298 MHz  
NUC1 13C  
P1 9.70 usec  
SI 32768  
SF 100.6127690 MHz  
WDW EM  
SSB 0  
LB 1.00 Hz  
GB 0  
PC 1.40

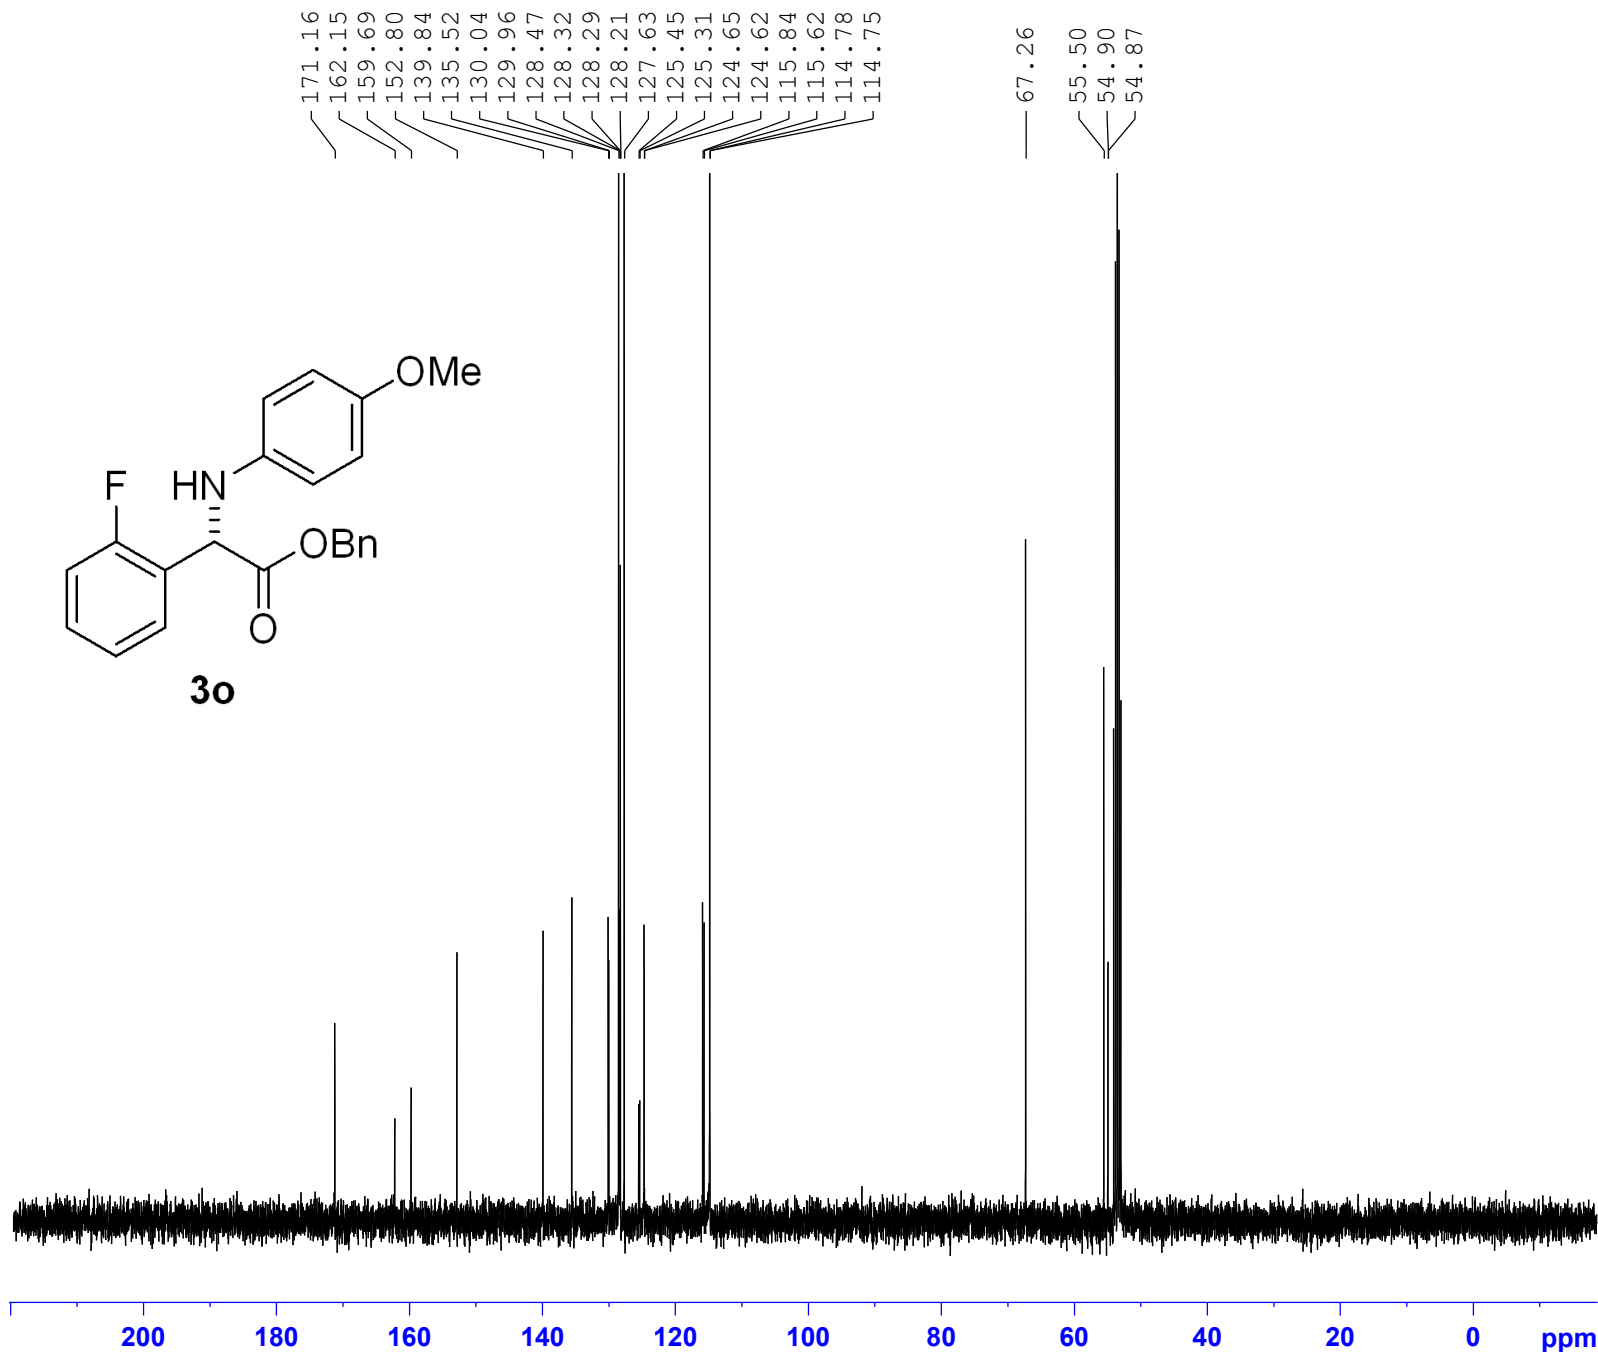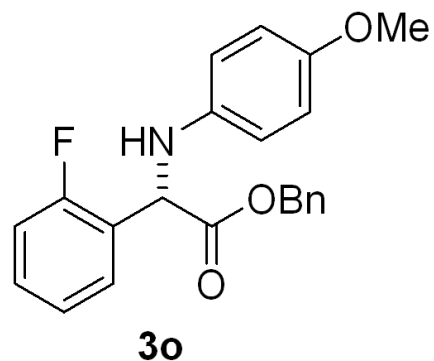

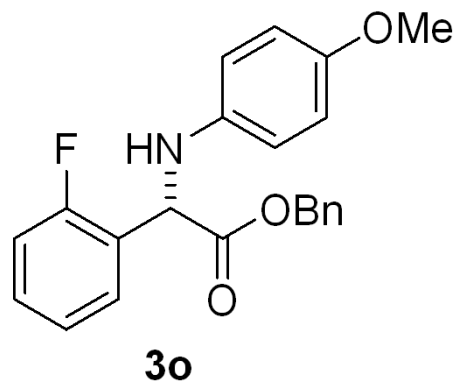

— -118.75

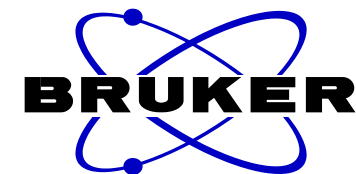

```

NAME      FNMN-gwg-8-186-1
EXPNO     1
PROCNO    1
Date_     20200925
Time      17.17
INSTRUM   spect
PROBHD    5 mm PABBO BB/
PULPROG   zgpg30
TD         65536
SOLVENT   CD2C12
NS         2
DS         0
SWH        93750.000 Hz
FIDRES     1.430511 Hz
AQ         0.3495753 sec
RG         196.92
DW         5.333 usec
DE         6.50 usec
TE         296.7 K
D1         2.00000000 sec
D11        0.03000000 sec
TD0        1
  
```

```

===== CHANNEL f1 =====
SFO1      376.4607162 MHz
NUC1       19F
P1         14.70 usec
SI         32768
SF         376.4983660 MHz
WDW        EM
SSB        0
LB         1.00 Hz
GB         0
PC         1.40
  
```

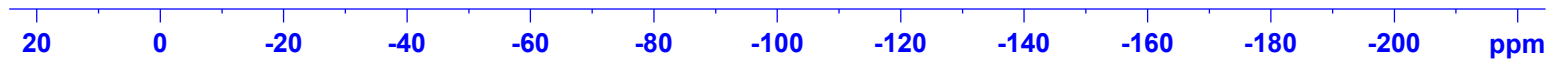



7.77  
7.76  
7.76  
7.58  
7.56  
7.51  
7.51  
7.51  
7.50  
7.49  
7.49  
7.49  
7.35  
7.33  
7.31  
6.74  
6.73  
6.72  
6.71  
6.70  
6.69  
6.68  
6.67  
5.44  
5.42  
5.23  
5.21

3.70  
3.67

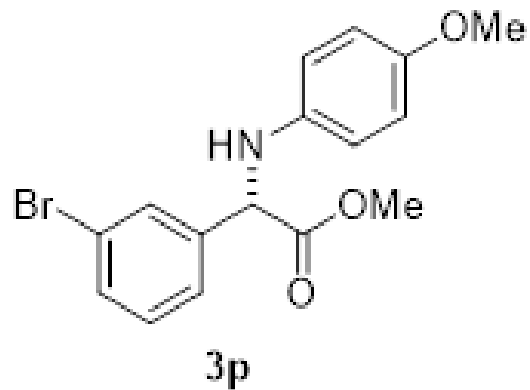

```

NAME      HNMR-gwg-8-151-1
EXPNO     1
PROCNO    1
Date_     20200906
Time      15.50
INSTRUM   spect
PROBHD    5 mm PABBO BB/
PULPROG   zg30
TD        65536
SOLVENT   Acetone
NS        4
DS        0
SWH       8012.820 Hz
FIDRES    0.122266 Hz
AQ        4.0894966 sec
RG        34.77
DW        62.400 usec
DE        6.50 usec
TE        296.7 K
D1        1.00000000 sec
TD0       1
  
```

```

===== CHANNEL f1 =====
SFO1     400.1324710 MHz
NUC1     1H
P1       14.50 usec
SI       65536
SF       400.1300000 MHz
WDW      EM
SSB      0
LB       0.30 Hz
GB       0
PC       1.00
  
```

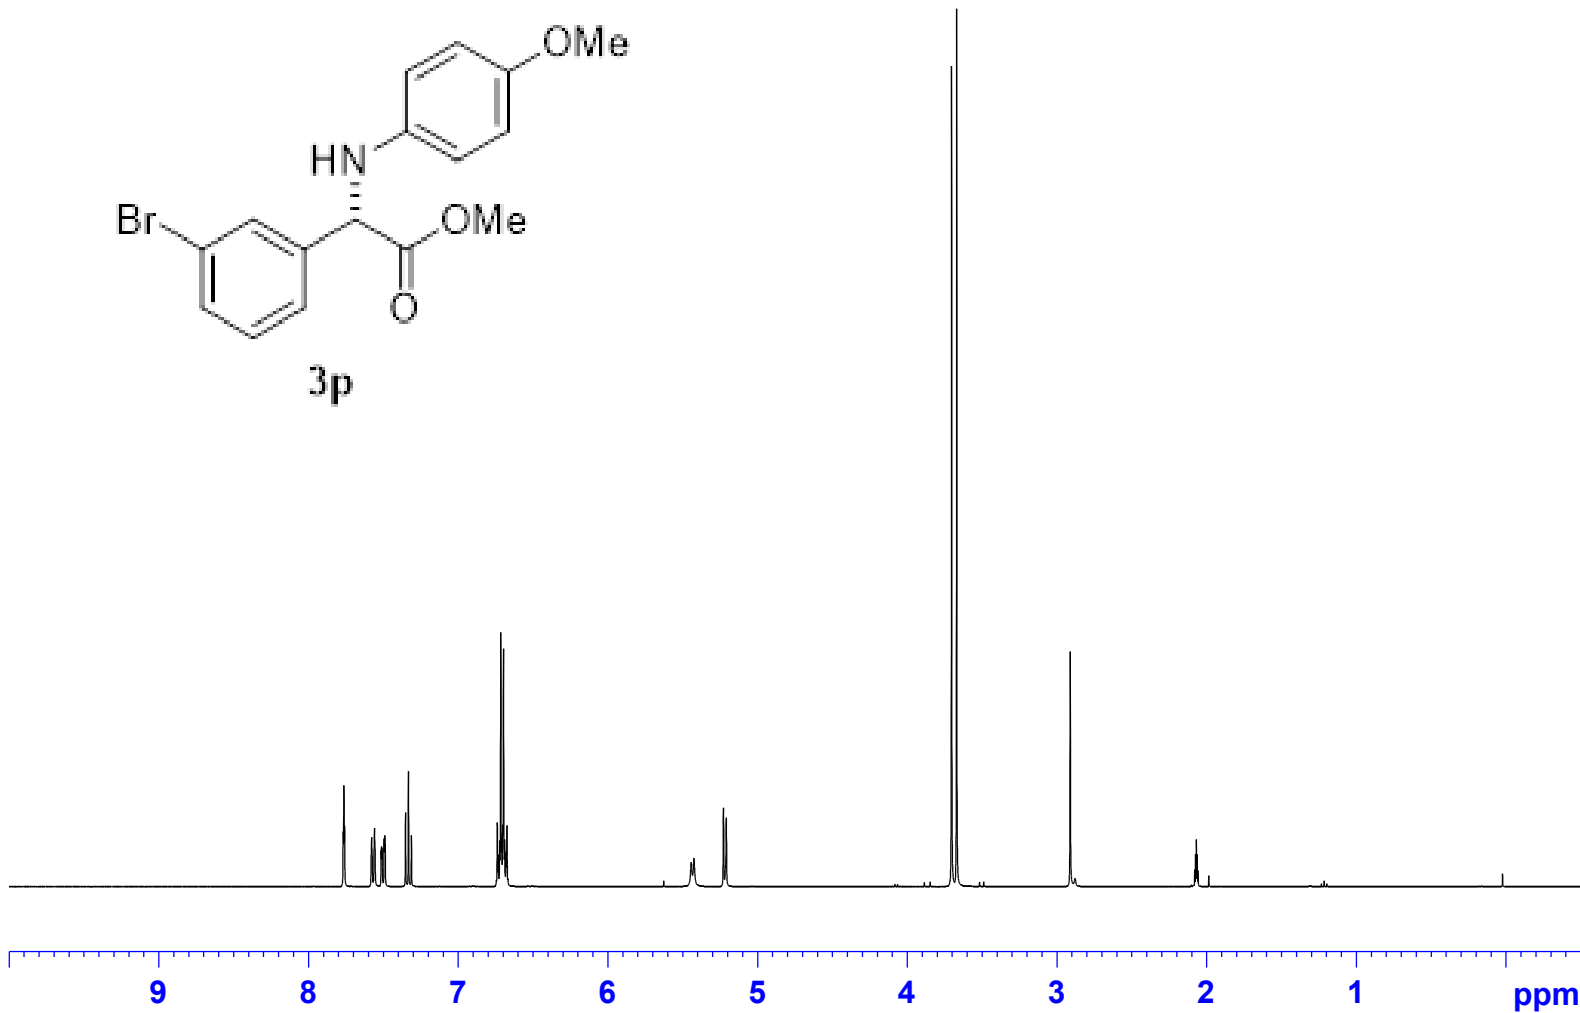

0.96  
0.98  
0.95  
0.99  
3.97

0.85  
1.00

2.94  
2.99



NAME CNMR-gwg-8-151-1  
EXPNO 1  
PROCNO 1  
Date\_ 20200906  
Time\_ 15.52  
INSTRUM spect  
PROBHD 5 mm PABBO BB/  
PULPROG zgpg30  
TD 65536  
SOLVENT Acetone  
NS 12  
DS 0  
SWH 24038.461 Hz  
FIDRES 0.366798 Hz  
AQ 1.3631988 sec  
RG 196.92  
DW 20.800 usec  
DE 6.50 usec  
TE 297.0 K  
D1 2.00000000 sec  
D11 0.03000000 sec  
TD0 1

==== CHANNEL f1 =====  
SF01 100.6228298 MHz  
NUC1 13C  
P1 9.70 usec  
SI 32768  
SF 100.6127690 MHz  
WDW EM  
SSB 0  
LB 1.00 Hz  
GB 0  
PC 1.40

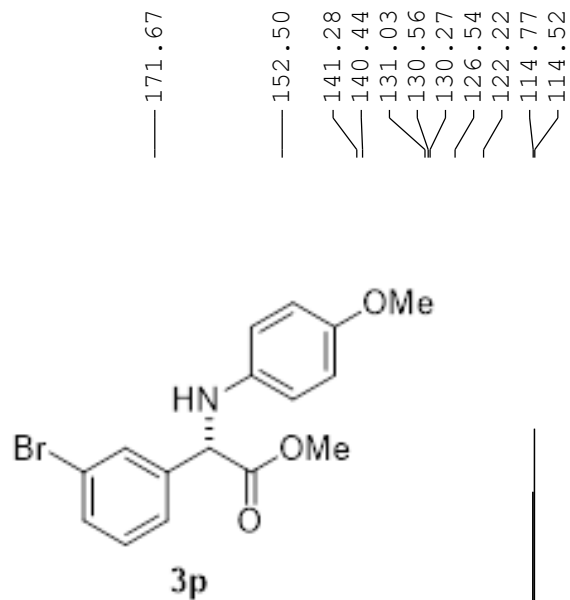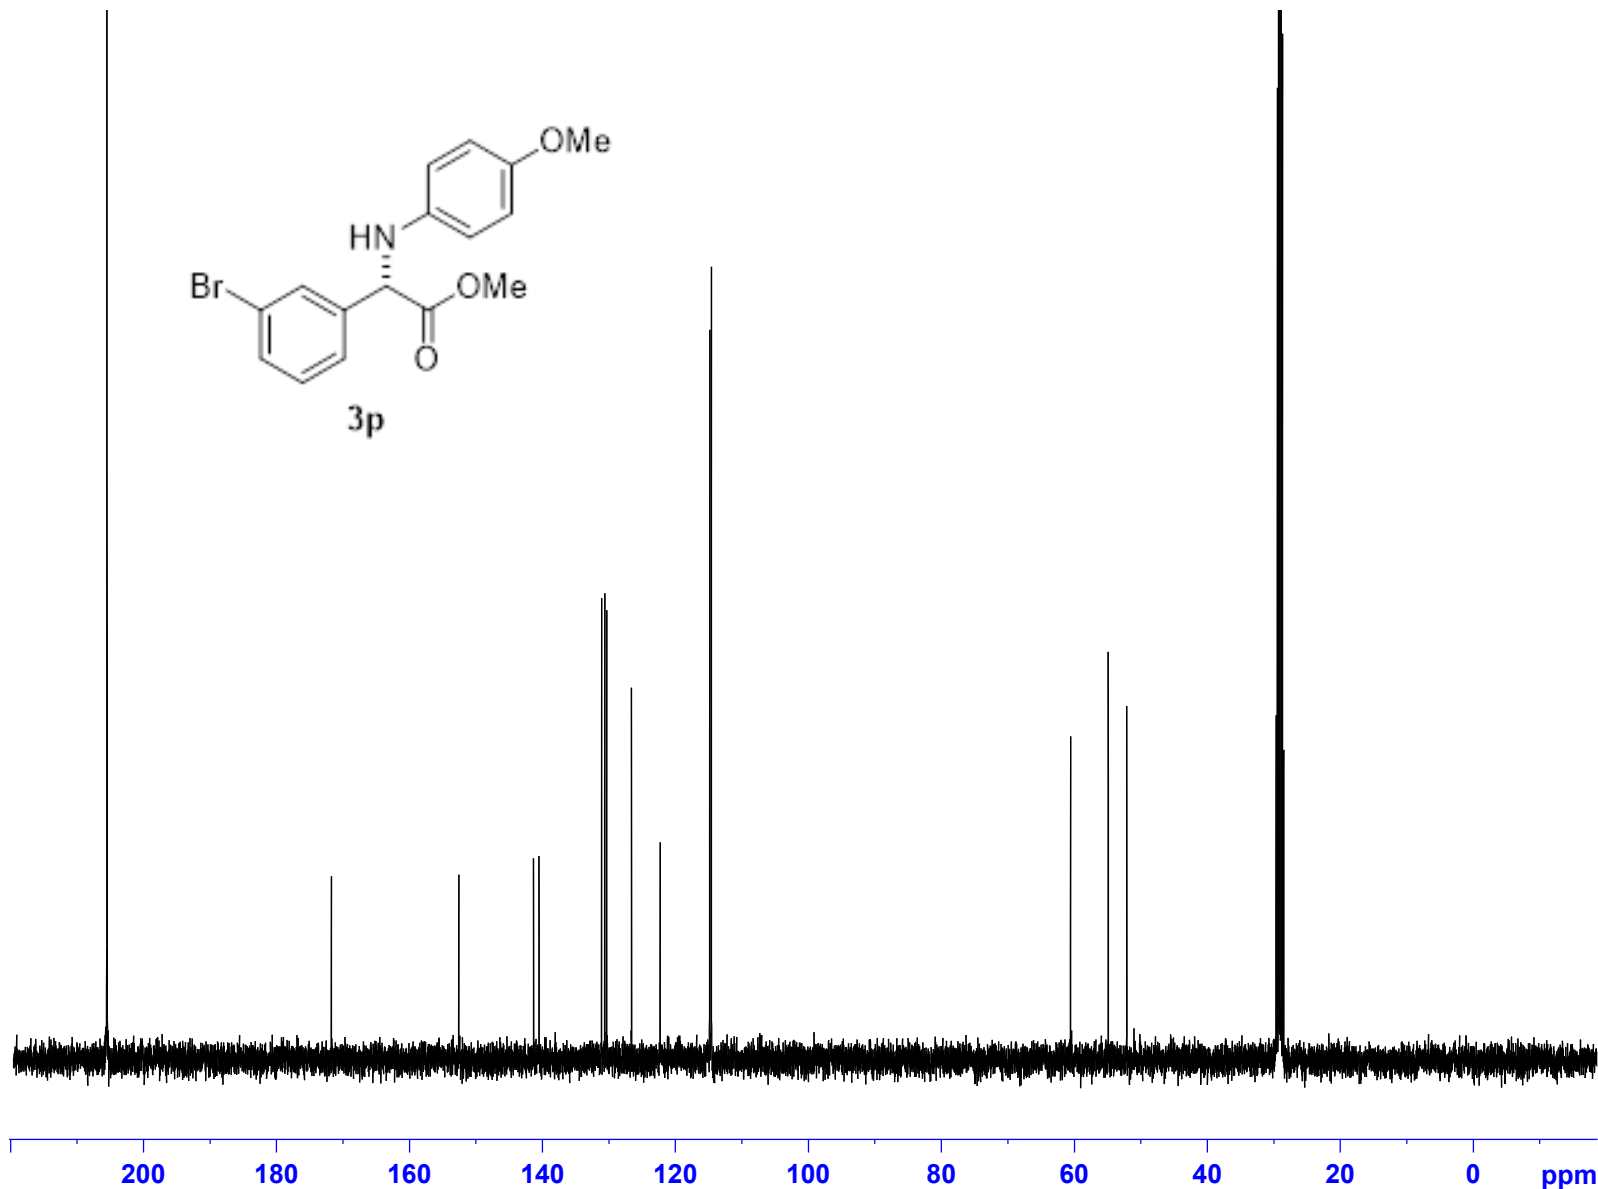



NAME HNMR-gwg-9-14-1  
EXPNO 1  
PROCNO 1  
Date\_ 20201001  
Time\_ 19.22  
INSTRUM spect  
PROBHD 5 mm PABBO BB/  
PULPROG zg30  
TD 65536  
SOLVENT CD2Cl2  
NS 4  
DS 0  
SWH 8012.820 Hz  
FIDRES 0.122266 Hz  
AQ 4.0894966 sec  
RG 34.77  
DW 62.400 usec  
DE 6.50 usec  
TE 297.7 K  
D1 1.00000000 sec  
TD0 1

==== CHANNEL f1 =====  
SFO1 400.1324710 MHz  
NUC1 1H  
P1 14.50 usec  
SI 65536  
SF 400.1300000 MHz  
WDW EM  
SSB 0  
LB 0.30 Hz  
GB 0  
PC 1.00

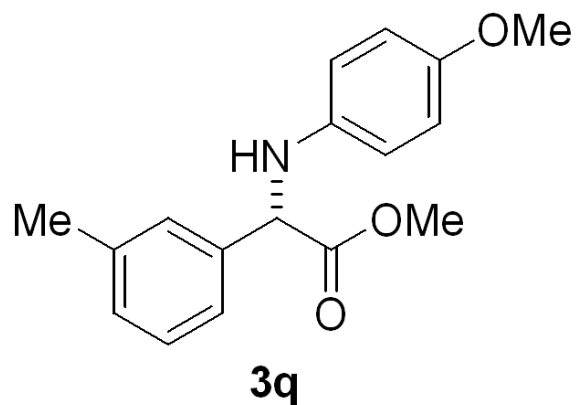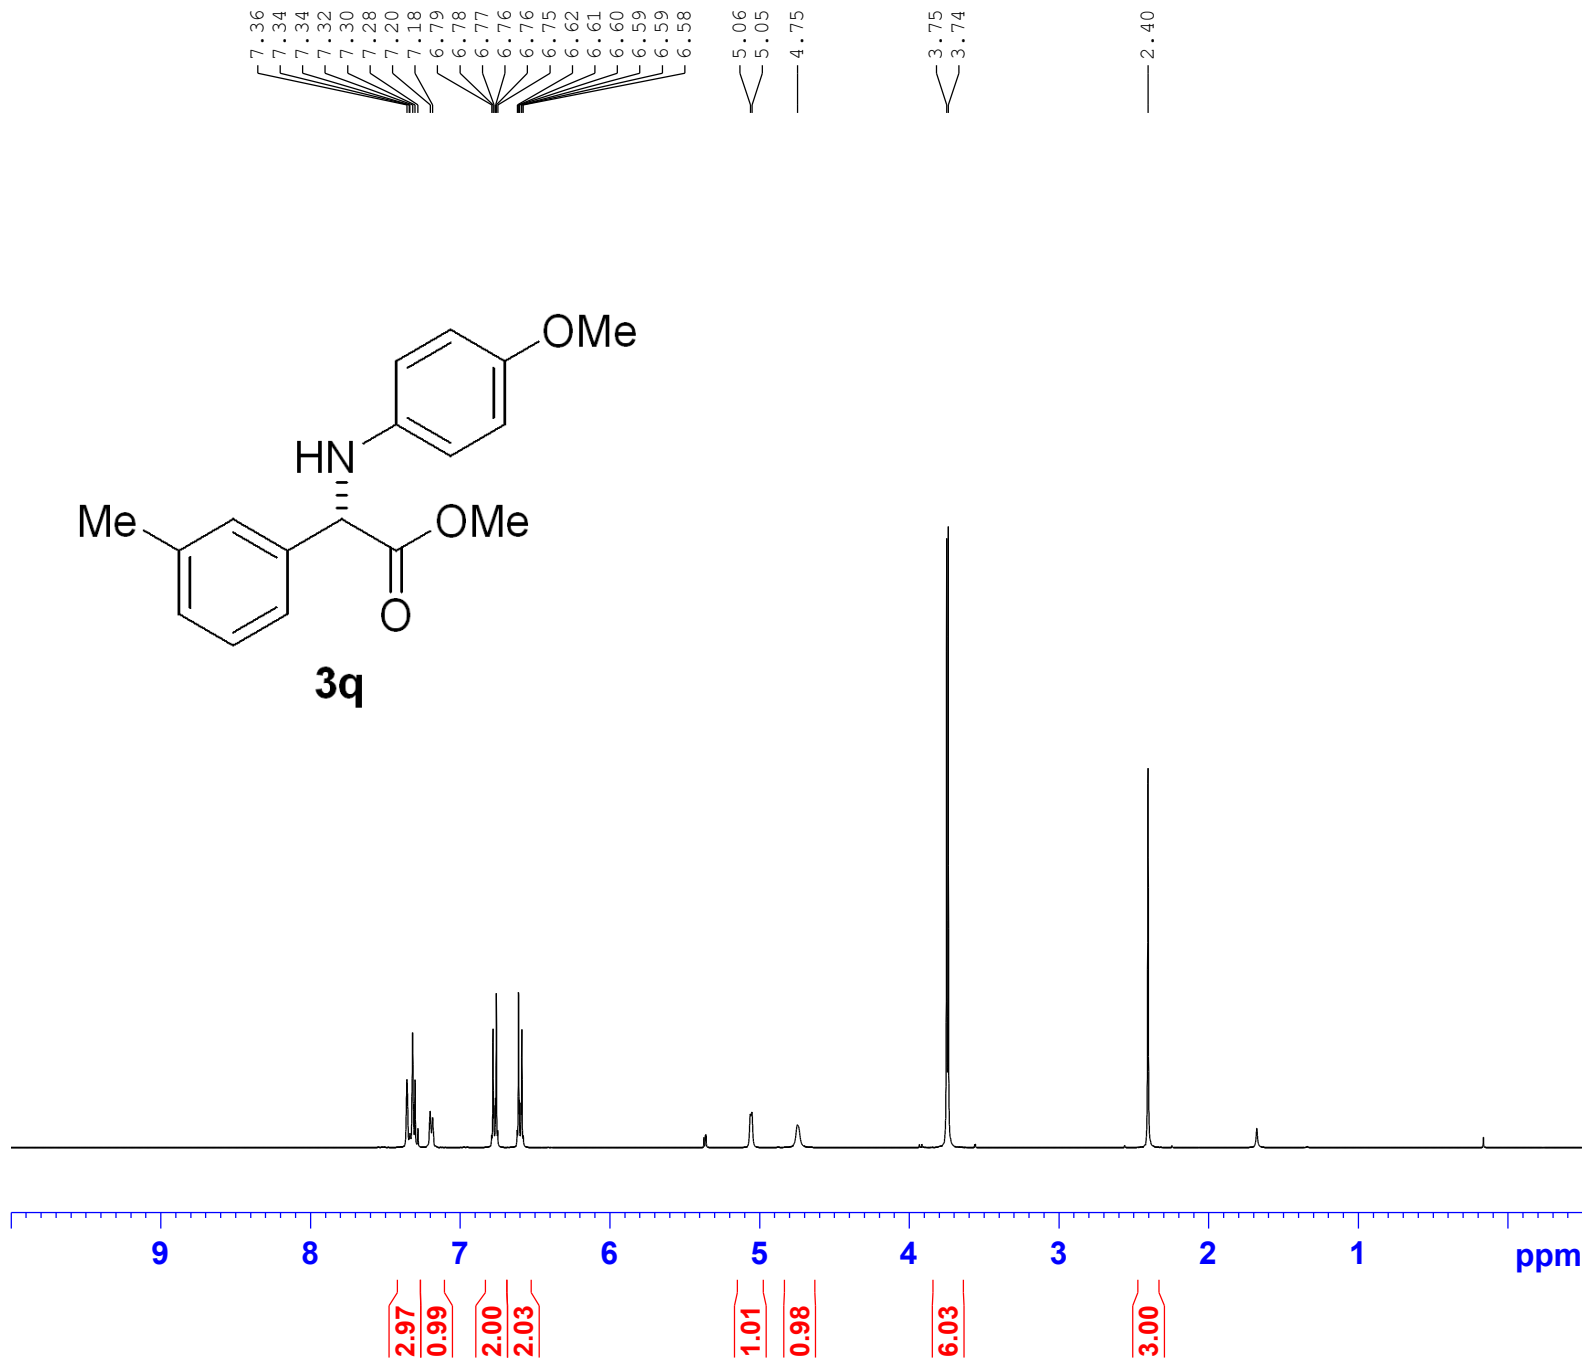

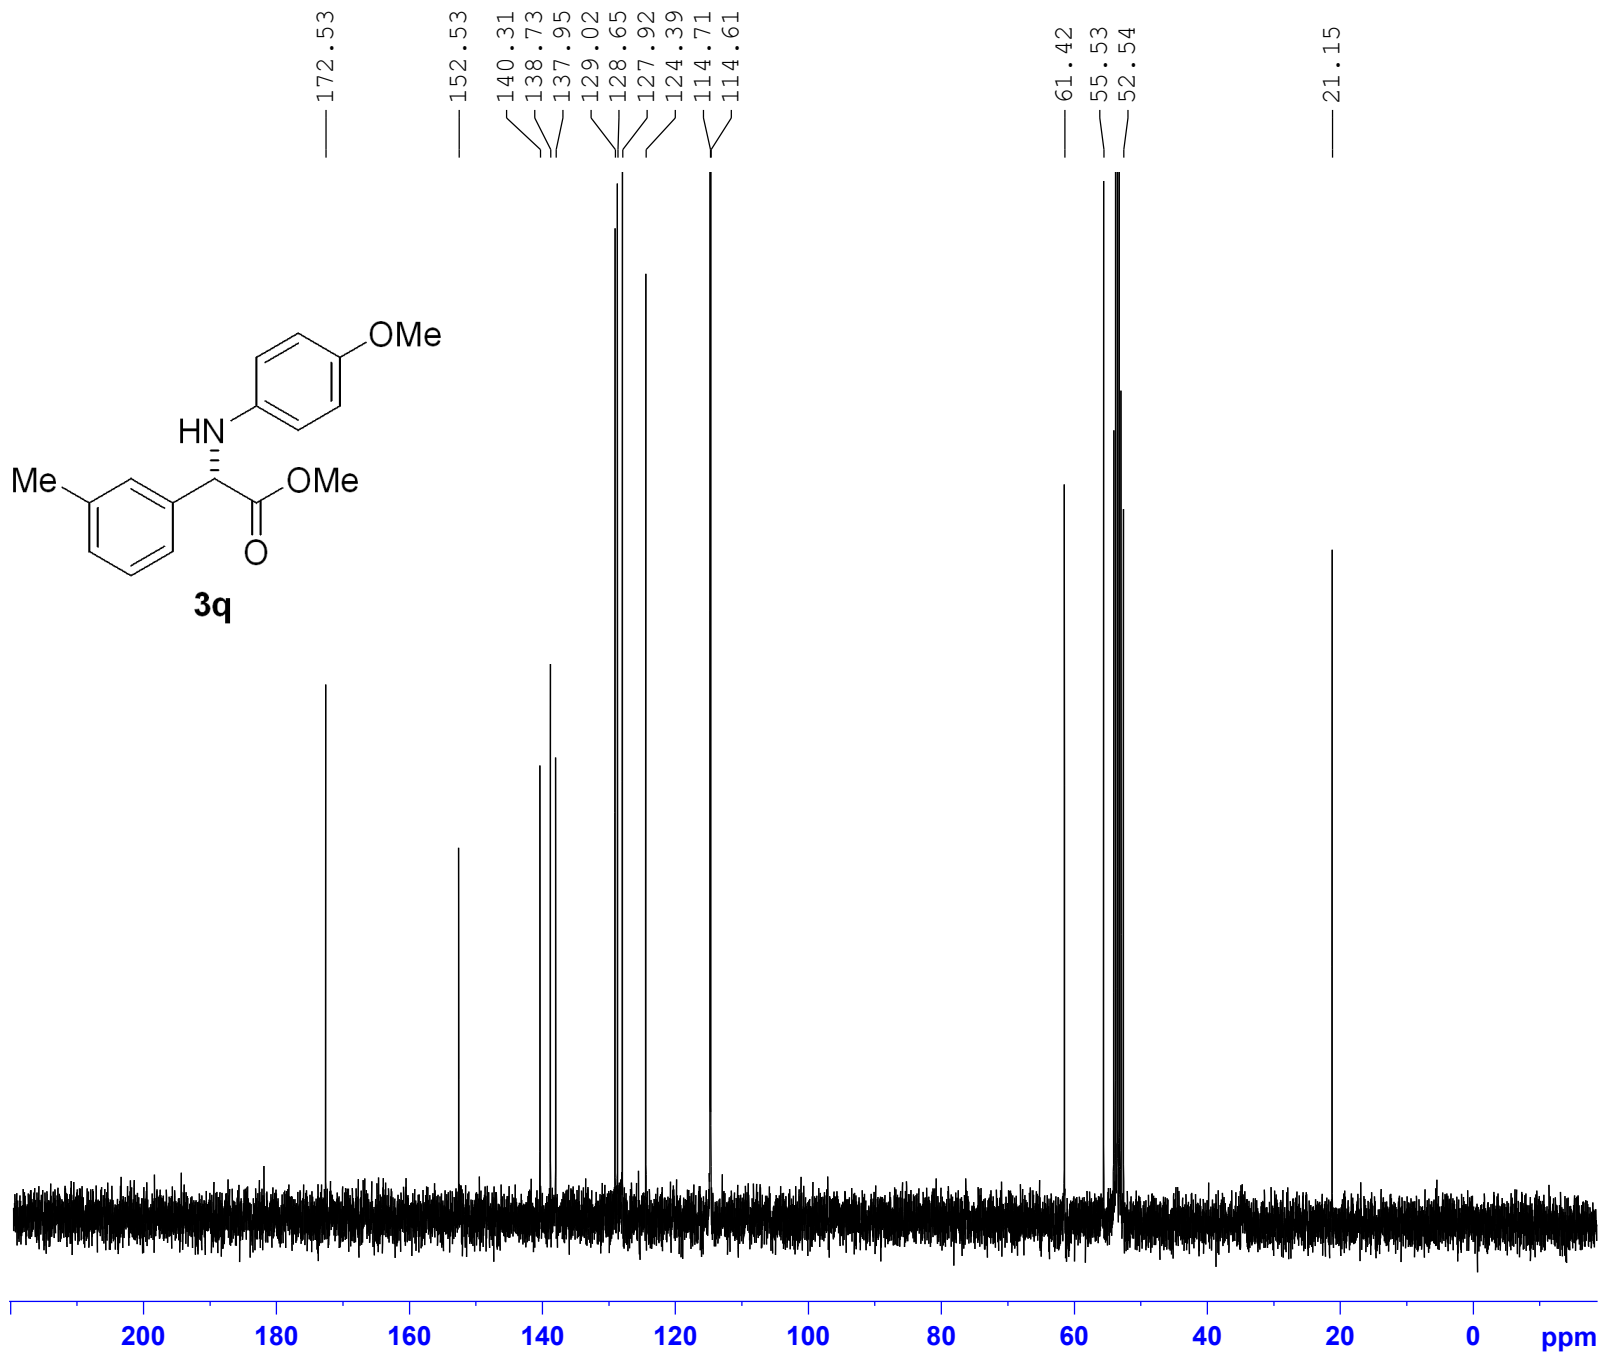

```

NAME      CNMR-gwg-9-14-1
EXPNO     1
PROCNO    1
Date_     20201001
Time_     19.24
INSTRUM   spect
PROBHD    5 mm PABBO BB/
PULPROG   zgpg30
TD         65536
SOLVENT   CD2C12
NS         31
DS         0
SWH       24038.461 Hz
FIDRES    0.366798 Hz
AQ         1.3631988 sec
RG         196.92
DW         20.800 usec
DE         6.50 usec
TE         298.3 K
D1         2.00000000 sec
D11        0.03000000 sec
TD0        1
  
```

```

===== CHANNEL f1 =====
SF01      100.6228298 MHz
NUC1       13C
P1         9.70 usec
SI         32768
SF         100.6127690 MHz
WDW        EM
SSB        0
LB         1.00 Hz
GB         0
PC         1.40
  
```



NAME HNMR-gwg-8-159-true  
EXPNO 1  
PROCNO 1  
Date\_ 20200908  
Time\_ 17.11  
INSTRUM spect  
PROBHD 5 mm PABBO BB/  
PULPROG zg30  
TD 65536  
SOLVENT Acetone  
NS 4  
DS 0  
SWH 8012.820 Hz  
FIDRES 0.122266 Hz  
AQ 4.0894966 sec  
RG 45.67  
DW 62.400 usec  
DE 6.50 usec  
TE 296.4 K  
D1 1.00000000 sec  
TD0 1

==== CHANNEL f1 =====  
SFO1 400.1324710 MHz  
NUC1 1H  
P1 14.50 usec  
SI 65536  
SF 400.1300000 MHz  
WDW EM  
SSB 0  
LB 0.30 Hz  
GB 0  
PC 1.00

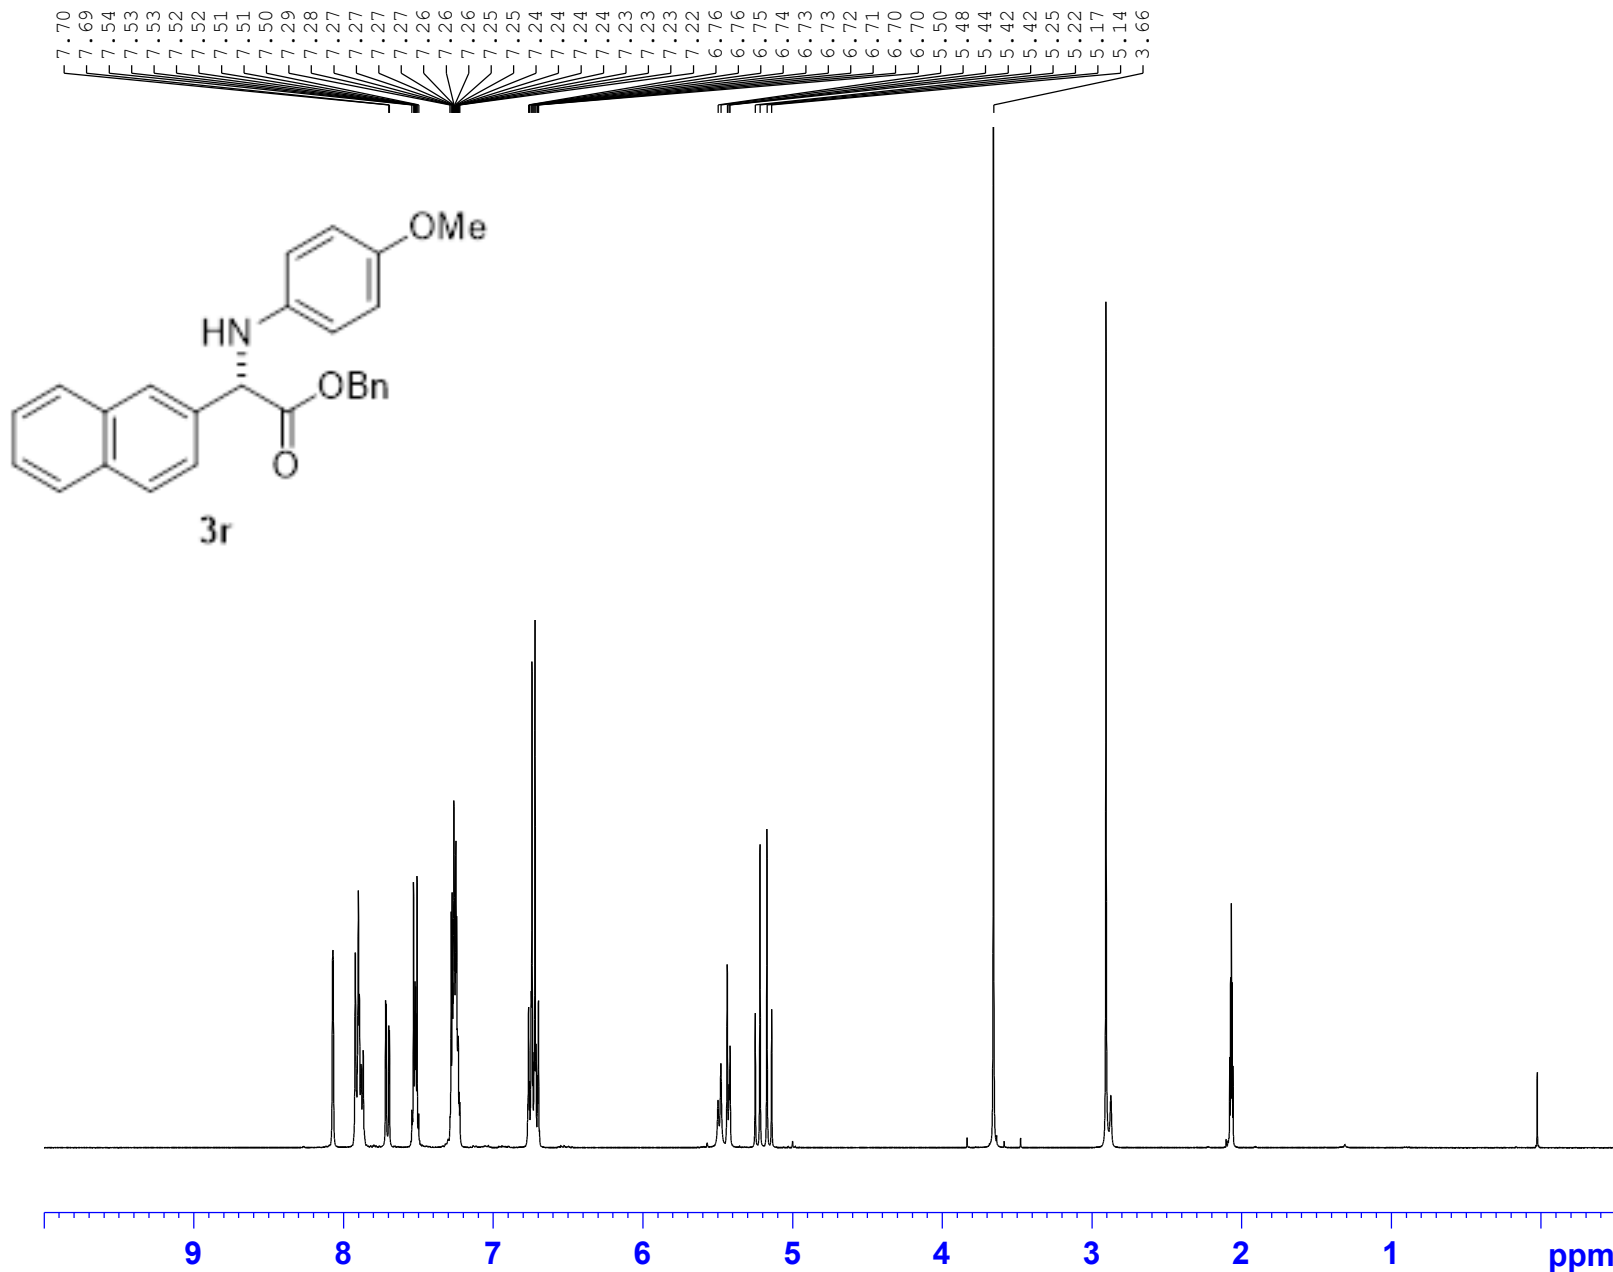



NAME CNMR-gwg-8-159-true  
EXPNO 1  
PROCNO 1  
Date\_ 20200908  
Time\_ 17.16  
INSTRUM spect  
PROBHD 5 mm PABBO BB/  
PULPROG zgpg30  
TD 65536  
SOLVENT Acetone  
NS 96  
DS 0  
SWH 24038.461 Hz  
FIDRES 0.366798 Hz  
AQ 1.3631988 sec  
RG 196.92  
DW 20.800 usec  
DE 6.50 usec  
TE 297.0 K  
D1 2.00000000 sec  
D11 0.03000000 sec  
TD0 1

==== CHANNEL f1 =====  
SF01 100.6228298 MHz  
NUC1 13C  
P1 9.70 usec  
SI 32768  
SF 100.6127690 MHz  
WDW EM  
SSB 0  
LB 1.00 Hz  
GB 0  
PC 1.40

171.66  
152.43  
140.89  
136.06  
135.87  
133.42  
133.27  
128.32  
127.98  
127.91  
127.76  
127.63  
126.57  
126.29  
126.18  
125.40  
114.81  
114.50

66.52  
61.46  
54.81

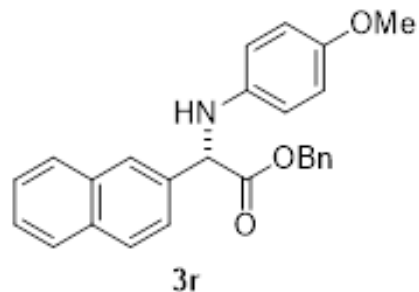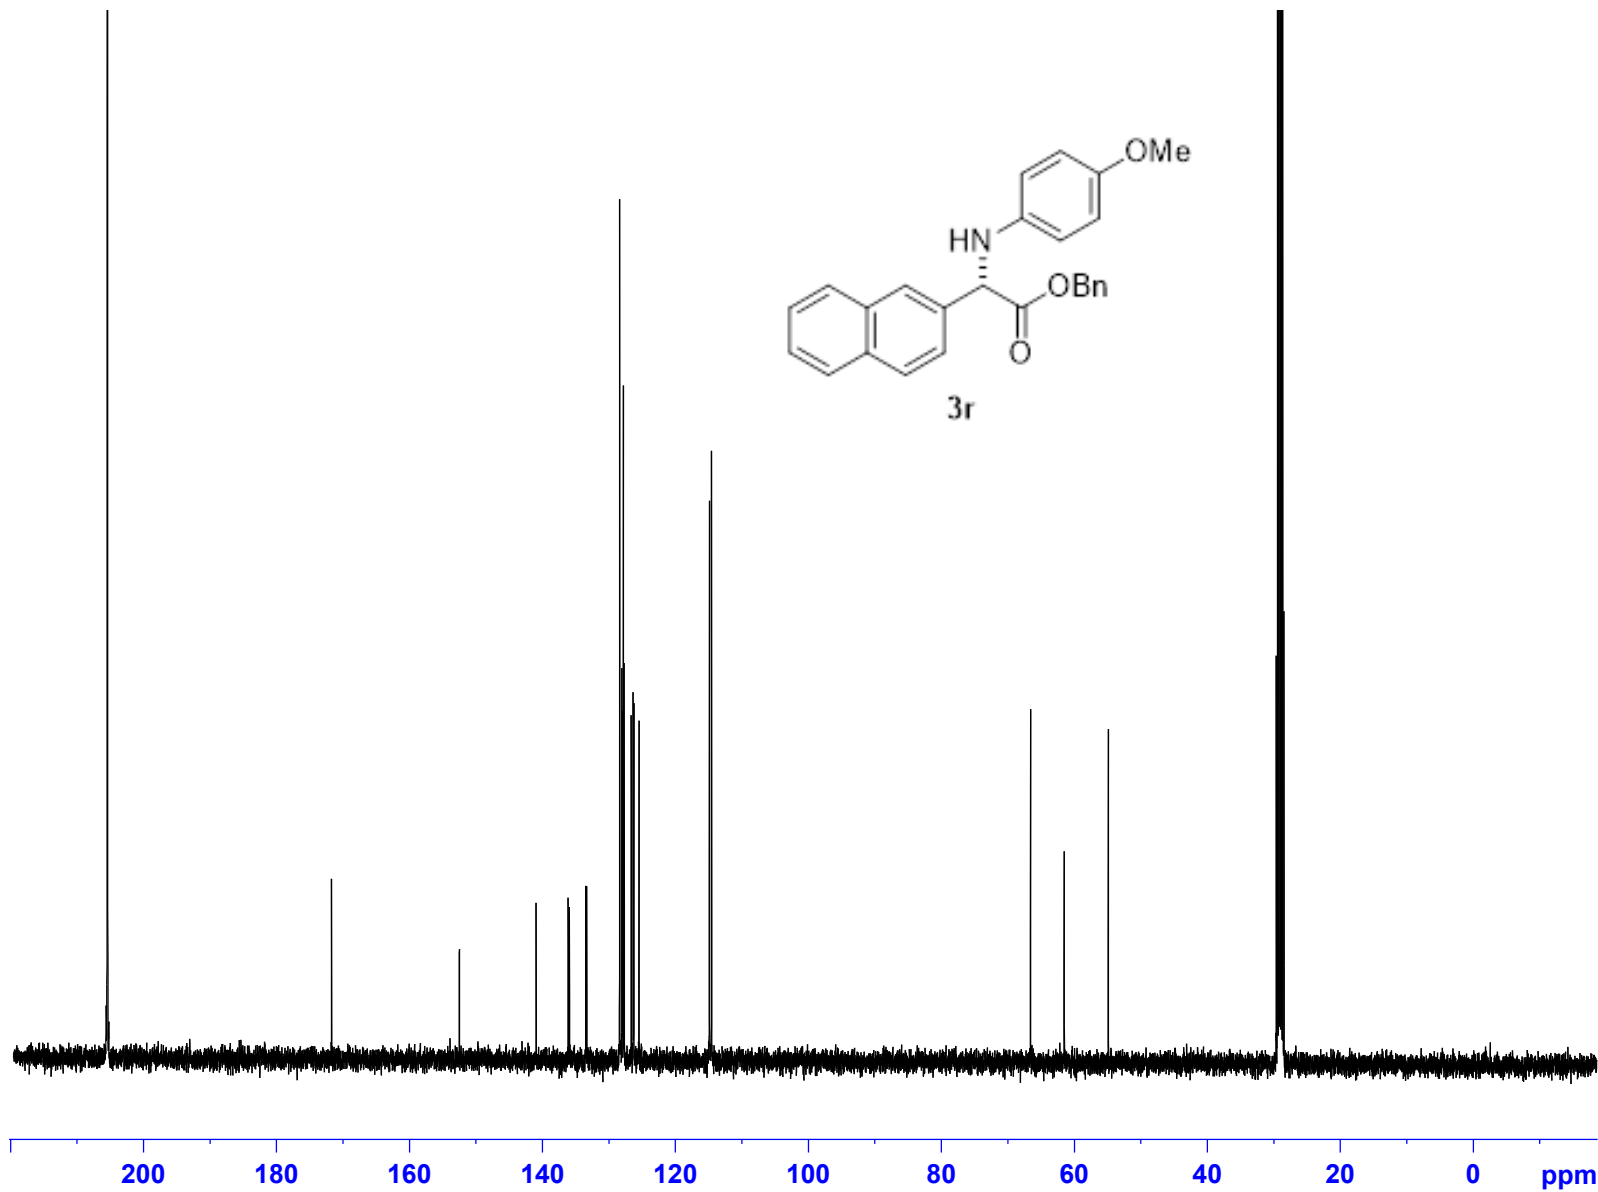



7.40  
7.40  
7.40  
7.40  
7.39  
7.38  
7.38  
7.22  
7.22  
7.21  
7.21  
6.81  
6.80  
6.79  
6.78  
6.78  
6.77  
6.65  
6.64  
6.63  
6.62  
6.62  
6.61  
5.22

4.61

3.77  
3.75

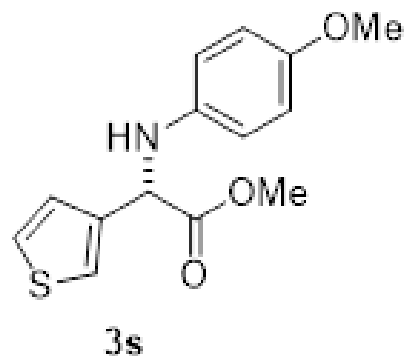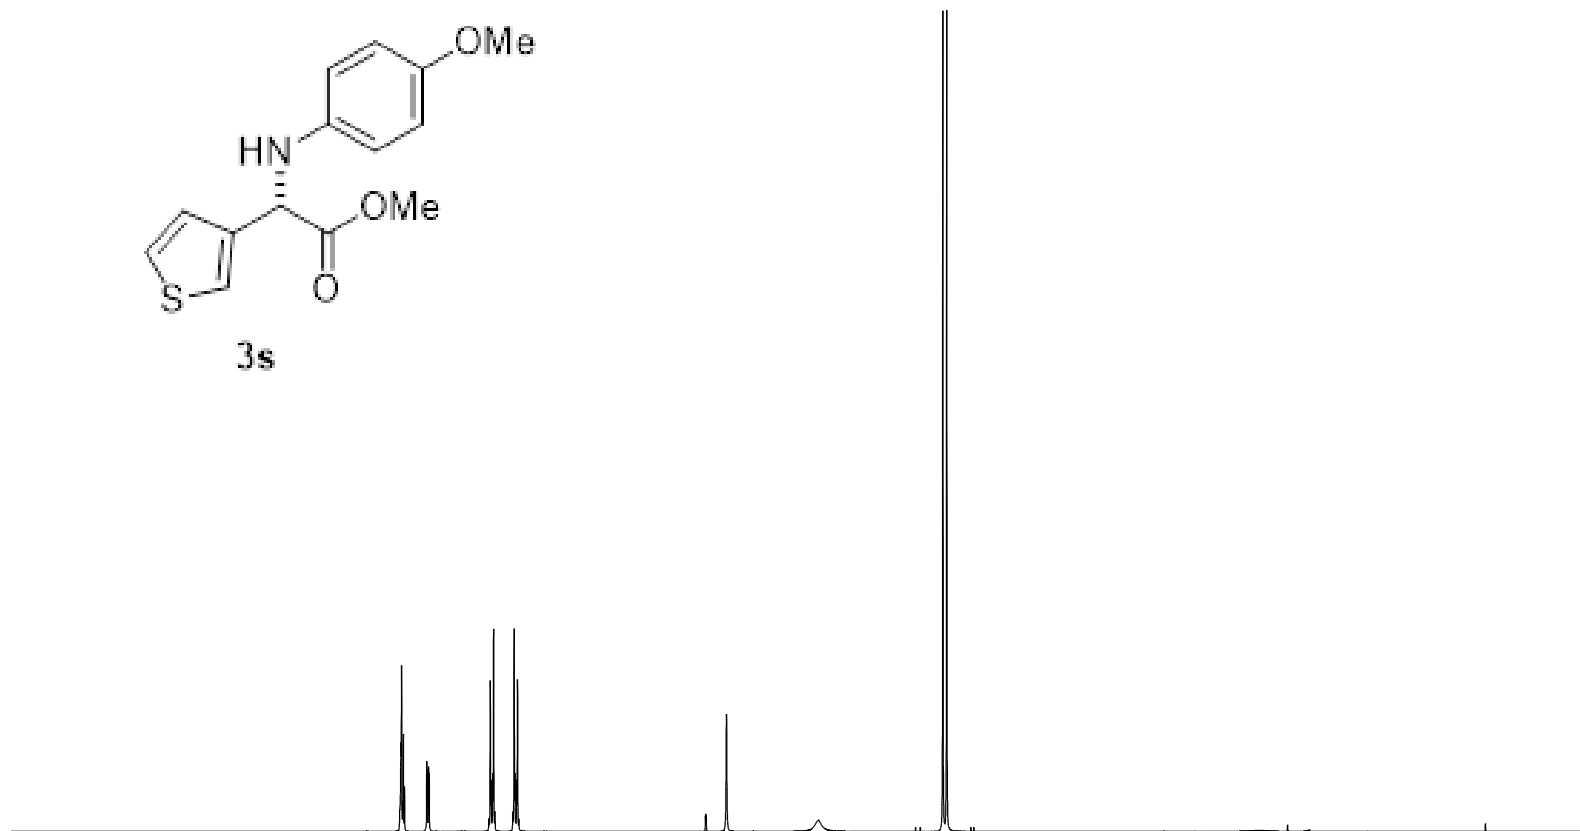

NAME HNMR-gwg-9-1  
EXPNO 1  
PROCNO 1  
Date\_ 20200920  
Time\_ 22.03  
INSTRUM spect  
PROBHD 5 mm PABBO BB/  
PULPROG zg30  
TD 65536  
SOLVENT CD2Cl2  
NS 4  
DS 0  
SWH 8012.820 Hz  
FIDRES 0.122266 Hz  
AQ 4.0894966 sec  
RG 39.46  
DW 62.400 usec  
DE 6.50 usec  
TE 298.0 K  
D1 1.00000000 sec  
TD0 1

==== CHANNEL f1 =====  
SFO1 400.1324710 MHz  
NUC1 1H  
P1 14.50 usec  
SI 65536  
SF 400.1300000 MHz  
WDW EM  
SSB 0  
LB 0.30 Hz  
GB 0  
PC 1.00



NAME CNMR-gwg-9-1  
EXPNO 1  
PROCNO 1  
Date\_ 20200920  
Time\_ 22.06  
INSTRUM spect  
PROBHD 5 mm PABBO BB/  
PULPROG zgpg30  
TD 65536  
SOLVENT CD2Cl2  
NS 19  
DS 0  
SWH 24038.461 Hz  
FIDRES 0.366798 Hz  
AQ 1.3631988 sec  
RG 196.92  
DW 20.800 usec  
DE 6.50 usec  
TE 298.5 K  
D1 2.00000000 sec  
D11 0.03000000 sec  
TD0 1

==== CHANNEL f1 =====  
SFO1 100.6228298 MHz  
NUC1 13C  
P1 9.70 usec  
SI 32768  
SF 100.6127690 MHz  
WDW EM  
SSB 0  
LB 1.00 Hz  
GB 0  
PC 1.40

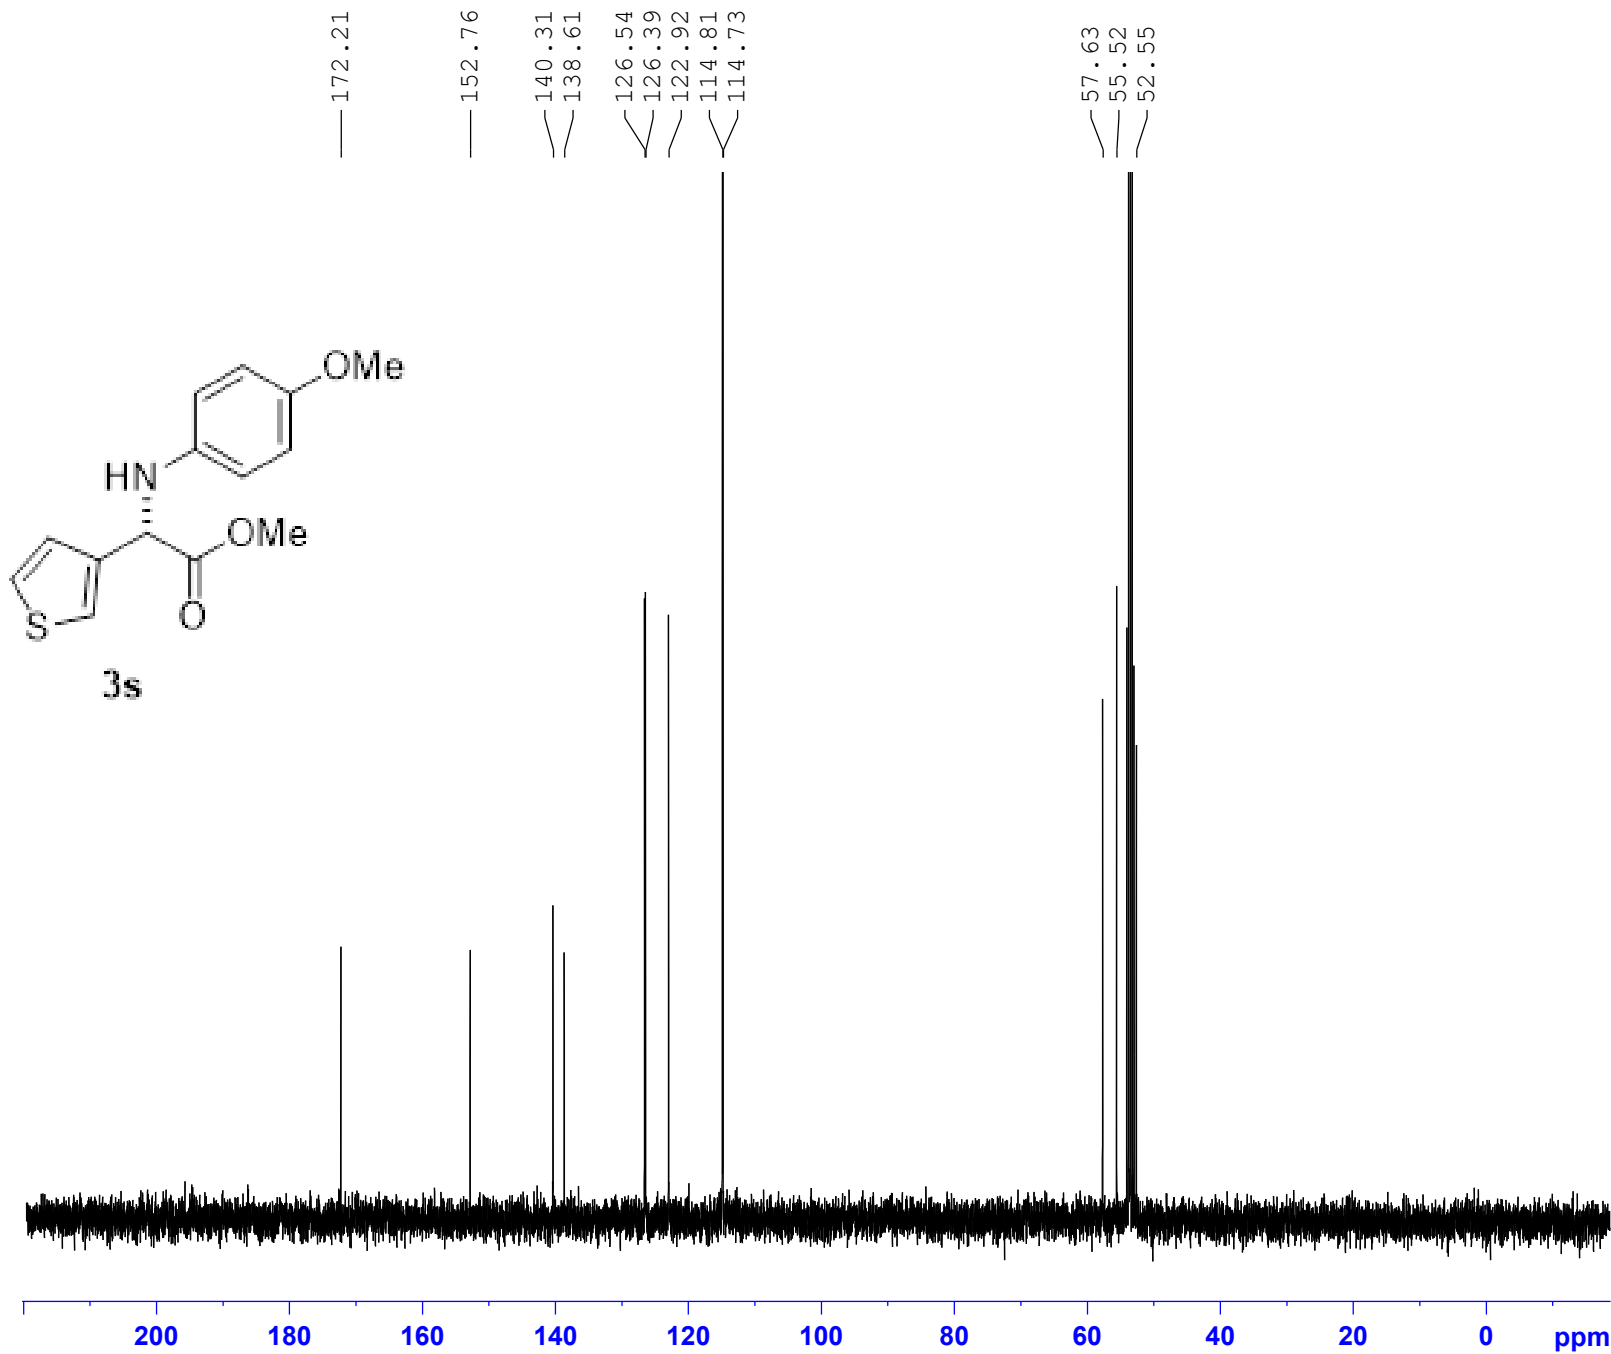





```

NAME      HNMR-gwg-8-180-1
EXPNO     1
PROCNO    1
Date_     20200915
Time      12.47
INSTRUM   spect
PROBHD    5 mm PABBO BB/
PULPROG   zg30
TD        65536
SOLVENT   CD2Cl2
NS         3
DS         0
SWH       8012.820 Hz
FIDRES    0.122266 Hz
AQ        4.0894966 sec
RG        34.77
DW        62.400 usec
DE        6.50 usec
TE        296.9 K
D1        1.00000000 sec
TD0       1

===== CHANNEL f1 =====
SFO1     400.1324710 MHz
NUC1      1H
P1        14.50 usec
SI        65536
SF        400.1300000 MHz
WDW       EM
SSB       0
LB        0.30 Hz
GB         0
PC        1.00
  
```

7.36  
7.36  
7.36  
7.35  
7.34  
7.33  
7.30  
7.29  
7.27  
7.26  
7.25  
7.25  
7.24  
7.23  
6.77  
6.76  
6.75  
6.75  
6.61  
6.61  
6.59  
6.59  
5.24  
5.21  
5.17  
5.14  
5.09  
5.09  
3.74  
2.95  
2.94  
2.93  
2.92  
2.55  
2.50  
2.48  
2.43  
2.17  
2.15  
2.13  
2.12  
2.11  
2.10  
2.09  
2.08  
2.06  
2.06  
1.98  
1.96  
1.95  
1.70  
1.69  
1.67  
1.65  
1.64  
1.62  
1.60  
1.59  
1.58  
1.57  
1.57  
1.56  
1.55  
1.54  
1.52  
1.51  
1.50  
1.49  
1.49  
0.94

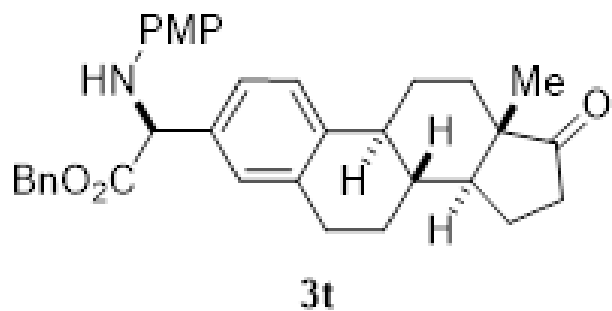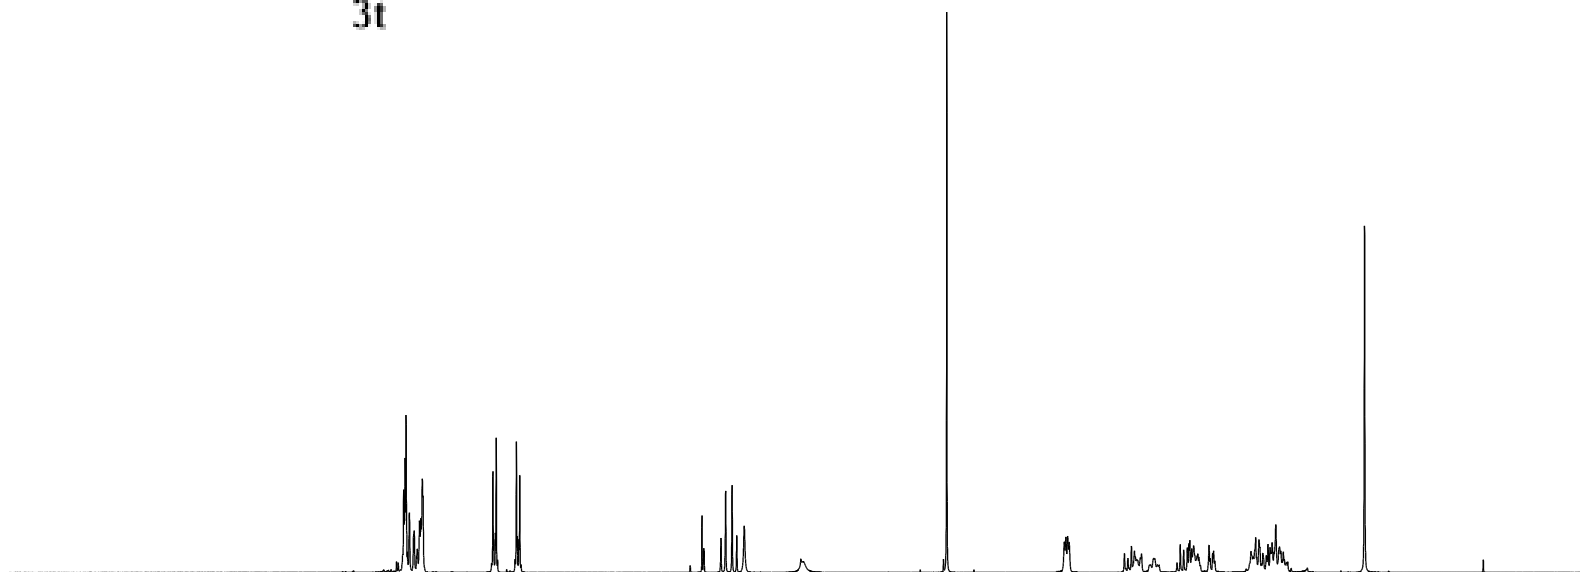

9

8

3.99

4.00

2.08

2.09

2.07

1.01

1.04

0.07

2.98

2.11

2.09

1.09

3.25

1.07

6.74

3.21

ppm

S-145

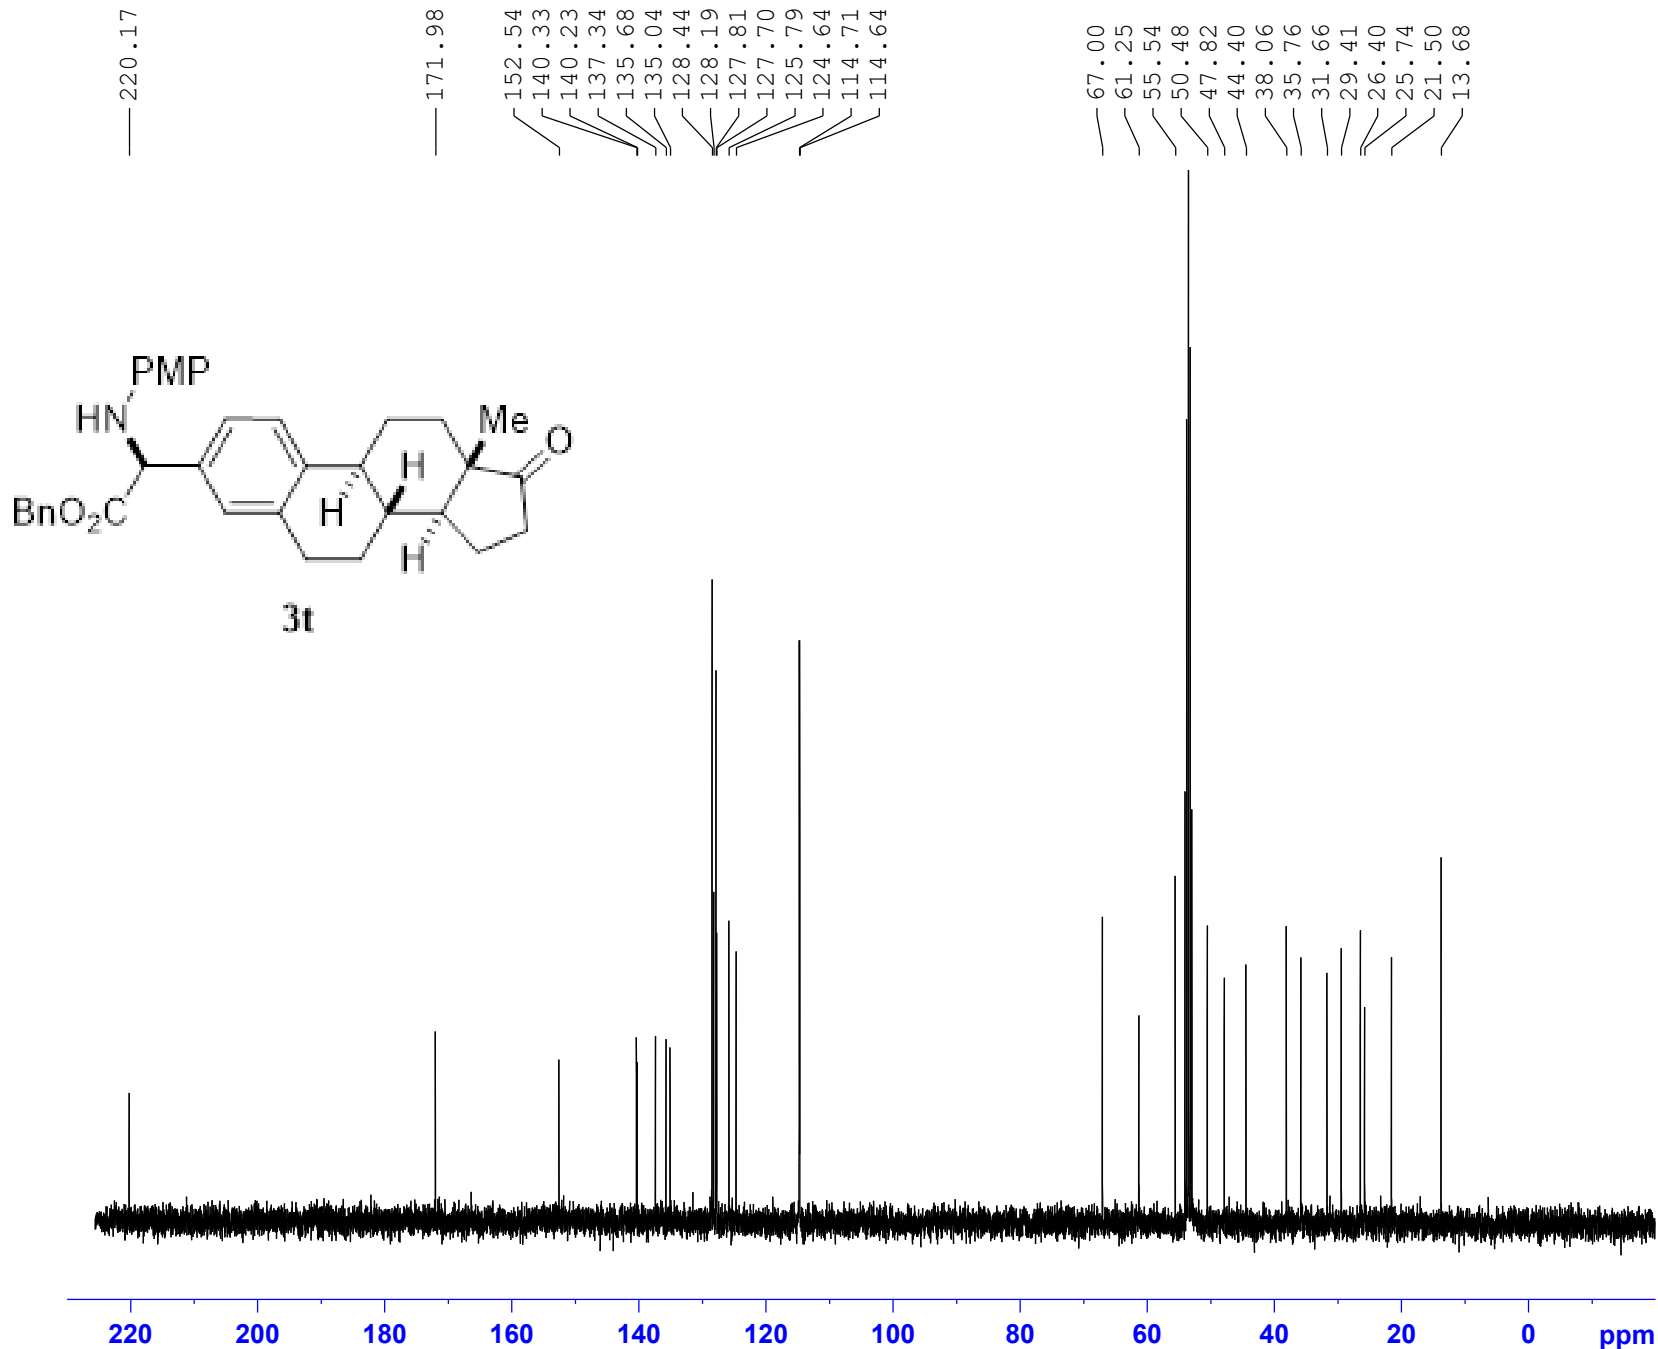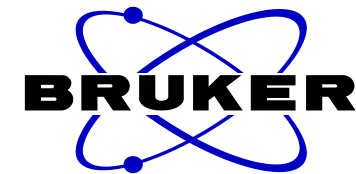

```

NAME      CNMR-gwg-8-180-2
EXPNO     1
PROCNO    1
Date_     20200915
Time_     13.16
INSTRUM   spect
PROBHD    5 mm PABBO BB/
PULPROG   zgpg30
TD        65536
SOLVENT   CD2C12
NS        38
DS        2
SWH       25252.525 Hz
FIDRES    0.385323 Hz
AQ        1.2976629 sec
RG        196.92
DW        19.800 usec
DE        6.50 usec
TE        297.5 K
D1        2.00000000 sec
D11       0.03000000 sec
TD0       1
  
```

```

===== CHANNEL f1 =====
SF01     100.6228298 MHz
NUC1     13C
P1       9.70 usec
SI       32768
SF       100.6127690 MHz
WDW      EM
SSB      0
LB       1.00 Hz
GB       0
PC       1.40
  
```



NAME HNMR-gwg-8-189-1  
EXPNO 1  
PROCNO 1  
Date\_ 20200920  
Time\_ 22.10  
INSTRUM spect  
PROBHD 5 mm PABBO BB/  
PULPROG zg30  
TD 65536  
SOLVENT CD2Cl2  
NS 4  
DS 0  
SWH 8012.820 Hz  
FIDRES 0.122266 Hz  
AQ 4.0894966 sec  
RG 22.47  
DW 62.400 usec  
DE 6.50 usec  
TE 298.1 K  
D1 1.00000000 sec  
TD0 1

==== CHANNEL f1 =====  
SFO1 400.1324710 MHz  
NUC1 1H  
P1 14.50 usec  
SI 65536  
SF 400.1300000 MHz  
WDW EM  
SSB 0  
LB 0.30 Hz  
GB 0  
PC 1.00

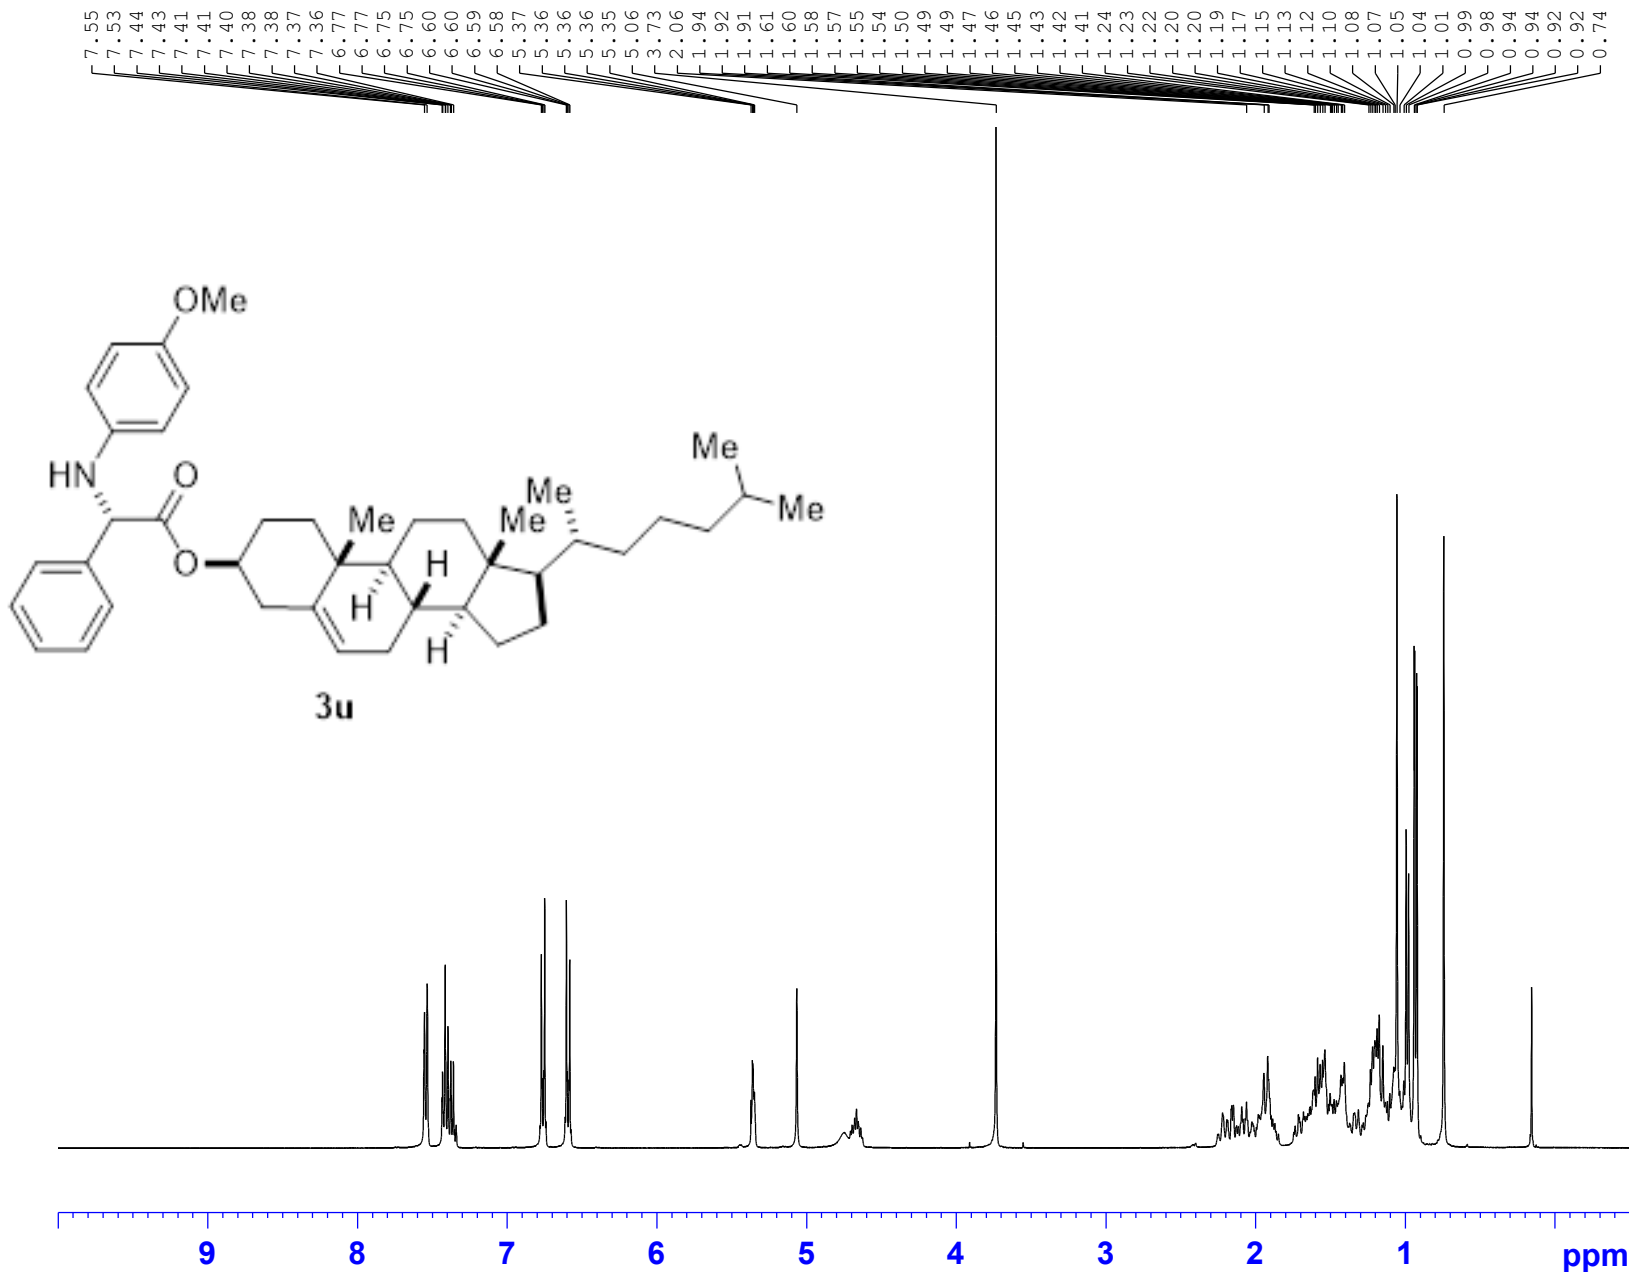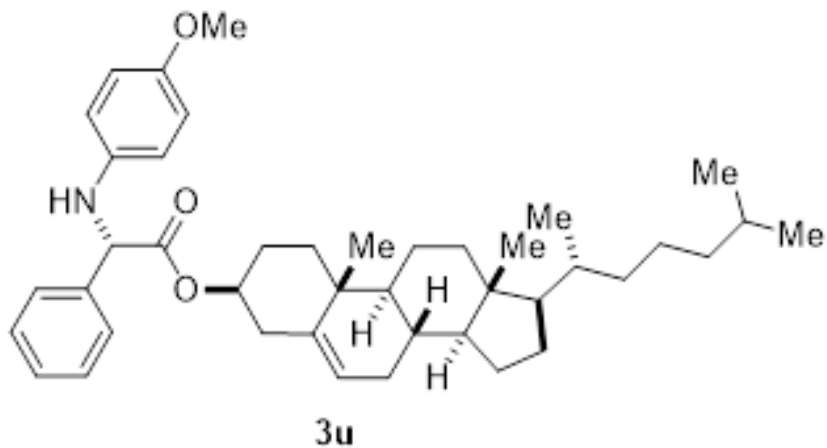

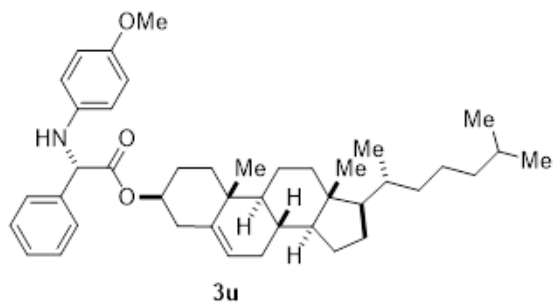

— 171.31  
 — 152.47  
 140.32  
 139.40  
 138.19  
 128.69  
 128.09  
 127.21  
 122.75  
 114.70  
 114.63

75.37  
 61.58  
 56.71  
 56.18  
 55.52  
 50.05  
 42.29  
 39.77  
 39.52  
 37.55  
 36.92  
 36.54  
 36.21  
 35.83  
 31.89  
 31.83  
 28.21  
 28.04  
 27.70  
 24.25  
 23.83  
 22.60  
 22.35  
 21.03  
 19.10

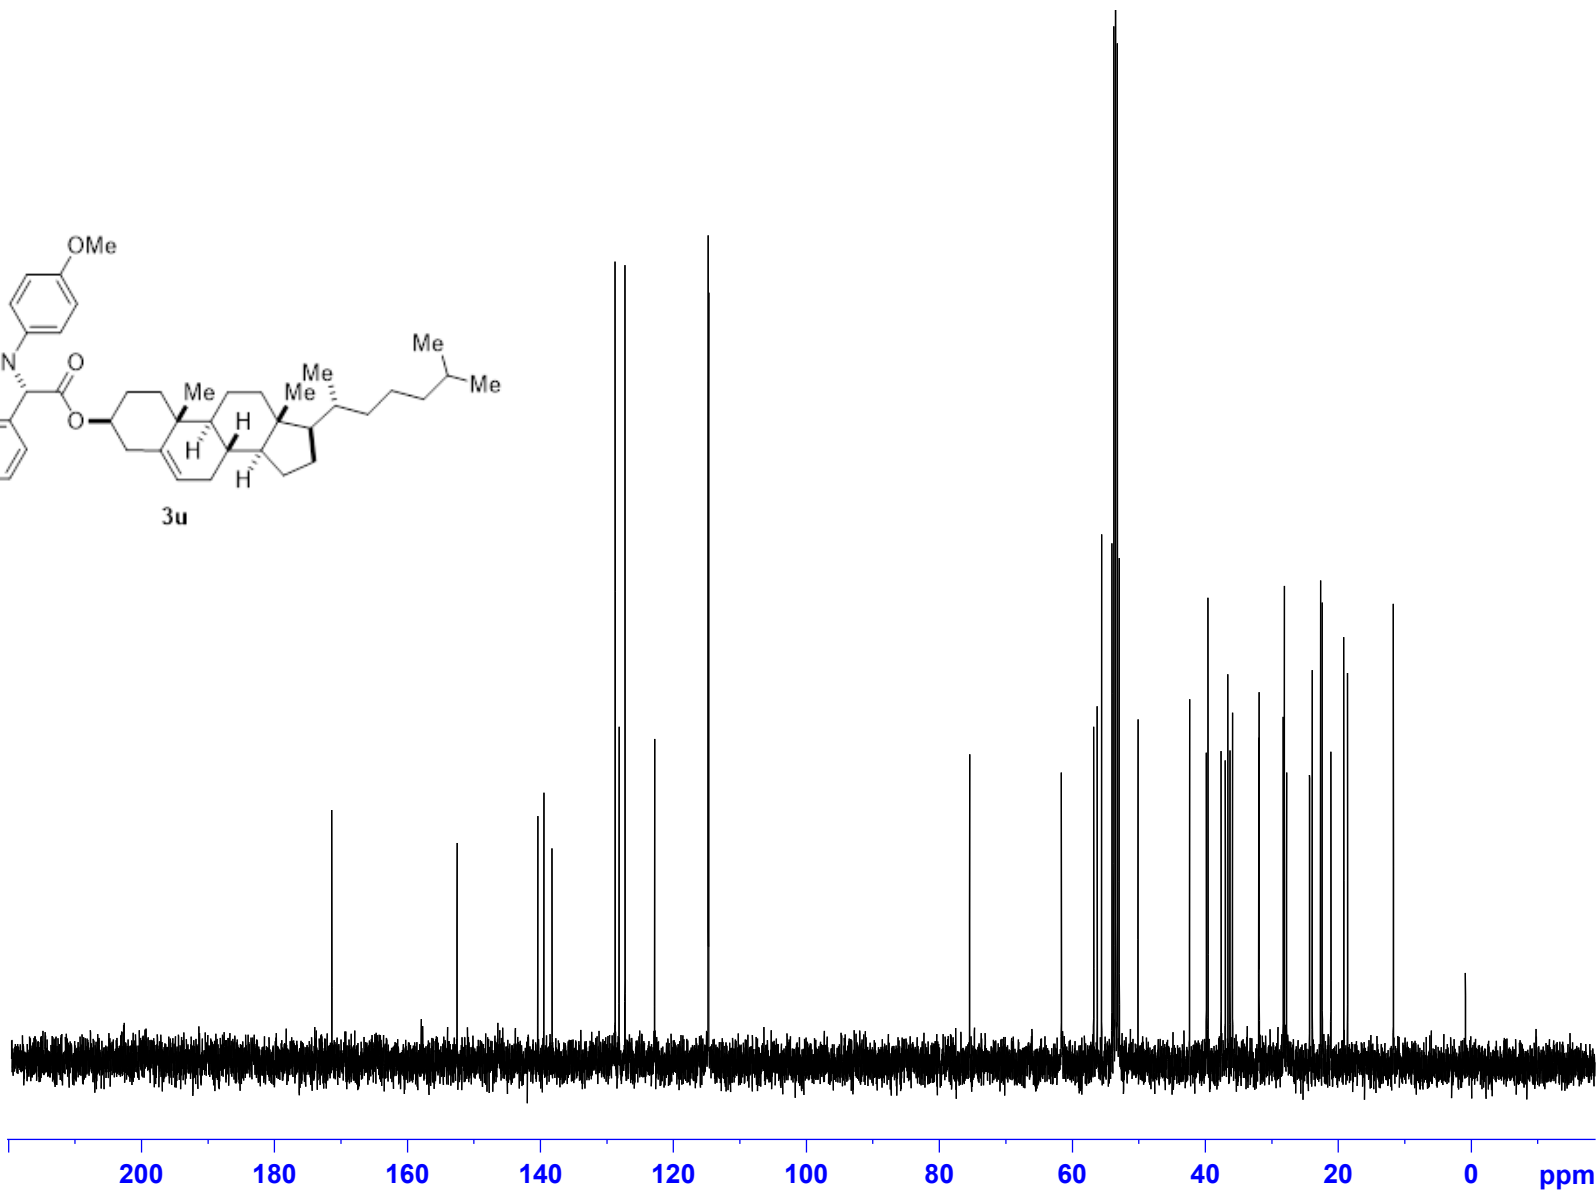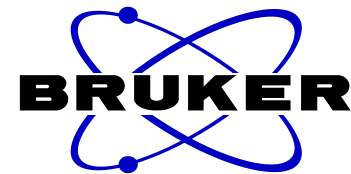

NAME CNMR-gwg-8-189-1  
 EXPNO 1  
 PROCNO 1  
 Date\_ 20200920  
 Time\_ 22.14  
 INSTRUM spect  
 PROBHD 5 mm PABBO BB/  
 PULPROG zgpg30  
 TD 65536  
 SOLVENT CD2Cl2  
 NS 22  
 DS 0  
 SWH 24038.461 Hz  
 FIDRES 0.366798 Hz  
 AQ 1.3631988 sec  
 RG 196.92  
 DW 20.800 usec  
 DE 6.50 usec  
 TE 298.6 K  
 D1 2.00000000 sec  
 D11 0.03000000 sec  
 TD0 1

===== CHANNEL f1 =====  
 SF01 100.6228298 MHz  
 NUC1 13C  
 P1 9.70 usec  
 SI 32768  
 SF 100.6127690 MHz  
 WDW EM  
 SSB 0  
 LB 1.00 Hz  
 GB 0  
 PC 1.40

7.44  
7.43  
7.43  
7.42  
7.41  
7.40  
7.39  
7.38  
7.38  
7.37  
7.36  
7.29  
7.28  
7.27  
7.27  
7.26  
7.25  
7.21  
7.21  
7.20  
7.20  
7.19  
7.19  
7.18  
7.17  
7.17  
7.16  
6.79  
6.79  
6.79  
6.77  
6.75  
6.75  
6.75  
6.67  
6.67  
6.66  
6.65  
6.65  
6.64  
5.29  
5.26  
5.25  
5.21  
5.18  
5.11

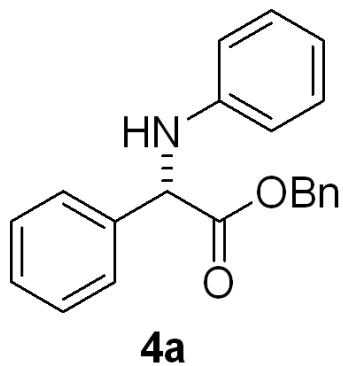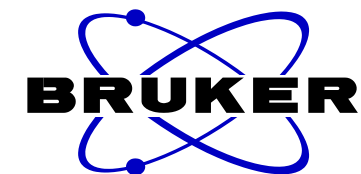

```

NAME      HNMR-gwg-9-15-1
EXPNO     1
PROCNO    1
Date_     20201001
Time_     19.28
INSTRUM   spect
PROBHD    5 mm PABBO BB/
PULPROG   zg30
TD         65536
SOLVENT   CD2Cl2
NS         4
DS         0
SWH       8012.820 Hz
FIDRES    0.122266 Hz
AQ         4.0894966 sec
RG         31.55
DW         62.400 usec
DE         6.50 usec
TE         297.8 K
D1         1.00000000 sec
TD0        1
  
```

```

===== CHANNEL f1 =====
SFO1     400.1324710 MHz
NUC1      1H
P1        14.50 usec
SI        65536
SF        400.1300000 MHz
WDW       EM
SSB       0
LB        0.30 Hz
GB        0
PC        1.00
  
```

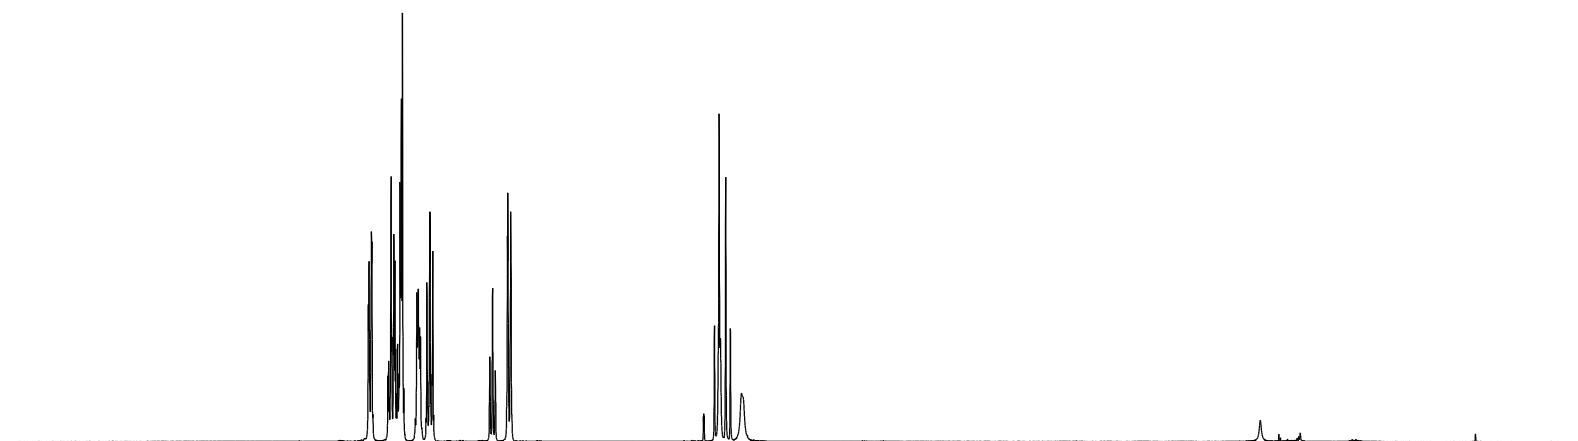

9 8 7 6 5 4 3 2 1 ppm

2.05  
5.92  
1.93  
2.03  
1.00  
2.04  
3.09  
0.96

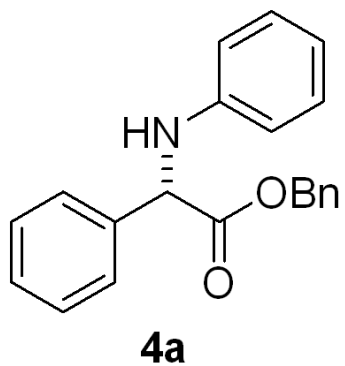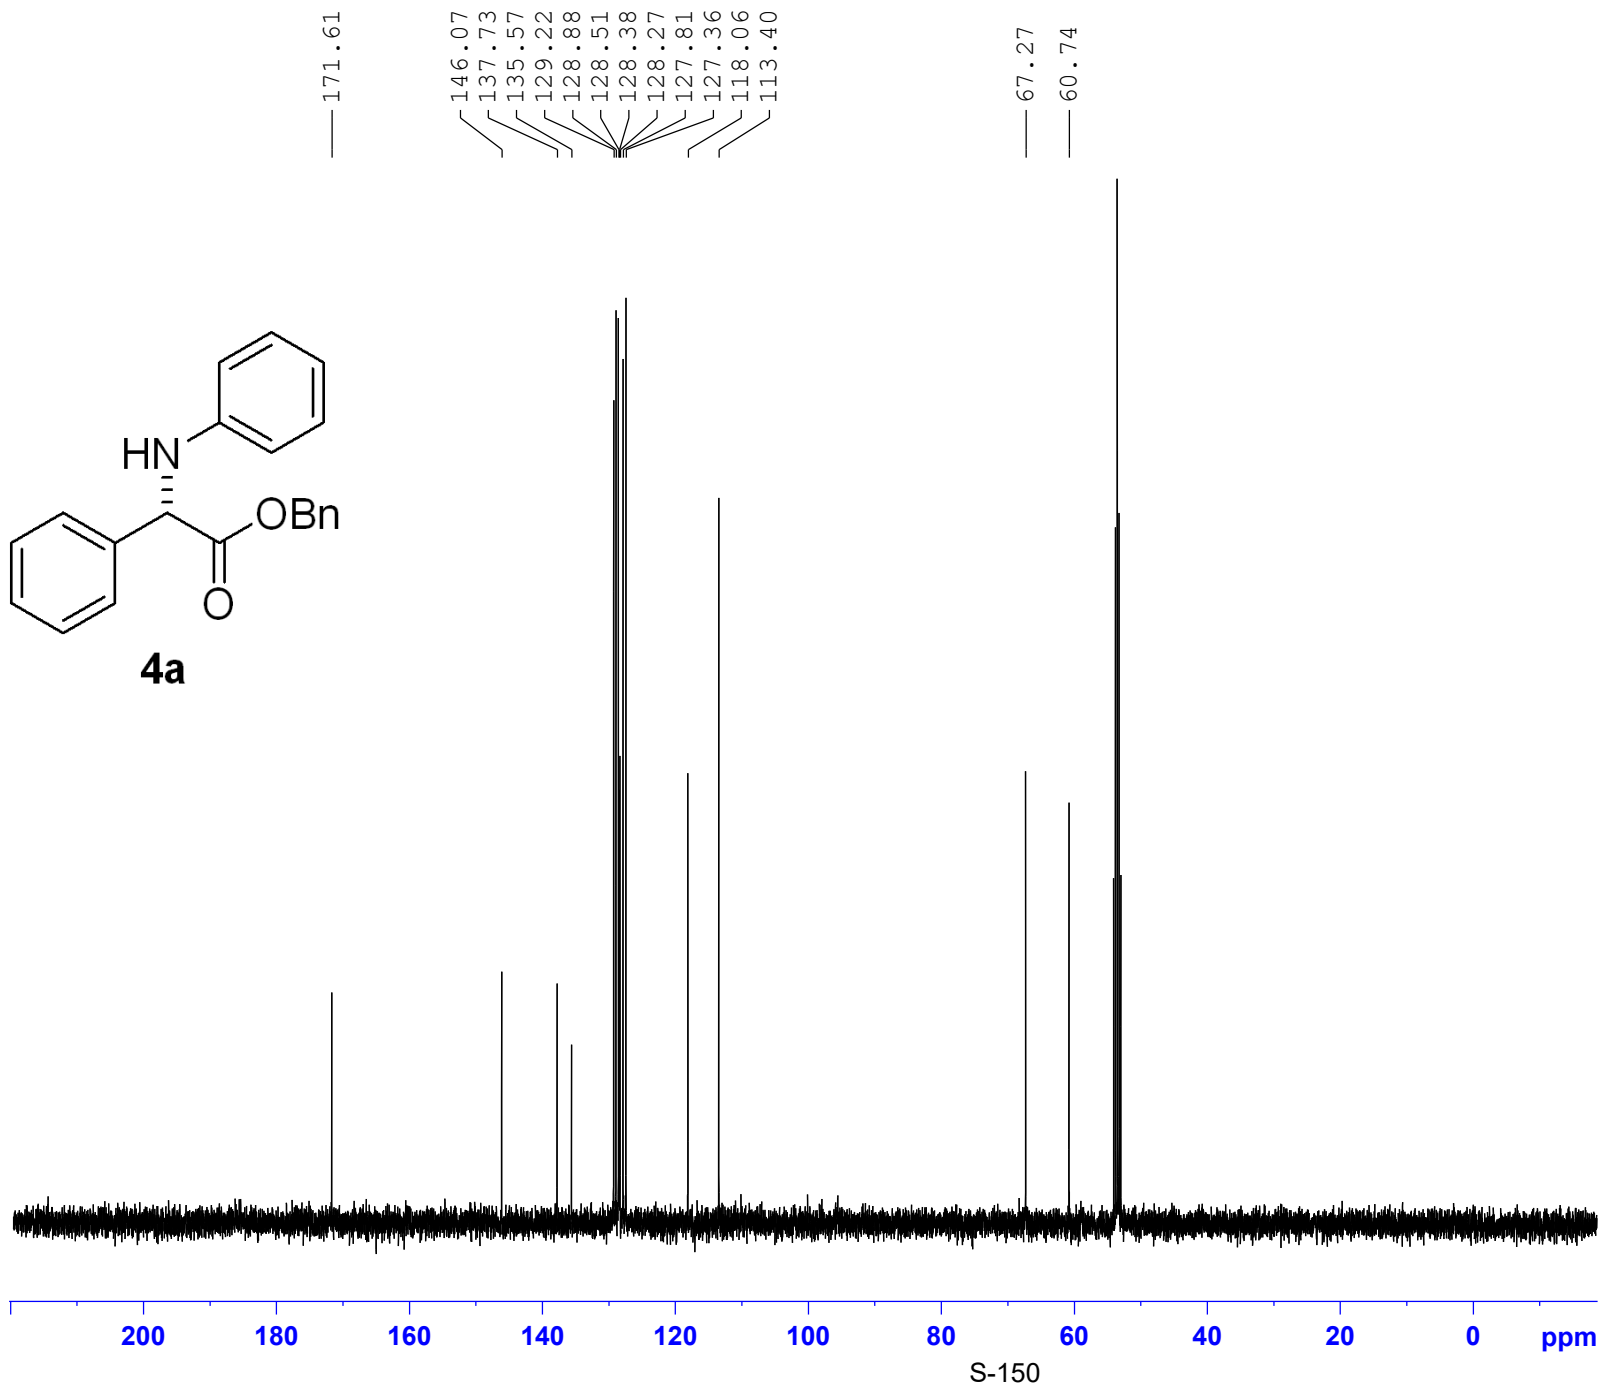

```

NAME      CNMR-gwg-9-15-1
EXPNO     1
PROCNO    1
Date_     20201001
Time_     19.32
INSTRUM   spect
PROBHD    5 mm PABBO BB/
PULPROG   zgpg30
TD         65536
SOLVENT   CD2C12
NS         10
DS         0
SWH        24038.461 Hz
FIDRES     0.366798 Hz
AQ         1.3631988 sec
RG         196.92
DW         20.800 usec
DE         6.50 usec
TE         298.2 K
D1         2.00000000 sec
D11        0.03000000 sec
TD0        1
  
```

```

===== CHANNEL f1 =====
SF01      100.6228298 MHz
NUC1       13C
P1         9.70 usec
SI         32768
SF         100.6127690 MHz
WDW        EM
SSB        0
LB         1.00 Hz
GB         0
PC         1.40
  
```



NAME HNMR-gwg-9-16-1  
EXPNO 1  
PROCNO 1  
Date\_ 20201001  
Time\_ 19.36  
INSTRUM spect  
PROBHD 5 mm PABBO BB/  
PULPROG zg30  
TD 65536  
SOLVENT CD2Cl2  
NS 4  
DS 0  
SWH 8012.820 Hz  
FIDRES 0.122266 Hz  
AQ 4.0894966 sec  
RG 27.78  
DW 62.400 usec  
DE 6.50 usec  
TE 297.8 K  
D1 1.00000000 sec  
TD0 1

==== CHANNEL f1 =====  
SFO1 400.1324710 MHz  
NUC1 1H  
P1 14.50 usec  
SI 65536  
SF 400.1300000 MHz  
WDW EM  
SSB 0  
LB 0.30 Hz  
GB 0  
PC 1.00

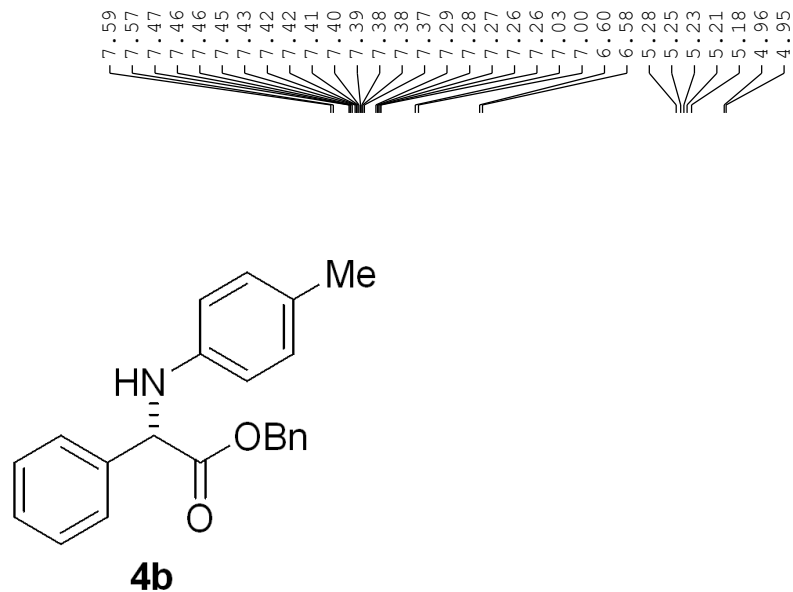

7.59  
7.57  
7.47  
7.46  
7.46  
7.45  
7.43  
7.42  
7.42  
7.41  
7.40  
7.39  
7.38  
7.38  
7.37  
7.29  
7.28  
7.27  
7.26  
7.26  
7.03  
7.00  
6.60  
6.58  
5.28  
5.25  
5.23  
5.21  
5.18  
4.96  
4.95

2.28

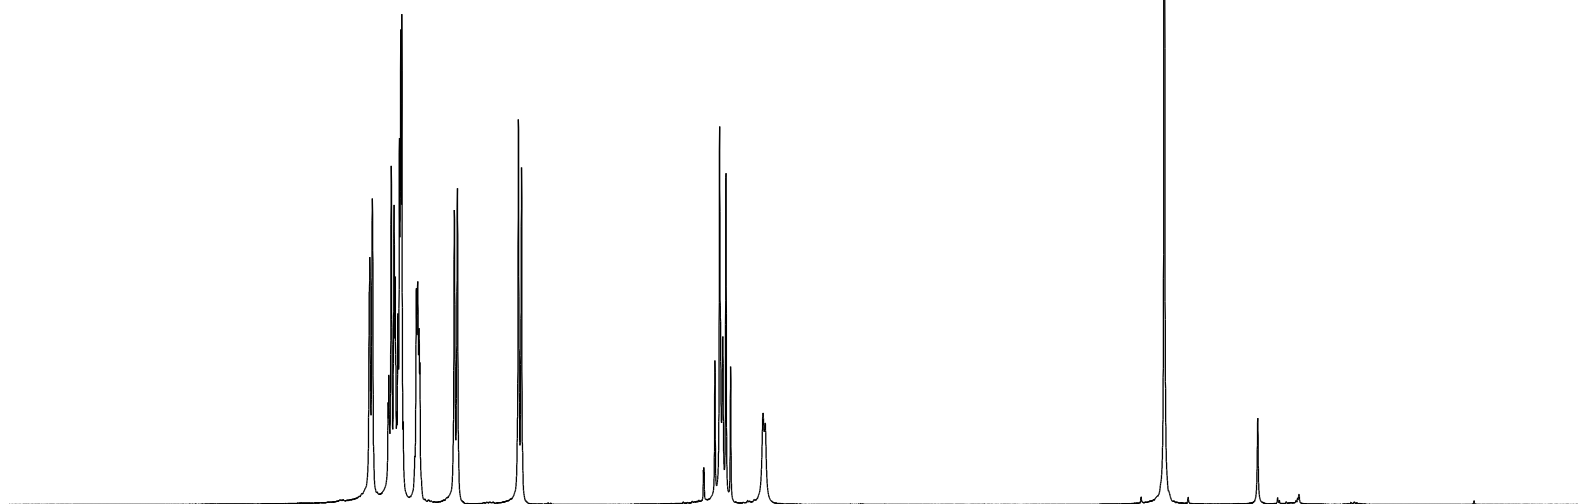

9 8 7 6 5 4 3 2 1 ppm

2.20  
5.99  
1.92  
2.00  
2.04

3.07  
1.04

3.05

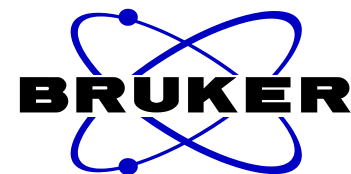

NAME CNMR-gwg-9-16-1  
EXPNO 1  
PROCNO 1  
Date\_ 20201001  
Time\_ 19.38  
INSTRUM spect  
PROBHD 5 mm PABBO BB/  
PULPROG zgpg30  
TD 65536  
SOLVENT CD2Cl2  
NS 10  
DS 0  
SWH 24038.461 Hz  
FIDRES 0.366798 Hz  
AQ 1.3631988 sec  
RG 196.92  
DW 20.800 usec  
DE 6.50 usec  
TE 298.2 K  
D1 2.00000000 sec  
D11 0.03000000 sec  
TD0 1

==== CHANNEL f1 =====  
SF01 100.6228298 MHz  
NUC1 13C  
P1 9.70 usec  
SI 32768  
SF 100.6127690 MHz  
WDW EM  
SSB 0  
LB 1.00 Hz  
GB 0  
PC 1.40

— 171.76

143.77  
137.88  
135.62  
129.70  
128.84  
128.50  
128.32  
128.25  
127.81  
127.38  
113.58

— 67.19

— 61.03

— 20.12

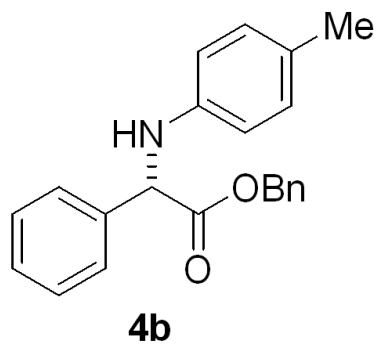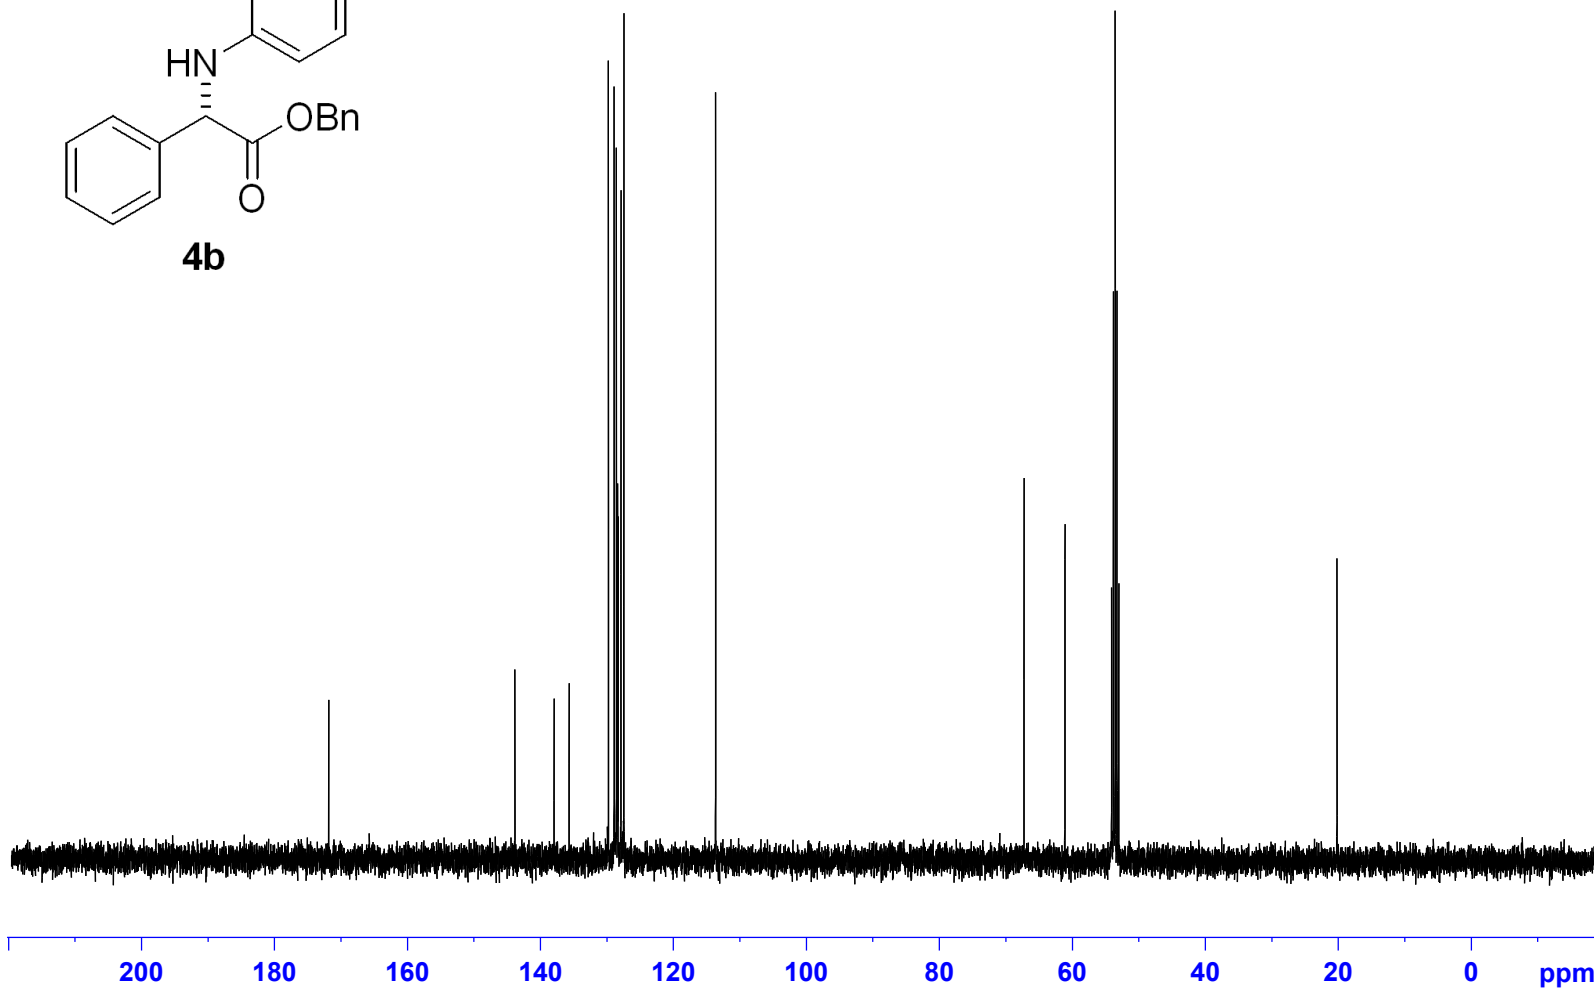



7.40  
7.40  
7.39  
7.38  
7.38  
7.36  
7.35  
7.35  
7.35  
7.34  
7.34  
7.33  
7.32  
7.32  
7.32  
7.31  
7.31  
7.30  
7.30  
7.29  
7.29  
7.25  
7.24  
7.23  
7.22  
7.16  
7.16  
7.14  
7.14  
7.13  
7.13  
6.70  
6.69  
6.69  
6.68  
6.67  
6.66  
6.66  
5.54  
5.54  
5.30  
5.30  
5.29  
5.28  
5.23  
5.20  
5.17  
5.14

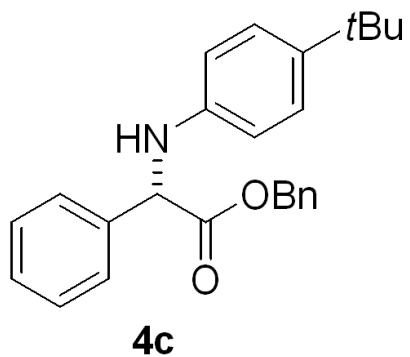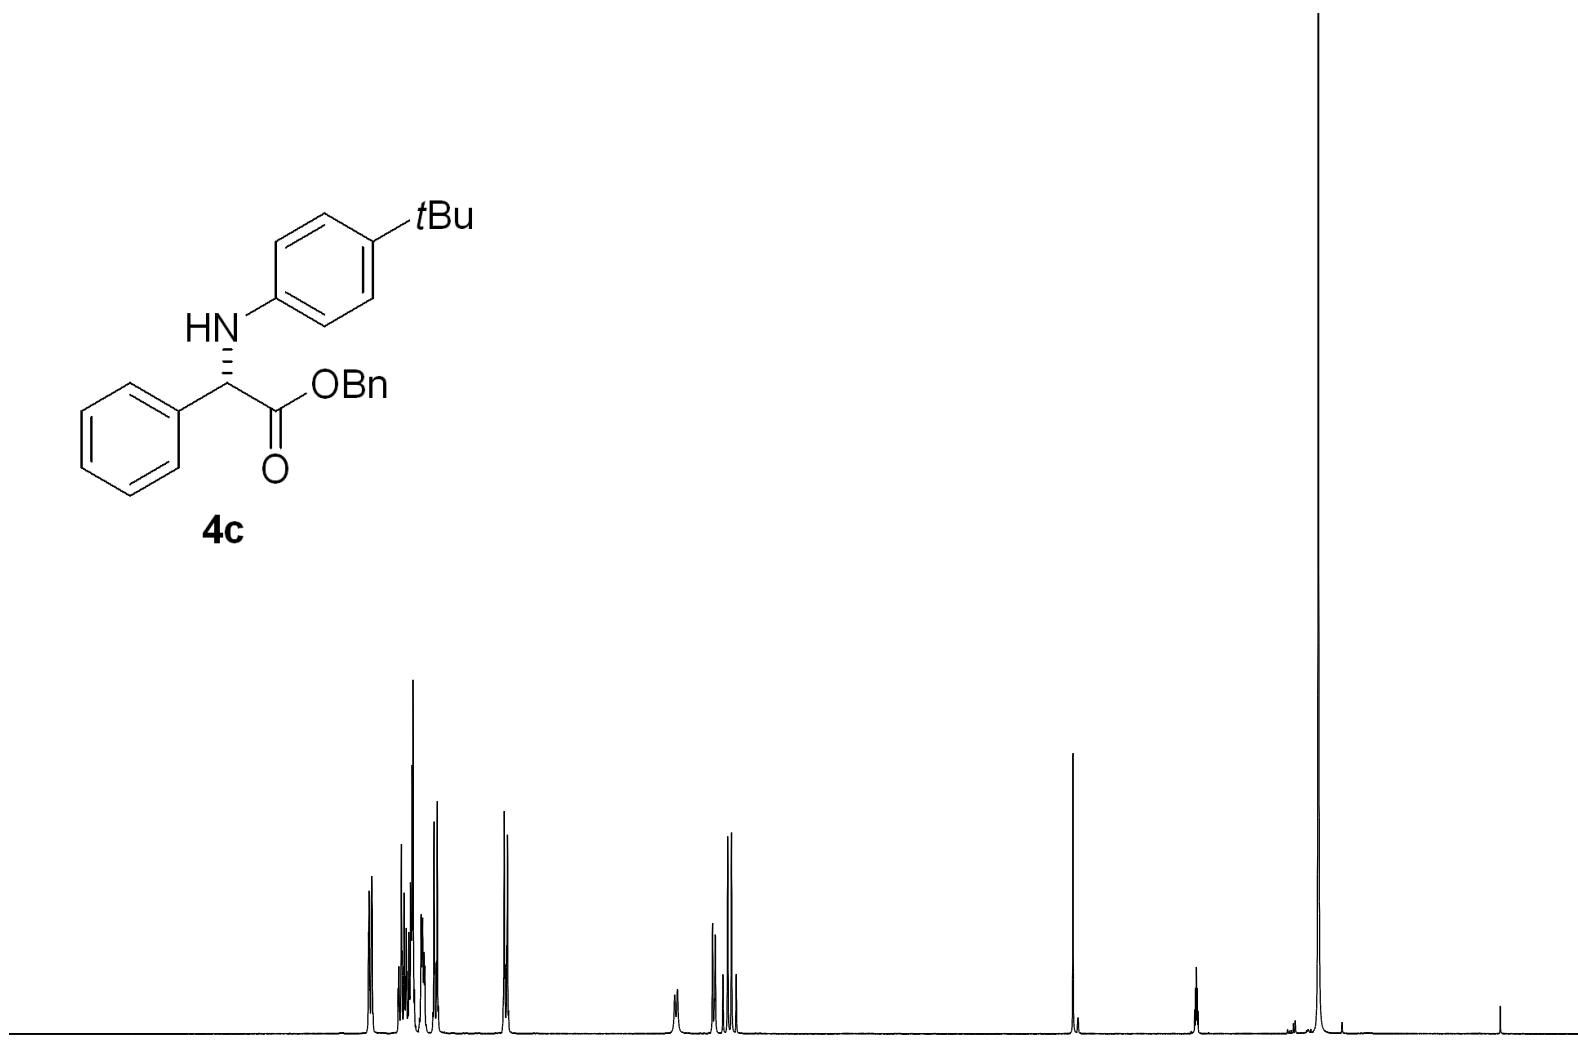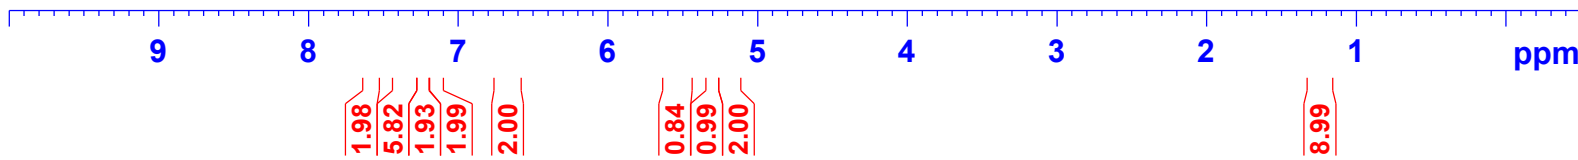

**BRUKER**

```

NAME      HNMR-gwg-9-17-1
EXPNO     1
PROCNO    1
Date_     20201001
Time      19.48
INSTRUM   spect
PROBHD    5 mm PABBO BB/
PULPROG   zg30
TD         65536
SOLVENT   Acetone
NS         4
DS         0
SWH       8012.820 Hz
FIDRES    0.122266 Hz
AQ         4.0894966 sec
RG         27.78
DW         62.400 usec
DE         6.50 usec
TE         297.9 K
D1         1.00000000 sec
TD0        1

===== CHANNEL f1 =====
SFO1      400.1324710 MHz
NUC1       1H
P1         14.50 usec
SI         65536
SF         400.1300000 MHz
WDW        EM
SSB         0
LB         0.30 Hz
GB         0
PC         1.00
  
```



NAME CNMR-gwg-9-17-1  
EXPNO 1  
PROCNO 1  
Date\_ 20201001  
Time\_ 19.51  
INSTRUM spect  
PROBHD 5 mm PABBO BB/  
PULPROG zgpg30  
TD 65536  
SOLVENT Acetone  
NS 16  
DS 0  
SWH 24038.461 Hz  
FIDRES 0.366798 Hz  
AQ 1.3631988 sec  
RG 196.92  
DW 20.800 usec  
DE 6.50 usec  
TE 298.5 K  
D1 2.00000000 sec  
D11 0.03000000 sec  
TD0 1

==== CHANNEL f1 =====  
SFO1 100.6228298 MHz  
NUC1 13C  
P1 9.70 usec  
SI 32768  
SF 100.6127690 MHz  
WDW EM  
SSB 0  
LB 1.00 Hz  
GB 0  
PC 1.40

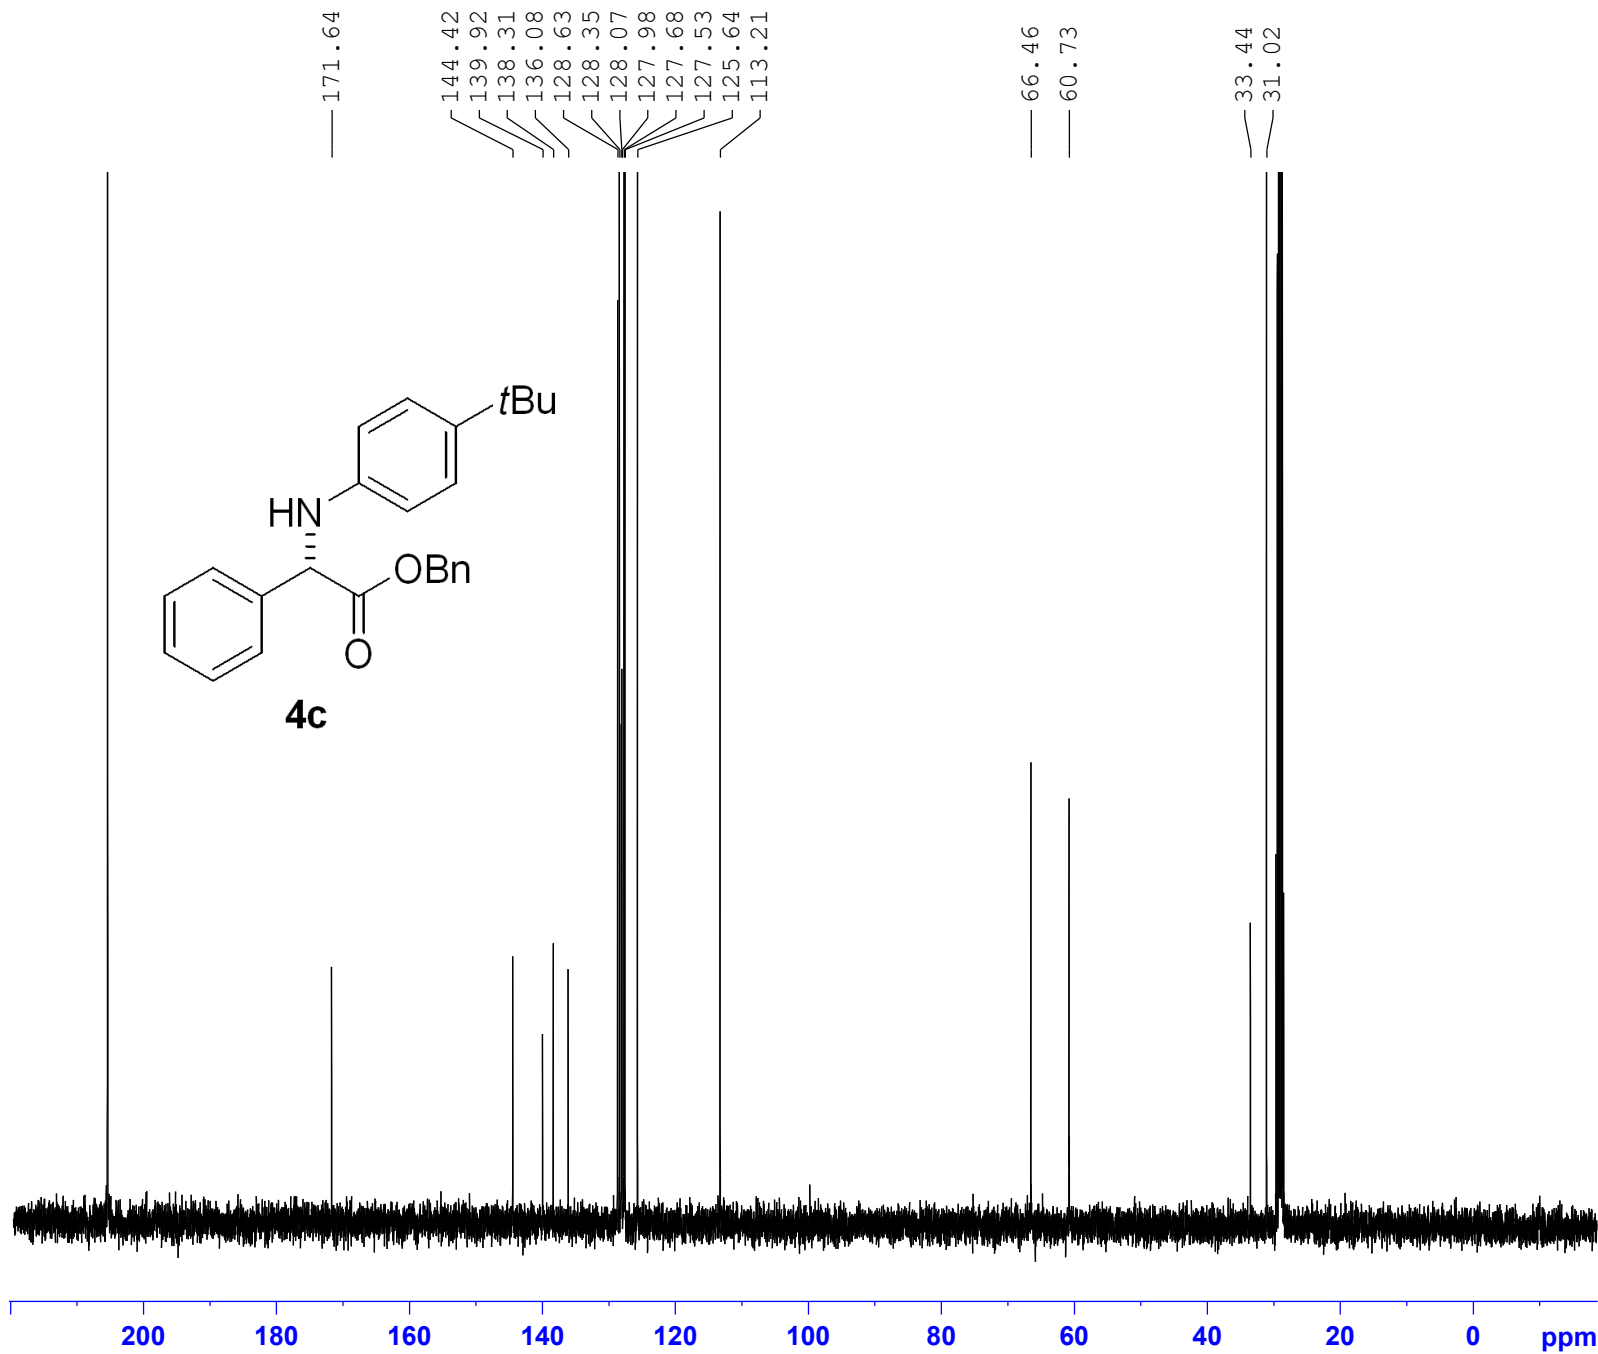



7.40  
7.39  
7.38  
7.38  
7.37  
7.36  
7.36  
7.35  
7.35  
7.34  
7.34  
7.33  
7.33  
7.32  
7.32  
7.31  
7.31  
7.30  
7.26  
7.25  
7.25  
7.24  
7.23  
7.23  
7.22  
7.11  
7.10  
7.09  
7.08  
7.07  
6.77  
6.76  
6.75  
6.74  
6.74  
6.73  
5.92  
5.90  
5.33  
5.31  
5.31  
5.24  
5.21  
5.17  
5.14

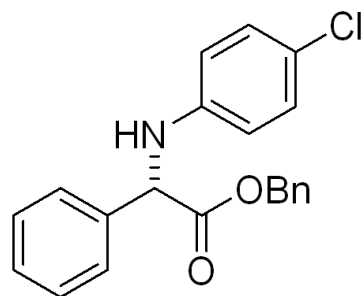

4d

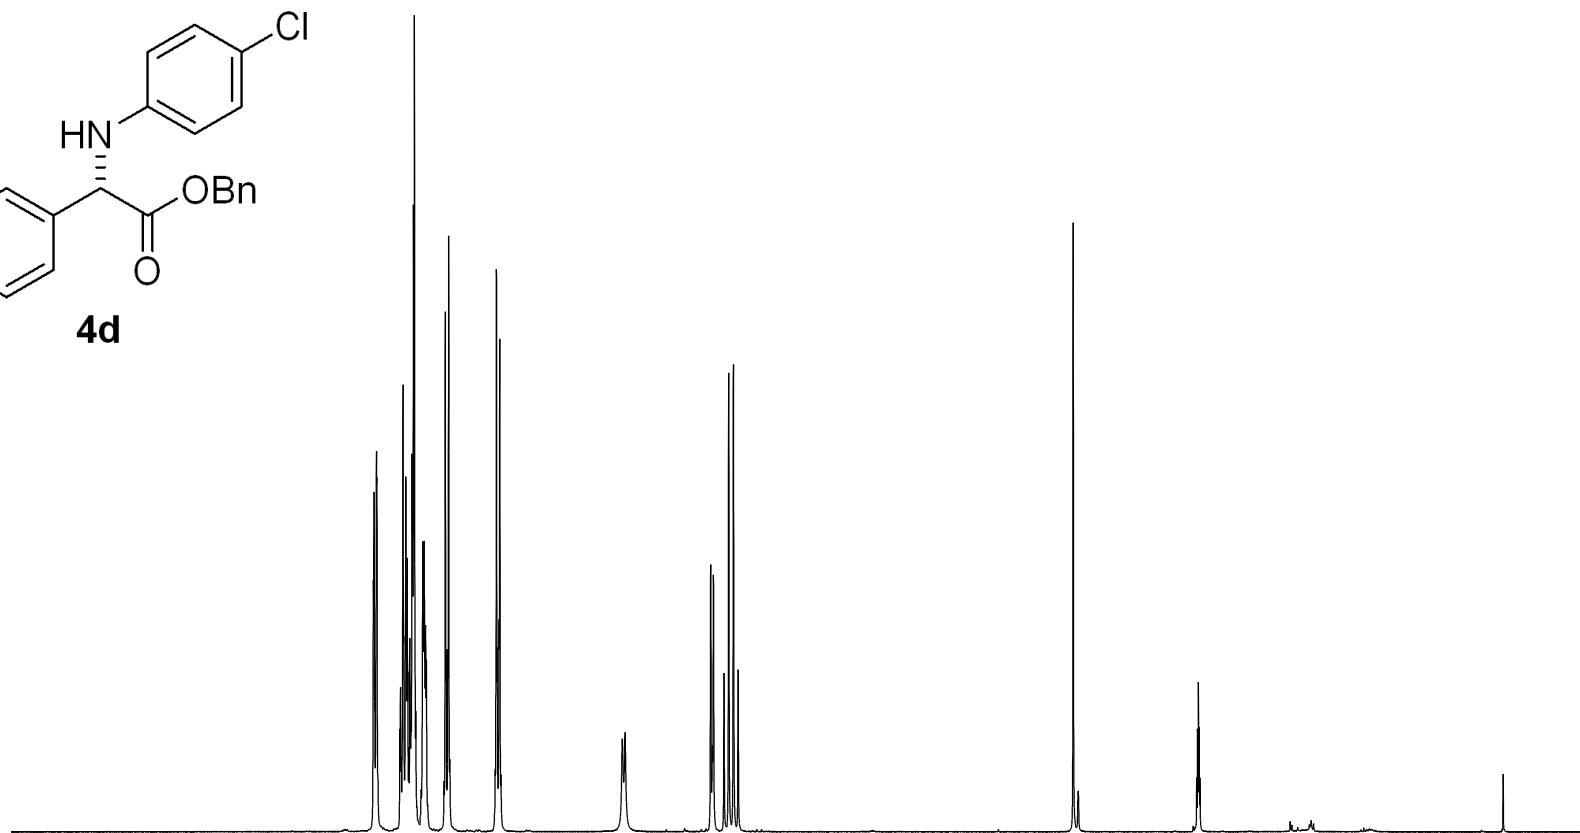

1.99  
5.90  
1.94  
1.99  
2.00

0.84

1.00  
2.01

NAME HNMR-gwg-9-18-1  
EXPNO 1  
PROCNO 1  
Date\_ 20201001  
Time\_ 19.54  
INSTRUM spect  
PROBHD 5 mm PABBO BB/  
PULPROG zg30  
TD 65536  
SOLVENT Acetone  
NS 1  
DS 0  
SWH 8012.820 Hz  
FIDRES 0.122266 Hz  
AQ 4.0894966 sec  
RG 34.77  
DW 62.400 usec  
DE 6.50 usec  
TE 298.0 K  
D1 1.00000000 sec  
TD0 1

==== CHANNEL f1 =====  
SFO1 400.1324710 MHz  
NUC1 1H  
P1 14.50 usec  
SI 65536  
SF 400.1300000 MHz  
WDW EM  
SSB 0  
LB 0.30 Hz  
GB 0  
PC 1.00

9 8 7 6 5 4 3 2 1 ppm



NAME CNMR-gwg-9-18-1  
EXPNO 1  
PROCNO 1  
Date\_ 20201001  
Time\_ 19.55  
INSTRUM spect  
PROBHD 5 mm PABBO BB/  
PULPROG zgpg30  
TD 65536  
SOLVENT Acetone  
NS 10  
DS 0  
SWH 24038.461 Hz  
FIDRES 0.366798 Hz  
AQ 1.3631988 sec  
RG 196.92  
DW 20.800 usec  
DE 6.50 usec  
TE 298.3 K  
D1 2.00000000 sec  
D11 0.03000000 sec  
TD0 1

==== CHANNEL f1 =====  
SF01 100.6228298 MHz  
NUC1 13C  
P1 9.70 usec  
SI 32768  
SF 100.6127690 MHz  
WDW EM  
SSB 0  
LB 1.00 Hz  
GB 0  
PC 1.40

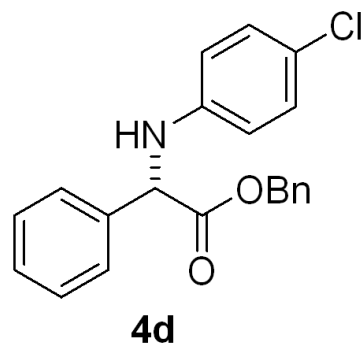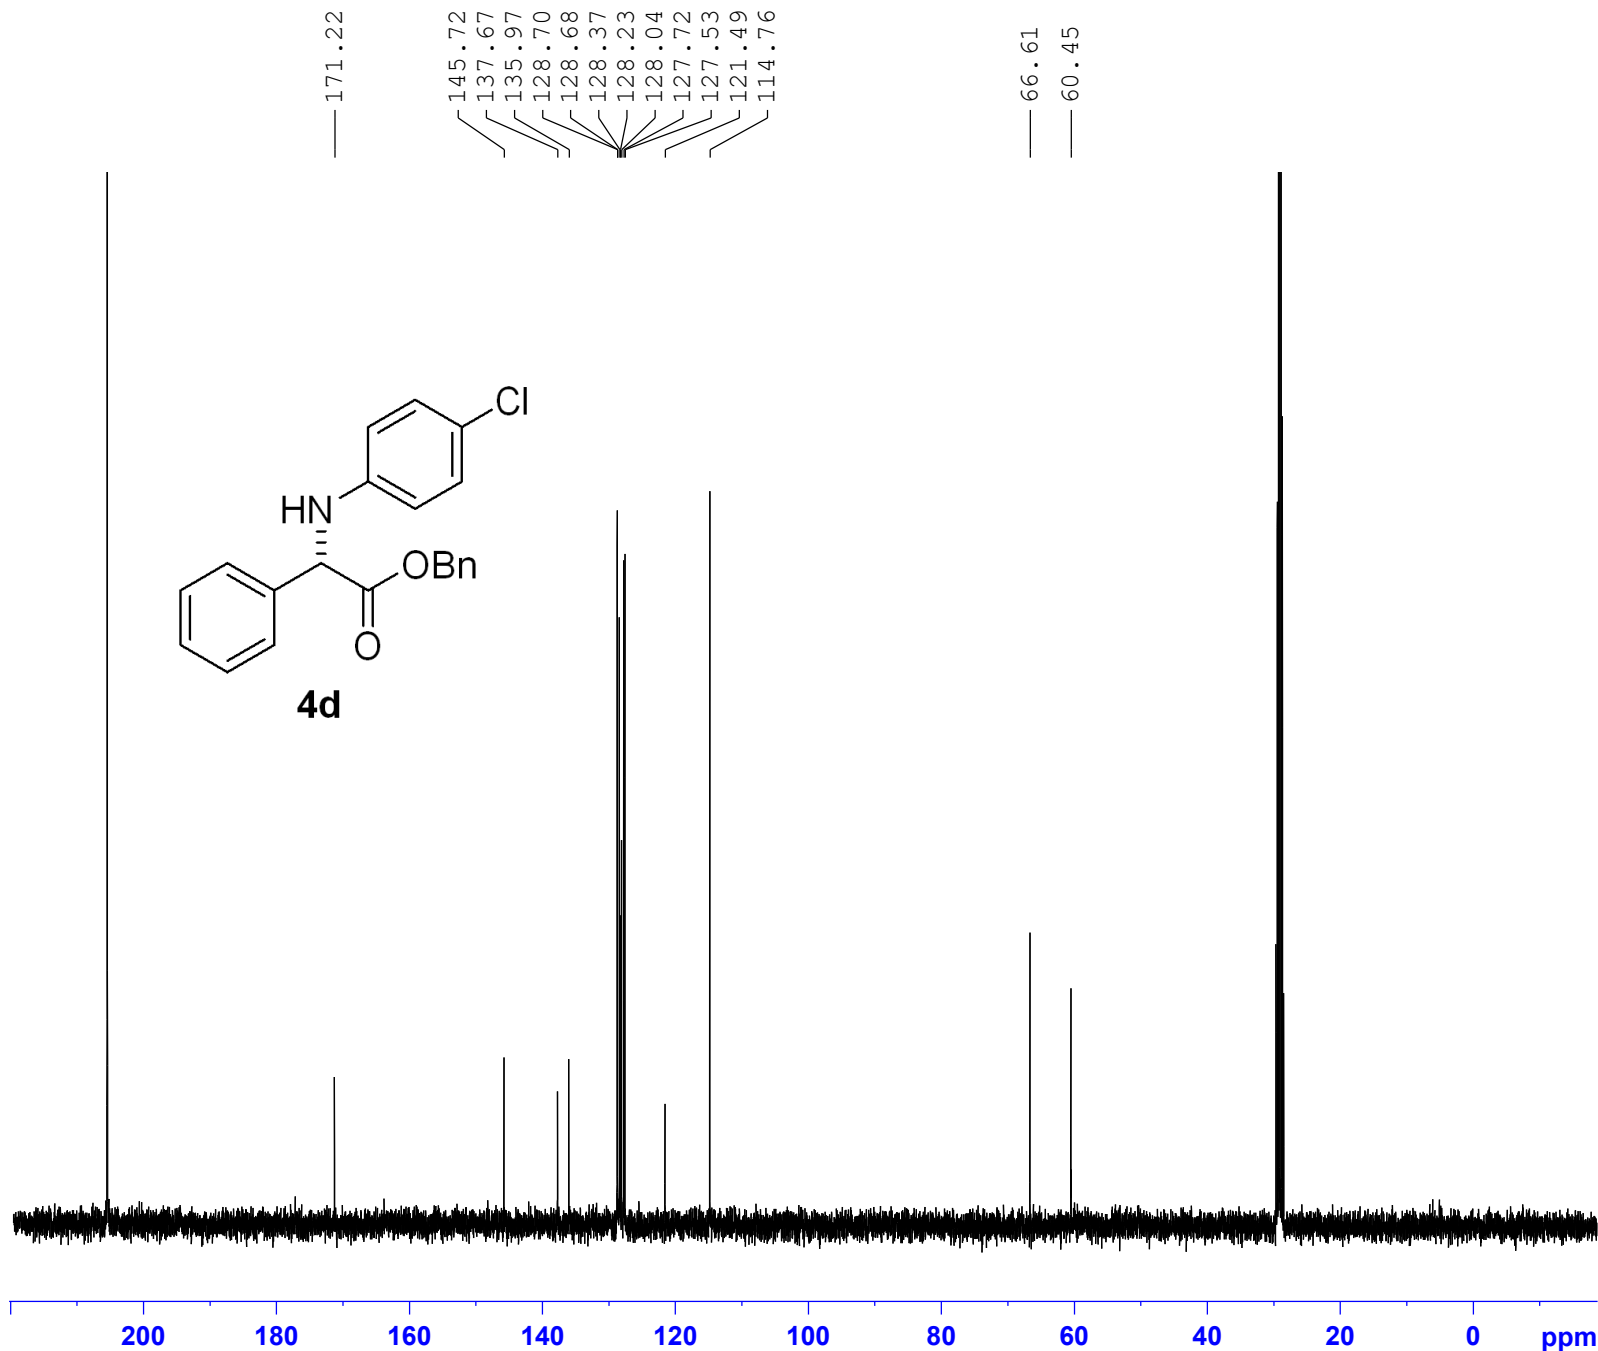



7.54  
7.53  
7.52  
7.45  
7.44  
7.43  
7.43  
7.42  
7.42  
7.42  
7.40  
7.40  
7.40  
7.39  
7.39  
7.38  
7.37  
7.36  
7.36  
7.35  
7.35  
7.35  
7.34  
7.34  
7.33  
7.33  
7.24  
7.23  
7.23  
7.22  
7.22  
7.21  
7.21  
6.66  
6.63  
5.50  
5.48  
5.27  
5.24  
5.24  
5.23  
5.19  
5.16

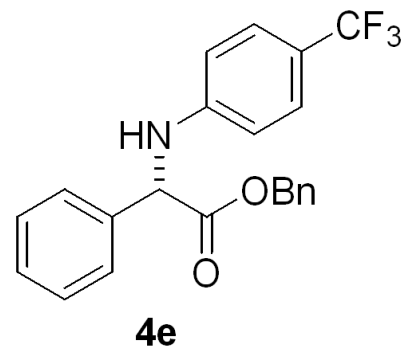

NAME HNMR-gwg-9-28-1  
EXPNO 1  
PROCNO 1  
Date\_ 20201008  
Time\_ 19.01  
INSTRUM spect  
PROBHD 5 mm PABBO BB/  
PULPROG zg30  
TD 65536  
SOLVENT CD2Cl2  
NS 4  
DS 0  
SWH 8012.820 Hz  
FIDRES 0.122266 Hz  
AQ 4.0894966 sec  
RG 82.92  
DW 62.400 usec  
DE 6.50 usec  
TE 296.0 K  
D1 1.00000000 sec  
TD0 1

==== CHANNEL f1 =====  
SFO1 400.1324710 MHz  
NUC1 1H  
P1 14.50 usec  
SI 65536  
SF 400.1300000 MHz  
WDW EM  
SSB 0  
LB 0.30 Hz  
GB 0  
PC 1.00

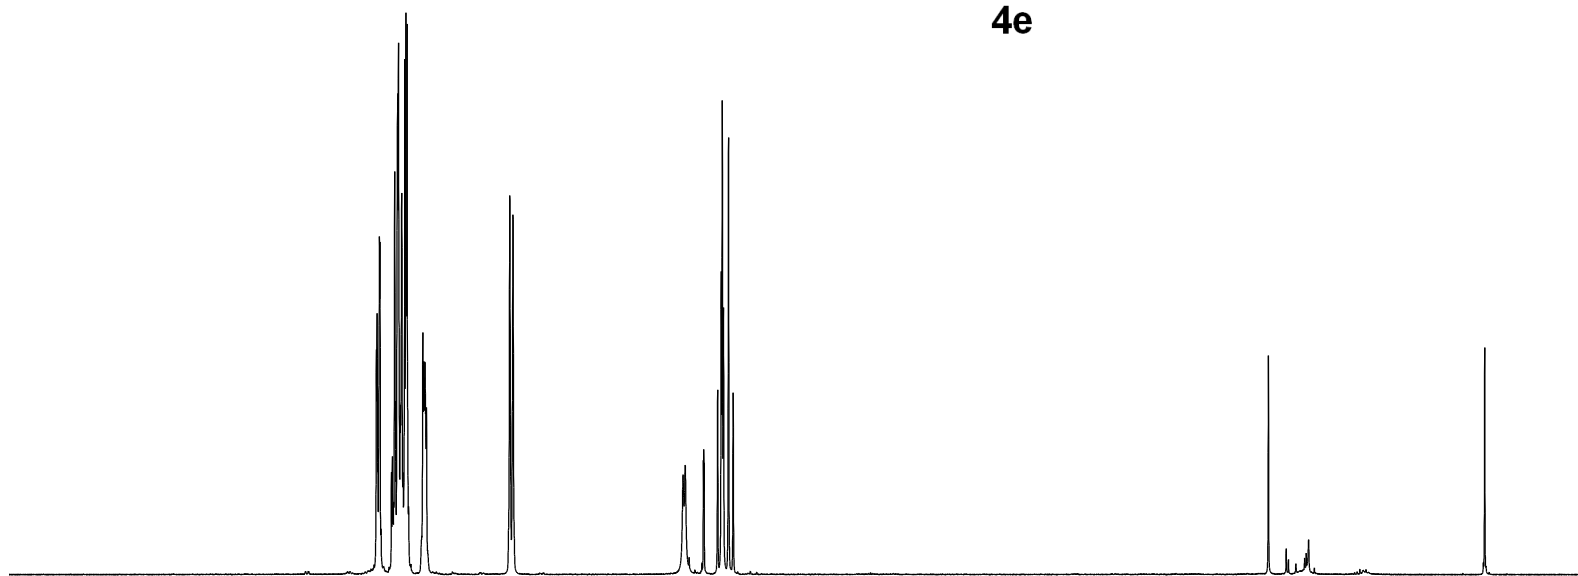

2.06  
7.80  
1.91

2.06

1.00  
3.08



NAME CNMR-gwg-9-28-1  
EXPNO 1  
PROCNO 1  
Date\_ 20201010  
Time\_ 10.00  
INSTRUM spect  
PROBHD 5 mm PABBO BB/  
PULPROG zgpg30  
TD 65536  
SOLVENT CD2Cl2  
NS 415  
DS 0  
SWH 24038.461 Hz  
FIDRES 0.366798 Hz  
AQ 1.3631988 sec  
RG 196.92  
DW 20.800 usec  
DE 6.50 usec  
TE 297.8 K  
D1 2.00000000 sec  
D11 0.03000000 sec  
TD0 1

==== CHANNEL f1 =====  
SF01 100.6228298 MHz  
NUC1 13C  
P1 9.70 usec  
SI 32768  
SF 100.6127690 MHz  
WDW EM  
SSB 0  
LB 1.00 Hz  
GB 0  
PC 1.40

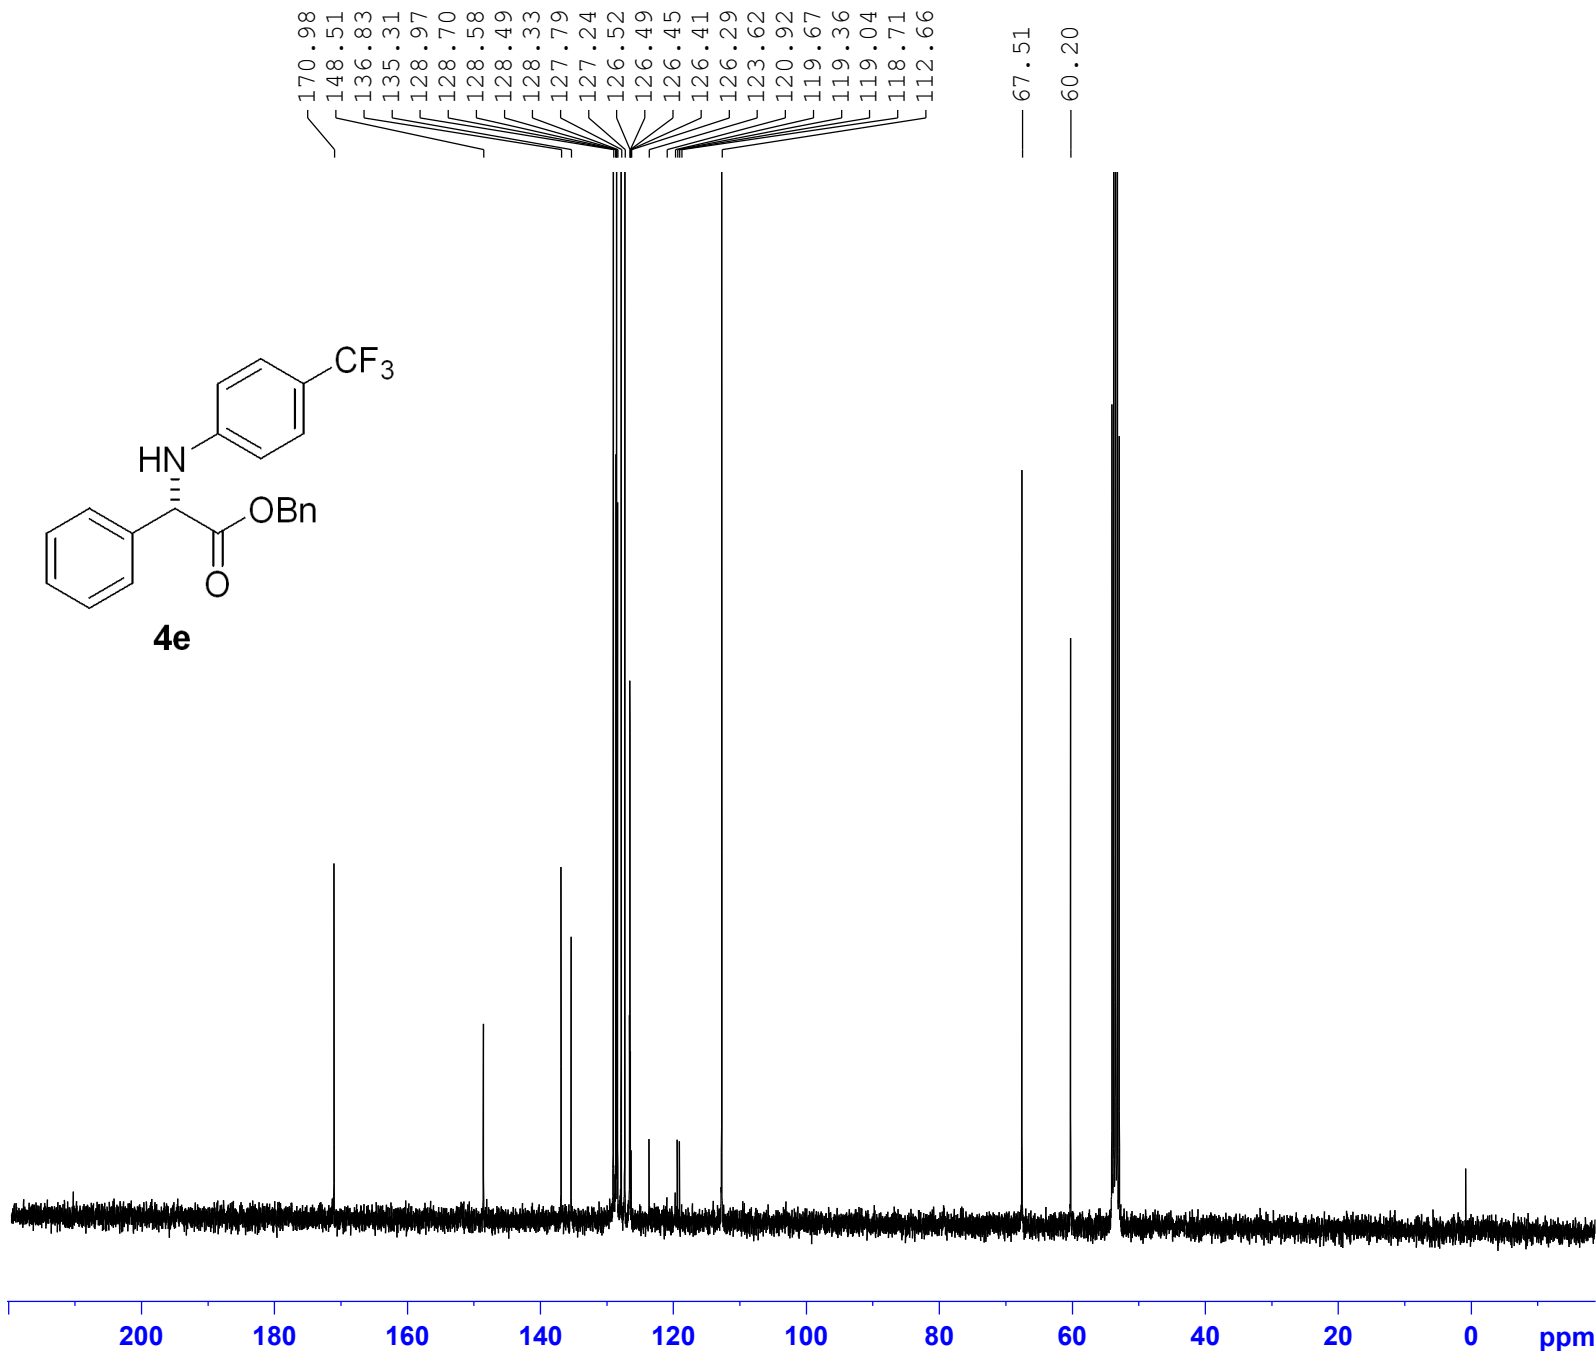



NAME FNMR-gwg-9-28-1  
EXPNO 1  
PROCNO 1  
Date\_ 20201008  
Time\_ 19.03  
INSTRUM spect  
PROBHD 5 mm PABBO BB/  
PULPROG zgpg30  
TD 65536  
SOLVENT CD2Cl2  
NS 4  
DS 0  
SWH 93750.000 Hz  
FIDRES 1.430511 Hz  
AQ 0.3495753 sec  
RG 196.92  
DW 5.333 usec  
DE 6.50 usec  
TE 296.1 K  
D1 2.00000000 sec  
D11 0.03000000 sec  
TD0 1

==== CHANNEL f1 =====  
SFO1 376.4607162 MHz  
NUC1 19F  
P1 14.70 usec  
SI 32768  
SF 376.4983660 MHz  
WDW EM  
SSB 0  
LB 1.00 Hz  
GB 0  
PC 1.40

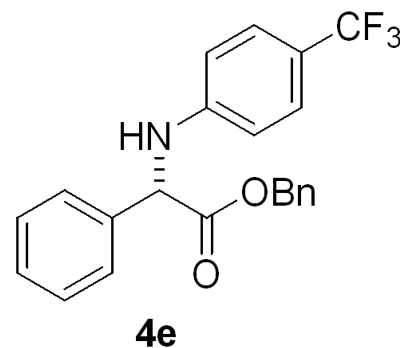

— -61.41

20 0 -20 -40 -60 -80 -100 -120 -140 -160 -180 -200 ppm



NAME HNMR-gwg-9-50-1  
EXPNO 1  
PROCNO 1  
Date\_ 20201015  
Time\_ 19.20  
INSTRUM spect  
PROBHD 5 mm PABBO BB/  
PULPROG zg30  
TD 65536  
SOLVENT Acetone  
NS 4  
DS 0  
SWH 8012.820 Hz  
FIDRES 0.122266 Hz  
AQ 4.0894966 sec  
RG 31.55  
DW 62.400 usec  
DE 6.50 usec  
TE 296.7 K  
D1 1.00000000 sec  
TD0 1

==== CHANNEL f1 =====  
SFO1 400.1324710 MHz  
NUC1 1H  
P1 14.50 usec  
SI 65536  
SF 400.1300000 MHz  
WDW EM  
SSB 0  
LB 0.30 Hz  
GB 0  
PC 1.00

7.57  
7.56  
7.55  
7.46  
7.46  
7.43  
7.43  
7.42  
7.42  
7.40  
7.40  
7.38  
7.37  
7.37  
7.36  
7.36  
7.35  
7.34  
7.33  
7.33  
6.86  
6.85  
6.85  
6.84  
6.83  
6.82  
6.61  
6.59  
5.38  
5.36

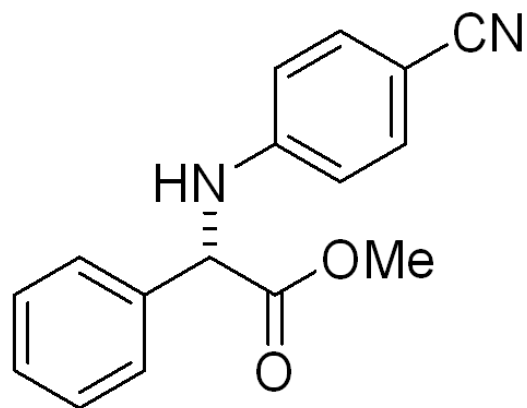

4f

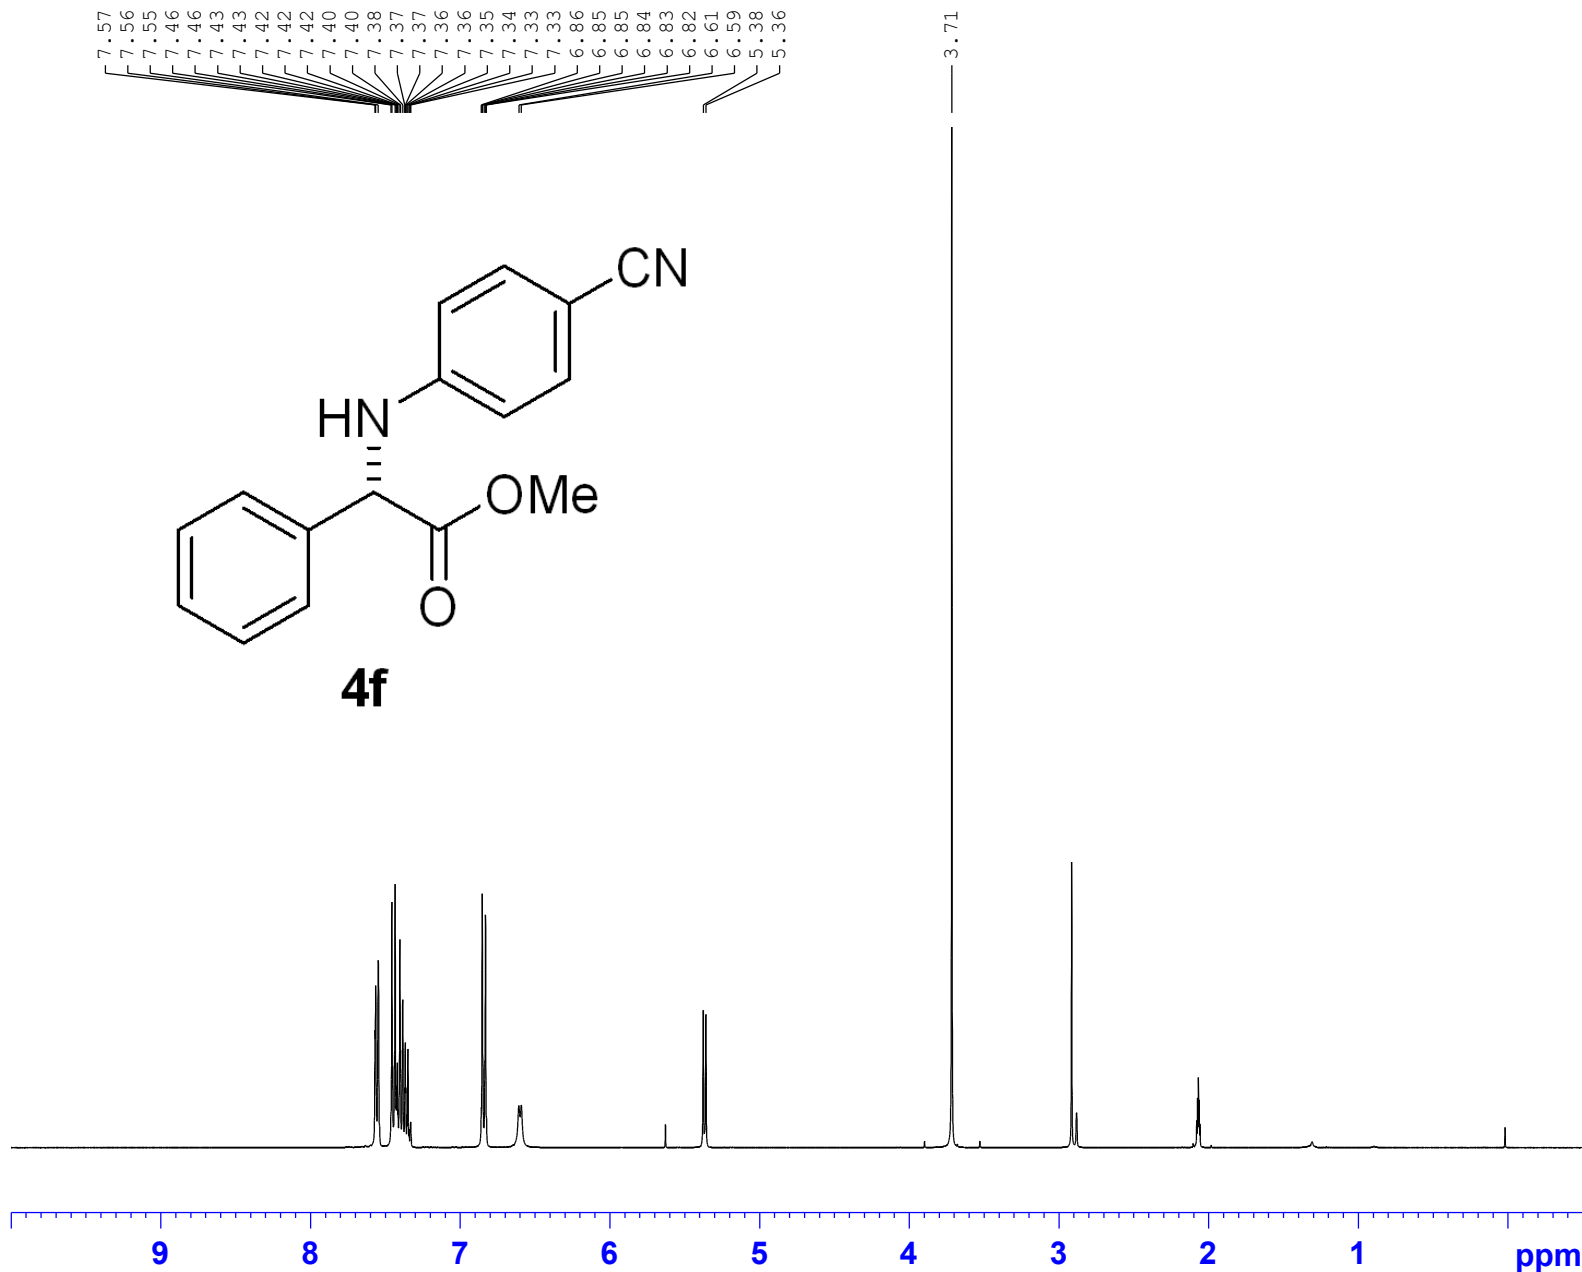

2.01  
4.91

2.00  
0.96

1.00

2.98





NAME CNMR-gwg-9-50-1  
EXPNO 1  
PROCNO 1  
Date\_ 20201015  
Time\_ 19.22  
INSTRUM spect  
PROBHD 5 mm PABBO BB/  
PULPROG zgpg30  
TD 65536  
SOLVENT Acetone  
NS 18  
DS 0  
SWH 24038.461 Hz  
FIDRES 0.366798 Hz  
AQ 1.3631988 sec  
RG 196.92  
DW 20.800 usec  
DE 6.50 usec  
TE 297.2 K  
D1 2.00000000 sec  
D11 0.03000000 sec  
TD0 1

===== CHANNEL f1 =====  
SF01 100.6228298 MHz  
NUC1 13C  
P1 9.70 usec  
SI 32768  
SF 100.6127690 MHz  
WDW EM  
SSB 0  
LB 1.00 Hz  
GB 0  
PC 1.40

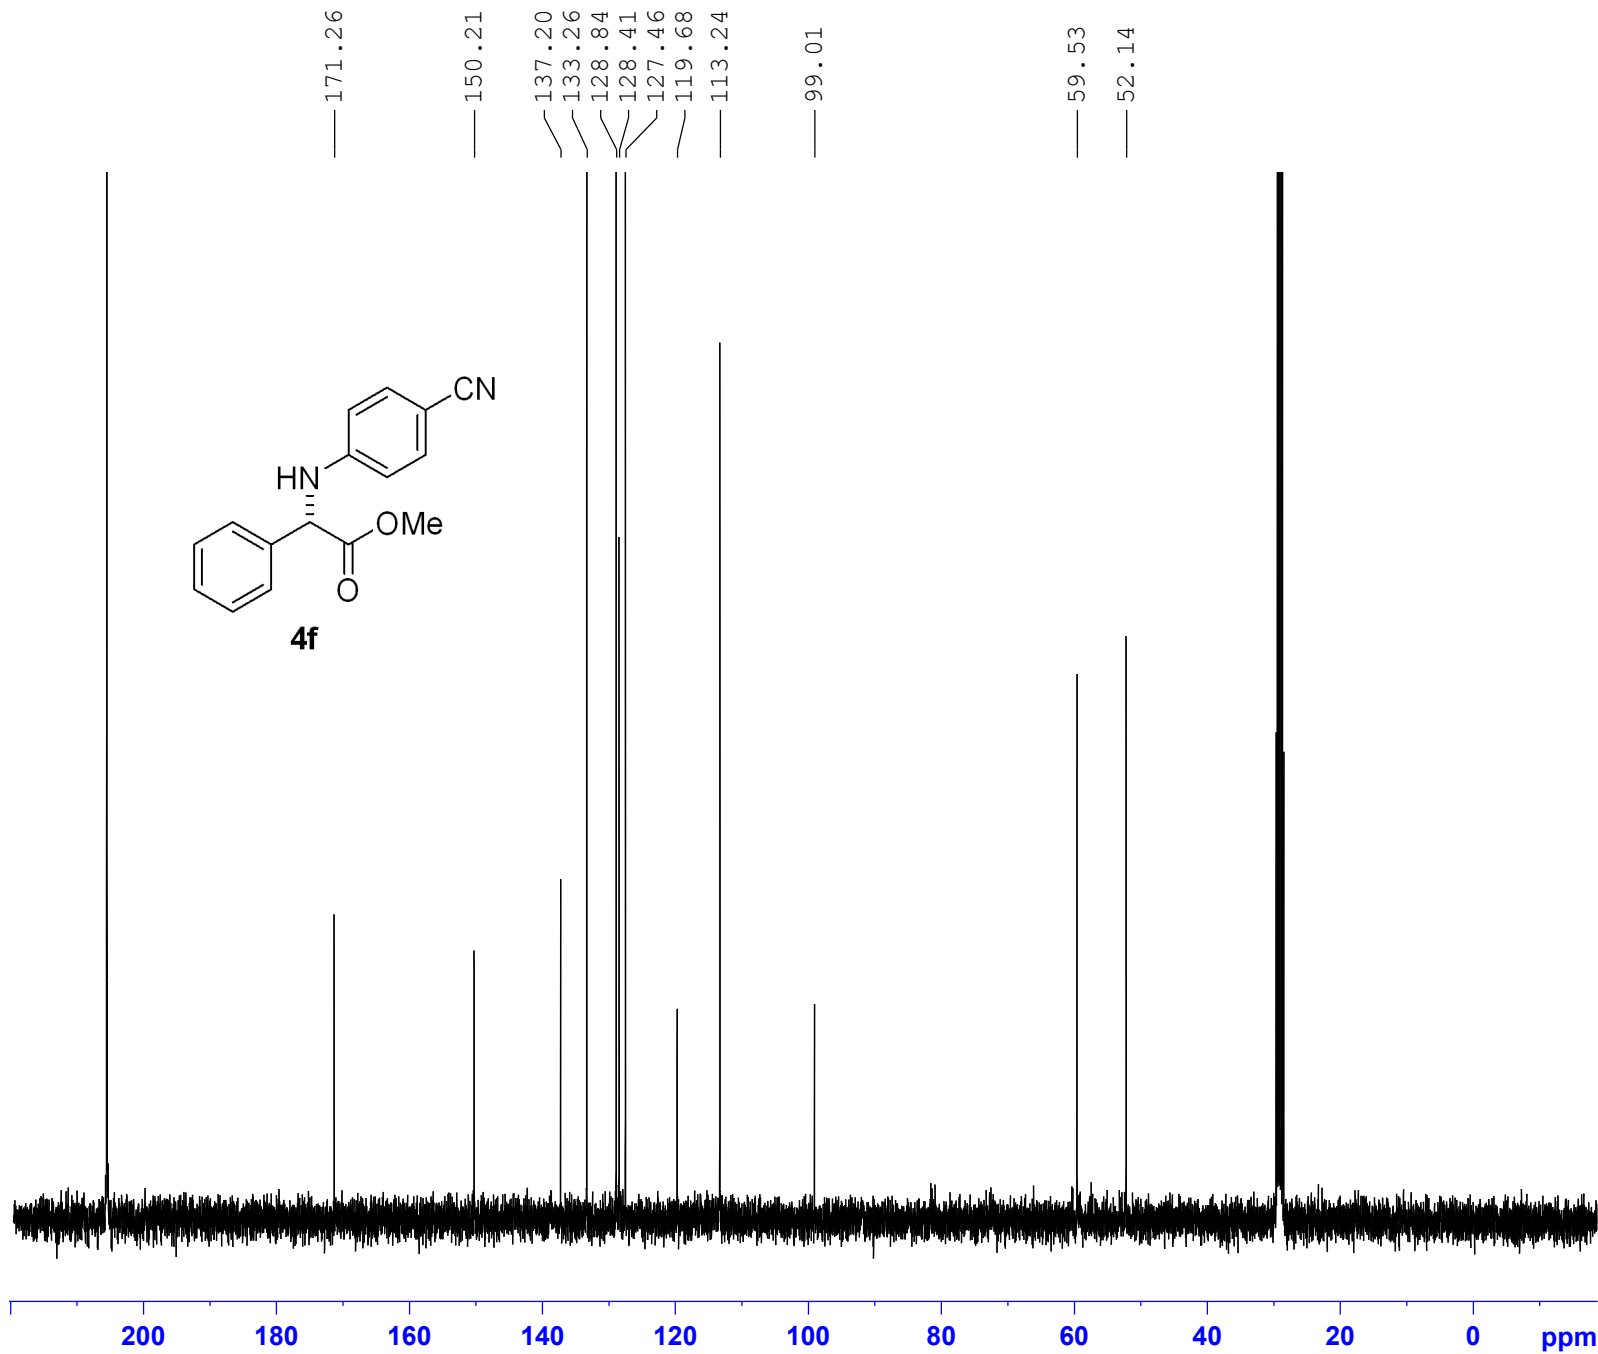



NAME HNMR-lsj-1-18  
EXPNO 1  
PROCNO 1  
Date\_ 20201011  
Time\_ 17.19  
INSTRUM spect  
PROBHD 5 mm PABBO BB/  
PULPROG zg30  
TD 65536  
SOLVENT CD2Cl2  
NS 8  
DS 2  
SWH 8012.820 Hz  
FIDRES 0.122266 Hz  
AQ 4.0894966 sec  
RG 49.32  
DW 62.400 usec  
DE 6.50 usec  
TE 296.6 K  
D1 1.00000000 sec  
TD0 1

==== CHANNEL f1 =====  
SFO1 400.1324710 MHz  
NUC1 1H  
P1 14.50 usec  
SI 65536  
SF 400.1300000 MHz  
WDW EM  
SSB 0  
LB 0.30 Hz  
GB 0  
PC 1.00

7.84  
7.84  
7.83  
7.82  
7.81  
7.81  
7.54  
7.54  
7.53  
7.52  
7.51  
7.44  
7.44  
7.43  
7.42  
7.42  
7.41  
7.40  
7.40  
7.39  
7.39  
7.38  
7.37  
7.36  
7.36  
6.61  
6.61  
6.59  
6.59  
5.61  
5.59  
5.22  
5.20  
  
3.83  
3.77

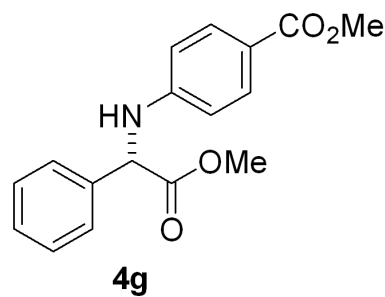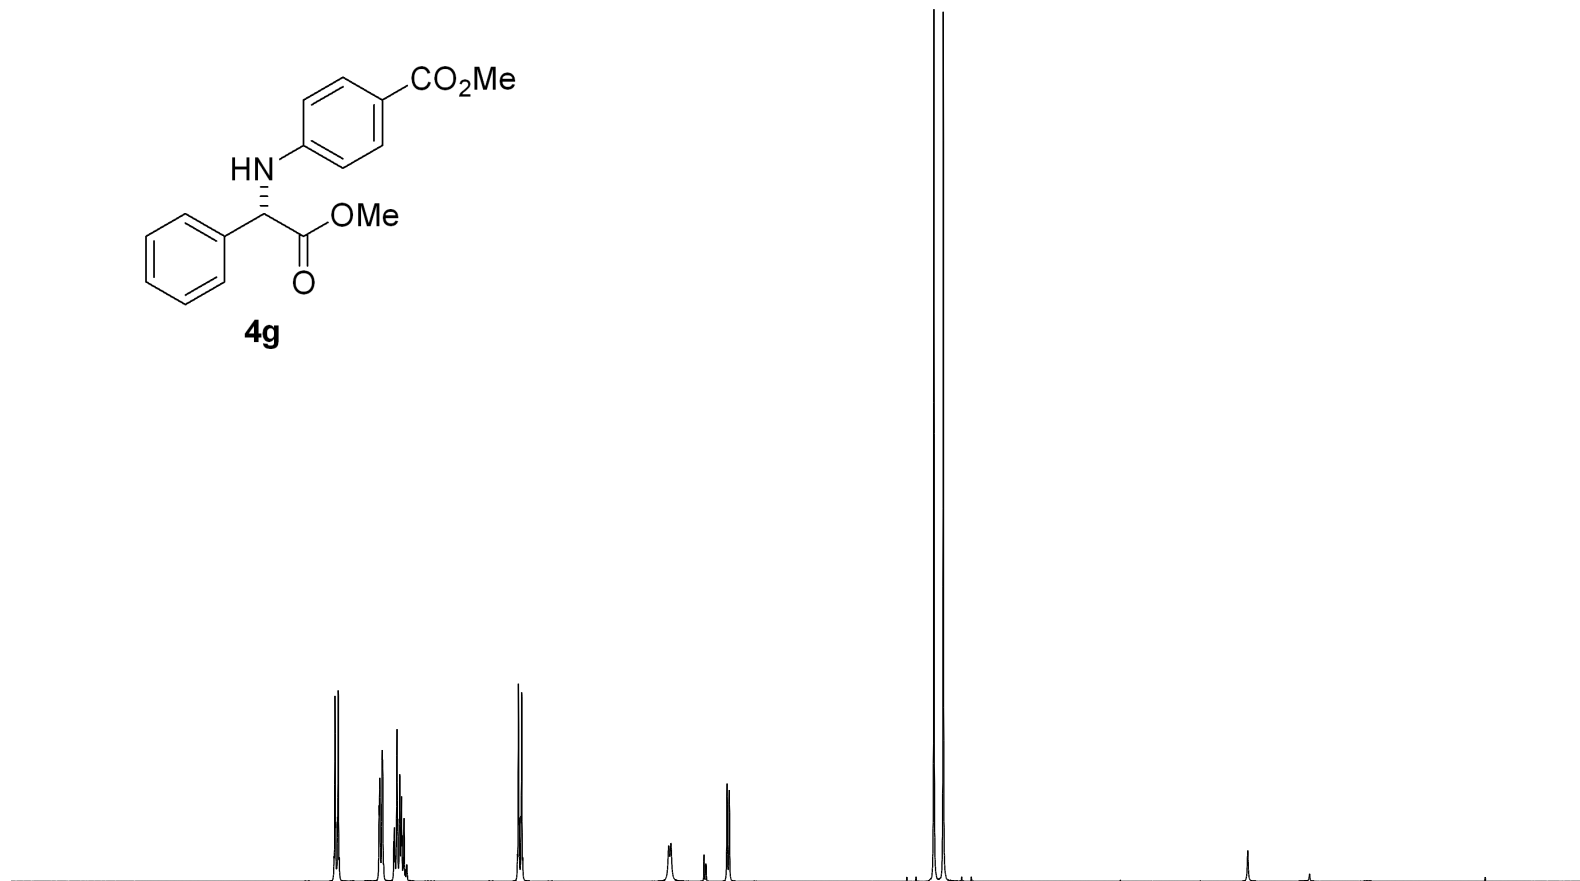

1.94  
1.95  
2.93  
2.02  
0.96  
1.00  
2.94  
2.98



NAME CNMR-lsj-1-18  
EXPNO 1  
PROCNO 1  
Date\_ 20201011  
Time\_ 17.24  
INSTRUM spect  
PROBHD 5 mm PABBO BB/  
PULPROG zgpg30  
TD 65536  
SOLVENT CD2Cl2  
NS 82  
DS 2  
SWH 24038.461 Hz  
FIDRES 0.366798 Hz  
AQ 1.3631988 sec  
RG 196.92  
DW 20.800 usec  
DE 6.50 usec  
TE 297.0 K  
D1 2.00000000 sec  
D11 0.03000000 sec  
TD0 1

==== CHANNEL f1 =====  
SF01 100.6228298 MHz  
NUC1 13C  
P1 9.70 usec  
SI 32768  
SF 100.6127690 MHz  
WDW EM  
SSB 0  
LB 1.00 Hz  
GB 0  
PC 1.40

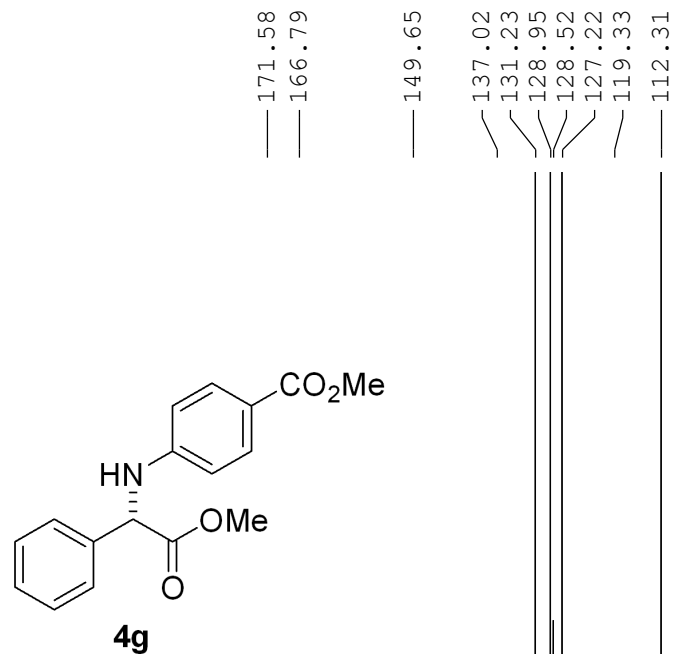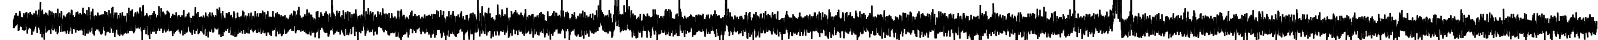

200 180 160 140 120 100 80 60 40 20 0 ppm



NAME HNMR-gwg-9-20-1  
EXPNO 1  
PROCNO 1  
Date\_ 20201001  
Time\_ 19.58  
INSTRUM spect  
PROBHD 5 mm PABBO BB/  
PULPROG zg30  
TD 65536  
SOLVENT Acetone  
NS 4  
DS 0  
SWH 8012.820 Hz  
FIDRES 0.122266 Hz  
AQ 4.0894966 sec  
RG 31.55  
DW 62.400 usec  
DE 6.50 usec  
TE 298.0 K  
D1 1.00000000 sec  
TD0 1

==== CHANNEL f1 =====  
SFO1 400.1324710 MHz  
NUC1 1H  
P1 14.50 usec  
SI 65536  
SF 400.1300000 MHz  
WDW EM  
SSB 0  
LB 0.30 Hz  
GB 0  
PC 1.00

7.56  
7.41  
7.40  
7.39  
7.38  
7.37  
7.36  
7.35  
7.34  
7.33  
7.32  
7.32  
7.31  
7.30  
7.29  
7.25  
7.24  
7.23  
7.22  
6.74  
6.74  
6.71  
6.70  
6.66  
6.64  
6.61  
6.53  
6.53  
6.52  
6.52  
6.51  
6.51  
6.50  
6.50  
5.33  
5.31  
5.24  
5.21  
5.19  
5.16  
5.07  
5.06  
3.69

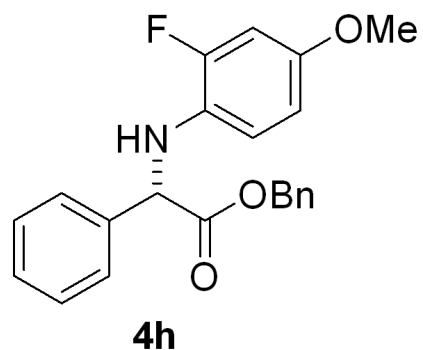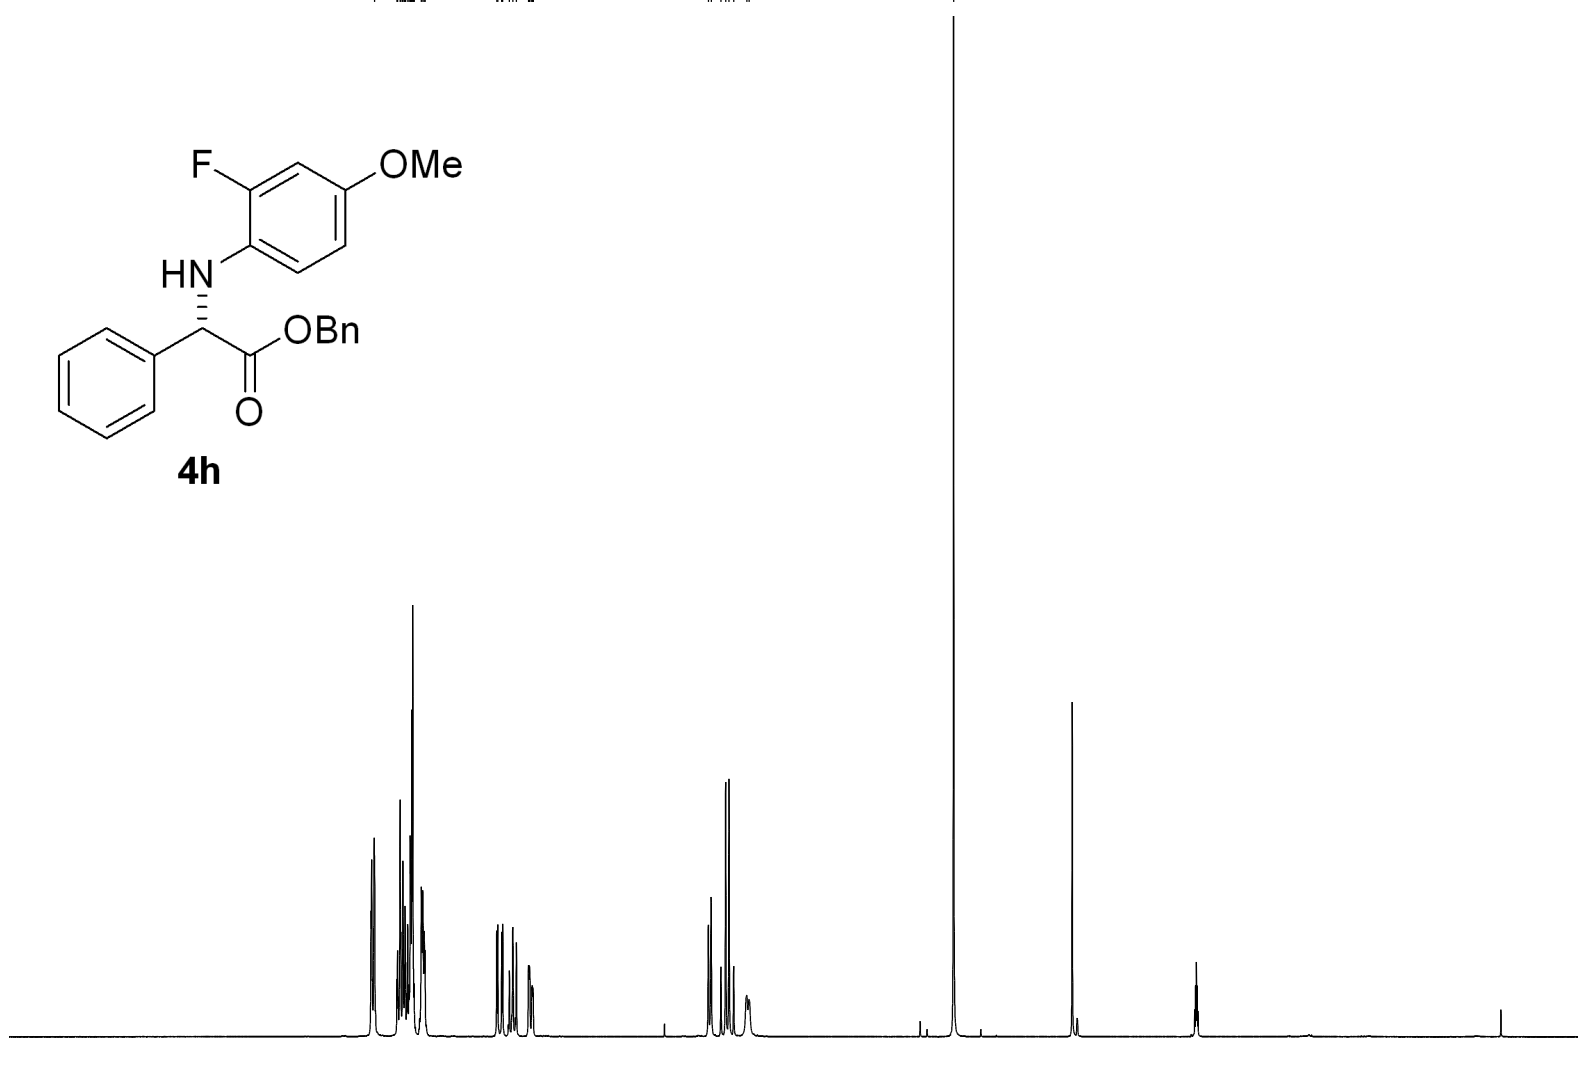

9 8 7 6 5 4 3 2 1 ppm

2.00  
5.90  
1.93  
0.99  
1.00  
0.99  
1.00  
2.04  
0.84  
3.00



NAME CNMR-gwg-9-20-1  
EXPNO 1  
PROCNO 1  
Date\_ 20201001  
Time\_ 20.00  
INSTRUM spect  
PROBHD 5 mm PABBO BB/  
PULPROG zgpg30  
TD 65536  
SOLVENT Acetone  
NS 33  
DS 0  
SWH 24038.461 Hz  
FIDRES 0.366798 Hz  
AQ 1.3631988 sec  
RG 196.92  
DW 20.800 usec  
DE 6.50 usec  
TE 298.5 K  
D1 2.00000000 sec  
D11 0.03000000 sec  
TD0 1

===== CHANNEL f1 =====  
SFO1 100.6228298 MHz  
NUC1 13C  
P1 9.70 usec  
SI 32768  
SF 100.6127690 MHz  
WDW EM  
SSB 0  
LB 1.00 Hz  
GB 0  
PC 1.40

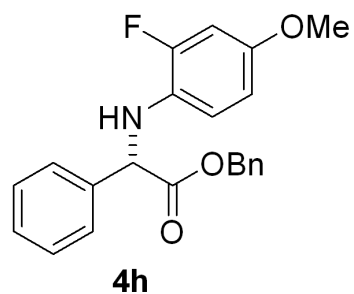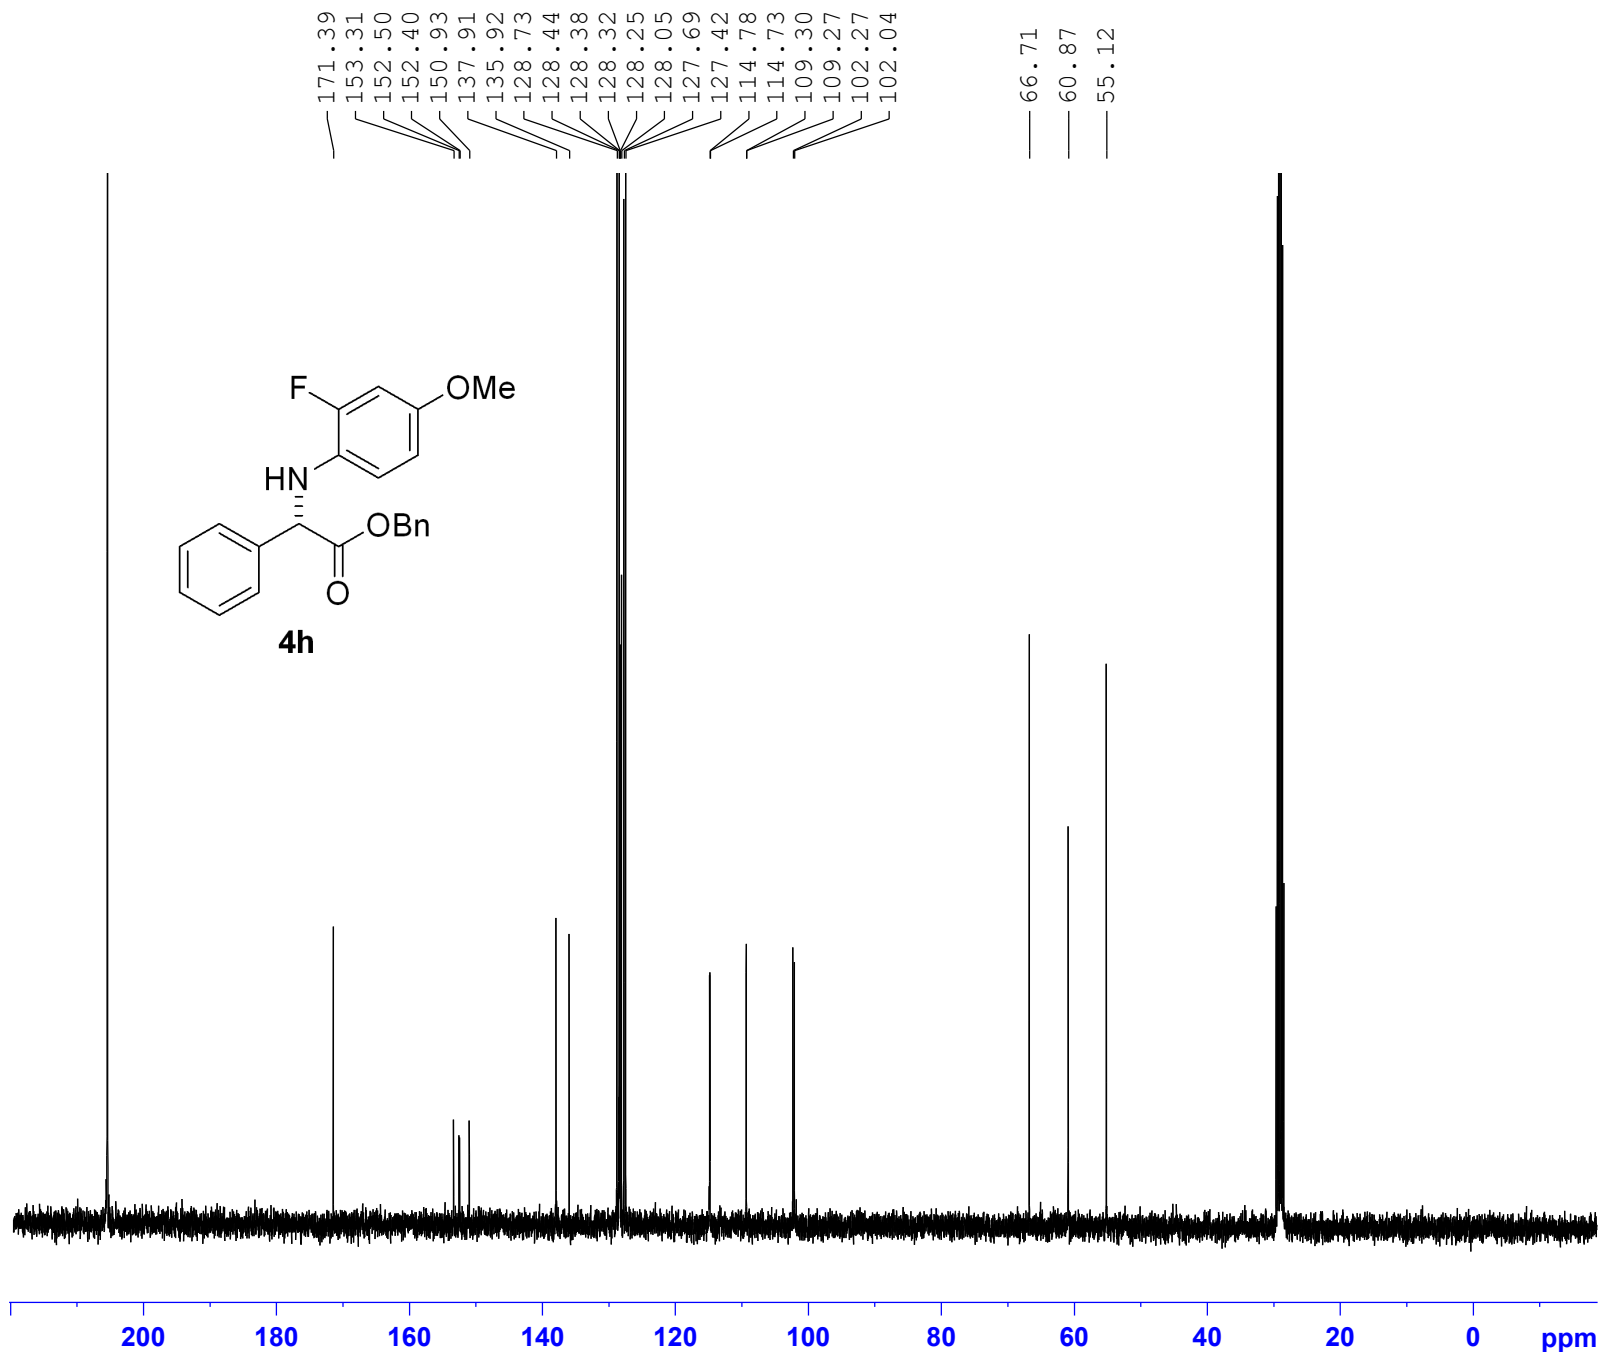

— -133.37

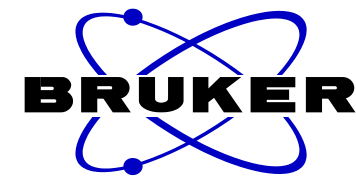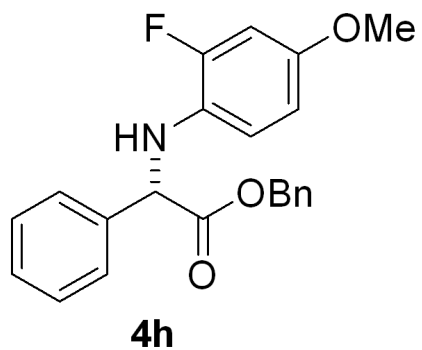

NAME FNMR-gwg-9-20-1  
EXPNO 1  
PROCNO 1  
Date\_ 20201001  
Time\_ 20.03  
INSTRUM spect  
PROBHD 5 mm PABBO BB/  
PULPROG zgpg30  
TD 65536  
SOLVENT Acetone  
NS 1  
DS 0  
SWH 93750.000 Hz  
FIDRES 1.430511 Hz  
AQ 0.3495753 sec  
RG 196.92  
DW 5.333 usec  
DE 6.50 usec  
TE 298.2 K  
D1 2.00000000 sec  
D11 0.03000000 sec  
TD0 1

==== CHANNEL f1 =====  
SFO1 376.4607162 MHz  
NUC1 19F  
P1 14.70 usec  
SI 32768  
SF 376.4983660 MHz  
WDW EM  
SSB 0  
LB 1.00 Hz  
GB 0  
PC 1.40



S-166



NAME HNMR-gwg-9-19-1  
EXPNO 1  
PROCNO 1  
Date\_ 20201001  
Time\_ 19.42  
INSTRUM spect  
PROBHD 5 mm PABBO BB/  
PULPROG zg30  
TD 65536  
SOLVENT CD2Cl2  
NS 3  
DS 0  
SWH 8012.820 Hz  
FIDRES 0.122266 Hz  
AQ 4.0894966 sec  
RG 27.78  
DW 62.400 usec  
DE 6.50 usec  
TE 297.9 K  
D1 1.00000000 sec  
TD0 1

==== CHANNEL f1 =====  
SFO1 400.1324710 MHz  
NUC1 1H  
P1 14.50 usec  
SI 65536  
SF 400.1300000 MHz  
WDW EM  
SSB 0  
LB 0.30 Hz  
GB 0  
PC 1.00

7.59  
7.59  
7.57  
7.47  
7.47  
7.46  
7.45  
7.45  
7.44  
7.43  
7.42  
7.42  
7.41  
7.41  
7.40  
7.39  
7.39  
7.38  
7.38  
7.37  
7.29  
7.28  
7.27  
7.26  
6.46  
6.31  
5.30  
5.27  
5.26  
5.24  
5.20  
5.16  
4.92  
4.90

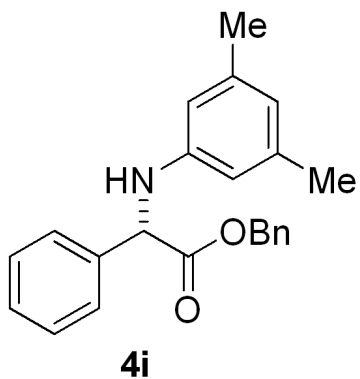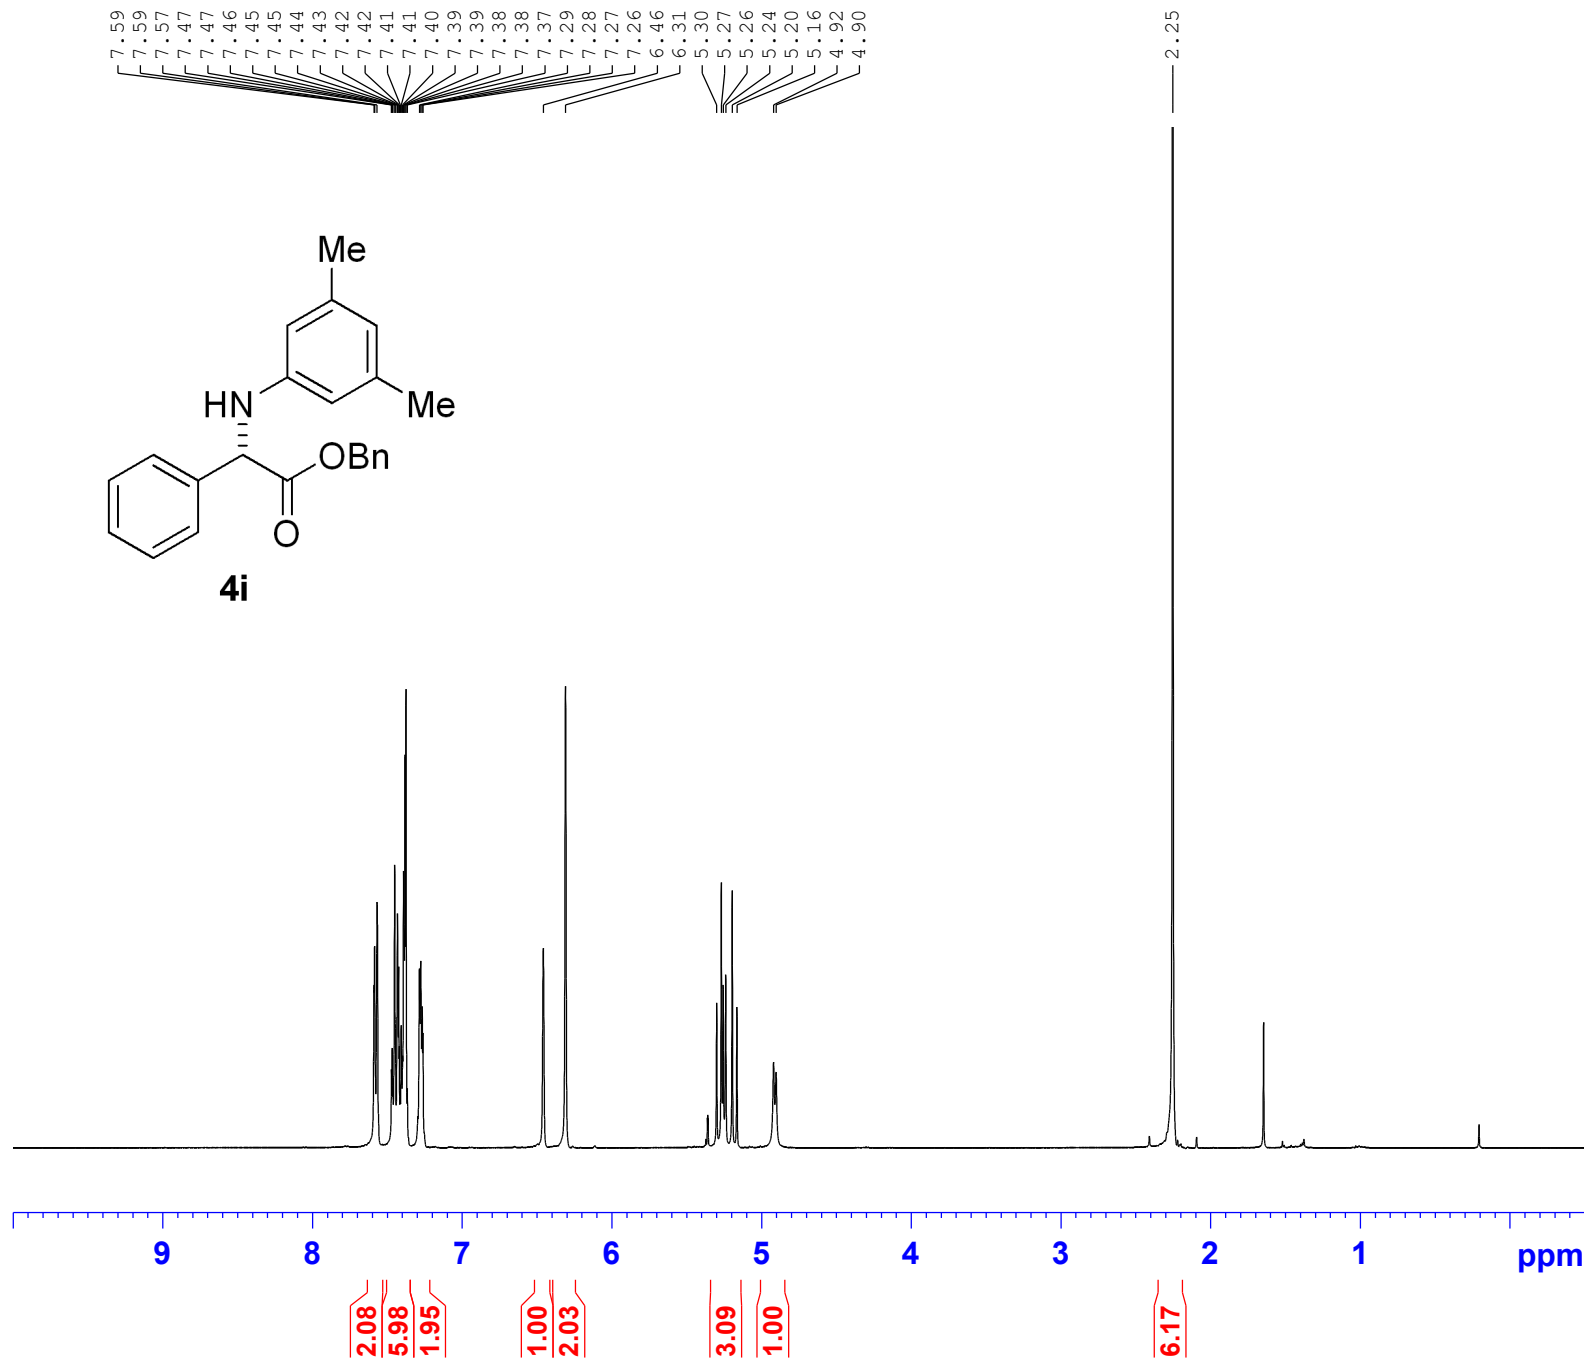



NAME CNMR-gwg-9-19-1  
EXPNO 1  
PROCNO 1  
Date\_ 20201001  
Time\_ 19.44  
INSTRUM spect  
PROBHD 5 mm PABBO BB/  
PULPROG zgpg30  
TD 65536  
SOLVENT CD2Cl2  
NS 12  
DS 0  
SWH 24038.461 Hz  
FIDRES 0.366798 Hz  
AQ 1.3631988 sec  
RG 196.92  
DW 20.800 usec  
DE 6.50 usec  
TE 298.3 K  
D1 2.00000000 sec  
D11 0.03000000 sec  
TD0 1

==== CHANNEL f1 =====  
SF01 100.6228298 MHz  
NUC1 13C  
P1 9.70 usec  
SI 32768  
SF 100.6127690 MHz  
WDW EM  
SSB 0  
LB 1.00 Hz  
GB 0  
PC 1.40

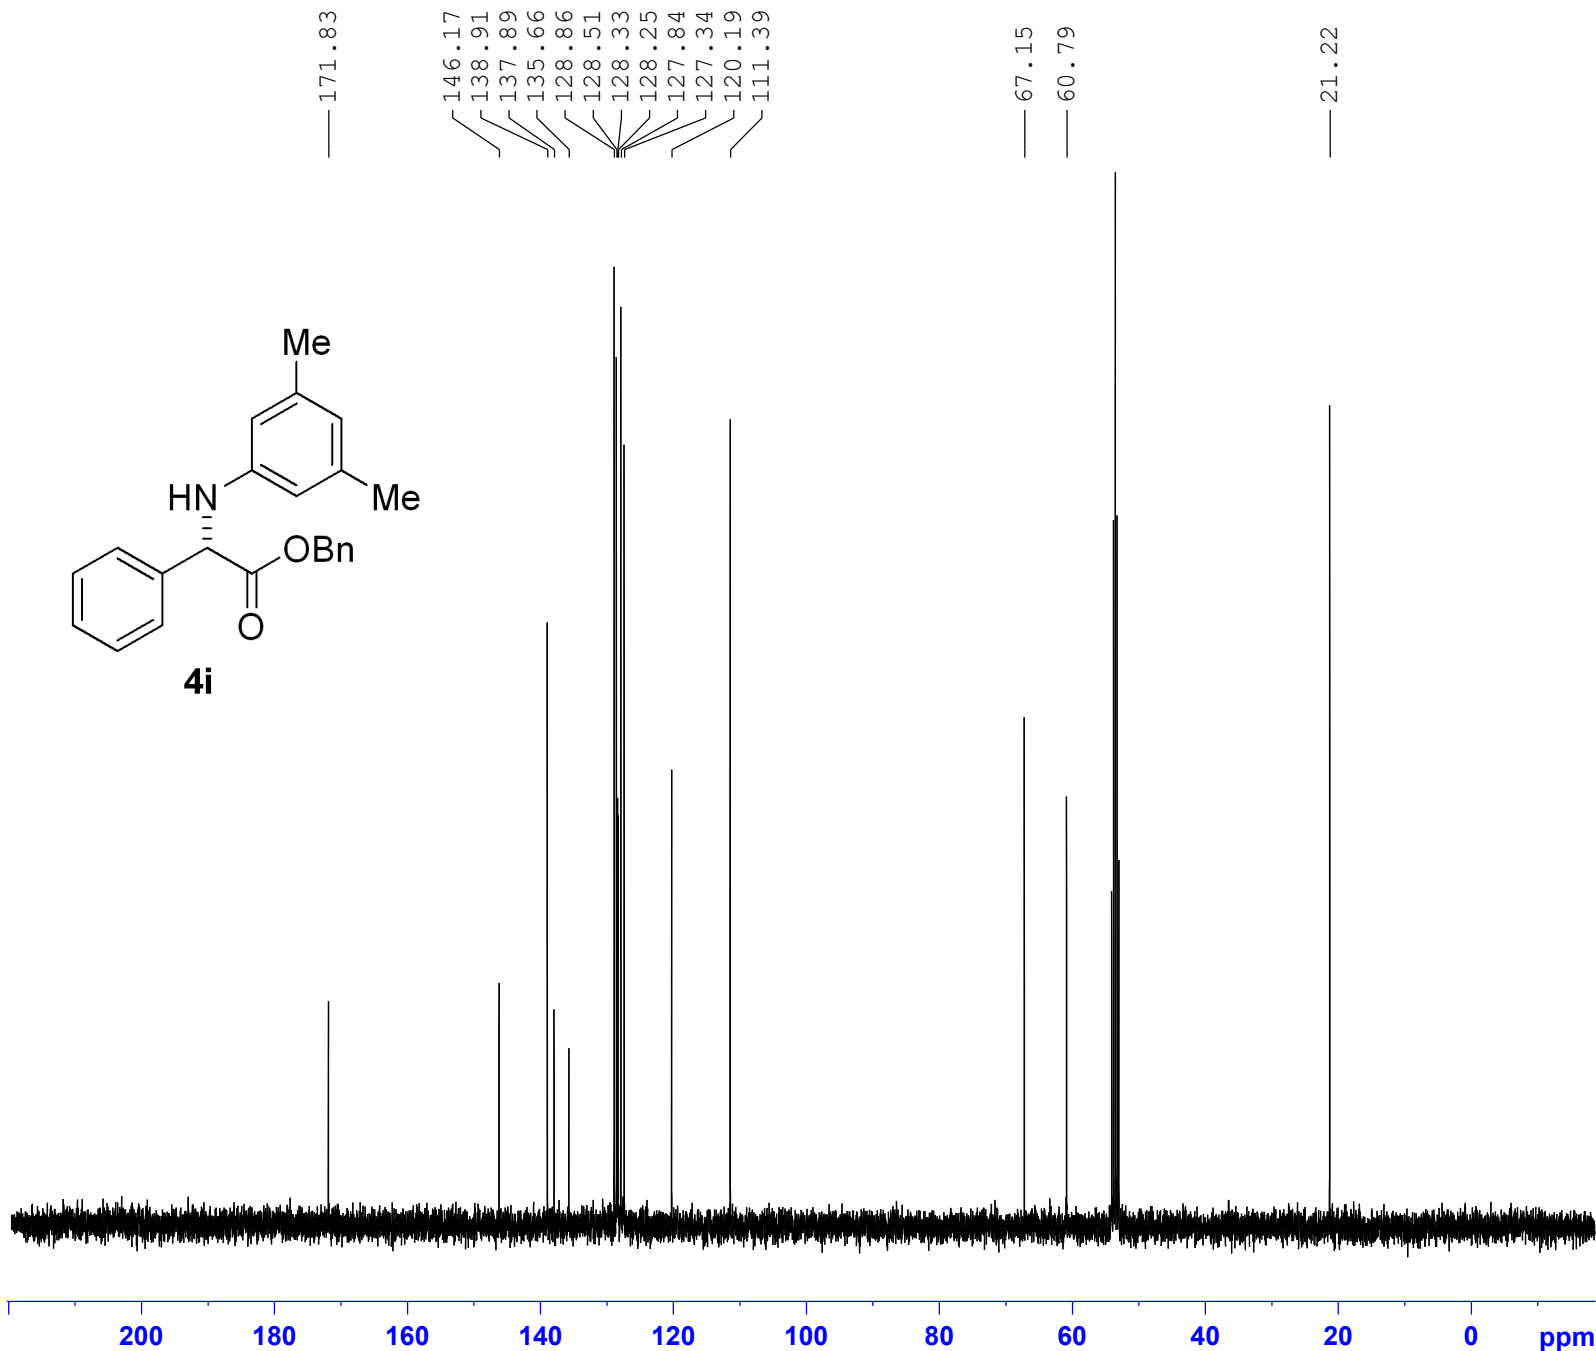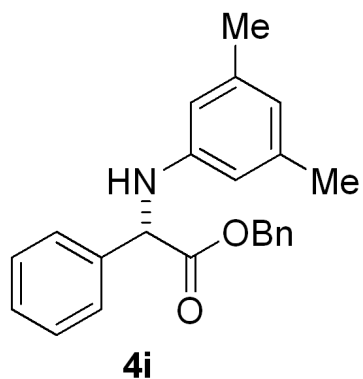



7.46  
7.45  
7.44  
7.38  
7.37  
7.36  
7.36  
7.35  
7.34  
7.33  
7.27  
7.26  
7.25  
7.24  
7.24  
7.23  
7.23  
7.22  
7.22  
7.21  
7.21  
7.20  
7.19  
7.19  
7.18  
7.17  
7.17  
7.17  
7.16  
7.16  
7.15  
7.15  
7.11  
7.09  
7.08  
7.07  
7.06  
7.05  
7.05  
7.03  
6.25  
6.25  
6.23  
6.23  
5.69  
5.68  
5.21  
5.20  
5.12  
5.09  
5.05  
5.02

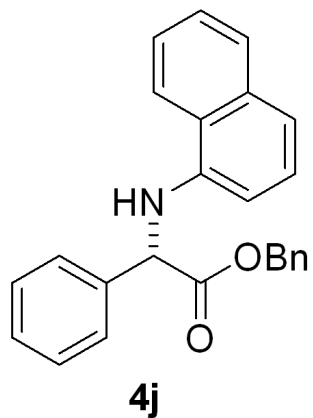

```

NAME      HNMR-gwg-9-27-1-true
EXPNO     1
PROCNO    1
Date_     20201007
Time      17.53
INSTRUM   spect
PROBHD    5 mm PABBO BB/
PULPROG   zg30
TD        65536
SOLVENT   CD2Cl2
NS        2
DS        0
SWH       8012.820 Hz
FIDRES    0.122266 Hz
AQ        4.0894966 sec
RG        31.55
DW        62.400 usec
DE        6.50 usec
TE        295.9 K
D1        1.00000000 sec
TD0       1
  
```

```

===== CHANNEL f1 =====
SFO1     400.1324710 MHz
NUC1     1H
P1       14.50 usec
SI       65536
SF       400.1300869 MHz
WDW      EM
SSB      0
LB       0.30 Hz
GB       0
PC       1.00
  
```

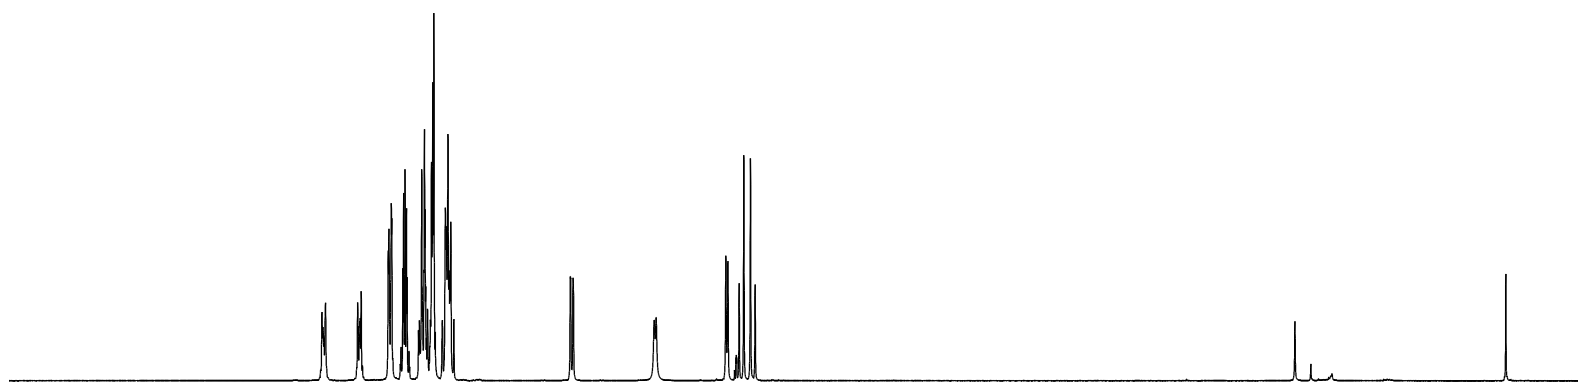

1.02  
1.02  
2.01  
2.02  
5.88  
3.91  
1.00  
0.99  
1.00  
2.04



NAME CNMR-gwg-9-27-1-true  
EXPNO 1  
PROCNO 1  
Date\_ 20201007  
Time 17.55  
INSTRUM spect  
PROBHD 5 mm PABBO BB/  
PULPROG zgpg30  
TD 65536  
SOLVENT CD2C12  
NS 10  
DS 0  
SWH 24038.461 Hz  
FIDRES 0.366798 Hz  
AQ 1.3631988 sec  
RG 196.92  
DW 20.800 usec  
DE 6.50 usec  
TE 296.2 K  
D1 2.00000000 sec  
D11 0.03000000 sec  
TD0 1

===== CHANNEL f1 =====  
SFO1 100.6228298 MHz  
NUC1 13C  
P1 9.70 usec  
SI 32768  
SF 100.6127690 MHz  
WDW EM  
SSB 0  
LB 1.00 Hz  
GB 0  
PC 1.40

171.69  
141.03  
137.50  
135.54  
134.38  
128.93  
128.61  
128.53  
128.48  
128.30  
127.80  
127.39  
126.31  
125.96  
125.03  
123.46  
120.11  
118.02  
105.59

67.44  
60.87

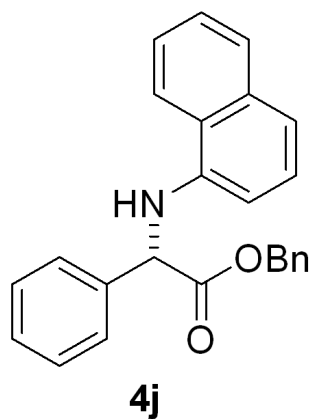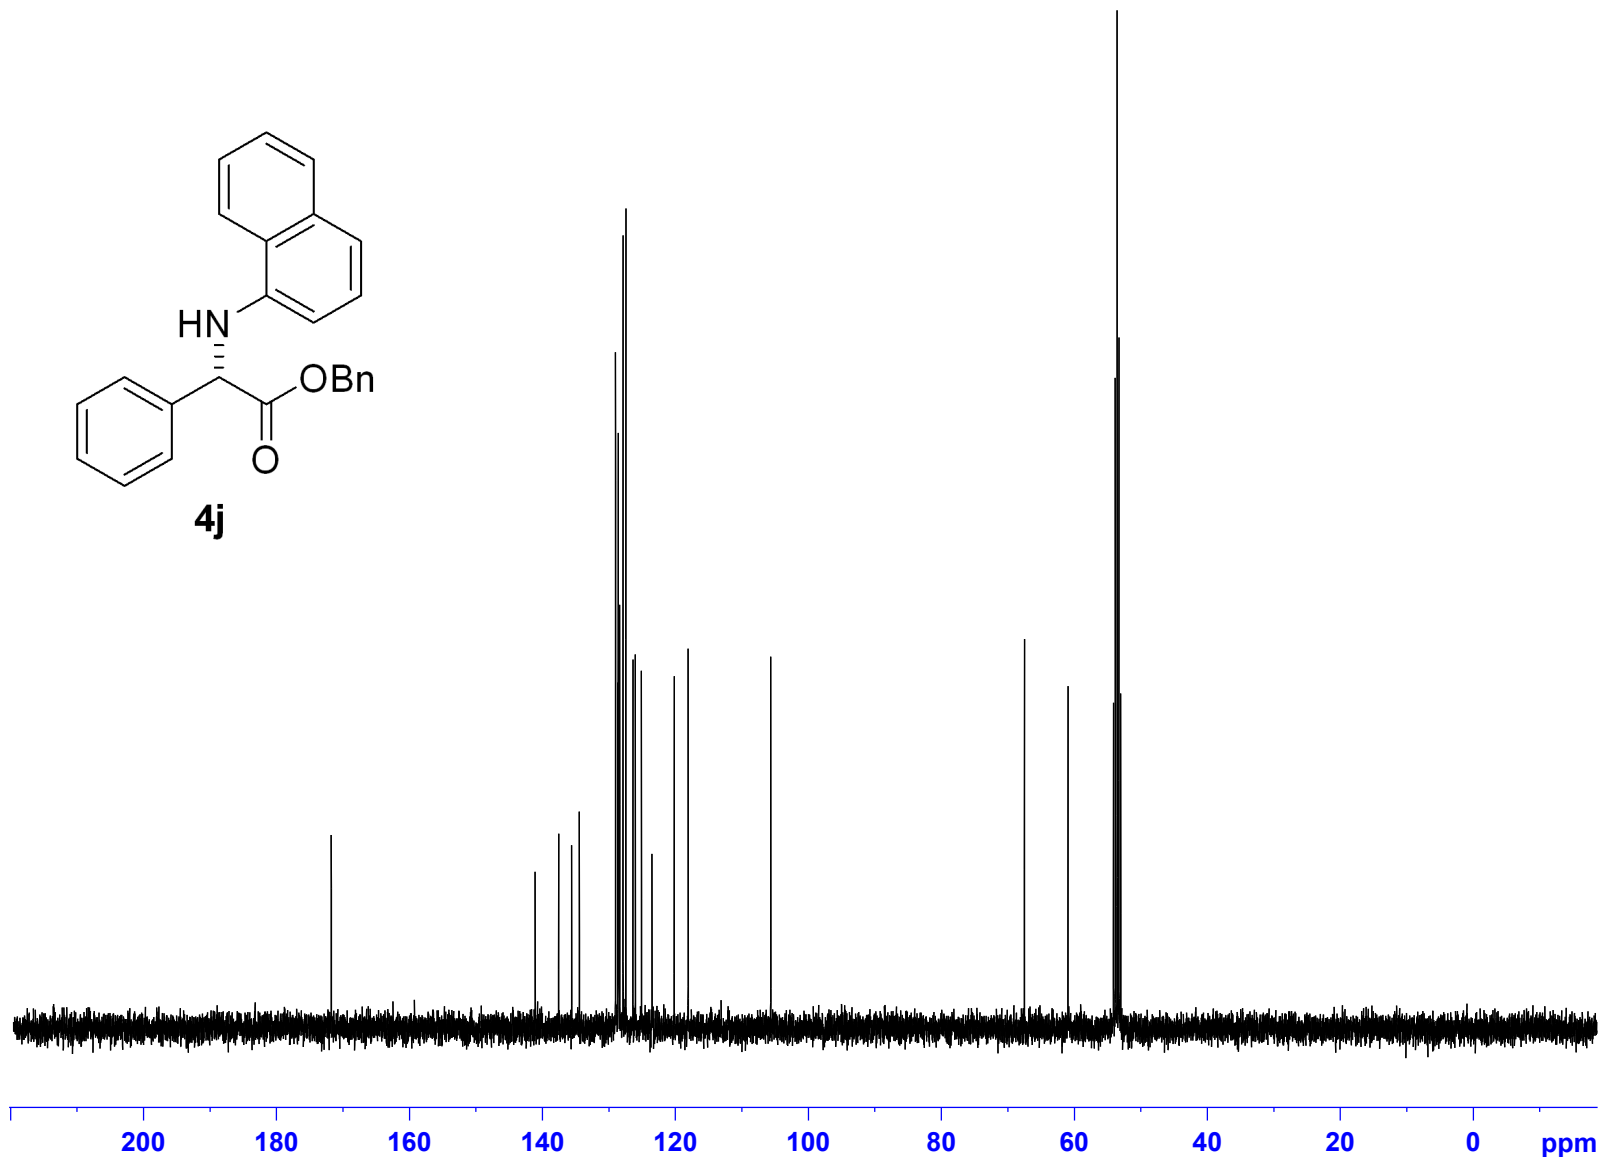

7.42  
7.41  
7.41  
7.40  
7.39  
7.38  
7.38  
7.37  
7.37  
7.36  
7.36  
7.35  
7.35  
7.34  
7.34  
7.33  
7.33  
7.32  
7.32  
7.32  
7.31  
7.30  
7.30  
7.28  
7.27  
7.26  
7.25  
7.24  
7.18  
7.17  
7.17  
7.16  
7.15  
7.15  
7.02  
7.00  
6.98  
6.44  
6.43  
5.73  
5.71  
5.45  
5.44  
5.30  
5.27  
5.23  
5.20

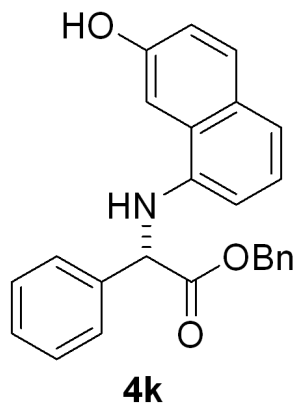

```

NAME      HNMR-gwg-9-45-1
EXPNO     1
PROCNO    1
Date_     20201013
Time      22.49
INSTRUM   spect
PROBHD    5 mm PABBO BB/
PULPROG   zg30
TD        65536
SOLVENT   Acetone
NS        4
DS        0
SWH       8012.820 Hz
FIDRES    0.122266 Hz
AQ        4.0894966 sec
RG        39.46
DW        62.400 usec
DE        6.50 usec
TE        297.6 K
D1        1.00000000 sec
TD0       1
  
```

```

===== CHANNEL f1 =====
SFO1     400.1324710 MHz
NUC1     1H
P1       14.50 usec
SI       65536
SF       400.1300000 MHz
WDW      EM
SSB      0
LB       0.30 Hz
GB       0
PC       1.00
  
```

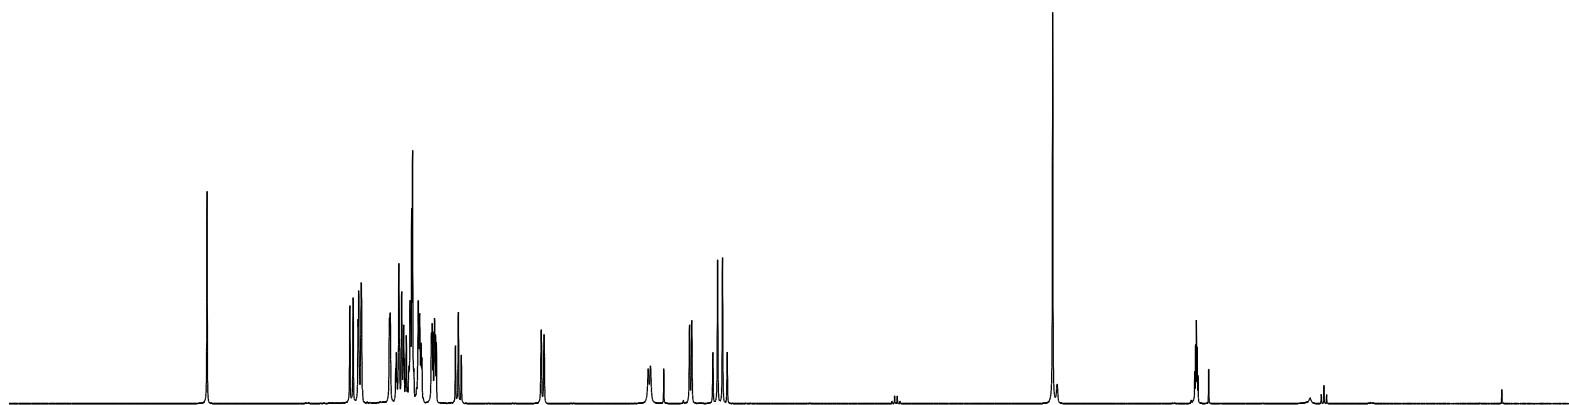

0.88  
1.03  
1.98  
1.02  
2.94  
2.97  
1.93  
1.99  
1.02  
1.00  
0.85  
1.01  
2.03



NAME CNMR-gwg-9-45-1  
EXPNO 1  
PROCNO 1  
Date\_ 20201013  
Time\_ 22.54  
INSTRUM spect  
PROBHD 5 mm PABBO BB/  
PULPROG zgpg30  
TD 65536  
SOLVENT Acetone  
NS 21  
DS 0  
SWH 24038.461 Hz  
FIDRES 0.366798 Hz  
AQ 1.3631988 sec  
RG 196.92  
DW 20.800 usec  
DE 6.50 usec  
TE 298.0 K  
D1 2.00000000 sec  
D11 0.03000000 sec  
TD0 1

==== CHANNEL f1 =====  
SF01 100.6228298 MHz  
NUC1 13C  
P1 9.70 usec  
SI 32768  
SF 100.6127690 MHz  
WDW EM  
SSB 0  
LB 1.00 Hz  
GB 0  
PC 1.40

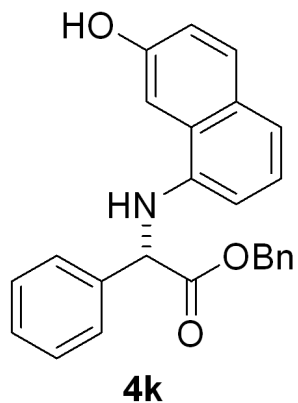

171.77  
154.99  
140.05  
138.00  
135.97  
130.13  
129.10  
128.70  
128.38  
128.20  
128.03  
127.65  
127.50  
125.20  
123.13  
118.01  
117.83  
106.16  
102.68

66.77  
60.72

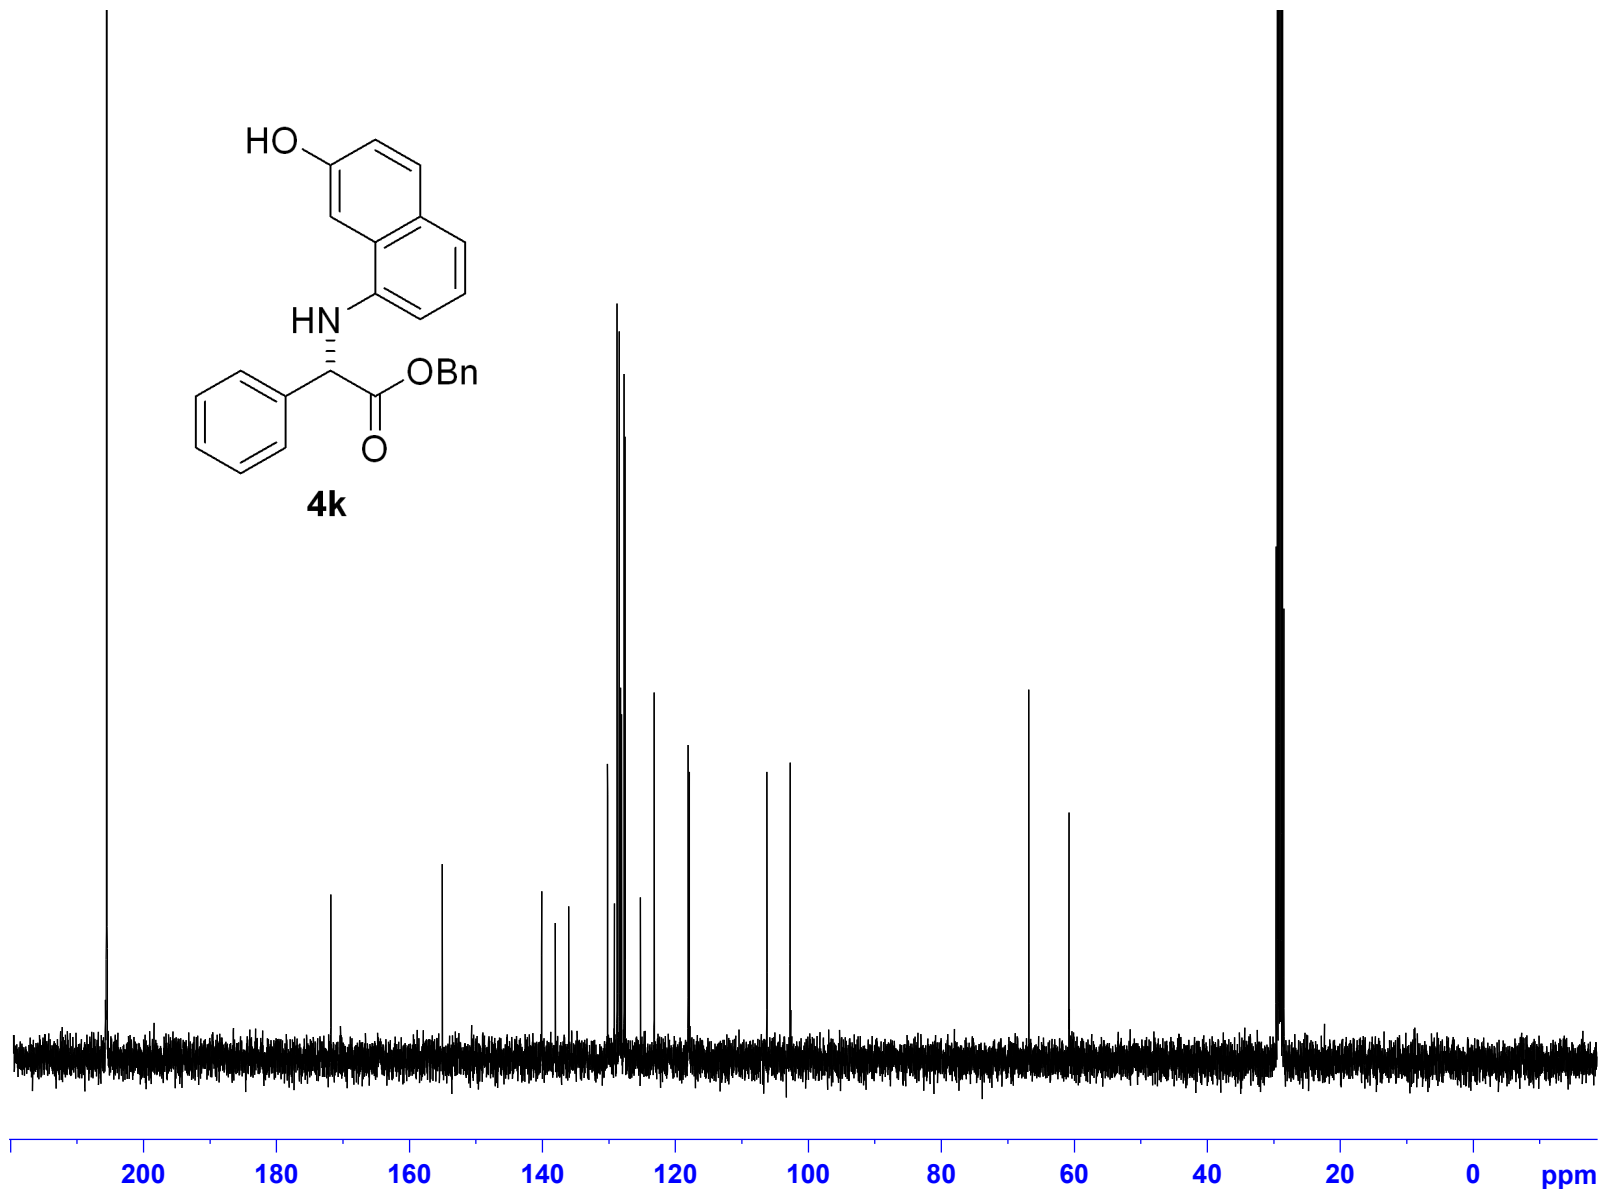

7.43  
7.43  
7.42  
7.42  
7.41  
7.41  
7.40  
7.39  
7.38  
7.38  
7.37  
7.37  
7.37  
7.36  
7.36  
7.29  
7.29  
7.27  
7.27  
7.27  
7.26  
7.26  
7.26  
7.24  
7.24  
7.22  
7.22  
7.14  
7.14  
7.12  
7.12  
6.82  
6.82  
6.81  
6.74  
6.74  
6.72  
6.72  
6.39  
6.38  
6.38  
6.38  
6.38  
6.37  
6.37  
5.31  
5.30  
5.26  
5.21  
5.18  
4.83



NAME HNMR-gwg-9-46-1  
EXPNO 1  
PROCNO 1  
Date\_ 20201013  
Time\_ 22.42  
INSTRUM spect  
PROBHD 5 mm PABBO BB/  
PULPROG zg30  
TD 65536  
SOLVENT CD2Cl2  
NS 4  
DS 0  
SWH 8012.820 Hz  
FIDRES 0.122266 Hz  
AQ 4.0894966 sec  
RG 31.55  
DW 62.400 usec  
DE 6.50 usec  
TE 297.6 K  
D1 1.00000000 sec  
TD0 1

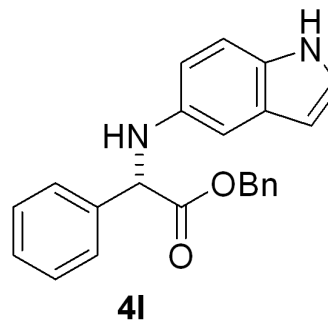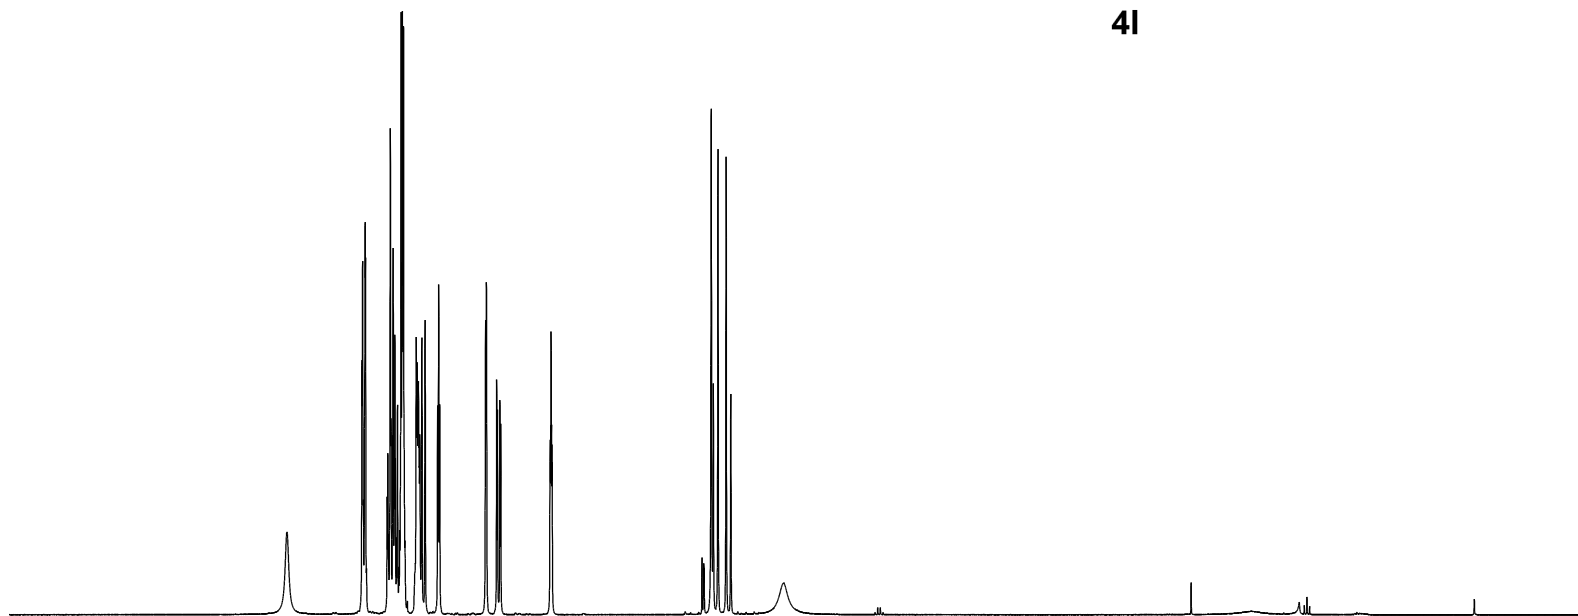

==== CHANNEL f1 =====  
SFO1 400.1324710 MHz  
NUC1 1H  
P1 14.50 usec  
SI 65536  
SF 400.1300000 MHz  
WDW EM  
SSB 0  
LB 0.30 Hz  
GB 0  
PC 1.00

9 8 7 6 5 4 3 2 1 ppm

1.00  
2.08  
6.03  
3.00  
1.02  
1.03  
1.04  
1.00  
3.13  
0.84



NAME CNMR-gwg-9-46-1  
EXPNO 1  
PROCNO 1  
Date\_ 20201013  
Time\_ 22.45  
INSTRUM spect  
PROBHD 5 mm PABBO BB/  
PULPROG zgpg30  
TD 65536  
SOLVENT CD2Cl2  
NS 9  
DS 0  
SWH 24038.461 Hz  
FIDRES 0.366798 Hz  
AQ 1.3631988 sec  
RG 196.92  
DW 20.800 usec  
DE 6.50 usec  
TE 297.9 K  
D1 2.00000000 sec  
D11 0.03000000 sec  
TD0 1

==== CHANNEL f1 =====  
SF01 100.6228298 MHz  
NUC1 13C  
P1 9.70 usec  
SI 32768  
SF 100.6127690 MHz  
WDW EM  
SSB 0  
LB 1.00 Hz  
GB 0  
PC 1.40

— 172.25  
140.11  
138.16  
135.72  
130.43  
128.83  
128.68  
128.50  
128.27  
128.21  
127.82  
127.46  
124.73  
112.36  
111.83  
103.07  
101.51  
— 67.09  
— 62.13

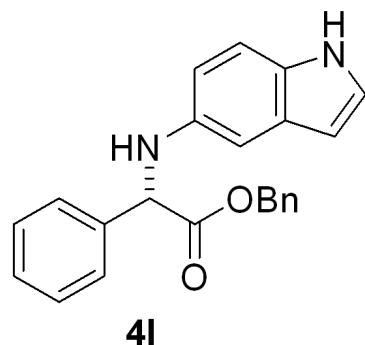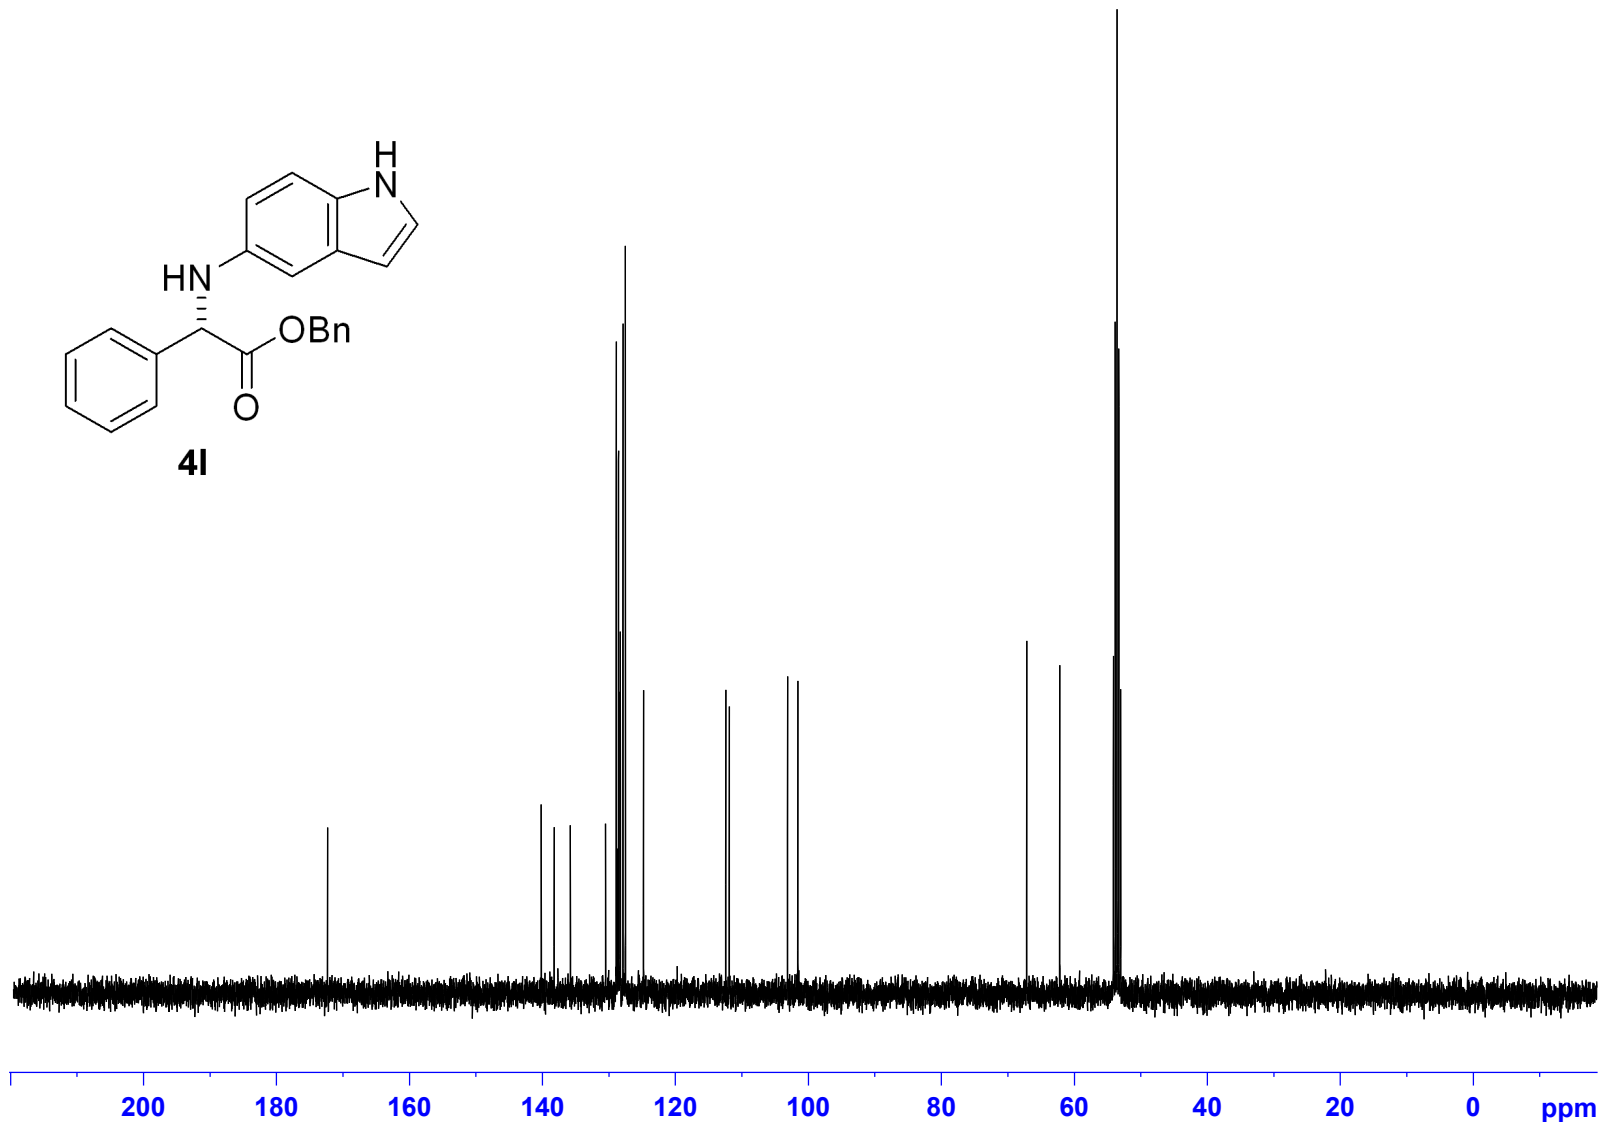

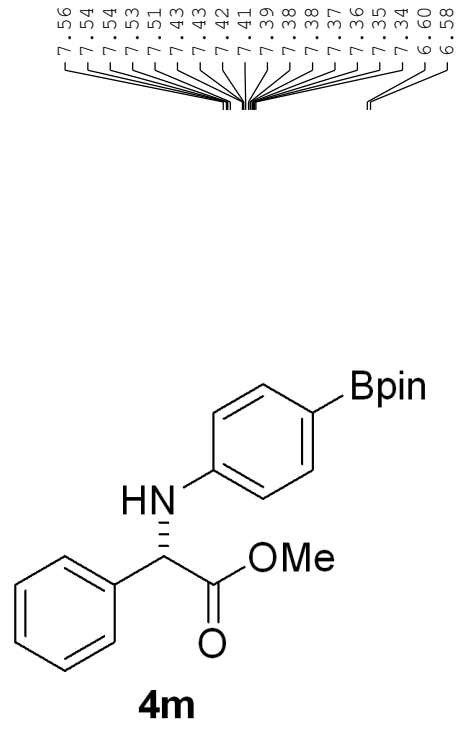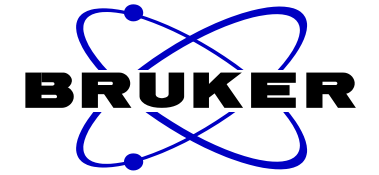

NAME HNMR-gwg-9-57-1  
 EXPNO 1  
 PROCNO 1  
 Date\_ 20201018  
 Time\_ 4.41  
 INSTRUM spect  
 PROBHD 5 mm PABBO BB/  
 PULPROG zg30  
 TD 65536  
 SOLVENT CD2Cl2  
 NS 3  
 DS 0  
 SWH 8012.820 Hz  
 FIDRES 0.122266 Hz  
 AQ 4.0894966 sec  
 RG 39.46  
 DW 62.400 usec  
 DE 6.50 usec  
 TE 297.9 K  
 D1 1.00000000 sec  
 TD0 1

==== CHANNEL f1 =====  
 SFO1 400.1324710 MHz  
 NUC1 1H  
 P1 14.50 usec  
 SI 65536  
 SF 400.1300000 MHz  
 WDW EM  
 SSB 0  
 LB 0.30 Hz  
 GB 0  
 PC 1.00

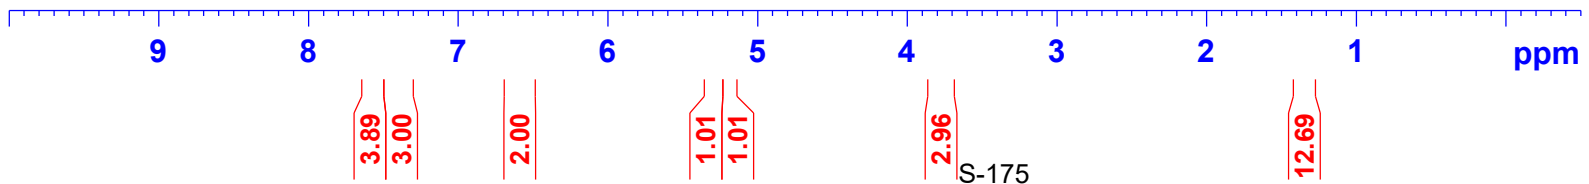

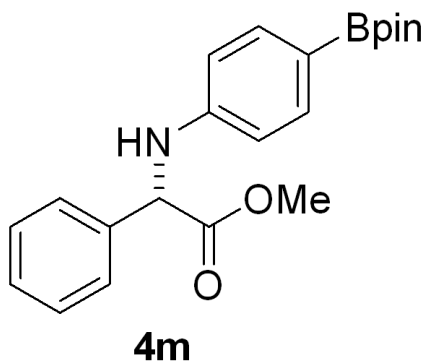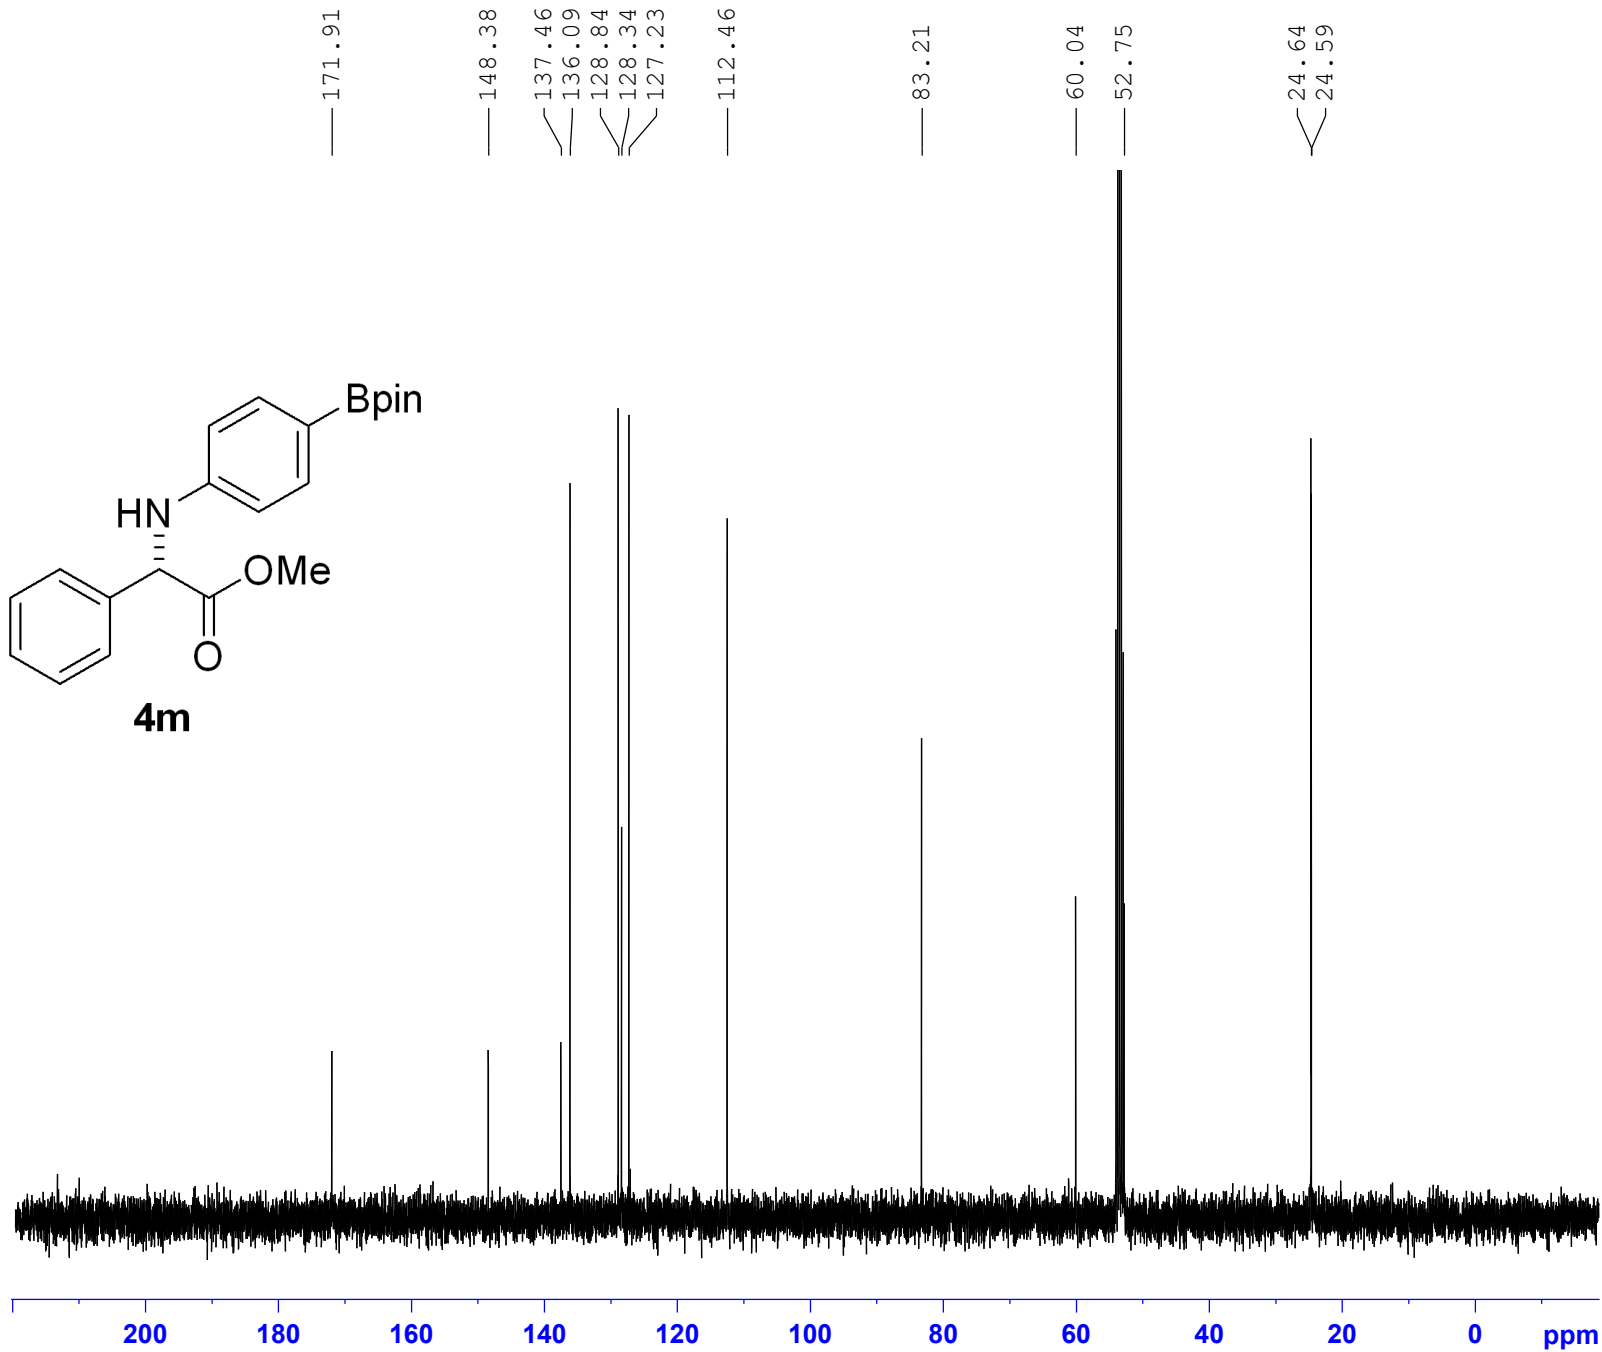

```

NAME      CNMR-gwg-9-57-1
EXPNO     1
PROCNO    1
Date_     20201018
Time_     4.44
INSTRUM   spect
PROBHD    5 mm PABBO BB/
PULPROG   zgpg30
TD         65536
SOLVENT   CD2C12
NS         23
DS         0
SWH        24038.461 Hz
FIDRES     0.366798 Hz
AQ         1.3631988 sec
RG         196.92
DW         20.800 usec
DE         6.50 usec
TE         298.6 K
D1         2.00000000 sec
D11        0.03000000 sec
TD0        1
  
```

```

===== CHANNEL f1 =====
SFO1      100.6228298 MHz
NUC1       13C
P1         9.70 usec
SI         32768
SF         100.6127690 MHz
WDW        EM
SSB        0
LB         1.00 Hz
GB         0
PC         1.40
  
```





7.42  
7.42  
7.41  
7.40  
7.39  
7.39  
7.38  
7.37  
7.37  
7.34  
7.33  
7.32  
7.31  
7.30  
7.29  
7.15  
7.14  
7.14  
7.09  
7.09  
7.07  
7.05  
6.77  
6.76  
6.75  
6.75  
6.73  
6.73  
6.51  
6.49  
5.43  
5.30  
5.27  
5.25  
5.22  
3.73  
3.71  
3.69  
3.66  
3.20  
3.19  
3.18  
3.18  
3.17  
3.17  
3.16  
3.14  
3.04  
3.03  
3.02  
3.00  
2.99  
2.98  
2.96  
2.94  
2.92  
2.91  
2.90  
2.88

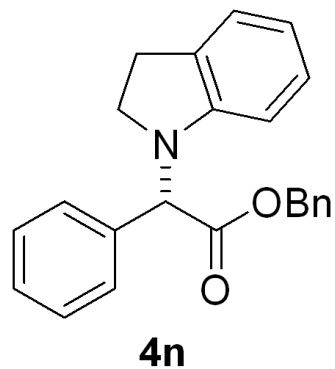

NAME HNMR-gwg-9-32-1  
EXPNO 1  
PROCNO 1  
Date\_ 20201008  
Time\_ 18.53  
INSTRUM spect  
PROBHD 5 mm PABBO BB/  
PULPROG zg30  
TD 65536  
SOLVENT CD2Cl2  
NS 3  
DS 2  
SWH 8012.820 Hz  
FIDRES 0.122266 Hz  
AQ 4.0894966 sec  
RG 4.51  
DW 62.400 usec  
DE 6.50 usec  
TE 296.1 K  
D1 1.00000000 sec  
TD0 1

==== CHANNEL f1 =====  
SFO1 400.1324710 MHz  
NUC1 1H  
P1 14.50 usec  
SI 65536  
SF 400.1300000 MHz  
WDW EM  
SSB 0  
LB 0.30 Hz  
GB 0  
PC 1.00

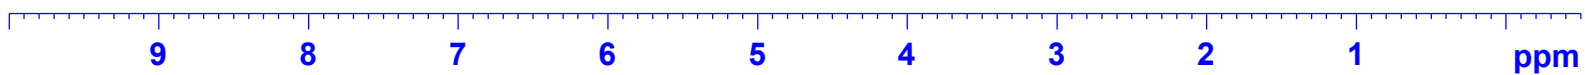

9.75  
2.02  
1.00  
1.01  
1.01  
2.04  
1.02  
1.03  
2.06

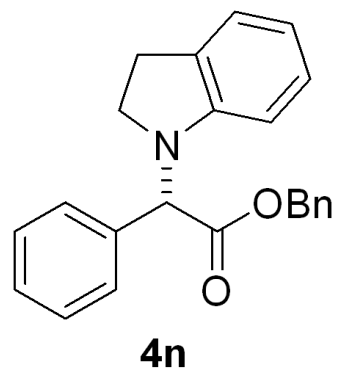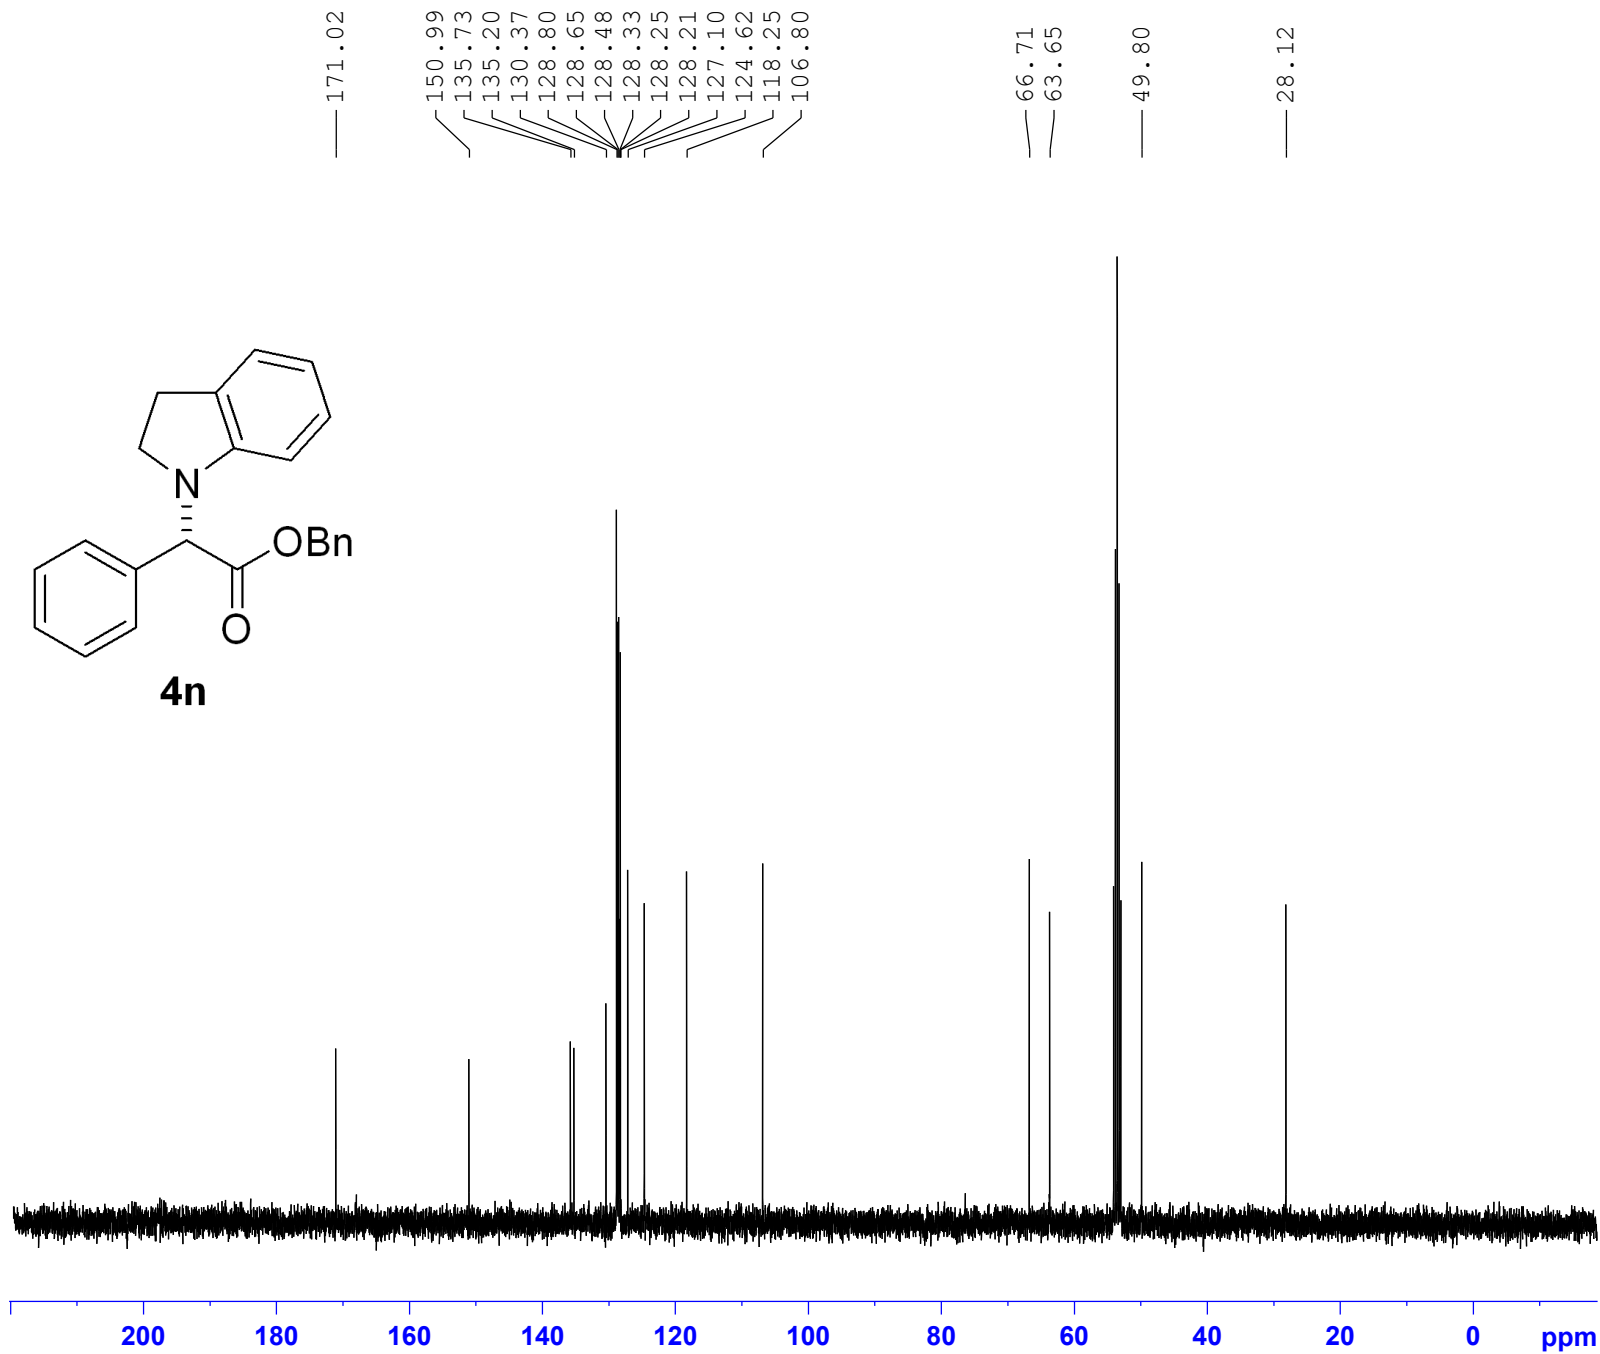

```

NAME      CNMR-gwg-9-32-1
EXPNO     1
PROCNO    1
Date_     20201008
Time_     18.55
INSTRUM   spect
PROBHD    5 mm PABBO BB/
PULPROG   zgpg30
TD         65536
SOLVENT   CD2Cl2
NS         10
DS         0
SWH        24038.461 Hz
FIDRES     0.366798 Hz
AQ         1.3631988 sec
RG         196.92
DW         20.800 usec
DE         6.50 usec
TE         296.4 K
D1         2.00000000 sec
D11        0.03000000 sec
TD0        1
  
```

```

===== CHANNEL f1 =====
SF01      100.6228298 MHz
NUC1       13C
P1         9.70 usec
SI         32768
SF         100.6127690 MHz
WDW        EM
SSB        0
LB         1.00 Hz
GB         0
PC         1.40
  
```

```

=====
Acq. Operator   :                               Seq. Line :    2
Acq. Instrument : Instrument 1                   Location  : Vial 51
Injection Date  : 9/1/2020 3:17:17 PM           Inj       :    1
                                                Inj Volume: 5.000 µl
Different Inj Volume from Sequence ! Actual Inj Volume : 3.000 µl
Acq. Method    : C:\CHEM32\1\DATA\QDY 2020-09-01 14-54-04\IC-05-30.M
Last changed   : 9/1/2020 3:16:27 PM
                (modified after loading)
Analysis Method: C:\CHEM32\1\METHODS\IC-10-10.M
Last changed   : 9/1/2020 3:40:05 PM
                (modified after loading)
Additional Info : Peak(s) manually integrated
  
```

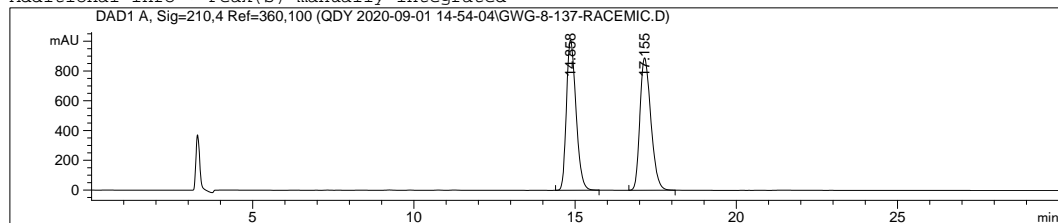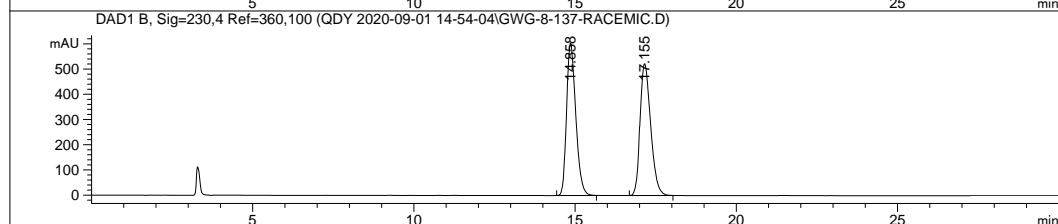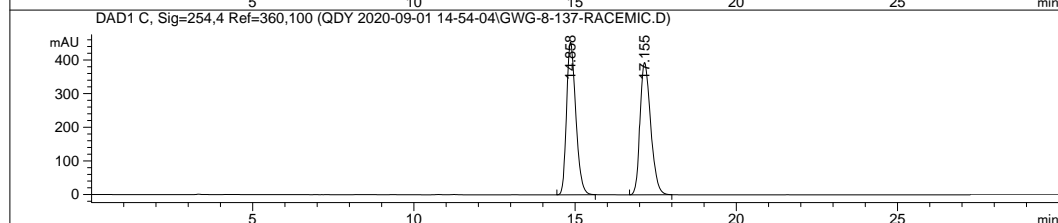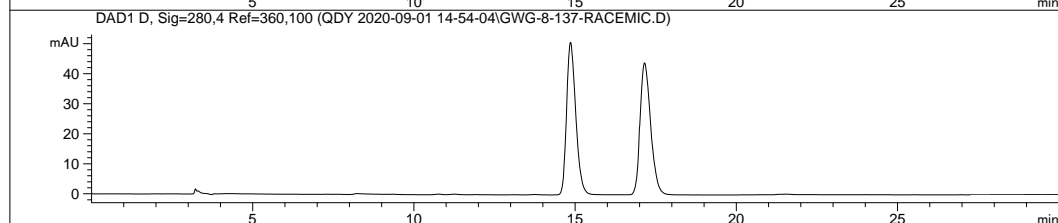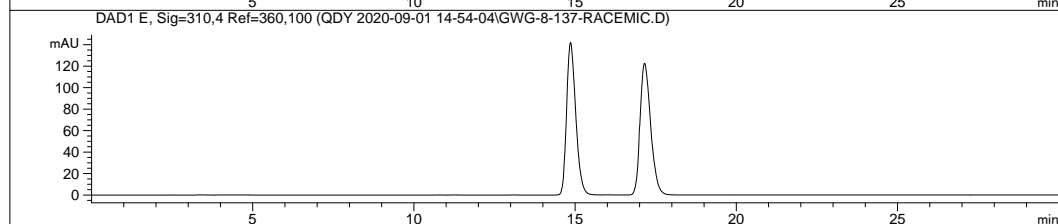

```

=====
                          Area Percent Report
=====
Sorted By      :      Signal
Multiplier    :      1.0000
Dilution      :      1.0000
Use Multiplier & Dilution Factor with ISTDs
  
```

Signal 1: DAD1 A, Sig=210,4 Ref=360,100

| Peak # | RetTime [min] | Type | Width [min] | Area [mAU*s] | Height [mAU] | Area %  |
|--------|---------------|------|-------------|--------------|--------------|---------|
| 1      | 14.858        | BB   | 0.3227      | 2.08261e4    | 1009.49969   | 49.7909 |
| 2      | 17.155        | BB   | 0.3694      | 2.10010e4    | 889.57947    | 50.2091 |

Totals : 4.18271e4 1899.07916

Signal 2: DAD1 B, Sig=230,4 Ref=360,100

| Peak # | RetTime [min] | Type | Width [min] | Area [mAU*s] | Height [mAU] | Area %  |
|--------|---------------|------|-------------|--------------|--------------|---------|
| 1      | 14.858        | BB   | 0.3055      | 1.19880e4    | 604.24005    | 50.0737 |
| 2      | 17.155        | BB   | 0.3528      | 1.19527e4    | 522.65009    | 49.9263 |

Totals : 2.39407e4 1126.89014

Signal 3: DAD1 C, Sig=254,4 Ref=360,100

| Peak # | RetTime [min] | Type | Width [min] | Area [mAU*s] | Height [mAU] | Area %  |
|--------|---------------|------|-------------|--------------|--------------|---------|
| 1      | 14.858        | BB   | 0.3085      | 9035.15527   | 453.41522    | 50.0292 |
| 2      | 17.155        | BB   | 0.3558      | 9024.61426   | 393.09067    | 49.9708 |

Totals : 1.80598e4 846.50589

Signal 4: DAD1 D, Sig=280,4 Ref=360,100

Signal 5: DAD1 E, Sig=310,4 Ref=360,100

\*\*\* End of Report \*\*\*

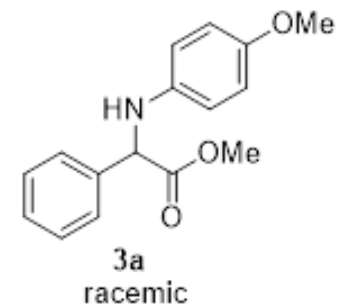

```

=====
Acq. Operator   :                               Seq. Line :    3
Acq. Instrument : Instrument 1                  Location  : Vial 52
Injection Date  : 9/1/2020 3:48:22 PM          Inj       :    1
                                                Inj Volume: 5.000 µl
Different Inj Volume from Sequence ! Actual Inj Volume : 3.000 µl
Acq. Method    : C:\CHEM32\1\DATA\QDY 2020-09-01 14-54-04\IC-05-30.M
Last changed   : 9/1/2020 3:16:27 PM
                (modified after loading)
Analysis Method: C:\CHEM32\1\METHODS\IC-10-10.M
Last changed   : 9/1/2020 3:40:05 PM
                (modified after loading)
Additional Info : Peak(s) manually integrated
    
```

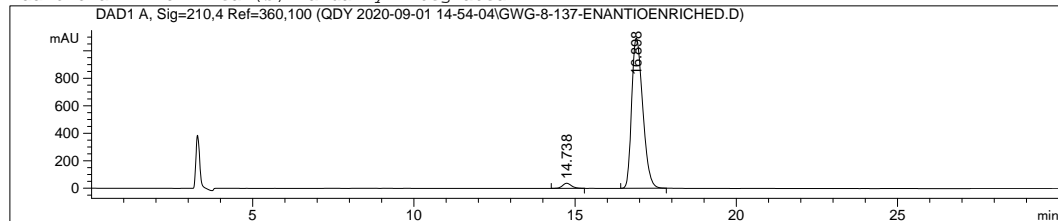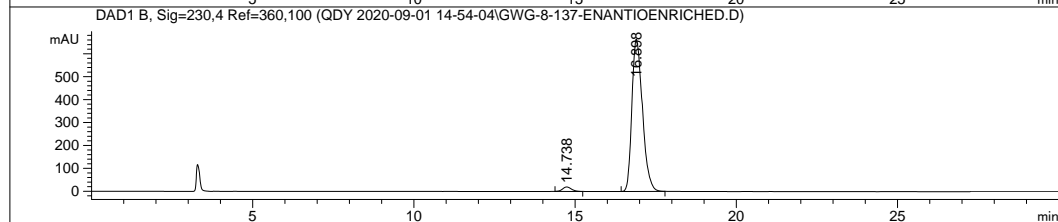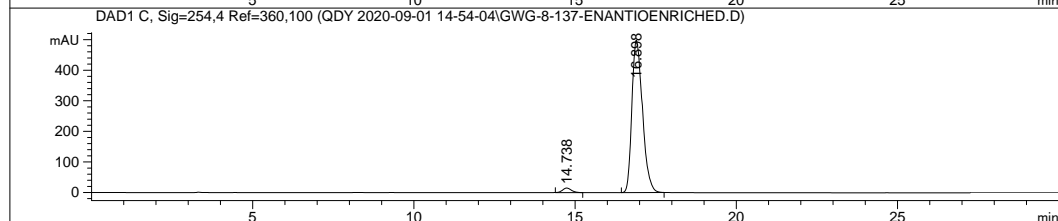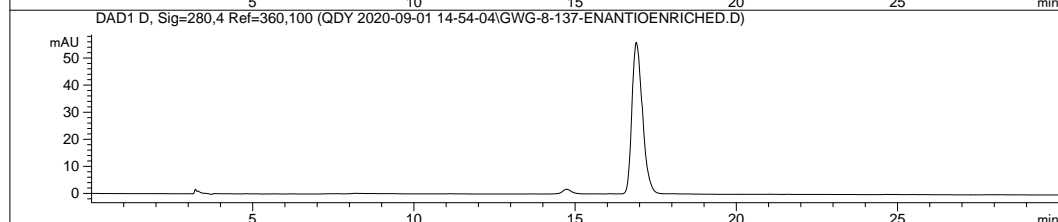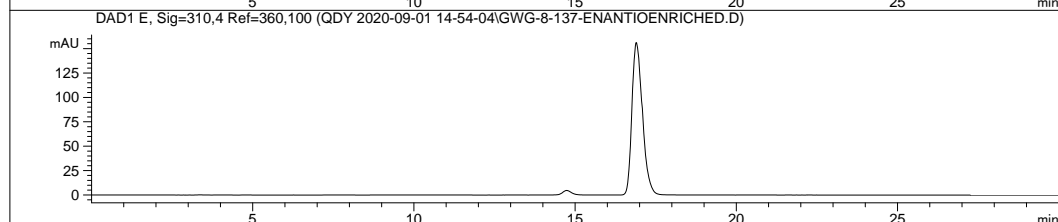

```

=====
                          Area Percent Report
=====
Sorted By      :      Signal
Multiplier     :      1.0000
Dilution       :      1.0000
Use Multiplier & Dilution Factor with ISTDs
    
```

Signal 1: DAD1 A, Sig=210,4 Ref=360,100

| Peak # | RetTime [min] | Type | Width [min] | Area [mAU*s] | Height [mAU] | Area %  |
|--------|---------------|------|-------------|--------------|--------------|---------|
| 1      | 14.738        | BB   | 0.2954      | 724.81329    | 37.18166     | 2.7117  |
| 2      | 16.898        | BB   | 0.3714      | 2.60047e4    | 1093.56177   | 97.2883 |

Totals : 2.67295e4 1130.74343

Signal 2: DAD1 B, Sig=230,4 Ref=360,100

| Peak # | RetTime [min] | Type | Width [min] | Area [mAU*s] | Height [mAU] | Area %  |
|--------|---------------|------|-------------|--------------|--------------|---------|
| 1      | 14.738        | BB   | 0.2935      | 378.28503    | 19.75071     | 2.4413  |
| 2      | 16.898        | BB   | 0.3514      | 1.51167e4    | 664.42096    | 97.5587 |

Totals : 1.54950e4 684.17167

Signal 3: DAD1 C, Sig=254,4 Ref=360,100

| Peak # | RetTime [min] | Type | Width [min] | Area [mAU*s] | Height [mAU] | Area %  |
|--------|---------------|------|-------------|--------------|--------------|---------|
| 1      | 14.738        | BB   | 0.2943      | 286.00613    | 15.00942     | 2.4490  |
| 2      | 16.898        | BB   | 0.3548      | 1.13924e4    | 498.24713    | 97.5510 |

Totals : 1.16784e4 513.25655

Signal 4: DAD1 D, Sig=280,4 Ref=360,100

Signal 5: DAD1 E, Sig=310,4 Ref=360,100

\*\*\* End of Report \*\*\*

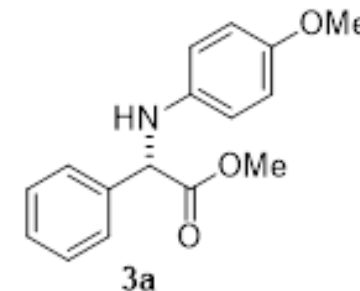

```

=====
Acq. Operator   :                               Seq. Line :    5
Acq. Instrument : Instrument 1                   Location  : Vial 53
Injection Date  : 9/1/2020 4:40:50 PM           Inj       :    1
                                                Inj Volume: 5.000 µl
Different Inj Volume from Sequence ! Actual Inj Volume : 3.000 µl
Acq. Method    : C:\CHEM32\1\DATA\QDY 2020-09-01 14-54-04\IC-05-30.M
Last changed   : 8/23/2012 1:59:23 PM
Analysis Method : C:\CHEM32\1\METHODS\IC-10-10.M
Last changed   : 9/1/2020 3:40:05 PM
                (modified after loading)
    
```

Additional Info : Peak(s) manually integrated

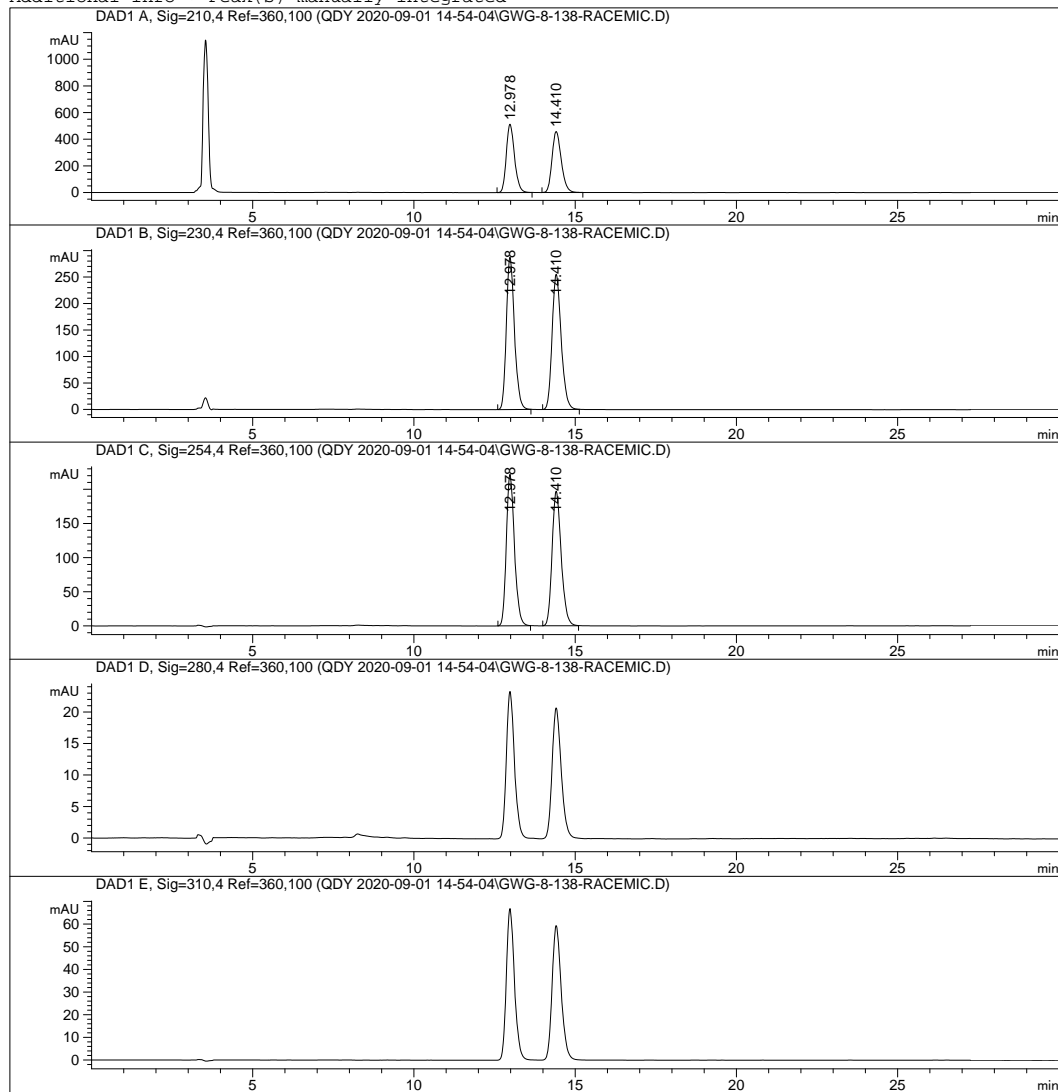

Area Percent Report

```

=====
Sorted By      : Signal
Multiplier    : 1.0000
Dilution       : 1.0000
Use Multiplier & Dilution Factor with ISTDs
    
```

Signal 1: DAD1 A, Sig=210,4 Ref=360,100

| Peak # | RetTime [min] | Type | Width [min] | Area [mAU*s] | Height [mAU] | Area %  |
|--------|---------------|------|-------------|--------------|--------------|---------|
| 1      | 12.978        | BB   | 0.2752      | 9105.52539   | 512.78381    | 49.9484 |
| 2      | 14.410        | BB   | 0.3086      | 9124.32227   | 457.57535    | 50.0516 |

Totals : 1.82298e4 970.35916

Signal 2: DAD1 B, Sig=230,4 Ref=360,100

| Peak # | RetTime [min] | Type | Width [min] | Area [mAU*s] | Height [mAU] | Area %  |
|--------|---------------|------|-------------|--------------|--------------|---------|
| 1      | 12.978        | BB   | 0.2698      | 5026.75049   | 287.69846    | 50.0714 |
| 2      | 14.410        | BB   | 0.3032      | 5012.41064   | 255.17485    | 49.9286 |

Totals : 1.00392e4 542.87331

Signal 3: DAD1 C, Sig=254,4 Ref=360,100

| Peak # | RetTime [min] | Type | Width [min] | Area [mAU*s] | Height [mAU] | Area %  |
|--------|---------------|------|-------------|--------------|--------------|---------|
| 1      | 12.978        | BB   | 0.2702      | 3883.92163   | 221.84990    | 50.0640 |
| 2      | 14.410        | BB   | 0.3035      | 3873.99731   | 196.92349    | 49.9360 |

Totals : 7757.91895 418.77339

Signal 4: DAD1 D, Sig=280,4 Ref=360,100

Signal 5: DAD1 E, Sig=310,4 Ref=360,100

\*\*\* End of Report \*\*\*

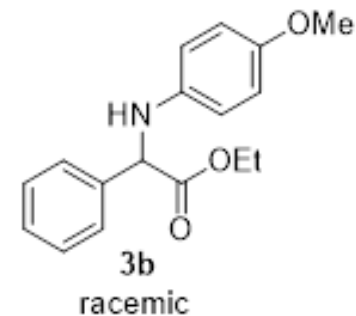

```

=====
Acq. Operator   :                               Seq. Line :    6
Acq. Instrument : Instrument 1                  Location  : Vial 54
Injection Date  : 9/1/2020 5:11:53 PM          Inj       :    1
                                                Inj Volume: 5.000 µl
Different Inj Volume from Sequence ! Actual Inj Volume : 3.000 µl
Acq. Method    : C:\CHEM32\1\DATA\QDY 2020-09-01 14-54-04\IC-05-30.M
Last changed   : 8/23/2012 1:59:23 PM
Analysis Method : C:\CHEM32\1\METHODS\IC-10-10.M
Last changed   : 9/1/2020 3:40:05 PM
                (modified after loading)
    
```

Additional Info : Peak(s) manually integrated

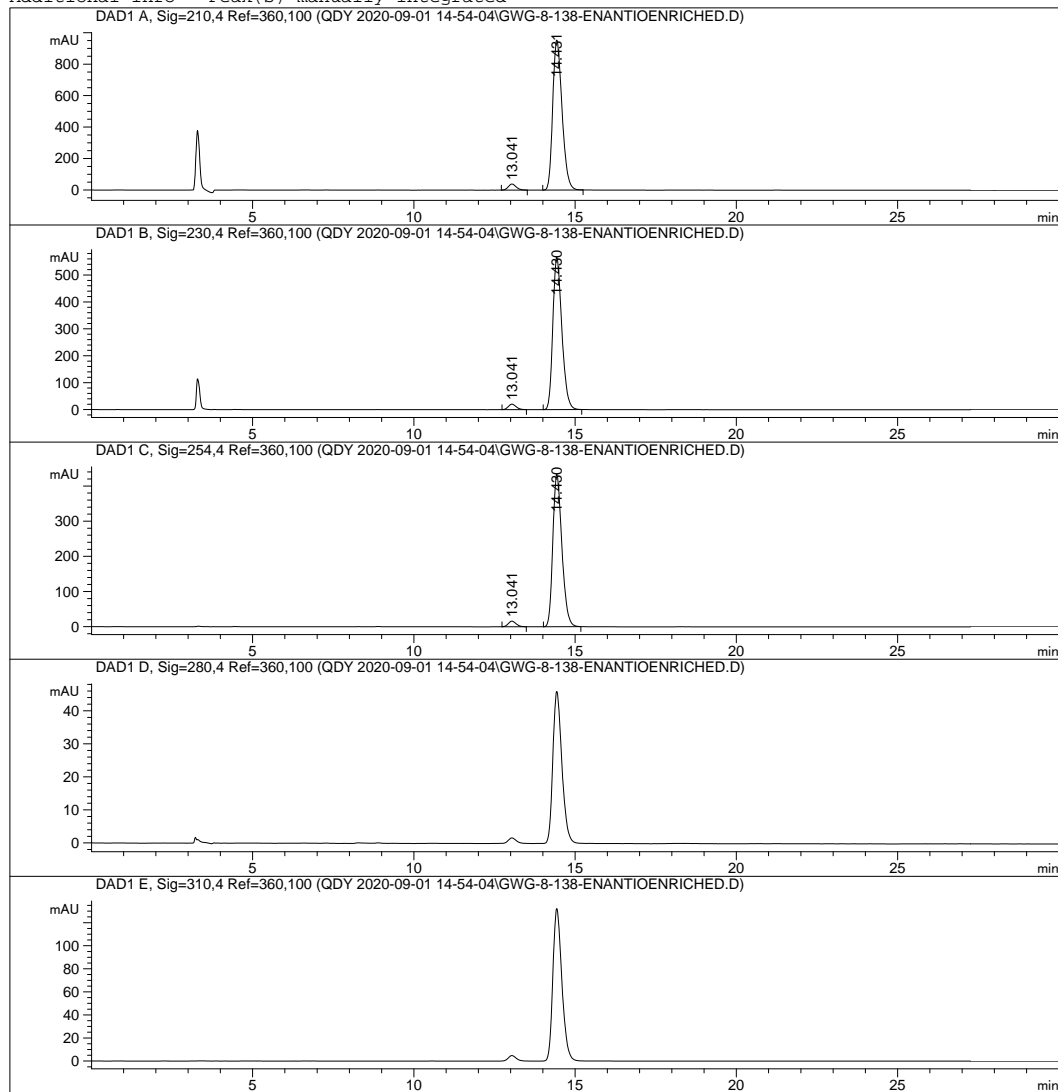

Area Percent Report

```

Sorted By      :      Signal
Multiplier    :      1.0000
Dilution      :      1.0000
Use Multiplier & Dilution Factor with ISTDs
    
```

Signal 1: DAD1 A, Sig=210,4 Ref=360,100

| Peak # | RetTime [min] | Type | Width [min] | Area [mAU*s] | Height [mAU] | Area %  |
|--------|---------------|------|-------------|--------------|--------------|---------|
| 1      | 13.041        | BB   | 0.2641      | 663.79102    | 38.69476     | 3.3377  |
| 2      | 14.431        | BB   | 0.3153      | 1.92239e4    | 953.35455    | 96.6623 |

Totals : 1.98877e4 992.04931

Signal 2: DAD1 B, Sig=230,4 Ref=360,100

| Peak # | RetTime [min] | Type | Width [min] | Area [mAU*s] | Height [mAU] | Area %  |
|--------|---------------|------|-------------|--------------|--------------|---------|
| 1      | 13.041        | BB   | 0.2626      | 352.62909    | 20.71931     | 3.0986  |
| 2      | 14.430        | BB   | 0.3011      | 1.10278e4    | 566.47827    | 96.9014 |

Totals : 1.13804e4 587.19758

Signal 3: DAD1 C, Sig=254,4 Ref=360,100

| Peak # | RetTime [min] | Type | Width [min] | Area [mAU*s] | Height [mAU] | Area %  |
|--------|---------------|------|-------------|--------------|--------------|---------|
| 1      | 13.041        | BB   | 0.2623      | 273.48157    | 16.08755     | 3.1255  |
| 2      | 14.430        | BB   | 0.3021      | 8476.39063   | 433.53259    | 96.8745 |

Totals : 8749.87219 449.62014

Signal 4: DAD1 D, Sig=280,4 Ref=360,100

Signal 5: DAD1 E, Sig=310,4 Ref=360,100

\*\*\* End of Report \*\*\*

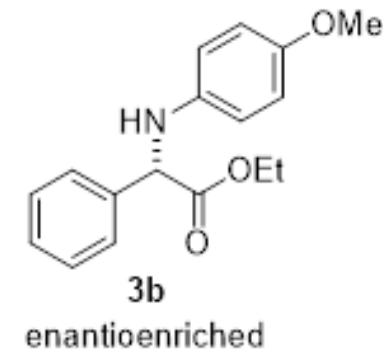

```

=====
Acq. Operator   :                               Seq. Line : 18
Acq. Instrument : Instrument 1                   Location  : Vial 55
Injection Date  : 9/1/2020 9:12:52 PM          Inj       : 1
                                                Inj Volume: 5.000 µl
Acq. Method    : C:\CHEM32\1\DATA\QDY 2020-09-01 14-54-04\AD-20-15.M
Last changed   : 9/1/2020 9:11:59 PM
                (modified after loading)
Analysis Method: C:\CHEM32\1\METHODS\IC-10-10.M
Last changed   : 9/1/2020 3:40:05 PM
                (modified after loading)
    
```

Additional Info : Peak(s) manually integrated

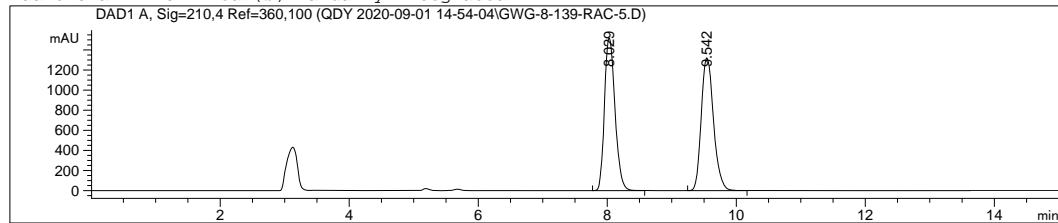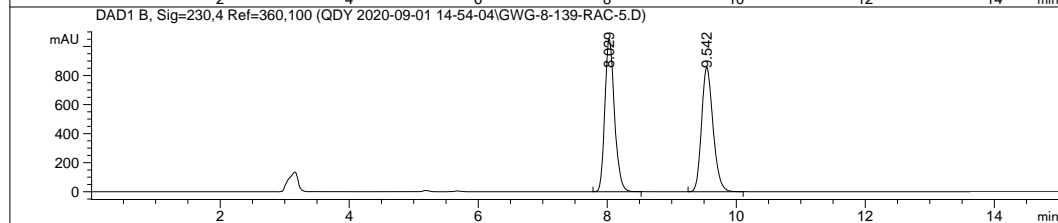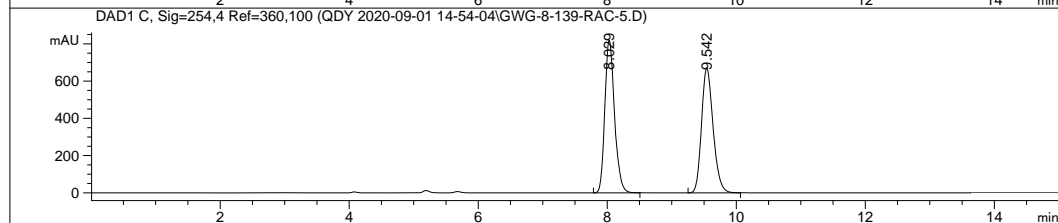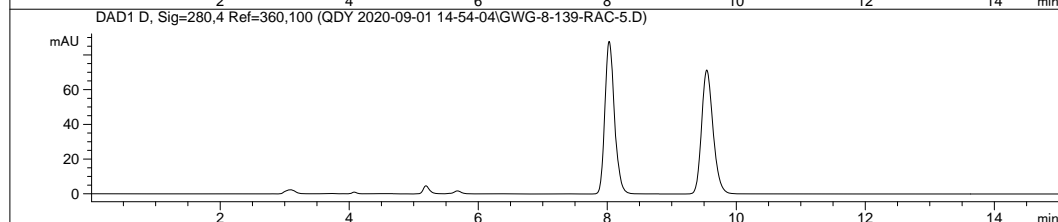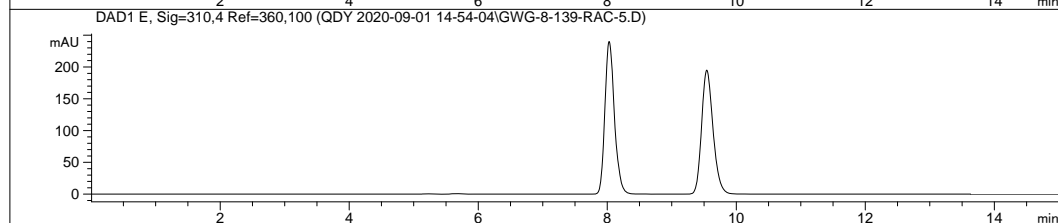

Area Percent Report

```

Sorted By      : Signal
Multiplier    : 1.0000
Dilution      : 1.0000
Use Multiplier & Dilution Factor with ISTDs
    
```

Signal 1: DAD1 A, Sig=210,4 Ref=360,100

| Peak # | RetTime [min] | Type | Width [min] | Area [mAU*s] | Height [mAU] | Area %  |
|--------|---------------|------|-------------|--------------|--------------|---------|
| 1      | 8.029         | BB   | 0.1778      | 1.71643e4    | 1519.39392   | 49.5794 |
| 2      | 9.542         | BB   | 0.2062      | 1.74556e4    | 1320.54407   | 50.4206 |

Totals : 3.46199e4 2839.93799

Signal 2: DAD1 B, Sig=230,4 Ref=360,100

| Peak # | RetTime [min] | Type | Width [min] | Area [mAU*s] | Height [mAU] | Area %  |
|--------|---------------|------|-------------|--------------|--------------|---------|
| 1      | 8.029         | BB   | 0.1583      | 1.08413e4    | 1051.26514   | 50.5394 |
| 2      | 9.542         | BB   | 0.1905      | 1.06099e4    | 856.66278    | 49.4606 |

Totals : 2.14512e4 1907.92792

Signal 3: DAD1 C, Sig=254,4 Ref=360,100

| Peak # | RetTime [min] | Type | Width [min] | Area [mAU*s] | Height [mAU] | Area %  |
|--------|---------------|------|-------------|--------------|--------------|---------|
| 1      | 8.029         | BB   | 0.1612      | 8516.29004   | 820.01440    | 50.4630 |
| 2      | 9.542         | BB   | 0.1934      | 8360.01953   | 670.96411    | 49.5370 |

Totals : 1.68763e4 1490.97852

Signal 4: DAD1 D, Sig=280,4 Ref=360,100

Signal 5: DAD1 E, Sig=310,4 Ref=360,100

\*\*\* End of Report \*\*\*

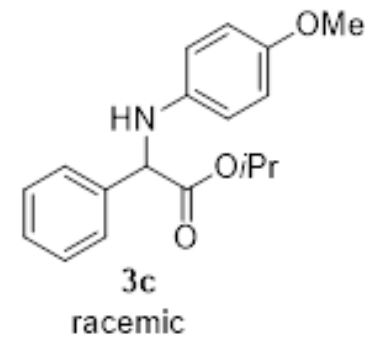

```

=====
Acq. Operator   :                               Seq. Line : 19
Acq. Instrument : Instrument 1                 Location  : Vial 56
Injection Date  : 9/1/2020 9:28:54 PM        Inj       : 1
                                                Inj Volume: 5.000 µl
Different Inj Volume from Sequence ! Actual Inj Volume : 3.000 µl
Acq. Method    : C:\CHEM32\1\DATA\QDY 2020-09-01 14-54-04\AD-20-15.M
Last changed   : 9/1/2020 9:11:59 PM
                (modified after loading)
Analysis Method: C:\CHEM32\1\METHODS\IC-10-10.M
Last changed   : 9/1/2020 3:40:05 PM
                (modified after loading)
Additional Info : Peak(s) manually integrated
  
```

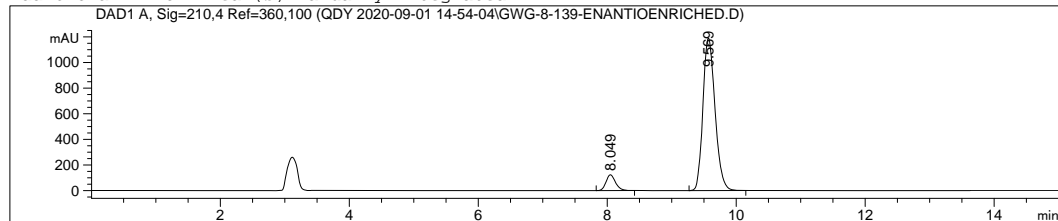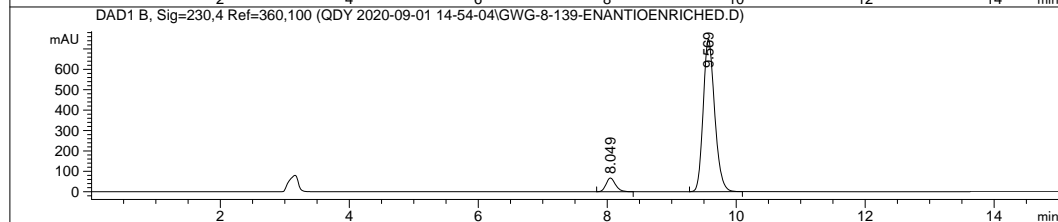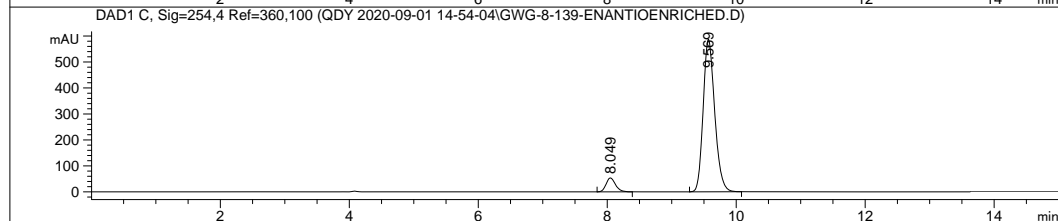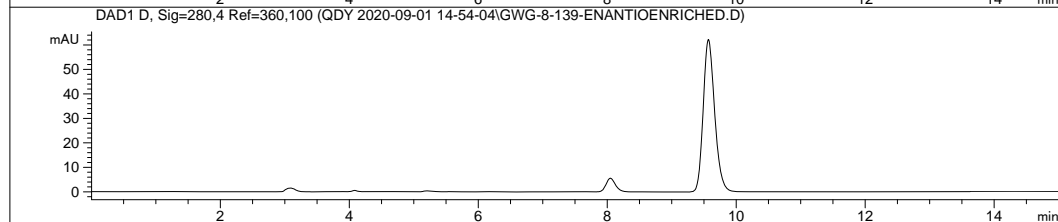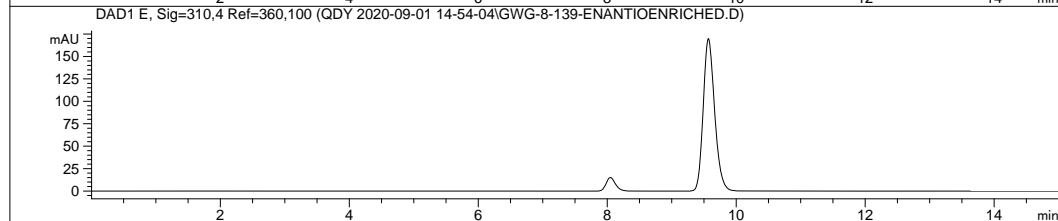

```

=====
                          Area Percent Report
=====
Sorted By      :      Signal
Multiplier    :      1.0000
Dilution      :      1.0000
Use Multiplier & Dilution Factor with ISTDs
  
```

Signal 1: DAD1 A, Sig=210,4 Ref=360,100

| Peak # | RetTime [min] | Type | Width [min] | Area [mAU*s] | Height [mAU] | Area %  |
|--------|---------------|------|-------------|--------------|--------------|---------|
| 1      | 8.049         | BB   | 0.1568      | 1256.21899   | 123.34299    | 7.4980  |
| 2      | 9.569         | BB   | 0.2018      | 1.54979e4    | 1191.04883   | 92.5020 |

Totals : 1.67542e4 1314.39182

Signal 2: DAD1 B, Sig=230,4 Ref=360,100

| Peak # | RetTime [min] | Type | Width [min] | Area [mAU*s] | Height [mAU] | Area %  |
|--------|---------------|------|-------------|--------------|--------------|---------|
| 1      | 8.049         | BB   | 0.1564      | 683.32629    | 67.30994     | 6.8900  |
| 2      | 9.569         | BB   | 0.1900      | 9234.27734   | 747.95123    | 93.1100 |

Totals : 9917.60364 815.26118

Signal 3: DAD1 C, Sig=254,4 Ref=360,100

| Peak # | RetTime [min] | Type | Width [min] | Area [mAU*s] | Height [mAU] | Area %  |
|--------|---------------|------|-------------|--------------|--------------|---------|
| 1      | 8.049         | BB   | 0.1565      | 545.69214    | 53.74457     | 6.9633  |
| 2      | 9.569         | BB   | 0.1908      | 7291.00195   | 587.32318    | 93.0367 |

Totals : 7836.69409 641.06775

Signal 4: DAD1 D, Sig=280,4 Ref=360,100

Signal 5: DAD1 E, Sig=310,4 Ref=360,100

\*\*\* End of Report \*\*\*

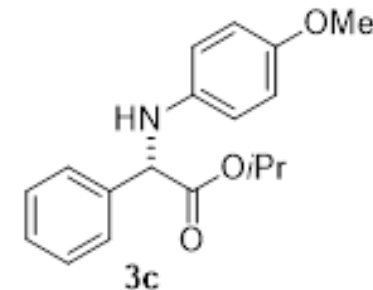



Sample Name:

```

=====
Acq. Operator   :                               Seq. Line : 17
Acq. Instrument : Instrument 1                   Location  : Vial 58
Injection Date  : 9/9/2020 9:07:33 PM           Inj       : 1
                                                Inj Volume: 5.000 µl
Different Inj Volume from Sequence ! Actual Inj Volume : 3.000 µl
Acq. Method    : C:\CHEM32\1\DATA\QDY 2020-09-09 16-35-55\IC-05-30.M
Last changed   : 9/9/2020 9:06:41 PM
                (modified after loading)
Analysis Method: C:\CHEM32\1\METHODS\IC-10-10.M
Last changed   : 9/10/2020 8:14:52 PM
                (modified after loading)
Additional Info : Peak(s) manually integrated
  
```

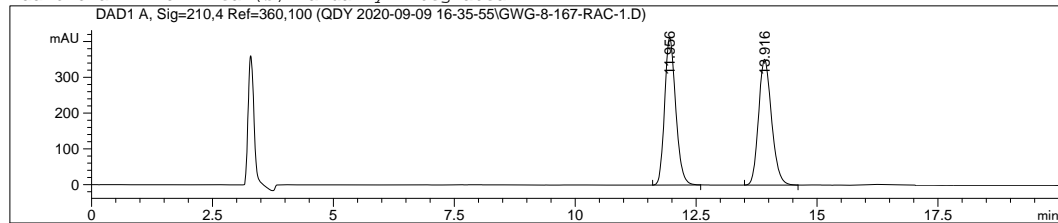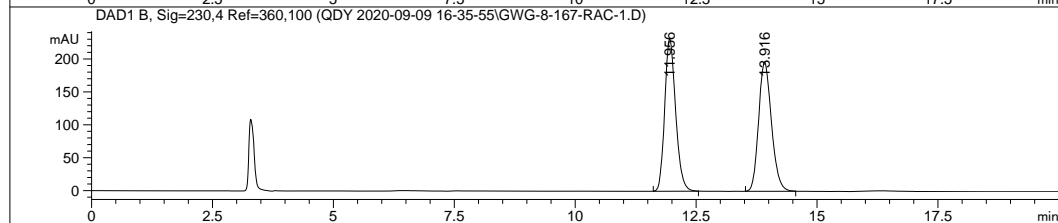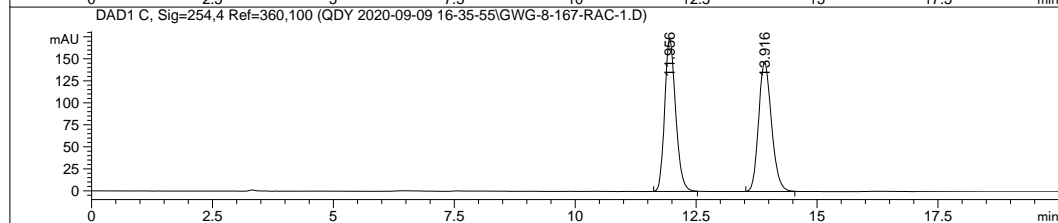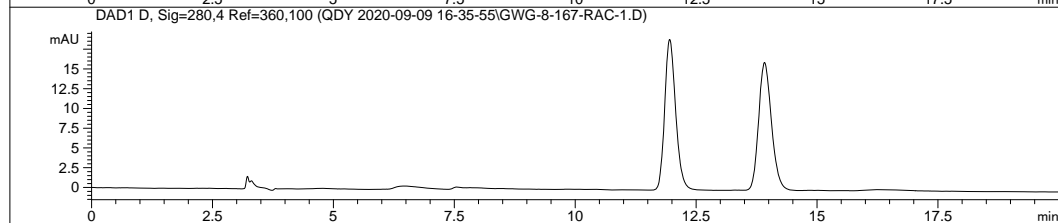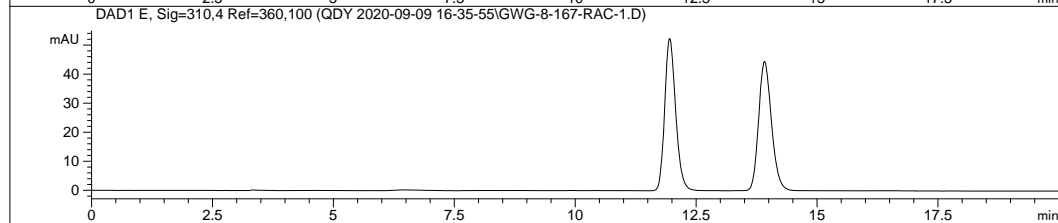

Sample Name:

```

=====
                          Area Percent Report
=====
Sorted By      :      Signal
Multiplier     :      1.0000
Dilution       :      1.0000
Use Multiplier & Dilution Factor with ISTDs
  
```

Signal 1: DAD1 A, Sig=210,4 Ref=360,100

| Peak # | RetTime [min] | Type | Width [min] | Area [mAU*s] | Height [mAU] | Area %  |
|--------|---------------|------|-------------|--------------|--------------|---------|
| 1      | 11.956        | BB   | 0.2461      | 6556.05420   | 411.06625    | 49.9083 |
| 2      | 13.916        | BB   | 0.2883      | 6580.14648   | 351.67401    | 50.0917 |

Totals : 1.31362e4 762.74026

Signal 2: DAD1 B, Sig=230,4 Ref=360,100

| Peak # | RetTime [min] | Type | Width [min] | Area [mAU*s] | Height [mAU] | Area %  |
|--------|---------------|------|-------------|--------------|--------------|---------|
| 1      | 11.956        | BB   | 0.2418      | 3641.34033   | 231.07304    | 50.0242 |
| 2      | 13.916        | BB   | 0.2860      | 3637.81128   | 196.51901    | 49.9758 |

Totals : 7279.15161 427.59206

Signal 3: DAD1 C, Sig=254,4 Ref=360,100

| Peak # | RetTime [min] | Type | Width [min] | Area [mAU*s] | Height [mAU] | Area %  |
|--------|---------------|------|-------------|--------------|--------------|---------|
| 1      | 11.956        | BB   | 0.2421      | 2728.55420   | 172.87291    | 50.0081 |
| 2      | 13.916        | BB   | 0.2863      | 2727.67480   | 147.14206    | 49.9919 |

Totals : 5456.22900 320.01497

Signal 4: DAD1 D, Sig=280,4 Ref=360,100

Signal 5: DAD1 E, Sig=310,4 Ref=360,100

\*\*\* End of Report \*\*\*

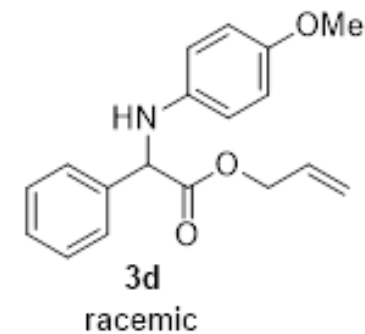

```

=====
Acq. Operator   :                               Seq. Line : 19
Acq. Instrument : Instrument 1                   Location   : Vial 57
Injection Date  : 9/10/2020 7:50:58 PM          Inj        : 1
                                                Inj Volume : 5.000 µl
Different Inj Volume from Sequence ! Actual Inj Volume : 3.000 µl
Acq. Method    : C:\CHEM32\1\DATA\QDY 2020-09-10 13-34-57\IC-05-30.M
Last changed   : 9/10/2020 8:10:29 PM          (modified after loading)
Analysis Method : C:\CHEM32\1\METHODS\IC-10-10.M
Last changed   : 9/10/2020 8:13:01 PM          (modified after loading)
Additional Info : Peak(s) manually integrated
  
```

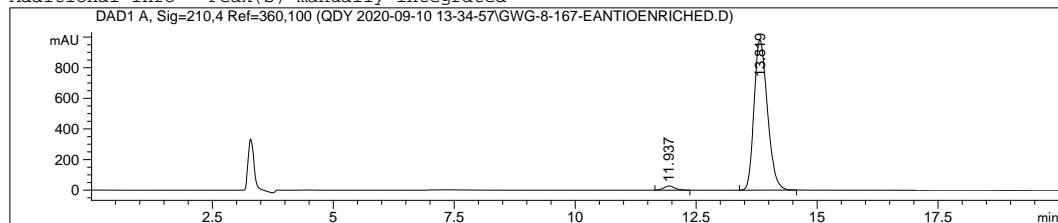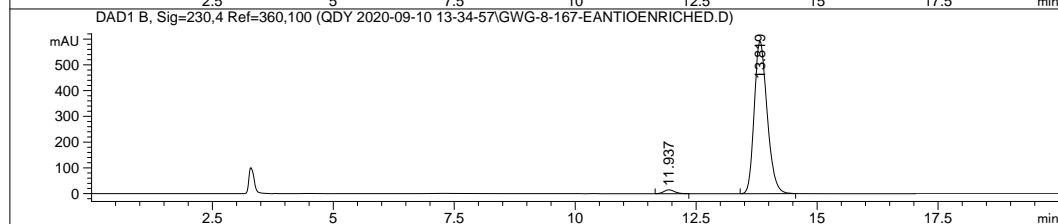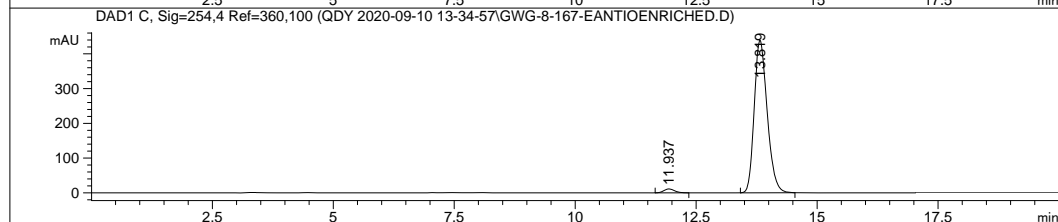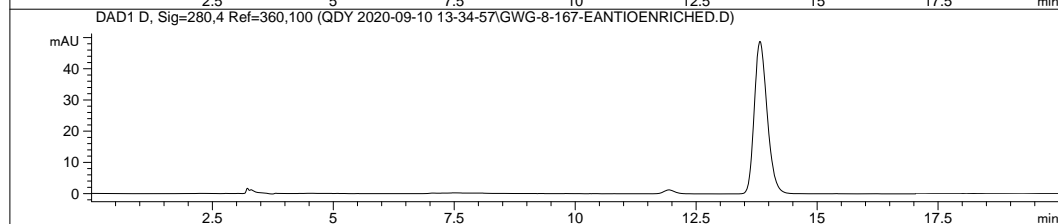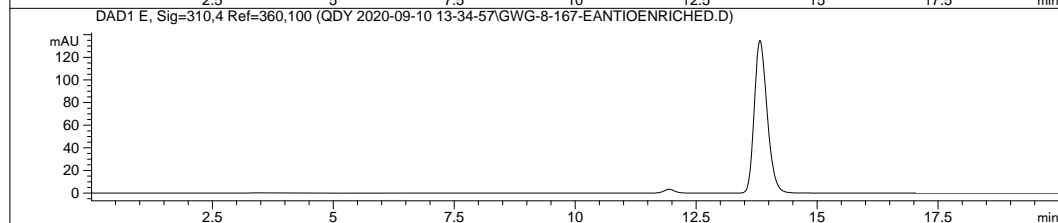

```

=====
                          Area Percent Report
=====
Sorted By      :      Signal
Multiplier     :      1.0000
Dilution       :      1.0000
Use Multiplier & Dilution Factor with ISTDs
  
```

Signal 1: DAD1 A, Sig=210,4 Ref=360,100

| Peak # | RetTime [min] | Type | Width [min] | Area [mAU*s] | Height [mAU] | Area %  |
|--------|---------------|------|-------------|--------------|--------------|---------|
| 1      | 11.937        | BB   | 0.2389      | 430.23438    | 27.74086     | 2.2309  |
| 2      | 13.819        | BB   | 0.2983      | 1.88553e4    | 980.63647    | 97.7691 |

Totals : 1.92855e4 1008.37733

Signal 2: DAD1 B, Sig=230,4 Ref=360,100

| Peak # | RetTime [min] | Type | Width [min] | Area [mAU*s] | Height [mAU] | Area %  |
|--------|---------------|------|-------------|--------------|--------------|---------|
| 1      | 11.937        | BB   | 0.2387      | 233.41516    | 15.06614     | 2.0812  |
| 2      | 13.819        | BB   | 0.2863      | 1.09820e4    | 592.40356    | 97.9188 |

Totals : 1.12154e4 607.46970

Signal 3: DAD1 C, Sig=254,4 Ref=360,100

| Peak # | RetTime [min] | Type | Width [min] | Area [mAU*s] | Height [mAU] | Area %  |
|--------|---------------|------|-------------|--------------|--------------|---------|
| 1      | 11.937        | BB   | 0.2389      | 175.86203    | 11.34225     | 2.1052  |
| 2      | 13.819        | BB   | 0.2873      | 8177.84814   | 439.11755    | 97.8948 |

Totals : 8353.71017 450.45981

Signal 4: DAD1 D, Sig=280,4 Ref=360,100

Signal 5: DAD1 E, Sig=310,4 Ref=360,100

\*\*\* End of Report \*\*\*

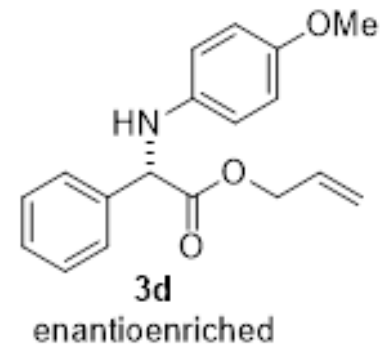

```

=====
Acq. Operator   :                               Seq. Line :    5
Acq. Instrument : Instrument 1                   Location  : Vial 54
Injection Date  : 8/28/2020 2:38:32 PM          Inj       :    1
                                                Inj Volume: 5.000 µl
Different Inj Volume from Sequence ! Actual Inj Volume : 3.000 µl
Acq. Method    : C:\CHEM32\1\DATA\QDY 2020-08-28 12-36-52\IC-05-30.M
Last changed   : 8/28/2020 1:04:13 PM
                (modified after loading)
Analysis Method: C:\CHEM32\1\METHODS\IC-10-10.M
Last changed   : 9/1/2020 3:40:05 PM
                (modified after loading)
Additional Info : Peak(s) manually integrated
  
```

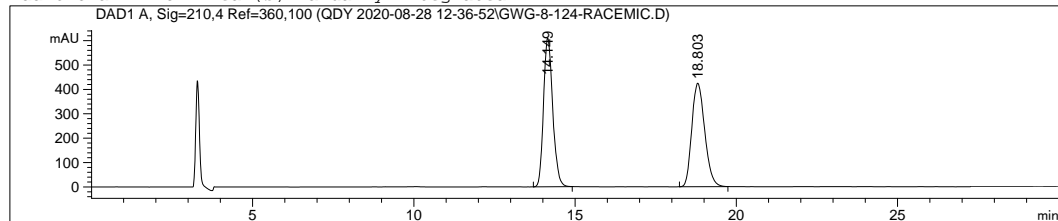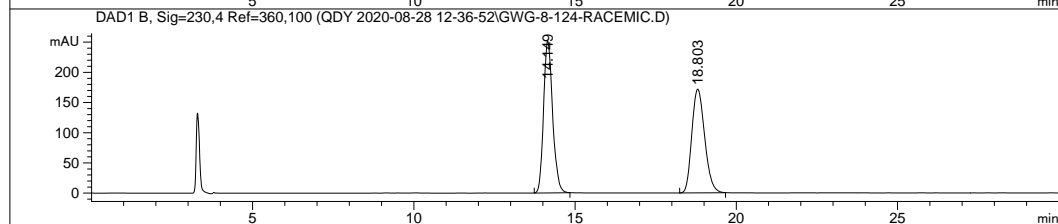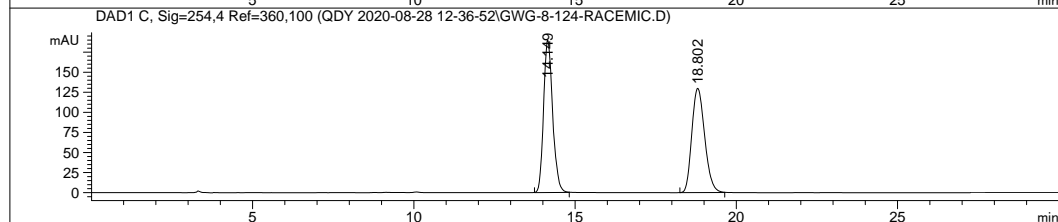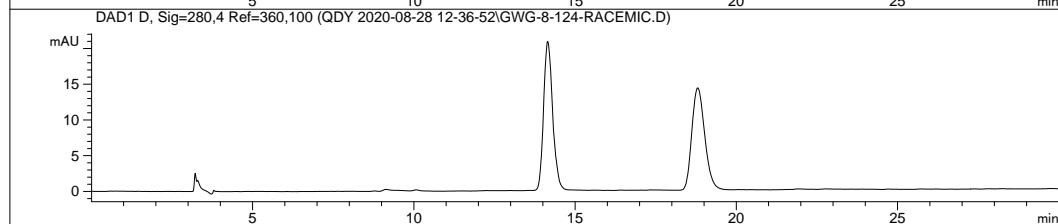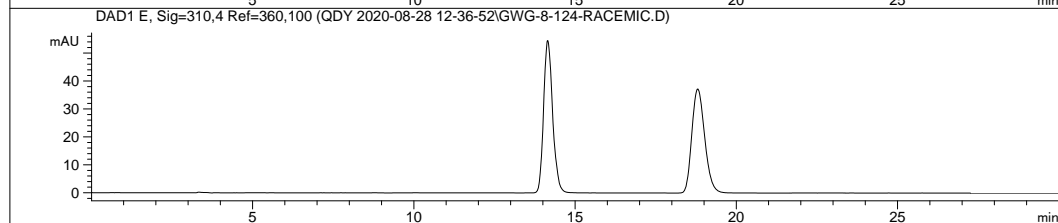

```

=====
                          Area Percent Report
=====
Sorted By      :      Signal
Multiplier    :      1.0000
Dilution      :      1.0000
Use Multiplier & Dilution Factor with ISTDs
  
```

Signal 1: DAD1 A, Sig=210,4 Ref=360,100

| Peak # | RetTime [min] | Type | Width [min] | Area [mAU*s] | Height [mAU] | Area %  |
|--------|---------------|------|-------------|--------------|--------------|---------|
| 1      | 14.149        | BB   | 0.3071      | 1.20880e4    | 610.33667    | 50.4652 |
| 2      | 18.803        | BB   | 0.4379      | 1.18651e4    | 424.71149    | 49.5348 |

Totals : 2.39531e4 1035.04816

Signal 2: DAD1 B, Sig=230,4 Ref=360,100

| Peak # | RetTime [min] | Type | Width [min] | Area [mAU*s] | Height [mAU] | Area %  |
|--------|---------------|------|-------------|--------------|--------------|---------|
| 1      | 14.149        | BB   | 0.3013      | 4897.87598   | 251.34285    | 50.7380 |
| 2      | 18.803        | BB   | 0.4346      | 4755.40186   | 171.97484    | 49.2620 |

Totals : 9653.27783 423.31769

Signal 3: DAD1 C, Sig=254,4 Ref=360,100

| Peak # | RetTime [min] | Type | Width [min] | Area [mAU*s] | Height [mAU] | Area %  |
|--------|---------------|------|-------------|--------------|--------------|---------|
| 1      | 14.149        | BB   | 0.3017      | 3700.36816   | 189.61874    | 50.7212 |
| 2      | 18.802        | BB   | 0.4348      | 3595.13086   | 129.95302    | 49.2788 |

Totals : 7295.49902 319.57176

Signal 4: DAD1 D, Sig=280,4 Ref=360,100

Signal 5: DAD1 E, Sig=310,4 Ref=360,100

\*\*\* End of Report \*\*\*

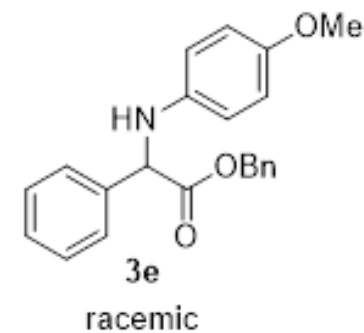

Sample Name:

```

=====
Acq. Operator   :                               Seq. Line :    4
Acq. Instrument : Instrument 1                   Location  : Vial 53
Injection Date  : 8/28/2020 2:07:30 PM         Inj       :    1
                                                Inj Volume: 5.000 µl
Different Inj Volume from Sequence ! Actual Inj Volume : 3.000 µl
Acq. Method    : C:\CHEM32\1\DATA\QDY 2020-08-28 12-36-52\IC-05-30.M
Last changed   : 8/28/2020 1:04:13 PM
                (modified after loading)
Analysis Method: C:\CHEM32\1\METHODS\IC-10-10.M
Last changed   : 9/1/2020 3:40:05 PM
                (modified after loading)
Additional Info : Peak(s) manually integrated
  
```

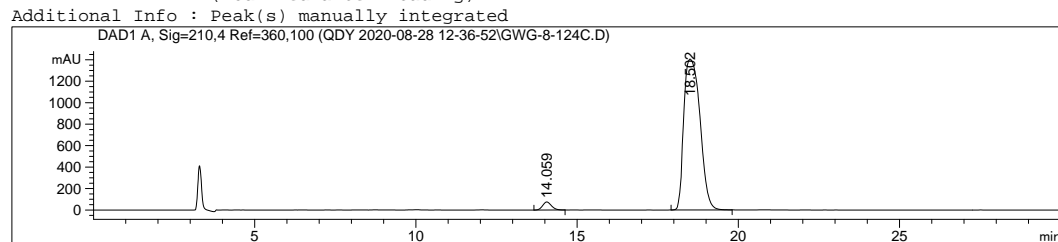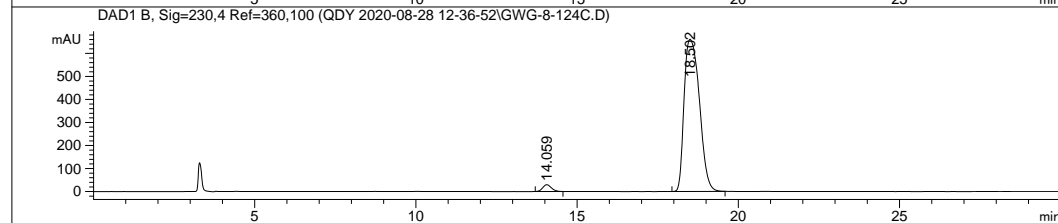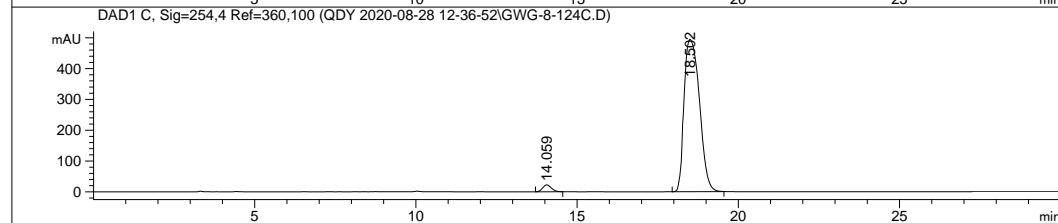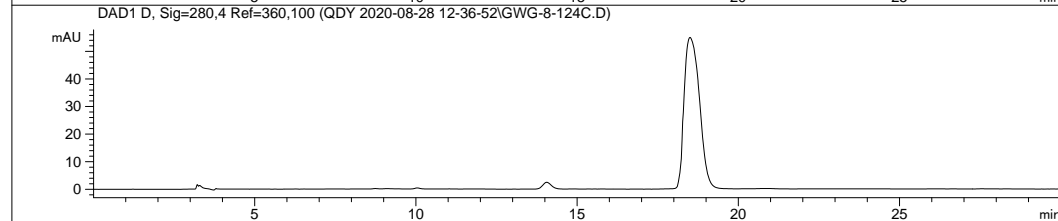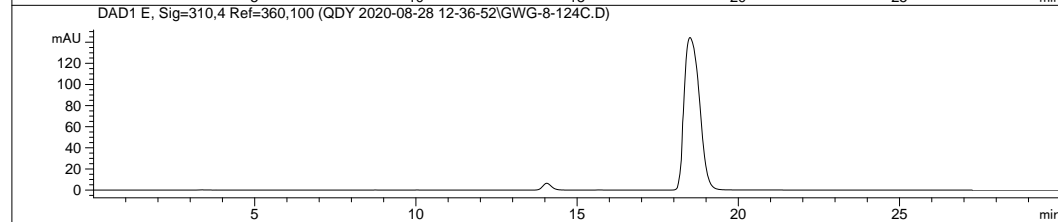

Sample Name:

## Area Percent Report

```

=====
Sorted By      :      Signal
Multiplier     :      1.0000
Dilution       :      1.0000
Use Multiplier & Dilution Factor with ISTDs
  
```

Signal 1: DAD1 A, Sig=210,4 Ref=360,100

| Peak # | RetTime [min] | Type | Width [min] | Area [mAU*s] | Height [mAU] | Area %  |
|--------|---------------|------|-------------|--------------|--------------|---------|
| 1      | 14.059        | BB   | 0.2938      | 1432.52673   | 75.36388     | 2.8319  |
| 2      | 18.502        | BB   | 0.5758      | 4.91529e4    | 1406.31335   | 97.1681 |

Totals : 5.05854e4 1481.67724

Signal 2: DAD1 B, Sig=230,4 Ref=360,100

| Peak # | RetTime [min] | Type | Width [min] | Area [mAU*s] | Height [mAU] | Area %  |
|--------|---------------|------|-------------|--------------|--------------|---------|
| 1      | 14.059        | BB   | 0.2925      | 561.97382    | 29.72887     | 2.5101  |
| 2      | 18.502        | BB   | 0.5430      | 2.18265e4    | 661.41437    | 97.4899 |

Totals : 2.23885e4 691.14324

Signal 3: DAD1 C, Sig=254,4 Ref=360,100

| Peak # | RetTime [min] | Type | Width [min] | Area [mAU*s] | Height [mAU] | Area %  |
|--------|---------------|------|-------------|--------------|--------------|---------|
| 1      | 14.059        | BB   | 0.2925      | 425.81079    | 22.53081     | 2.5342  |
| 2      | 18.502        | BB   | 0.5443      | 1.63766e4    | 494.56448    | 97.4658 |

Totals : 1.68024e4 517.09530

Signal 4: DAD1 D, Sig=280,4 Ref=360,100

Signal 5: DAD1 E, Sig=310,4 Ref=360,100

\*\*\* End of Report \*\*\*

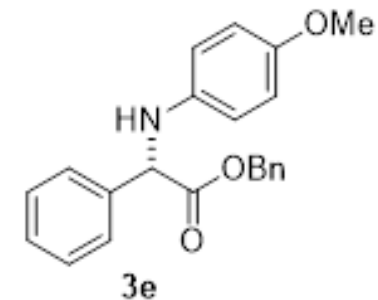

Sample Name:

```

=====
Acq. Operator   :                               Seq. Line :    2
Acq. Instrument : Instrument 1                   Location  : Vial 51
Injection Date  : 9/3/2020 3:15:26 PM          Inj       :    1
                                                Inj Volume: 5.000 µl
Different Inj Volume from Sequence ! Actual Inj Volume : 3.000 µl
Acq. Method    : C:\CHEM32\1\DATA\QDY 2020-09-03 15-02-13\IC-05-30.M
Last changed   : 9/3/2020 3:35:41 PM
                (modified after loading)
Analysis Method: C:\CHEM32\1\METHODS\IC-10-10.M
Last changed   : 9/1/2020 3:40:05 PM
                (modified after loading)
Additional Info : Peak(s) manually integrated
  
```

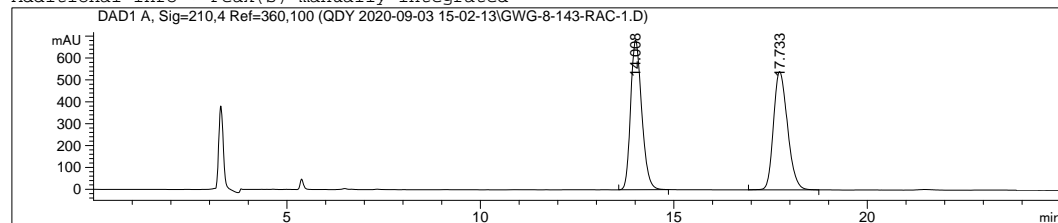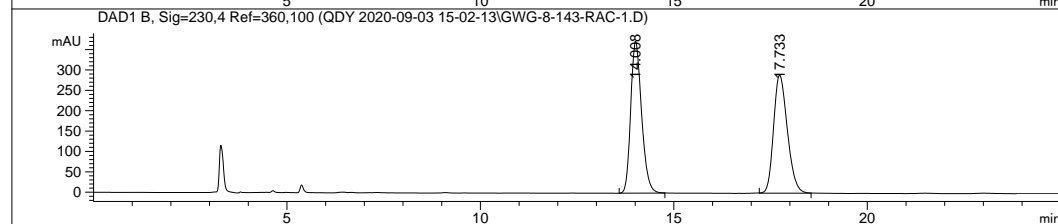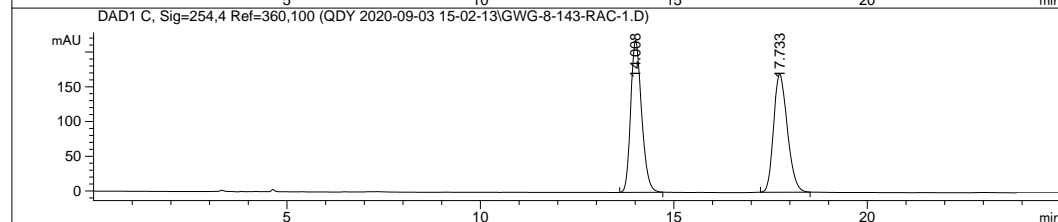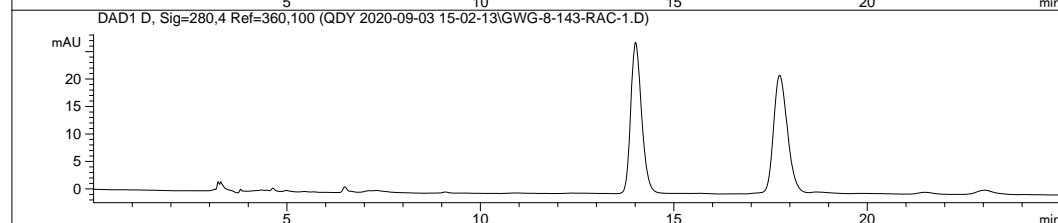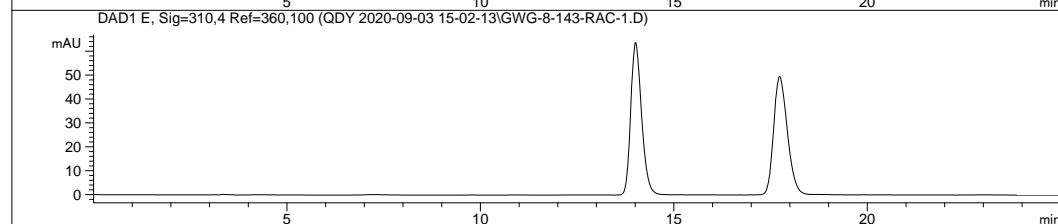

Sample Name:

```

=====
                          Area Percent Report
=====
Sorted By      :      Signal
Multiplier     :      1.0000
Dilution       :      1.0000
Use Multiplier & Dilution Factor with ISTDs
  
```

Signal 1: DAD1 A, Sig=210,4 Ref=360,100

| Peak # | RetTime [min] | Type | Width [min] | Area [mAU*s] | Height [mAU] | Area %  |
|--------|---------------|------|-------------|--------------|--------------|---------|
| 1      | 14.008        | BB   | 0.3093      | 1.36875e4    | 684.36139    | 50.1823 |
| 2      | 17.733        | BB   | 0.3892      | 1.35881e4    | 540.68433    | 49.8177 |

Totals : 2.72756e4 1225.04572

Signal 2: DAD1 B, Sig=230,4 Ref=360,100

| Peak # | RetTime [min] | Type | Width [min] | Area [mAU*s] | Height [mAU] | Area %  |
|--------|---------------|------|-------------|--------------|--------------|---------|
| 1      | 14.008        | BB   | 0.3025      | 7305.53760   | 372.99680    | 50.5403 |
| 2      | 17.733        | BB   | 0.3816      | 7149.33887   | 290.05386    | 49.4597 |

Totals : 1.44549e4 663.05066

Signal 3: DAD1 C, Sig=254,4 Ref=360,100

| Peak # | RetTime [min] | Type | Width [min] | Area [mAU*s] | Height [mAU] | Area %  |
|--------|---------------|------|-------------|--------------|--------------|---------|
| 1      | 14.008        | BB   | 0.3029      | 4295.03418   | 218.90845    | 50.5388 |
| 2      | 17.733        | BB   | 0.3837      | 4203.46240   | 170.46912    | 49.4612 |

Totals : 8498.49658 389.37756

Signal 4: DAD1 D, Sig=280,4 Ref=360,100

Signal 5: DAD1 E, Sig=310,4 Ref=360,100

\*\*\* End of Report \*\*\*

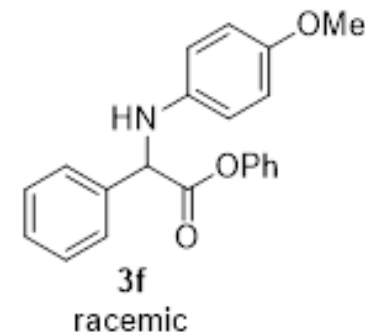

```

=====
Acq. Operator   :                               Seq. Line :    4
Acq. Instrument : Instrument 1                   Location  : Vial 52
Injection Date  : 9/3/2020 3:52:39 PM           Inj       :    1
                                                    Inj Volume: 5.000 µl
Different Inj Volume from Sequence ! Actual Inj Volume : 3.000 µl
Acq. Method    : C:\CHEM32\1\DATA\QDY 2020-09-03 15-02-13\IC-05-30.M
Last changed   : 8/23/2012 1:59:23 PM
Analysis Method: C:\CHEM32\1\METHODS\IC-10-10.M
Last changed   : 9/1/2020 3:40:05 PM
                (modified after loading)
    
```

Additional Info : Peak(s) manually integrated

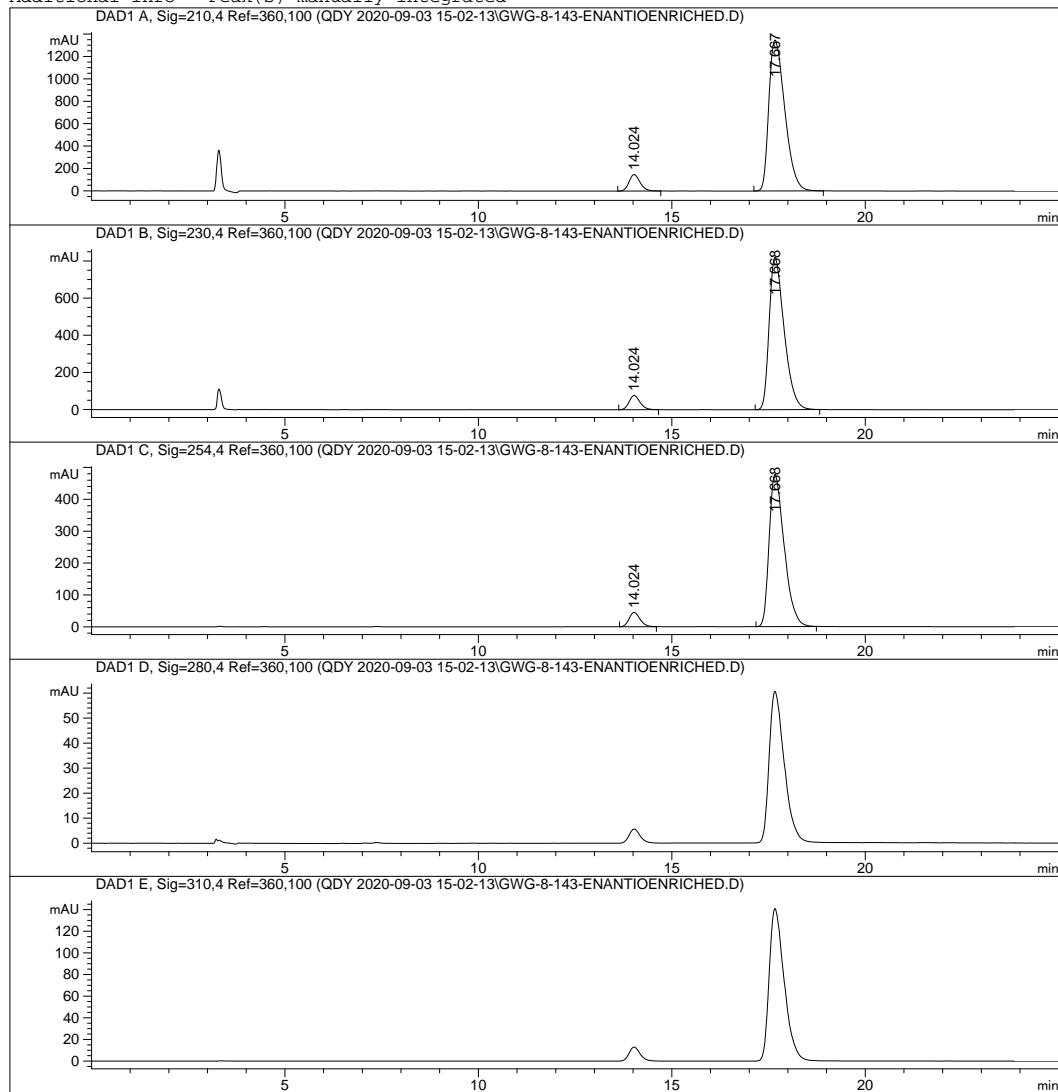

```

=====
                          Area Percent Report
=====
Sorted By      :      Signal
Multiplier     :      1.0000
Dilution      :      1.0000
Use Multiplier & Dilution Factor with ISTDs
    
```

Signal 1: DAD1 A, Sig=210,4 Ref=360,100

| Peak # | RetTime [min] | Type | Width [min] | Area [mAU*s] | Height [mAU] | Area %  |
|--------|---------------|------|-------------|--------------|--------------|---------|
| 1      | 14.024        | BB   | 0.3060      | 2927.62671   | 147.23438    | 7.0401  |
| 2      | 17.667        | BB   | 0.4468      | 3.86576e4    | 1347.08411   | 92.9599 |

Totals : 4.15852e4 1494.31848

Signal 2: DAD1 B, Sig=230,4 Ref=360,100

| Peak # | RetTime [min] | Type | Width [min] | Area [mAU*s] | Height [mAU] | Area %  |
|--------|---------------|------|-------------|--------------|--------------|---------|
| 1      | 14.024        | BB   | 0.3049      | 1509.46753   | 76.25905     | 6.4015  |
| 2      | 17.668        | BB   | 0.4117      | 2.20706e4    | 820.78735    | 93.5985 |

Totals : 2.35800e4 897.04640

Signal 3: DAD1 C, Sig=254,4 Ref=360,100

| Peak # | RetTime [min] | Type | Width [min] | Area [mAU*s] | Height [mAU] | Area %  |
|--------|---------------|------|-------------|--------------|--------------|---------|
| 1      | 14.024        | BB   | 0.3045      | 890.23651    | 45.05556     | 6.4546  |
| 2      | 17.668        | BB   | 0.4131      | 1.29020e4    | 477.75421    | 93.5454 |

Totals : 1.37922e4 522.80977

Signal 4: DAD1 D, Sig=280,4 Ref=360,100

Signal 5: DAD1 E, Sig=310,4 Ref=360,100

\*\*\* End of Report \*\*\*

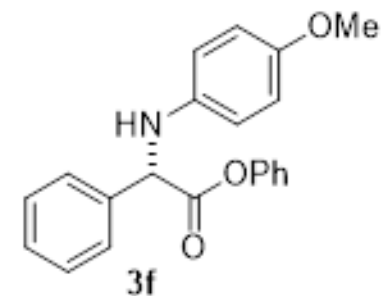

enantioenriched

```

=====
Acq. Operator   :                               Seq. Line :    2
Acq. Instrument : Instrument 1                   Location  : Vial 57
Injection Date  : 9/2/2020 6:04:01 PM           Inj       :    1
                                                Inj Volume: 5.000 µl
Different Inj Volume from Sequence ! Actual Inj Volume : 3.000 µl
Acq. Method    : C:\CHEM32\1\DATA\QDY 2020-09-02 17-50-41\IC-05-30.M
Last changed   : 9/2/2020 6:28:48 PM
                (modified after loading)
Analysis Method: C:\CHEM32\1\METHODS\IC-10-10.M
Last changed   : 9/1/2020 3:40:05 PM
                (modified after loading)
Additional Info : Peak(s) manually integrated
  
```

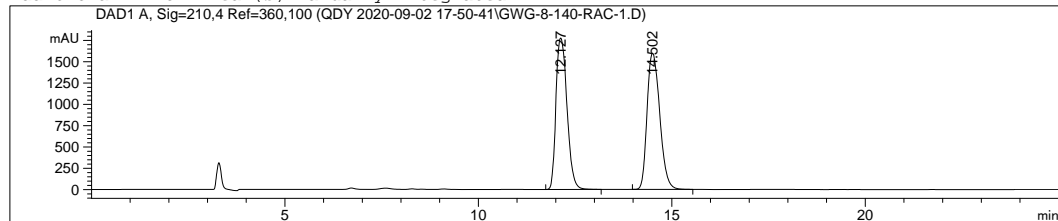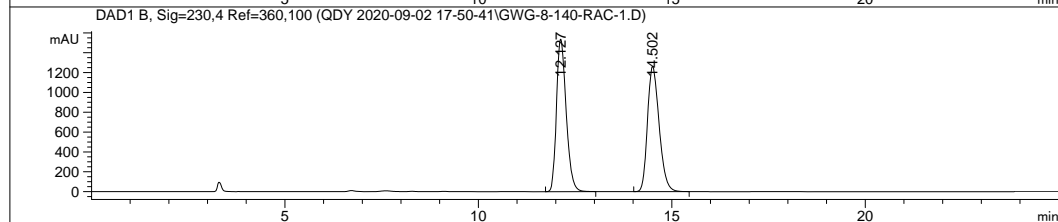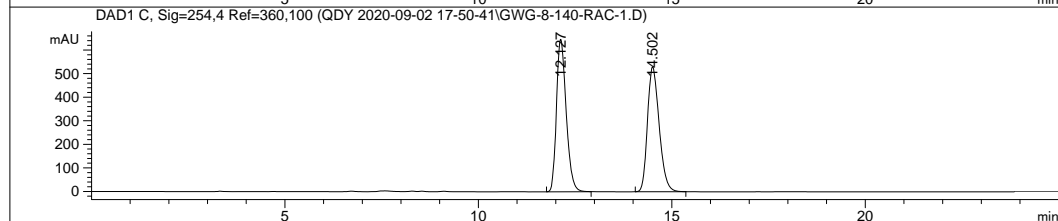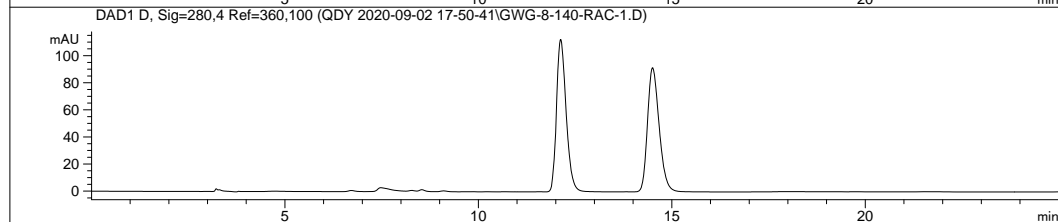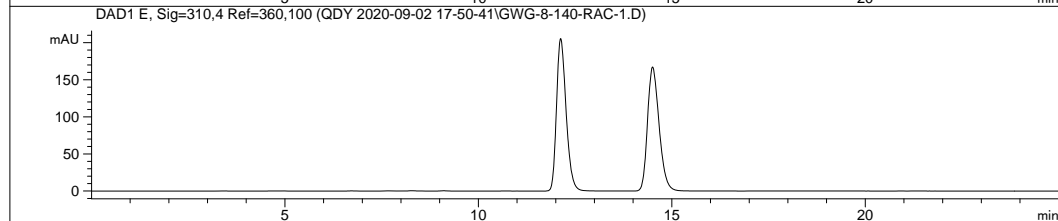

```

=====
                          Area Percent Report
=====
Sorted By      :      Signal
Multiplier     :      1.0000
Dilution       :      1.0000
Use Multiplier & Dilution Factor with ISTDs
  
```

Signal 1: DAD1 A, Sig=210,4 Ref=360,100

| Peak # | RetTime [min] | Type | Width [min] | Area [mAU*s] | Height [mAU] | Area %  |
|--------|---------------|------|-------------|--------------|--------------|---------|
| 1      | 12.127        | BB   | 0.3145      | 3.50981e4    | 1776.35156   | 49.0493 |
| 2      | 14.502        | BB   | 0.3623      | 3.64587e4    | 1596.97571   | 50.9507 |

Totals : 7.15568e4 3373.32727

Signal 2: DAD1 B, Sig=230,4 Ref=360,100

| Peak # | RetTime [min] | Type | Width [min] | Area [mAU*s] | Height [mAU] | Area %  |
|--------|---------------|------|-------------|--------------|--------------|---------|
| 1      | 12.127        | BB   | 0.2690      | 2.67558e4    | 1537.37354   | 50.2862 |
| 2      | 14.502        | BB   | 0.3245      | 2.64513e4    | 1262.39563   | 49.7138 |

Totals : 5.32071e4 2799.76917

Signal 3: DAD1 C, Sig=254,4 Ref=360,100

| Peak # | RetTime [min] | Type | Width [min] | Area [mAU*s] | Height [mAU] | Area %  |
|--------|---------------|------|-------------|--------------|--------------|---------|
| 1      | 12.127        | BB   | 0.2691      | 1.12604e4    | 646.95313    | 50.2751 |
| 2      | 14.502        | BB   | 0.3252      | 1.11372e4    | 529.95831    | 49.7249 |

Totals : 2.23976e4 1176.91144

Signal 4: DAD1 D, Sig=280,4 Ref=360,100

Signal 5: DAD1 E, Sig=310,4 Ref=360,100

\*\*\* End of Report \*\*\*

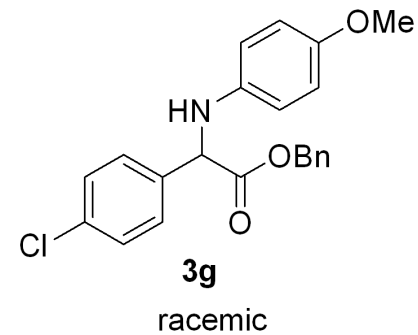

```

=====
Acq. Operator   :                               Seq. Line :    3
Acq. Instrument : Instrument 1                   Location  : Vial 58
Injection Date  : 9/2/2020 6:30:06 PM           Inj       :    1
                                                    Inj Volume: 5.000 µl
Different Inj Volume from Sequence ! Actual Inj Volume : 3.000 µl
Acq. Method    : C:\CHEM32\1\DATA\QDY 2020-09-02 17-50-41\IC-05-30.M
Last changed   : 9/2/2020 6:28:48 PM
                (modified after loading)
Analysis Method: C:\CHEM32\1\METHODS\IC-10-10.M
Last changed   : 9/1/2020 3:40:05 PM
                (modified after loading)
Additional Info : Peak(s) manually integrated
    
```

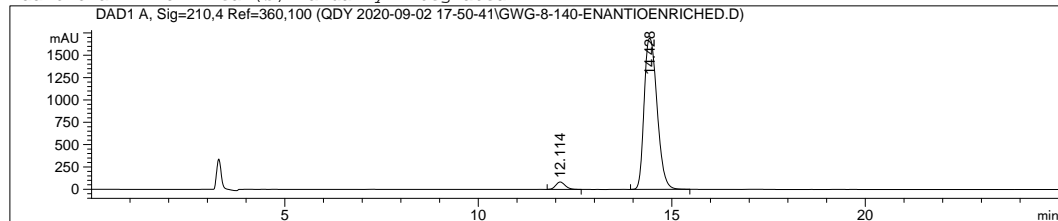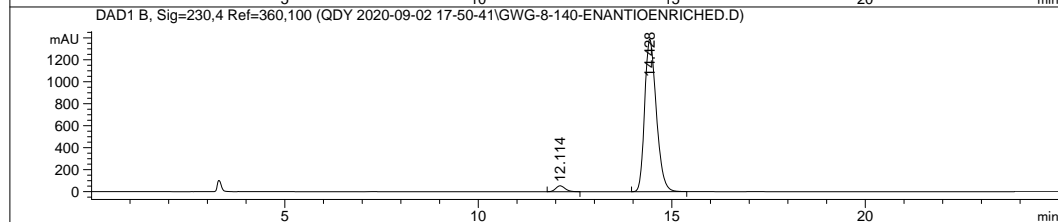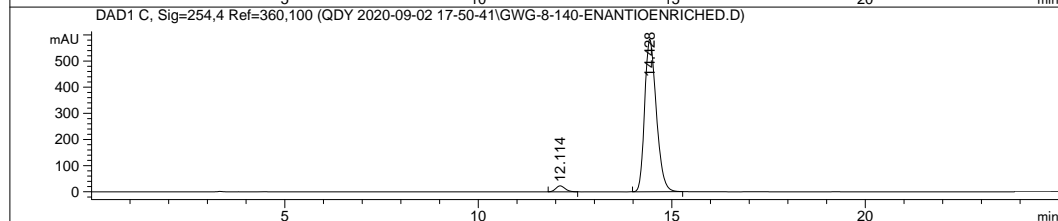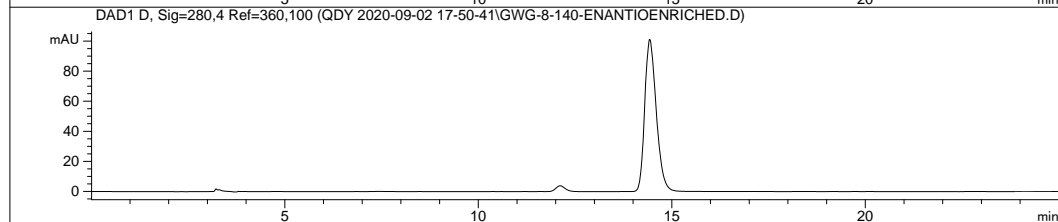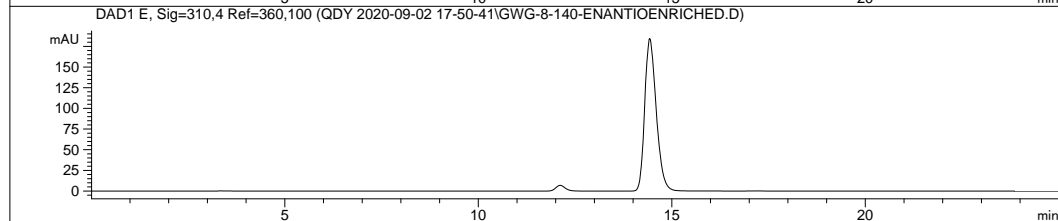

```

=====
                          Area Percent Report
=====
Sorted By      :      Signal
Multiplier     :      1.0000
Dilution       :      1.0000
Use Multiplier & Dilution Factor with ISTDs
    
```

Signal 1: DAD1 A, Sig=210,4 Ref=360,100

| Peak # | RetTime [min] | Type | Width [min] | Area [mAU*s] | Height [mAU] | Area %  |
|--------|---------------|------|-------------|--------------|--------------|---------|
| 1      | 12.114        | BB   | 0.2598      | 1414.02136   | 83.41586     | 3.4784  |
| 2      | 14.428        | BB   | 0.3682      | 3.92375e4    | 1694.03796   | 96.5216 |

Totals : 4.06515e4 1777.45383

Signal 2: DAD1 B, Sig=230,4 Ref=360,100

| Peak # | RetTime [min] | Type | Width [min] | Area [mAU*s] | Height [mAU] | Area %  |
|--------|---------------|------|-------------|--------------|--------------|---------|
| 1      | 12.114        | BB   | 0.2594      | 907.84955    | 53.65527     | 3.0301  |
| 2      | 14.428        | BB   | 0.3241      | 2.90529e4    | 1388.43530   | 96.9699 |

Totals : 2.99607e4 1442.09057

Signal 3: DAD1 C, Sig=254,4 Ref=360,100

| Peak # | RetTime [min] | Type | Width [min] | Area [mAU*s] | Height [mAU] | Area %  |
|--------|---------------|------|-------------|--------------|--------------|---------|
| 1      | 12.114        | BB   | 0.2588      | 385.92538    | 22.88168     | 3.0589  |
| 2      | 14.428        | BB   | 0.3246      | 1.22307e4    | 583.26300    | 96.9411 |

Totals : 1.26166e4 606.14468

Signal 4: DAD1 D, Sig=280,4 Ref=360,100

Signal 5: DAD1 E, Sig=310,4 Ref=360,100

\*\*\* End of Report \*\*\*

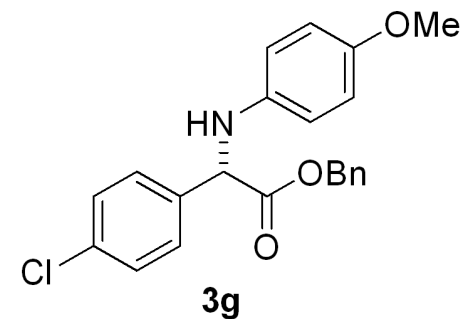

enantioenriched



Sample Name:

```

=====
Acq. Operator   :                               Seq. Line :    5
Acq. Instrument : Instrument 1                  Location  : Vial 59
Injection Date  : 9/2/2020 7:07:39 PM         Inj       :    1
                                                Inj Volume: 5.000 µl
Different Inj Volume from Sequence ! Actual Inj Volume : 3.000 µl
Acq. Method    : C:\CHEM32\1\DATA\QDY 2020-09-02 17-50-41\IC-05-30.M
Last changed   : 9/2/2020 7:18:35 PM
                (modified after loading)
Analysis Method: C:\CHEM32\1\METHODS\IC-10-10.M
Last changed   : 9/1/2020 3:40:05 PM
                (modified after loading)
Additional Info : Peak(s) manually integrated
  
```

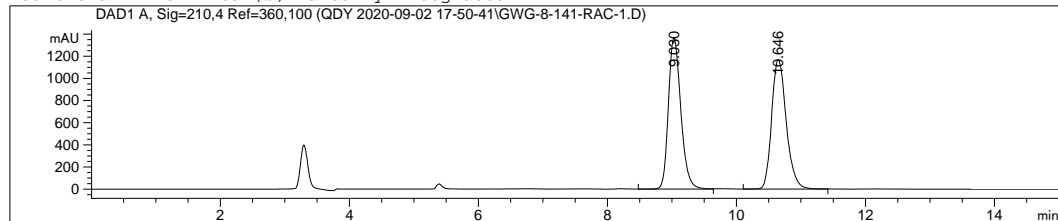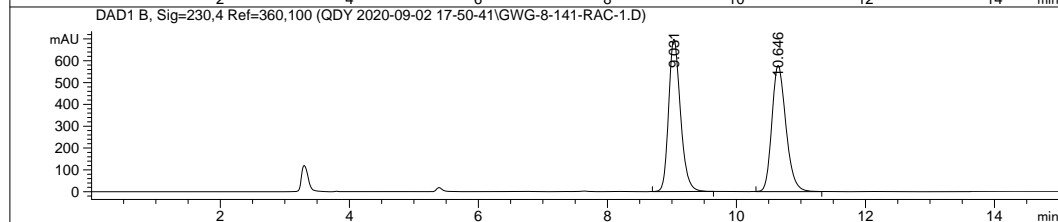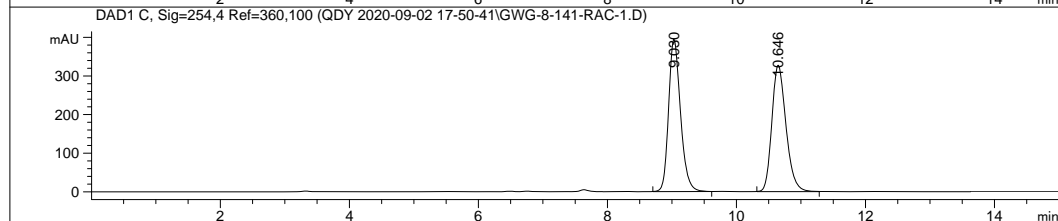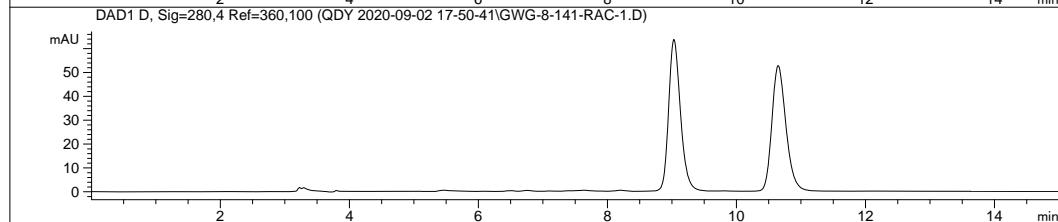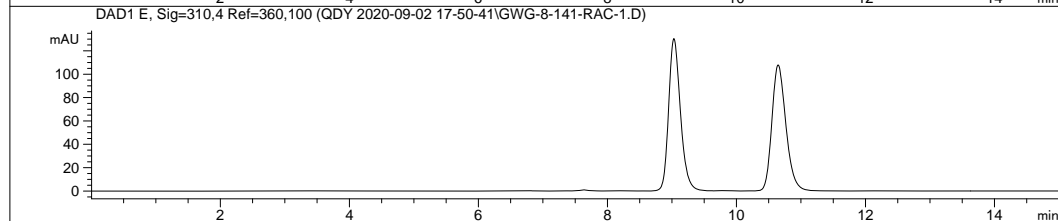

Sample Name:

```

=====
                          Area Percent Report
=====
Sorted By      :      Signal
Multiplier    :      1.0000
Dilution      :      1.0000
Use Multiplier & Dilution Factor with ISTDs
  
```

Signal 1: DAD1 A, Sig=210,4 Ref=360,100

| Peak # | RetTime [min] | Type | Width [min] | Area [mAU*s] | Height [mAU] | Area %  |
|--------|---------------|------|-------------|--------------|--------------|---------|
| 1      | 9.030         | VV   | 0.2083      | 1.82759e4    | 1363.92664   | 49.8949 |
| 2      | 10.646        | VB   | 0.2432      | 1.83529e4    | 1168.99854   | 50.1051 |

Totals : 3.66288e4 2532.92517

Signal 2: DAD1 B, Sig=230,4 Ref=360,100

| Peak # | RetTime [min] | Type | Width [min] | Area [mAU*s] | Height [mAU] | Area %  |
|--------|---------------|------|-------------|--------------|--------------|---------|
| 1      | 9.031         | BB   | 0.1943      | 8875.26563   | 698.10834    | 50.3599 |
| 2      | 10.646        | BB   | 0.2327      | 8748.42285   | 577.68878    | 49.6401 |

Totals : 1.76237e4 1275.79712

Signal 3: DAD1 C, Sig=254,4 Ref=360,100

| Peak # | RetTime [min] | Type | Width [min] | Area [mAU*s] | Height [mAU] | Area %  |
|--------|---------------|------|-------------|--------------|--------------|---------|
| 1      | 9.030         | BB   | 0.1953      | 5043.11377   | 394.09100    | 50.3434 |
| 2      | 10.646        | BB   | 0.2335      | 4974.31445   | 327.04181    | 49.6566 |

Totals : 1.00174e4 721.13281

Signal 4: DAD1 D, Sig=280,4 Ref=360,100

Signal 5: DAD1 E, Sig=310,4 Ref=360,100

\*\*\* End of Report \*\*\*

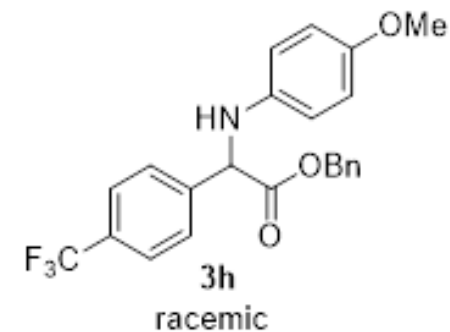

```

=====
Acq. Operator   :                               Seq. Line :    6
Acq. Instrument : Instrument 1                   Location  : Vial 60
Injection Date  : 9/2/2020 7:23:43 PM           Inj       :    1
                                                    Inj Volume: 5.000 µl
Different Inj Volume from Sequence !           Actual Inj Volume : 3.000 µl
Acq. Method    : C:\CHEM32\1\DATA\QDY 2020-09-02 17-50-41\IC-05-30.M
Last changed   : 9/2/2020 7:18:35 PM
                                                    (modified after loading)
Analysis Method : C:\CHEM32\1\METHODS\IC-10-10.M
Last changed   : 9/1/2020 3:40:05 PM
                                                    (modified after loading)
Additional Info : Peak(s) manually integrated
  
```

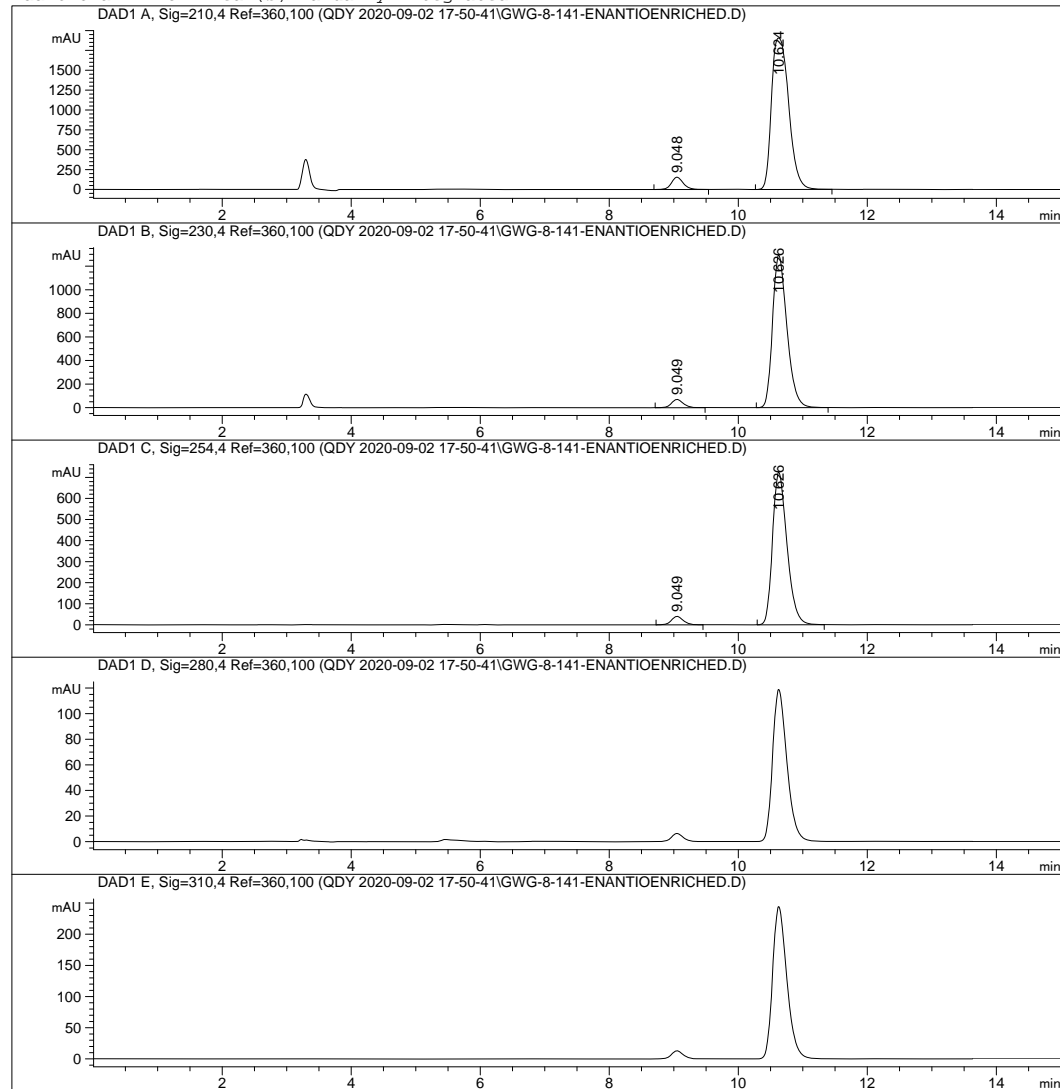

```

=====
                          Area Percent Report
=====
Sorted By      :      Signal
Multiplier     :      1.0000
Dilution       :      1.0000
Use Multiplier & Dilution Factor with ISTDs
  
```

Signal 1: DAD1 A, Sig=210,4 Ref=360,100

| Peak # | RetTime [min] | Type | Width [min] | Area [mAU*s] | Height [mAU] | Area %  |
|--------|---------------|------|-------------|--------------|--------------|---------|
| 1      | 9.048         | BB   | 0.1953      | 1980.82336   | 154.80215    | 5.3162  |
| 2      | 10.624        | BB   | 0.2940      | 3.52791e4    | 1905.22363   | 94.6838 |

Totals : 3.72600e4 2060.02579

Signal 2: DAD1 B, Sig=230,4 Ref=360,100

| Peak # | RetTime [min] | Type | Width [min] | Area [mAU*s] | Height [mAU] | Area %  |
|--------|---------------|------|-------------|--------------|--------------|---------|
| 1      | 9.049         | BB   | 0.1948      | 897.21790    | 70.34921     | 4.2891  |
| 2      | 10.626        | BB   | 0.2407      | 2.00215e4    | 1292.87073   | 95.7109 |

Totals : 2.09187e4 1363.21993

Signal 3: DAD1 C, Sig=254,4 Ref=360,100

| Peak # | RetTime [min] | Type | Width [min] | Area [mAU*s] | Height [mAU] | Area %  |
|--------|---------------|------|-------------|--------------|--------------|---------|
| 1      | 9.049         | BB   | 0.1955      | 515.98309    | 40.27771     | 4.3768  |
| 2      | 10.626        | BB   | 0.2417      | 1.12731e4    | 723.74994    | 95.6232 |

Totals : 1.17890e4 764.02765

Signal 4: DAD1 D, Sig=280,4 Ref=360,100

Signal 5: DAD1 E, Sig=310,4 Ref=360,100

\*\*\* End of Report \*\*\*

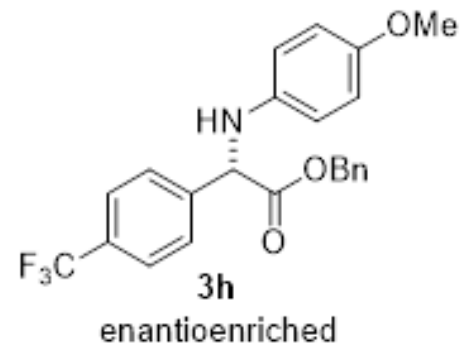

```

=====
Acq. Operator   :                               Seq. Line :    8
Acq. Instrument : Instrument 1                   Location   : Vial 56
Injection Date  : 9/10/2020 4:19:15 PM          Inj        :    1
                                                Inj Volume : 5.000 µl
Different Inj Volume from Sequence ! Actual Inj Volume : 3.000 µl
Acq. Method    : C:\CHEM32\1\DATA\QDY 2020-09-10 13-34-57\IC-05-30.M
Last changed   : 8/23/2012 1:59:23 PM
Analysis Method : C:\CHEM32\1\METHODS\IC-10-10.M
Last changed   : 9/10/2020 8:08:46 PM
                (modified after loading)
Additional Info : Peak(s) manually integrated
    
```

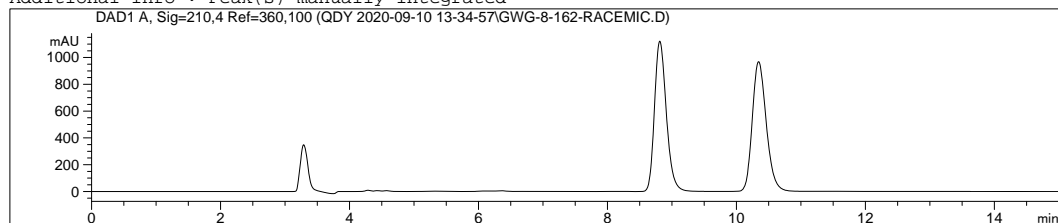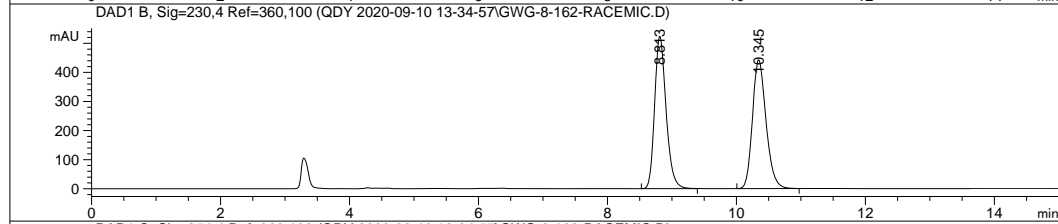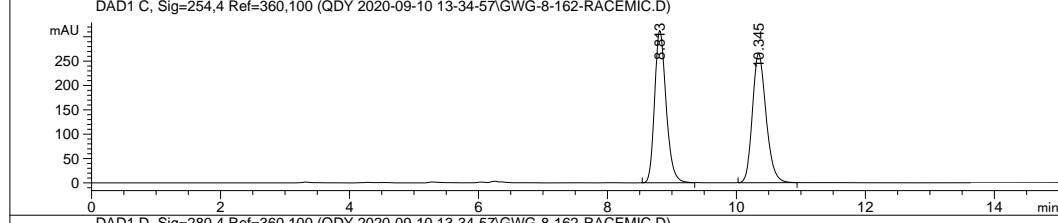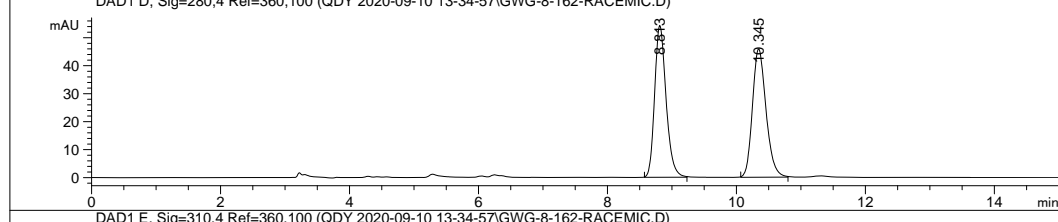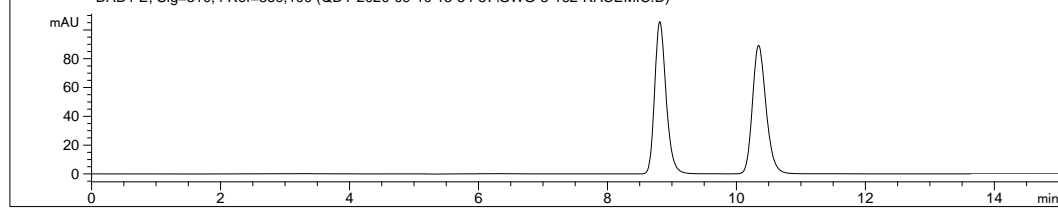

```

=====
                          Area Percent Report
=====
Sorted By      :      Signal
Multiplier    :      1.0000
Dilution      :      1.0000
Use Multiplier & Dilution Factor with ISTDs
    
```

Signal 1: DAD1 A, Sig=210,4 Ref=360,100  
Signal 2: DAD1 B, Sig=230,4 Ref=360,100

| Peak # | RetTime [min] | Type | Width [min] | Area [mAU*s] | Height [mAU] | Area %  |
|--------|---------------|------|-------------|--------------|--------------|---------|
| 1      | 8.813         | BB   | 0.1897      | 6456.85742   | 524.21906    | 49.8921 |
| 2      | 10.345        | BB   | 0.2269      | 6484.79004   | 442.80795    | 50.1079 |

Totals : 1.29416e4 967.02701

Signal 3: DAD1 C, Sig=254,4 Ref=360,100

| Peak # | RetTime [min] | Type | Width [min] | Area [mAU*s] | Height [mAU] | Area %  |
|--------|---------------|------|-------------|--------------|--------------|---------|
| 1      | 8.813         | BB   | 0.1903      | 3872.62427   | 313.17105    | 49.8569 |
| 2      | 10.345        | BB   | 0.2274      | 3894.86011   | 265.06952    | 50.1431 |

Totals : 7767.48438 578.24057

Signal 4: DAD1 D, Sig=280,4 Ref=360,100

| Peak # | RetTime [min] | Type | Width [min] | Area [mAU*s] | Height [mAU] | Area %  |
|--------|---------------|------|-------------|--------------|--------------|---------|
| 1      | 8.813         | BB   | 0.1895      | 667.67902    | 54.30044     | 49.9036 |
| 2      | 10.345        | BB   | 0.2245      | 670.25879    | 45.86591     | 50.0964 |

Totals : 1337.93781 100.16636

Signal 5: DAD1 E, Sig=310,4 Ref=360,100

\*\*\* End of Report \*\*\*

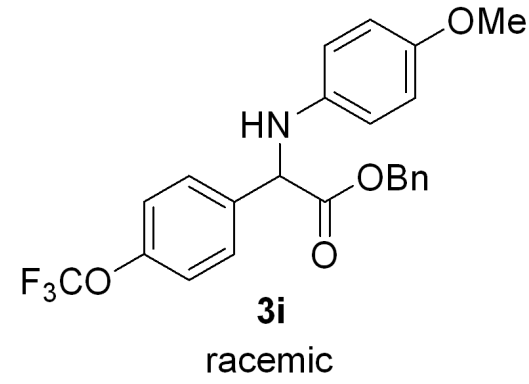

```

=====
Acq. Operator   :                               Seq. Line :    7
Acq. Instrument : Instrument 1                   Location  : Vial 55
Injection Date  : 9/10/2020 3:48:13 PM          Inj       :    1
                                                Inj Volume: 5.000 µl
Different Inj Volume from Sequence ! Actual Inj Volume : 3.000 µl
Acq. Method    : C:\CHEM32\1\DATA\QDY 2020-09-10 13-34-57\IC-05-30.M
Last changed   : 8/23/2012 1:59:23 PM
Analysis Method: C:\CHEM32\1\METHODS\IC-10-10.M
Last changed   : 9/10/2020 4:21:01 PM
                (modified after loading)
    
```

Additional Info : Peak(s) manually integrated

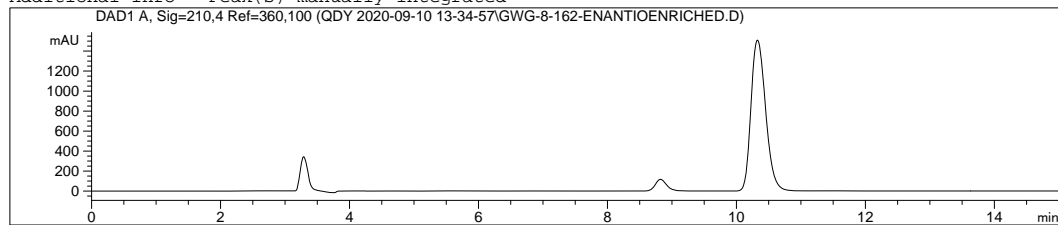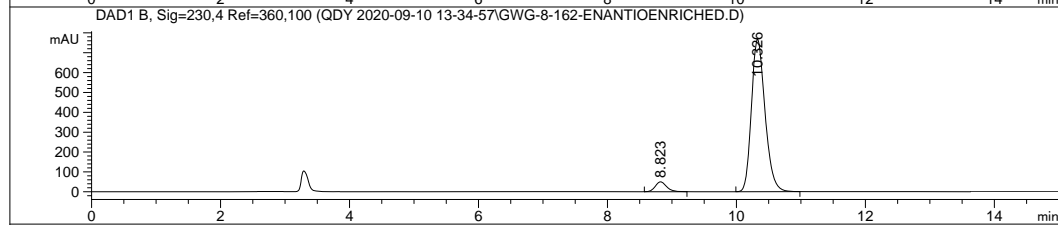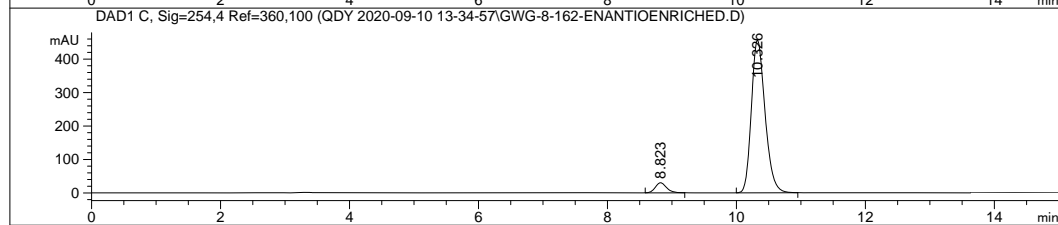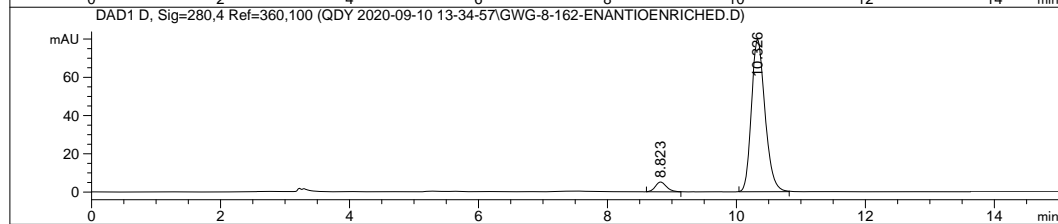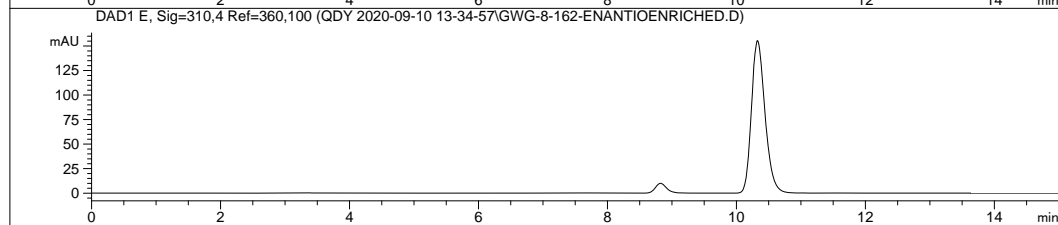

Area Percent Report

```

Sorted By      : Signal
Multiplier     : 1.0000
Dilution       : 1.0000
Use Multiplier & Dilution Factor with ISTDs
    
```

Signal 1: DAD1 A, Sig=210,4 Ref=360,100

Signal 2: DAD1 B, Sig=230,4 Ref=360,100

| Peak # | RetTime [min] | Type | Width [min] | Area [mAU*s] | Height [mAU] | Area %  |
|--------|---------------|------|-------------|--------------|--------------|---------|
| 1      | 8.823         | BB   | 0.1859      | 607.03156    | 49.90976     | 5.1190  |
| 2      | 10.326        | BB   | 0.2251      | 1.12514e4    | 767.23541    | 94.8810 |

Totals : 1.18585e4 817.14517

Signal 3: DAD1 C, Sig=254,4 Ref=360,100

| Peak # | RetTime [min] | Type | Width [min] | Area [mAU*s] | Height [mAU] | Area %  |
|--------|---------------|------|-------------|--------------|--------------|---------|
| 1      | 8.823         | BB   | 0.1858      | 366.62070    | 30.16608     | 5.1726  |
| 2      | 10.326        | BB   | 0.2280      | 6721.14990   | 455.80380    | 94.8274 |

Totals : 7087.77060 485.96988

Signal 4: DAD1 D, Sig=280,4 Ref=360,100

| Peak # | RetTime [min] | Type | Width [min] | Area [mAU*s] | Height [mAU] | Area %  |
|--------|---------------|------|-------------|--------------|--------------|---------|
| 1      | 8.823         | BB   | 0.1843      | 61.78724     | 5.13759      | 5.0365  |
| 2      | 10.326        | BB   | 0.2246      | 1165.00574   | 79.65732     | 94.9635 |

Totals : 1226.79298 84.79491

Signal 5: DAD1 E, Sig=310,4 Ref=360,100

\*\*\* End of Report \*\*\*

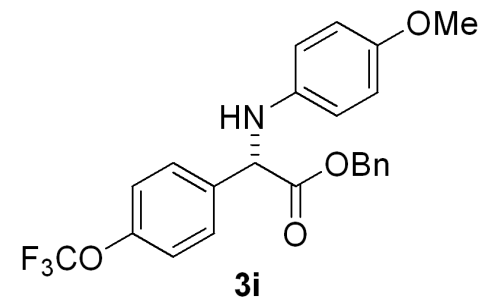

enantioenriched

Sample Name:

```

=====
Acq. Operator   :                               Seq. Line :    4
Acq. Instrument : Instrument 1                  Location  : Vial 51
Injection Date  : 9/11/2020 9:01:45 PM        Inj       :    1
                                                Inj Volume: 5.000 µl
Different Inj Volume from Sequence ! Actual Inj Volume : 3.000 µl
Acq. Method    : C:\CHEM32\1\DATA\QDY 2020-09-11 20-06-40\IC-03-40.M
Last changed   : 9/11/2020 9:00:52 PM
                (modified after loading)
Analysis Method : C:\CHEM32\1\METHODS\IC-10-10.M
Last changed   : 9/11/2020 9:43:10 PM
                (modified after loading)
Additional Info : Peak(s) manually integrated
  
```

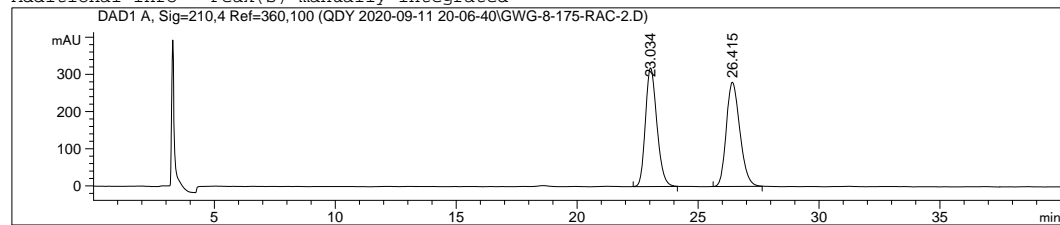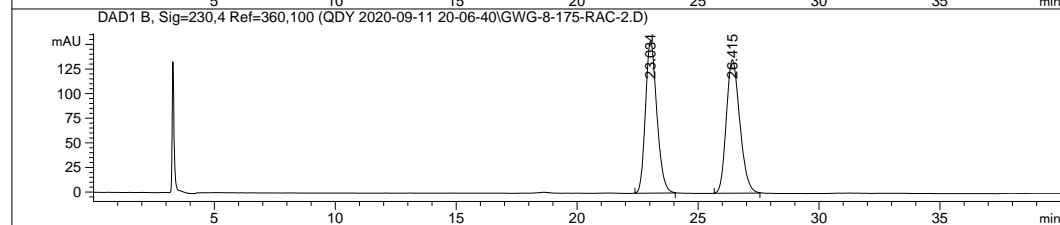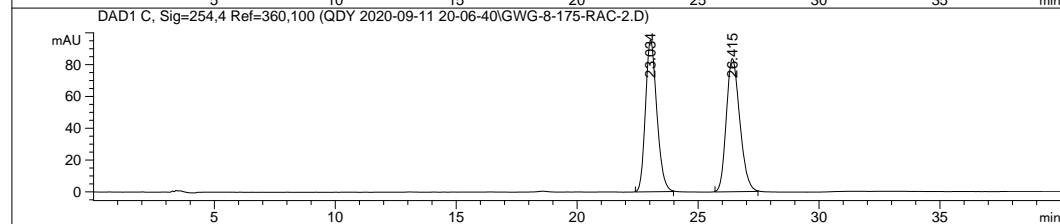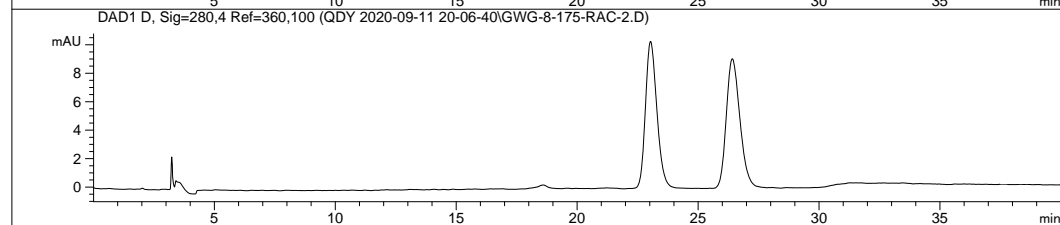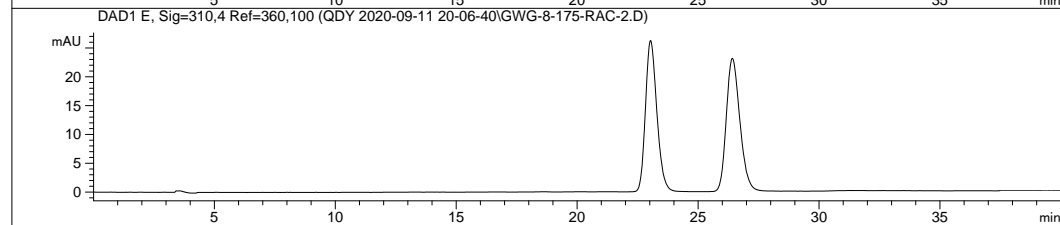

Sample Name:

```

=====
                          Area Percent Report
=====
Sorted By      :      Signal
Multiplier    :      1.0000
Dilution      :      1.0000
Use Multiplier & Dilution Factor with ISTDs
  
```

Signal 1: DAD1 A, Sig=210,4 Ref=360,100

| Peak # | RetTime [min] | Type | Width [min] | Area [mAU*s] | Height [mAU] | Area %  |
|--------|---------------|------|-------------|--------------|--------------|---------|
| 1      | 23.034        | BB   | 0.5101      | 1.05082e4    | 319.15567    | 49.0075 |
| 2      | 26.415        | BB   | 0.6049      | 1.09338e4    | 280.40665    | 50.9925 |

Totals : 2.14420e4 599.56232

Signal 2: DAD1 B, Sig=230,4 Ref=360,100

| Peak # | RetTime [min] | Type | Width [min] | Area [mAU*s] | Height [mAU] | Area %  |
|--------|---------------|------|-------------|--------------|--------------|---------|
| 1      | 23.034        | BB   | 0.5031      | 5043.83984   | 154.42055    | 48.9949 |
| 2      | 26.415        | BB   | 0.5997      | 5250.78125   | 135.62695    | 51.0051 |

Totals : 1.02946e4 290.04750

Signal 3: DAD1 C, Sig=254,4 Ref=360,100

| Peak # | RetTime [min] | Type | Width [min] | Area [mAU*s] | Height [mAU] | Area %  |
|--------|---------------|------|-------------|--------------|--------------|---------|
| 1      | 23.034        | BB   | 0.5027      | 3110.99243   | 95.32832     | 49.0061 |
| 2      | 26.415        | BB   | 0.6010      | 3237.18481   | 83.73515     | 50.9939 |

Totals : 6348.17725 179.06348

Signal 4: DAD1 D, Sig=280,4 Ref=360,100

Signal 5: DAD1 E, Sig=310,4 Ref=360,100

\*\*\* End of Report \*\*\*

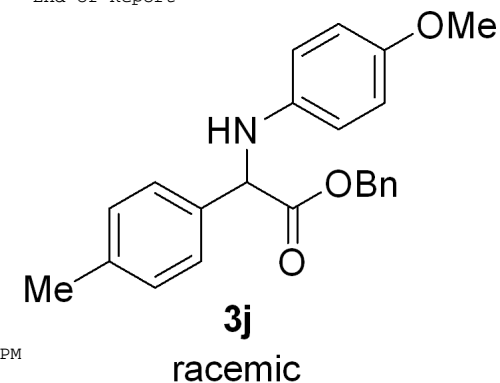

```

=====
Acq. Operator   :                               Seq. Line :    3
Acq. Instrument : Instrument 1                   Location  : Vial 52
Injection Date  : 9/12/2020 8:07:39 PM          Inj       :    1
                                                Inj Volume: 5.000 µl
Different Inj Volume from Sequence ! Actual Inj Volume : 3.000 µl
Acq. Method     : C:\CHEM32\1\DATA\QDY 2020-09-12 19-13-43\IC-03-40.M
Last changed    : 9/12/2020 8:06:47 PM          (modified after loading)
Analysis Method  : C:\CHEM32\1\METHODS\IC-10-10.M
Last changed    : 9/12/2020 7:52:02 PM          (modified after loading)
Additional Info  : Peak(s) manually integrated
  
```

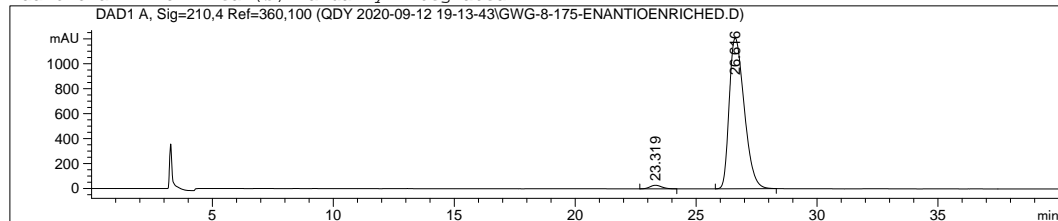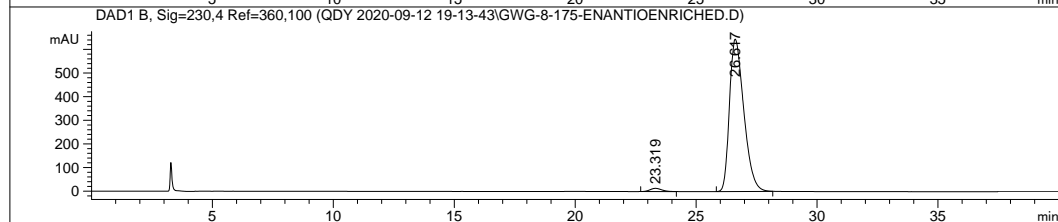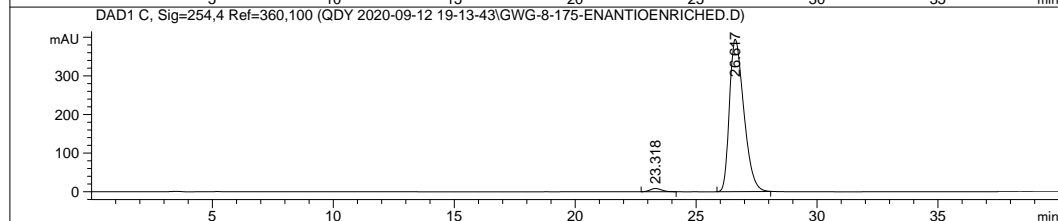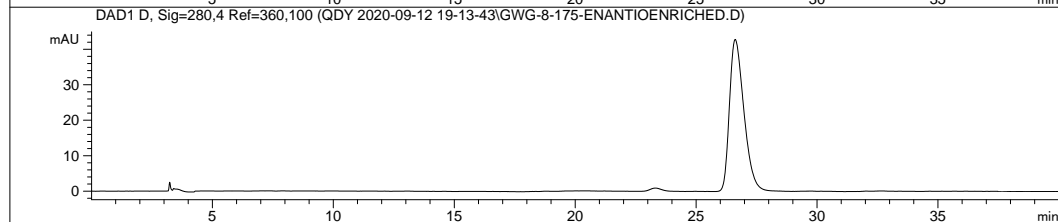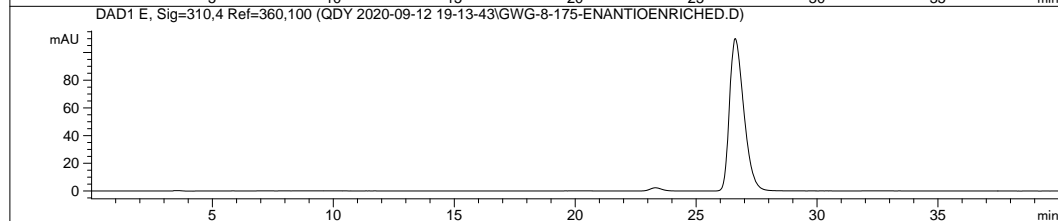

```

=====
                          Area Percent Report
=====
Sorted By      :      Signal
Multiplier     :      1.0000
Dilution      :      1.0000
Use Multiplier & Dilution Factor with ISTDs
  
```

Signal 1: DAD1 A, Sig=210,4 Ref=360,100

| Peak # | RetTime [min] | Type | Width [min] | Area [mAU*s] | Height [mAU] | Area %  |
|--------|---------------|------|-------------|--------------|--------------|---------|
| 1      | 23.319        | BB   | 0.5196      | 963.31384    | 28.55461     | 1.8198  |
| 2      | 26.616        | BB   | 0.6737      | 5.19721e4    | 1208.55933   | 98.1802 |

Totals : 5.29354e4 1237.11394

Signal 2: DAD1 B, Sig=230,4 Ref=360,100

| Peak # | RetTime [min] | Type | Width [min] | Area [mAU*s] | Height [mAU] | Area %  |
|--------|---------------|------|-------------|--------------|--------------|---------|
| 1      | 23.319        | BB   | 0.5188      | 455.05374    | 13.58382     | 1.6854  |
| 2      | 26.617        | BB   | 0.6362      | 2.65446e4    | 644.86804    | 98.3146 |

Totals : 2.69997e4 658.45186

Signal 3: DAD1 C, Sig=254,4 Ref=360,100

| Peak # | RetTime [min] | Type | Width [min] | Area [mAU*s] | Height [mAU] | Area %  |
|--------|---------------|------|-------------|--------------|--------------|---------|
| 1      | 23.318        | BB   | 0.5175      | 280.17941    | 8.39287      | 1.6906  |
| 2      | 26.617        | BB   | 0.6377      | 1.62922e4    | 394.61450    | 98.3094 |

Totals : 1.65724e4 403.00738

Signal 4: DAD1 D, Sig=280,4 Ref=360,100

Signal 5: DAD1 E, Sig=310,4 Ref=360,100

\*\*\* End of Report \*\*\*

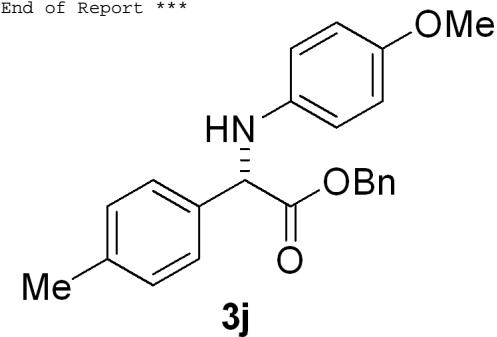

```

=====
Acq. Operator   :                               Seq. Line :    2
Acq. Instrument : Instrument 1                   Location  : Vial 51
Injection Date  : 10/9/2020 9:36:11 PM          Inj       :    1
                                                Inj Volume: 5.000 µl
Different Inj Volume from Sequence ! Actual Inj Volume : 3.000 µl
Acq. Method    : C:\CHEM32\1\DATA\QDY 2020-10-09 21-23-20\IC-15-30.M
Last changed   : 10/9/2020 9:50:35 PM          (modified after loading)
Analysis Method: C:\CHEM32\1\METHODS\IC-10-10.M
Last changed   : 10/9/2020 10:08:16 PM        (modified after loading)
Additional Info : Peak(s) manually integrated
  
```

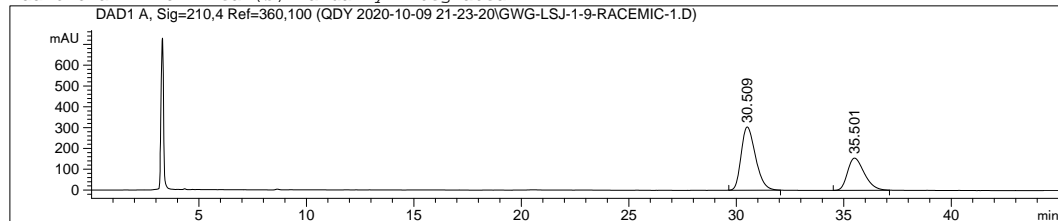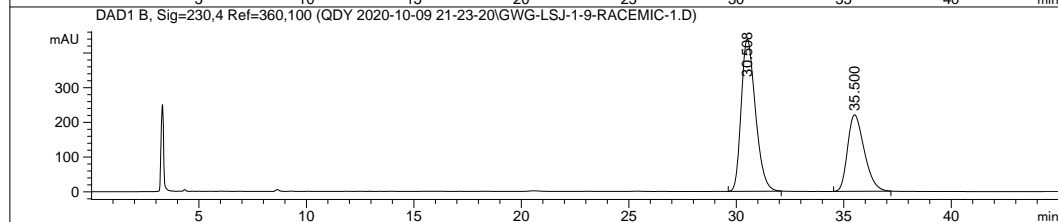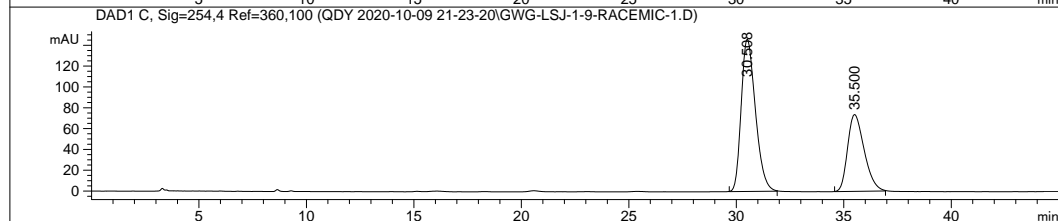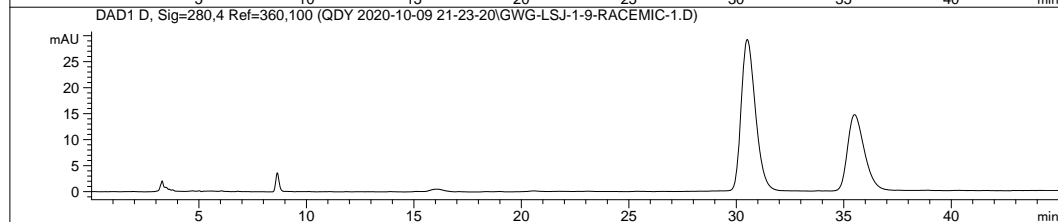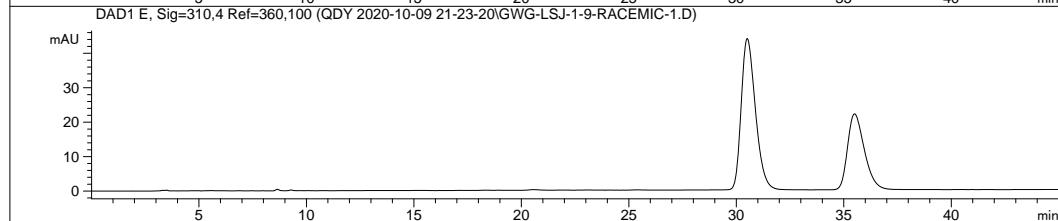

```

=====
                          Area Percent Report
=====
Sorted By      :      Signal
Multiplier     :      1.0000
Dilution      :      1.0000
Use Multiplier & Dilution Factor with ISTDs
  
```

Signal 1: DAD1 A, Sig=210,4 Ref=360,100

| Peak # | RetTime [min] | Type | Width [min] | Area [mAU*s] | Height [mAU] | Area %  |
|--------|---------------|------|-------------|--------------|--------------|---------|
| 1      | 30.509        | BB   | 0.7126      | 1.40856e4    | 303.95694    | 62.6945 |
| 2      | 35.501        | BB   | 0.8352      | 8381.48047   | 154.90536    | 37.3055 |

Totals : 2.24671e4 458.86230

Signal 2: DAD1 B, Sig=230,4 Ref=360,100

| Peak # | RetTime [min] | Type | Width [min] | Area [mAU*s] | Height [mAU] | Area %  |
|--------|---------------|------|-------------|--------------|--------------|---------|
| 1      | 30.508        | BB   | 0.7123      | 2.01542e4    | 438.43222    | 62.8464 |
| 2      | 35.500        | BB   | 0.8356      | 1.19148e4    | 220.79034    | 37.1536 |

Totals : 3.20690e4 659.22256

Signal 3: DAD1 C, Sig=254,4 Ref=360,100

| Peak # | RetTime [min] | Type | Width [min] | Area [mAU*s] | Height [mAU] | Area %  |
|--------|---------------|------|-------------|--------------|--------------|---------|
| 1      | 30.508        | BB   | 0.7103      | 6718.23730   | 146.13780    | 62.9290 |
| 2      | 35.500        | BB   | 0.8280      | 3957.65527   | 73.76090     | 37.0710 |

Totals : 1.06759e4 219.89870

Signal 4: DAD1 D, Sig=280,4 Ref=360,100

Signal 5: DAD1 E, Sig=310,4 Ref=360,100

\*\*\* End of Report \*\*\*

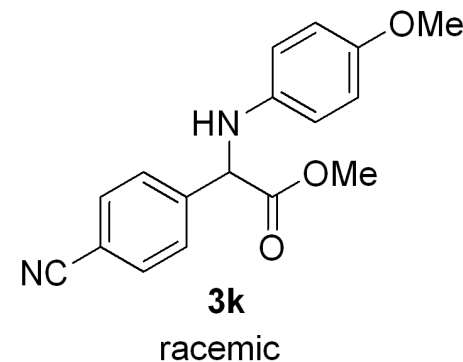

```

=====
Acq. Operator   :                               Seq. Line :    3
Acq. Instrument : Instrument 1                   Location  : Vial 52
Injection Date  : 10/9/2020 10:22:13 PM         Inj       :    1
                                                Inj Volume: 5.000 µl
Different Inj Volume from Sequence ! Actual Inj Volume : 3.000 µl
Acq. Method    : C:\CHEM32\1\DATA\QDY 2020-10-09 21-23-20\IC-15-30.M
Last changed   : 10/9/2020 9:50:35 PM
                (modified after loading)
Analysis Method: C:\CHEM32\1\METHODS\IC-10-10.M
Last changed   : 10/9/2020 10:08:16 PM
                (modified after loading)
Additional Info : Peak(s) manually integrated
  
```

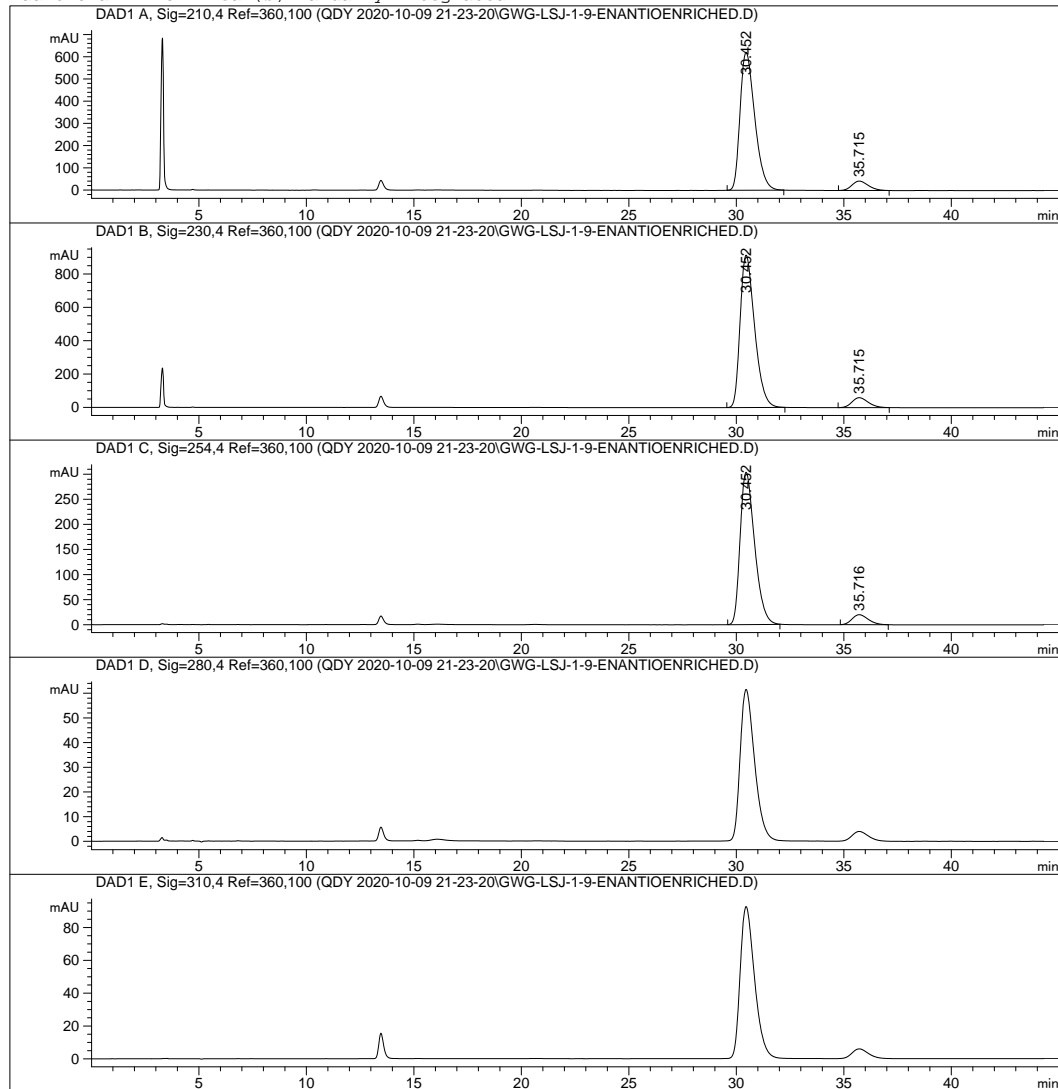

```

=====
                          Area Percent Report
=====
Sorted By      :      Signal
Multiplier    :      1.0000
Dilution      :      1.0000
Use Multiplier & Dilution Factor with ISTDs
  
```

Signal 1: DAD1 A, Sig=210,4 Ref=360,100

| Peak #   | RetTime [min] | Type | Width [min] | Area [mAU*s] | Height [mAU] | Area %  |
|----------|---------------|------|-------------|--------------|--------------|---------|
| 1        | 30.452        | BB   | 0.7355      | 2.94765e4    | 621.35602    | 92.9196 |
| 2        | 35.715        | BB   | 0.7598      | 2246.07397   | 42.41673     | 7.0804  |
| Totals : |               |      |             | 3.17226e4    | 663.77274    |         |

Signal 2: DAD1 B, Sig=230,4 Ref=360,100

| Peak #   | RetTime [min] | Type | Width [min] | Area [mAU*s] | Height [mAU] | Area %  |
|----------|---------------|------|-------------|--------------|--------------|---------|
| 1        | 30.452        | BB   | 0.7220      | 4.27786e4    | 914.09973    | 93.1369 |
| 2        | 35.715        | BB   | 0.8187      | 3152.27661   | 59.63350     | 6.8631  |
| Totals : |               |      |             | 4.59308e4    | 973.73323    |         |

Signal 3: DAD1 C, Sig=254,4 Ref=360,100

| Peak #   | RetTime [min] | Type | Width [min] | Area [mAU*s] | Height [mAU] | Area %  |
|----------|---------------|------|-------------|--------------|--------------|---------|
| 1        | 30.452        | BB   | 0.7242      | 1.42124e4    | 303.59375    | 93.1402 |
| 2        | 35.716        | BB   | 0.8042      | 1046.75024   | 19.94781     | 6.8598  |
| Totals : |               |      |             | 1.52591e4    | 323.54156    |         |

Signal 4: DAD1 D, Sig=280,4 Ref=360,100

Signal 5: DAD1 E, Sig=310,4 Ref=360,100

\*\*\* End of Report \*\*\*

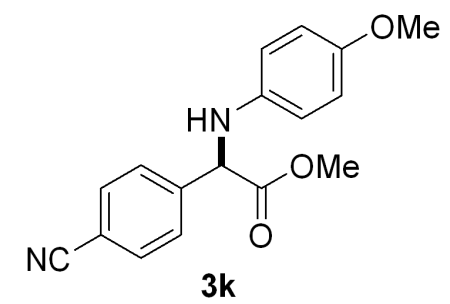

enantioenriched



```

=====
Acq. Operator   :                               Seq. Line :    5
Acq. Instrument : Instrument 1                   Location  : Vial 51
Injection Date  : 10/9/2020 11:19:23 PM        Inj       :    1
                                                Inj Volume: 5.000 µl
Different Inj Volume from Sequence ! Actual Inj Volume : 3.000 µl
Acq. Method    : C:\CHEM32\1\DATA\QDY 2020-10-09 21-23-20\IC-10-30.M
Last changed   : 10/9/2020 11:50:30 PM
                (modified after loading)
Analysis Method: C:\CHEM32\1\METHODS\IC-10-10.M
Last changed   : 10/9/2020 10:08:16 PM
                (modified after loading)
Additional Info : Peak(s) manually integrated
    
```

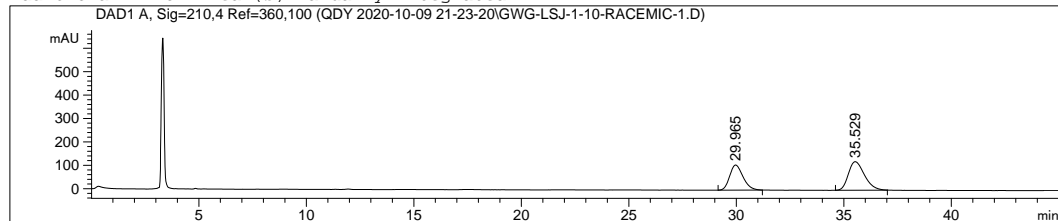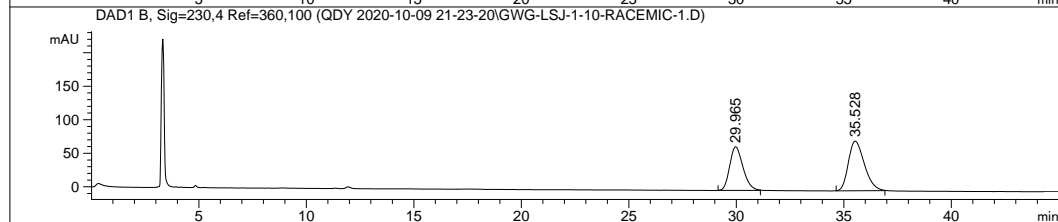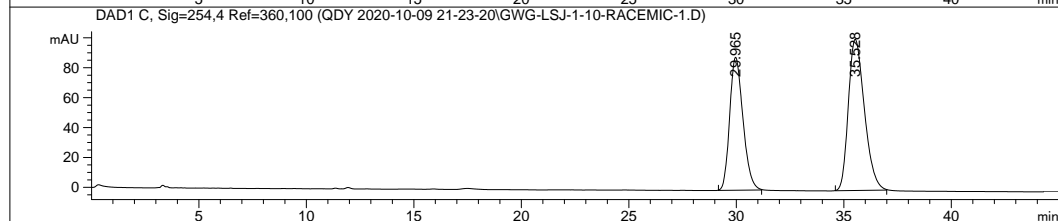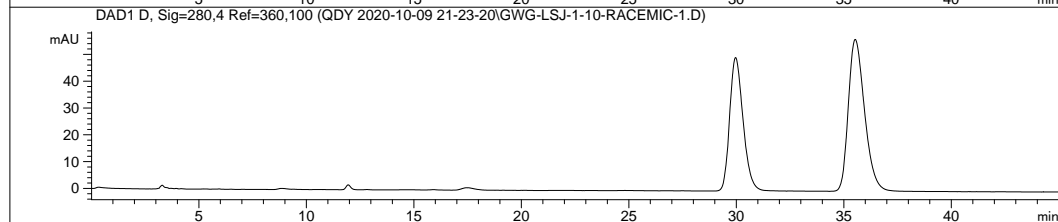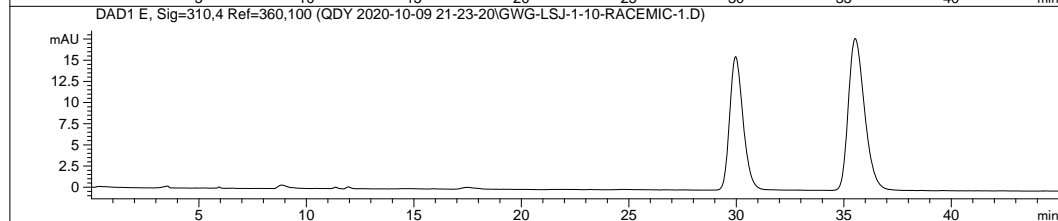

```

=====
                          Area Percent Report
=====
Sorted By      :      Signal
Multiplier     :      1.0000
Dilution      :      1.0000
Use Multiplier & Dilution Factor with ISTDs
    
```

Signal 1: DAD1 A, Sig=210,4 Ref=360,100

| Peak # | RetTime [min] | Type | Width [min] | Area [mAU*s] | Height [mAU] | Area %  |
|--------|---------------|------|-------------|--------------|--------------|---------|
| 1      | 29.965        | BB   | 0.6703      | 4622.48877   | 107.36497    | 42.1413 |
| 2      | 35.529        | BB   | 0.7984      | 6346.52246   | 122.10793    | 57.8587 |

Totals : 1.09690e4 229.47291

Signal 2: DAD1 B, Sig=230,4 Ref=360,100

| Peak # | RetTime [min] | Type | Width [min] | Area [mAU*s] | Height [mAU] | Area %  |
|--------|---------------|------|-------------|--------------|--------------|---------|
| 1      | 29.965        | BB   | 0.6624      | 2790.62842   | 65.06458     | 42.1905 |
| 2      | 35.528        | BB   | 0.7991      | 3823.73145   | 73.97218     | 57.8095 |

Totals : 6614.35986 139.03676

Signal 3: DAD1 C, Sig=254,4 Ref=360,100

| Peak # | RetTime [min] | Type | Width [min] | Area [mAU*s] | Height [mAU] | Area %  |
|--------|---------------|------|-------------|--------------|--------------|---------|
| 1      | 29.965        | BB   | 0.6651      | 3817.77197   | 88.89240     | 42.1397 |
| 2      | 35.528        | BB   | 0.8029      | 5242.02881   | 101.11050    | 57.8603 |

Totals : 9059.80078 190.00290

Signal 4: DAD1 D, Sig=280,4 Ref=360,100

Signal 5: DAD1 E, Sig=310,4 Ref=360,100

\*\*\* End of Report \*\*\*

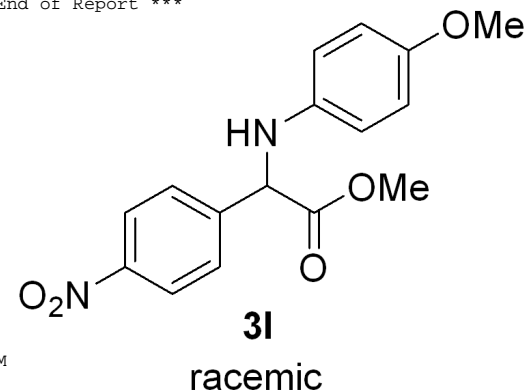

```

=====
Acq. Operator   :                               Seq. Line :    6
Acq. Instrument : Instrument 1                   Location  : Vial 52
Injection Date  : 10/10/2020 12:05:22 AM        Inj       :    1
                                                Inj Volume: 5.000 µl
Different Inj Volume from Sequence ! Actual Inj Volume : 3.000 µl
Acq. Method    : C:\CHEM32\1\DATA\QDY 2020-10-09 21-23-20\IC-10-30.M
Last changed   : 10/9/2020 11:50:30 PM
                (modified after loading)
Analysis Method: C:\CHEM32\1\METHODS\IC-10-10.M
Last changed   : 10/9/2020 10:08:16 PM
                (modified after loading)
Additional Info : Peak(s) manually integrated
    
```

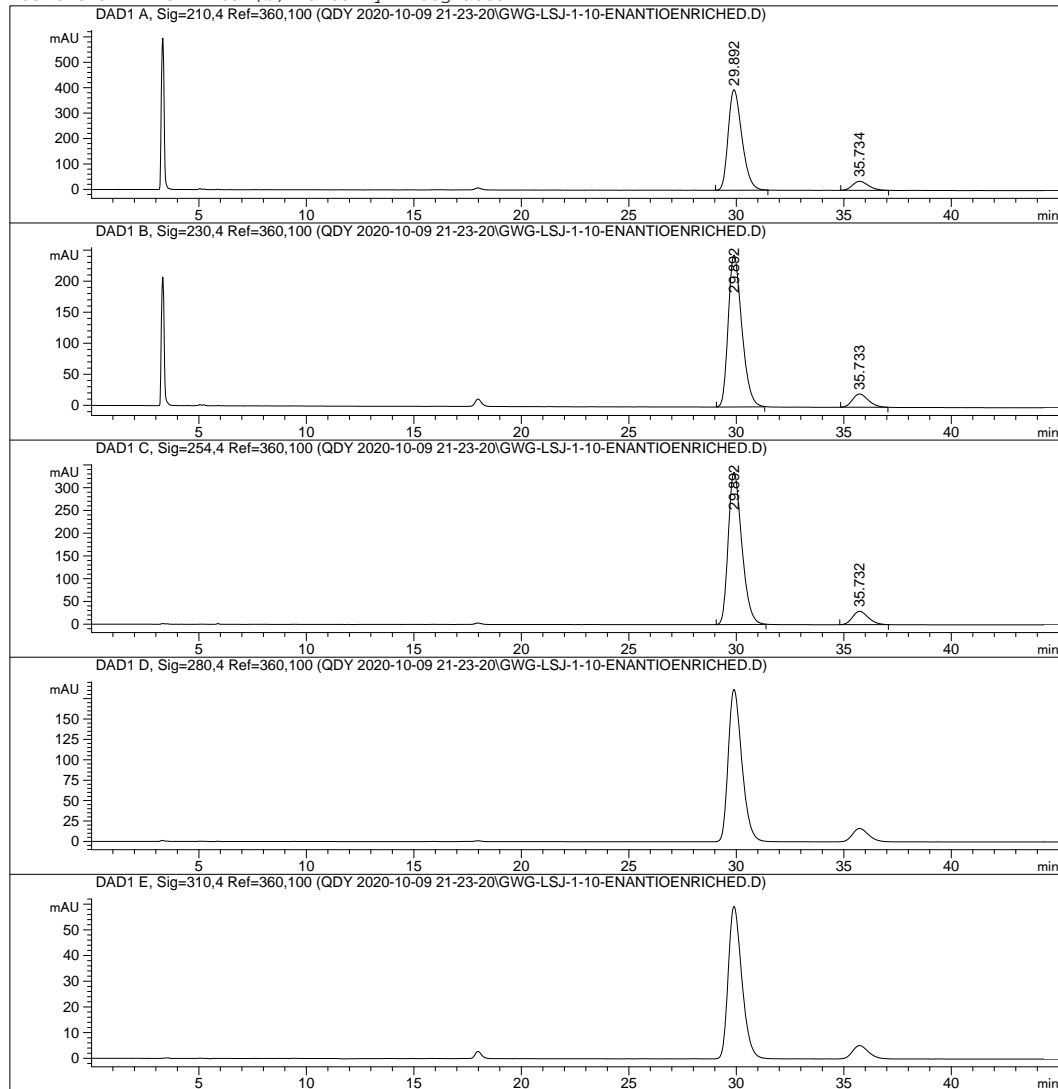

```

=====
                          Area Percent Report
=====
Sorted By      :      Signal
Multiplier    :      1.0000
Dilution      :      1.0000
Use Multiplier & Dilution Factor with ISTDs
    
```

Signal 1: DAD1 A, Sig=210,4 Ref=360,100

| Peak # | RetTime [min] | Type | Width [min] | Area [mAU*s] | Height [mAU] | Area %  |
|--------|---------------|------|-------------|--------------|--------------|---------|
| 1      | 29.892        | BB   | 0.6833      | 1.75279e4    | 395.32166    | 90.5202 |
| 2      | 35.734        | BB   | 0.7714      | 1835.62036   | 35.49043     | 9.4798  |

Totals : 1.93635e4 430.81208

Signal 2: DAD1 B, Sig=230,4 Ref=360,100

| Peak # | RetTime [min] | Type | Width [min] | Area [mAU*s] | Height [mAU] | Area %  |
|--------|---------------|------|-------------|--------------|--------------|---------|
| 1      | 29.892        | BB   | 0.6775      | 1.07185e4    | 244.47308    | 90.7105 |
| 2      | 35.733        | BB   | 0.7793      | 1097.66614   | 21.36965     | 9.2895  |

Totals : 1.18162e4 265.84273

Signal 3: DAD1 C, Sig=254,4 Ref=360,100

| Peak # | RetTime [min] | Type | Width [min] | Area [mAU*s] | Height [mAU] | Area %  |
|--------|---------------|------|-------------|--------------|--------------|---------|
| 1      | 29.892        | BB   | 0.6774      | 1.46665e4    | 334.57648    | 90.6924 |
| 2      | 35.732        | BB   | 0.7988      | 1505.20349   | 29.22900     | 9.3076  |

Totals : 1.61717e4 363.80548

Signal 4: DAD1 D, Sig=280,4 Ref=360,100

Signal 5: DAD1 E, Sig=310,4 Ref=360,100

\*\*\* End of Report \*\*\*

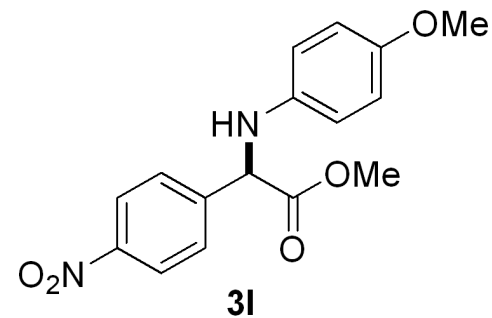

enantioenriched

```

=====
Acq. Operator   :                               Seq. Line :    2
Acq. Instrument : Instrument 1                   Location  : Vial 51
Injection Date  : 10/10/2020 8:29:11 PM        Inj       :    1
                                                Inj Volume: 5.000 µl
Different Inj Volume from Sequence ! Actual Inj Volume : 3.000 µl
Acq. Method    : C:\CHEM32\1\DATA\QDY 2020-10-10 20-16-25\IC-10-30.M
Last changed   : 10/10/2020 8:49:01 PM
                (modified after loading)
Analysis Method: C:\CHEM32\1\METHODS\IC-10-10.M
Last changed   : 10/9/2020 10:08:16 PM
                (modified after loading)
Additional Info : Peak(s) manually integrated
  
```

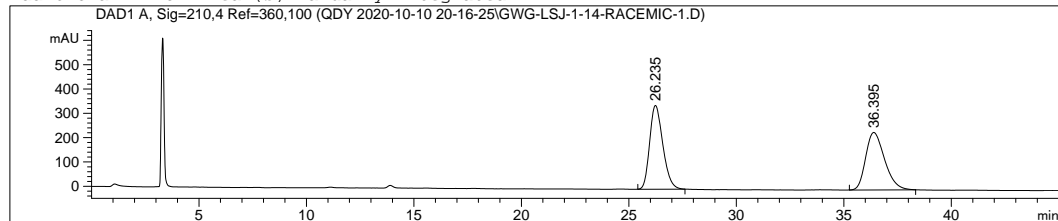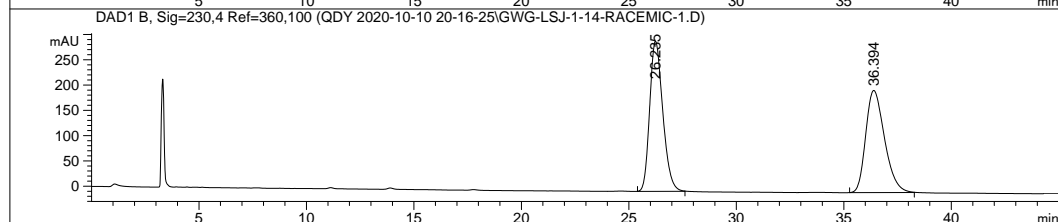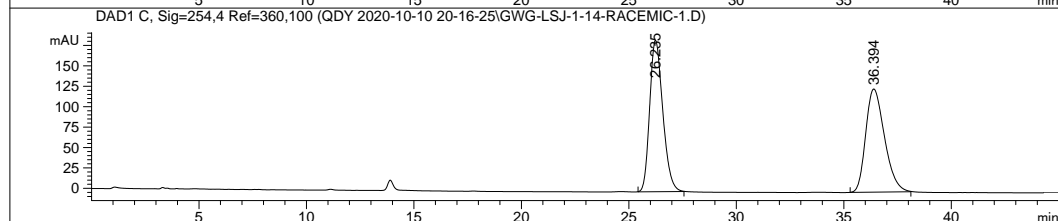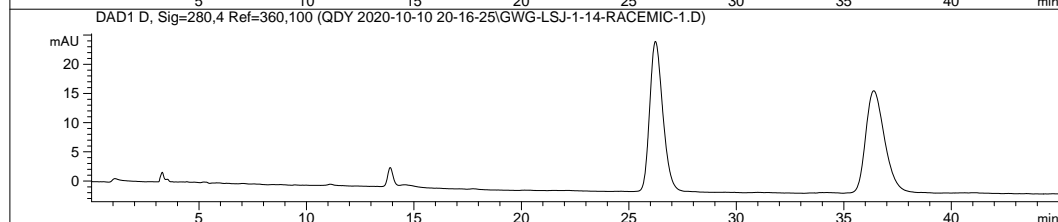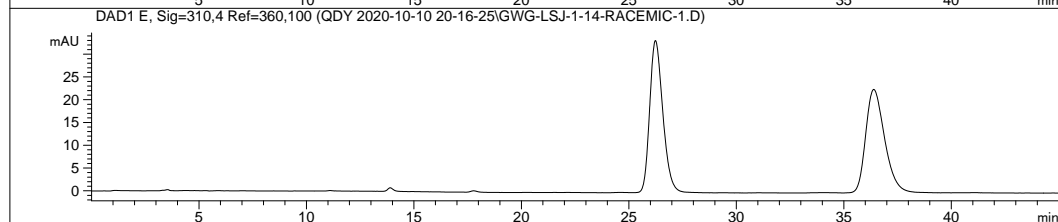

```

=====
                          Area Percent Report
=====
Sorted By      :      Signal
Multiplier    :      1.0000
Dilution      :      1.0000
Use Multiplier & Dilution Factor with ISTDs
  
```

Signal 1: DAD1 A, Sig=210,4 Ref=360,100

| Peak # | RetTime [min] | Type | Width [min] | Area [mAU*s] | Height [mAU] | Area %  |
|--------|---------------|------|-------------|--------------|--------------|---------|
| 1      | 26.235        | BB   | 0.6574      | 1.46934e4    | 344.61758    | 50.3839 |
| 2      | 36.395        | BB   | 0.9519      | 1.44695e4    | 236.45473    | 49.6161 |

Totals : 2.91629e4 581.07231

Signal 2: DAD1 B, Sig=230,4 Ref=360,100

| Peak # | RetTime [min] | Type | Width [min] | Area [mAU*s] | Height [mAU] | Area %  |
|--------|---------------|------|-------------|--------------|--------------|---------|
| 1      | 26.235        | BB   | 0.6495      | 1.25605e4    | 296.95313    | 50.5709 |
| 2      | 36.394        | BB   | 0.9409      | 1.22769e4    | 202.03667    | 49.4291 |

Totals : 2.48373e4 498.98979

Signal 3: DAD1 C, Sig=254,4 Ref=360,100

| Peak # | RetTime [min] | Type | Width [min] | Area [mAU*s] | Height [mAU] | Area %  |
|--------|---------------|------|-------------|--------------|--------------|---------|
| 1      | 26.235        | BB   | 0.6525      | 7864.40771   | 185.52826    | 50.6459 |
| 2      | 36.394        | BB   | 0.9434      | 7663.81836   | 126.38996    | 49.3541 |

Totals : 1.55282e4 311.91822

Signal 4: DAD1 D, Sig=280,4 Ref=360,100

Signal 5: DAD1 E, Sig=310,4 Ref=360,100

\*\*\* End of Report \*\*\*

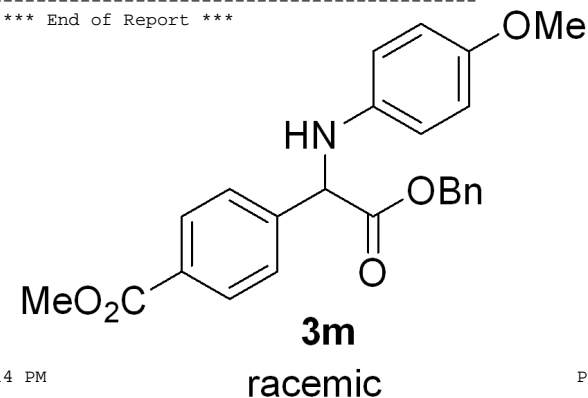

```

=====
Acq. Operator   :                               Seq. Line :    3
Acq. Instrument : Instrument 1                   Location  : Vial 52
Injection Date  : 10/10/2020 9:15:11 PM         Inj       :    1
                                                Inj Volume: 5.000 µl
Different Inj Volume from Sequence ! Actual Inj Volume : 3.000 µl
Acq. Method    : C:\CHEM32\1\DATA\QDY 2020-10-10 20-16-25\IC-10-30.M
Last changed   : 10/10/2020 8:49:01 PM
                (modified after loading)
Analysis Method: C:\CHEM32\1\METHODS\IC-10-10.M
Last changed   : 10/9/2020 10:08:16 PM
                (modified after loading)
Additional Info : Peak(s) manually integrated
    
```

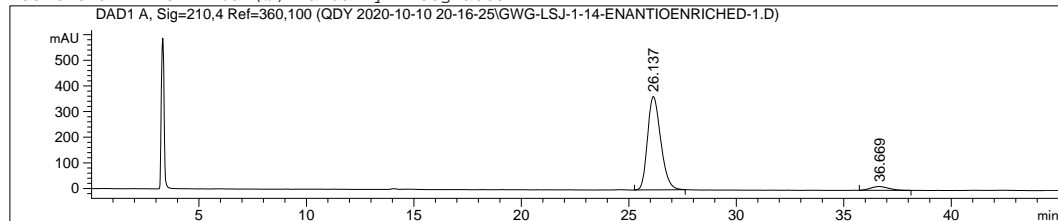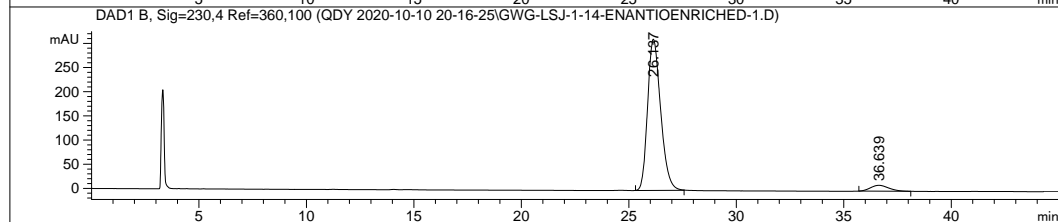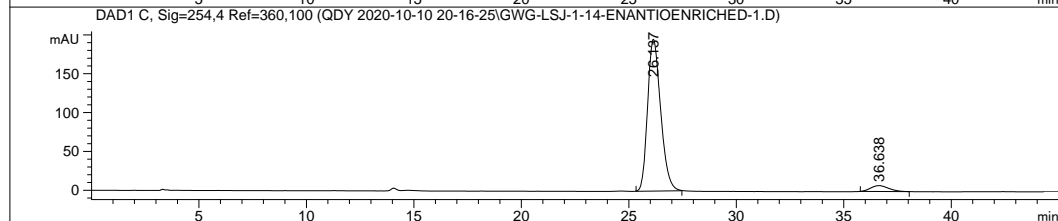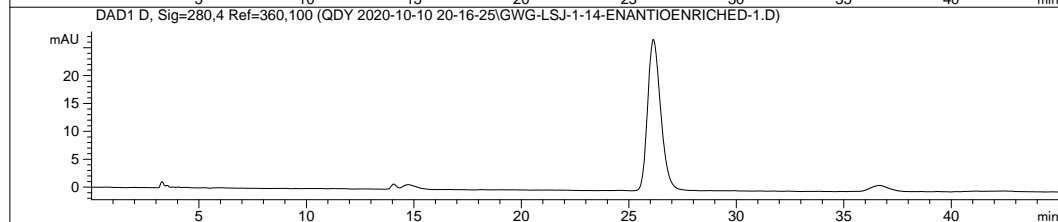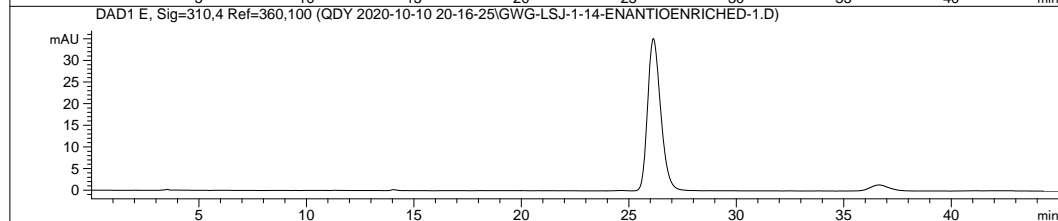

```

=====
                          Area Percent Report
=====
Sorted By      :      Signal
Multiplier    :      1.0000
Dilution      :      1.0000
Use Multiplier & Dilution Factor with ISTDs
    
```

Signal 1: DAD1 A, Sig=210,4 Ref=360,100

| Peak # | RetTime [min] | Type | Width [min] | Area [mAU*s] | Height [mAU] | Area %  |
|--------|---------------|------|-------------|--------------|--------------|---------|
| 1      | 26.137        | BB   | 0.6620      | 1.55421e4    | 364.10287    | 94.8230 |
| 2      | 36.669        | BB   | 0.7045      | 848.54608    | 14.54840     | 5.1770  |

Totals : 1.63907e4 378.65128

Signal 2: DAD1 B, Sig=230,4 Ref=360,100

| Peak # | RetTime [min] | Type | Width [min] | Area [mAU*s] | Height [mAU] | Area %  |
|--------|---------------|------|-------------|--------------|--------------|---------|
| 1      | 26.137        | BB   | 0.6529      | 1.32207e4    | 312.94702    | 94.8432 |
| 2      | 36.639        | BB   | 0.8618      | 718.83026    | 12.15848     | 5.1568  |

Totals : 1.39395e4 325.10550

Signal 3: DAD1 C, Sig=254,4 Ref=360,100

| Peak # | RetTime [min] | Type | Width [min] | Area [mAU*s] | Height [mAU] | Area %  |
|--------|---------------|------|-------------|--------------|--------------|---------|
| 1      | 26.137        | BB   | 0.6535      | 8266.79688   | 195.41634    | 94.9221 |
| 2      | 36.638        | BB   | 0.8704      | 442.23718    | 7.58240      | 5.0779  |

Totals : 8709.03406 202.99873

Signal 4: DAD1 D, Sig=280,4 Ref=360,100

Signal 5: DAD1 E, Sig=310,4 Ref=360,100

\*\*\* End of Report \*\*\*

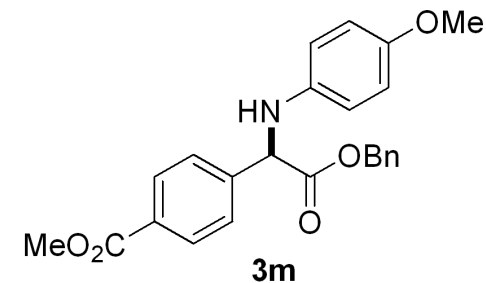

```

=====
Acq. Operator   :                               Seq. Line : 12
Acq. Instrument : Instrument 1                   Location  : Vial 56
Injection Date  : 9/15/2020 8:03:28 PM          Inj       : 1
                                                Inj Volume: 5.000 µl
Different Inj Volume from Sequence ! Actual Inj Volume : 3.000 µl
Acq. Method    : C:\CHEM32\1\DATA\QDY 2020-09-15 15-29-52\OD-20-40.M
Last changed   : 9/15/2020 7:21:33 PM          (modified after loading)
Analysis Method: C:\CHEM32\1\METHODS\IC-10-10.M
Last changed   : 9/12/2020 7:52:02 PM          (modified after loading)
Additional Info: Peak(s) manually integrated
    
```

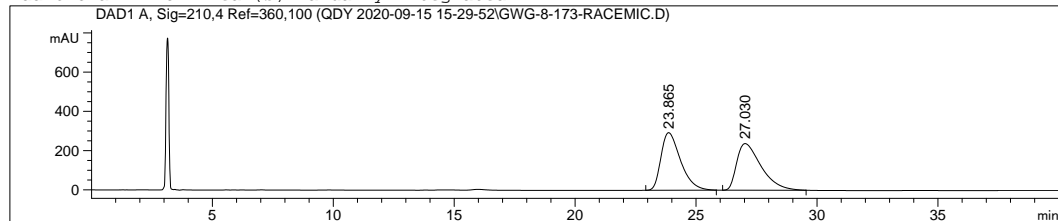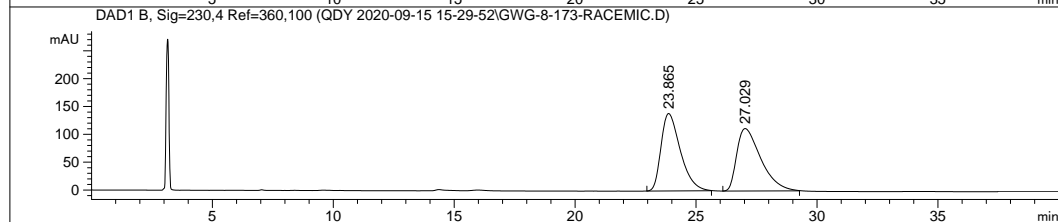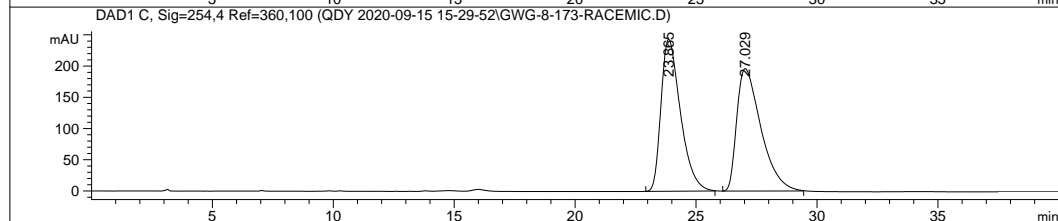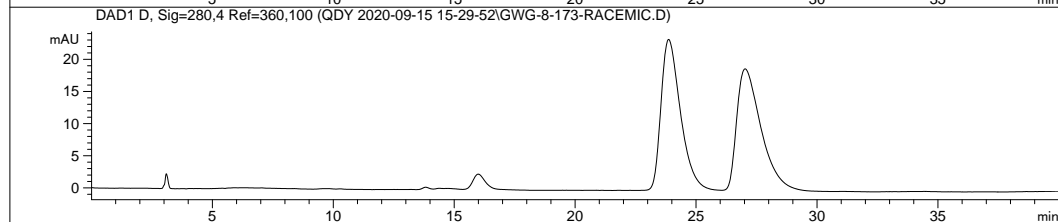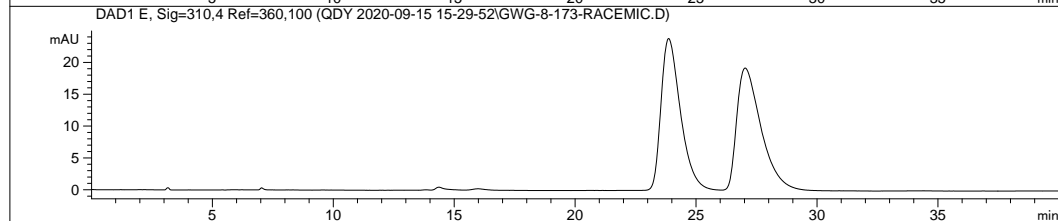

```

=====
                          Area Percent Report
=====
Sorted By      :      Signal
Multiplier     :      1.0000
Dilution       :      1.0000
Use Multiplier & Dilution Factor with ISTDs
    
```

Signal 1: DAD1 A, Sig=210,4 Ref=360,100

| Peak # | RetTime [min] | Type | Width [min] | Area [mAU*s] | Height [mAU] | Area %  |
|--------|---------------|------|-------------|--------------|--------------|---------|
| 1      | 23.865        | BB   | 0.8552      | 1.65367e4    | 293.55722    | 49.8188 |
| 2      | 27.030        | BB   | 1.0437      | 1.66570e4    | 237.66818    | 50.1812 |

Totals : 3.31936e4 531.22540

Signal 2: DAD1 B, Sig=230,4 Ref=360,100

| Peak # | RetTime [min] | Type | Width [min] | Area [mAU*s] | Height [mAU] | Area %  |
|--------|---------------|------|-------------|--------------|--------------|---------|
| 1      | 23.865        | BB   | 0.8537      | 7743.70996   | 139.05214    | 49.9894 |
| 2      | 27.029        | BB   | 1.0506      | 7746.98291   | 112.05037    | 50.0106 |

Totals : 1.54907e4 251.10251

Signal 3: DAD1 C, Sig=254,4 Ref=360,100

| Peak # | RetTime [min] | Type | Width [min] | Area [mAU*s] | Height [mAU] | Area %  |
|--------|---------------|------|-------------|--------------|--------------|---------|
| 1      | 23.865        | BB   | 0.8559      | 1.35976e4    | 243.35191    | 50.0078 |
| 2      | 27.029        | BB   | 1.0617      | 1.35934e4    | 195.86734    | 49.9922 |

Totals : 2.71910e4 439.21925

Signal 4: DAD1 D, Sig=280,4 Ref=360,100

Signal 5: DAD1 E, Sig=310,4 Ref=360,100

\*\*\* End of Report \*\*\*

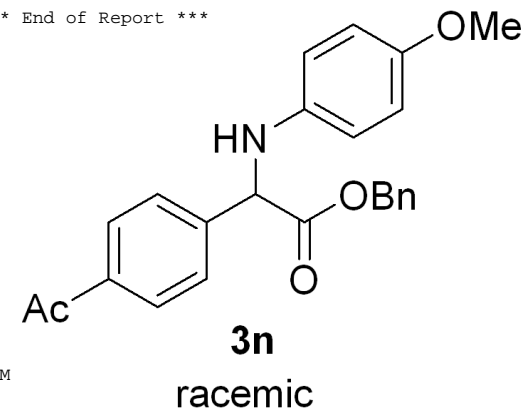

Sample Name:

```

=====
Acq. Operator   :                               Seq. Line : 11
Acq. Instrument : Instrument 1                   Location  : Vial 55
Injection Date  : 9/15/2020 7:22:25 PM          Inj       : 1
                                                    Inj Volume: 5.000 µl
Different Inj Volume from Sequence ! Actual Inj Volume : 3.000 µl
Acq. Method    : C:\CHEM32\1\DATA\QDY 2020-09-15 15-29-52\OD-20-40.M
Last changed   : 9/15/2020 7:21:33 PM          (modified after loading)
Analysis Method: C:\CHEM32\1\METHODS\IC-10-10.M
Last changed   : 9/12/2020 7:52:02 PM          (modified after loading)
Additional Info : Peak(s) manually integrated
  
```

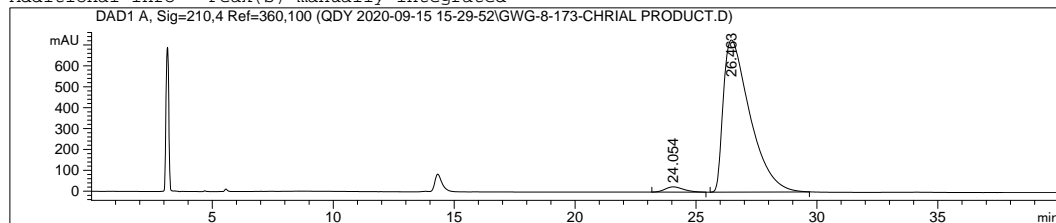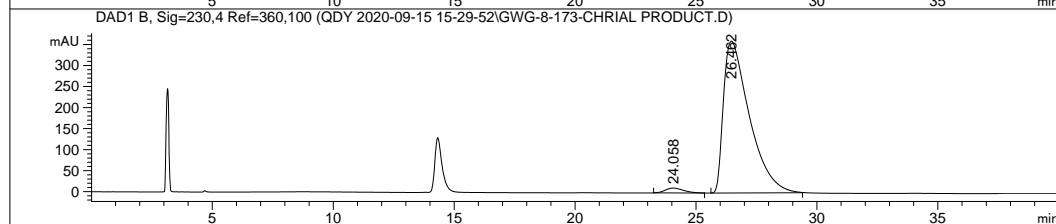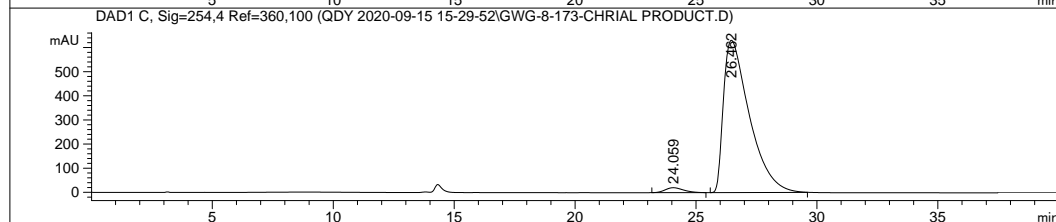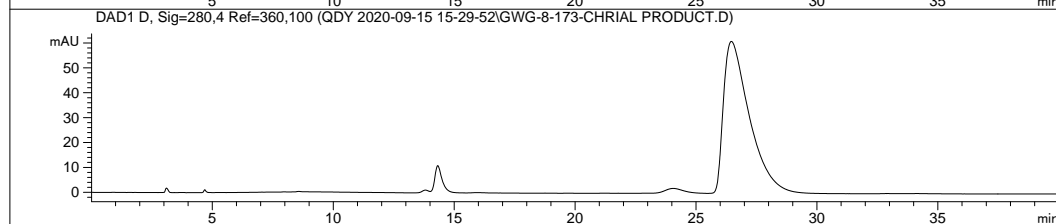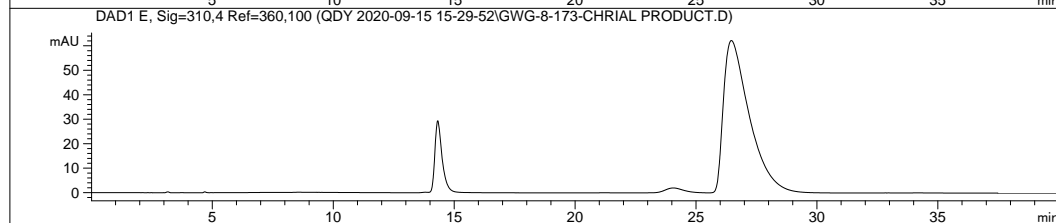

Sample Name:

```

=====
                          Area Percent Report
=====
Sorted By      :      Signal
Multiplier     :      1.0000
Dilution       :      1.0000
Use Multiplier & Dilution Factor with ISTDs
  
```

Signal 1: DAD1 A, Sig=210,4 Ref=360,100

| Peak # | RetTime [min] | Type | Width [min] | Area [mAU*s] | Height [mAU] | Area %  |
|--------|---------------|------|-------------|--------------|--------------|---------|
| 1      | 24.054        | BB   | 0.7862      | 1315.75586   | 24.99308     | 2.3119  |
| 2      | 26.463        | BB   | 1.1313      | 5.55967e4    | 727.73792    | 97.6881 |

Totals : 5.69124e4 752.73100

Signal 2: DAD1 B, Sig=230,4 Ref=360,100

| Peak # | RetTime [min] | Type | Width [min] | Area [mAU*s] | Height [mAU] | Area %  |
|--------|---------------|------|-------------|--------------|--------------|---------|
| 1      | 24.058        | BB   | 0.7867      | 608.32654    | 11.62053     | 2.2166  |
| 2      | 26.462        | BB   | 1.1215      | 2.68358e4    | 360.91928    | 97.7834 |

Totals : 2.74441e4 372.53981

Signal 3: DAD1 C, Sig=254,4 Ref=360,100

| Peak # | RetTime [min] | Type | Width [min] | Area [mAU*s] | Height [mAU] | Area %  |
|--------|---------------|------|-------------|--------------|--------------|---------|
| 1      | 24.059        | BB   | 0.8143      | 1084.67859   | 20.53423     | 2.2556  |
| 2      | 26.462        | BB   | 1.1250      | 4.70045e4    | 631.02130    | 97.7444 |

Totals : 4.80891e4 651.55553

Signal 4: DAD1 D, Sig=280,4 Ref=360,100

Signal 5: DAD1 E, Sig=310,4 Ref=360,100

\*\*\* End of Report \*\*\*

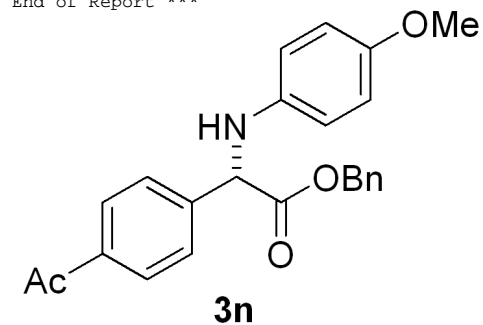

enantioenriched

```

=====
Acq. Operator   :                               Seq. Line :   15
Acq. Instrument : Instrument 1                   Location  : Vial 51
Injection Date  : 9/25/2020 8:28:00 PM          Inj       :    1
                                                Inj Volume: 5.000 µl
Different Inj Volume from Sequence ! Actual Inj Volume : 3.000 µl
Acq. Method    : C:\CHEM32\1\DATA\QDY 2020-09-25 15-21-10\IC-05-30.M
Last changed   : 8/23/2012 1:59:23 PM
Analysis Method: C:\CHEM32\1\METHODS\AD-02-60-04M.M
Last changed   : 9/23/2020 11:07:51 PM
                (modified after loading)
    
```

Additional Info : Peak(s) manually integrated

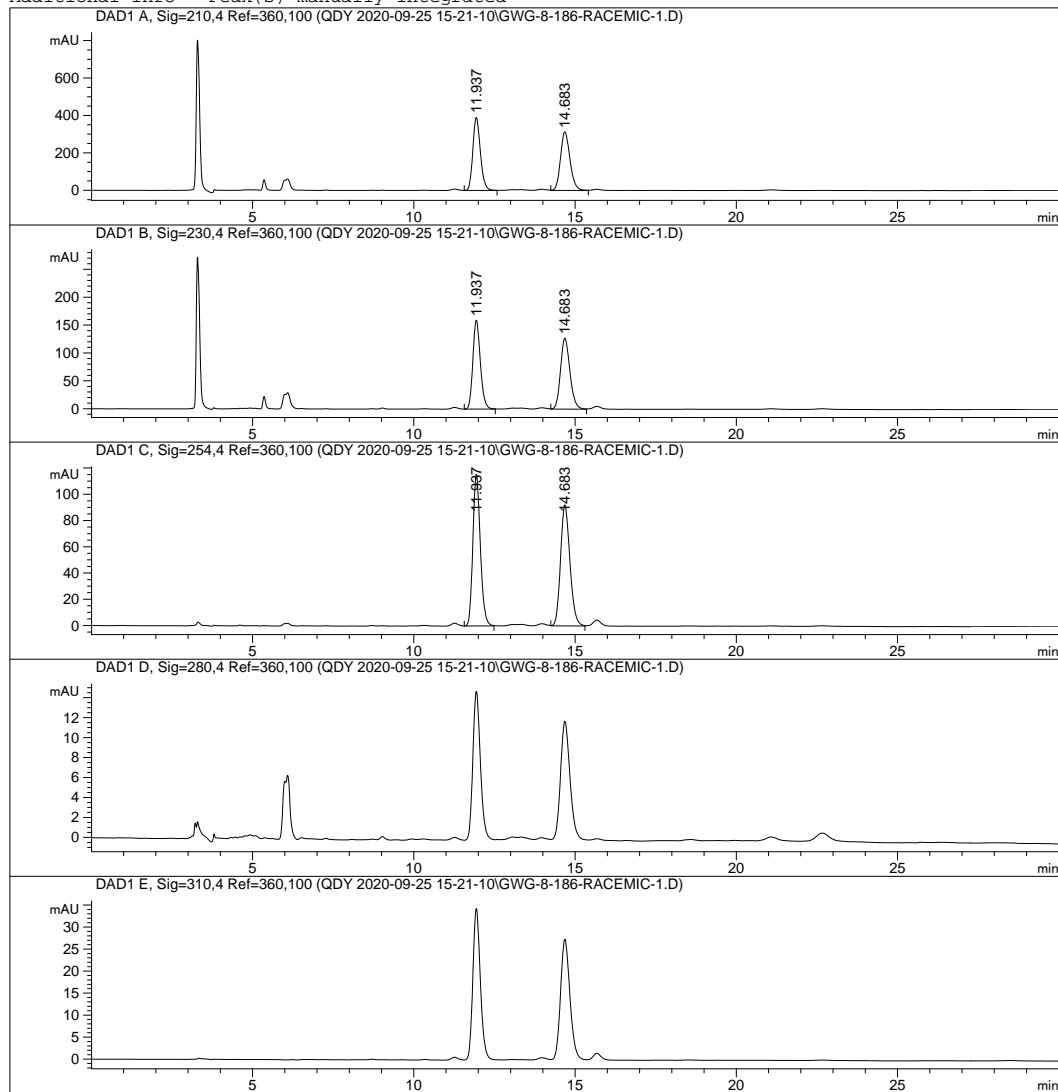

```

=====
                          Area Percent Report
=====
Sorted By      :      Signal
Multiplier     :      1.0000
Dilution       :      1.0000
Use Multiplier & Dilution Factor with ISTDs
    
```

Signal 1: DAD1 A, Sig=210,4 Ref=360,100

| Peak # | RetTime [min] | Type | Width [min] | Area [mAU*s] | Height [mAU] | Area %  |
|--------|---------------|------|-------------|--------------|--------------|---------|
| 1      | 11.937        | VB   | 0.2525      | 6367.23877   | 389.88403    | 49.8057 |
| 2      | 14.683        | VB   | 0.3171      | 6416.91943   | 313.15021    | 50.1943 |

Totals : 1.27842e4 703.03424

Signal 2: DAD1 B, Sig=230,4 Ref=360,100

| Peak # | RetTime [min] | Type | Width [min] | Area [mAU*s] | Height [mAU] | Area %  |
|--------|---------------|------|-------------|--------------|--------------|---------|
| 1      | 11.937        | VB   | 0.2481      | 2568.90527   | 159.33723    | 49.9077 |
| 2      | 14.683        | VB   | 0.3125      | 2578.40698   | 127.17684    | 50.0923 |

Totals : 5147.31226 286.51408

Signal 3: DAD1 C, Sig=254,4 Ref=360,100

| Peak # | RetTime [min] | Type | Width [min] | Area [mAU*s] | Height [mAU] | Area %  |
|--------|---------------|------|-------------|--------------|--------------|---------|
| 1      | 11.937        | VB   | 0.2481      | 1863.18982   | 115.54543    | 49.9268 |
| 2      | 14.683        | VB   | 0.3123      | 1868.65210   | 92.25445     | 50.0732 |

Totals : 3731.84192 207.79987

Signal 4: DAD1 D, Sig=280,4 Ref=360,100

Signal 5: DAD1 E, Sig=310,4 Ref=360,100

\*\*\* End of Report \*\*\*

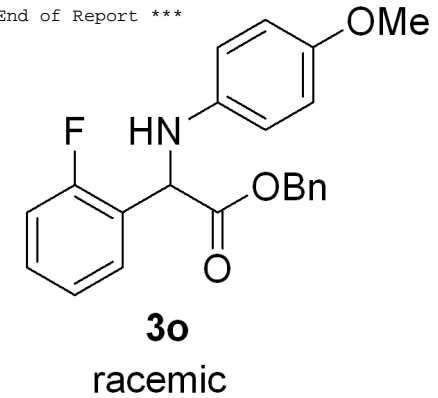

```

=====
Acq. Operator   :                               Seq. Line : 16
Acq. Instrument : Instrument 1                   Location  : Vial 52
Injection Date  : 9/25/2020 8:59:00 PM          Inj       : 1
                                                Inj Volume: 5.000 µl
Different Inj Volume from Sequence ! Actual Inj Volume : 3.000 µl
Acq. Method    : C:\CHEM32\1\DATA\QDY 2020-09-25 15-21-10\IC-05-30.M
Last changed   : 8/23/2012 1:59:23 PM
Analysis Method : C:\CHEM32\1\METHODS\OD-25-60.M
Last changed   : 9/17/2020 3:49:36 PM
Additional Info : Peak(s) manually integrated
    
```

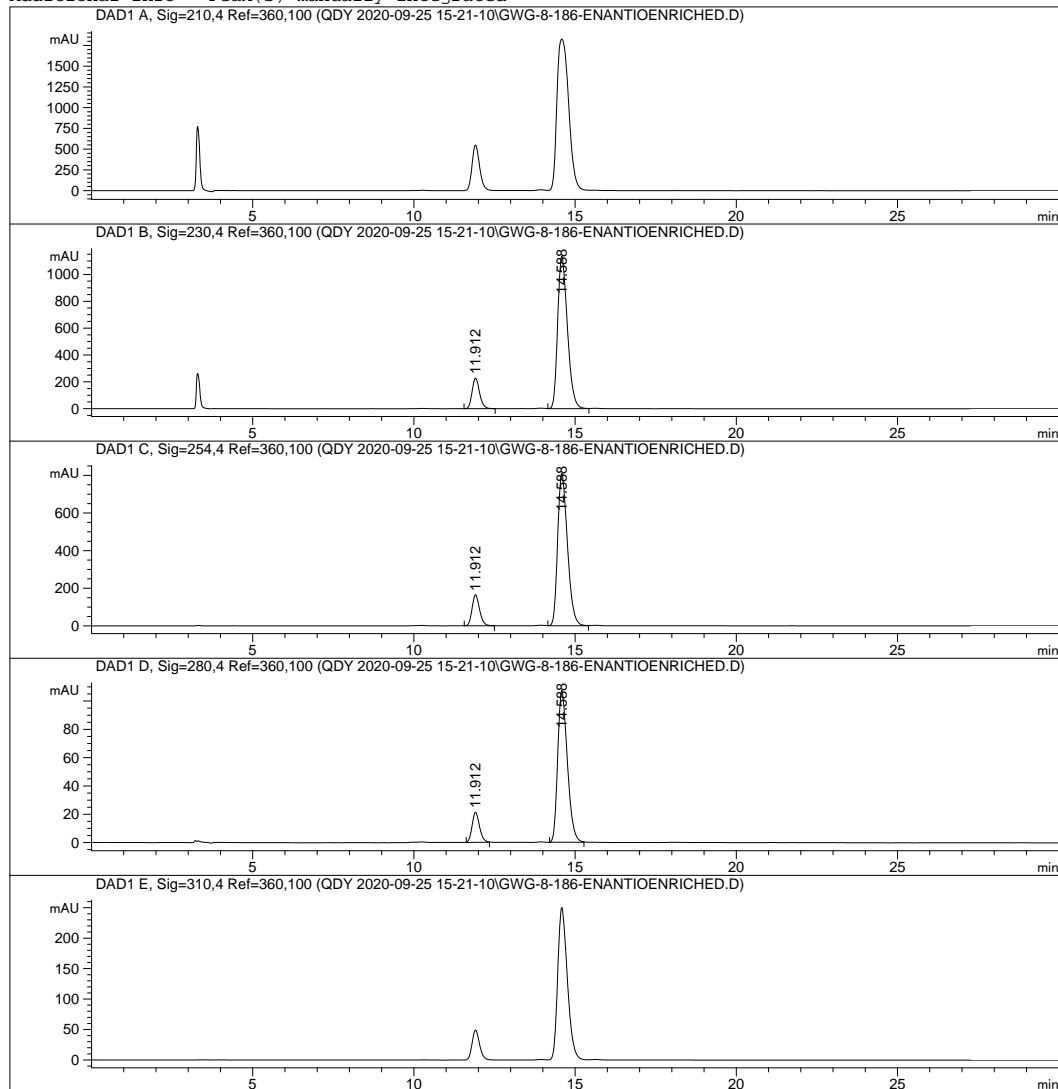

```

=====
                          Area Percent Report
=====
Sorted By      :      Signal
Multiplier    :      1.0000
Dilution      :      1.0000
Use Multiplier & Dilution Factor with ISTDs
    
```

Signal 1: DAD1 A, Sig=210,4 Ref=360,100

Signal 2: DAD1 B, Sig=230,4 Ref=360,100

| Peak # | RetTime [min] | Type | Width [min] | Area [mAU*s] | Height [mAU] | Area %  |
|--------|---------------|------|-------------|--------------|--------------|---------|
| 1      | 11.912        | BB   | 0.2486      | 3677.56104   | 227.48489    | 13.3646 |
| 2      | 14.588        | VB   | 0.3249      | 2.38396e4    | 1135.78113   | 86.6354 |

Totals : 2.75172e4 1363.26602

Signal 3: DAD1 C, Sig=254,4 Ref=360,100

| Peak # | RetTime [min] | Type | Width [min] | Area [mAU*s] | Height [mAU] | Area %  |
|--------|---------------|------|-------------|--------------|--------------|---------|
| 1      | 11.912        | BB   | 0.2488      | 2667.91016   | 164.83203    | 13.4952 |
| 2      | 14.588        | VB   | 0.3262      | 1.71014e4    | 810.53961    | 86.5048 |

Totals : 1.97693e4 975.37164

Signal 4: DAD1 D, Sig=280,4 Ref=360,100

| Peak # | RetTime [min] | Type | Width [min] | Area [mAU*s] | Height [mAU] | Area %  |
|--------|---------------|------|-------------|--------------|--------------|---------|
| 1      | 11.912        | BB   | 0.2473      | 340.40387    | 21.20450     | 13.2456 |
| 2      | 14.588        | BB   | 0.3226      | 2229.53760   | 107.22606    | 86.7544 |

Totals : 2569.94147 128.43056

Signal 5: DAD1 E, Sig=310,4 Ref=360,100

\*\*\* End of Report \*\*\*

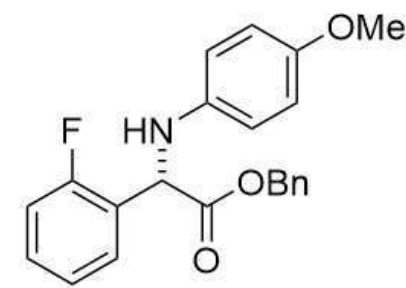

**30**  
 enantioenriched



Sample Name:

```

=====
Acq. Operator   :                               Seq. Line :    6
Acq. Instrument : Instrument 1                  Location  : Vial 54
Injection Date  : 9/6/2020 4:39:13 PM          Inj       :    1
                                                Inj Volume: 5.000 µl
Different Inj Volume from Sequence ! Actual Inj Volume : 3.000 µl
Acq. Method    : C:\CHEM32\1\DATA\QDY 2020-09-06 14-56-31\IC-05-30.M
Last changed   : 8/23/2012 1:59:23 PM
Analysis Method: C:\CHEM32\1\METHODS\IC-10-10.M
Last changed   : 9/6/2020 3:56:12 PM
                (modified after loading)
  
```

Additional Info : Peak(s) manually integrated

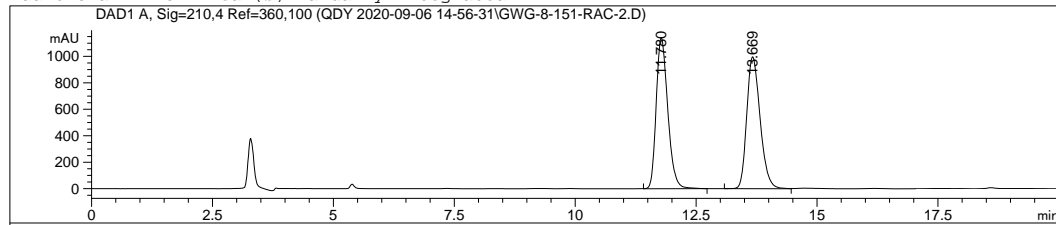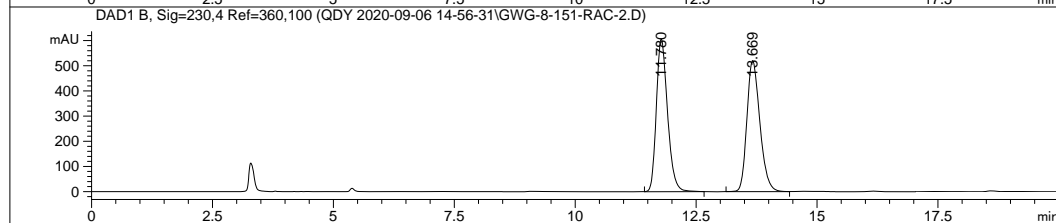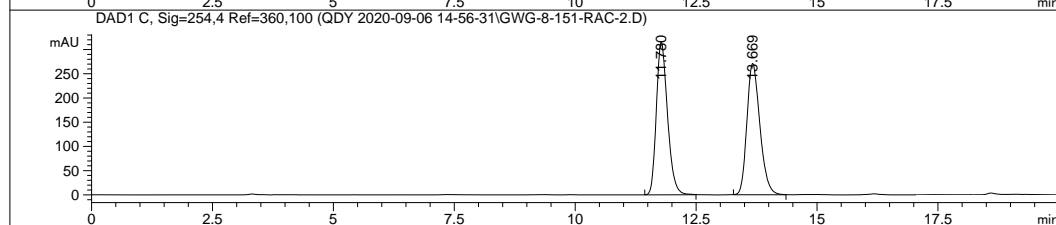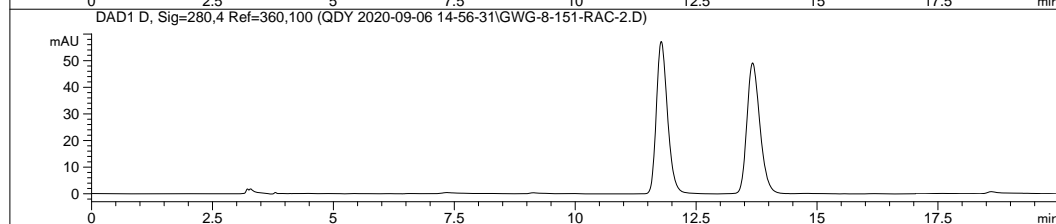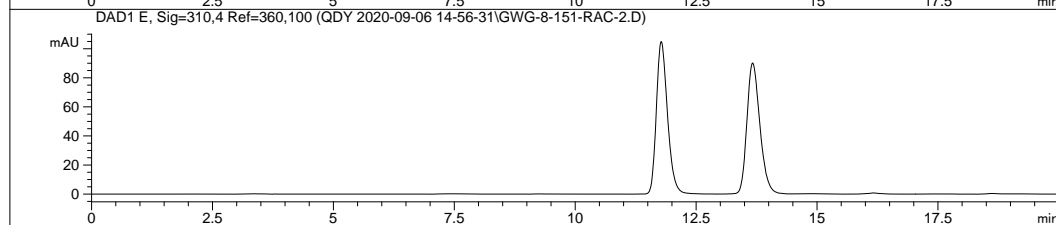

Sample Name:

```

=====
                          Area Percent Report
=====
Sorted By      :      Signal
Multiplier    :      1.0000
Dilution      :      1.0000
Use Multiplier & Dilution Factor with ISTDs
  
```

Signal 1: DAD1 A, Sig=210,4 Ref=360,100

| Peak # | RetTime [min] | Type | Width [min] | Area [mAU*s] | Height [mAU] | Area %  |
|--------|---------------|------|-------------|--------------|--------------|---------|
| 1      | 11.780        | BB   | 0.2583      | 1.89660e4    | 1138.67407   | 49.7559 |
| 2      | 13.669        | BB   | 0.2981      | 1.91521e4    | 997.25116    | 50.2441 |

Totals : 3.81181e4 2135.92523

Signal 2: DAD1 B, Sig=230,4 Ref=360,100

| Peak # | RetTime [min] | Type | Width [min] | Area [mAU*s] | Height [mAU] | Area %  |
|--------|---------------|------|-------------|--------------|--------------|---------|
| 1      | 11.780        | BB   | 0.2457      | 9747.52539   | 605.99182    | 50.0312 |
| 2      | 13.669        | BB   | 0.2880      | 9735.36914   | 520.98975    | 49.9688 |

Totals : 1.94829e4 1126.98157

Signal 3: DAD1 C, Sig=254,4 Ref=360,100

| Peak # | RetTime [min] | Type | Width [min] | Area [mAU*s] | Height [mAU] | Area %  |
|--------|---------------|------|-------------|--------------|--------------|---------|
| 1      | 11.780        | BB   | 0.2478      | 5068.40430   | 314.83176    | 50.0123 |
| 2      | 13.669        | BB   | 0.2881      | 5065.91797   | 270.99857    | 49.9877 |

Totals : 1.01343e4 585.83032

Signal 4: DAD1 D, Sig=280,4 Ref=360,100

Signal 5: DAD1 E, Sig=310,4 Ref=360,100

\*\*\* End of Report \*\*\*

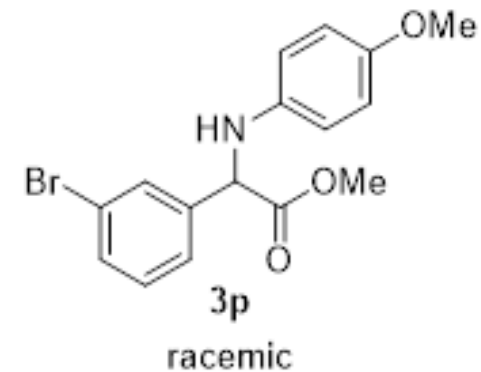

```
=====
Acq. Operator   :                               Seq. Line :    4
Acq. Instrument : Instrument 1                  Location   : Vial 55
Injection Date  : 9/6/2020 3:56:50 PM          Inj        :    1
                                                Inj Volume : 5.000 µl
Different Inj Volume from Sequence !      Actual Inj Volume : 3.000 µl
Acq. Method    : C:\CHEM32\1\DATA\QDY 2020-09-06 14-56-31\IC-05-30.M
Last changed   : 8/23/2012 1:59:23 PM
Analysis Method : C:\CHEM32\1\METHODS\IC-10-10.M
Last changed   : 9/6/2020 3:56:12 PM
                (modified after loading)
Additional Info : Peak(s) manually integrated
```

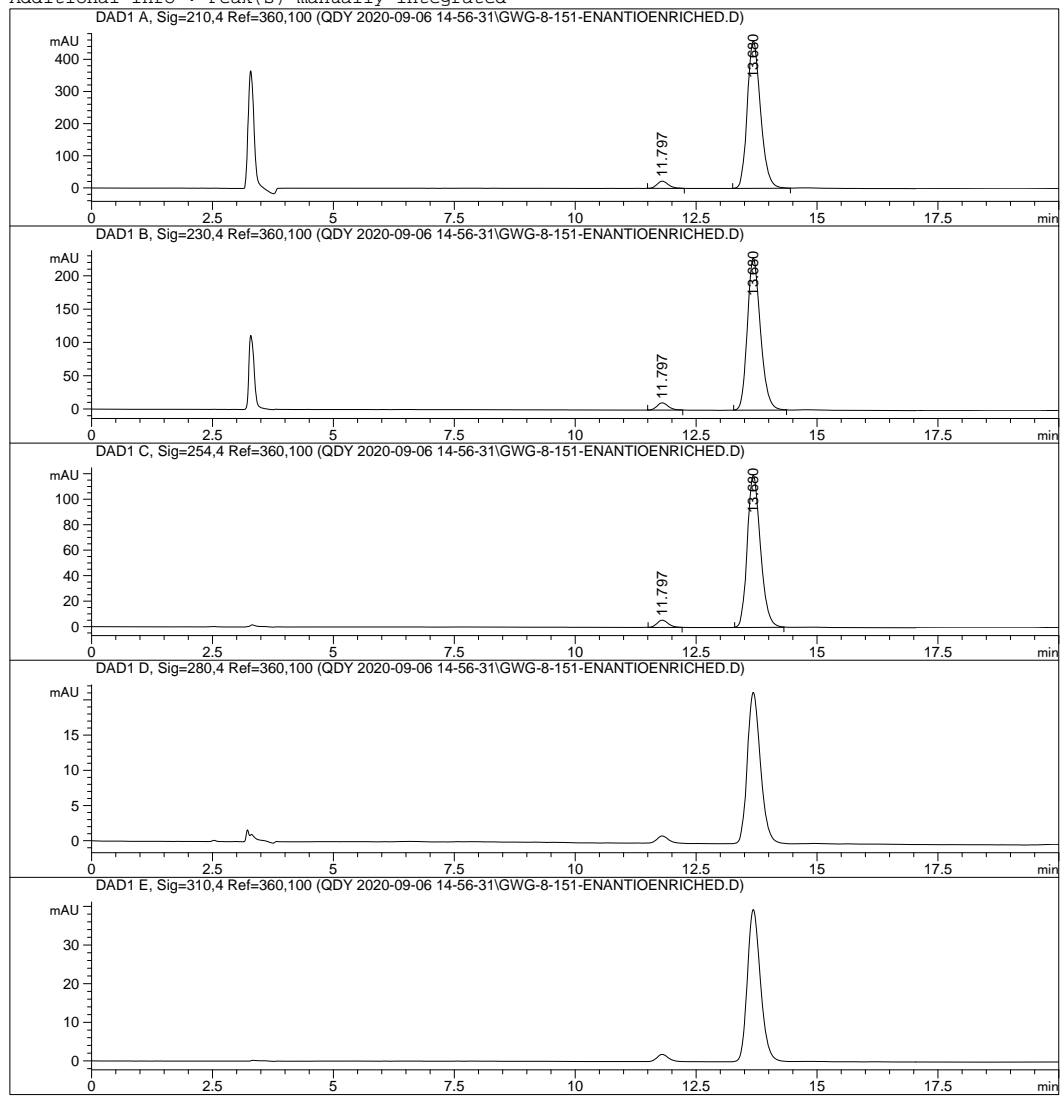

```
=====
Area Percent Report
=====
Sorted By      : Signal
Multiplier     : 1.0000
Dilution       : 1.0000
Use Multiplier & Dilution Factor with ISTDs
```

Signal 1: DAD1 A, Sig=210,4 Ref=360,100

| Peak # | RetTime [min] | Type | Width [min] | Area [mAU*s] | Height [mAU] | Area %  |
|--------|---------------|------|-------------|--------------|--------------|---------|
| 1      | 11.797        | BB   | 0.2498      | 368.12686    | 22.63284     | 4.0513  |
| 2      | 13.680        | BB   | 0.2940      | 8718.41699   | 458.25592    | 95.9487 |

Totals : 9086.54385 480.88876

Signal 2: DAD1 B, Sig=230,4 Ref=360,100

| Peak # | RetTime [min] | Type | Width [min] | Area [mAU*s] | Height [mAU] | Area %  |
|--------|---------------|------|-------------|--------------|--------------|---------|
| 1      | 11.797        | BB   | 0.2488      | 176.86041    | 10.93003     | 3.9553  |
| 2      | 13.680        | BB   | 0.2916      | 4294.61670   | 228.15088    | 96.0447 |

Totals : 4471.47711 239.08091

Signal 3: DAD1 C, Sig=254,4 Ref=360,100

| Peak # | RetTime [min] | Type | Width [min] | Area [mAU*s] | Height [mAU] | Area %  |
|--------|---------------|------|-------------|--------------|--------------|---------|
| 1      | 11.797        | BB   | 0.2466      | 92.93744     | 5.74776      | 3.9666  |
| 2      | 13.680        | BB   | 0.2918      | 2250.06421   | 119.43469    | 96.0334 |

Totals : 2343.00165 125.18245

Signal 4: DAD1 D, Sig=280,4 Ref=360,100

Signal 5: DAD1 E, Sig=310,4 Ref=360,100

\*\*\* E

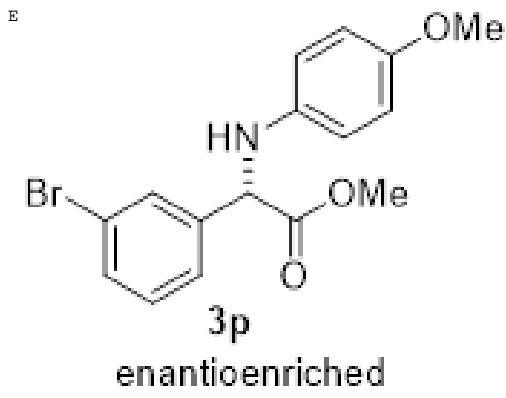

S-210

Sample Name:

```

=====
Acq. Operator   :                               Seq. Line :    2
Acq. Instrument : Instrument 1                   Location  : Vial 51
Injection Date  : 10/1/2020 8:40:46 PM          Inj       :    1
                                                Inj Volume: 5.000 µl
Different Inj Volume from Sequence ! Actual Inj Volume : 3.000 µl
Acq. Method    : C:\CHEM32\1\DATA\QDY 2020-10-01 20-27-57\IC-05-30.M
Last changed   : 10/1/2020 9:01:47 PM
                (modified after loading)
Analysis Method: C:\CHEM32\1\METHODS\IC-10-10.M
Last changed   : 6/25/2018 2:48:18 PM
Additional Info : Peak(s) manually integrated
  
```

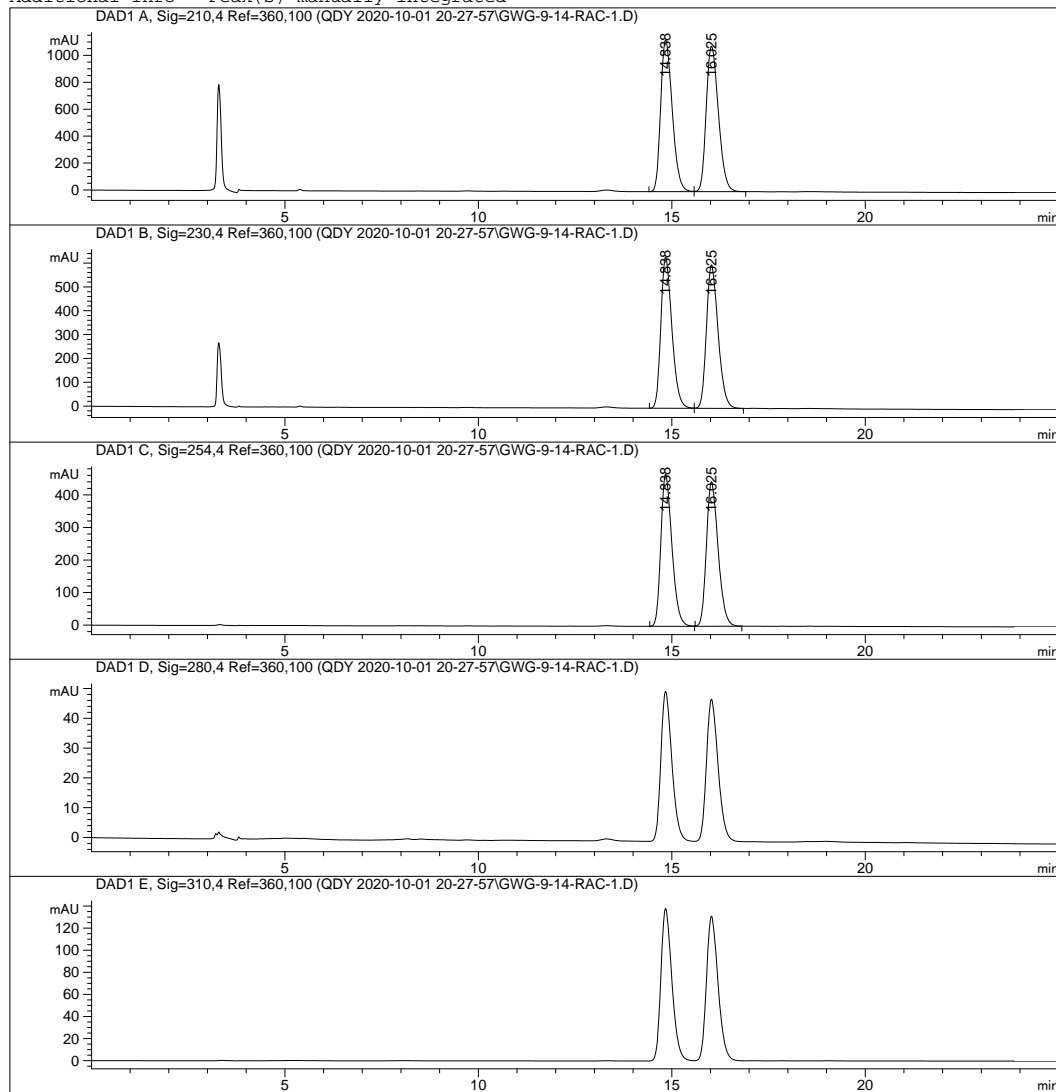

Sample Name:

```

=====
                          Area Percent Report
=====
Sorted By      :      Signal
Multiplier     :      1.0000
Dilution       :      1.0000
Use Multiplier & Dilution Factor with ISTDs
  
```

Signal 1: DAD1 A, Sig=210,4 Ref=360,100

| Peak # | RetTime [min] | Type | Width [min] | Area [mAU*s] | Height [mAU] | Area %  |
|--------|---------------|------|-------------|--------------|--------------|---------|
| 1      | 14.838        | BV   | 0.3273      | 2.35001e4    | 1126.83875   | 49.8194 |
| 2      | 16.025        | VB   | 0.3437      | 2.36705e4    | 1079.87891   | 50.1806 |

Totals : 4.71706e4 2206.71765

Signal 2: DAD1 B, Sig=230,4 Ref=360,100

| Peak # | RetTime [min] | Type | Width [min] | Area [mAU*s] | Height [mAU] | Area %  |
|--------|---------------|------|-------------|--------------|--------------|---------|
| 1      | 14.838        | BV   | 0.3056      | 1.25815e4    | 633.68262    | 49.9470 |
| 2      | 16.025        | VB   | 0.3224      | 1.26082e4    | 601.84320    | 50.0530 |

Totals : 2.51896e4 1235.52582

Signal 3: DAD1 C, Sig=254,4 Ref=360,100

| Peak # | RetTime [min] | Type | Width [min] | Area [mAU*s] | Height [mAU] | Area %  |
|--------|---------------|------|-------------|--------------|--------------|---------|
| 1      | 14.838        | BB   | 0.3067      | 9314.60254   | 467.08243    | 49.9373 |
| 2      | 16.025        | BB   | 0.3274      | 9338.00000   | 443.91196    | 50.0627 |

Totals : 1.86526e4 910.99438

Signal 4: DAD1 D, Sig=280,4 Ref=360,100

Signal 5: DAD1 E, Sig=310,4 Ref=360,100

\*\*\* End of Report \*\*\*

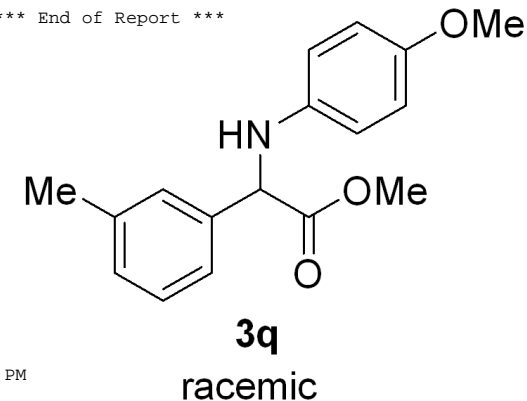

```

=====
Acq. Operator   :                               Seq. Line :    3
Acq. Instrument : Instrument 1                 Location   : Vial 52
Injection Date  : 10/1/2020 9:06:45 PM        Inj        :    1
                                           Inj Volume : 5.000 µl
Different Inj Volume from Sequence ! Actual Inj Volume : 3.000 µl
Acq. Method    : C:\CHEM32\1\DATA\QDY 2020-10-01 20-27-57\IC-05-30.M
Last changed   : 10/1/2020 9:01:47 PM
                                           (modified after loading)
Analysis Method : C:\CHEM32\1\METHODS\IC-10-10.M
Last changed   : 6/25/2018 2:48:18 PM
Additional Info : Peak(s) manually integrated
    
```

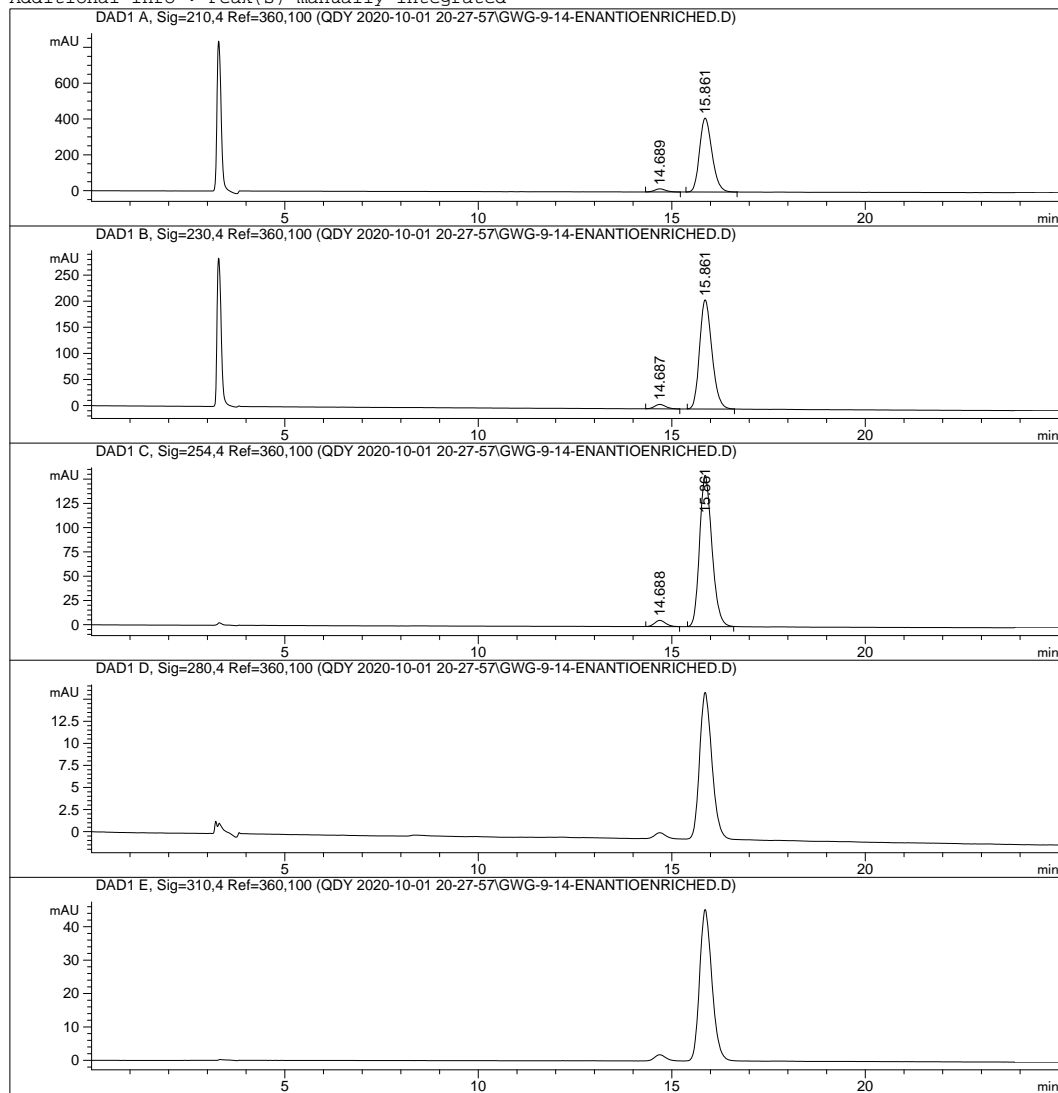

```

=====
Area Percent Report
=====
Sorted By      : Signal
Multiplier     : 1.0000
Dilution       : 1.0000
Use Multiplier & Dilution Factor with ISTDs
    
```

Signal 1: DAD1 A, Sig=210,4 Ref=360,100

| Peak # | RetTime [min] | Type | Width [min] | Area [mAU*s] | Height [mAU] | Area %  |
|--------|---------------|------|-------------|--------------|--------------|---------|
| 1      | 14.689        | BB   | 0.3072      | 347.31454    | 17.37383     | 3.6250  |
| 2      | 15.861        | BB   | 0.3450      | 9233.77246   | 412.78757    | 96.3750 |

Totals : 9581.08701 430.16140

Signal 2: DAD1 B, Sig=230,4 Ref=360,100

| Peak # | RetTime [min] | Type | Width [min] | Area [mAU*s] | Height [mAU] | Area %  |
|--------|---------------|------|-------------|--------------|--------------|---------|
| 1      | 14.687        | BB   | 0.3098      | 171.29361    | 8.54630      | 3.5665  |
| 2      | 15.861        | BB   | 0.3421      | 4631.50000   | 209.31664    | 96.4335 |

Totals : 4802.79361 217.86294

Signal 3: DAD1 C, Sig=254,4 Ref=360,100

| Peak # | RetTime [min] | Type | Width [min] | Area [mAU*s] | Height [mAU] | Area %  |
|--------|---------------|------|-------------|--------------|--------------|---------|
| 1      | 14.688        | BB   | 0.3098      | 128.17906    | 6.39562      | 3.5781  |
| 2      | 15.861        | BB   | 0.3425      | 3454.13062   | 155.90680    | 96.4219 |

Totals : 3582.30968 162.30241

Signal 4: DAD1 D, Sig=280,4 Ref=360,100

Signal 5: DAD1 E, Sig=310,4 Ref=360,100

\*\*\* End of Report \*\*\*

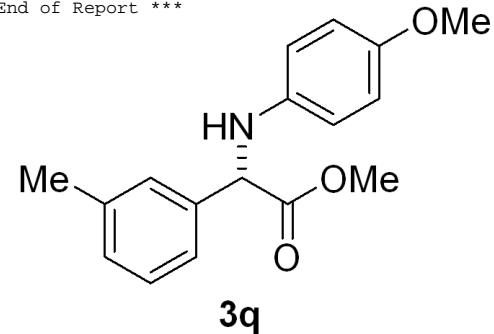

enantioenriched

Sample Name:

```

=====
Acq. Operator   :                               Seq. Line :    3
Acq. Instrument : Instrument 1                   Location  : Vial 52
Injection Date  : 9/10/2020 2:18:51 PM          Inj       :    1
                                                Inj Volume: 5.000 µl
Different Inj Volume from Sequence ! Actual Inj Volume : 3.000 µl
Acq. Method    : C:\CHEM32\1\DATA\QDY 2020-09-10 13-34-57\IC-05-30.M
Last changed   : 9/10/2020 1:46:58 PM
                                                (modified after loading)
Analysis Method: C:\CHEM32\1\METHODS\IC-10-10.M
Last changed   : 6/25/2018 2:48:18 PM
Additional Info : Peak(s) manually integrated

```

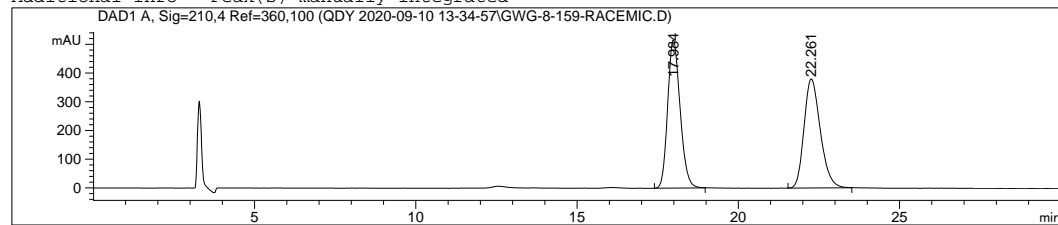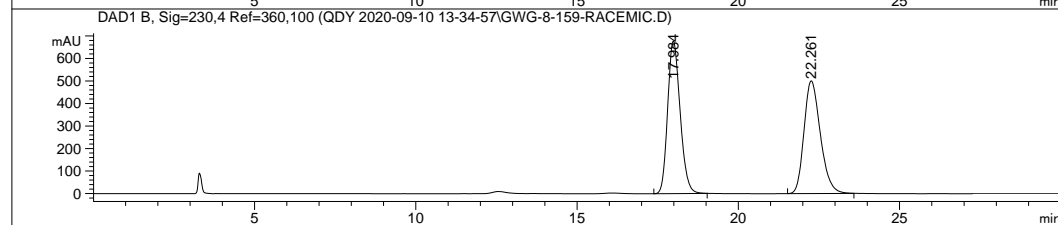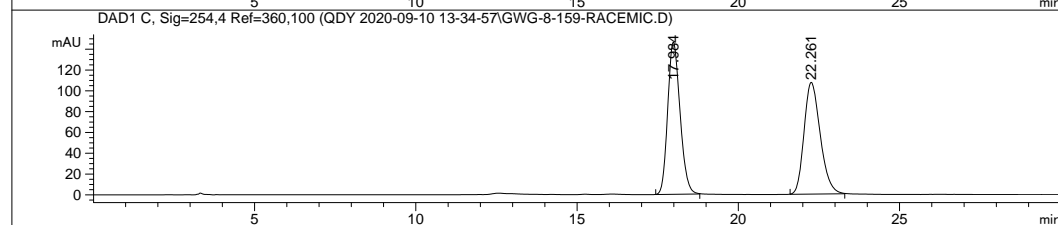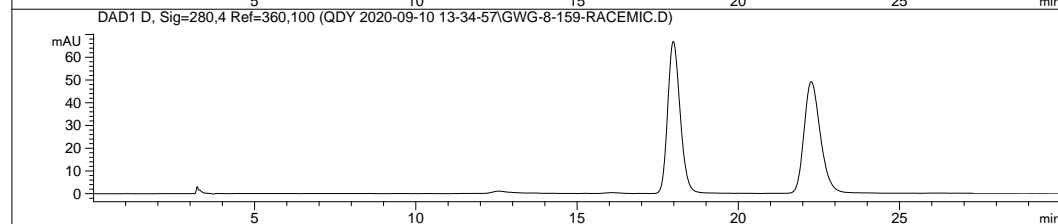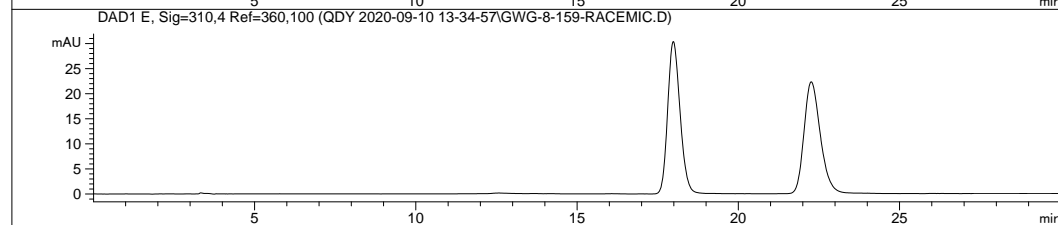

Sample Name:

```

=====
                          Area Percent Report
=====
Sorted By      :      Signal
Multiplier    :      1.0000
Dilution      :      1.0000
Use Multiplier & Dilution Factor with ISTDs

```

Signal 1: DAD1 A, Sig=210,4 Ref=360,100

| Peak # | RetTime [min] | Type | Width [min] | Area [mAU*s] | Height [mAU] | Area %  |
|--------|---------------|------|-------------|--------------|--------------|---------|
| 1      | 17.984        | BB   | 0.4141      | 1.37956e4    | 515.67871    | 50.8847 |
| 2      | 22.261        | BB   | 0.5409      | 1.33159e4    | 379.95822    | 49.1153 |

Totals : 2.71114e4 895.63693

Signal 2: DAD1 B, Sig=230,4 Ref=360,100

| Peak # | RetTime [min] | Type | Width [min] | Area [mAU*s] | Height [mAU] | Area %  |
|--------|---------------|------|-------------|--------------|--------------|---------|
| 1      | 17.984        | BB   | 0.4154      | 1.81871e4    | 676.97601    | 50.7853 |
| 2      | 22.261        | BB   | 0.5429      | 1.76246e4    | 500.43408    | 49.2147 |

Totals : 3.58117e4 1177.41010

Signal 3: DAD1 C, Sig=254,4 Ref=360,100

| Peak # | RetTime [min] | Type | Width [min] | Area [mAU*s] | Height [mAU] | Area %  |
|--------|---------------|------|-------------|--------------|--------------|---------|
| 1      | 17.984        | BB   | 0.4126      | 3891.23584   | 146.17824    | 50.9440 |
| 2      | 22.261        | BB   | 0.5389      | 3747.01807   | 107.43631    | 49.0560 |

Totals : 7638.25391 253.61455

Signal 4: DAD1 D, Sig=280,4 Ref=360,100

Signal 5: DAD1 E, Sig=310,4 Ref=360,100

\*\*\* End of Report \*\*\*

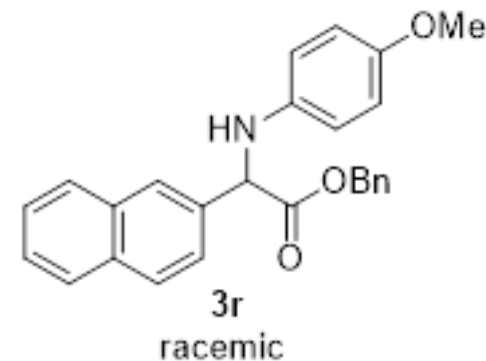

```

=====
Acq. Operator   :                               Seq. Line :    2
Acq. Instrument : Instrument 1                  Location   : Vial 51
Injection Date  : 9/10/2020 1:47:48 PM         Inj        :    1
                                                Inj Volume : 5.000 µl
Different Inj Volume from Sequence !      Actual Inj Volume : 3.000 µl
Acq. Method    : C:\CHEM32\1\DATA\QDY 2020-09-10 13-34-57\IC-05-30.M
Last changed   : 9/10/2020 1:46:58 PM         (modified after loading)
Analysis Method : C:\CHEM32\1\METHODS\IC-10-10.M
Last changed   : 6/25/2018 2:48:18 PM
Additional Info : Peak(s) manually integrated
    
```

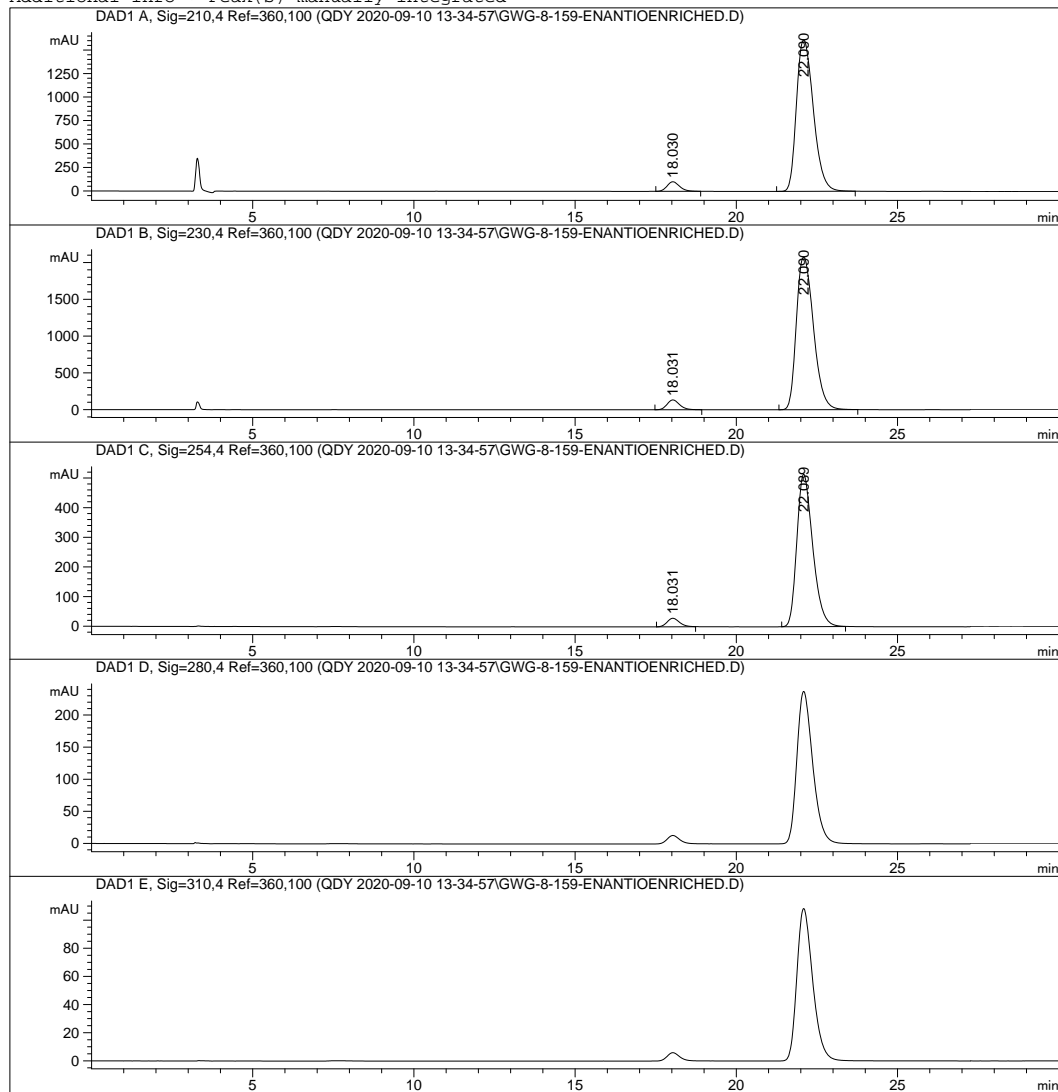

```

=====
                          Area Percent Report
=====
Sorted By      :      Signal
Multiplier     :      1.0000
Dilution      :      1.0000
Use Multiplier & Dilution Factor with ISTDs
    
```

Signal 1: DAD1 A, Sig=210,4 Ref=360,100

| Peak # | RetTime [min] | Type | Width [min] | Area [mAU*s] | Height [mAU] | Area %  |
|--------|---------------|------|-------------|--------------|--------------|---------|
| 1      | 18.030        | BB   | 0.4132      | 2758.36768   | 102.10255    | 4.4779  |
| 2      | 22.090        | BB   | 0.5741      | 5.88417e4    | 1611.20361   | 95.5221 |

Totals : 6.16001e4 1713.30617

Signal 2: DAD1 B, Sig=230,4 Ref=360,100

| Peak # | RetTime [min] | Type | Width [min] | Area [mAU*s] | Height [mAU] | Area %  |
|--------|---------------|------|-------------|--------------|--------------|---------|
| 1      | 18.031        | BB   | 0.4143      | 3613.62866   | 134.14085    | 4.5129  |
| 2      | 22.090        | BB   | 0.5801      | 7.64596e4    | 2073.82007   | 95.4871 |

Totals : 8.00732e4 2207.96092

Signal 3: DAD1 C, Sig=254,4 Ref=360,100

| Peak # | RetTime [min] | Type | Width [min] | Area [mAU*s] | Height [mAU] | Area %  |
|--------|---------------|------|-------------|--------------|--------------|---------|
| 1      | 18.031        | BB   | 0.4130      | 770.92889    | 28.73931     | 4.1917  |
| 2      | 22.089        | BB   | 0.5299      | 1.76208e4    | 514.12024    | 95.8083 |

Totals : 1.83918e4 542.85955

Signal 4: DAD1 D, Sig=280,4 Ref=360,100

Signal 5: DAD1 E, Sig=310,4 Ref=360,100

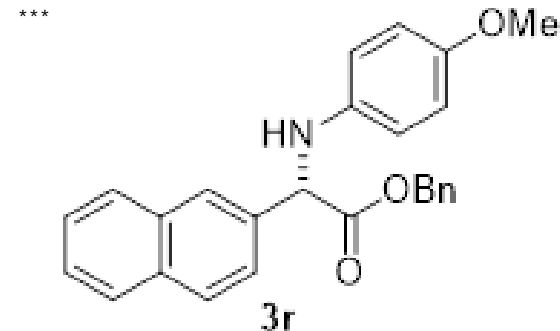

enantioenriched

```

=====
Acq. Operator   :                               Seq. Line :    3
Acq. Instrument : Instrument 1                   Location  : Vial 58
Injection Date  : 9/20/2020 9:20:31 PM          Inj       :    1
                                                Inj Volume: 5.000 µl
Different Inj Volume from Sequence ! Actual Inj Volume : 3.000 µl
Acq. Method    : C:\CHEM32\1\DATA\QDY 2020-09-20 20-26-37\AD-05-40.M
Last changed   : 9/20/2020 8:38:36 PM
                (modified after loading)
Analysis Method: C:\CHEM32\1\METHODS\OD-25-60.M
Last changed   : 9/17/2020 3:49:36 PM
Additional Info: Peak(s) manually integrated
    
```

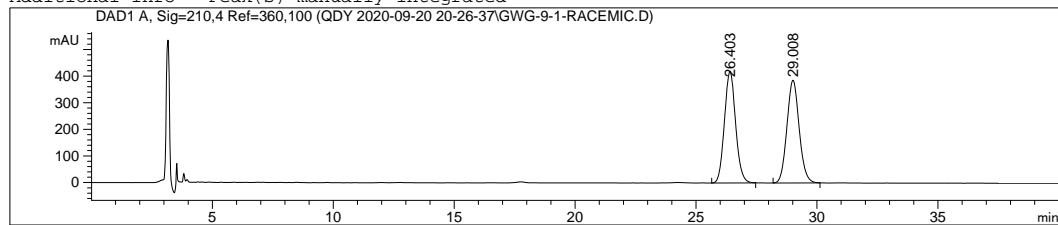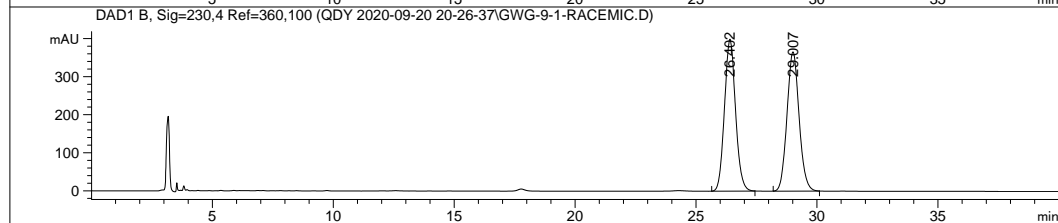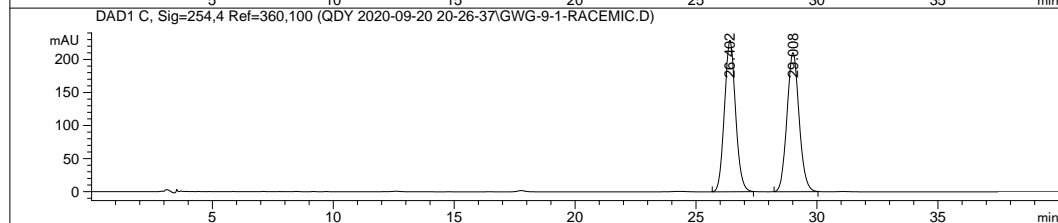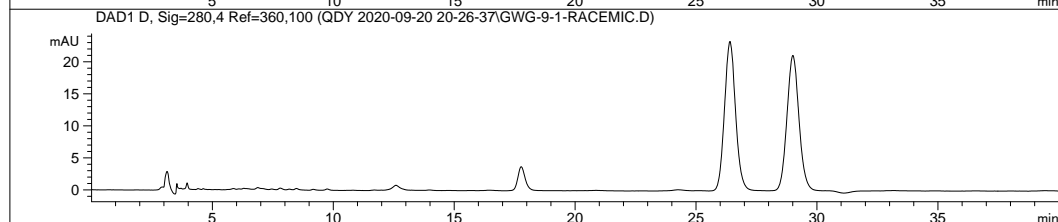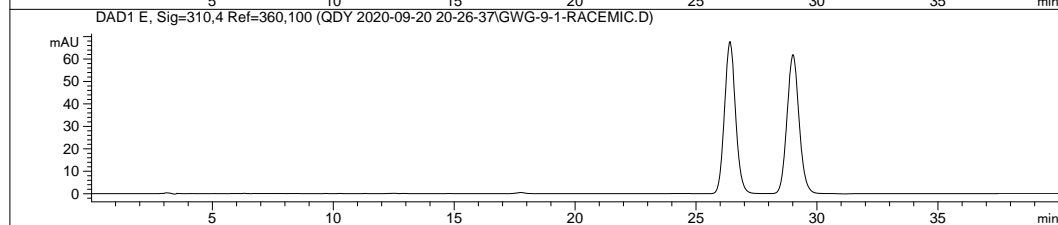

```

=====
                          Area Percent Report
=====
Sorted By      :      Signal
Multiplier     :      1.0000
Dilution       :      1.0000
Use Multiplier & Dilution Factor with ISTDs
    
```

Signal 1: DAD1 A, Sig=210,4 Ref=360,100

| Peak # | RetTime [min] | Type | Width [min] | Area [mAU*s] | Height [mAU] | Area %  |
|--------|---------------|------|-------------|--------------|--------------|---------|
| 1      | 26.403        | BB   | 0.4965      | 1.34850e4    | 420.08789    | 49.8311 |
| 2      | 29.008        | BB   | 0.5421      | 1.35764e4    | 386.19119    | 50.1689 |

Totals : 2.70613e4 806.27908

Signal 2: DAD1 B, Sig=230,4 Ref=360,100

| Peak # | RetTime [min] | Type | Width [min] | Area [mAU*s] | Height [mAU] | Area %  |
|--------|---------------|------|-------------|--------------|--------------|---------|
| 1      | 26.402        | BB   | 0.4889      | 1.26961e4    | 399.37640    | 49.9257 |
| 2      | 29.007        | BB   | 0.5360      | 1.27339e4    | 365.89413    | 50.0743 |

Totals : 2.54301e4 765.27054

Signal 3: DAD1 C, Sig=254,4 Ref=360,100

| Peak # | RetTime [min] | Type | Width [min] | Area [mAU*s] | Height [mAU] | Area %  |
|--------|---------------|------|-------------|--------------|--------------|---------|
| 1      | 26.402        | BB   | 0.4900      | 7304.78467   | 229.11505    | 49.8793 |
| 2      | 29.008        | BB   | 0.5373      | 7340.14648   | 210.27077    | 50.1207 |

Totals : 1.46449e4 439.38582

Signal 4: DAD1 D, Sig=280,4 Ref=360,100

Signal 5: DAD1 E, Sig=310,4 Ref=360,100

\*\*\* End of

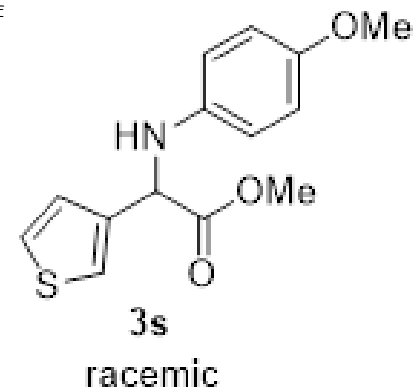

```

=====
Acq. Operator   :                               Seq. Line :    2
Acq. Instrument : Instrument 1                  Location  : Vial 59
Injection Date  : 9/20/2020 8:39:28 PM         Inj       :    1
                                                Inj Volume: 5.000 µl
Different Inj Volume from Sequence ! Actual Inj Volume : 3.000 µl
Acq. Method    : C:\CHEM32\1\DATA\QDY 2020-09-20 20-26-37\AD-05-40.M
Last changed   : 9/20/2020 8:38:36 PM
                                                (modified after loading)
Analysis Method : C:\CHEM32\1\METHODS\OD-25-60.M
Last changed   : 9/17/2020 3:49:36 PM
Additional Info : Peak(s) manually integrated
    
```

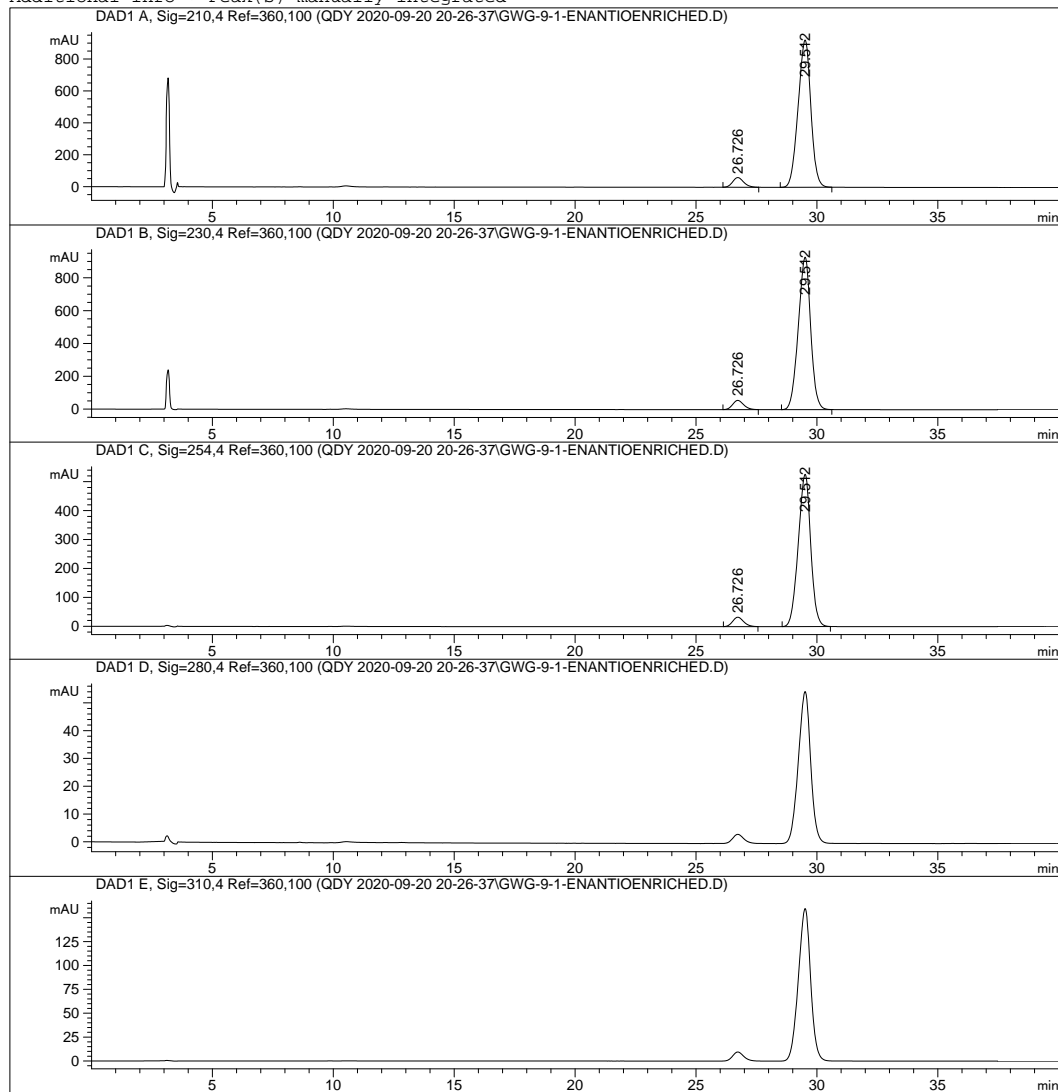

```

=====
                          Area Percent Report
=====
Sorted By      :      Signal
Multiplier     :      1.0000
Dilution       :      1.0000
Use Multiplier & Dilution Factor with ISTDs
    
```

Signal 1: DAD1 A, Sig=210,4 Ref=360,100

| Peak # | RetTime [min] | Type | Width [min] | Area [mAU*s] | Height [mAU] | Area %  |
|--------|---------------|------|-------------|--------------|--------------|---------|
| 1      | 26.726        | BB   | 0.4870      | 1945.73560   | 60.86244     | 5.4434  |
| 2      | 29.512        | BB   | 0.5672      | 3.37988e4    | 922.96783    | 94.5566 |

Totals : 3.57446e4 983.83028

Signal 2: DAD1 B, Sig=230,4 Ref=360,100

| Peak # | RetTime [min] | Type | Width [min] | Area [mAU*s] | Height [mAU] | Area %  |
|--------|---------------|------|-------------|--------------|--------------|---------|
| 1      | 26.726        | BB   | 0.4894      | 1792.55957   | 56.30274     | 5.1497  |
| 2      | 29.512        | BB   | 0.5446      | 3.30167e4    | 929.09381    | 94.8503 |

Totals : 3.48093e4 985.39655

Signal 3: DAD1 C, Sig=254,4 Ref=360,100

| Peak # | RetTime [min] | Type | Width [min] | Area [mAU*s] | Height [mAU] | Area %  |
|--------|---------------|------|-------------|--------------|--------------|---------|
| 1      | 26.726        | BB   | 0.4892      | 1038.13770   | 32.63188     | 5.2234  |
| 2      | 29.512        | BB   | 0.5512      | 1.88366e4    | 526.76526    | 94.7766 |

Totals : 1.98748e4 559.39714

Signal 4: DAD1 D, Sig=280,4 Ref=360,100

Signal 5: DAD1 E, Sig=310,4 Ref=360,100

\*\*\* End of R

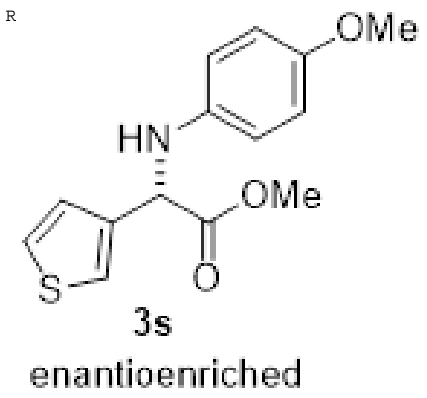



```

=====
Acq. Operator   :                               Seq. Line :    5
Acq. Instrument : Instrument 1                   Location  : Vial 53
Injection Date  : 10/1/2020 9:43:53 PM          Inj       :    1
                                                Inj Volume: 5.000 µl
Different Inj Volume from Sequence ! Actual Inj Volume : 3.000 µl
Acq. Method    : C:\CHEM32\1\DATA\QDY 2020-10-01 20-27-57\IC-05-30.M
Last changed   : 10/1/2020 9:55:16 PM
                (modified after loading)
Analysis Method: C:\CHEM32\1\METHODS\IC-10-10.M
Last changed   : 6/25/2018 2:48:18 PM
Additional Info: Peak(s) manually integrated
  
```

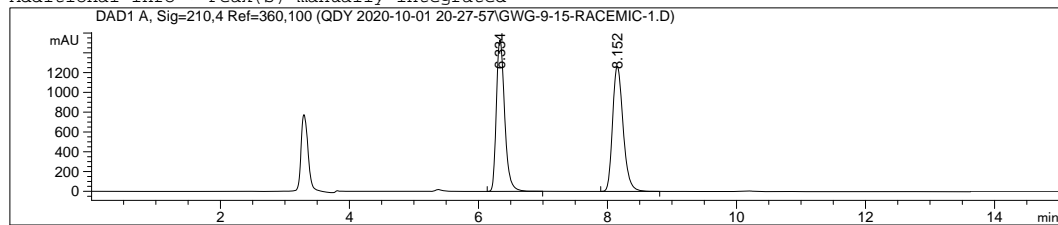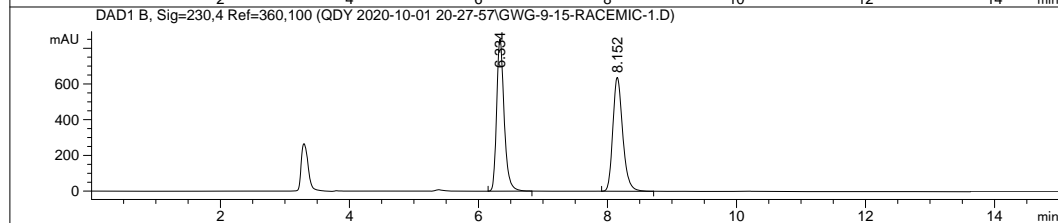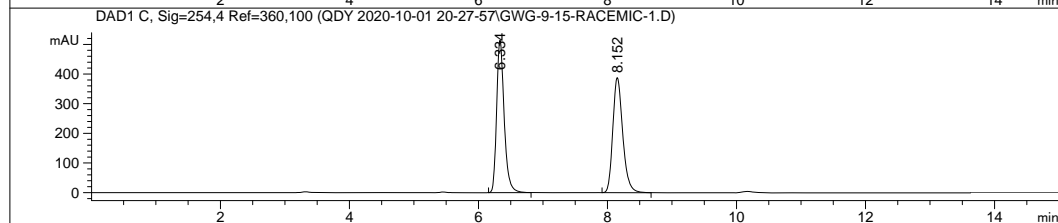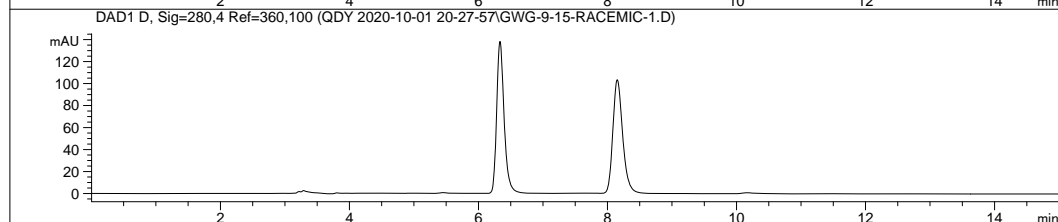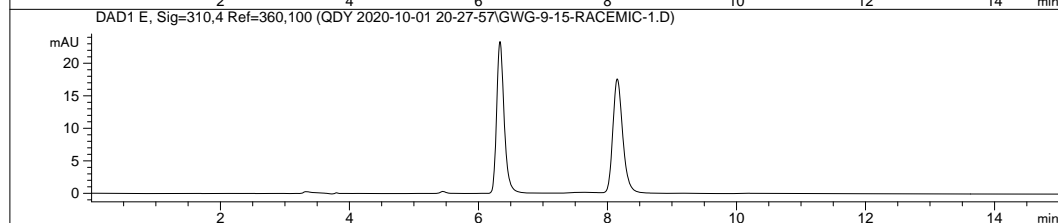

```

=====
                          Area Percent Report
=====
Sorted By      :      Signal
Multiplier     :      1.0000
Dilution       :      1.0000
Use Multiplier & Dilution Factor with ISTDs
  
```

Signal 1: DAD1 A, Sig=210,4 Ref=360,100

| Peak # | RetTime [min] | Type | Width [min] | Area [mAU*s] | Height [mAU] | Area %  |
|--------|---------------|------|-------------|--------------|--------------|---------|
| 1      | 6.334         | BB   | 0.1381      | 1.36477e4    | 1529.98914   | 48.7856 |
| 2      | 8.152         | BB   | 0.1763      | 1.43271e4    | 1263.26636   | 51.2144 |

Totals : 2.79748e4 2793.25549

Signal 2: DAD1 B, Sig=230,4 Ref=360,100

| Peak # | RetTime [min] | Type | Width [min] | Area [mAU*s] | Height [mAU] | Area %  |
|--------|---------------|------|-------------|--------------|--------------|---------|
| 1      | 6.334         | BB   | 0.1216      | 6831.34424   | 851.50146    | 50.2574 |
| 2      | 8.152         | BB   | 0.1617      | 6761.37207   | 637.66229    | 49.7426 |

Totals : 1.35927e4 1489.16376

Signal 3: DAD1 C, Sig=254,4 Ref=360,100

| Peak # | RetTime [min] | Type | Width [min] | Area [mAU*s] | Height [mAU] | Area %  |
|--------|---------------|------|-------------|--------------|--------------|---------|
| 1      | 6.334         | BB   | 0.1224      | 4163.83057   | 514.40582    | 50.1080 |
| 2      | 8.152         | BB   | 0.1646      | 4145.88477   | 388.29019    | 49.8920 |

Totals : 8309.71533 902.69601

Signal 4: DAD1 D, Sig=280,4 Ref=360,100

Signal 5: DAD1 E, Sig=310,4 Ref=360,100

\*\*\* End of Report \*\*\*

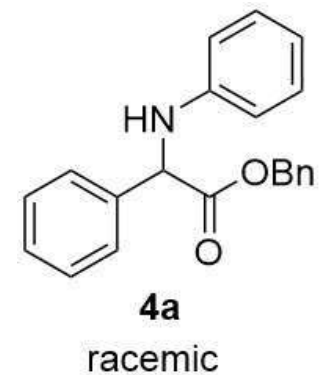

```

=====
Acq. Operator   :                               Seq. Line :    6
Acq. Instrument : Instrument 1                   Location  : Vial 54
Injection Date  : 10/1/2020 9:59:52 PM          Inj       :    1
                                                Inj Volume: 5.000 µl
Different Inj Volume from Sequence ! Actual Inj Volume : 3.000 µl
Acq. Method    : C:\CHEM32\1\DATA\QDY 2020-10-01 20-27-57\IC-05-30.M
Last changed   : 10/1/2020 9:55:16 PM
                (modified after loading)
Analysis Method: C:\CHEM32\1\METHODS\IC-10-10.M
Last changed   : 6/25/2018 2:48:18 PM
Additional Info: Peak(s) manually integrated
  
```

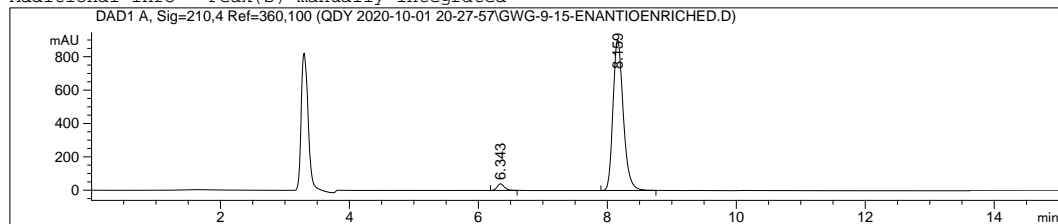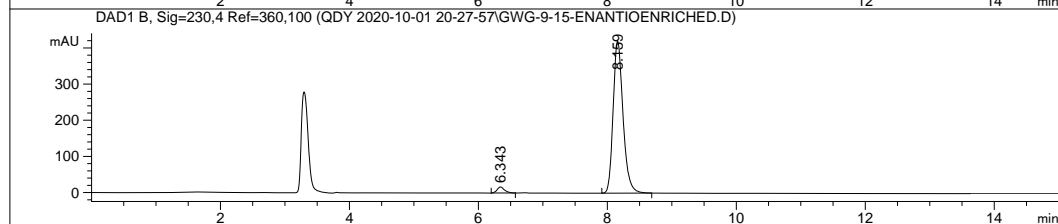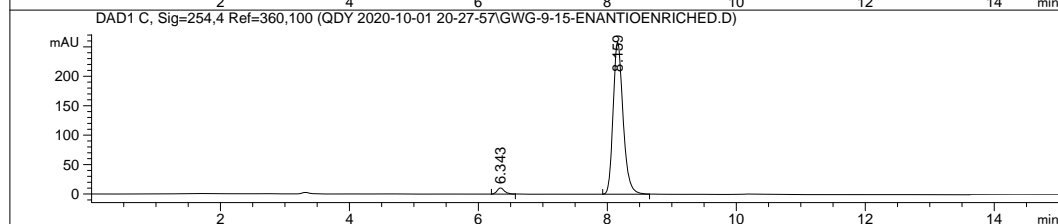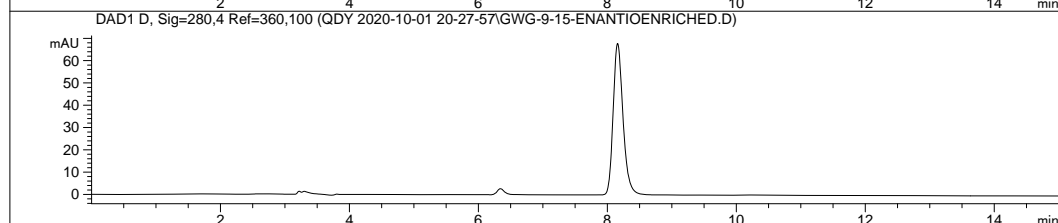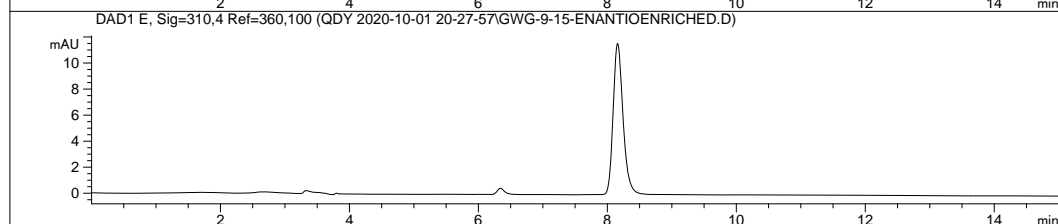

```

=====
                          Area Percent Report
=====
Sorted By      :      Signal
Multiplier    :      1.0000
Dilution      :      1.0000
Use Multiplier & Dilution Factor with ISTDs
  
```

Signal 1: DAD1 A, Sig=210,4 Ref=360,100

| Peak # | RetTime [min] | Type | Width [min] | Area [mAU*s] | Height [mAU] | Area %  |
|--------|---------------|------|-------------|--------------|--------------|---------|
| 1      | 6.343         | BB   | 0.1221      | 315.79340    | 40.01955     | 3.0764  |
| 2      | 8.159         | BB   | 0.1687      | 9949.17090   | 901.94348    | 96.9236 |

Totals : 1.02650e4 941.96303

Signal 2: DAD1 B, Sig=230,4 Ref=360,100

| Peak # | RetTime [min] | Type | Width [min] | Area [mAU*s] | Height [mAU] | Area %  |
|--------|---------------|------|-------------|--------------|--------------|---------|
| 1      | 6.343         | BB   | 0.1207      | 129.99261    | 16.72466     | 2.8233  |
| 2      | 8.159         | BB   | 0.1641      | 4474.32471   | 420.53915    | 97.1767 |

Totals : 4604.31732 437.26382

Signal 3: DAD1 C, Sig=254,4 Ref=360,100

| Peak # | RetTime [min] | Type | Width [min] | Area [mAU*s] | Height [mAU] | Area %  |
|--------|---------------|------|-------------|--------------|--------------|---------|
| 1      | 6.343         | BB   | 0.1216      | 82.40293     | 10.49207     | 2.8988  |
| 2      | 8.159         | BB   | 0.1647      | 2760.25903   | 258.17502    | 97.1012 |

Totals : 2842.66196 268.66709

Signal 4: DAD1 D, Sig=280,4 Ref=360,100

Signal 5: DAD1 E, Sig=310,4 Ref=360,100

\*\*\* End of Report \*\*\*

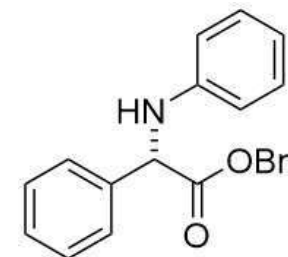

4a

enantioenriched

```

=====
Acq. Operator   :                               Seq. Line :    8
Acq. Instrument : Instrument 1                  Location  : Vial 55
Injection Date  : 10/1/2020 10:26:58 PM       Inj       :    1
                                                Inj Volume: 5.000 µl
Different Inj Volume from Sequence ! Actual Inj Volume : 3.000 µl
Acq. Method     : C:\CHEM32\1\DATA\QDY 2020-10-01 20-27-57\IC-05-30.M
Last changed    : 10/1/2020 10:40:13 PM
                (modified after loading)
Analysis Method : C:\CHEM32\1\METHODS\IC-10-10.M
Last changed    : 6/25/2018 2:48:18 PM
Additional Info  : Peak(s) manually integrated
    
```

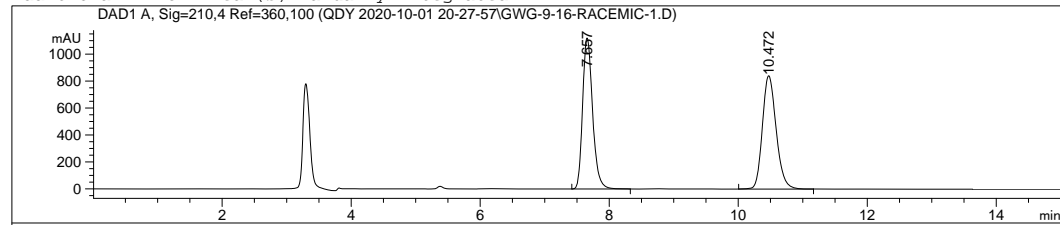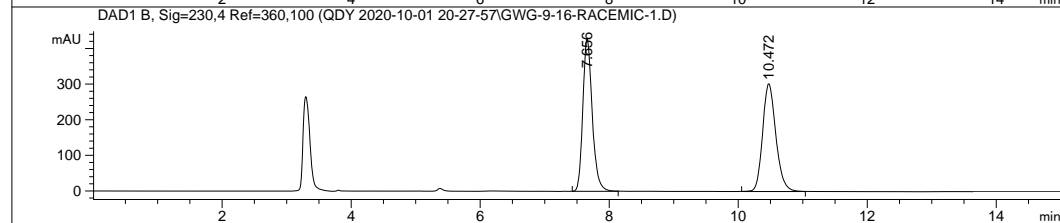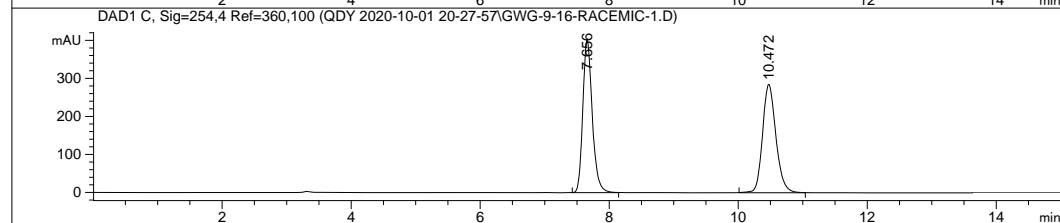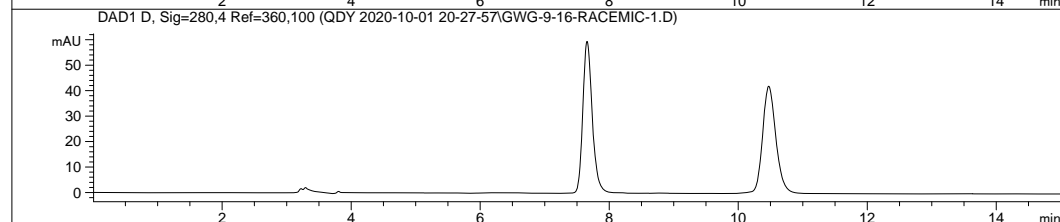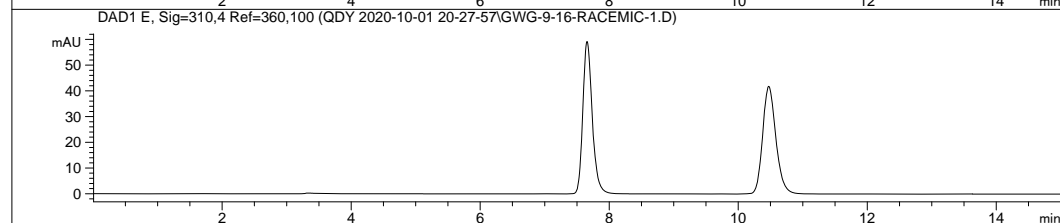

Area Percent Report

```

Sorted By      : Signal
Multiplier     : 1.0000
Dilution       : 1.0000
Use Multiplier & Dilution Factor with ISTDs
    
```

Signal 1: DAD1 A, Sig=210,4 Ref=360,100

| Peak # | RetTime [min] | Type | Width [min] | Area [mAU*s] | Height [mAU] | Area %  |
|--------|---------------|------|-------------|--------------|--------------|---------|
| 1      | 7.657         | BB   | 0.1651      | 1.20157e4    | 1120.98608   | 49.1311 |
| 2      | 10.472        | BB   | 0.2307      | 1.24407e4    | 840.58875    | 50.8689 |

Totals : 2.44565e4 1961.57483

Signal 2: DAD1 B, Sig=230,4 Ref=360,100

| Peak # | RetTime [min] | Type | Width [min] | Area [mAU*s] | Height [mAU] | Area %  |
|--------|---------------|------|-------------|--------------|--------------|---------|
| 1      | 7.656         | BB   | 0.1541      | 4329.91943   | 427.64667    | 50.0556 |
| 2      | 10.472        | BB   | 0.2186      | 4320.30322   | 302.51138    | 49.9444 |

Totals : 8650.22266 730.15805

Signal 3: DAD1 C, Sig=254,4 Ref=360,100

| Peak # | RetTime [min] | Type | Width [min] | Area [mAU*s] | Height [mAU] | Area %  |
|--------|---------------|------|-------------|--------------|--------------|---------|
| 1      | 7.656         | BB   | 0.1547      | 4080.04590   | 401.04770    | 49.8467 |
| 2      | 10.472        | BB   | 0.2221      | 4105.14941   | 284.98923    | 50.1533 |

Totals : 8185.19531 686.03693

Signal 4: DAD1 D, Sig=280,4 Ref=360,100

Signal 5: DAD1 E, Sig=310,4 Ref=360,100

\*\*\* End of Report \*\*\*

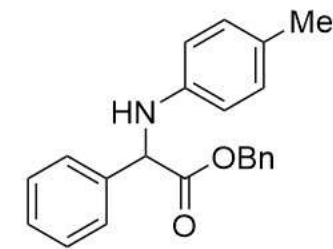

**4b**  
 racemic

```
=====
Acq. Operator   :                               Seq. Line :    9
Acq. Instrument : Instrument 1                   Location  : Vial 56
Injection Date  : 10/1/2020 10:43:00 PM         Inj       :    1
                                                Inj Volume: 5.000 µl
Different Inj Volume from Sequence ! Actual Inj Volume : 3.000 µl
Acq. Method    : C:\CHEM32\1\DATA\QDY 2020-10-01 20-27-57\IC-05-30.M
Last changed   : 10/1/2020 10:40:13 PM
                (modified after loading)
Analysis Method: C:\CHEM32\1\METHODS\IC-10-10.M
Last changed   : 6/25/2018 2:48:18 PM
Additional Info : Peak(s) manually integrated
=====
```

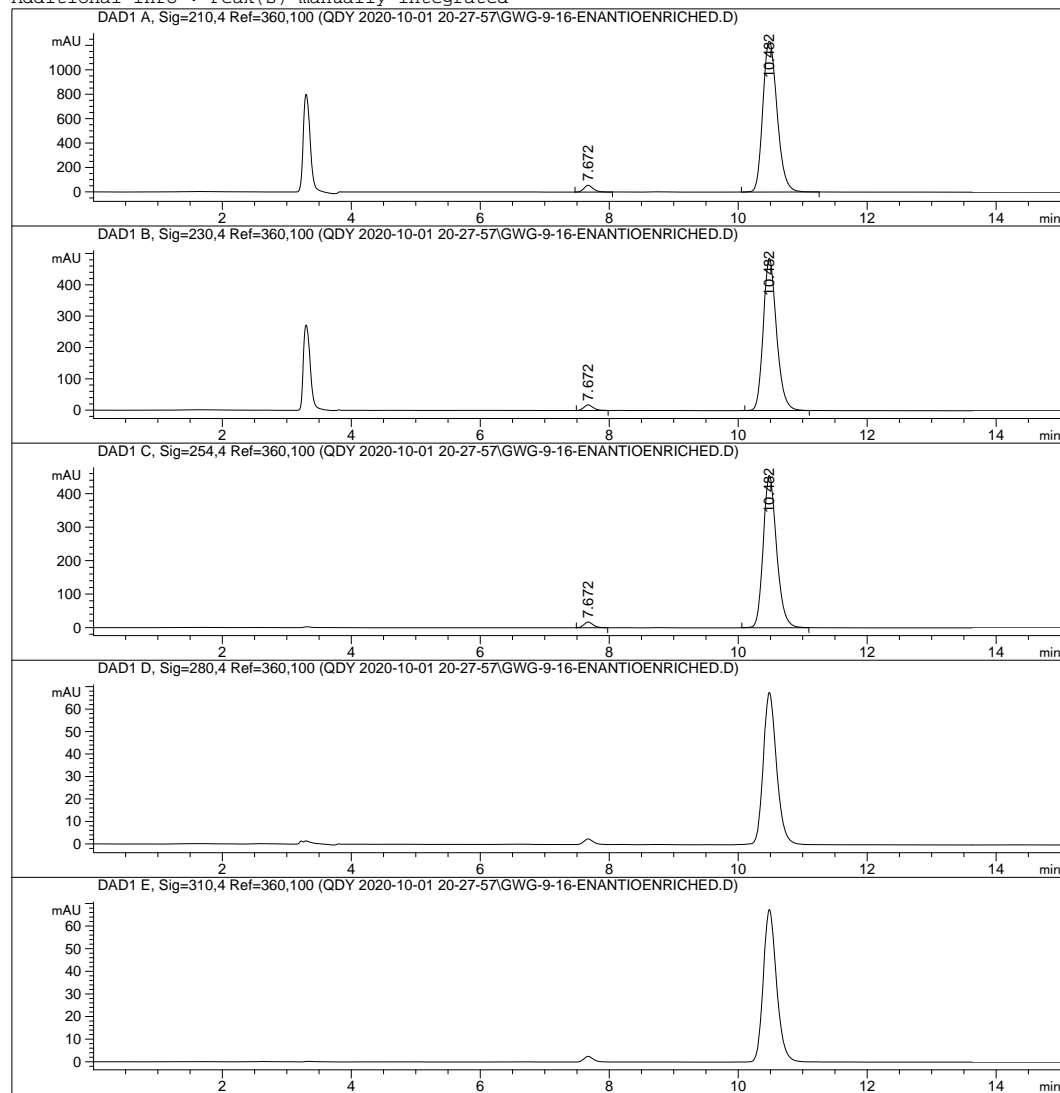

```
=====
                          Area Percent Report
=====
Sorted By      :      Signal
Multiplier    :      1.0000
Dilution      :      1.0000
Use Multiplier & Dilution Factor with ISTDs
```

Signal 1: DAD1 A, Sig=210,4 Ref=360,100

| Peak # | RetTime [min] | Type | Width [min] | Area [mAU*s] | Height [mAU] | Area %  |
|--------|---------------|------|-------------|--------------|--------------|---------|
| 1      | 7.672         | BB   | 0.1534      | 557.14185    | 55.38483     | 2.8481  |
| 2      | 10.482        | BB   | 0.2413      | 1.90044e4    | 1236.79028   | 97.1519 |

Totals : 1.95616e4 1292.17511

Signal 2: DAD1 B, Sig=230,4 Ref=360,100

| Peak # | RetTime [min] | Type | Width [min] | Area [mAU*s] | Height [mAU] | Area %  |
|--------|---------------|------|-------------|--------------|--------------|---------|
| 1      | 7.672         | BB   | 0.1511      | 178.08618    | 18.04414     | 2.4920  |
| 2      | 10.482        | BB   | 0.2211      | 6968.24902   | 486.43753    | 97.5080 |

Totals : 7146.33521 504.48167

Signal 3: DAD1 C, Sig=254,4 Ref=360,100

| Peak # | RetTime [min] | Type | Width [min] | Area [mAU*s] | Height [mAU] | Area %  |
|--------|---------------|------|-------------|--------------|--------------|---------|
| 1      | 7.672         | BB   | 0.1517      | 170.65707    | 17.21195     | 2.5341  |
| 2      | 10.482        | BB   | 0.2222      | 6563.81445   | 455.22379    | 97.4659 |

Totals : 6734.47153 472.43574

Signal 4: DAD1 D, Sig=280,4 Ref=360,100

Signal 5: DAD1 E, Sig=310,4 Ref=360,100

\*\*\* End of Report \*\*\*

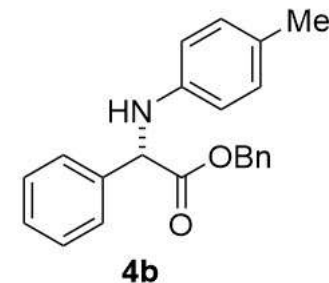

enantioenriched

```
=====
Acq. Operator   :                               Seq. Line :   10
Acq. Instrument : Instrument 1                   Location   : Vial 57
Injection Date  : 10/1/2020 10:59:00 PM         Inj        :    1
                                                Inj Volume : 5.000 µl
Different Inj Volume from Sequence ! Actual Inj Volume : 3.000 µl
Acq. Method    : C:\CHEM32\1\DATA\QDY 2020-10-01 20-27-57\IC-05-30.M
Last changed   : 10/1/2020 11:07:50 PM
                (modified after loading)
Analysis Method : C:\CHEM32\1\METHODS\IC-10-10.M
Last changed   : 6/25/2018 2:48:18 PM
Additional Info : Peak(s) manually integrated
```

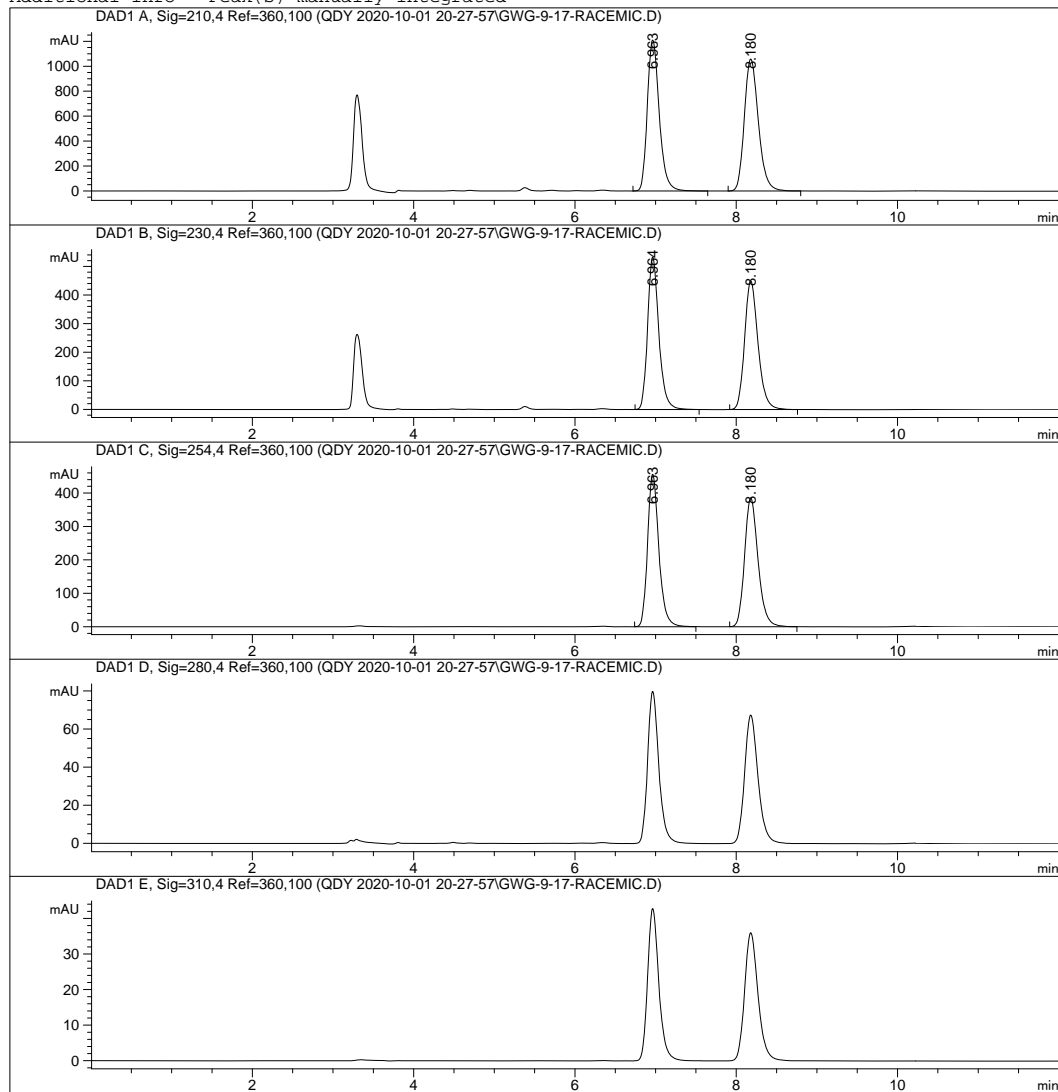

```
=====
                          Area Percent Report
=====
Sorted By      :      Signal
Multiplier     :      1.0000
Dilution       :      1.0000
Use Multiplier & Dilution Factor with ISTDs
```

Signal 1: DAD1 A, Sig=210,4 Ref=360,100

| Peak #   | RetTime [min] | Type | Width [min] | Area [mAU*s] | Height [mAU] | Area %  |
|----------|---------------|------|-------------|--------------|--------------|---------|
| 1        | 6.963         | BB   | 0.1600      | 1.24612e4    | 1211.26855   | 49.2895 |
| 2        | 8.180         | BB   | 0.1873      | 1.28205e4    | 1058.64917   | 50.7105 |
| Totals : |               |      |             | 2.52817e4    | 2269.91772   |         |

Signal 2: DAD1 B, Sig=230,4 Ref=360,100

| Peak #   | RetTime [min] | Type | Width [min] | Area [mAU*s] | Height [mAU] | Area %  |
|----------|---------------|------|-------------|--------------|--------------|---------|
| 1        | 6.964         | BB   | 0.1488      | 5157.12793   | 533.17487    | 49.8173 |
| 2        | 8.180         | BB   | 0.1767      | 5194.95508   | 449.78061    | 50.1827 |
| Totals : |               |      |             | 1.03521e4    | 982.95547    |         |

Signal 3: DAD1 C, Sig=254,4 Ref=360,100

| Peak #   | RetTime [min] | Type | Width [min] | Area [mAU*s] | Height [mAU] | Area %  |
|----------|---------------|------|-------------|--------------|--------------|---------|
| 1        | 6.963         | BB   | 0.1494      | 4438.32910   | 456.49121    | 49.7822 |
| 2        | 8.180         | BB   | 0.1774      | 4477.17041   | 385.66653    | 50.2178 |
| Totals : |               |      |             | 8915.49951   | 842.15775    |         |

Signal 4: DAD1 D, Sig=280,4 Ref=360,100

Signal 5: DAD1 E, Sig=310,4 Ref=360,100

=====  
\*\*\* End of I

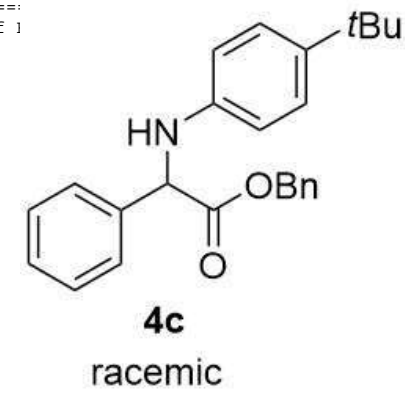

```

=====
Acq. Operator   :                               Seq. Line : 11
Acq. Instrument : Instrument 1                   Location  : Vial 58
Injection Date  : 10/1/2020 11:12:01 PM         Inj       : 1
                                                Inj Volume: 5.000 µl
Different Inj Volume from Sequence ! Actual Inj Volume : 3.000 µl
Acq. Method    : C:\CHEM32\1\DATA\QDY 2020-10-01 20-27-57\IC-05-30.M
Last changed   : 10/1/2020 11:07:50 PM
                (modified after loading)
Analysis Method : C:\CHEM32\1\METHODS\IC-10-10.M
Last changed   : 6/25/2018 2:48:18 PM
Additional Info : Peak(s) manually integrated
    
```

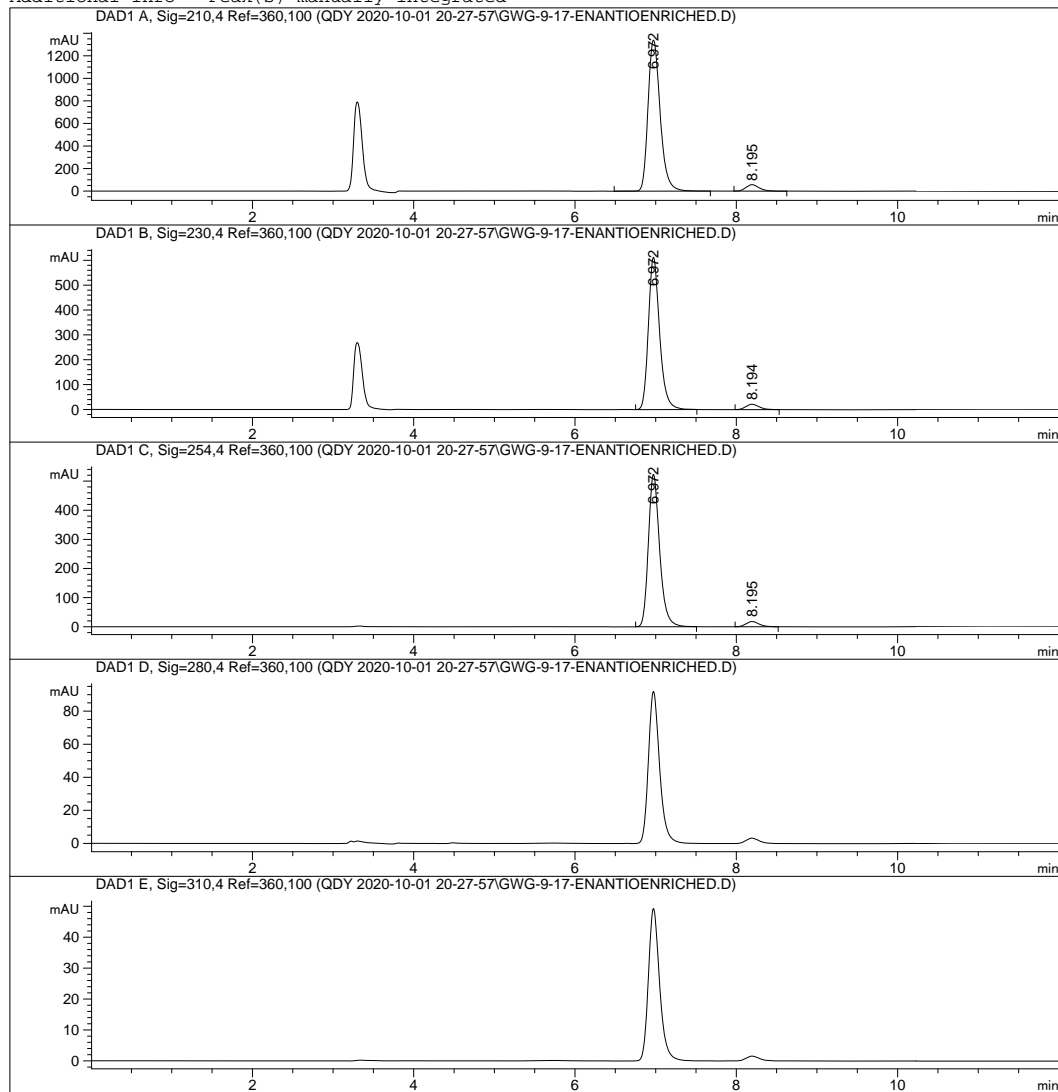

```

=====
                          Area Percent Report
=====
Sorted By      :      Signal
Multiplier    :      1.0000
Dilution      :      1.0000
Use Multiplier & Dilution Factor with ISTDs
    
```

Signal 1: DAD1 A, Sig=210,4 Ref=360,100

| Peak # | RetTime [min] | Type | Width [min] | Area [mAU*s] | Height [mAU] | Area %  |
|--------|---------------|------|-------------|--------------|--------------|---------|
| 1      | 6.972         | VB   | 0.1642      | 1.40315e4    | 1340.08923   | 95.5149 |
| 2      | 8.195         | BB   | 0.1761      | 658.88342    | 57.33081     | 4.4851  |

Totals : 1.46904e4 1397.42004

Signal 2: DAD1 B, Sig=230,4 Ref=360,100

| Peak # | RetTime [min] | Type | Width [min] | Area [mAU*s] | Height [mAU] | Area %  |
|--------|---------------|------|-------------|--------------|--------------|---------|
| 1      | 6.972         | BB   | 0.1468      | 5927.17725   | 612.96295    | 96.0053 |
| 2      | 8.194         | BB   | 0.1745      | 246.62689    | 21.70793     | 3.9947  |

Totals : 6173.80414 634.67088

Signal 3: DAD1 C, Sig=254,4 Ref=360,100

| Peak # | RetTime [min] | Type | Width [min] | Area [mAU*s] | Height [mAU] | Area %  |
|--------|---------------|------|-------------|--------------|--------------|---------|
| 1      | 6.972         | BB   | 0.1476      | 5094.22949   | 523.39740    | 96.1209 |
| 2      | 8.195         | BB   | 0.1746      | 205.58678    | 18.08955     | 3.8791  |

Totals : 5299.81627 541.48695

Signal 4: DAD1 D, Sig=280,4 Ref=360,100

Signal 5: DAD1 E, Sig=310,4 Ref=360,100

\*\*\* End of Report \*\*\*

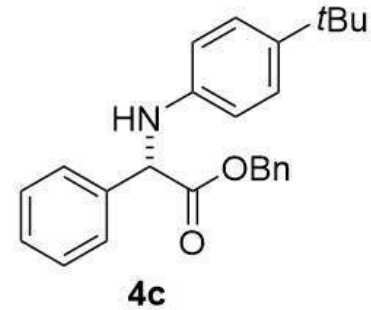

enantioenriched

Sample Name:

```

=====
Acq. Operator   :                               Seq. Line : 12
Acq. Instrument : Instrument 1                   Location  : Vial 59
Injection Date  : 10/1/2020 11:25:00 PM        Inj       : 1
                                                Inj Volume: 5.000 µl
Different Inj Volume from Sequence ! Actual Inj Volume : 3.000 µl
Acq. Method    : C:\CHEM32\1\DATA\QDY 2020-10-01 20-27-57\IC-05-30.M
Last changed   : 10/1/2020 11:07:50 PM
                (modified after loading)
Analysis Method: C:\CHEM32\1\METHODS\IC-10-10.M
Last changed   : 6/25/2018 2:48:18 PM
Additional Info : Peak(s) manually integrated
  
```

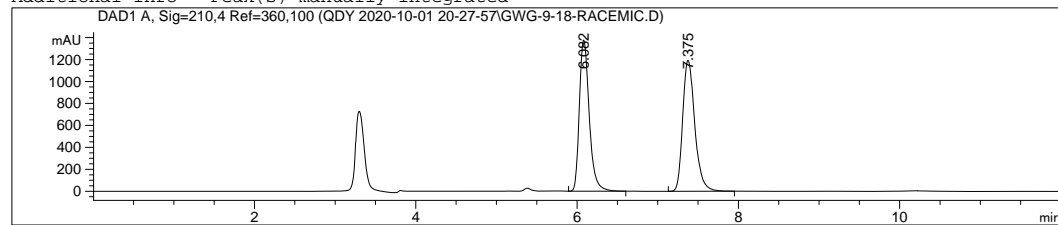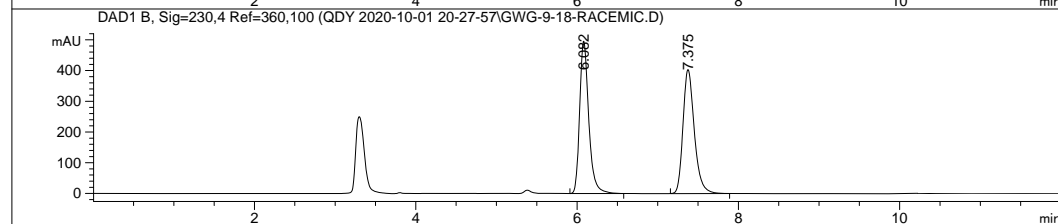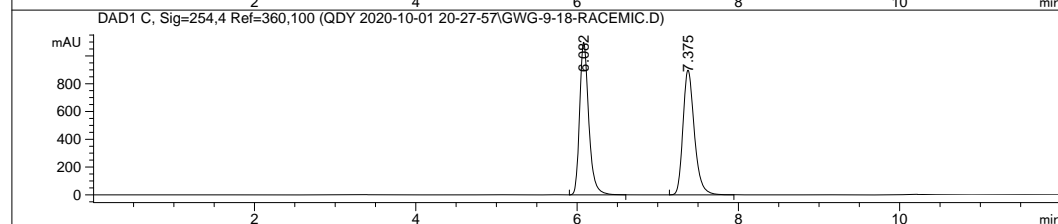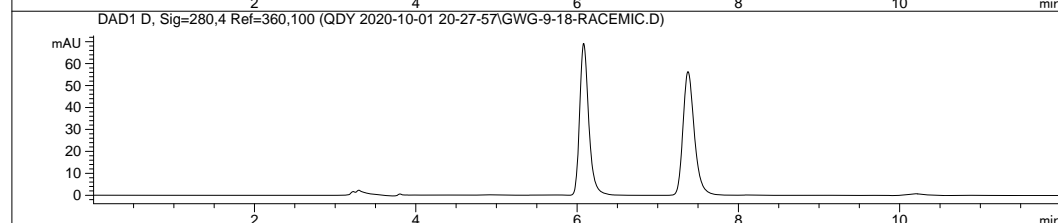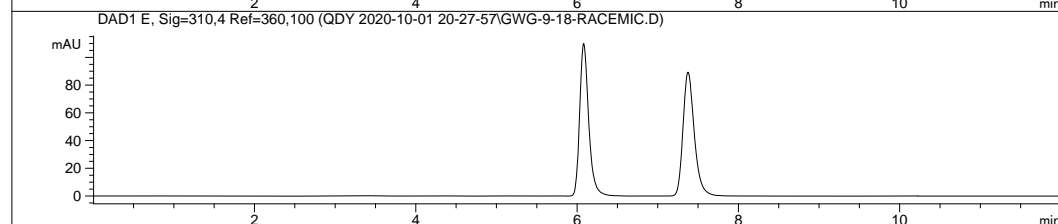

Sample Name:

```

=====
                          Area Percent Report
=====
Sorted By      :      Signal
Multiplier     :      1.0000
Dilution       :      1.0000
Use Multiplier & Dilution Factor with ISTDs
  
```

Signal 1: DAD1 A, Sig=210,4 Ref=360,100

| Peak # | RetTime [min] | Type | Width [min] | Area [mAU*s] | Height [mAU] | Area %  |
|--------|---------------|------|-------------|--------------|--------------|---------|
| 1      | 6.082         | VB   | 0.1311      | 1.17102e4    | 1378.48584   | 48.5830 |
| 2      | 7.375         | BB   | 0.1613      | 1.23933e4    | 1192.46826   | 51.4170 |

Totals : 2.41036e4 2570.95410

Signal 2: DAD1 B, Sig=230,4 Ref=360,100

| Peak # | RetTime [min] | Type | Width [min] | Area [mAU*s] | Height [mAU] | Area %  |
|--------|---------------|------|-------------|--------------|--------------|---------|
| 1      | 6.082         | BB   | 0.1191      | 3877.08325   | 496.49344    | 49.5671 |
| 2      | 7.375         | BB   | 0.1500      | 3944.80884   | 403.79990    | 50.4329 |

Totals : 7821.89209 900.29333

Signal 3: DAD1 C, Sig=254,4 Ref=360,100

| Peak # | RetTime [min] | Type | Width [min] | Area [mAU*s] | Height [mAU] | Area %  |
|--------|---------------|------|-------------|--------------|--------------|---------|
| 1      | 6.082         | BB   | 0.1193      | 8601.14258   | 1099.64771   | 49.4164 |
| 2      | 7.375         | BB   | 0.1504      | 8804.28418   | 898.14313    | 50.5836 |

Totals : 1.74054e4 1997.79083

Signal 4: DAD1 D, Sig=280,4 Ref=360,100

Signal 5: DAD1 E, Sig=310,4 Ref=360,100

\*\*\* End of Re

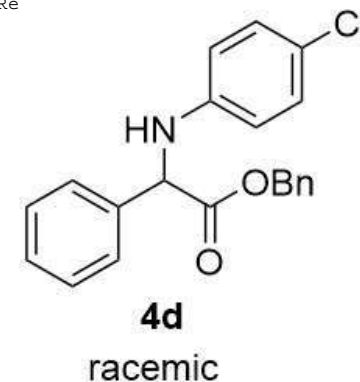

```

=====
Acq. Operator   :                               Seq. Line :    1
Acq. Instrument : Instrument 1                   Location   : Vial 60
Injection Date  : 10/1/2020 11:40:01 PM         Inj        :    1
                                                Inj Volume : 5.000 µl
Different Inj Volume from Sequence ! Actual Inj Volume : 3.000 µl
Acq. Method    : C:\CHEM32\1\DATA\QDY 2020-10-01 23-38-16\IC-05-30.M
Last changed   : 10/1/2020 11:51:25 PM
                                                (modified after loading)
Analysis Method: C:\CHEM32\1\METHODS\IC-10-10.M
Last changed   : 6/25/2018 2:48:18 PM
Additional Info : Peak(s) manually integrated
  
```

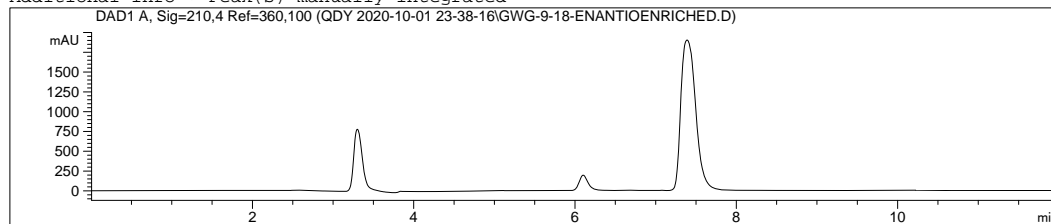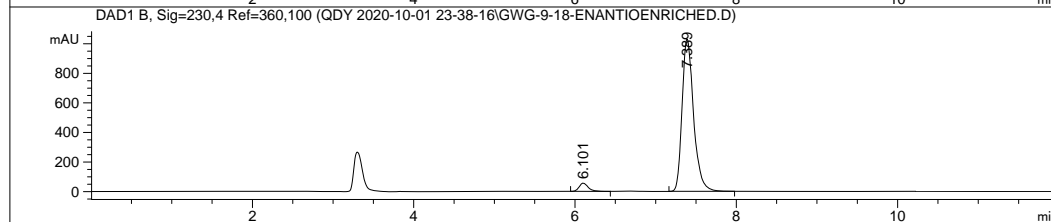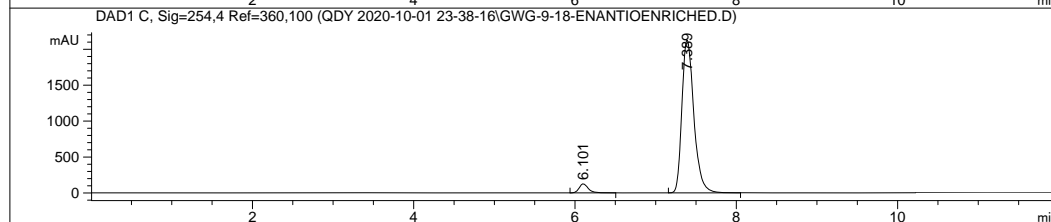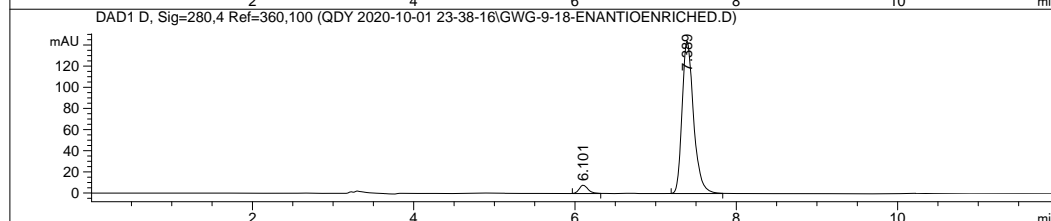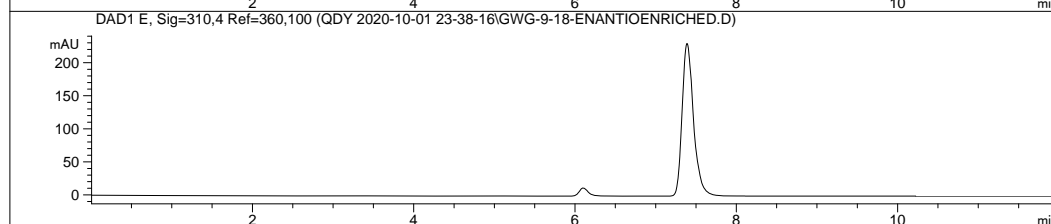

```

=====
                          Area Percent Report
=====
Sorted By      :      Signal
Multiplier    :      1.0000
Dilution      :      1.0000
Use Multiplier & Dilution Factor with ISTDs
  
```

Signal 1: DAD1 A, Sig=210,4 Ref=360,100

Signal 2: DAD1 B, Sig=230,4 Ref=360,100

| Peak # | RetTime [min] | Type | Width [min] | Area [mAU*s] | Height [mAU] | Area %  |
|--------|---------------|------|-------------|--------------|--------------|---------|
| 1      | 6.101         | BB   | 0.1183      | 433.94809    | 56.05241     | 4.0848  |
| 2      | 7.389         | BB   | 0.1514      | 1.01895e4    | 1030.00378   | 95.9152 |

Totals : 1.06235e4 1086.05620

Signal 3: DAD1 C, Sig=254,4 Ref=360,100

| Peak # | RetTime [min] | Type | Width [min] | Area [mAU*s] | Height [mAU] | Area %  |
|--------|---------------|------|-------------|--------------|--------------|---------|
| 1      | 6.101         | BB   | 0.1185      | 975.40234    | 125.68806    | 4.2615  |
| 2      | 7.389         | BB   | 0.1603      | 2.19135e4    | 2125.99561   | 95.7385 |

Totals : 2.28889e4 2251.68366

Signal 4: DAD1 D, Sig=280,4 Ref=360,100

| Peak # | RetTime [min] | Type | Width [min] | Area [mAU*s] | Height [mAU] | Area %  |
|--------|---------------|------|-------------|--------------|--------------|---------|
| 1      | 6.101         | BB   | 0.1171      | 60.14719     | 7.87868      | 4.0573  |
| 2      | 7.389         | BB   | 0.1512      | 1422.28430   | 144.01433    | 95.9427 |

Totals : 1482.43150 151.89301

Signal 5: DAD1 E, Sig=310,4 Ref=360,100

\*\*\* End of Report \*\*\*

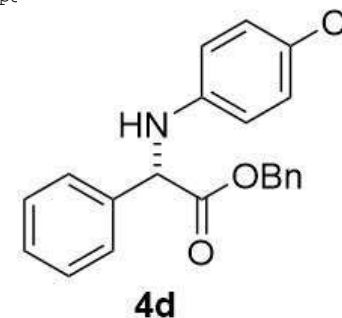

enantioenriched



```

=====
Acq. Operator   :                               Seq. Line :   34
Acq. Instrument : Instrument 1                   Location  : Vial 59
Injection Date  : 10/8/2020 10:48:11 PM         Inj       :    1
                                                Inj Volume: 5.000 µl
Different Inj Volume from Sequence ! Actual Inj Volume : 3.000 µl
Acq. Method     : C:\CHEM32\1\DATA\QDY 2020-10-08 10-40-29\IC-05-30.M
Last changed    : 10/8/2020 10:58:55 PM         (modified after loading)
Analysis Method  : C:\CHEM32\1\METHODS\IC-10-10.M
Last changed    : 10/8/2020 11:20:53 PM         (modified after loading)
Additional Info  : Peak(s) manually integrated
    
```

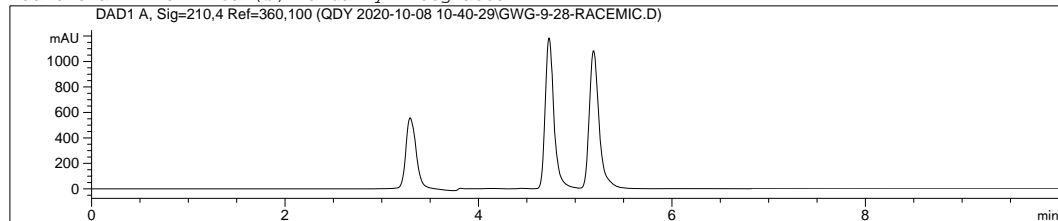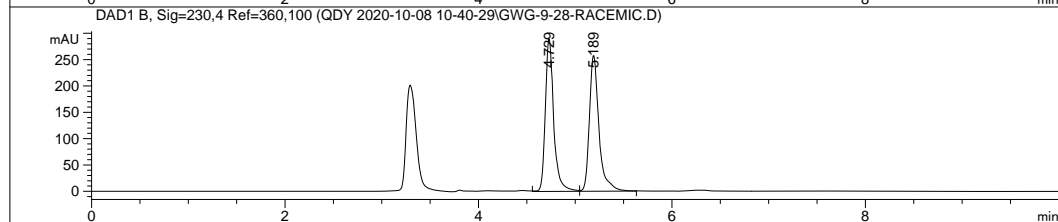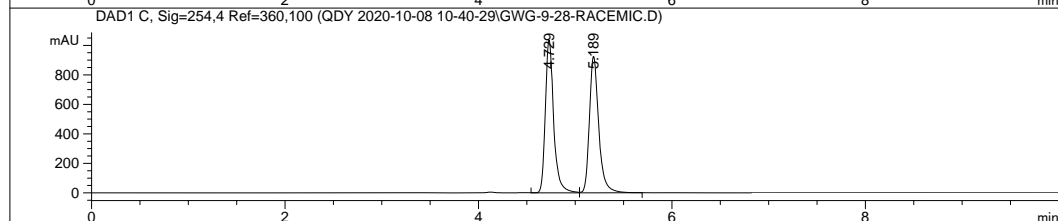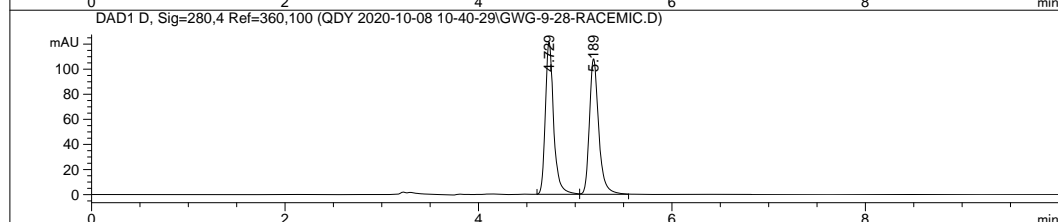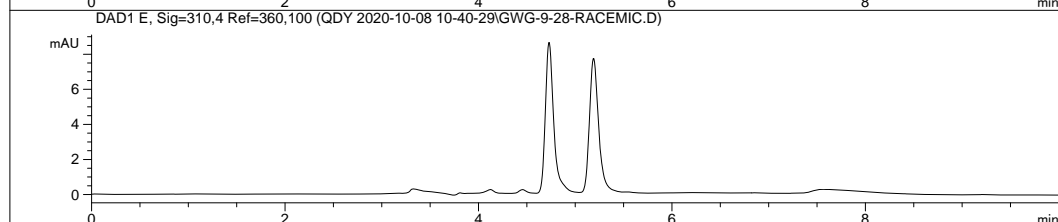

```

=====
                          Area Percent Report
=====
Sorted By      :      Signal
Multiplier    :      1.0000
Dilution      :      1.0000
Use Multiplier & Dilution Factor with ISTDs
    
```

Signal 1: DAD1 A, Sig=210,4 Ref=360,100

Signal 2: DAD1 B, Sig=230,4 Ref=360,100

| Peak # | RetTime [min] | Type | Width [min] | Area [mAU*s] | Height [mAU] | Area %  |
|--------|---------------|------|-------------|--------------|--------------|---------|
| 1      | 4.729         | VV   | 0.0901      | 1744.07788   | 290.20261    | 49.6506 |
| 2      | 5.189         | VB   | 0.1039      | 1768.62781   | 258.12665    | 50.3494 |

Totals : 3512.70569 548.32925

Signal 3: DAD1 C, Sig=254,4 Ref=360,100

| Peak # | RetTime [min] | Type | Width [min] | Area [mAU*s] | Height [mAU] | Area %  |
|--------|---------------|------|-------------|--------------|--------------|---------|
| 1      | 4.729         | VV   | 0.0896      | 6196.54443   | 1038.50464   | 50.0116 |
| 2      | 5.189         | VB   | 0.1020      | 6193.66455   | 926.55438    | 49.9884 |

Totals : 1.23902e4 1965.05902

Signal 4: DAD1 D, Sig=280,4 Ref=360,100

| Peak # | RetTime [min] | Type | Width [min] | Area [mAU*s] | Height [mAU] | Area %  |
|--------|---------------|------|-------------|--------------|--------------|---------|
| 1      | 4.729         | BV   | 0.0892      | 721.46814    | 121.59039    | 50.0470 |
| 2      | 5.189         | VB   | 0.1016      | 720.11432    | 108.26495    | 49.9530 |

Totals : 1441.58246 229.85534

Signal 5: DAD1 E, Sig=310,4 Ref=360,100

\*\*\* End of Repo: \*\*\*

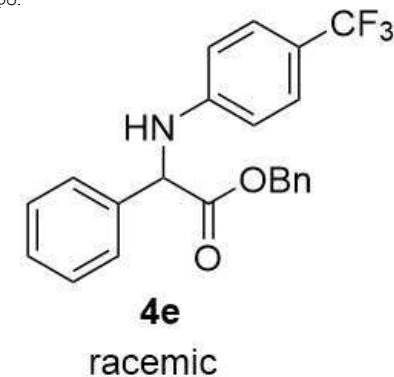

```

=====
Acq. Operator   :                               Seq. Line :   36
Acq. Instrument : Instrument 1                   Location  : Vial 60
Injection Date  : 10/8/2020 11:13:11 PM         Inj       :    1
                                                Inj Volume: 5.000 µl
Different Inj Volume from Sequence ! Actual Inj Volume : 3.000 µl
Acq. Method    : C:\CHEM32\1\DATA\QDY 2020-10-08 10-40-29\IC-05-10.M
Last changed   : 11/7/2016 7:56:52 PM
Analysis Method: C:\CHEM32\1\METHODS\IC-10-10.M
Last changed   : 10/8/2020 11:20:53 PM
                (modified after loading)
    
```

Additional Info : Peak(s) manually integrated

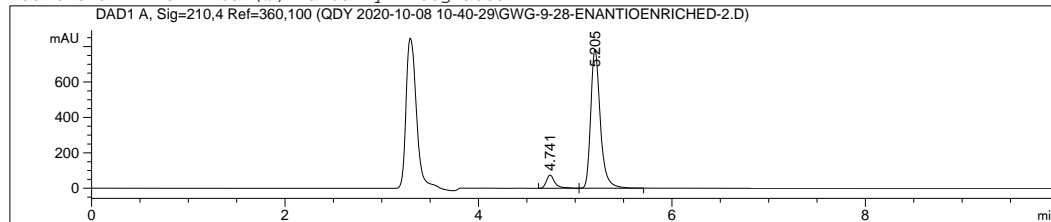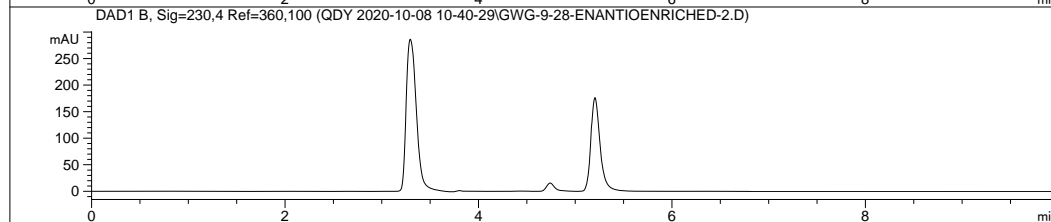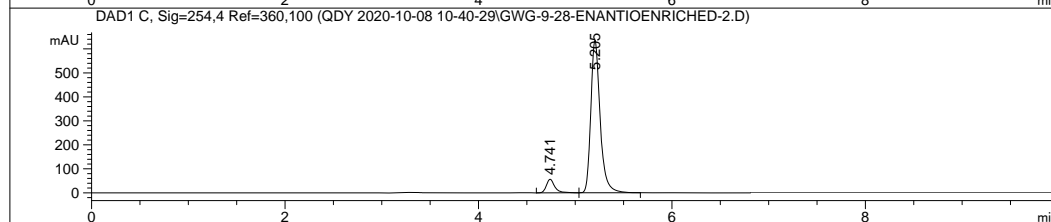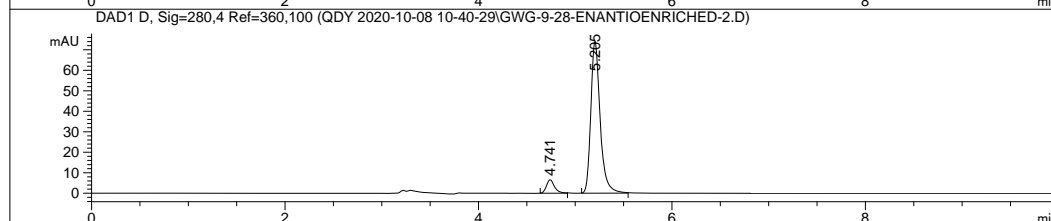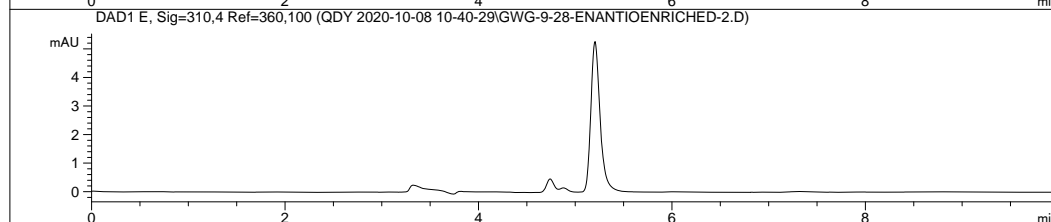

Area Percent Report

```

=====
Sorted By      :      Signal
Multiplier     :      1.0000
Dilution      :      1.0000
Use Multiplier & Dilution Factor with ISTDs
    
```

Signal 1: DAD1 A, Sig=210,4 Ref=360,100

| Peak # | RetTime [min] | Type | Width [min] | Area [mAU*s] | Height [mAU] | Area %  |
|--------|---------------|------|-------------|--------------|--------------|---------|
| 1      | 4.741         | BV   | 0.0926      | 452.51440    | 74.78878     | 7.7596  |
| 2      | 5.205         | VB   | 0.1040      | 5379.14209   | 784.04279    | 92.2404 |

Totals : 5831.65649 858.83157

Signal 2: DAD1 B, Sig=230,4 Ref=360,100

Signal 3: DAD1 C, Sig=254,4 Ref=360,100

| Peak # | RetTime [min] | Type | Width [min] | Area [mAU*s] | Height [mAU] | Area %  |
|--------|---------------|------|-------------|--------------|--------------|---------|
| 1      | 4.741         | VV   | 0.0918      | 338.96918    | 56.67956     | 7.3739  |
| 2      | 5.205         | VB   | 0.1020      | 4257.90576   | 636.47284    | 92.6261 |

Totals : 4596.87494 693.15240

Signal 4: DAD1 D, Sig=280,4 Ref=360,100

| Peak # | RetTime [min] | Type | Width [min] | Area [mAU*s] | Height [mAU] | Area %  |
|--------|---------------|------|-------------|--------------|--------------|---------|
| 1      | 4.741         | BB   | 0.0899      | 38.19249     | 6.56289      | 7.1650  |
| 2      | 5.205         | BB   | 0.1019      | 494.84897    | 74.13846     | 92.8350 |

Totals : 533.04146 80.70135

Signal 5: DAD1 E, Sig=310,4 Ref=360,100

\*\*\* End of Report

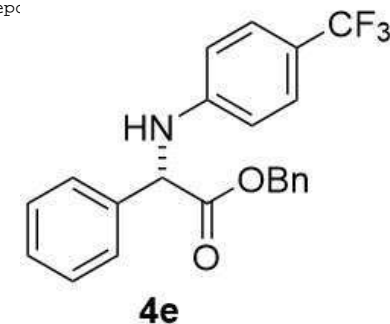

enantioenriched

```

=====
Acq. Operator   :                               Seq. Line :    6
Acq. Instrument : Instrument 1                   Location  : Vial 51
Injection Date  : 10/16/2020 1:05:22 PM         Inj       :    1
                                                Inj Volume: 5.000 µl
Different Inj Volume from Sequence ! Actual Inj Volume : 3.000 µl
Acq. Method    : C:\CHEM32\1\DATA\QDY 2020-10-16 10-49-26\AD-10-40.M
Last changed   : 10/16/2020 1:45:49 PM
                (modified after loading)
Analysis Method: C:\CHEM32\1\METHODS\IC-10-10.M
Last changed   : 10/16/2020 2:40:18 PM
                (modified after loading)
Additional Info : Peak(s) manually integrated
  
```

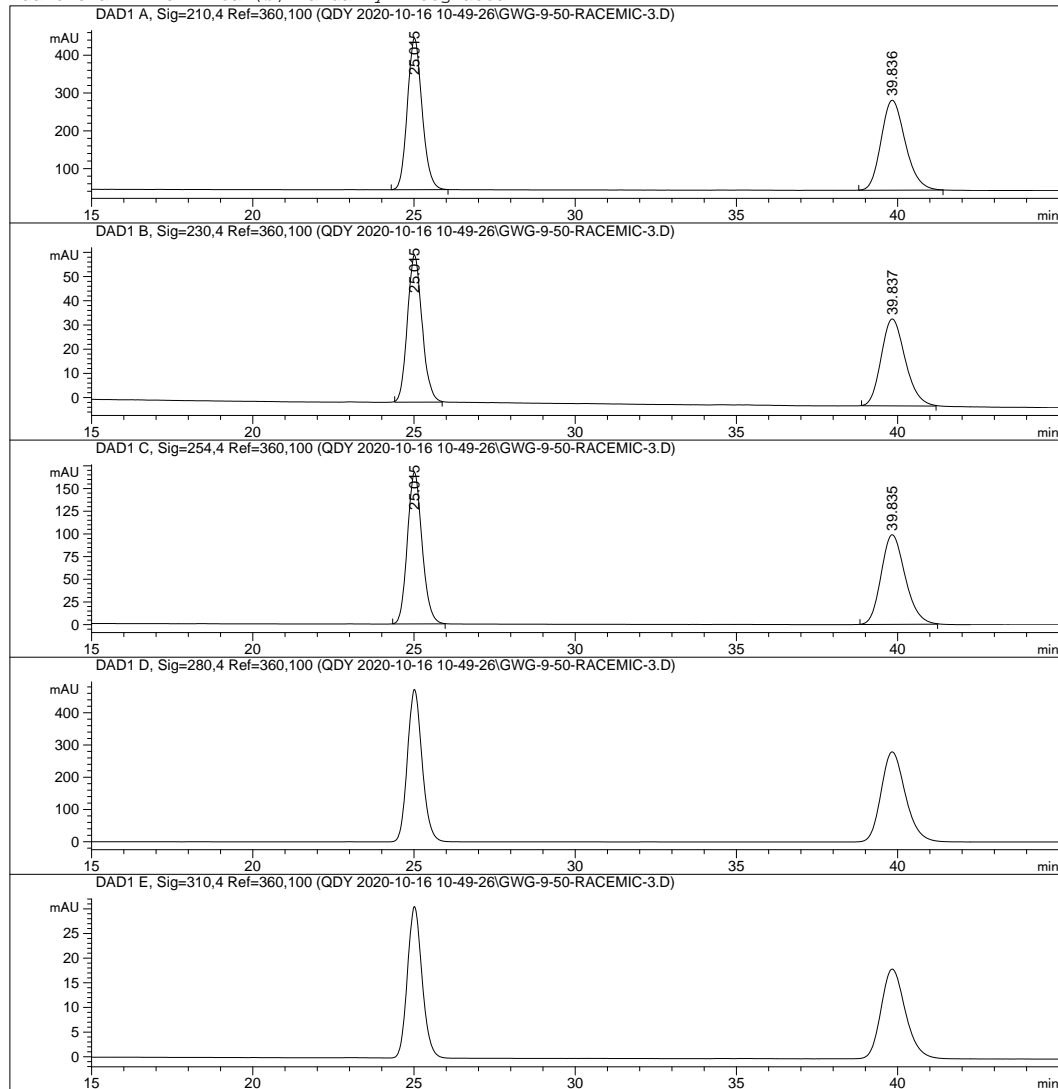

```

=====
                          Area Percent Report
=====
Sorted By      :      Signal
Multiplier    :      1.0000
Dilution      :      1.0000
Use Multiplier & Dilution Factor with ISTDs
  
```

Signal 1: DAD1 A, Sig=210,4 Ref=360,100

| Peak # | RetTime [min] | Type | Width [min] | Area [mAU*s] | Height [mAU] | Area %  |
|--------|---------------|------|-------------|--------------|--------------|---------|
| 1      | 25.015        | BB   | 0.4883      | 1.27346e4    | 401.24127    | 50.6222 |
| 2      | 39.836        | BB   | 0.8091      | 1.24215e4    | 237.90660    | 49.3778 |

Totals : 2.51561e4 639.14787

Signal 2: DAD1 B, Sig=230,4 Ref=360,100

| Peak # | RetTime [min] | Type | Width [min] | Area [mAU*s] | Height [mAU] | Area %  |
|--------|---------------|------|-------------|--------------|--------------|---------|
| 1      | 25.015        | BB   | 0.4871      | 1921.54822   | 60.73598     | 50.7475 |
| 2      | 39.837        | BB   | 0.8056      | 1864.94275   | 35.92773     | 49.2525 |

Totals : 3786.49097 96.66372

Signal 3: DAD1 C, Sig=254,4 Ref=360,100

| Peak # | RetTime [min] | Type | Width [min] | Area [mAU*s] | Height [mAU] | Area %  |
|--------|---------------|------|-------------|--------------|--------------|---------|
| 1      | 25.015        | BB   | 0.4869      | 5284.96729   | 167.14244    | 50.7601 |
| 2      | 39.835        | BB   | 0.8037      | 5126.69922   | 98.75027     | 49.2399 |

Totals : 1.04117e4 265.89272

Signal 4: DAD1 D, Sig=280,4 Ref=360,100

Signal 5: DAD1 E, Sig=310,4 Ref=360,100

\*\*\* End of Re

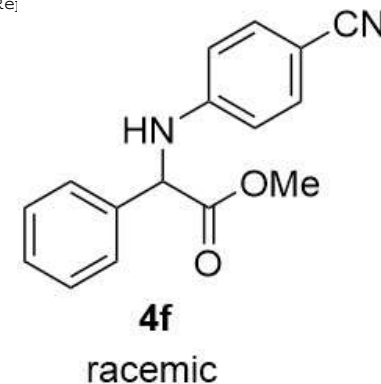

```

=====
Acq. Operator   :                               Seq. Line :    7
Acq. Instrument : Instrument 1                   Location  : Vial 52
Injection Date  : 10/16/2020 1:51:21 PM         Inj       :    1
                                                Inj Volume: 5.000 µl
Different Inj Volume from Sequence ! Actual Inj Volume : 3.000 µl
Acq. Method    : C:\CHEM32\1\DATA\QDY 2020-10-16 10-49-26\AD-10-40.M
Last changed   : 10/16/2020 1:45:49 PM         (modified after loading)
Analysis Method: C:\CHEM32\1\METHODS\IC-10-10.M
Last changed   : 10/16/2020 2:40:18 PM         (modified after loading)
Additional Info : Peak(s) manually integrated
  
```

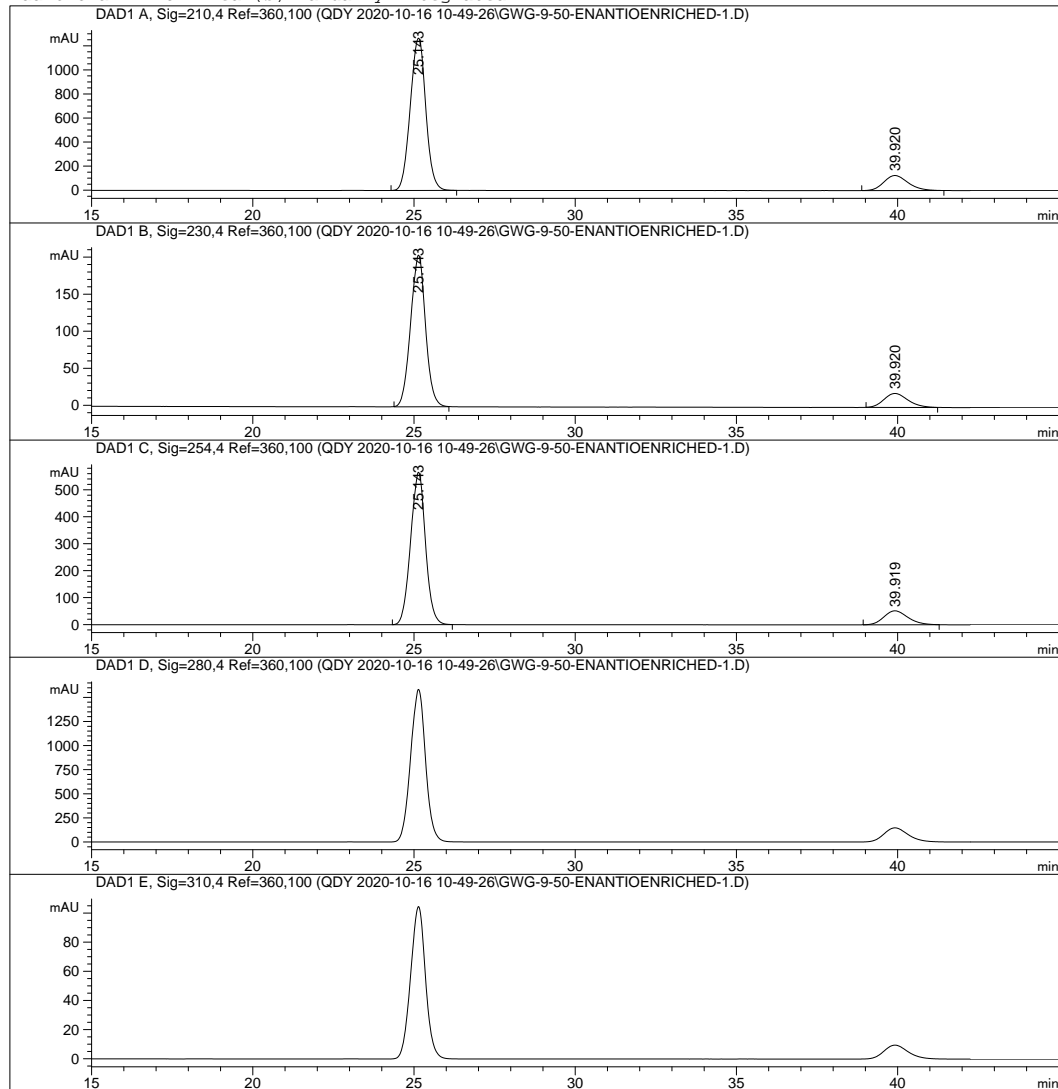

```

=====
                          Area Percent Report
=====
Sorted By      :      Signal
Multiplier    :      1.0000
Dilution      :      1.0000
Use Multiplier & Dilution Factor with ISTDs
  
```

Signal 1: DAD1 A, Sig=210,4 Ref=360,100

| Peak # | RetTime [min] | Type | Width [min] | Area [mAU*s] | Height [mAU] | Area %  |
|--------|---------------|------|-------------|--------------|--------------|---------|
| 1      | 25.143        | BB   | 0.5213      | 4.22752e4    | 1266.79663   | 86.5899 |
| 2      | 39.920        | BB   | 0.8041      | 6547.10840   | 125.20229    | 13.4101 |

Totals : 4.88223e4 1391.99892

Signal 2: DAD1 B, Sig=230,4 Ref=360,100

| Peak # | RetTime [min] | Type | Width [min] | Area [mAU*s] | Height [mAU] | Area %  |
|--------|---------------|------|-------------|--------------|--------------|---------|
| 1      | 25.143        | BB   | 0.4979      | 6590.59668   | 204.57591    | 87.1296 |
| 2      | 39.920        | BB   | 0.7873      | 973.53345    | 18.82525     | 12.8704 |

Totals : 7564.13013 223.40117

Signal 3: DAD1 C, Sig=254,4 Ref=360,100

| Peak # | RetTime [min] | Type | Width [min] | Area [mAU*s] | Height [mAU] | Area %  |
|--------|---------------|------|-------------|--------------|--------------|---------|
| 1      | 25.143        | BB   | 0.4976      | 1.81984e4    | 565.31354    | 87.1024 |
| 2      | 39.919        | BB   | 0.8030      | 2694.72119   | 51.79638     | 12.8976 |

Totals : 2.08931e4 617.10992

Signal 4: DAD1 D, Sig=280,4 Ref=360,100

Signal 5: DAD1 E, Sig=310,4 Ref=360,100

\*\*\* End of Rep

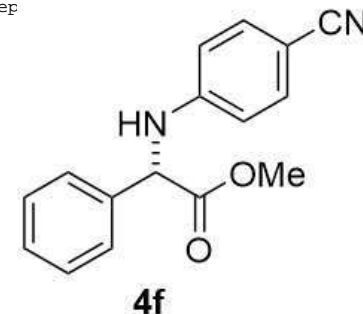

enantioenriched

```

=====
Acq. Operator   :                               Seq. Line :   10
Acq. Instrument : Instrument 1                  Location  : Vial 53
Injection Date  : 10/12/2020 12:45:22 PM      Inj       :    1
                                                Inj Volume: 5.000 µl
Different Inj Volume from Sequence !      Actual Inj Volume : 3.000 µl
Acq. Method    : C:\CHEM32\1\DATA\QDY 2020-10-12 10-14-17\AD-10-40.M
Last changed   : 10/12/2020 12:44:30 PM      (modified after loading)
Analysis Method : C:\CHEM32\1\METHODS\IC-10-10.M
Last changed   : 10/12/2020 6:50:23 PM      (modified after loading)
Additional Info : Peak(s) manually integrated
  
```

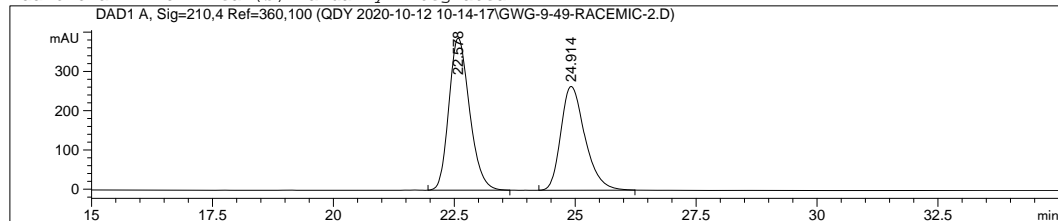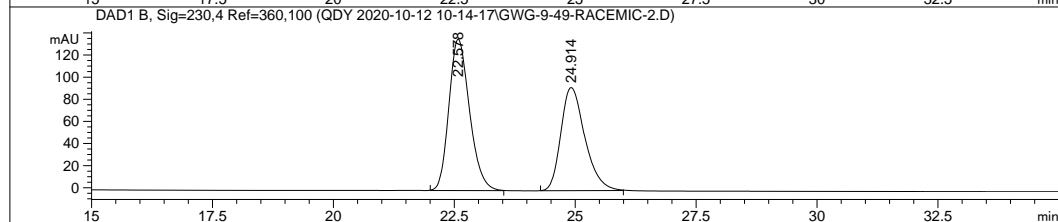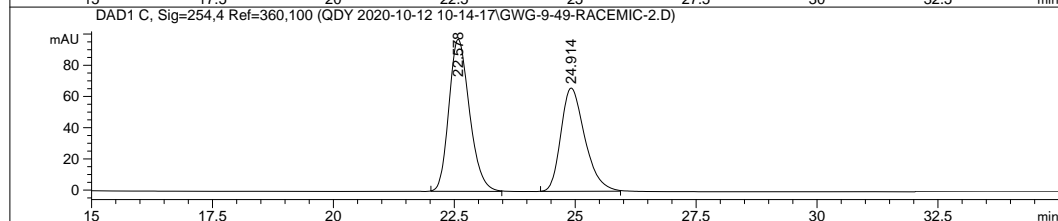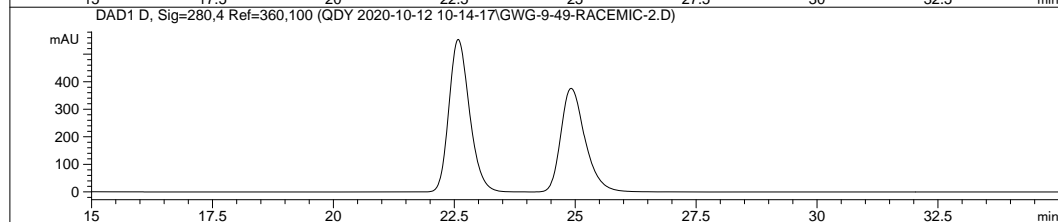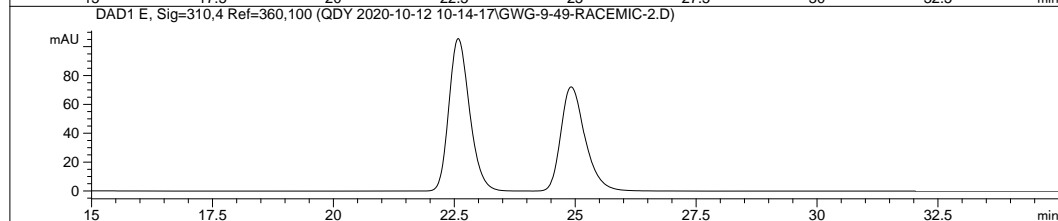

```

=====
                          Area Percent Report
=====
Sorted By      :      Signal
Multiplier     :      1.0000
Dilution      :      1.0000
Use Multiplier & Dilution Factor with ISTDs
  
```

Signal 1: DAD1 A, Sig=210,4 Ref=360,100

| Peak # | RetTime [min] | Type | Width [min] | Area [mAU*s] | Height [mAU] | Area %  |
|--------|---------------|------|-------------|--------------|--------------|---------|
| 1      | 22.578        | BB   | 0.4582      | 1.14975e4    | 387.41354    | 55.6122 |
| 2      | 24.914        | BB   | 0.5303      | 9176.86816   | 264.80151    | 44.3878 |

Totals : 2.06743e4 652.21506

Signal 2: DAD1 B, Sig=230,4 Ref=360,100

| Peak # | RetTime [min] | Type | Width [min] | Area [mAU*s] | Height [mAU] | Area %  |
|--------|---------------|------|-------------|--------------|--------------|---------|
| 1      | 22.578        | BB   | 0.4598      | 4057.88281   | 136.88879    | 55.7477 |
| 2      | 24.914        | BB   | 0.5283      | 3221.13623   | 93.42260     | 44.2523 |

Totals : 7279.01904 230.31139

Signal 3: DAD1 C, Sig=254,4 Ref=360,100

| Peak # | RetTime [min] | Type | Width [min] | Area [mAU*s] | Height [mAU] | Area %  |
|--------|---------------|------|-------------|--------------|--------------|---------|
| 1      | 22.578        | BB   | 0.4545      | 2877.55908   | 97.44232     | 55.8395 |
| 2      | 24.914        | BB   | 0.5270      | 2275.71240   | 66.20918     | 44.1605 |

Totals : 5153.27148 163.65150

Signal 4: DAD1 D, Sig=280,4 Ref=360,100

Signal 5: DAD1 E, Sig=310,4 Ref=360,100

\*\*\* End of Report \*\*\*

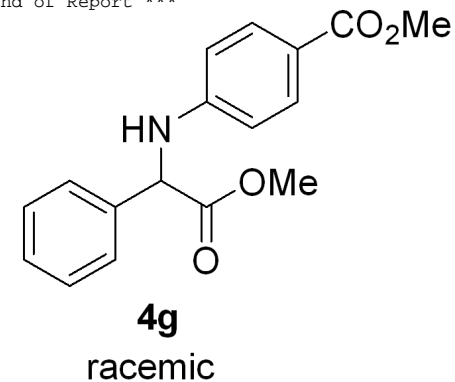

```

=====
Acq. Operator   :                               Seq. Line : 11
Acq. Instrument : Instrument 1                   Location  : Vial 54
Injection Date  : 10/12/2020 1:26:23 PM         Inj       : 1
                                                Inj Volume: 5.000 µl
Different Inj Volume from Sequence ! Actual Inj Volume : 3.000 µl
Acq. Method    : C:\CHEM32\1\DATA\QDY 2020-10-12 10-14-17\AD-10-40.M
Last changed   : 10/12/2020 12:44:30 PM
                (modified after loading)
Analysis Method: C:\CHEM32\1\METHODS\IC-10-10.M
Last changed   : 10/12/2020 6:50:23 PM
                (modified after loading)
Additional Info : Peak(s) manually integrated
    
```

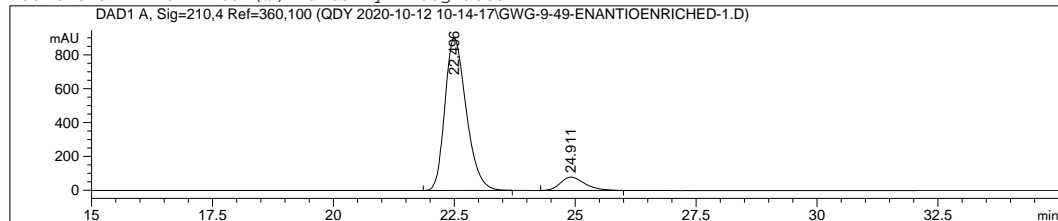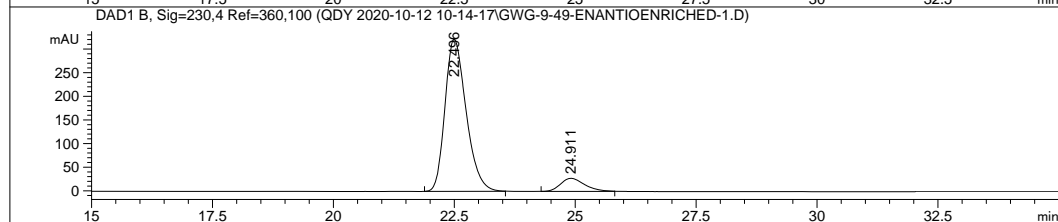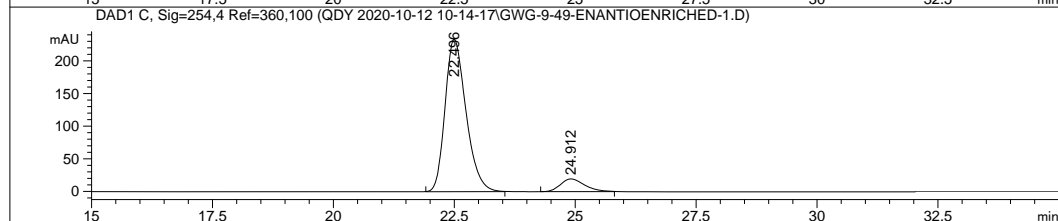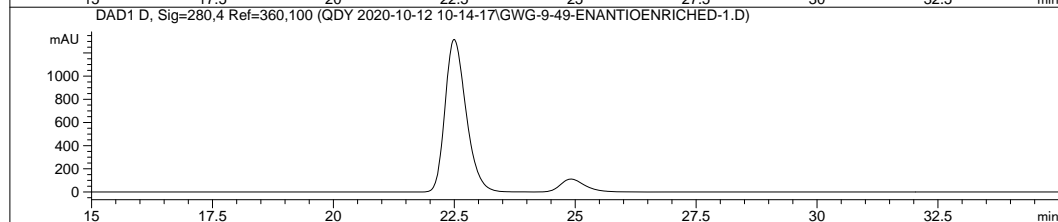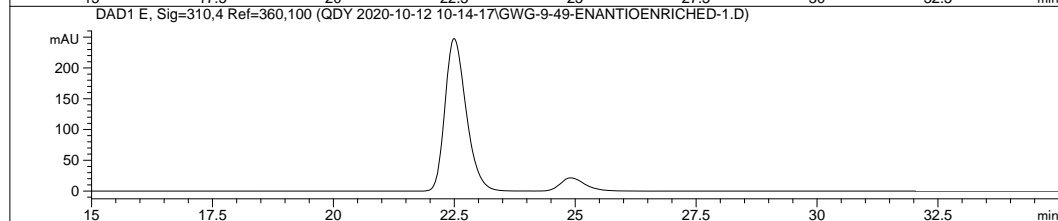

```

=====
                          Area Percent Report
=====
Sorted By      :      Signal
Multiplier     :      1.0000
Dilution      :      1.0000
Use Multiplier & Dilution Factor with ISTDs
    
```

Signal 1: DAD1 A, Sig=210,4 Ref=360,100

| Peak # | RetTime [min] | Type | Width [min] | Area [mAU*s] | Height [mAU] | Area %  |
|--------|---------------|------|-------------|--------------|--------------|---------|
| 1      | 22.496        | BB   | 0.4754      | 2.75897e4    | 900.68878    | 90.9044 |
| 2      | 24.911        | BB   | 0.5303      | 2760.54858   | 78.87841     | 9.0956  |

Totals : 3.03503e4 979.56719

Signal 2: DAD1 B, Sig=230,4 Ref=360,100

| Peak # | RetTime [min] | Type | Width [min] | Area [mAU*s] | Height [mAU] | Area %  |
|--------|---------------|------|-------------|--------------|--------------|---------|
| 1      | 22.496        | BB   | 0.4686      | 9791.88379   | 322.19498    | 91.0701 |
| 2      | 24.911        | BB   | 0.5295      | 960.14453    | 27.75984     | 8.9299  |

Totals : 1.07520e4 349.95481

Signal 3: DAD1 C, Sig=254,4 Ref=360,100

| Peak # | RetTime [min] | Type | Width [min] | Area [mAU*s] | Height [mAU] | Area %  |
|--------|---------------|------|-------------|--------------|--------------|---------|
| 1      | 22.496        | BB   | 0.4633      | 7030.71533   | 233.49910    | 91.2297 |
| 2      | 24.912        | BB   | 0.5332      | 675.89557    | 19.55760     | 8.7703  |

Totals : 7706.61090 253.05670

Signal 4: DAD1 D, Sig=280,4 Ref=360,100

Signal 5: DAD1 E, Sig=310,4 Ref=360,100

\*\*\* End of Report \*\*\*

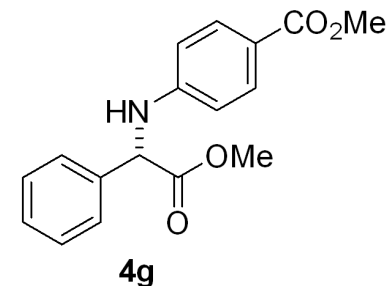

Sample Name:

```

=====
Acq. Operator   :                               Seq. Line :    5
Acq. Instrument : Instrument 1                   Location  : Vial 53
Injection Date  : 10/2/2020 12:31:59 AM         Inj       :    1
                                                Inj Volume: 5.000 µl
Different Inj Volume from Sequence ! Actual Inj Volume : 3.000 µl
Acq. Method    : C:\CHEM32\1\DATA\QDY 2020-10-01 23-38-16\IC-05-30.M
Last changed   : 10/2/2020 12:34:21 AM         (modified after loading)
Analysis Method: C:\CHEM32\1\METHODS\IC-10-10.M
Last changed   : 10/2/2020 12:28:20 PM         (modified after loading)
Additional Info : Peak(s) manually integrated

```

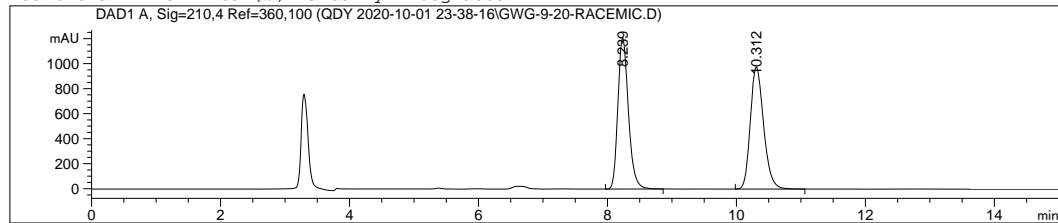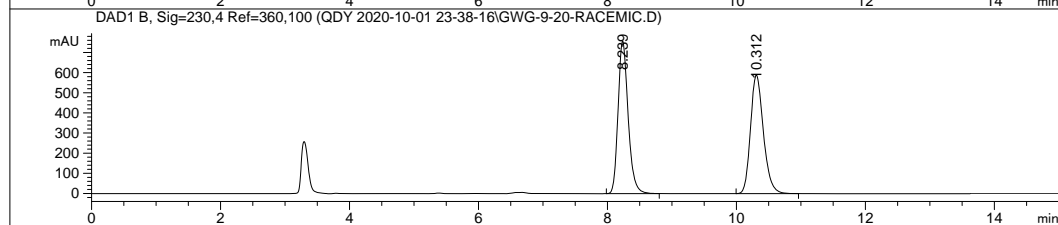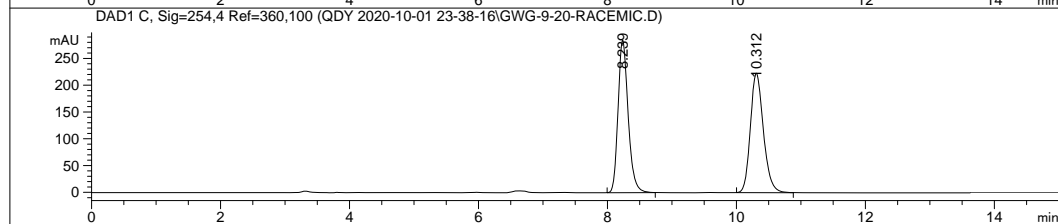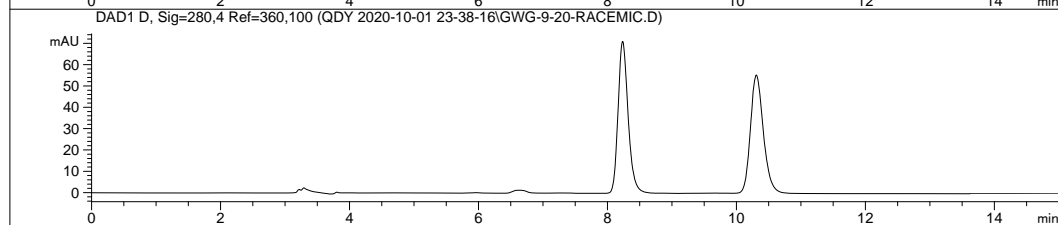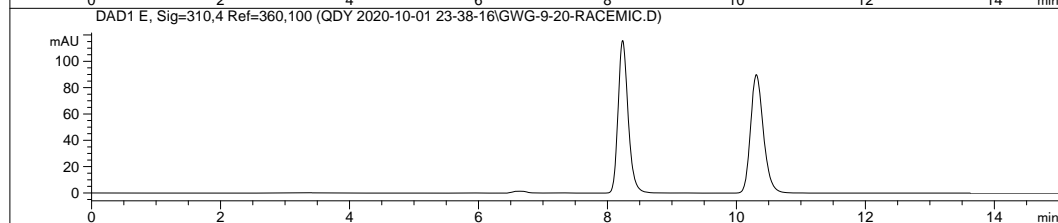

Sample Name:

```

=====
                          Area Percent Report
=====
Sorted By      :      Signal
Multiplier    :      1.0000
Dilution      :      1.0000
Use Multiplier & Dilution Factor with ISTDs

```

Signal 1: DAD1 A, Sig=210,4 Ref=360,100

| Peak # | RetTime [min] | Type | Width [min] | Area [mAU*s] | Height [mAU] | Area %  |
|--------|---------------|------|-------------|--------------|--------------|---------|
| 1      | 8.239         | BB   | 0.1761      | 1.36750e4    | 1207.74634   | 49.5051 |
| 2      | 10.312        | BB   | 0.2227      | 1.39485e4    | 976.15674    | 50.4949 |

Totals : 2.76235e4 2183.90308

Signal 2: DAD1 B, Sig=230,4 Ref=360,100

| Peak # | RetTime [min] | Type | Width [min] | Area [mAU*s] | Height [mAU] | Area %  |
|--------|---------------|------|-------------|--------------|--------------|---------|
| 1      | 8.239         | BB   | 0.1664      | 8206.73047   | 757.46893    | 50.0969 |
| 2      | 10.312        | BB   | 0.2137      | 8174.97217   | 589.74353    | 49.9031 |

Totals : 1.63817e4 1347.21246

Signal 3: DAD1 C, Sig=254,4 Ref=360,100

| Peak # | RetTime [min] | Type | Width [min] | Area [mAU*s] | Height [mAU] | Area %  |
|--------|---------------|------|-------------|--------------|--------------|---------|
| 1      | 8.239         | BB   | 0.1668      | 3095.15210   | 284.72644    | 49.7490 |
| 2      | 10.312        | BB   | 0.2155      | 3126.38110   | 223.12772    | 50.2510 |

Totals : 6221.53320 507.85416

Signal 4: DAD1 D, Sig=280,4 Ref=360,100

Signal 5: DAD1 E, Sig=310,4 Ref=360,100

\*\*\* End of Report \*\*\*

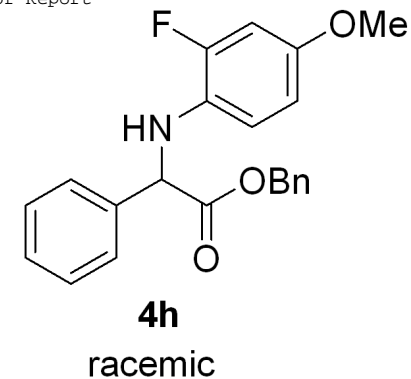

```

=====
Acq. Operator   :                               Seq. Line :    6
Acq. Instrument : Instrument 1                   Location  : Vial 54
Injection Date  : 10/2/2020 1:02:59 AM          Inj       :    1
                                                Inj Volume: 5.000 µl
Different Inj Volume from Sequence ! Actual Inj Volume : 3.000 µl
Acq. Method    : C:\CHEM32\1\DATA\QDY 2020-10-01 23-38-16\IC-05-30.M
Last changed   : 10/2/2020 12:34:21 AM
                (modified after loading)
Analysis Method: C:\CHEM32\1\METHODS\IC-10-10.M
Last changed   : 10/2/2020 12:28:20 PM
                (modified after loading)
Additional Info : Peak(s) manually integrated
  
```

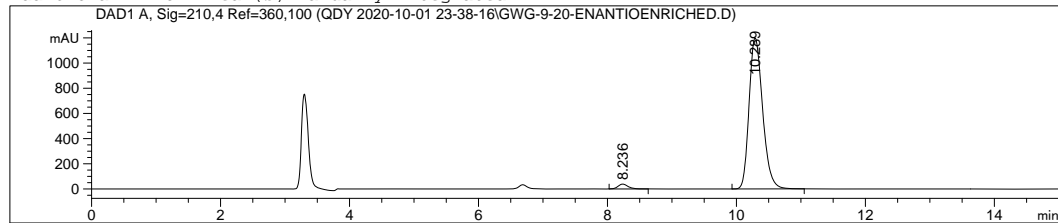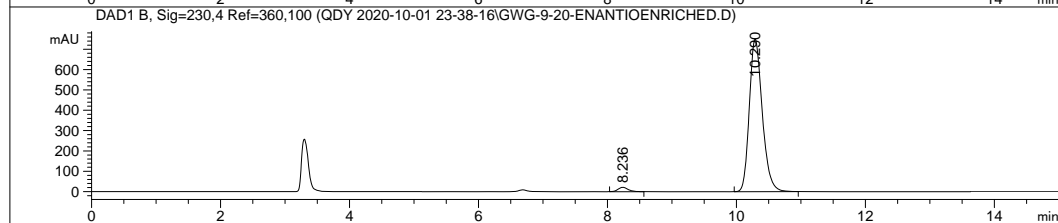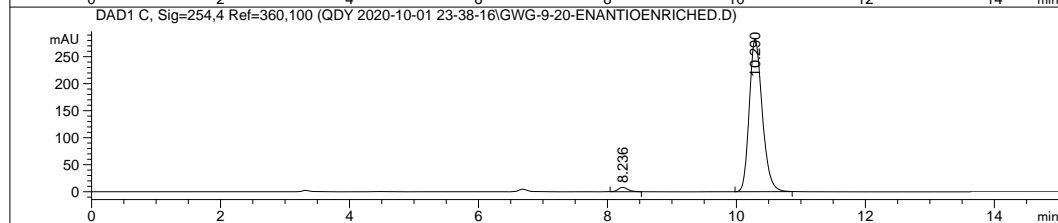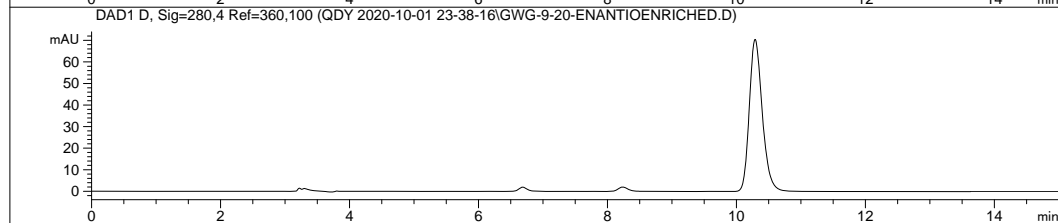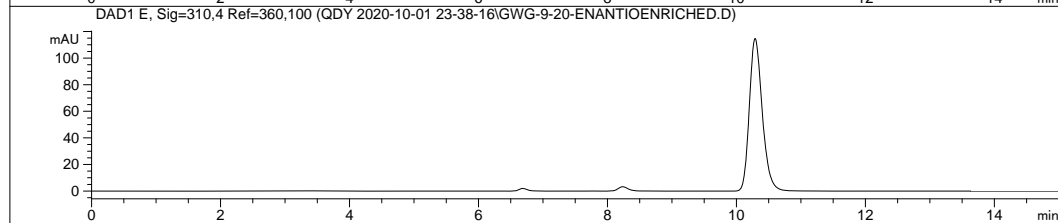

```

=====
                          Area Percent Report
=====
Sorted By      :      Signal
Multiplier     :      1.0000
Dilution       :      1.0000
Use Multiplier & Dilution Factor with ISTDs
  
```

Signal 1: DAD1 A, Sig=210,4 Ref=360,100

| Peak # | RetTime [min] | Type | Width [min] | Area [mAU*s] | Height [mAU] | Area %  |
|--------|---------------|------|-------------|--------------|--------------|---------|
| 1      | 8.236         | BB   | 0.1671      | 422.43765    | 38.78504     | 2.3595  |
| 2      | 10.289        | BB   | 0.2261      | 1.74811e4    | 1198.86145   | 97.6405 |

Totals : 1.79035e4 1237.64649

Signal 2: DAD1 B, Sig=230,4 Ref=360,100

| Peak # | RetTime [min] | Type | Width [min] | Area [mAU*s] | Height [mAU] | Area %  |
|--------|---------------|------|-------------|--------------|--------------|---------|
| 1      | 8.236         | BB   | 0.1657      | 232.87108    | 21.61278     | 2.1774  |
| 2      | 10.290        | BB   | 0.2147      | 1.04619e4    | 750.01025    | 97.8226 |

Totals : 1.06948e4 771.62303

Signal 3: DAD1 C, Sig=254,4 Ref=360,100

| Peak # | RetTime [min] | Type | Width [min] | Area [mAU*s] | Height [mAU] | Area %  |
|--------|---------------|------|-------------|--------------|--------------|---------|
| 1      | 8.236         | BB   | 0.1653      | 88.54564     | 8.24537      | 2.1872  |
| 2      | 10.290        | BB   | 0.2156      | 3959.88013   | 282.36038    | 97.8128 |

Totals : 4048.42577 290.60575

Signal 4: DAD1 D, Sig=280,4 Ref=360,100

Signal 5: DAD1 E, Sig=310,4 Ref=360,100

\*\*\* End of Report \*\*\*

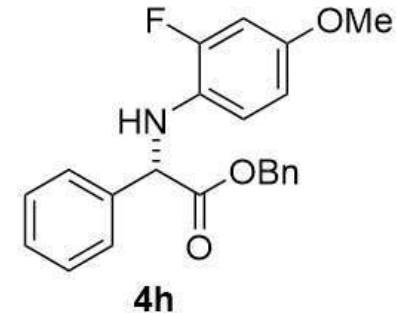

enantioenriched



Sample Name:

```

=====
Acq. Operator   :                               Seq. Line :    3
Acq. Instrument : Instrument 1                   Location  : Vial 51
Injection Date  : 10/2/2020 12:05:59 AM        Inj       :    1
                                                Inj Volume: 5.000 µl
Different Inj Volume from Sequence ! Actual Inj Volume : 3.000 µl
Acq. Method    : C:\CHEM32\1\DATA\QDY 2020-10-01 23-38-16\IC-05-30.M
Last changed   : 10/1/2020 11:51:25 PM
                                                (modified after loading)
Analysis Method: C:\CHEM32\1\METHODS\IC-10-10.M
Last changed   : 6/25/2018 2:48:18 PM
Additional Info : Peak(s) manually integrated
  
```

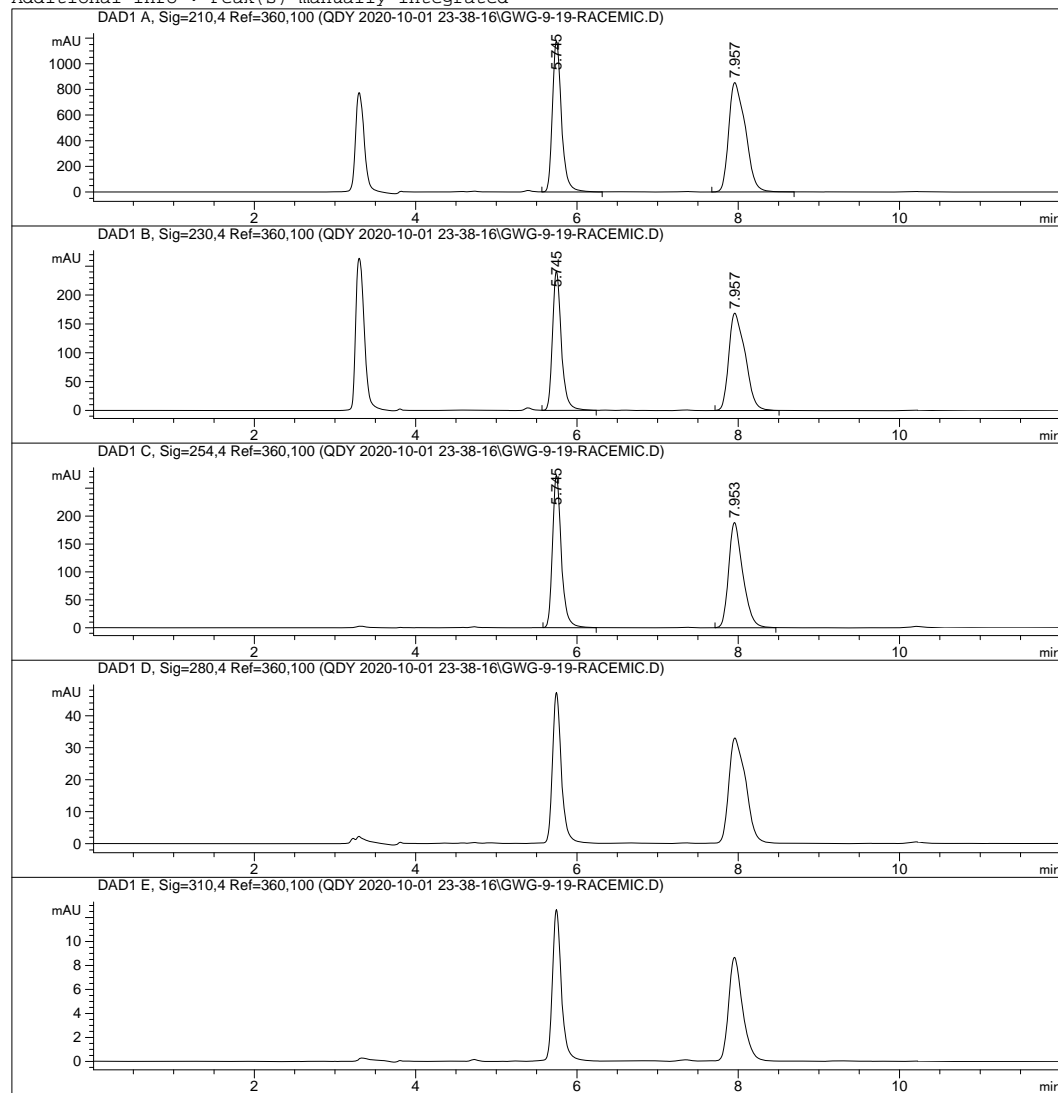

Sample Name:

```

=====
                          Area Percent Report
=====
Sorted By      :      Signal
Multiplier    :      1.0000
Dilution      :      1.0000
Use Multiplier & Dilution Factor with ISTDs
  
```

Signal 1: DAD1 A, Sig=210,4 Ref=360,100

| Peak # | RetTime [min] | Type | Width [min] | Area [mAU*s] | Height [mAU] | Area %  |
|--------|---------------|------|-------------|--------------|--------------|---------|
| 1      | 5.745         | VB   | 0.1192      | 9196.11426   | 1176.98865   | 43.0290 |
| 2      | 7.957         | BB   | 0.2025      | 1.21758e4    | 853.03387    | 56.9710 |

Totals : 2.13719e4 2030.02252

Signal 2: DAD1 B, Sig=230,4 Ref=360,100

| Peak # | RetTime [min] | Type | Width [min] | Area [mAU*s] | Height [mAU] | Area %  |
|--------|---------------|------|-------------|--------------|--------------|---------|
| 1      | 5.745         | VB   | 0.1147      | 1835.49182   | 241.52768    | 43.5927 |
| 2      | 7.957         | BB   | 0.2001      | 2375.05396   | 168.86989    | 56.4073 |

Totals : 4210.54578 410.39757

Signal 3: DAD1 C, Sig=254,4 Ref=360,100

| Peak # | RetTime [min] | Type | Width [min] | Area [mAU*s] | Height [mAU] | Area %  |
|--------|---------------|------|-------------|--------------|--------------|---------|
| 1      | 5.745         | BB   | 0.1143      | 2067.83765   | 273.14676    | 47.3651 |
| 2      | 7.953         | BB   | 0.1822      | 2297.90552   | 188.54533    | 52.6349 |

Totals : 4365.74316 461.69209

Signal 4: DAD1 D, Sig=280,4 Ref=360,100

Signal 5: DAD1 E, Sig=310,4 Ref=360,100

\*\*\* End of Report \*\*\*

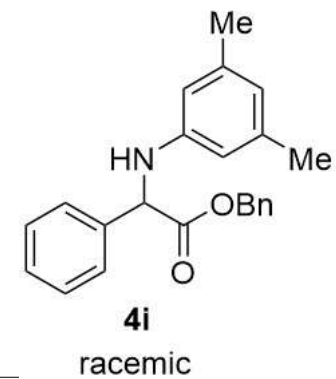

S-233

Sample Name:

```

=====
Acq. Operator   :                               Seq. Line :    4
Acq. Instrument : Instrument 1                   Location  : Vial 52
Injection Date  : 10/2/2020 12:19:00 AM         Inj       :    1
                                                Inj Volume: 5.000 µl
Different Inj Volume from Sequence ! Actual Inj Volume : 3.000 µl
Acq. Method    : C:\CHEM32\1\DATA\QDY 2020-10-01 23-38-16\IC-05-30.M
Last changed   : 10/1/2020 11:51:25 PM
                (modified after loading)
Analysis Method: C:\CHEM32\1\METHODS\IC-10-10.M
Last changed   : 6/25/2018 2:48:18 PM
Additional Info: Peak(s) manually integrated
  
```

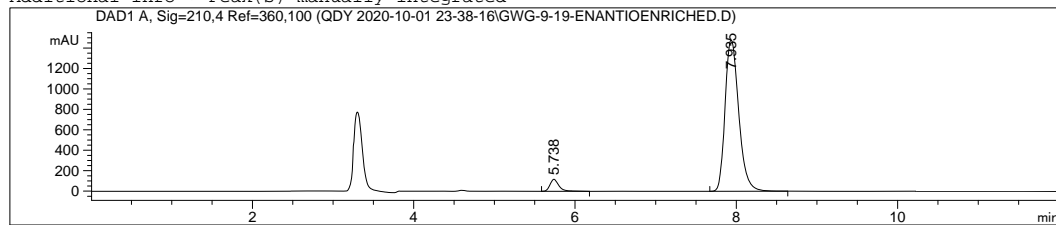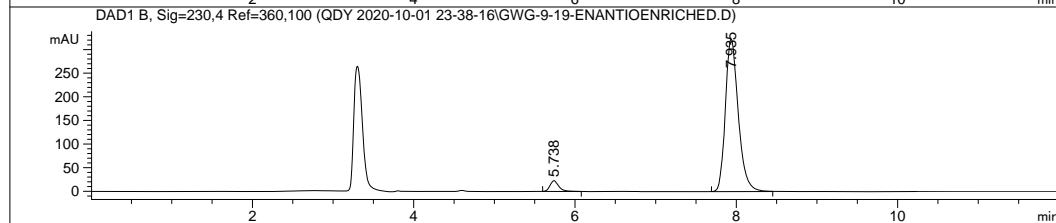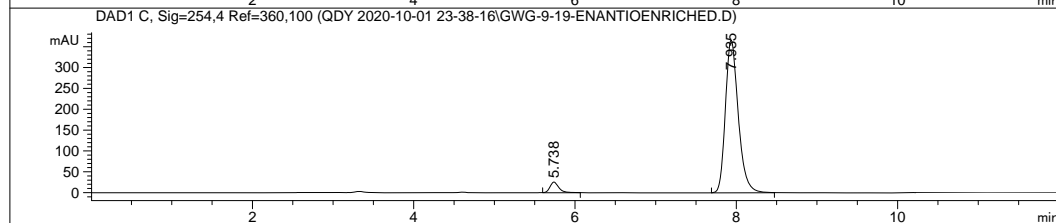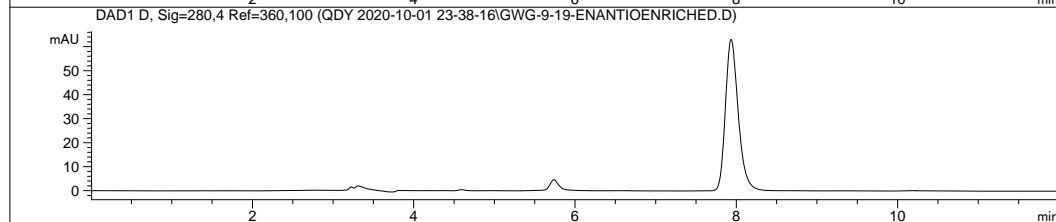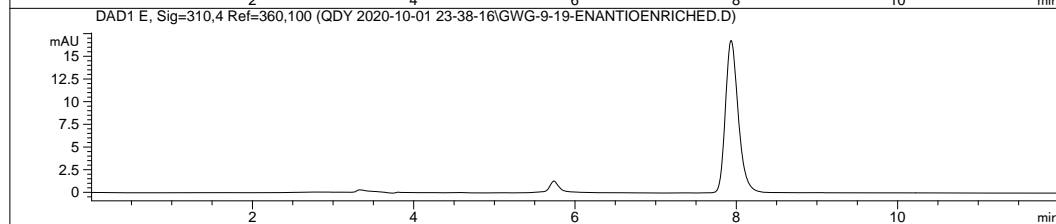

Sample Name:

```

=====
                          Area Percent Report
=====
Sorted By      :      Signal
Multiplier    :      1.0000
Dilution      :      1.0000
Use Multiplier & Dilution Factor with ISTDs
  
```

Signal 1: DAD1 A, Sig=210,4 Ref=360,100

| Peak # | RetTime [min] | Type | Width [min] | Area [mAU*s] | Height [mAU] | Area %  |
|--------|---------------|------|-------------|--------------|--------------|---------|
| 1      | 5.738         | BB   | 0.1149      | 893.60193    | 117.22620    | 4.8829  |
| 2      | 7.935         | BB   | 0.1832      | 1.74071e4    | 1480.24902   | 95.1171 |

Totals : 1.83007e4 1597.47523

Signal 2: DAD1 B, Sig=230,4 Ref=360,100

| Peak # | RetTime [min] | Type | Width [min] | Area [mAU*s] | Height [mAU] | Area %  |
|--------|---------------|------|-------------|--------------|--------------|---------|
| 1      | 5.738         | BB   | 0.1161      | 175.81993    | 22.76503     | 4.6841  |
| 2      | 7.935         | BB   | 0.1692      | 3577.70264   | 322.95239    | 95.3159 |

Totals : 3753.52257 345.71743

Signal 3: DAD1 C, Sig=254,4 Ref=360,100

| Peak # | RetTime [min] | Type | Width [min] | Area [mAU*s] | Height [mAU] | Area %  |
|--------|---------------|------|-------------|--------------|--------------|---------|
| 1      | 5.738         | BB   | 0.1153      | 196.16367    | 25.61747     | 4.6184  |
| 2      | 7.935         | BB   | 0.1691      | 4051.29224   | 366.08670    | 95.3816 |

Totals : 4247.45590 391.70417

Signal 4: DAD1 D, Sig=280,4 Ref=360,100

Signal 5: DAD1 E, Sig=310,4 Ref=360,100

\*\*\* End of Report \*\*\*

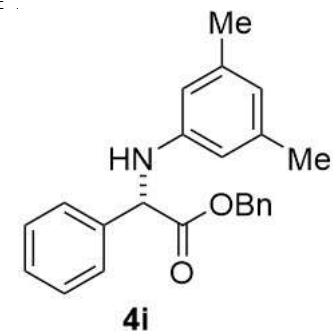

enantioenriched

```

=====
Acq. Operator   :                               Seq. Line :    4
Acq. Instrument : Instrument 1                  Location  : Vial 52
Injection Date  : 10/7/2020 2:36:03 PM        Inj       :    1
                                                Inj Volume: 5.000 µl
Different Inj Volume from Sequence ! Actual Inj Volume : 3.000 µl
Acq. Method    : C:\CHEM32\1\DATA\QDY 2020-10-07 13-31-14\IC-05-30.M
Last changed   : 8/23/2012 1:59:23 PM
Analysis Method: C:\CHEM32\1\METHODS\IC-10-10.M
Last changed   : 10/7/2020 3:15:59 PM
                (modified after loading)
    
```

Additional Info : Peak(s) manually integrated

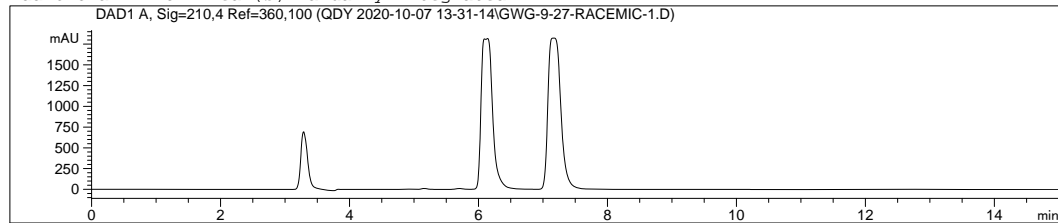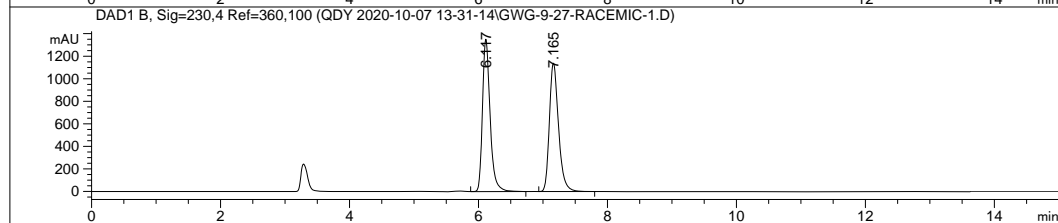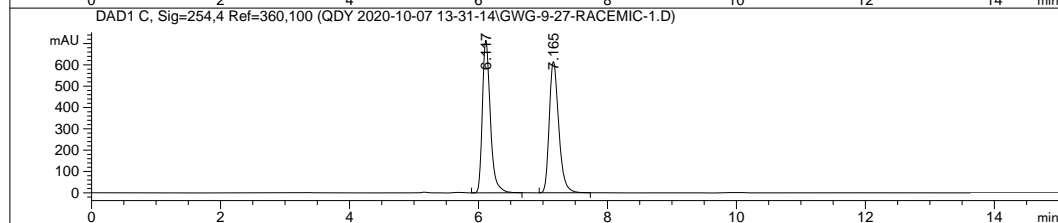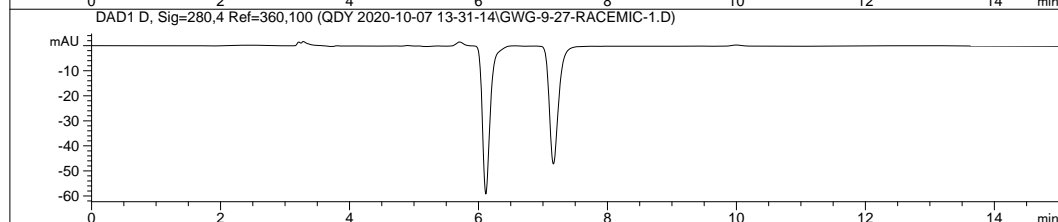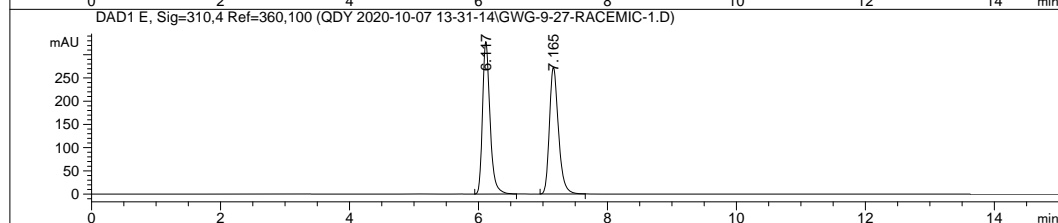

```

=====
                          Area Percent Report
=====
Sorted By      :      Signal
Multiplier    :      1.0000
Dilution      :      1.0000
Use Multiplier & Dilution Factor with ISTDs
    
```

Signal 1: DAD1 A, Sig=210,4 Ref=360,100

Signal 2: DAD1 B, Sig=230,4 Ref=360,100

| Peak # | RetTime [min] | Type | Width [min] | Area [mAU*s] | Height [mAU] | Area %  |
|--------|---------------|------|-------------|--------------|--------------|---------|
| 1      | 6.117         | VB   | 0.1259      | 1.11176e4    | 1352.33630   | 49.7529 |
| 2      | 7.165         | BB   | 0.1509      | 1.12280e4    | 1139.78918   | 50.2471 |

Totals : 2.23456e4 2492.12549

Signal 3: DAD1 C, Sig=254,4 Ref=360,100

| Peak # | RetTime [min] | Type | Width [min] | Area [mAU*s] | Height [mAU] | Area %  |
|--------|---------------|------|-------------|--------------|--------------|---------|
| 1      | 6.117         | VB   | 0.1321      | 6139.44727   | 715.44751    | 49.4387 |
| 2      | 7.165         | BB   | 0.1570      | 6278.86475   | 615.34839    | 50.5613 |

Totals : 1.24183e4 1330.79590

Signal 4: DAD1 D, Sig=280,4 Ref=360,100

Signal 5: DAD1 E, Sig=310,4 Ref=360,100

| Peak # | RetTime [min] | Type | Width [min] | Area [mAU*s] | Height [mAU] | Area %  |
|--------|---------------|------|-------------|--------------|--------------|---------|
| 1      | 6.117         | BB   | 0.1240      | 2645.59888   | 328.34546    | 49.9186 |
| 2      | 7.165         | BB   | 0.1495      | 2654.22241   | 272.84219    | 50.0814 |

Totals : 5299.82129 601.18765

\*\*\* End of Report

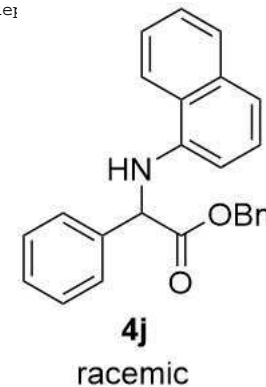

```

=====
Acq. Operator   :                               Seq. Line :    7
Acq. Instrument : Instrument 1                   Location  : Vial 53
Injection Date  : 10/7/2020 3:42:22 PM          Inj       :    1
                                                Inj Volume: 5.000 µl
Different Inj Volume from Sequence ! Actual Inj Volume : 3.000 µl
Acq. Method    : C:\CHEM32\1\DATA\QDY 2020-10-07 13-31-14\IC-05-10.M
Last changed   : 11/7/2016 7:56:52 PM
Analysis Method: C:\CHEM32\1\METHODS\IC-10-10.M
Last changed   : 10/7/2020 3:15:59 PM
                (modified after loading)
    
```

Additional Info : Peak(s) manually integrated

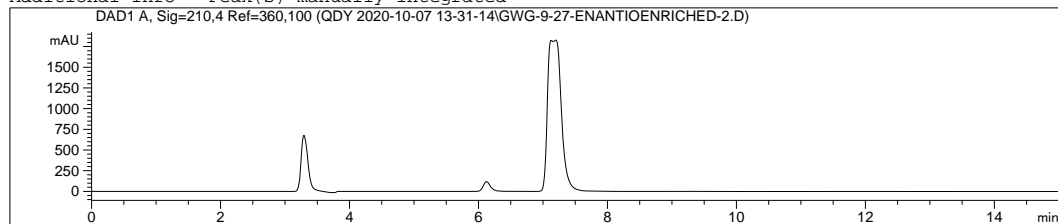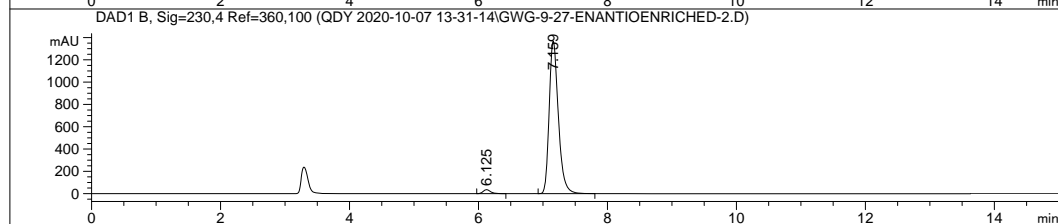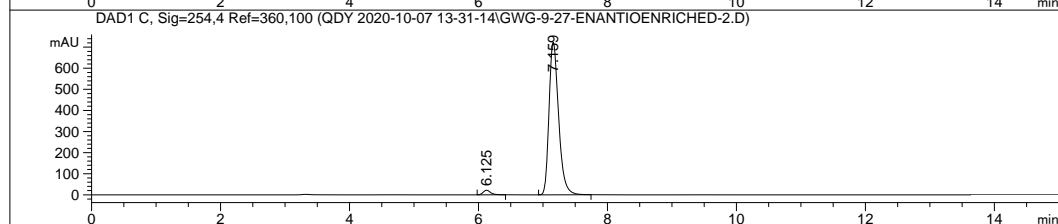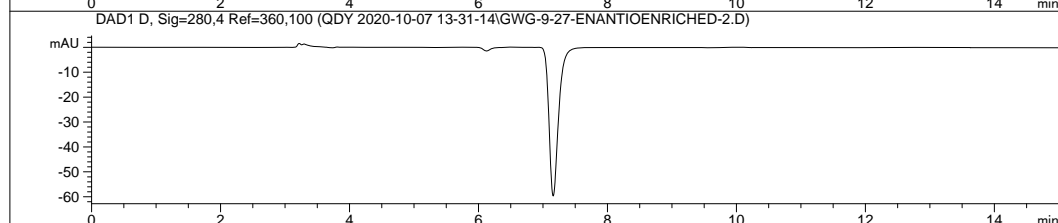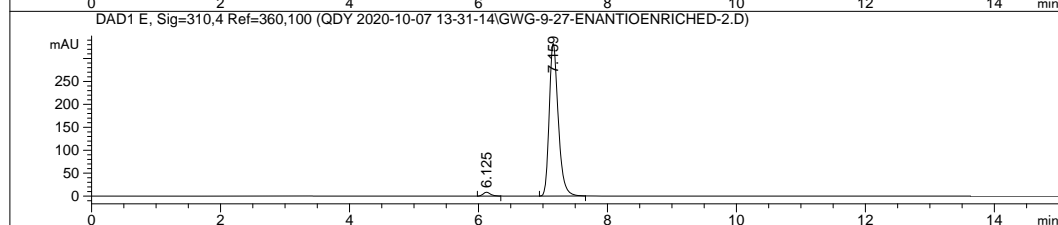

Area Percent Report

```

Sorted By      : Signal
Multiplier    : 1.0000
Dilution      : 1.0000
Use Multiplier & Dilution Factor with ISTDs
    
```

Signal 1: DAD1 A, Sig=210,4 Ref=360,100

Signal 2: DAD1 B, Sig=230,4 Ref=360,100

| Peak # | RetTime [min] | Type | Width [min] | Area [mAU*s] | Height [mAU] | Area %  |
|--------|---------------|------|-------------|--------------|--------------|---------|
| 1      | 6.125         | BB   | 0.1212      | 290.68652    | 36.37012     | 2.1018  |
| 2      | 7.159         | BB   | 0.1515      | 1.35396e4    | 1367.80579   | 97.8982 |

Totals : 1.38303e4 1404.17590

Signal 3: DAD1 C, Sig=254,4 Ref=360,100

| Peak # | RetTime [min] | Type | Width [min] | Area [mAU*s] | Height [mAU] | Area %  |
|--------|---------------|------|-------------|--------------|--------------|---------|
| 1      | 6.125         | BB   | 0.1205      | 173.70937    | 21.91705     | 2.2736  |
| 2      | 7.159         | BB   | 0.1585      | 7466.68164   | 722.99261    | 97.7264 |

Totals : 7640.39101 744.90967

Signal 4: DAD1 D, Sig=280,4 Ref=360,100

Signal 5: DAD1 E, Sig=310,4 Ref=360,100

| Peak # | RetTime [min] | Type | Width [min] | Area [mAU*s] | Height [mAU] | Area %  |
|--------|---------------|------|-------------|--------------|--------------|---------|
| 1      | 6.125         | BB   | 0.1201      | 67.05098     | 8.48922      | 2.0295  |
| 2      | 7.159         | BB   | 0.1476      | 3236.80176   | 332.52371    | 97.9705 |

Totals : 3303.85274 341.01294

\*\*\* End of Report \*\*\*

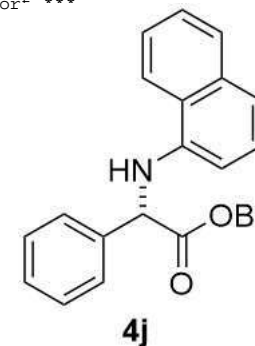

enantioenriched

Sample Name:

```

=====
Acq. Operator   :                               Seq. Line :    2
Acq. Instrument : Instrument 1                   Location  : Vial 57
Injection Date  : 10/14/2020 10:52:26 AM      Inj       :    1
                                                Inj Volume: 5.000 µl
Different Inj Volume from Sequence !      Actual Inj Volume : 3.000 µl
Acq. Method    : C:\CHEM32\1\DATA\QDY 2020-10-14 10-39-34\IC-15-30.M
Last changed   : 10/14/2020 11:07:54 AM
                (modified after loading)
Analysis Method : C:\CHEM32\1\METHODS\IC-10-10.M
Last changed   : 10/13/2020 3:09:05 PM
                (modified after loading)
Additional Info : Peak(s) manually integrated
  
```

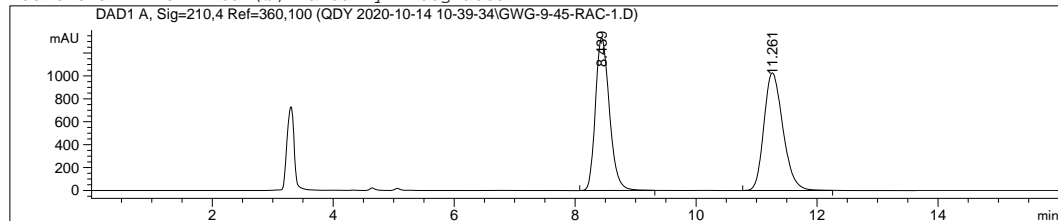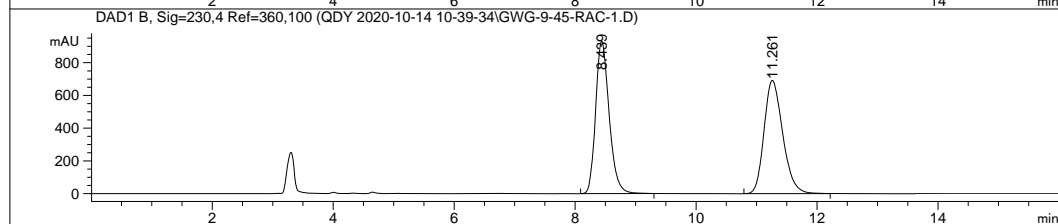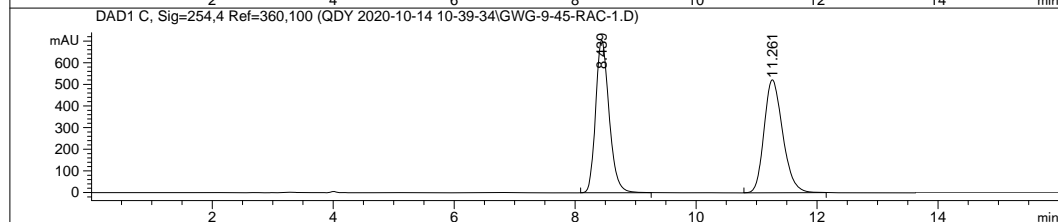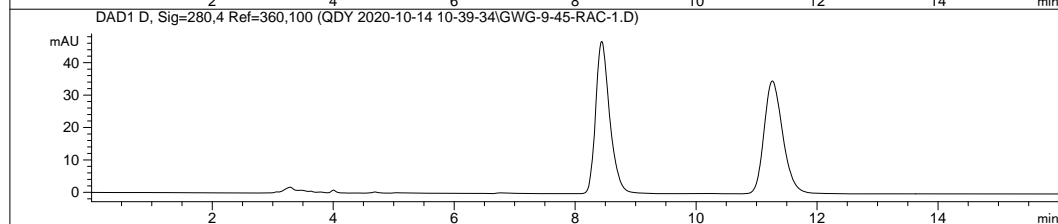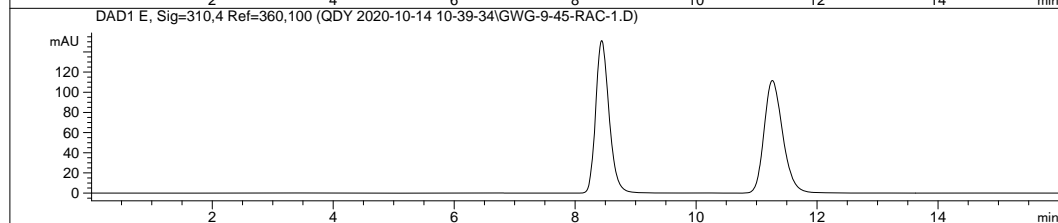

Sample Name:

```

=====
                          Area Percent Report
=====
Sorted By      :      Signal
Multiplier     :      1.0000
Dilution       :      1.0000
Use Multiplier & Dilution Factor with ISTDs
  
```

Signal 1: DAD1 A, Sig=210,4 Ref=360,100

| Peak # | RetTime [min] | Type | Width [min] | Area [mAU*s] | Height [mAU] | Area %  |
|--------|---------------|------|-------------|--------------|--------------|---------|
| 1      | 8.439         | BB   | 0.2515      | 2.13805e4    | 1330.68018   | 48.8228 |
| 2      | 11.261        | BB   | 0.3386      | 2.24116e4    | 1026.86865   | 51.1772 |

Totals : 4.37922e4 2357.54883

Signal 2: DAD1 B, Sig=230,4 Ref=360,100

| Peak # | RetTime [min] | Type | Width [min] | Area [mAU*s] | Height [mAU] | Area %  |
|--------|---------------|------|-------------|--------------|--------------|---------|
| 1      | 8.439         | BB   | 0.2392      | 1.44721e4    | 931.64526    | 49.3388 |
| 2      | 11.261        | BB   | 0.3325      | 1.48600e4    | 692.00183    | 50.6612 |

Totals : 2.93321e4 1623.64709

Signal 3: DAD1 C, Sig=254,4 Ref=360,100

| Peak # | RetTime [min] | Type | Width [min] | Area [mAU*s] | Height [mAU] | Area %  |
|--------|---------------|------|-------------|--------------|--------------|---------|
| 1      | 8.439         | BB   | 0.2382      | 1.08844e4    | 704.60242    | 49.3548 |
| 2      | 11.261        | BB   | 0.3297      | 1.11689e4    | 521.76050    | 50.6452 |

Totals : 2.20533e4 1226.36292

Signal 4: DAD1 D, Sig=280,4 Ref=360,100

Signal 5: DAD1 E, Sig=310,4 Ref=360,100

\*\*\* End of Report \*\*\*

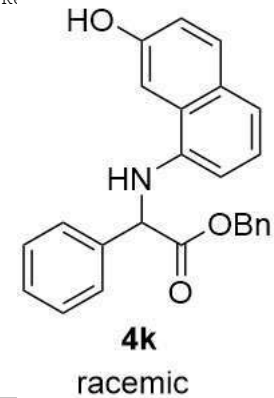

Sample Name:

```

=====
Acq. Operator   :                               Seq. Line :    3
Acq. Instrument : Instrument 1                  Location  : Vial 58
Injection Date  : 10/14/2020 11:09:26 AM      Inj       :    1
                                                Inj Volume: 5.000 µl
Different Inj Volume from Sequence !      Actual Inj Volume : 3.000 µl
Acq. Method    : C:\CHEM32\1\DATA\QDY 2020-10-14 10-39-34\IC-15-30.M
Last changed   : 10/14/2020 11:07:54 AM
                                                (modified after loading)
Analysis Method : C:\CHEM32\1\METHODS\IC-10-10.M
Last changed   : 10/14/2020 1:01:38 PM
                                                (modified after loading)
Additional Info : Peak(s) manually integrated

```

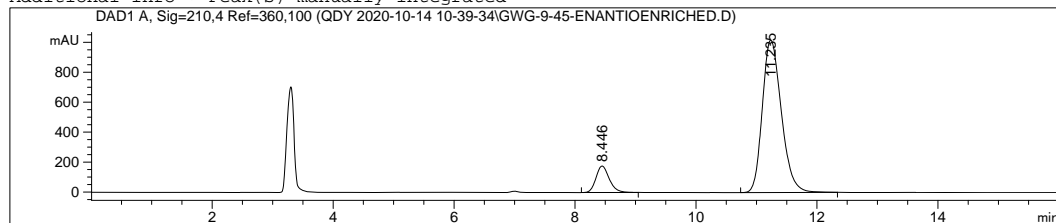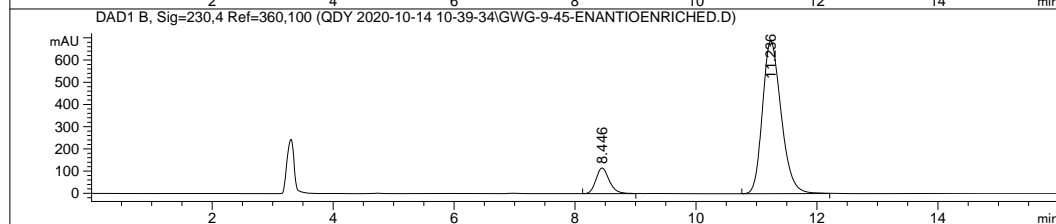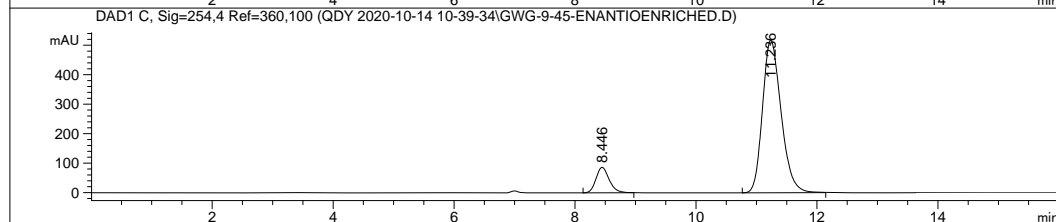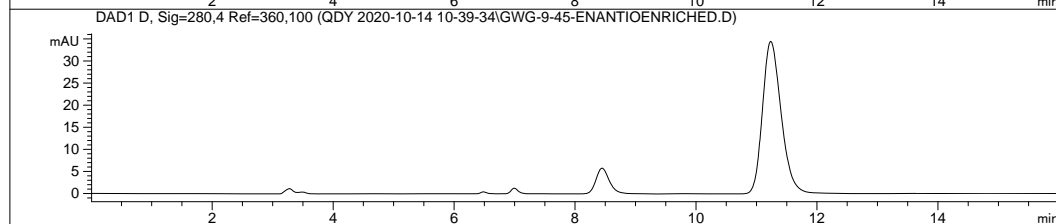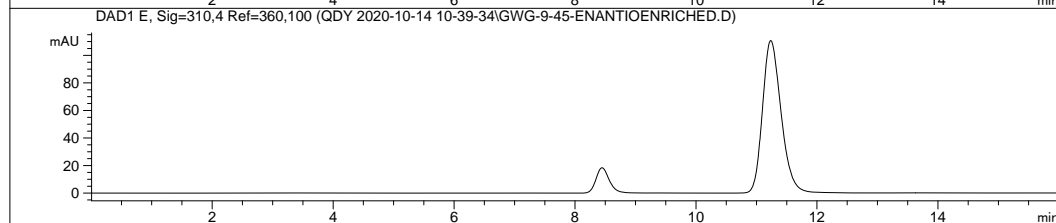

Sample Name:

```

=====
Area Percent Report
=====
Sorted By      :      Signal
Multiplier     :      1.0000
Dilution       :      1.0000
Use Multiplier & Dilution Factor with ISTDs

```

Signal 1: DAD1 A, Sig=210,4 Ref=360,100

| Peak # | RetTime [min] | Type | Width [min] | Area [mAU*s] | Height [mAU] | Area %  |
|--------|---------------|------|-------------|--------------|--------------|---------|
| 1      | 8.446         | BB   | 0.2358      | 2702.72705   | 177.31659    | 10.8500 |
| 2      | 11.235        | BB   | 0.3364      | 2.22072e4    | 1018.38885   | 89.1500 |

Totals : 2.49099e4 1195.70544

Signal 2: DAD1 B, Sig=230,4 Ref=360,100

| Peak # | RetTime [min] | Type | Width [min] | Area [mAU*s] | Height [mAU] | Area %  |
|--------|---------------|------|-------------|--------------|--------------|---------|
| 1      | 8.446         | BB   | 0.2352      | 1753.85803   | 115.46138    | 10.6558 |
| 2      | 11.236        | BB   | 0.3319      | 1.47054e4    | 686.47485    | 89.3442 |

Totals : 1.64592e4 801.93623

Signal 3: DAD1 C, Sig=254,4 Ref=360,100

| Peak # | RetTime [min] | Type | Width [min] | Area [mAU*s] | Height [mAU] | Area %  |
|--------|---------------|------|-------------|--------------|--------------|---------|
| 1      | 8.446         | BB   | 0.2349      | 1311.83582   | 86.53835     | 10.6102 |
| 2      | 11.236        | BB   | 0.3292      | 1.10520e4    | 517.47736    | 89.3898 |

Totals : 1.23639e4 604.01570

Signal 4: DAD1 D, Sig=280,4 Ref=360,100

Signal 5: DAD1 E, Sig=310,4 Ref=360,100

\*\*\* End of Report \*\*

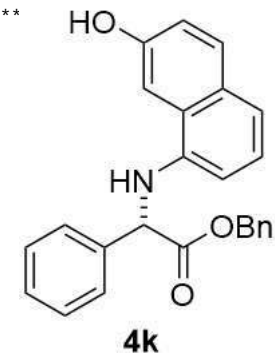

enantioenriched

Sample Name:

```

=====
Acq. Operator   :                               Seq. Line :    5
Acq. Instrument : Instrument 1                   Location  : Vial 59
Injection Date  : 10/14/2020 11:37:31 AM      Inj       :    1
                                           Inj Volume: 5.000 µl
Different Inj Volume from Sequence ! Actual Inj Volume : 3.000 µl
Acq. Method    : C:\CHEM32\1\DATA\QDY 2020-10-14 10-39-34\IC-15-40.M
Last changed   : 10/14/2020 12:15:39 PM
                (modified after loading)
Analysis Method: C:\CHEM32\1\METHODS\IC-10-10.M
Last changed   : 10/14/2020 12:31:17 PM
                (modified after loading)
Additional Info : Peak(s) manually integrated

```

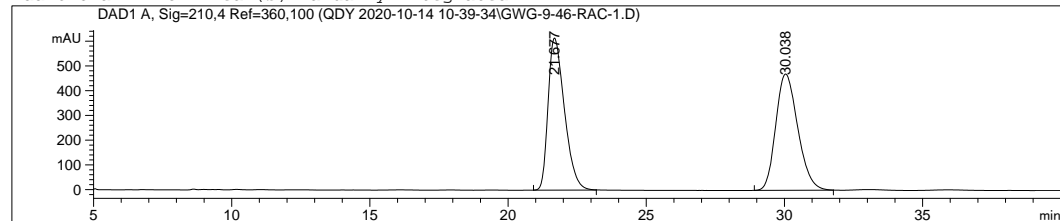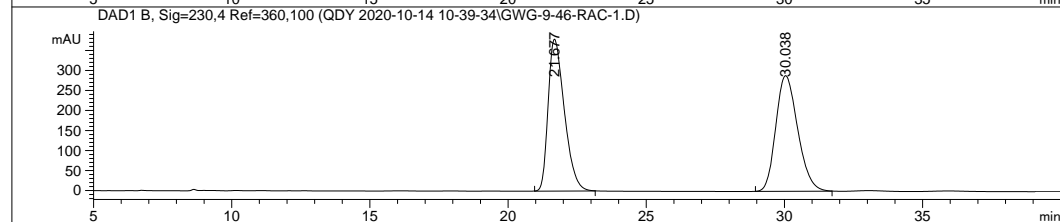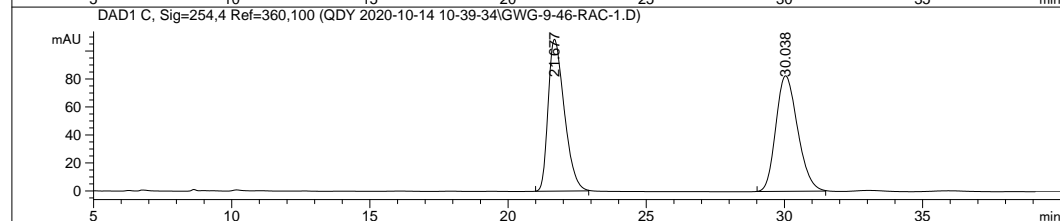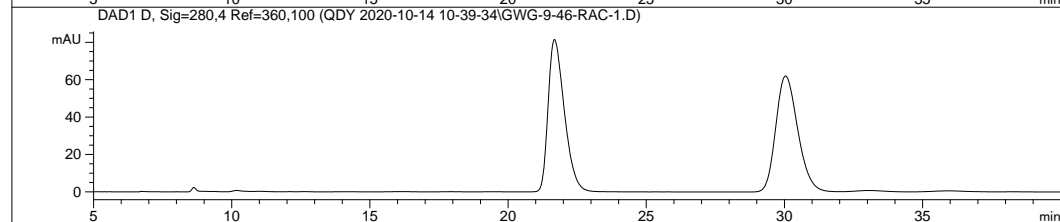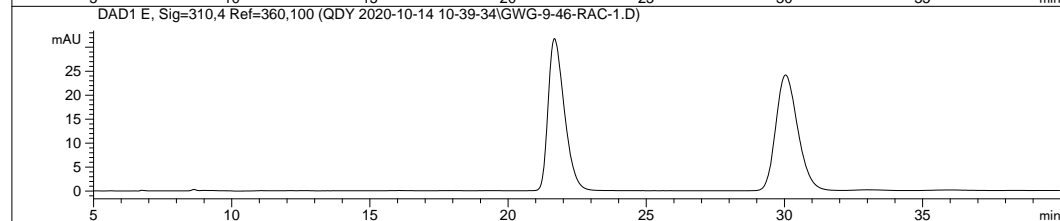

Sample Name:

```

=====
                          Area Percent Report
=====
Sorted By      :      Signal
Multiplier     :      1.0000
Dilution       :      1.0000
Use Multiplier & Dilution Factor with ISTDs

```

Signal 1: DAD1 A, Sig=210,4 Ref=360,100

| Peak # | RetTime [min] | Type | Width [min] | Area [mAU*s] | Height [mAU] | Area %  |
|--------|---------------|------|-------------|--------------|--------------|---------|
| 1      | 21.677        | BB   | 0.6281      | 2.51847e4    | 614.54395    | 49.1836 |
| 2      | 30.038        | BB   | 0.8638      | 2.60207e4    | 470.05878    | 50.8164 |

Totals : 5.12054e4 1084.60272

Signal 2: DAD1 B, Sig=230,4 Ref=360,100

| Peak # | RetTime [min] | Type | Width [min] | Area [mAU*s] | Height [mAU] | Area %  |
|--------|---------------|------|-------------|--------------|--------------|---------|
| 1      | 21.677        | BB   | 0.6271      | 1.54567e4    | 379.52521    | 49.2456 |
| 2      | 30.038        | BB   | 0.8592      | 1.59302e4    | 288.94968    | 50.7544 |

Totals : 3.13870e4 668.47488

Signal 3: DAD1 C, Sig=254,4 Ref=360,100

| Peak # | RetTime [min] | Type | Width [min] | Area [mAU*s] | Height [mAU] | Area %  |
|--------|---------------|------|-------------|--------------|--------------|---------|
| 1      | 21.677        | BB   | 0.6270      | 4400.36768   | 108.52980    | 49.2967 |
| 2      | 30.038        | BB   | 0.8558      | 4525.93311   | 82.52726     | 50.7033 |

Totals : 8926.30078 191.05706

Signal 4: DAD1 D, Sig=280,4 Ref=360,100

Signal 5: DAD1 E, Sig=310,4 Ref=360,100

\*\*\* End of Report \*\*\*

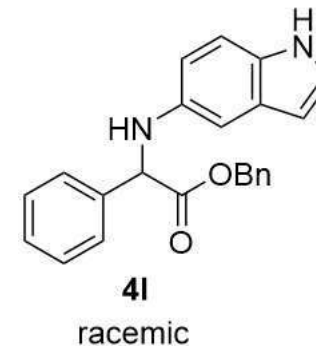

```

=====
Acq. Operator   :                               Seq. Line :    6
Acq. Instrument : Instrument 1                   Location  : Vial 60
Injection Date  : 10/14/2020 12:18:30 PM       Inj       :    1
                                                Inj Volume: 5.000 µl
Different Inj Volume from Sequence ! Actual Inj Volume : 3.000 µl
Acq. Method    : C:\CHEM32\1\DATA\QDY 2020-10-14 10-39-34\IC-15-40.M
Last changed   : 10/14/2020 12:15:39 PM
                (modified after loading)
Analysis Method: C:\CHEM32\1\METHODS\IC-10-10.M
Last changed   : 10/14/2020 12:31:17 PM
                (modified after loading)
Additional Info : Peak(s) manually integrated
  
```

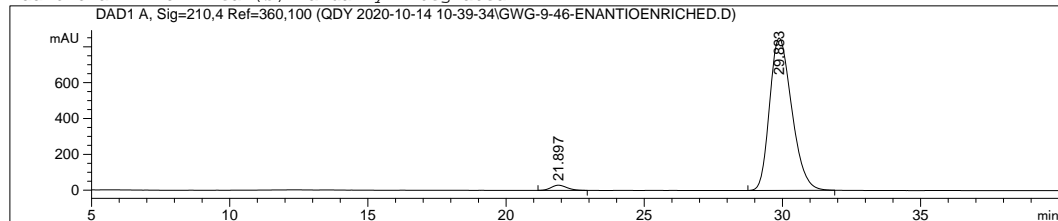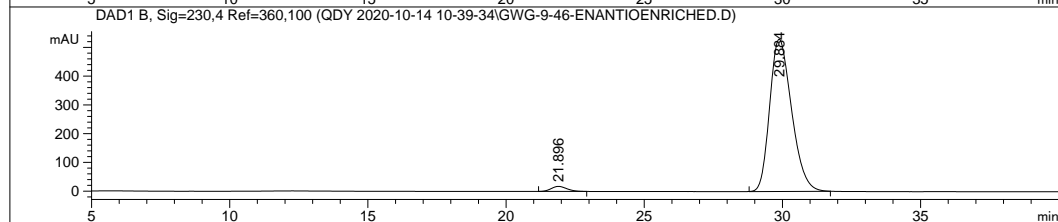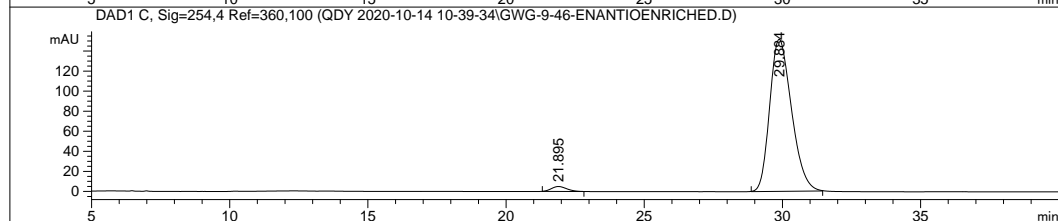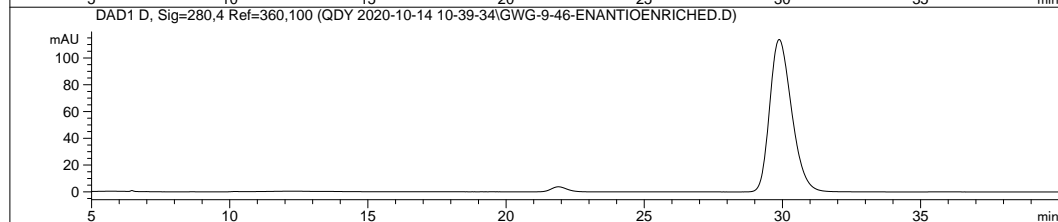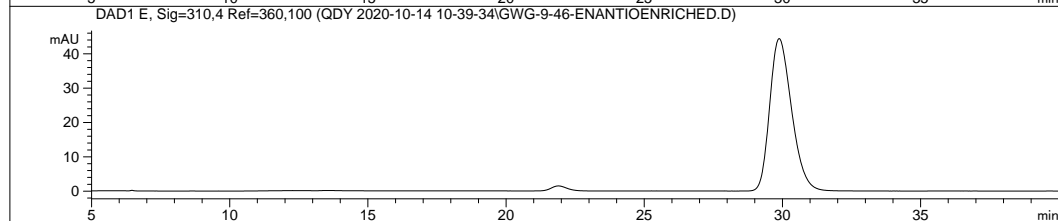

```

=====
                          Area Percent Report
=====
Sorted By      :      Signal
Multiplier    :      1.0000
Dilution      :      1.0000
Use Multiplier & Dilution Factor with ISTDs
  
```

Signal 1: DAD1 A, Sig=210,4 Ref=360,100

| Peak # | RetTime [min] | Type | Width [min] | Area [mAU*s] | Height [mAU] | Area %  |
|--------|---------------|------|-------------|--------------|--------------|---------|
| 1      | 21.897        | BB   | 0.6095      | 1146.09558   | 28.84826     | 2.3669  |
| 2      | 29.883        | BB   | 0.8670      | 4.72760e4    | 849.81744    | 97.6331 |

Totals : 4.84221e4 878.66570

Signal 2: DAD1 B, Sig=230,4 Ref=360,100

| Peak # | RetTime [min] | Type | Width [min] | Area [mAU*s] | Height [mAU] | Area %  |
|--------|---------------|------|-------------|--------------|--------------|---------|
| 1      | 21.896        | BB   | 0.6131      | 693.52252    | 17.54854     | 2.3242  |
| 2      | 29.884        | BB   | 0.8558      | 2.91458e4    | 529.84003    | 97.6758 |

Totals : 2.98393e4 547.38856

Signal 3: DAD1 C, Sig=254,4 Ref=360,100

| Peak # | RetTime [min] | Type | Width [min] | Area [mAU*s] | Height [mAU] | Area %  |
|--------|---------------|------|-------------|--------------|--------------|---------|
| 1      | 21.895        | BB   | 0.5738      | 189.12512    | 4.90505      | 2.2269  |
| 2      | 29.884        | BB   | 0.8487      | 8303.75391   | 151.67230    | 97.7731 |

Totals : 8492.87903 156.57735

Signal 4: DAD1 D, Sig=280,4 Ref=360,100

Signal 5: DAD1 E, Sig=310,4 Ref=360,100

\*\*\* End of Report \*\*\*

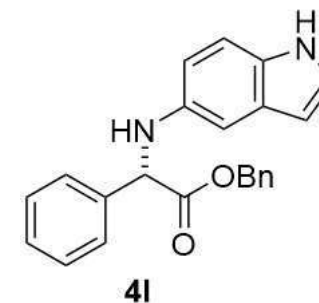

enantioenriched



Sample Name:

```

=====
Acq. Operator   :                               Seq. Line :    2
Acq. Instrument : Instrument 1                  Location  : Vial 55
Injection Date  : 10/18/2020 1:58:42 AM       Inj       :    1
                                                Inj Volume: 5.000 µl
Different Inj Volume from Sequence !      Actual Inj Volume : 3.000 µl
Acq. Method    : C:\CHEM32\1\DATA\QDY 2020-10-18 01-45-53\IC-10-40.M
Last changed   : 10/18/2020 1:57:50 AM
                                                (modified after loading)
Analysis Method: C:\CHEM32\1\METHODS\IC-10-10.M
Last changed   : 10/18/2020 3:08:48 AM
                                                (modified after loading)
Additional Info : Peak(s) manually integrated

```

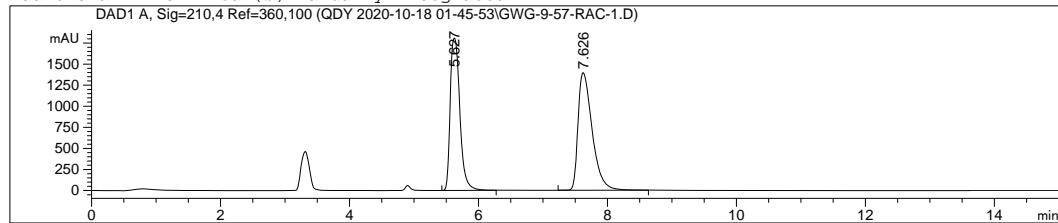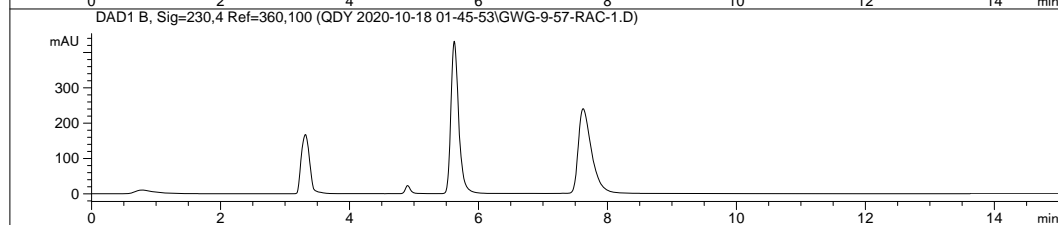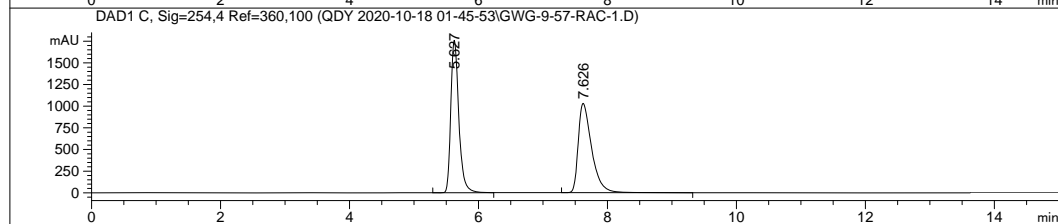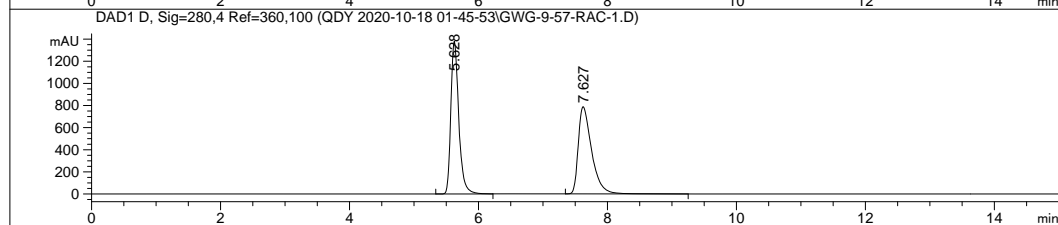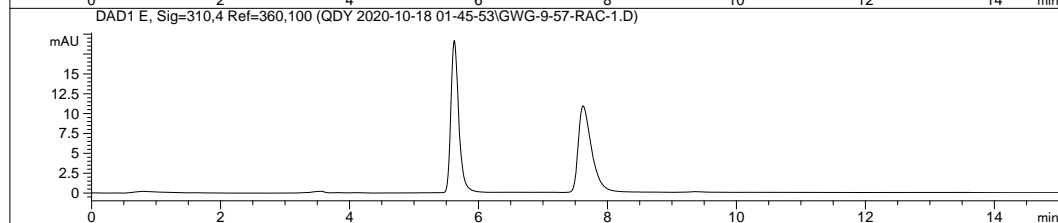

Sample Name:

```

=====
                          Area Percent Report
=====
Sorted By      :      Signal
Multiplier    :      1.0000
Dilution      :      1.0000
Use Multiplier & Dilution Factor with ISTDs

```

Signal 1: DAD1 A, Sig=210,4 Ref=360,100

| Peak # | RetTime [min] | Type | Width [min] | Area [mAU*s] | Height [mAU] | Area %  |
|--------|---------------|------|-------------|--------------|--------------|---------|
| 1      | 5.627         | BB   | 0.1646      | 1.86868e4    | 1807.71313   | 46.9298 |
| 2      | 7.626         | BB   | 0.2327      | 2.11318e4    | 1395.13196   | 53.0702 |

Totals : 3.98186e4 3202.84509

Signal 2: DAD1 B, Sig=230,4 Ref=360,100

Signal 3: DAD1 C, Sig=254,4 Ref=360,100

| Peak # | RetTime [min] | Type | Width [min] | Area [mAU*s] | Height [mAU] | Area %  |
|--------|---------------|------|-------------|--------------|--------------|---------|
| 1      | 5.627         | VV   | 0.1327      | 1.52001e4    | 1760.59485   | 50.5955 |
| 2      | 7.626         | BB   | 0.2180      | 1.48423e4    | 1030.91711   | 49.4045 |

Totals : 3.00425e4 2791.51196

Signal 4: DAD1 D, Sig=280,4 Ref=360,100

| Peak # | RetTime [min] | Type | Width [min] | Area [mAU*s] | Height [mAU] | Area %  |
|--------|---------------|------|-------------|--------------|--------------|---------|
| 1      | 5.628         | VV   | 0.1313      | 1.17439e4    | 1379.55884   | 50.9761 |
| 2      | 7.627         | BV   | 0.2172      | 1.12941e4    | 788.16711    | 49.0239 |

Totals : 2.30380e4 2167.72595

Signal 5: DAD1 E, Sig=310,4 Ref=360,100

\*\*\* End of \*\*\*

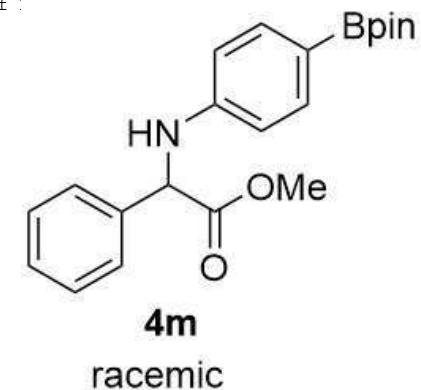

```

=====
Acq. Operator   :                               Seq. Line :    2
Acq. Instrument : Instrument 1                   Location  : Vial 56
Injection Date  : 10/18/2020 3:30:01 AM        Inj       :    1
                                                Inj Volume: 5.000 µl
Different Inj Volume from Sequence ! Actual Inj Volume : 3.000 µl
Acq. Method    : C:\CHEM32\1\DATA\QDY 2020-10-18 03-17-12\IC-10-40.M
Last changed   : 10/18/2020 3:49:22 AM
                (modified after loading)
Analysis Method: C:\CHEM32\1\METHODS\IC-10-10.M
Last changed   : 10/18/2020 3:08:48 AM
                (modified after loading)
Additional Info : Peak(s) manually integrated
    
```

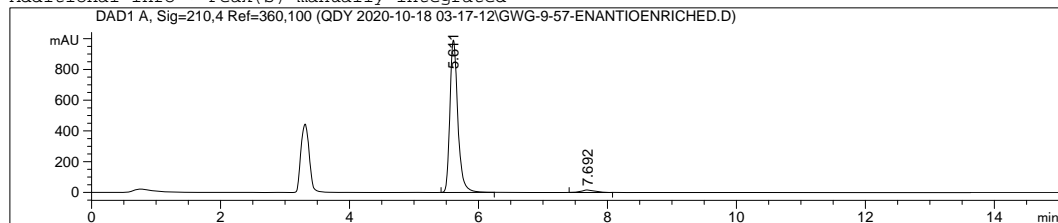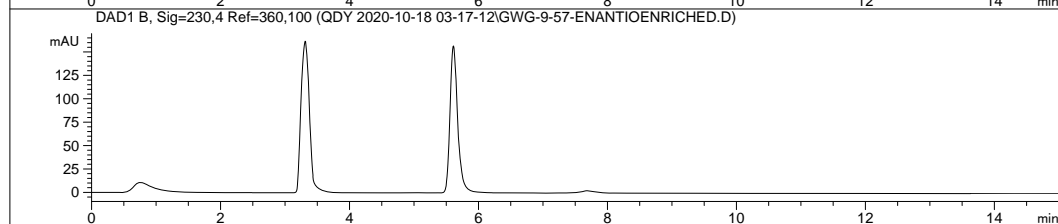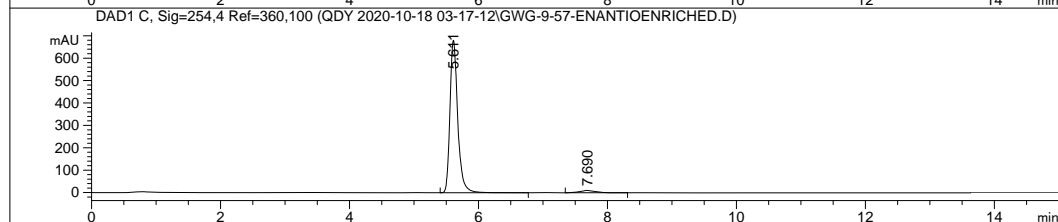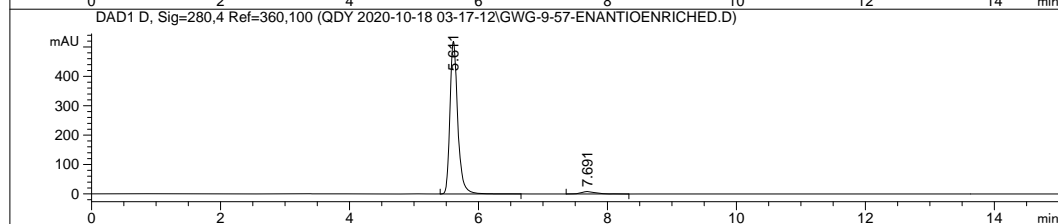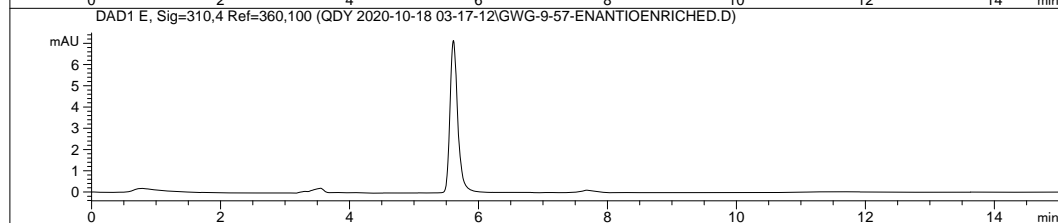

```

=====
                          Area Percent Report
=====
Sorted By      :      Signal
Multiplier     :      1.0000
Dilution      :      1.0000
Use Multiplier & Dilution Factor with ISTDs
    
```

Signal 1: DAD1 A, Sig=210,4 Ref=360,100

| Peak # | RetTime [min] | Type | Width [min] | Area [mAU*s] | Height [mAU] | Area %  |
|--------|---------------|------|-------------|--------------|--------------|---------|
| 1      | 5.611         | BB   | 0.1312      | 8434.75781   | 991.91016    | 97.1912 |
| 2      | 7.692         | BB   | 0.2250      | 243.76651    | 16.43718     | 2.8088  |

Totals : 8678.52432 1008.34734

Signal 2: DAD1 B, Sig=230,4 Ref=360,100

Signal 3: DAD1 C, Sig=254,4 Ref=360,100

| Peak # | RetTime [min] | Type | Width [min] | Area [mAU*s] | Height [mAU] | Area %  |
|--------|---------------|------|-------------|--------------|--------------|---------|
| 1      | 5.611         | BB   | 0.1276      | 5695.63525   | 681.08655    | 97.1358 |
| 2      | 7.690         | BB   | 0.2358      | 167.94266    | 10.65893     | 2.8642  |

Totals : 5863.57791 691.74548

Signal 4: DAD1 D, Sig=280,4 Ref=360,100

| Peak # | RetTime [min] | Type | Width [min] | Area [mAU*s] | Height [mAU] | Area %  |
|--------|---------------|------|-------------|--------------|--------------|---------|
| 1      | 5.611         | BB   | 0.1275      | 4344.18848   | 519.63623    | 97.2627 |
| 2      | 7.691         | BB   | 0.2275      | 122.25819    | 8.12929      | 2.7373  |

Totals : 4466.44666 527.76552

Signal 5: DAD1 E, Sig=310,4 Ref=360,100

\*\*\* End of Report \*\*\*

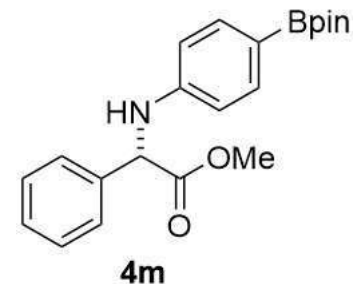

Sample Name:

```

=====
Acq. Operator   :                               Seq. Line : 31
Acq. Instrument : Instrument 1                 Location  : Vial 55
Injection Date  : 10/8/2020 9:53:07 PM       Inj       : 1
                                                Inj Volume: 5.000 µl
Different Inj Volume from Sequence ! Actual Inj Volume : 3.000 µl
Acq. Method    : C:\CHEM32\1\DATA\QDY 2020-10-08 10-40-29\IC-01-30.M
Last changed   : 10/8/2020 10:13:24 PM
                (modified after loading)
Analysis Method: C:\CHEM32\1\METHODS\IC-10-10.M
Last changed   : 10/9/2020 9:16:59 AM
                (modified after loading)
Additional Info : Peak(s) manually integrated
  
```

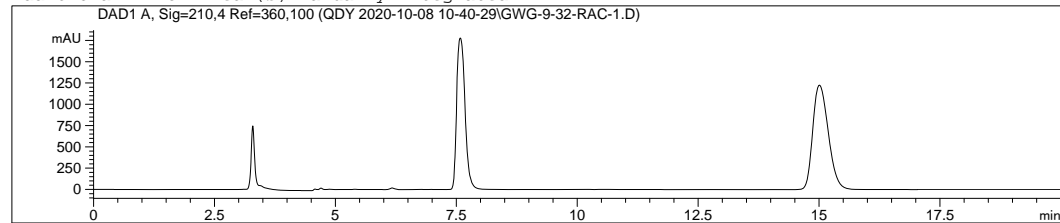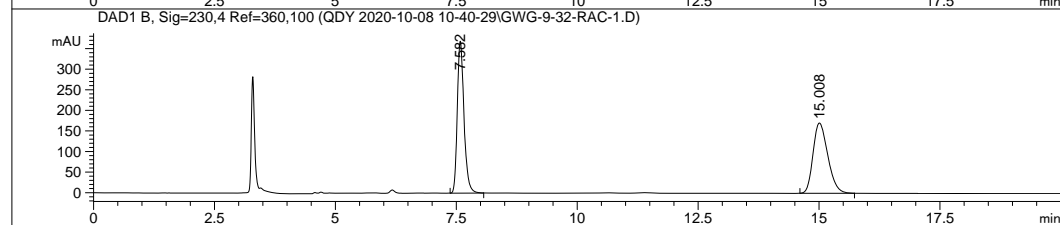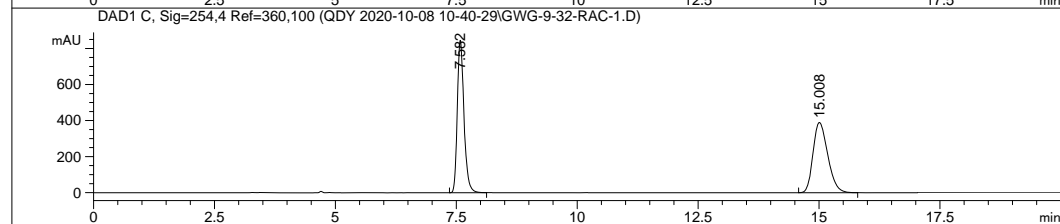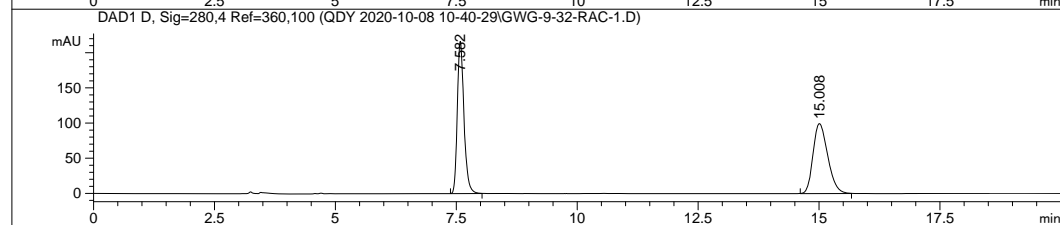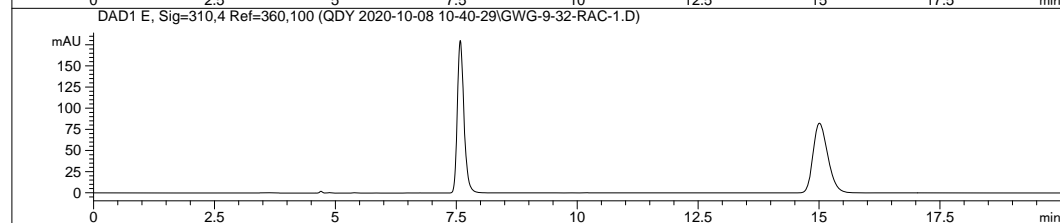

Sample Name:

```

=====
                          Area Percent Report
=====
Sorted By      :      Signal
Multiplier    :      1.0000
Dilution      :      1.0000
Use Multiplier & Dilution Factor with ISTDs
  
```

Signal 1: DAD1 A, Sig=210,4 Ref=360,100

Signal 2: DAD1 B, Sig=230,4 Ref=360,100

| Peak # | RetTime [min] | Type | Width [min] | Area [mAU*s] | Height [mAU] | Area %  |
|--------|---------------|------|-------------|--------------|--------------|---------|
| 1      | 7.582         | BB   | 0.1454      | 3527.45117   | 369.34955    | 49.3506 |
| 2      | 15.008        | BB   | 0.3291      | 3620.28809   | 170.92700    | 50.6494 |

Totals : 7147.73926 540.27655

Signal 3: DAD1 C, Sig=254,4 Ref=360,100

| Peak # | RetTime [min] | Type | Width [min] | Area [mAU*s] | Height [mAU] | Area %  |
|--------|---------------|------|-------------|--------------|--------------|---------|
| 1      | 7.582         | BB   | 0.1451      | 8058.27930   | 846.47894    | 49.4369 |
| 2      | 15.008        | BB   | 0.3284      | 8241.85156   | 390.29160    | 50.5631 |

Totals : 1.63001e4 1236.77054

Signal 4: DAD1 D, Sig=280,4 Ref=360,100

| Peak # | RetTime [min] | Type | Width [min] | Area [mAU*s] | Height [mAU] | Area %  |
|--------|---------------|------|-------------|--------------|--------------|---------|
| 1      | 7.582         | BB   | 0.1449      | 2058.31763   | 216.52385    | 49.5131 |
| 2      | 15.008        | BB   | 0.3280      | 2098.79883   | 99.53104     | 50.4869 |

Totals : 4157.11646 316.05489

Signal 5: DAD1 E, Sig=310,4 Ref=360,100

\*\*\* End of R

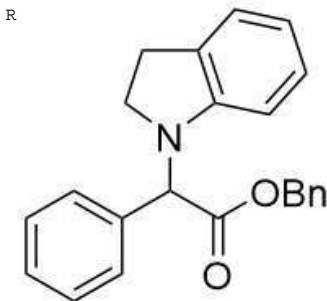

4n

racemic

S-243

```

=====
Acq. Operator   :                               Seq. Line :   32
Acq. Instrument : Instrument 1                   Location  : Vial 56
Injection Date  : 10/8/2020 10:15:06 PM        Inj       :    1
                                                Inj Volume: 5.000 µl
Different Inj Volume from Sequence ! Actual Inj Volume : 3.000 µl
Acq. Method    : C:\CHEM32\1\DATA\QDY 2020-10-08 10-40-29\IC-01-30.M
Last changed   : 10/8/2020 10:13:24 PM
                (modified after loading)
Analysis Method: C:\CHEM32\1\METHODS\IC-10-10.M
Last changed   : 10/9/2020 9:16:59 AM
                (modified after loading)
Additional Info : Peak(s) manually integrated
  
```

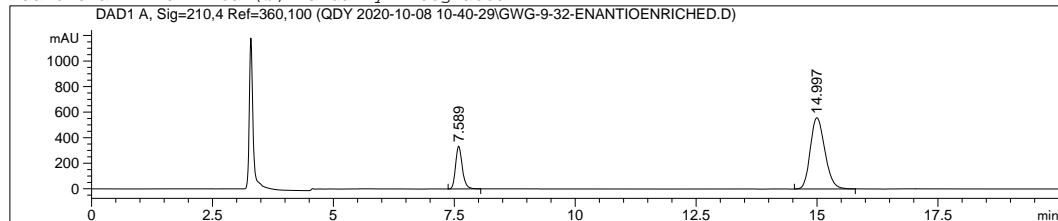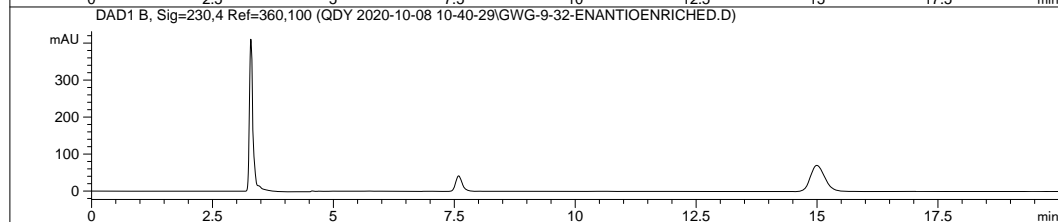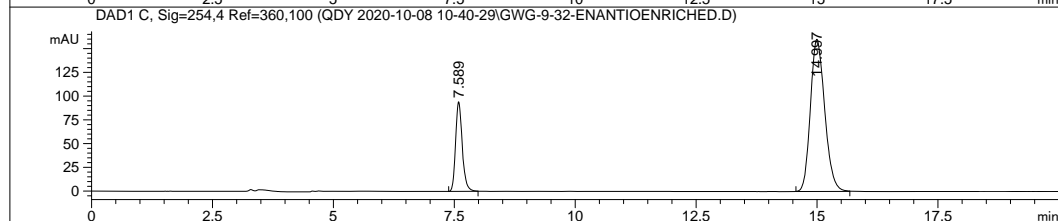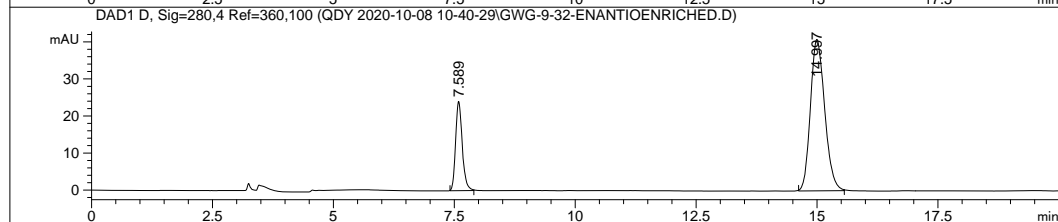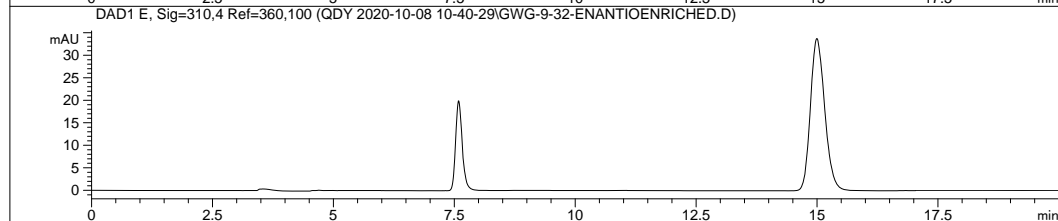

```

=====
                          Area Percent Report
=====
Sorted By      :      Signal
Multiplier    :      1.0000
Dilution      :      1.0000
Use Multiplier & Dilution Factor with ISTDs
  
```

Signal 1: DAD1 A, Sig=210,4 Ref=360,100

| Peak # | RetTime [min] | Type | Width [min] | Area [mAU*s] | Height [mAU] | Area %  |
|--------|---------------|------|-------------|--------------|--------------|---------|
| 1      | 7.589         | BB   | 0.1482      | 3222.64893   | 334.94791    | 21.6830 |
| 2      | 14.997        | BB   | 0.3254      | 1.16399e4    | 558.03113    | 78.3170 |

Totals : 1.48626e4 892.97903

Signal 2: DAD1 B, Sig=230,4 Ref=360,100

Signal 3: DAD1 C, Sig=254,4 Ref=360,100

| Peak # | RetTime [min] | Type | Width [min] | Area [mAU*s] | Height [mAU] | Area %  |
|--------|---------------|------|-------------|--------------|--------------|---------|
| 1      | 7.589         | BB   | 0.1475      | 901.81421    | 94.37266     | 21.4680 |
| 2      | 14.997        | BB   | 0.3183      | 3298.93115   | 160.18419    | 78.5320 |

Totals : 4200.74536 254.55685

Signal 4: DAD1 D, Sig=280,4 Ref=360,100

| Peak # | RetTime [min] | Type | Width [min] | Area [mAU*s] | Height [mAU] | Area %  |
|--------|---------------|------|-------------|--------------|--------------|---------|
| 1      | 7.589         | BB   | 0.1472      | 229.86629    | 24.12297     | 21.5039 |
| 2      | 14.997        | BB   | 0.3176      | 839.08405    | 40.85781     | 78.4961 |

Totals : 1068.95033 64.98078

Signal 5: DAD1 E, Sig=310,4 Ref=360,100

\*\*\* End of Report \*\*\*

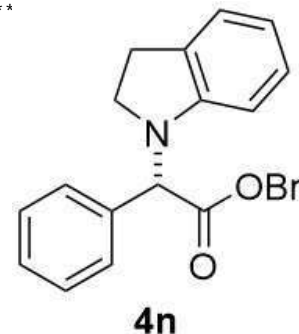

Supplement: d1sc02439f1.pdf [file d1sc02439f1.pdf]
